# Supplementary material for: Multimodal hate speech detection: a novel deep learning framework for multilingual text and images
Source: PeerJ Comput Sci. 2025 Apr 16;11:e2801. doi: 10.7717/peerj-cs.2801 (PMC12190340; doi:10.7717/peerj-cs.2801)
Supplement: Supplemental Information 13 [file peerj-cs-11-2801-s013.xlsx]

## Sheet: Sheet1
Tweet_Id	Text	Text(English)	Image_Text	Image_Text(English)	Label
1596192893743796224	مرد کی بہت سی پریشانیاں خوبصورت عورت کو دیکھ کر ختم ہو جاتی ہیں !❤ https://t.co/8lVOglzJMh	Many of a man's problems disappear when he sees a beautiful woman!❤ https://t.co/8lVOglzJMh	NIL	NIL	No_Hate
1579509182524723200	یورپی ممالک کو گیس اور بجلی کی قلت کے باعث موسم سرما میں بجلی کی لوڈشیڈنگ کا سامنا ہو سکتا ہے۔روس کی نورڈ گیس پائپ لائن کی تباہی کے بعد گیس...👇 https://t.co/J6pnxjx3Ve #InternationalNews #10thoct2022 #Europe #loadshedding #fire #TVN #TVNUrdu #TVNWorld #TheViewsNetwork https://t.co/wNlvKE5Rmw	European countries may face electricity loadshedding in winter due to gas and electricity shortages. After the destruction of Russia's Nord Gas Pipeline, gas...👇 https://t.co/J6pnxjx3Ve #InternationalNews #10thoct2022 #Europe #loadshedding #fire #TVN #TVNUrdu #TVNWorld #TheViewsNetwork https://t.co/wNlvKE5Rmw	NIL	NIL	No_Hate
1593185358476644352	نائب صدر مسلم لیگ ن پنجاب رانا مشہود احمد خاں کی وفاقی وزیر اطلاعات محترمہ مریم اورنگزیب سے ملاقات۔ ملاقات میں موجود ملکی سیاسی صورتحال سمیت دیگر اہم امور پر تبادلہ بھی تبادلہ خیال ہوا۔ https://t.co/q5VLsNjId5	Vice President Muslim League-N Punjab Rana Mashhood Ahmed Khan meeting with Federal Minister for Information Ms. Maryam Aurangzeb. In the meeting, the political situation of the country and other important issues were also discussed. https://t.co/q5VLsNjId5	NIL	NIL	No_Hate
1567553396592332809	@MriyumKhan1122 نیازی کتے نائی ہرامی کی چھترول کرنے کے لئے،،اور بہت سے دوست بنانے کےلیے، https://t.co/jelUd1gRMH	@MriyumKhan1122 for taking care of Niazi dog Nai Harami, and making many friends, https://t.co/jelUd1gRMH	NIL	NIL	Hate
1598693173974515712	بلوچ ،پشتون ،سرائیکی اور ہزارہ سمیت تمام اقوام نیشنل پارٹی کو مظبوط بنائیں، نیشنل پارٹی کی واضح پالیسی اور مخلص قیادت کی بدولت نیشنل پارٹی میں تمام اقوام سے تعلق رکھنے والے شامل ہورہےہیں ۔ صوبائی خواتین سیکریٹری گودی کلثوم نیاز بلوچ @KalsoomNiazNp https://t.co/Q5JacWRami	All nations including Baloch, Pashtun, Saraiki and Hazara should strengthen the National Party, thanks to the clear policy and sincere leadership of the National Party, people belonging to all nations are joining the National Party. Provincial Women Secretary Godi Kulsoom Niaz Baloch @KalsoomNiazNp https://t.co/Q5JacWRami	لوم اقوام م لکر اپنے مو کا دفا عکر کتے ہیں اس سے لے تخل پر کی بچترین فورم سے اد ؛پچخن ‏ سرانگی اور ہزارہ صبیت تام اقوام یشنل پار یکو مطبوط بنائیںء شمولیتی پہ ورام سے خطاب	All the nations of the world are the dogs of their mouths From the most recent forum, Pichkhan Sarangi and Hazara Sabit Tam Address by Waram on making the United Nations stronger and joining	No_Hate
1558959543933194243	کوئ والدین،استاد،حکمران،سیاستدان، جج،جنرل،سول سوسائیٹی ٹھیکیداربتائیگا 75 سال ہعد پاکستان میں آجتک کوئ بل گیٹس، ایلن مسک اورجیف بیزوز کیوں پیدا نہیں ہوا؟ یہ کھرب پتی ہی نہیں بالکہ الترتیب مائیکروسافٹ،دنیاکی سب سےبڑی بیٹری سےچلنے والی کاراورآن لائن سیلزکمپنی کےمالک اورموجدہیں۔ https://t.co/cL8HwlN2Gd	Any parent, teacher, ruler, politician, judge, general, civil society contractor will tell you why no Bill Gates, Alan Musk and Jeff Bezos have been born in Pakistan for 75 years? It's not just billionaires, but the owners and inventors of Microsoft, the world's largest battery-powered car and online sales company, respectively. https://t.co/cL8HwlN2Gd	NIL	NIL	No_Hate
1567180949699366915	عظیم خان بلور و ثمر ہارون بلور این اے 31 کے ضمنی الیکشن کے سلسلے میں موچی لڑہ بازار میں کمپین کرتے ہوئے @Khadimhussain4 @SamarHBilour @AsgharNawazKha2 https://t.co/5wWSQstrFg https://t.co/tg8p2VNlXt	Azeem Khan Bilor and Samar Haroon Bilor campaigning in Mochi Lala Bazar in connection with NA 31 by-election. @Khadimhussain4 @SamarHBilour @AsgharNawazKha2 https://t.co/5wWSQstrFg https://t.co/tg8p2VNlXt	NIL	NIL	No_Hate
1573240150762602496	انشاءاللہ ہفتے کی شام 4بجے چئیرمین تحریک انصاف عمران خان رحیم یارخان میں جلسہ عام سے اہم خطاب کریں گے جلسے کی ملک بھر میں اہم مقامات پر سکریننگ کی جائے گی @ImranKhanPTI @Muhamma27078945 #Rahimyarkhanjalsa #Rykjalsa #سرخرو_ہوا_کپتان #IKHopeOfPakistan #ڈٹ_کے_کھڑاہے_کپتان #PTI https://t.co/Q5apDgCdF0	InshaAllah, Chairman Tehreek-e-Insaf Imran Khan will address a public meeting in Rahim Yar Khan at 4 pm on Saturday. The Jalsa will be screened at important locations across the country @ImranKhanPTI @Muhamma27078945 #Rahimyarkhanjalsa #Rykjalsa #Red_Air_Captain #IKHopeOfPakistan #Dt_k_khadahe_kapatan #PTI https://t.co/Q5apDgCdF0	4 ربروزہفز شام 6 بے اکستان تحریک انصاف جو اب	4th Friday at 6 p.m Pakistan Tehreek-e-Insaf which now	No_Hate
1567613354222522368	@ZafarNaqviZN اس مکار لومڑی کی جگہ تاحیات جیل ہے۔ https://t.co/IMAR1VSAst	@ZafarNaqviZN life in jail for this sly fox. https://t.co/IMAR1VSAst	7 ت' اع ایک میں کپڑ گا تی ووٹ میں کچ ڑک گی قظرل خا یں پچڑی گ لی آڈیو میس کچڑی گی کیرک وٹ میں ڑل گا رانا شمیم خط میں کپچڑی گن ٰ ری 3 یا پکعای سں گے کل پھ۰لْ ہیں وائے بجھوٹے بیاںن میس پڑ ‎٠‏ گا یوں پر ووٹ راغ ہوۓ ڑگ گی	7 A cloth in one You will be spoiled in the vote Qazral Khan left behind Le audio mess will be crushed Carrick will turn into a wit Rana Shamim in a letter to Kapchidi Gun Re 3 or Pikaai will sing tomorrow There are no statements On this, the vote will be taken	Hate
1593852158683844608	جس دور میں آپ لوگوں کو پرکھنا مشکل ہو جائے کہ ہم کیسے پرکھے کے حق پر کون ہے ؟؟؟ تو فرمایا پھر یہ دیکھنا کہ کافر کس سے ڈرتا ہے ! اس دور میں کافر اگر کسی سے لرزتا ہے تو وہ اس مرد مجاہد سے جو بیھٹا تو وہیل چیئر پر ہے پر اس سے لرزتا پورا عالم کفر ہے! #Urs_E_BabaJan #نوائےسحر https://t.co/3iNkdp9Gtu	In the era when it becomes difficult for you people to judge, how can we judge who is right? So he said, then see who the infidel is afraid of! In this era, if a disbeliever trembles from someone, then it is from this man Mujahid who is sitting on a wheelchair, but the whole world that trembles from him is disbelief! #Urs_E_BabaJan #نوايسحر https://t.co/3iNkdp9Gtu	NIL	NIL	No_Hate
1565737673851109377	خوابوں کی تلاش میں نکلنے والا شامی پناہ گزین تفصیل پڑھیں: https://t.co/X55u4zbaGm https://t.co/44v0Xr46Vn	A Syrian refugee in search of dreams Read details: https://t.co/X55u4zbaGm https://t.co/44v0Xr46Vn	NIL	NIL	No_Hate
1573553602358034432	پس ثابت ہوا کہ ایک ایماندار اور اچھی شخصیت کا حامل شخص ہی خارجی محاذ پر ملک کا مقدمہ بہترین انداز سے لڑ سکتا ہے۔ #سلام_شہباز https://t.co/gQ6HluYEUv	So it was proved that only an honest and good person can fight the case of the country in the external front. #Salaam_Shahbaz https://t.co/gQ6HluYEUv	ران ا زییاٛس جھ بائیڈن کےفون کے لیے تزستاد ا ای ج با میڈ نکی وز یرٹلم شب بانشریف ےخوشگوارموڈ ٹیس ملا قات ۶ ۶ 9ئ“ خارجیماز پر پاکستا نکامقدم ہہت رب ری اکنا ہے۔	Ran a ziyaٛs jh for biden's phone Tazstad Aejba Mad Niki Wazirtalm Shab Bansharif Happy mood teas meeting 6 6 9 The Lord is recognised.	No_Hate
1563848798945902592	افغان وزیر دفاع بول رہا ہے پاکستانی فضائی حدود سے امریکی ڈرون افغانستان میں داخل ہو رہے ہیں #عمران_خان_ٹیلی_تھون_مہم #پیمرا_شرم_کرو https://t.co/vp2YEcNXc3	The Afghan Defense Minister is speaking. American drones are entering Afghanistan from Pakistani airspace #Imran_Khan_Telethon_Campaign #Shame on you https://t.co/vp2YEcNXc3	NIL	NIL	No_Hate
1607495900989132801	دنیا کی تاریخ کا سب سے بڑا ڈاکا ڈالا گیا ان تینوں بدشکلوں نے ملک خزانے پر ۔ اللہ پوچھے گا ان کو لانے والوں سے #امپورٹڈ_سرکار_تباہی_سرکار https://t.co/RKNUn44jX0	The biggest robbery in the history of the world was done by these three miscreants on the national treasury. Allah will ask those who bring them #imported_government_destruction_government https://t.co/RKNUn44jX0	ا او 0۳ 90 بت- "21" ص٦‎ کسون جواابد ےگا لا ان	A Oh 03 90 idols- "21" p.6 Who will answer? bring in	Hate
1565772721174335490	مطلب انڈیا والے اپنے ماں کو بھی نہیں چھوڑتے۔ کس قدر شرمناک فعل کا ارتکاب کیا گیا ہے, یہ حرکت اگر کسی مسلمان نے کی ہوتی تو ابھی تک دنگے فساد شروع ہو چکے ہوتے۔.... https://t.co/MvXs8AMfds	Meaning Indians don't even leave their mother. What a shameful act has been committed, If this act had been done by a Muslim, riots would have started by now.... https://t.co/MvXs8AMfds	پھارت : شہ ر کین عا کا کن ےکوز ادا گر کے بارڈالا	Farat: Some of the city's main attractions are Bardala	Hate
1573208170863919104	@hinaparvezbutt اب بازار میں طوائفیں بھی سیاست کر رہی ہیں ان کو کیا پتہ لیڈر کون ہے اور گیدڑ کون ہیں جو ان پے پیسے اور ان کا مجرا کرائے وہ لیڈر اور جو ان کو سمجھائے وہ گیدڑ جاؤ کہیں اور جا کہ محفل جماؤ یہاں کوئی کام نہیں طوائفوں کا #عمران_خان_بچائےگا_پاکستان https://t.co/o652tWVmej	@hinaparvezbutt now the prostitutes are also doing politics in the market, what do they know who is the leader and who are the jackals who give them money and their money, the leader and the one who explains them is the jackal, go somewhere else, go and have a party, there is no work here. Not prostitutes #Umran_Khan_will_save_Pakistan https://t.co/o652tWVmej	NIL	NIL	Hate
1606631001526046720	@hinaparvezbutt کیا اس قاتل چور لٹیرے اشتہاری مجرم فراڈیا کی بات کررہی ہو جو تین سال پہلے پانچ ہفتے کی ضمانت پر بیماری کا ڈرامہ کرکےلندن بھاگ گیا تیس سال سے ملک کو لووٹنے والا چور قاتل دھشت گرد تین دفعہ حکومت سے نکالا گیا اب واپس آیا تو اس بھگوڑے چورلوعوام پھانسی پر چڑھائی گی https://t.co/FCVCsyQRBn	@hinaparvezbutt Are you talking about this murderer, thief, robber, advertising criminal Faradia, who escaped to London by feigning illness for five weeks bail three years ago? This fugitive will be hanged https://t.co/FCVCsyQRBn	یہ بیٹھا سے وہ فراڈیا شس نے قفرض امارو لک سنوارو کے نام پر پورے پاک٥تان‏ کو لوٹا.. کلک و نا سخورا الب 2 اولاه اسٰ 58 ٥ہہ‏ ہمز ٥دوولدم‏ حص3ج د۲/7٣‏ ۲۳۰۲۰1۲	He sat down and looked at him In the name of Sanwaro, the entire Pak5tan was looted.. Click and no Sukhora Alb 2 Olah Asa 58 Part 3C D2/73 2302012	Hate
1593634674437492737	طالبان نے انجینٸرنگ کی دنیا میں اپنا پہلا شاہکار لانچ کردیا۔ یہ جدید اور انوکھے انداز میں ڈیزاٸن کردہ افغانستان کی پہلی کار زوردار طمانچہ ہے ان دیسی لبرلز کی منہ پر جو کہتےتھے اسلام ترقی کی راہ میں حاٸل ہے اور امارت اسلامی افغانی قوم کو پتھروں کے دور میں پہنچا دے گی۔ @Mati https://t.co/shvCyUYWeU	Taliban has launched its first masterpiece in the world of engineering. This modern and uniquely designed first car of Afghanistan is a strong slap in the face of those indigenous liberals who said that Islam is an obstacle in the way of development and the Emirate of Islam will bring the Afghan nation to the stone age. @Mati https://t.co/shvCyUYWeU	NIL	NIL	Hate
1578747486063431681	#خاتم_النبیین_محمدﷺ لاَ اِلٰہَ اِلَّا ﷲُ مُحَمَّدٌ رَّسُوْلُ ﺑِﺴْﻢِ ٱﻟﻠَّﻪِ ٱﻟﺮَّﺣْﻤَٰﻦِ ٱﻟﺮَّﺣِﻴﻢِ حضرت محمدﷺ نے فرمایا ! (سچا) مسلمان وہ ہے جس کے ہاتھ اور زبان (کے ضرر) سے مسلمان محفوظ رہیں۔ مہاجر وہ ہے جو اُن کاموں کو چھوڑدے جن سے ﷲ نے منع کیا ہے۔ https://t.co/2GmKJ7wWrM	#Khatim_ul-Nabieen_Muhammad ﷺ There is no god but Allah, Muhammad is the Messenger. ٱﻟﺮَّﺣْﻤَٰﻦِ Hazrat Muhammad (peace be upon him) said! A (true) Muslim is one from whose hand and tongue (harm) Muslims are protected. A Muhajir is one who abandons the deeds that Allah has forbidden. https://t.co/2GmKJ7wWrM	NIL	NIL	No_Hate
1577996440277852162	پشاور کے حسن خیل میں گزشتہ دنوں فوجی قافلے پر حملے کو ناکام بناتے ہوئے متعدد دہشتگردوں کو موقع پر ہلاک کیا۔تاہم ان دہشتگردوں کے ممکنہ سہولت کاروں کے خلاف سرچ آپریشن میں اج مزید تین دہشتگردوں کو ہلاک کیا،سیکیورٹی فورسز ملک بھر سے دہشت گردی کو ختم کرنے کیلئے پرعزم ہیں۔ https://t.co/s6Nb0qX6io	In Hasan Khel of Peshawar last few days, many terrorists were killed on the spot by thwarting the attack on the military convoy. However, in the search operation against the possible facilitators of these terrorists, three more terrorists were killed. are determined to end https://t.co/s6Nb0qX6io	NIL	NIL	No_Hate
1566727851407056896	اطلاعات کے مطابق خود کش بمبار نے روسی سفارت خانے کے گیٹ پر خود کو دھماکے سے اڑا لیا مزید پڑھئے: https://t.co/WOdyY1xEnX #ExpressNews https://t.co/axyhDKqzUn	According to reports, the suicide bomber blew himself up at the gate of the Russian embassy Read more: https://t.co/WOdyY1xEnX #ExpressNews https://t.co/axyhDKqzUn	کیل میں داک2 رو ی سفارگڑکاروں سمیت 20 افراد ملاک	Dak 2 Rui Safargardkaron in Kiel 20 people including Malak	No_Hate
1578059371770253313	یہ بیغیرت لوگ ہیں جنکی وجہ سے آج تک ہمارے سروں پر زرداری اور شریف ڈاکو سوار ہیں جن لوگوں میں برے کو برا کہنے کی ہمت نا ہو وہ بیغیرتی سے بھی پرلے درجے پر فائز ہیں #happybirthdayimrankhan https://t.co/F9CnVRUW2m	These are unscrupulous people because of which Zardari and Sharif bandits are riding on our heads till date People who do not have the courage to say bad things are even higher than the level of dishonesty #happybirthdayimrankhan https://t.co/F9CnVRUW2m	NIL	NIL	Hate
1573974856911228928	@Rehanja04205976 ہاں جی تیرے جیسوں کی تو یہی خواہش ہے کہ عمران نیازی یہودی قادیانی زندیق مغرب کا پالتو کتا دھرنے کی کال دے اور تو اپنی باجیيو ں کو لے کر پہنچ جائے نچانے۔ https://t.co/Z1STnjNo52	@Rehanja04205976 Yes, that's what people like you want, that Imran Niazi, the pet dog of the Jewish Qadiani Zandiq Maghrib, should call for a sit-in and then come with your dogs and dance. https://t.co/Z1STnjNo52	تراروں تجریکوں می بہنوں نے اپے بھائی قربان کے گر تحریک انصاف وہ واعد تح یک سے جس جس بھائیوں نے ایت بجنوں کی عزتیں قربان کی۔	My sisters have sacrificed their brothers If Tehreek-e-Insaf has promised that The brothers who sacrificed the honor of the people.	Hate
1581327802842112001	@DrMk786 شوباز کی محبوبہ https://t.co/BVeJRRyPNP	@DrMk786 Shobaaz's beloved https://t.co/BVeJRRyPNP	NIL	NIL	No_Hate
1608381910790684672	جن دروازوں کے کھلنے کا آپکو شدت سے انتظار ہے، ہو سکتا ہے وہ اتنے کھوکھلے ہوں کہ کھلتے ہی ٹوٹ جائیں وَ عَسٰۤى اَنْ تُحِبُّوْا شَیْــٴًـا وَّ هُوَ شَرٌّ لَّكُمْؕ عین ممکن ہے جو چیز تمھیں پسند آرہی ہے وہ تمھارے حق میں بری ہو البقرہ:(216) https://t.co/zJlulfPWCw	The doors you desperately wait to open may be so hollow that they break as soon as they open. And God forbid that you love anything, and it is evil for you. It is possible that what you like is bad for you Al-Baqara: (216) https://t.co/zJlulfPWCw	NIL	NIL	No_Hate
1617833147512786944	شیخ مجیب نے اپنی قوم کو قبضہ مافیا پراپرٹی ڈیلر گندی ویڈیوز کی انڈسٹری سے بہت پہلے بچا کر ہیرا کا کردار ادا کیا ورنہ آ ج وہ بھی بیچارے ہماری طرح ذلیل ہو رہے ہوتے https://t.co/iRZqHKnqfp	Sheikh Mujib played the role of Hera by saving his nation from the occupation mafia property dealers dirty videos industry long before. Otherwise, those poor people would have been humiliated like us https://t.co/iRZqHKnqfp	اصل مر دفو یب الر مان تھاء یں نے تی قو مکوقہن افا؛ پاپل ٹارزاوردی وڑوز کی انڈسٹری سے بمت پل با یا۔ ‏	The original Mardifo Yab Ulrman Thaya te qo mkuqahan ifa; Papal Tarzavardi Voodoo From industry ,	Hate
1567919308092706818	میں اندھیرے میں اکیلی ہی نہ مرجاوں کہیں مجھ کو مرنے سے بچاو بابا (ع) قیدِ تنہایی میں دم گھٹنے لگا ہے میرا #تسکین_قلب_حسین_سکینہ Hashimite Princess Ruqaiyah bint AlHussain https://t.co/o95kFBzZNN	I alone in the dark Do not die Save me from death Baba (AS) I am suffocating in solitary confinement #Taskeen_Qalb_Hussain_Sakeena Hashimite Princess Ruqaiyah bint AlHussain https://t.co/o95kFBzZNN	م3 وہ٥‏ م_(ہادد٭ں 5ئ	M3 He5	No_Hate
1580891371900399618	قوم مافیا کو مسترد کر چکی ہے حقیقی آزادی کیلئے بیدار ہوچکی ہے۔ قوم اپنی خوداری و خودمختاری کی خاطر 16 اکتوبر کو بلے پر ٹھپہ لگانے کے ساتھ ساتھ اپنے ووٹ کی حفاظت بھی کریں یہ چور ڈاکو اور ان کے ہینڈلر اور ان کے سہولت کار پہلے کی طرح اب بھی آپ کو ووٹ چوری کرنے کی کوشش کریں گے۔ https://t.co/uwjtn2OXm9	The nation has rejected the mafia and has awakened to real freedom. Nation for its independence and sovereignty Protect your vote as well as stop the bat on October 16. These crooks and their handlers and their facilitators will still try to steal your vote like before. https://t.co/uwjtn2OXm9	NIL	NIL	Hate
1593165592093028352	سیاسی معاملات میں تحمل کا مظاہرہ کررہے ہیں:#چیف_جسٹس_پاکستان احتجاج کا حق لامحدود نہیں، آئینی حدود سے مشروط ہے، اگر واضح طور پر آئینی خلاف ورزی کا خطرہ ہو تو عدلیہ مداخلت کرے گی:#جسٹس_عمر_عطا_بندیال https://t.co/y4R0y1HgFJ	Showing restraint in political matters: #Chief_Justice_of_Pakistan The right to protest is not unlimited, subject to constitutional limits, if there is a clear threat of constitutional violation, the judiciary will intervene: #Justice_Omar_Atta_Bandial https://t.co/y4R0y1HgFJ	NIL	NIL	No_Hate
1561664190338695170	@ImranKhanPTI پہ دہشتگردی کا مقدمہ درج کرنا پاکستان کی غیور اور محب وطن عوام کی توہین ہے۔سیاسی بحران کم ہونے کے بجائے بڑھ رہا ہےمہنگائی کا طوفان بد سے بدتر ہو رہا ہے۔ملک کو شدید ترین نقصان پہنچ رہا ہے،طاقت کے استعمال سے معاملات مزید خراب ہوں گے۔ #BehindYouSkipper https://t.co/OPH6aQHuTC	Filing a terrorism case against @ImranKhanPTI is an insult to the zealous and patriotic people of Pakistan. The political crisis is increasing instead of decreasing. The inflationary storm is getting worse. Things will get worse. #BehindYouSkipper https://t.co/OPH6aQHuTC	۱ مز راہ |لشت رامک اھ ندپھہمنزرل سے بازآ ے اورندہم نے رتخابرلا	1 mz The way Nandham came back from Manzral and Nandham told Ratkhabarla	No_Hate
1580869745607602176	جو پاکستان میں ہے ہی نہیں جو پاکستان کی عدالتوں کا بھگوڑا ہے جس کے بیٹے پاکستانی شہری ہی نہیں جس کی جائیدادیں پاکستان میں نہیں ن لیگ کی سوشل میڈیا ٹیم اس کے نام پر پاکستانیوں سے ووٹ مانگ رہی ہے کھوتا بریانی کھانے کے سائیڈ ایفکٹس #VoteForBat https://t.co/fGKIVA8gI8	Which is not in Pakistan Who is a fugitive from the courts of Pakistan Whose son is not a Pakistani citizen whose properties are not in Pakistan The social media team of PML-N is asking Pakistanis to vote on his behalf Side Effects of Eating Khota Biryani #VoteForBat https://t.co/fGKIVA8gI8	5 ہ۳٦۰‏ 5 ٹ_نواز دا	5 H360 5 T_ Nawaz da	Hate
1608092725701640193	شمالی وزیرستان/ میرعلی خودکش حملے میں دو سیکیورٹی اہلکاروں کے ہلاک ہونے کی اطلاع ہے، https://t.co/VSGp70x7Et	North Waziristan/Mir Ali suicide attack: Two security personnel reportedly killed, https://t.co/VSGp70x7Et	NIL	NIL	No_Hate
1578034231112249344	پی ٹی آئی کے رکن صوبائی اسمبلی ہشام انعام اللہ نے فواد چوہدری کے پٹھانوں سے متعلق حالیہ بیان پر ان سے معافی کا مطالبہ کردیا۔ پی ٹی آئی رکن ہشام انعام اللہ نے ایک بیان میں کہا کہ فواد چوہدری نے پٹھان سے متعلق مذاقاً جو کہا کہ اسے پٹھان قوم کی توہین سمجھتا ہوں، https://t.co/XRGsdsuTJB	PTI Member Provincial Assembly Hisham Inamullah demanded an apology from Fawad Chaudhry for his recent statement regarding Pathans. PTI member Hisham Inamullah said in a statement that Fawad Chaudhry's joke about Pathans is an insult to the Pathan nation, https://t.co/XRGsdsuTJB	NIL	NIL	No_Hate
1617191177719058433	کیلیفورنیا میں فائرنگ کے نتیجے میں 10 افراد ہلاک اور دیگر زخمی! امریکی ریاست کیلیفورنیا میں چینی سال نو کی تقریبات کے مقام کے قریب مونٹیری پارک میں فائرنگ کے واقعے میں 10 افراد ہلاک اور 9 زخمی ہوگئے🔥 https://t.co/Gdvzvjum1X	As a result of the shooting in California, 10 people were killed and others were injured! 10 people were killed and 9 injured in a shooting incident in Monterey Park near the site of Chinese New Year celebrations in the US state of California🔥 https://t.co/Gdvzvjum1X	NIL	NIL	No_Hate
1593191934230945792	@Hooria_jani @shazbkhanzdaGEO یے زندگی کتے والی جھوٹا عدالت جاٸے گا پتا لگجاٸے گا https://t.co/BQXv1gpUuW	@Hooria_jani @shazbkhanzdaGEO Yes life dog liar will go to court and find out https://t.co/BQXv1gpUuW	NIL	NIL	Hate
1573655455301263361	جج : آخری خواہش بتاو؟ مجرم : کوئی غیرت مند PDM والا دیکھنا چاہتا ہوں جج: بہت چالاک ہو ساری زندگی جینا چاہتے ھو🤪😉 https://t.co/a4ePPSuO1j	Judge: Tell me the last wish? Criminal: Want to see someone with a jealous PDM Judge: You are very clever, you want to live all your life 🤪😉 https://t.co/a4ePPSuO1j	NIL	NIL	Hate
1593629136588836864	وزیر خارجہ بلاول بھٹو زرداری کی سیکرٹری خارجہ جوہر سلیم کے ہمراہ میڈیا سے گفتگو دفتر سنبھالنے کے بعد بہت مشکل چیلنجز کا سامنا کیا,ایک اصول رکھا کہ ہرملک سے باعزت اور عاجز طریقے سے رابطہ رکھا, جس طریقے سے پاکستان کی خارجہ پالیسی کو لے کر بڑھ رہے ہیں اس کا مثبت اثر ہوا ہے https://t.co/6Xla5SV7t5	Foreign Minister Bilawal Bhutto Zardari along with Foreign Secretary Johar Saleem talks to the media After assuming the office, he faced very difficult challenges, he kept a principle that he kept in touch with every country in a respectful and humble manner, the way in which he is developing Pakistan's foreign policy has had a positive effect https://t. co/6Xla5SV7t5	NIL	NIL	No_Hate
1573958182367535105	پٹواریو مان جاؤ!!!! یہ شیر نہیں کتا ہے https://t.co/CeJokGUeeC	Believe Patwari!!!! It's a lion not a dog https://t.co/CeJokGUeeC	NIL	NIL	Hate
1614505321216770049	#Qasim_Ali_Shah بکری کی ماں کب تک خیر منائے گی..... آج یہ بندر بھی اپنے کرتب سمیت ڈرٹی ہیری گیم کا نظر ہوگیا https://t.co/zI0OxNoDmW	#Qasim_Ali_Shah How long will the goat's mother celebrate.... Today this monkey also became the sight of Dirty Harry game with his tricks https://t.co/zI0OxNoDmW	NIL	NIL	Hate
1580160711921381376	پنجاب کے نئے وزیر داخلہ عمر سرفراز چیمہ 🔥🔥🔥 #آزادی_مارچ_کپتان_کے_سنگ https://t.co/7VtDkJNrWJ	The new Home Minister of Punjab Umar Sarfraz Cheema 🔥🔥🔥 #Azadi_March_Captain_K_Sing https://t.co/7VtDkJNrWJ	3 نما مجر و (اہور ۱ - اجب ہت ان شیی ہآ ڈیو لس کے ذر یع یھ بد نا مکرن ےک کو شش بری رع ناکام ہو جا ےگیء شوکمت تق کن 2 2022 ےہ 12 وہ ر158 ۶۲5+ ب۸۷ ۷مم بی 13۸8۸۸۸۷ 3 باعوەں ۲ 8٤ح8‏ ك۸ نافع ۸۸ع ع ں0 800510۲	3 Nama Mujar wa (Ahur 1 - Ajab Hat By means of these devils, one's evil deeds will fail. 2 2022 12 He R158 625+ B87 7mm B 13888887 3 Baawan 2 84H8 K8 Nafi 88A A 0 8005102	No_Hate
1558105966318600194	پاکستان کے صوبے خیبرپختونخوا کے ضلع سوات میں کالعدم تحریک طالبان پاکستان (ٹی ٹی پی) کی واپسی کی اطلاعات کے بعد قانون نافذ کرنے والے ادارے متحرک ہوگئے ہیں۔ ضلع کے مختلف داخلی و خارجی راستوں پر پولیس کی چیک پوسٹس قائم کردی گئی ہیں۔ https://t.co/xC331iwLKq	Law enforcement agencies have been mobilized after reports of the return of the outlawed Tehreek-e-Taliban Pakistan (TTP) in Swat district of Khyber Pakhtunkhwa province of Pakistan. Police check posts have been set up at various entrances and exits of the district. https://t.co/xC331iwLKq	NIL	NIL	No_Hate
1587470637890764801	ٹی ٹوئنٹی ورلڈ کپ: نیوزی لینڈ کو انگلینڈ کے ہاتھوں شکست، گروپ ون میں صورتِ حال دلچسپ تفصیل پڑھیں: https://t.co/Apqv6ZCWtR https://t.co/hYV0qh9mqJ	T20 World Cup: New Zealand defeated by England, interesting situation in Group One Read details: https://t.co/Apqv6ZCWtR https://t.co/hYV0qh9mqJ	NIL	NIL	No_Hate
1578059043041583107	یہ بھی شکر ہے عمران خان نے کیک میں سے اپنا سلائس اٹھانے کے بعد باقی کیک پر پیشاب نہیں کر دیا. کپتان جیسے گھٹیا آدمی سے کچھ بعید نہیں. https://t.co/Rb51XaCP9N	It is also thankful that Imran Khan did not urinate on the rest of the cake after taking his slice from the cake. Not far from a scumbag like the captain. https://t.co/Rb51XaCP9N	NIL	NIL	Hate
1563550195358797827	آج 26 آگسٹ کے موقعے پے سندھ ایگریکلچر یونیورسٹی ٹنڈو جام بلوچ پشتون سٹوڈنٹ کونسل اور سندھ سٹوڈنٹ کونسل ۔ شہید نواب اکبر خان بگٹی کا دنیا کے عظیم لیڈر اور بلوچ قوم پرست رہنما شہید نواب محمد اکبر خان بگٹی کی أج 16 ویں برسی کے موقع پر #ShaheedNawabAkbarBugti https://t.co/cqnhMGn6KU	Today on the occasion of August 26 Sindh Agriculture University Tando Jam Baloch Pashtun Student Council and Sindh Student Council. of Shaheed Nawab Akbar Khan Bugti Today on the occasion of the 16th anniversary of the world's great leader and Baloch nationalist leader Shaheed Nawab Muhammad Akbar Khan Bugti. #ShaheedNawabAkbarBugti https://t.co/cqnhMGn6KU	NIL	NIL	No_Hate
1580146948710883328	@HamidMirPAK آج رانا بندر سے اس پر بھی سوال ضرور کرنا https://t.co/521pcvU0hb	@HamidMirPAK Must ask Rana Bandar about this today too https://t.co/521pcvU0hb	تی ہاں و تعاقات ہیں	Yes, there are relationships	Hate
1593702702252527619	دنیا کا منافق اور غلیظ ترین انسان ڈیزل خبیث ابلیس بیشمار لعنت بھیج کر ریٹویٹ کریں https://t.co/zDRX3U7aV2	The hypocrite and dirtiest person in the world Retweet Diesel Khabis Iblis with many curses https://t.co/zDRX3U7aV2	001 پک اکتاولامرااصان منرہون چا ے! الزڈ اترتا توہقامت کک سو تتے ری جےکہ ائٹاس کک می ںکیسا ے؟	001 Puck Oktavlam Marasan Munrhun! Alzd would come down Tohqamat cook so tate rejkek itas cook me?	Hate
1615659405273628672	آپ فیس بک واٹس ایپ ٹویٹر اور کسی دوسری سوشل سائٹ پر کسی کے ساتھ چاہے دس سال بھی ایڈ رہیں آپ کا تعلق ایک انفرینڈ یا بلاک کی مار ہے بس https://t.co/25oPOe7bFZ	You can stay in touch with someone on Facebook, WhatsApp, Twitter and any other social site even for ten years You belong to an unfriend or block just https://t.co/25oPOe7bFZ	NIL	NIL	No_Hate
1592382215933263872	یہ اللہ میرے ہونے والا مجازی خدا کنجوس نہ ہو آمین🤭🤣 https://t.co/ySN6YM6UuP	May Allah be my virtual god, don't be stingy Amen🤭🤣 https://t.co/ySN6YM6UuP	NIL	NIL	No_Hate
1612752935884128257	آدم کے کسی روپ کی تحقیر نہ کرنا پھرتا ہے زمانے میں ُخدا بھیس بدل بدل کر https://t.co/LrNxD62BDg	Do not despise any form of Adam God walks in time disguised https://t.co/LrNxD62BDg	NIL	NIL	No_Hate
1566655948235718656	@ImranKhanPTI رجیم جینج والے پہلوانوں حلال رزق کا مطلب کسان سے پوچھو پسینہ بن کے بدن سے لہو نکلتا ہے مفت کھانے کا مطلب ان مولویوں سے پوچھو چربی بن کے بدن سے بھینس والی پیٹ نکلتا یے https://t.co/7mpWgeKswW	@ImranKhanPTI Regime Jinj wrestlers Ask the farmer the meaning of halal sustenance Blood comes out of the body of sweat Ask these clerics what free food means A buffalo belly comes out of a fat bun's body https://t.co/7mpWgeKswW	NIL	NIL	Hate
1564951424848592899	کراچی : قبرستان میں گزشتہ روز دفنائی گئی نومولود بچی کی لاش قبر سےغائب کراچی : محمد شاہ قبرستان میں گزشتہ روز دفنائی گئی نومولود بچی کی لاش قبر سےغائب ہوگئی ، پولیس گورکن کو حراست میں لے لیا۔ تفصیلات کے مطابق کراچی کے علاقے نارتھ کراچی محمد شاہ قبرستان سے گزشتہ روز دفنائی… https://t.co/7Cee4BoZQq	Karachi: The body of a newborn girl who was buried in the cemetery yesterday has disappeared from the grave KARACHI: The body of a newborn girl who was buried in the Muhammad Shah cemetery yesterday disappeared from the grave, the police took Gurkan into custody. According to the details, he was buried yesterday at North Karachi Muhammad Shah Cemetery in Karachi... https://t.co/7Cee4BoZQq	NIL	NIL	No_Hate
1566082606910918658	الٹی شلوار پہننے والے خبیث بڈھے کی دھمکیاں سننے کے بعد😂😂🤣🤣 باجوہ صاحب：👇 https://t.co/qtdRBqhc1R	After listening to the threats of Khabis Badhe who wears vomit shalwar 😂😂🤣🤣 Bajwa Sahib: 👇 https://t.co/qtdRBqhc1R	NIL	NIL	Hate
1593601082613268481	@sarangfateh987 @BhiMosa @iVeenaKhan نون لیگ کا سپوٹر بننے کے لیے کئی مشکل مرحلوں سے گزرنا پڑتا ھے جیسا کے جہالت کے اندھیروں میں گم ھونا کھوتا بریانی کھانا کتے کو شیر کہنا گدھے کو لیڈر سمجھنا تب جا کر ایک مکمل پٹواری تیار ھوتا ھے کیوں پٹواری 😂Goonglo https://t.co/C18Ayk3LRZ	@sarangfateh987 @BhiMosa @iVeenaKhan To become a non-league spotter, one has to go through many difficult stages like getting lost in the darkness of ignorance, eating biryani, calling a dog a lion, treating a donkey as a leader, then a complete Patwari is prepared. 😂Goonglo https://t.co/C18Ayk3LRZ	NIL	NIL	Hate
1566714717132947457	کوشش کریں کہ لوگوں کی روح کو زخمی نا کریں کیونکـہ جسم کے زخم کی ہزاروں دوائیاں، ہزاروں طبیب مِل جاتے ہیں مگر روح کے طبیب بازار سے نہیں ملتے. #اردو_زبان https://t.co/cV2eER7YFv	Try not to injure people's souls, because thousands of medicines and thousands of doctors are available for body injuries, but soul doctors are not found in the market. #Urdu_language https://t.co/cV2eER7YFv	NIL	NIL	No_Hate
1609036918133764096	روشنیوں کے شہر کراچی کو اندھیروں میں دھکیلنے کے لیے ہی ملٹری اسٹیبلشمنٹ نے MQM بنائی تھی۔ اور اب پھر سے کرپٹ کرنیل MQM کو کٹھا کرنے جارہے کراچی کو مزید برباد کرنے کے لیے۔۔۔ کاش کہ ہم نے اِن جرنیلوں کی جگہ اچھی نسل کے کتے پالے ہوتے۔۔😡😡 @TeamiPians #حقیقی_قائد_صرف_عمران https://t.co/tJBaFPcXSf	MQM was created by the military establishment to push Karachi, the city of lights, into darkness. And now the corrupt colonels are going to destroy MQM again to further ruin Karachi. I wish we had raised good breed dogs instead of these generals.😡😡 @TeamiPians #حقيقي_قاعد_زرب_عمران https://t.co/tJBaFPcXSf	کرات یقکاشر روشنیو ں کا شم رھ پھر لنٹ کوخیال آیاکہ مار پٹ ہی نے سرے خنڑے ش کر کے ای مکیوایم ہناد کید عشروں لگ ون بھی لکھیااگیڑ مکل ے جان مچوثٰ اب رخیال آرہا کہ تح رىیک انصا کو روکناے فو بارودکا ڈھیر بک ھکر کے شب میں چراغا کیک وش لکی	Countless lights then struck Lint Pitt shook his head and shouted at E.M.K.M Asharon Lag one also wrote, Makle Jan Machusta now A heap of gunpowder was coming to stop the attack In the night of Book Hacker, Chiragha cake was lucky	Hate
1593151354012254208	جنوبی وزیرستان میں محسود قبیلے کی ذیلی شاخ ماچھی خیل کے تین سردار ملک دوست خان محسود، ملک غوث خان اور نور محمد محسود کو نامعلوم مسلح افراد نے شہید کر دیا۔ انہیں ڈی آئی خان میں جرگے سے اپنے گھروں کو لوٹتے ہوئے شہید کیا گیا۔ https://t.co/Korqkk6tFm	Malik Dost Khan Mehsud, Malik Ghos Khan and Noor Muhammad Mehsud, three chiefs of Machikhel, a sub-branch of Mehsud tribe in South Waziristan, were martyred by unknown gunmen. He was martyred while returning home from Jirga in DI Khan. https://t.co/Korqkk6tFm	NIL	NIL	No_Hate
1594015711000637440	@hafeezullah_k حفیظﷲ نیازی صاحب نے جیو پراپنے پروگرام میں خلاف واقع بات کہی اصل بات یہ ہے کہ #بندیال_گینگ ملک دشمن مجرموں کا ایک شیطانی ٹولہ ہے جو پاکستان کی بنیادوں کو اکھاڑپھینکنے پر صیہونی سازش میں اہم شریکِ کار ہے- https://t.co/MCTnUGuiot	@hafeezullah_k Hafizullah Niazi said the opposite thing in his program on Jio The bottom line is that the #Bandial_Gang is a diabolical group of anti-national criminals who are major contributors to the Zionist conspiracy to overthrow the foundations of Pakistan - https://t.co/MCTnUGuiot	NIL	NIL	Hate
1598972147870769152	اعظم سواتی کو بلوچستان کی دور دراز جیل میں بھیج دیا گیا ہے جس طرح انتہائی خطرناک دہشت گردوں کو گوانتاناموبے کی جیل میں بھیجا جاتا تھا، بتایا جا رہا ہے کہ مبینہ طور پر اعظم سواتی کی جان کو شدید خطرات لاحق ہیں۔ https://t.co/0RA5MnRobC	Azam Swati has been sent to a remote prison in Balochistan, just as the most dangerous terrorists were sent to Guantanamo Bay prison, it is being reported that Azam Swati's life is in serious danger. https://t.co/0RA5MnRobC	NIL	NIL	No_Hate
1593616151967399941	@piyreyLatiif @Zimeydar @jrnl_p @Khala_Hun @TARAR1220 @BITHANN @Shahzai726 @kamyanaRAJPOOT @Adams5General @saleemm13128562 @Askniazimwi @yusafzai313 بڑے بڑے دلے کے بچے دیکھے ہیں پر جو بغیرتی یہ بغیرت زمہ داری سے ادا کر رہا ہے ایسا بھڑوا پہلے کبھی نہیں دیکھا ہر چوتھا بندہ اس کے ماں کے قوسے میں تھوک رہا ہے اور یہ خوشی خوشی چاٹ رہا ہے وہ بھی زمہ داری سے https://t.co/74xoAngwV1	@piyreyLatiif @Zimeydar @jrnl_p @Khala_Hun @TARAR1220 @BITHANN @Shahzai726 @kamyanaRAJPOOT @Adams5General @saleemm13128562 @Askniazimwi @yusafzai313 I have seen children with big hearts but the one who is paying this without responsibility has never seen such a brat. The fourth guy is spitting in his mother's lap and happily licking it too responsibly https://t.co/74xoAngwV1	NIL	NIL	Hate
1564255826092601346	پیارے وطن کی تباہی کے اصلی زمہ دار ۔۔ مطمئن دلے ۔ https://t.co/705qKP2Vxu	The real responsible for the destruction of the beloved country. Satisfied. https://t.co/705qKP2Vxu	NIL	NIL	Hate
1614971080720134144	ہم اپنی فوج سے لازوال محبت کرتے ہیں کیونکہ ہماری فوج ہر مصیبت میں ہمارے لئے سر پر کفن باھندے کھڑی رہی ہے #باعزم_پاک_فوج https://t.co/OrvjpsMUOB	We love our army forever because our army has stood for us in every trouble #Baazim_Pak_Fuj https://t.co/OrvjpsMUOB	پاک فو نے پالتان وا کا ہو ارابنان کی خاطر ہہ موق پ یش مہات بااں دک ہیں۔ یس ۳ مو وٹ ہہ	Pak Fu ne paltan wa ka ho arabnan for sake Heh Moq Pesh Mahat Baan Dak. Yes, 3 months ago	No_Hate
1581310476243603457	یاد رکھنا ہمارا پر امن جلوس اس بار روکا گیا تو اور اس بار شل چلاے گیے میلاد کے جلوس پر تو یاد رکھنا منافق اعظم تجھے تیرا قادیانی ننیال اور یہودی سسرال یاد دلا دیں گے #اسلحہ_فروش_امریکہ_بےلگام https://t.co/PPmUBhxkNr	Remember, if our peaceful procession was stopped this time, and this time, on the Milad procession, remember, the great hypocrite will remind you of your Qadian nunial and Jewish father-in-law. #اسلہہ_فروش_امریکہ_Belgaum https://t.co/PPmUBhxkNr	۲۷۷۵1 1 8 "81001 مل 07 89	27751 1 8 "81001 Mill 07 89	Hate
1566501729750945797	@tamiz_sy برگر کھاؤ شہزادی https://t.co/oLN6u2Gswa	@tamiz_sy eat burger princess https://t.co/oLN6u2Gswa	NIL	NIL	No_Hate
1566053935697334272	پاکستان کا واحد شہر کراچی ھے جہاں رابطے کی زبان کے طور پر اردو استعمال ھوتی ھے۔ پاکستان بننے کے بعد ھمارے پلے اردو بولنے والے ھندوستانی مھاجر پناھگیر پڑے ' جنہوں نے پاکستان بنتے ھی پاکستان کی اصل قوموں بنگالی ' پنجابی ' سماٹ ' براھوئی کی زمین پر قبضہ کرکے https://t.co/598hLGckvc https://t.co/kRclQFtIjX	Karachi is the only city in Pakistan where Urdu is used as the language of communication. After the creation of Pakistan, our Urdu-speaking Indian refugees took refuge, who became Pakistan by occupying the land of the original nations of Pakistan, Bengali, Punjabi, Samat, and Brahui. https://t.co/598hLGckvc https://t.co/kRclQFtIjX	55:01:0007 نے ژابطے کی زبان کے طور پر اردو استعمال ھوتی ھے	55:01:0007 as the tongue of the tongue Urdu It is used	Hate
1598373516491239424	زندگی کوسہل بنانےکےلیےپتھرتوڑنےپڑتے ہیں۔ہاتھ زخمی ہوتےہیں'آگ کوبُجھانےکےلیےسمندر نہ آئےتوسمندر کو اُس کے حال پہ چھوڑ دو۔کبھی کبھار آگ کو بُجھانے کے لیے سمندر کی نہیں' ایک دو آنسووں کے قطروں کی ضرورت ہوتی ہےاور کبھی کبھار زندگی کےلیے روشنی لانےکو چراغ نہ ہو تو دل جلانا پڑتا ہے۔ https://t.co/v8Taejc2Wi	Stones have to be broken to make life easier. Hands are injured. "The sea doesn't come to put out the fire, so leave the sea alone. Sometimes the fire doesn't need the sea to put it out." So the heart has to burn. https://t.co/v8Taejc2Wi	NIL	NIL	No_Hate
1598011094932807680	@PTIofficial لنگڑا شیطان عمران چور نیازی واشل اعظم فسادی اعظم شیطان اعظم منافق اعظم https://t.co/tjnQIQxy6y	@PTIofficial Lame Satan Imran Thief Niazi Vashal Azam Rioter Azam Satan Azam Hypocrite Azam https://t.co/tjnQIQxy6y	NIL	NIL	Hate
1560623934525030400	.@SecBlinken: میں نے شمالی بحرِ اوقیانوس سے متعلق معاہدے کے بارے میں امریکہ کی توثیقی دستاویزات جمع کرا دی ہیں جو کہ امریکہ کی جانب سے @NATO میں فِن لینڈ اور سویڈن کی شمولیت کی توثیق کے عمل میں آخری اقدام ہے۔ https://t.co/0svGp2N9Uj	.@SecBlinken: I have submitted the US ratification of the North Atlantic Treaty which is the final step in the US ratification of Finland and Sweden joining @NATO. https://t.co/0svGp2N9Uj	NIL	NIL	No_Hate
1566737307180404736	سندھ کے سیلاب متاثرین کی امید صرف عمران خان سیلاب سے تباہ حال لوگ جو اپنا گھر مال مویشی زمینیں سب کھوچکے انہوں نے عمران خان کے سامنے اپنا دل کھول کر رکھ دیا انکی داد رسی کو کوئی نہیں عمران خان ہی انکے لئے کچھ کرے۔ سندھ کی امید عمران خان #InsafReliefProgram https://t.co/XR3TY83W8r	The hope of flood victims of Sindh is only Imran Khan. People who have lost their homes, property, cattle and land, they have opened their hearts to Imran Khan. Hope of Sindh Imran Khan #InsafReliefProgram https://t.co/XR3TY83W8r	NIL	NIL	No_Hate
1596156025870209024	کُھلتے نہیں نصیب اسیرانِ عشق کے. قسمت کے پیچ آپ کے بند قبا ہوئے… اِتنا بچاؤ بادۂ اُلفت سے اے حَسؔن. دُنیا میں آپ ہی تو نئے پارسا ہوئے… جناب. https://t.co/oymo5czYpF	The fortunes of captives of love do not open. The screws of fate are closed to you... Save me from the storm, O Hasan. You are the new Parsha in the world. Mr. https://t.co/oymo5czYpF	NIL	NIL	No_Hate
1559093115901939717	@najamwalikhan @mushtaqminhas یہ حرامی بھی صحافی ھے۔ایسے صحافی کوٹھوں سے سیدھا مافیا کے دربار میں اکے گرتے ہیں۔تیری اوقات یہ ھے https://t.co/I5x7uCdSXd	@najamwalikhan @mushtaqminhas This bastard is also a journalist. Such journalists fall straight from the dungeons to the court of the mafia. This is your time https://t.co/I5x7uCdSXd	NIL	NIL	Hate
1608296886984744961	چلو چلو یکم جنوری دو ہزار تئیس 01/01/2023کو جانی خیل امن جلسہ چلو کیونکہ آجکل کے دور میں دائمی امن ترقی اور خوشحالی کی اشد ضرورت ہے ۔سب پشتون ہاتھ جوڑ کے مشترکہ امن بحالی کیلئے کوششیں جاری رکھے۔ #ManzoorPashteenOurHero #ManzoorTheSymbolOfPeace #wewantpeace https://t.co/BGAStT84OF	Let's go to Janakhel Aman Jalsa on 1st January 2023 01/01/2023 because there is a dire need for permanent peace, development and prosperity in today's era. #ManzoorPashteenOurHero #ManzoorTheSymbolOfPeace #wewantpeace https://t.co/BGAStT84OF	NIL	NIL	No_Hate
1566423331255029762	خواتین و حضرات آپ کسی بھی عمر کے ہیں ہفتے میں دو تین بار سیکس ضرور کریں- نہ صرف صحت مند اور چاک و چوبند رہیں گے'درازی عمر کا راز بھی اسی میں ہے! https://t.co/1XZQieIyQQ	Ladies and gentlemen of any age, have sex two or three times a week. Not only will you be healthy and fit, the secret of long life is also in this! https://t.co/1XZQieIyQQ	NIL	NIL	No_Hate
1575794668494733312	@sayedzbukhari ابے ہیرا منڈی کی پیدائش زانی خان کے لونڈے بدبو دار بھنگی بد نسل انسان چمار خارشی کتے بھونک جتنا بھونک سکتا ہے کیوں کہ جب یہ شخص آئے گا تو تم سب حرامی بھونکنا بھول جاؤ گے کیوں کہ اس شخص کو تم جیسے کتوں کہ گلے میں پٹا ڈالنے کا فن خوب معلوم ہے #30thSepHyderabadMassacre1988 https://t.co/6wNAQiOtEK	@sayedzbukhari Abe born of Heera Mandi Zani Khan's stinky bhangi bad breed man Chamar scabbard dogs bark as much as they can bark because when this person comes you all will forget to bark bastards Because this person knows the art of putting a leash around the neck of dogs like you #30thSepHyderabadMassacre1988 https://t.co/6wNAQiOtEK	NIL	NIL	Hate
1574407753333874688	لندن میں مریم اورنگزیب سے سوال غیر مہذب رویہ ہے لیکن لاہور میں یاسمین راشد پر تشدد ایک تہذیبی روایات کی پاسداری ہے -دانشور لیگ https://t.co/Ajw7oOP3Ip	Questioning Maryam Aurangzeb in London is an uncivilized behavior, but violence against Yasmin Rashid in Lahore is a cultural tradition. -Intellectual League https://t.co/Ajw7oOP3Ip	NIL	NIL	No_Hate
1579354564842909696	@Beeper9999 مجھے بھی لگ رہا تھا کہ زندگی بہت بور چل رہی ہے 😔 کوئ adventure ہونا چاہیے اور پھر ہمارے گھر میں یہ آگیا🤣 پھر پتا چلا کہ کتنی پرسکون زندگی کو" جھنڈ "کر لیا میں نے 😢 https://t.co/ESi6T5Uo0T	@Beeper9999 I also thought that life is boring 😔 there must be some adventure and then it came to our house 🤣 then I realized how much I "flocked" a peaceful life 😢 https://t.co /ESi6T5Uo0T	NIL	NIL	No_Hate
1578645744143069184	@TariqJamilOFCL الحمدللہ مجھےفخر ہےکہ میں قائدنوازشریف اور شہبازشریف کا کارکن ہوں ۔جن کےخلاف آج تک کبھی کوئی آڈیو یا نازیبا ویڈیونہیں آئیں۔مگر اس ملک میں PTIکےایسے بےشرم بھی ہیں جو فحاشی کےاڈےگرم کرنےمیں ملوث ہیں اور اُن کے سپورٹر بھی پڑھےلکھےجاہل ۔اللہ اُن جاہلوں کی عقلوں کوحفظ وامان میں رکھے https://t.co/A6NxDXZgRr	@TariqJamilOFCL Alhamdulillah I am proud that I am a worker of Quaid Nawaz Sharif and Shehbaz Sharif. No audio or nasty video has ever come against them till date. But in this country there are shameless people of PTI who are involved in promoting obscenity and their supporters are also illiterate. Allah bless those ignorant people. Keep your wits safe https://t.co/A6NxDXZgRr	NIL	NIL	Hate
1608902784950362113	"اپنے اعمال میں اپنی نیت کو صاف کرنے کی کوشش کریں اور اپنے اعمال کو ہر قسم کے شرک حسد اور نفرت سے پاک کریں تاکہ آپ کو دونوں جہاں میں اجر ملے۔خدا ،اسلام اور امام کے احکام پر عمل کریں اس لیے کہ ہم جب تک خود کو نہ بنائیں اور نہ بدلیں معاشرہ نہیں بنتا۔ وصیت شھید ابراھیم ھادی⁦ https://t.co/tPHKVrfa5G	"Try to purify your intentions in your actions and purify your actions from all forms of shirk, jealousy and hatred so that you will be rewarded in both places. Follow the commandments of God, Islam and the Imam because when we Until you don't make yourself and don't change, society doesn't become. Wasit Shaheed Ibrahim Hadi https://t.co/tPHKVrfa5G	NIL	NIL	No_Hate
1581939675001856002	جو اب بھی اس نیازی دلے کو عاشق رسول کہتے ہیں تو سمجھ جائیں کہ وہ شخصیت پرست ہو چکے ہیں #خونی_درندہ_عمران_خان https://t.co/kMBBjnu6iv	Those who still call this Niazi Dala Ashiq Rasool should understand that they have become personalityists #Khooni_Dirndah_Imran_Khan https://t.co/kMBBjnu6iv	کا یں بت 0ں لا ےی	Of Bring idols	Hate
1567048937948717057	بےبس کوہستان اور بےبس کوہستانی یہ تصاویر کوہستانی اقوام کو اس ریاست کے اندر اپنی حیثیت اور وقار کو جانچنے کے لیے کافی ہیں۔ ہزارہ ڈویژن کا سب سے بڑا ضلع یوں بے یارو مددگار پڑا ہوا ہیکہ ایک ڈرپ لگانے کو بھی کوئی ڈاکٹر یا نرس میسر نہیں۔ کوہستانی اقوام نے ہمیشہ ریاست سے وفاداری https://t.co/05Xc2XQymW	Babes Kohistan and Babes Kohistani These images are enough for the Kohistani nations to assess their status and prestige within this state. The largest district of Hazara division is so helpless that no doctor or nurse is available to apply even a single drip. Mountain nations always loyal to the state https://t.co/05Xc2XQymW	NIL	NIL	Hate
1591863574980435972	@MemonaMushtaq @Murtzachan مرتضی ساحر کی بہن کے مموں کے بارے میں ایسی بات نا کرو، پورے محلے سے چدوا کر اتنے بڑے کیے ہیں🤣 اسکی دوسری بہن کے ممے بھی چیک کر گنجے گانڈو۔۔۔سارا خاندان بڑے مموں والا ہے https://t.co/Tts8Io7WJN	@MemonaMushtaq @Murtzachan Don't talk like that about Murtaza Sahir's sister's breasts, she has made them so big by teasing the whole neighborhood 🤣 Check her other sister's breasts too, you're bald. The whole family has big breasts https:/ /t.co/Tts8Io7WJN	NIL	NIL	Hate
1578786021999017984	انصاف، اور کرپشن کے خاتمے کی دعویدار حکومت تو ہر روز جلسے جلوسوں میں کرپشن فری پاکستان کی بات کرتے ہیں لیکن جب انکی حکومت کے خلاف ینگ ڈاکٹرز نے آواز اٹھائ تو وہ برا مان گئے ،کیونکہ یہ لوگ حقیقت سے بھاگتے ہیں، یہ اندر سے کچھ اور اور باہر سے کچھ اور #کرپشن_کا_بےتاج_بادشاہ https://t.co/fhA7QmRgTS	The government claiming justice and the elimination of corruption talks about a corruption-free Pakistan every day in jallas and processions, but when young doctors raised their voices against their government, they refused, because these people run away from reality, it is from within. Something else and something else from outside #Corruption_Ka_Beyta_Badshah https://t.co/fhA7QmRgTS	NIL	NIL	Hate
1580902542510555136	وانا / جنوبی وزیرستان رستم بازار وانا سے لاپتہ نوجوان کی لاش برآمد ، حافظ اللہ ولد قسمت قوم مغل خیل شاخ باراخونائی دو دن سے لاپتہ تھا ۔ آج علاقہ ڈوگ سے انکی لاش ملی ہے جس کو نامعلوم لوگوں نے قتل کرکے اسکی لاش کو تحصیل وانا کے علاقہ ڈوگ میں پھینک دیا گیا تھا https://t.co/cX89MqiFW8	Wana / South Waziristan The body of a missing youth was recovered from Rustam Bazar Wana. Today, his body was found in Doug area, which was killed by unknown people and his body was thrown in Doug area of ​​Wana tehsil https://t.co/cX89MqiFW8	NIL	NIL	No_Hate
1566620979652165632	جو مزہ انڈیا کی ہار میں۔۔ نہ عشق میں نہ پیار میں نہ دل میں نہ دلدار میں نہ موٹر میں نہ کار میں نہ گھر میں نہ بازار میں نہ باغ میں نہ بہار میں نہ سات سمندر پار میں نہ آم میں نہ انار میں نہ چٹنی میں نہ اچار میں نہ ہچکی میں نہ ڈکار میں نہ ٹیپ میں نہ وی سی آر میں 😜😜 #pakvsindia https://t.co/cB7tYp1SQ2	The fun in India's loss. Neither in love nor in love Neither in the heart nor in the heart Neither in a motorcycle nor in a car Neither at home nor in the market Neither in the garden nor in the spring Not across the seven seas Neither in mango nor in pomegranate Neither in sauce nor in pickle Neither hiccups nor belches Not on tape or VCR 😜😜 #pakvsindia https://t.co/cB7tYp1SQ2	NIL	NIL	No_Hate
1581166257537417218	اس وقت دنیا میں سب سے زیادہ بے قاعدہ، uncontrolled اور غیر مہذب ملک امریکہ ھے ۔ اس کے نزدیک انسانیت نام کی کوئی چیز نہیں۔ امریکہ بربریت اور درندگی کا نام ھے ۔ https://t.co/eI3y8kHn25	Currently, the most irregular, uncontrolled and uncivilized country in the world is America. For him, there is no such thing as humanity. America is the name of brutality and brutality. https://t.co/eI3y8kHn25	٦ امریکی صدرنے ڈیموکریٹک کانگریشن لکیمپی نکمیٹی میں خطاب کیا اورروس اورچی کا حواله دیتے پاکستا نکولپیٹ میں لیا/ فائل فولّو یمگائده“ ٹڈ کے تد واشنگٹن:امریکی صدرجوبائیڈن نے اپنی تقریرمیں پاکستان کاحوالە دیا۔ نمائندہ جیونیو زکے مطابق امریکی صدرنے ڈیموکریٹک کانگریشنل کیمپین کمیٹی میں خطاب کیا اورروسچین کا حواله دیتے پاکستان کولپیٹ میں لیا۔ امریکی صدرنے الزام عائد کیا کھ میراخیال ہے پاکستان ایٹمی پروگ…	6 The President of the United States addresses the Democratic Congress of Lakampie Nkamiti Did Orrus orchi refer to Pakistan in Nikolpet/file follo Yamgaida “Tad of Tud Washington: US President Joe Biden in his speech Referred to Pakistan. According to representative Jeonio Zack, the US president is a Democrat Oruschin spoke to the Congressional Campaign Committee Referring to Pakistan taken in C…	No_Hate
1567967963126579203	سابق وزیر خزانہ پنجاب مخدوم ہاشم جواں بخت اور سابق وزیر بیت المال پنجاب محمد اعجاز شفیع کا خان پور راجہ بازار میں شاندار استقبال -راجہ محمد سلیم ضلعی جنرل سیکرٹری پاکستان تحریک انصاف رحیم یارخان مختار احمد گجر نے ساتھیوں سمیت استقبال کیا https://t.co/dZFQUTZfmP	Ex-Finance Minister Punjab Makhdoom Hashim Jawan Bakht and Ex-Baitul-Mal Punjab Muhammad Ejaz Shafi received a grand welcome at Khanpur Raja Bazaar - Raja Muhammad Saleem District General Secretary Pakistan Tehreek-e-Insaf Rahim Yar Khan Mukhtar Ahmed Gujar welcomed along with his colleagues https://t .co/dZFQUTZfmP	NIL	NIL	No_Hate
1615497063969574913	آٹا بھی ملے گا لنگر خانے بھی کھلے گے کارخانے بھی چلیں گے معیشت بھی ابھرے گی امن امان بھی ہوگا خودمختاری بھی اور دنیا میں اِیَّاكَ نَعْبُدُ وَ اِیَّاكَ نَسْتَعِیْنُ کی گونج بھی👇 وہ شلوار قمیض والا واپس آرہا ہے انشاءاللہ #اکیلاکپتان_سب_پے_بھاری https://t.co/HIBIcpFOWR	Flour will also be found, anchorages will also open, factories will also run, the economy will also emerge, there will be peace and order, there will be independence, and in the world. Also the echo of Iyaak Naabood and Iyaak Nastaein. That shalwar kameez is coming back inshallah #AkilakCaptain_Sub_Pay_Bhari https://t.co/HIBIcpFOWR	ہے	is	No_Hate
1559905508651302914	اک تیرے نام "SHR" نے کم جلا رکھی ہے! جو "fortunre" نے بھی 🔥 لگا رکھی ہے own poetry 👉 @no_o_roo #RMMTLP #ImamKhadimHussainRizvi https://t.co/j2LtNeOLUR	One of your names "SHR" has been burned! Which "fortunre" has also put 🔥 own poetry 👉 @no_o_roo #RMMTLP #ImamKhadimHussainRizvi https://t.co/j2LtNeOLUR	NIL	NIL	No_Hate
1581283232649076737	پاکستان کی تاریخ میں یہ کبھی نہیں ہوا چن چن کر محب وطنوں کو ننگا کیا جا رہا تشدد کیا جا رہا ہے اور ملک لوٹنے اور سازشیں کرنے والے لندن سے بیٹھ کر ملک چلا رہے ہیں. پاکستان کی تاریخ میں کبھی اتنا بدترین زوال نہیں دیکھا جو اب ہو رہا ہے @TeamiPians #عوامی_لیڈر_عمران_خان https://t.co/WCVytqO9Xg	This has never happened in the history of Pakistan, the patriots are being exposed and tortured and those who are looting the country and making conspiracies are running the country from London. Pakistan's history has never seen such a worst decline as is happening now @TeamiPians #Awami_Leader_Imran_Khan https://t.co/WCVytqO9Xg	8607_77۸1 1 5 ٦ ‏ھ‎ 2:3	8607_7781 1 5 6 H 2:3	Hate
1563969759338795012	اس بندے کا نہیں قصور اس کے منہ کو بواسیر ہے جب تک یہ ایک دو چولیں نا مار لے اس کو سکون نہیں ملتا@fawadchaudhry https://t.co/21Dq2mTAZu	It's not this guy's fault, he has hemorrhoids in his mouth, he won't rest until he takes a couple of scalds @fawadchaudhry https://t.co/21Dq2mTAZu	NIL	NIL	Hate
1580473944054059008	اعظم سواتی قوم جان چکی ہے کہ تم صرف اپنے دونمبر کاروباروں کو بچانے کے لئے سیاست کرتے ہو، عوامی فلاح سے تمہارا کوئی لینا دینا نہیں۔ #شرم_کرو_اعظم_سواتی https://t.co/tgNZMbgbNL	Azam Swati nation has come to know that you only do politics to save your second business, you have nothing to do with public welfare. #Shame_On_Azam_Swati https://t.co/tgNZMbgbNL	چھ اعظم سواتی کیا تم نے مبھی اپ ذائی کادوباد میں بھی گواے کا سوداکیا؟ کبھی نہیں أ 22 اور تمہارے ٹر نے سرکاری خزانے کو مال مفت دل بے رت کی طر کیوں لوٹا؟ ےکا 8 ۲ 1 و 5 1 نر ہیں ۲ ۰ھ 7ھ ۱ ٭ سے ۳ ل 821	Six Azam Swati Did you do business with Goa in Abhi Upzai Kadubad too? never A 22 And your treasuries Why did you return the money free heart without blood? 8 2 1 of it And 5 1 are male 2 0h 7h 1 * 3 from L 821	Hate
1587746848793567232	اس ملک میں انصاف کا عالم دیکھیں یہ محترم @abtarar ثابت شدہ 1 کروڑ روپے کے فراڈ میں ملوث ہیں اور کے خلاف تھانہ ساجد شہید میں ایف آئی آر درج ہے اس کے علاوہ اشتہاری بھی اور مسلم لیگ ن کی حکومت میں ان کو اسسٹنٹ اٹارنی جنرل تعینات کا گیا ہے ۔ @TararAttaullah @AyazSadiq122 @CMShehbaz https://t.co/MOvgwtXyJ9	Look at the world of justice in this country. This honorable @abtarar is involved in fraud of 1 crore rupees and an FIR has been filed against him in Sajid Shaheed police station. Besides this, he has also been appointed Assistant Attorney General in the PML-N government. Has been posted. @TararAttaullah @AyazSadiq122 @CMShehbaz https://t.co/MOvgwtXyJ9	NIL	NIL	No_Hate
1578954598269976576	فرح گوگی اور پنکی پیرنی جہادین کی لیڈر اور شیریں آپا پانی پلانے کی لیڈر ہوگی۔۔۔۔🤣🤣 https://t.co/yImAyB8Otq	Farah Gogi and Pinky Pirni will be the leaders of Jihadin and Shireen Apa will be the leader of watering..🤣🤣 https://t.co/yImAyB8Otq	کی دقت گی مار کیل کال دے سلاہوںء جہا جج کر حصہ دنا ہگا: عحرائن خان	The difficulty of the call will kill the judge Should contribute: Ahrain Khan	Hate
1580909910564356098	بلوچستان عوامی پارٹی کے رہنما محمد یوسف بلوچ نے بلوچستان عوامی کے رہنما حیات بگٹی کے بھائی کی فوتگی پر انکے گھر جاکر لوحقین سے تعزیت کی اس موقع پر خان محمد رند ؤ غلام دین رونجھو بھی موجود تھے https://t.co/7G7lN8dh6y	Balochistan Awami Party leader Muhammad Yusuf Baloch visited Balochistan Awami leader Hayat Bugti's house and condoled with the relatives on the death of his brother.	NIL	NIL	No_Hate
1573614492013006851	اس تصویر نے عمران نیازی اور یوتھیوں کے پچھواڑے میں ایسی آگ لگائی ھوئی ھے کہ فائر بریگیڈ بھی ناکام ھو چکی ھے #WellDonePrimeMinister https://t.co/zLqfwmycCr	This picture has set such a fire in Imran Niazi's and Yuthi's backyard that even the fire brigade has failed. #WellDonePrimeMinister https://t.co/zLqfwmycCr	NIL	NIL	Hate
1577698301217996803	@MaryamNSharif دھونس دھمکی ججوں اورفوج کوگندی وڈیو کی بلیک میلنگ جیل میں نائنٹی میں سل فون پرانڈیالندن گیٹ نمبر4پر باتیں کرنا ننیب میں ترمیم سب کرکرا کرنہتی مجرمہ اشتہاری ابا کی طرح پاسپورٹ ٹرےکے بجاۓبوٹ پر رکھ کربھاگ گئی ہےمادر ذلت خان کے ڈر سے سب بھاگے نگے #فسادن_لندن_کو_چلی https://t.co/CbM3VU7xaK	@MaryamNSharif Bullying Threats Judges and Army Blackmailing Dirty Video Talking on cell phone in Nandi Gate No. 4 in Jail Edited in all crisply, the criminal has run away by putting her passport on the boot instead of the track like her father. #riot_in_london_to_chile https://t.co/CbM3VU7xaK	. 2 ٦٦ 2ٌ : ‏ا‎ ‎4	. 2 66 2 : A 4	Hate
1598615801220710402	@KeepsamM جہاں دلائیل کام نہ دیں وہاں دلے کام آتے ہیں #عمرانڈوووووزززز #چوتھیا #عمرانی_واشل⭕ پھوسی مار صحافی دگڑ دللا💯💯💯💯💯💯👇👇👇👇👇👇👇👇👇 چوئی 🐀 سنڈی 🐛 گنڈویا 🪱 چمونا 🦠 لولی 🥖 چمونا 🦠 چوئی 🐀 سنڈی 🐛 گنڈویا 🪱 چمونا 🦠 چوئی 🐀 سنڈی 🐛 گنڈویا 🪱 چمونا 🦠 لولی 🥖👇🥖🥖🐀 https://t.co/ZUL1N2JhS8	@KeepsamM Hearts work where you don't work hard #Umrandoooooooooooooooooooooooooooooooooooooooooooooooooooooooooooooooooooooooooooooooooooooooooooooooooooooooooood #Fourth #Umrani_Vashil⭕ Fusi Mar Journalist Dug Dalla Choi 🐀 Cindy 🐛 Gundoya 🪱 Chamona 🦠 Lovely 🥖 Chamona 🦠 Choi 🐀 Cindy 🐛 Gundoya 🪱 Chamona 🦠 Choi 🐀 Cindy 🐛 Gundoya 🪱 Chamona 🦠 Lovely 🥖👇🥖🥖🐀 https://t.co/ZUL1N2JhS8	NIL	NIL	Hate
1566673247567073280	جتنی پالش کل گجراتی باپ بیٹے نے، عمرانڈو کی، کی ھے مجھے تو یہ چوھدری نہیں مراثی لگتے ہیں #سلام_شہباز https://t.co/7uQhnSAWtk	As much polish as the Gujarati father and son, Imrandu, has done I don't think these Chaudhrys are Marathi #Salaam_Shahbaz https://t.co/7uQhnSAWtk	تن خبراز رز نے ساب مائرین کے لیے وز ۴7 رات دن ای کفکیا ہوا سے خود بللہ ایق یکیسن ٹکو بھی یلاب متاثڈی نی کی خدمت کے لیے مرک رکھا ہوا ے	Tan Khabaraz scored for Saab Marine Wiz 47 Night and day e kafkia air from self blala iq yakisan takko also Yalab is dedicated to serving customers	Hate
1594203561159794693	26 سال کی جدو جہد 26 تاریخ کو انشاءاللہ عمران احمد خان نیازی صاحب 75 سال تاریخ بدل جا رہے کپتان #پنڈی_کی_کال_عوام_تیار https://t.co/MHqis1avYW	26 Years of Struggle On 26th Inshallah Imran Ahmed Khan Niazi Sahib 75 Years History is Changing Captain #Pindi_Ki_Kal_Awam_Tayar https://t.co/MHqis1avYW	NIL	NIL	No_Hate
1614501385797791746	@FarooquiJameel خدا کے لیۓ بند کرو یہ ظلم لوگوں پر 🥲 https://t.co/Pr2HXtbhPK	@FarooquiJameel for God's sake stop this cruelty to people 🥲 https://t.co/Pr2HXtbhPK	NIL	NIL	Hate
1578062787280076802	یقین مانئے میں جب بھی #عمران_خان کو دیکھتی ہوں,تو حوصلہ بڑھ جاتا ہے کہ کوئی تو ہے جو #پاکستان کے عوام کا سوچ رہا ہے 🇧🇫 #عمران_خان_بچائےگا_پاکستان 🇧🇫❤️ #RetweeetPlease https://t.co/8MUVqiZpz2	Believe me whenever #Imran_Khan I see, so the courage increases that someone That's what the people of #Pakistan are thinking 🇧🇫 #Umran_Khan_will_save_Pakistan 🇧🇫❤️ #RetweetPlease https://t.co/8MUVqiZpz2	NIL	NIL	No_Hate
1596153918140063745	اقبال پارک راولپنڈی مری روڈ پر انتظامات مکمل ہر ضلعے کیلئے الگ کیمپ بنا ہے، کیمپ میں قالین بچائے گئے ہیں جبکہ سردی سے بچنے کیلئے انگھیٹی چولہے کا انتظام بھی موجود۔ اس بار انتظامات #ملتے_ہیں_پنڈی_میں #نکلو_پاکستان_کی_خاطر #الیکشن_کراؤ_ملک_بچاؤ https://t.co/Ko0wjksweA	Arrangements have been completed on Iqbal Park Rawalpindi Murree Road, a separate camp has been made for each district, carpets have been saved in the camp while there is also an arrangement of ring stove to avoid cold. Arrangements this time #meet_in_pindi #Get out of Pakistan for the sake of it #அலைக்கை_க்கு_க்கு_முல்_சுசை https://t.co/Ko0wjksweA	NIL	NIL	No_Hate
1565227179511877632	#اطہر_کا_دوہرا_انصاف @AzmaBokhariPMLN غنڈہ گردی اور پھر لالچ دینے والے ان کے مذموم عزائم کو پورا نہیں ہونے دیں گے، انشاء اللہ، معاشی بحالی میں خلل ڈالنے کے لیے غیر ملکی فنڈڈ انارکی کو شکست دی جائے گی۔ https://t.co/yjbZXFIJ3i	#Athar_Ka_Dohra_Insaf @AzmaBokhariPMLN The thugs and then the lurers will not allow their nefarious ambitions to materialize, God willing, the foreign funded anarchy to disrupt the economic recovery will be defeated. https://t.co/yjbZXFIJ3i	عمران خان نے ایک خاتؤون جو کون ےتابنش گیا ذیں 1ھ ہج ےسک سے مت ح بر یت> ح 7 ‎۱۰۱۸۱۷۸۸٢۲ ٢‏ 5 7 تج 8ك سر ٭ 1 کے 6ر کے ‎٦‏ ۳ سن 3 با الد اگک رن مم ور شحضبت کے غلاف ں ےکوی فصلہ 7 و وت	Imran Khan married a woman Who has been destroyed? 1H Hajj Esk Don't H Baryat> H 7 1018178822 2 5 7 TJ 8 K Sir * 1 of 6 6 3 years 3 years old Agik Ran Mamvar Shahzabat's covers are a crop 7	Hate
1617389478229999618	یہی ہے نیوٹرلز کی پلاننگ اور اس گندے کھیل کو ان لوگوں نے جمہوریت کا نام دیا ہوا ہے۔ #چوروں_کا_چور_CM_نامنظور https://t.co/kgBjoTe59A	This is the planning of neutrals and this dirty game is called democracy by these people. #Thieves_Ka_Chur_CM_Disapproved https://t.co/kgBjoTe59A	7 تار کاپادل 7 بین مار کیٹ یں 1ل ) 7 رو ‎٠‏ کا ہو لی	7 wire ropes 7 intermarkets 1l ) 7 became 0	Hate
1563985662503682050	جب اللہ کا عذاب آتا ہے تو لوگ استغفار کا ورد کرتے ہیں مگر بد قسمتی سے ہمارے ملک میں ایک ایسا فتنہ مسلط ہوا ہے جو عذاب سیلاب کے ہوتے ہوئے بھی مجرا ڈانس میں مست قلندر رہتے ہیں۔۔۔ https://t.co/I8yLGCKFW0	When Allah's punishment comes, people recite Istighfar, but unfortunately, such a fitna has been imposed in our country that despite the punishment of floods, they remain intoxicated in the Majra dance. https://t.co/I8yLGCKFW0	NIL	NIL	Hate
1568666901680627716	مرشد نے آج حمزہ ککڑی مریم بھگوڑی بلو رانی ڈیزل کی اولاد کو #پھٹے_ہوۓ_بچے کہ دیا https://t.co/1UWl9fuGGE	Murshid today called Hamza Kakadi Maryam Bhaguri Balu Rani Diesel's children #फट्य_होज_बचे https://t.co/1UWl9fuGGE	NIL	NIL	Hate
1563793073037099012	وقار ستّی کے خلاف درج ہونے والے مقدمے کی مذمت کرتے ہیں اس کیس کو فوری خارج کیا جائے https://t.co/RGGuRte09U https://t.co/BSdbcE0gaG	We condemn the case filed against Waqar Satti, the case should be dismissed immediately https://t.co/RGGuRte09U https://t.co/BSdbcE0gaG	NIL	NIL	No_Hate
1593846743518838784	پاکستانی پنجابی سٹیج ڈرامے کے اداکار طارق ٹیڈی وفات پا گئے ہیں اِنّا لِلّٰهِ وَاِنّا اِلَيْهِ رَاجِعُوْن https://t.co/80IJccerZH	Pakistani Punjabi stage drama actor Tariq Teddy has passed away Inna Lillah and I will return to Him https://t.co/80IJccerZH	NIL	NIL	No_Hate
1592552766672883714	#سعودی ولی عہد محمد بن سلمان کے عمران خان کو دیئے گئے تحائف کا خریدار بھی منظر عام پر آگیا شہزاد اکبر نے بروکر کا کردار ادا کیا #گھڑی_چور_پکڑا_گیا https://t.co/xja8F2Qvy1	The buyer of the gifts given by #Saudi Crown Prince Muhammad bin Salman to Imran Khan also came to light. Shehzad Akbar played the role of a broker. #Watch_Thief_Caught https://t.co/xja8F2Qvy1	NIL	NIL	Hate
1563780834909470721	جئے الطاف جئے مہاجر @AltafHussain_90 https://t.co/tOXi72urlD	Jai Altaf Jai Mahajir @AltafHussain_90 https://t.co/tOXi72urlD	NIL	NIL	No_Hate
1560848884276121602	@MemonaMushtaq یہ چوپا ماسٹر ہے https://t.co/Vsu2NQwKqT	@MemonaMushtaq This is Choppa Master https://t.co/Vsu2NQwKqT	NIL	NIL	Hate
1564868494503645185	آج خاص کر پی ڈی ایم والوں مخاطب ہوں وہ کیڑا ختم ہوا کے نہیں ابھی 🤣🤣 https://t.co/awY8W2PJDY	Today I am addressing PDM people especially, that worm is not gone yet 🤣🤣 https://t.co/awY8W2PJDY	یہ وہ چیز ہے جسے صرف کاٹتے وقت آنکھوں سے آنسو آتے تھے اب خریدنے جائیں تو نکل آتے ہیں (ي) ا	This is something that only when cutting Tears were coming from the eyes to buy now If they go, they come out (y) a	Hate
1596814898238873600	کبھی غم کی آگ میں جل اٹھے کبھی داغ دل نے جلا دیا اے جنون عشق بتا ذرا مجھے کیوں تماشا بنا دیا غم عشق کتنا عجیب ہے یہ جنون سے کتنا قریب ہے کبھی اشک پلکوں پہ رک گئے کبھی پورا دریا بہا دیا جو رکے تو کوہ گراں تھے ہم جوچلے تو جاں سے گزر گئے رہ یار ہم نےقدم قدم تجھے یادگار بنا دیا https://t.co/LxOKcdJlKL	Sometimes burn in the fire of grief Sometimes the scarred heart burned Please tell me, O love, love Why did you make me a joke? How strange is grief and love? That's how close it is to madness Sometimes the tears stopped on the eyelids Sometimes the whole river overflowed If we stopped, we were down Jochle passed away Dear friend, we have taken step by step Made you memorable https://t.co/LxOKcdJ…	NIL	NIL	No_Hate
1580123240504385536	زمانہ آيا ہے بے حجابي کا ، عام ديدار يار ہو گا سکوت تھا پردہ دار جس کا ، وہ راز اب آشکار ہوگا گزر گيا اب وہ دور ساقي کہ چھپ کے پيتے تھے پينے والے بنے گا سارا جہان مے خانہ ، ہر کوئي بادہ خوار ہو گا !! #قومی_زبان https://t.co/0M2xaoTGCl	The era of hijabi has come, common sight will help There was a veil of silence, the secret of which will now be revealed Gone are the days when drinkers used to drink in secret The whole world will become a pub, everyone will be hungry!! #National_Language https://t.co/0M2xaoTGCl	NIL	NIL	No_Hate
1617835350218661891	ملک شہاب علی کھوکھر نائب کپتان عمران ٹائیگرز (شمالی پنجاب) مقرر اللہ پاک آپکو اسلام و پاکستان کی سربلندی کیلئے عمران خان کا پیغام عام کرنے، اس عہدے کا حق ادا کرنے اورحقیقی آزادی کی جنگ میں غازی ملت عمران احمدخان نیازی کے ساتھ کئے اپنے عہد کی پاسداری کرنے کی توفیق نصیب فرمائے آمین https://t.co/RloSBCjPQR	Malik Shahab Ali Khokhar appointed vice-captain Imran Tigers (North Punjab). May Allah bless you to spread Imran Khan's message for the upliftment of Islam and Pakistan, to fulfill the right of this position and to keep your pledge with Ghazi Millat Imran Ahmad Khan Niazi in the real freedom struggle, Amen https://t .co/RloSBCjPQR	۷۷۷۱۷۰۰۱۲۱۲١۵۰۱ ٥٢۰۰٥٠٠٢ -> ۷۳	777170012121501 52005002 -> 73	No_Hate
1598607435907977219	@HamidMirPAK @HamidMirPAK قیامت کے دن تیرا گریبان ہوگا عوام کا ہاتھ کیڑے پڑیں گے تمہیں انشاء اللہ https://t.co/utwuC6azuA	@HamidMirPAK @HamidMirPAK On the Day of Resurrection, your neck will be on your neck, people will get worms in the hands of you, God willing https://t.co/utwuC6azuA	"بندوق" کی"غداری" زیادہ سے زیادہ چند لوگوں کی جان لے سکتی ہے۔۔۔ مگر "قلم" کی ''خیانت" پوری قوم کو تباہ کے مکوے ‏ دے	The "treason" of the "gun" is a few at most It can kill people. But the "betrayal" of the "pen" destroyed the entire nation Give me a hug	Hate
1564257492758138881	@PTIofficial اس نےغیرت اور تخم خنزیر زرداری کی بھی سن لو کہ #صحت اجازت دیتی تو 🤣🤣🤣 https://t.co/xooNXQx7h7	@PTIofficial also listen to his pride and scumbag Zardari that #health would allow 🤣🤣🤣 https://t.co/xooNXQx7h7	٦صحت‏ اجازت دیی تو سیلاب متاثرین کے پاس ہوتا/“	6 If health permits The flood would have been with the victims.	Hate
1614269433803071490	@rehamkhan ریحام خان نے اپنے نئے خاوند کے ساتھ نازیبا تصویر وائرل کر دی https://t.co/KgkeMiqyZ9	@rehamkhan Reham Khan went viral with her new hubby https://t.co/KgkeMiqyZ9	NIL	NIL	Hate
1591498480476119040	@NawabSwati88 @M_Shuja_ul_Mulk امیر جمعیت علماء اسلام بلوچستان وفاقی وزیر ھاوسنگ اینڈ ورکس حضرت مولانا عبدالواسع صاحب جمعیت علمائے اسلام ضلع پشین کے امیر مولوی عزیز اللہ حنفی صاحب جمعیت علمائے اسلام کے رہنما ملک حاجی نصرالا کاکڑ ضلع پشین کے زیر اہتمام تربیتی کنونشن کے اسٹیج پر جلوہ افروز ہے https://t.co/0xa5n9DYas	@NawabSwati88 @M_Shuja_ul_Mulk Ameer Jamiat Ulema Islam Balochistan Federal Minister Housing and Works Hazrat Maulana Abdul Wasi Sahib Amir Maulvi Azizullah Hanafi Sahib of Jamiat Ulema-e-Islam district of Pashin Leader of Jamiat Ulema-e-Islam Malik Haji Nasrala is appearing on the stage of the training convention organized by Kakar District Pashin https://t.co/0xa5n9DYas	NIL	NIL	No_Hate
1593161537438769154	@HamidMirPAK پہلی بار نیازی کو ٹکر کے لوگ ملے ہیں۔ ن لیگ کھسی پی پی کھسی جے یو ائی جماعت اسلامی کھسی لبیک والے کھسی۔۔ لیکن پہلی بار ایک مرد سے پنگا پڑھ گیا جس نے بلٹ پروف شیشوں سے اندر گھس کر بینڈ بجا دی۔۔ https://t.co/Undp9gUJMC	@HamidMirPAK For the first time Niazi has met the people of Tucker. PML-N Khasi PP Khasi JUI Jamaat-e-Islami Khasi Labik Wale Khasi. But for the first time, it was read by a man who sneaked in through bulletproof glasses and played the band. https://t.co/Undp9gUJMC	NIL	NIL	Hate
1578383005407535107	عمران خان 2 نمبر آدمی ہے. مریم نواز اگر عمران خان نے کہہ دیا کہ مریم نواز 2 نمبر عورت ہے تو اس میڈیا نے چیخ چیخ کر اپنے کپڑے پھاڑ لینے ہیں https://t.co/Ic5ZVbUMSw	Imran Khan is number 2 man. Maryam Nawaz If Imran Khan said that Maryam Nawaz is number 2 woman, then this media should scream and tear their clothes https://t.co/Ic5ZVbUMSw	NIL	NIL	Hate
1618183982818160641	سردی میں برف انجوائے کرنے کا شوق ہو تو بلوچستان آئیے گا، یہاں آپ بولان کے پہاڑ بھی اور میدان بھی اور سر سبز کھیت اور چمن بارڈر ایک ساتھ دیکھیں۔ یہاں آکر خرچہ پانی ختم ہو گیا تو بھی کوئی پریشانی نہیں یہاں کے لوگ بہت پیارے اور خوبصورت دل والے ہیں 4 https://t.co/R66jA81Wor	If you like to enjoy the snow in winter, come to Balochistan, here you can see Bolan mountains and plains, Sar Sabz Khet and Chaman border together. Even if you run out of water after coming here, there is no problem. The people here are very sweet and have beautiful hearts. 4 https://t.co/R66jA81Wor	NIL	NIL	No_Hate
1581269027065765888	@rdkestate @TahirMughalPml2 سچی یاد آیا ، وہ بھگوڑی بھی بھاگ گئی آپ اب آوارہ پھرو سرے۔ تے نئی کُنڈہ ہاتھی پھرے لُنڈا https://t.co/F6lMMABobB	@rdkestate @TahirMughalPml2 Missed the truth, she ran away too You wander now Surrey And Nai Kunda Hathi Phare Lunda https://t.co/F6lMMABobB	یو می ھک نس ردار اگ رکسی ور سے ٹھنڈ پچھوڑکر مج اگ بات تو بات مو ںکواکسض ر سج نہیں اگ احتاے [ 9م	You can use the radar Back off the ice from the ice cream Maj ag baat to baat I am not excited Ag ahaha [ 9m	Hate
1568964255407284230	#دھرتی_پر_اوَتار ہنگری کی خاتون نجومی "بوریسکا" کے مطابق، سن 2000ع سے پہلے پہلے اُگر حالات، قتل و لوٹ مار کے بیچ انسانی خوبیوں کا وکاس، ایک فرشتے کے دوارا بھوتِکواد(Materialism) سے کامیاب جدوجہد کا نتیجہ ہوگا، https://t.co/2T8wN41bFG https://t.co/cf9dC9LiEp	#Incarnate_on_Earth According to the Hungarian female astrologer "Boriska", before the year 2000, the first Ugar conditions, the development of human qualities in the midst of killing and looting, will be the result of a successful struggle against materialism by an angel, https://t. co/2T8wN41bFG https://t.co/cf9dC9LiEp	پا پبلا 1 - 907+00 ہہ ہہ" بس صرسفت سے دوارا بوگواد( 110 ‎0/8۸٥‏ ے ااضاب_ے جرھہے کا نجس ہوگاہ سس آوصب اتک ضصضرستحت کے بڑی تحص راو میں تچھونے تھے .- سی پےرو۴ار یکر بھوگوا وکو م7 ہیں ہل رگت۔ 6 بن موا 2( 131ء۱۶ 1ز ماج۴ ج52 دہ اد5 زطا ‎٥۲۹۷۴۷۵‏ و-- انا ۴	Pa Pabla 1 - 907+00 hahaha" 110 (0/885) of Bogwad by Bus Sarasfat Najis Hogah Sis Ausab Atik had to be touched in large areas of the surface .- Si Payro4ar Yekar Bhogwa Vaku M7 Hain Hill Ragat. 6 Bin Muwa 2 (131 16 1 Z Maj 4 J 52 Dah Ad 5 Zata 5297475 and-- Anna 4	No_Hate
1564926002454831104	گنتی کے چند منٹوں میں پوری قادیانی لابی کو شکست فاش دینے والا مرد مجاھد ۔۔۔ چند الفاظ ہمارے شیر کے لیے ۔۔ https://t.co/Z7woGDimQf	The man who defeated the entire Qadiani lobby in a few minutes of counting. A few words for our lion. https://t.co/Z7woGDimQf	NIL	NIL	No_Hate
1587457966508314624	@Bashirchaudhry پہلے مجھے لگا کہ تجھ کارٹون کی صرف شکل چوتیوں والی ہے https://t.co/FZoSZrCeXA	@Bashirchaudhry At first I thought your cartoon only looked like boobs https://t.co/FZoSZrCeXA	NIL	NIL	Hate
1587590913932595202	*ہمیشہ اس انسان کی بہت* *عزت کرو جو تمہیں ناپسند ہو* *کیونکہ ہو سکتا ہے کہ تمہاری* *عزت کرنے سے اس کا کردار بدل جائے* محمد بلال 💞 https://t.co/0eMn82BFru	*Always this man's lot* *Respect what you dislike* *because maybe your* *Respect will change his character* Muhammad Bilal 💞 https://t.co/0eMn82BFru	NIL	NIL	No_Hate
1614980805972877314	مجھے یقین ہے کہ مارچ اپریل میں الیکشن ہو جائیں گے، عمران خان @IK @elections عمران خان کا کہنا تھا کہ ہم شہباز شریف کی نیندیں حرام کرنے والے ہیں، نگران سیٹ اپ کے لیے قومی اسمبلی میں واپس جاسکتے ہیں۔ Read more https://t.co/dCAKbG1mSv @imrankhan @elections @april @march @Believe https://t.co/HKyqsdsHHk	I am sure that elections will be held in March and April, Imran Khan @IK @elections Imran Khan said that we are going to disturb Shahbaz Sharif's sleep, he can go back to the National Assembly for the caretaker setup. Read more https://t.co/dCAKbG1mSv @imrankhan @elections @april @march @Believe https://t.co/HKyqsdsHHk	NIL	NIL	No_Hate
1579826230828105730	جماعت احمدیہ مسلمہ پر پاکستان میں ظلم و ستم کرنے والے شریرو دیکھو کہ خدا تعالیٰ کی تقدیر ہمیں ایک کے بعد ایک اور نئی اور خوبصورت مسجد بنانے کی توفیق عطا کر رہا ہے اور تم نے کفار مکہ کی طرح مساجد و معابد گرانےکا مکروہ کام اپنے ذمہ لگا لیا ہے احمدیت یعنی حقیقی اسلام زندہ باد https://t.co/C2bynd9JHN	The perpetrators of persecution of Ahmadiyya Muslimah in Pakistan See that God's destiny is giving us the opportunity to build another new and beautiful mosque one after another And like the infidels of Makkah, you have taken upon yourself the abominable task of demolishing mosques and temples Long live Ahmadiyya means true Islam https://t.co/C2bynd9JHN	NIL	NIL	Hate
1565701331532357639	نورے پٹواری اور طیفے کو 27 ستمبر کو UN کی جنرل اسمبلی میں خطاب کی دعوت - بیغیرتی کے عالمی ایوارڈ کے لیے جاتی مجرہ کے لوہاروں کیلئے پُرزور حمایت کا اعلان کرینگے😂🤣😅 https://t.co/zwUomnNxGo	Invitation to Nore Patwari and Tefe to address the UN General Assembly on September 27 - Will announce strong support for blacksmiths of Jati Mujra for World Award of Honor 😂🤣😅 https://t.co/zwUomnNxGo	اس ان تی و جنپوں نے بین مین یکر دی بک یٹ"	This int Jinpa gave Ben Man Yakar "book"	Hate
1578804103609987074	#امن پاک افغان سرحدی دیہات سالارزئی برسدین میں امن کرکٹ ٹورنامنٹ کے فائنل میچ ۔۔ جس طرح وزیر ستان سے باجوڑ تک امن مارچ ہورہےہیں نوجوان نے مختلف گیمز اور ٹورنامنٹ کو بھی امن کے نام سے منسوب کررہے ہیں ۔۔ قبائلی نوجوان اور بچے بھی جنگ سے تنگ آگئے ہیں۔۔۔ https://t.co/JRFMLfXAPH	# Peace Final matches of peace cricket tournament in Pak-Afghan border villages of Salarzai Barashteen. Just as peace marches are taking place from Waziristan to Bajaur, the youth are naming various games and tournaments in the name of peace. Tribal youth and children are also tired of war. https://t.co/JRFMLfXAPH	NIL	NIL	No_Hate
1593562043268964352	اللہ تعالی ان لوگوں کا ساتھ دینا اور ان کو تباہ و برباد کرے شریف خاندان اور نون لیگ کا ساتھ دینا اور کو بھی تباہ و برباد کرے اللہ تعالی گن نسلوں میں ایسی بیماری لائن پوری دنیا میں علاج نہ ہو https://t.co/YMHI8r2m3M https://t.co/BYvEGWlCGX	May Allah support these people and destroy and destroy them. May Allah support and destroy the Sharif family and the Non-League. /YMHI8r2m3M https://t.co/BYvEGWlCGX	شاہ زیب خانزادہ اور جیو سمیت تمام ‎۷۸۷۲۹٢۲۵۴‏ صحافی مشعل اوبامہ سے 2015 میں مریم نواز کو پاکستان میں غریب اور نادار بچیوں کی تعلیم کے لئے 70 ملین ڈالرز دئے گئے اس پر کب پروگرام کر رہے ہیں۔ وہ کیسے مریم نواز کھا گئی اس پر کوئی پروگرام؟	All including Shahzeb Khanzada and Geo 787292254 from journalist Michelle Obama, 2015 I Maryam Nawaz poor and needy in Pakistan 70 million dollars were given for the education of girls When are you programming on it? Any program on how she ate Maryam Nawaz?	Hate
1615349460019695617	پہنچی وہیں پہ خاک جہاں کا خمیر تھا۔ دو نمبر عورتیں اور ان کا بروکر۔ @MaryamNSharif @GulBukhari @Marriyum_A @NawazSharifMNS @pmln_org https://t.co/F7if9aTJ8O	Arrived at the place where the dust was. Two number women and their broker. @MaryamNSharif @GulBukhari @Marriyum_A @NawazSharifMNS @pmln_org https://t.co/F7if9aTJ8O	NIL	NIL	Hate
1581542657557680128	کچھ مہینے پہلے تک یہ جماعت ایک دوسرے کو عوام اور ملک دشمن قرار دیتی تھی آج ایک خان کے خلاف اکٹھی ہوکر الیکشن لڑ رہی ہیں صرف اپنے ذاتی مفاد کے لیے اگر آج بھی عوام کو ان کی منافقت اور دوغلہ پن نظر نہیں آتا تو آنے والے وقت میں بھی 75 سالوں والےحالات ہوں گے. #بلے_پہ_ٹھپہ https://t.co/Yoqh3KZAfz	Until a few months ago, this party used to call each other as enemies of the people and the country. Today, they are fighting elections by coming together against one Khan only for their personal interest. 75 years in time too There will be situations. #बले_पहा_थपै https://t.co/Yoqh3KZAfz	اہپےہەہ صرقت _ تا - :- . ًُ۲ ۶ تج انت ۲11 انان تر لک الصاف ہے حر من ران ضان کا ‎٦‏ اق ل۶م ے ام پقام 15۸۴.۴	Theft to - :-. ُ2 6 Taj Anat 211 Anan Tar Lak Al-Saf Hai Har Man Ran Zaan Ka 6 Aq Lam 6 Ma Um Paqam 1584.4	Hate
1608591746296086528	گلشن اقبال میں ڈکیتی کی واردات کرنے والے ملزمان کے واضح چہرے ڈاکووں کو باآسانی پہچانا جا سکتا ہے #KarachiPolice https://t.co/DZWFQzd0cS	The clear faces of the accused who committed the robbery in Gulshan Iqbal, the robbers can be easily identified. #KarachiPolice https://t.co/DZWFQzd0cS	NIL	NIL	No_Hate
1579509933770670081	مبشر لقمان آوارہ کتوں کی طرح بھونک رہا اس کتے کو اسکی اوقات میں رکھنے کے لئے ذیادہ سے ذیادہ ریٹویٹس کریں #کتی_نسل_کا_مبشر_کتا #بھونک_مبشر_کتے_بھونک https://t.co/yTH0F0s7Gr	Mubashir Luqman barking like a stray dog ​​Retweet as much as possible to keep this dog in its time #Kati_nasal_ka_evangelist_dog #भोनक_मुबश्र_कते_भोनक https://t.co/yTH0F0s7Gr	NIL	NIL	Hate
1562869527473721348	جس کھیت سے دہقاں کو میسرّ نہیں روزی اُس کھیت کے ہر خوشۂ گندم کو جلا دو ♥️✨ #سعدرضوی_سیلاب_زدگان_کےساتھ https://t.co/YDpF52PNJP	The field from which the farmer is not able to make a living Burn every grain of wheat in that field #SaadRizvi_Selab_Zadagan_with_https://t.co/YDpF52PNJP	NIL	NIL	No_Hate
1592576688915111937	اب تک کا بڑا اور انتہائی گھٹیا ڈاکا! #گھڑی_چور_پکڑا_گیا #گھڑی_چور_پکڑا_گیا #گھڑی_چور_پکڑا_گیا #گھڑی_چور_پکڑا_گیا #گھڑی_چور_پکڑا_گیا #گھڑی_چور_پکڑا_گیا #گھڑی_چور_پکڑا_گیا #گھڑی_چور_پکڑا_گیا #گھڑی_چور_پکڑا_گیا #گھڑی_چور_پکڑا_گیا #گھڑی_چور_پکڑا_گیا #گھڑی_چور_پکڑا_گیا https://t.co/BanWooLvMc	The Biggest and Most Badass Robber Ever! #Watch_thief_caught #watch_thief_caught #watch_thief_caught #watch_thief_caught #watch_thief_caught #watch_thief_caught #watch_thief_caught #watch_thief_caught The thief was caught https://t.co/BanWooLvMc	NIL	NIL	Hate
1573255032446898176	⭕ڈاکٹر شرین مزاری یہ حرام خور نہ عورت نہ مرد نہ خسرا ہے ایسی جانور صفت مخلوق سور کی پیوند کاری سے پیدا ہوتی ہیں مطلب شیعہ رافضی کافر ٹرانسجنڈر ایریا اسلام آباد میں افتتاح کرتے ہوئے یکم دسمبر 2018 ٹرانس جینڈر بل کی حمایت میں یہی عورت سب سے زیادہ کھل کر حمایت کر رہی ہے 👇📸 https://t.co/6Vr5deuHGO	⭕ Dr. Shareen Mazari This haram-eater is neither a woman nor a man nor a measles, such animals are born from the grafting of a pig, meaning Shia Rafizi is an infidel. Inaugurating the Transgender Area in Islamabad December 1, 2018 She is the most outspoken woman in support of the transgender bill 👇📸 https://t.co/6Vr5deuHGO	٣۰ ۲۲۱۷۵۱٣ ۱۷۵:۰ ۴ 1315987067 [605 ‏3م‎	30 2217513 175:0 4 1315987067 [605 3m	Hate
1580895134534627328	جو شخص اتنے بڑے بڑے ڈاکوؤں کو کلین چٹ دلوا رہا ہے سوچو وہ خود کتنا بڑا ڈاکو ھو گا🖐 https://t.co/GYHJtDKa8i	The person who is giving a clean chit to such big robbers, think how big a robber he himself will be 🖐 https://t.co/GYHJtDKa8i	NIL	NIL	Hate
1564055445328871426	غاسب اور درندہ صفت حکمرانوں کے ٹلتے ہی سارے عذاب ٹل جائیں گے https://t.co/8QfPrdDKPP	As soon as the usurper and beastly rulers are removed, all punishments will be removed https://t.co/8QfPrdDKPP	(۵ 1 ٰ 27 : 5 ہاو کے کب ض	(5 1 27 : 5 Haw K When	Hate
1559891979764383745	@CSMR786 او ہلو بھائی جی یہاں ہم کو آپ سے اختلاف ہے ان #لوطیوں کے پاس #دماغ نام کی چیز سرے سے ہی نہی ہوتی ہے ان کے اگر #دماغ ہوتے بھی ہیں تو #پچھواڑے کی طرف سے ھو گا https://t.co/id2vHrH6Pt	@CSMR786 Oh hello Brother, we disagree with you here These #Lots do not have the thing called #mind at all If they have #brains, it will be from the #back https://t.co/id2vHrH6Pt	NIL	NIL	Hate
1561272582980214784	اسلام آباد: افغان سفارت خانے میں 103ویں یوم آزادی کی تقریب۔ اعلی سطحی پاکستانی حکام، علماء، پروفیسرز، سیاستد دانوں اور دیگر کی شرکت۔ https://t.co/7OgejumvDv	Islamabad: 103rd Independence Day Celebration at Afghan Embassy Participation of high level Pakistani officials, scholars, professors, politicians and others. https://t.co/7OgejumvDv	NIL	NIL	No_Hate
1558469733367816195	یہ آگ لگتا ہے اِک دن مُجھے جلا دے گی....!! اور اِس کا ساتھ مِرے شہر کی ہوا دے گی....!!!! https://t.co/zrNklWGEAF	This fire seems to burn me one day...!! And with him the air of my city will give...!!!! https://t.co/zrNklWGEAF	NIL	NIL	No_Hate
1580167158876995584	آسٹریلیا کو 8 کاکڑا پڑگیا،پھر شکست،انگلینڈ سیریز جیت گیا #AUSvsENG #cricagain https://t.co/UuQt1XwdXh	Australia lost by 8 wickets, then lost, England won the series #AUSvsENG #cricagain https://t.co/UuQt1XwdXh	NIL	NIL	No_Hate
1577878227246141440	@hamzakasur بات کیا سمجھے ڈاکٹر صاحب ۔ یہ شوق بھی خود کرنا پڑتا ۔ لکڑی سے آگ جلانا پھر دھواں دھواں ، پھر شام دھواں دھواں ۔ سب کچھ اپنے ہاتھوں سے کرتے ہیں ۔ خود سے اپناٸت و خلوص محبت کہاں سے ڈالیں ۔ لیکن پکتا مزۓ کا ہے https://t.co/aEqGU2IoV3	@hamzakasur what do you think doctor sir. This hobby also had to be done by oneself. Light a fire with wood, then smoke smoke, then smoke smoke in the evening. They do everything with their own hands. Where do you get self-acceptance and sincere love? But cooking is fun https://t.co/aEqGU2IoV3	NIL	NIL	No_Hate
1566079194177699841	کیسی عجیب بات ہیں آج جن کو دہشتگرد کہتے ہیں وہ عوام کی خدمت کرتے ہوٸیں نظر آرہے ہیں اور سب شریف لوگ اخلاق والے اپنے اپنے گھروں میں بیٹھے ہیں #سعدساڈا_شیراے #سعدرضوی_سیلاب_زدگان_کےساتھ https://t.co/2pjTAdyGYq	What a strange thing today, those who are called terrorists are seen serving the public and all decent people are sitting in their homes with morals. #Saadsada_Shiraya #SaadRizvi_Selab_Zadagan_with_https://t.co/2pjTAdyGYq	NIL	NIL	No_Hate
1560625834989424641	اسی فتنہ کی وجہ سے ہزاروں یوتھیوں کی بہنے آج عزت سے بےعزت ہو گئے #گستاخوں_کایارعمران_خان https://t.co/NNFHVN9BzQ	Due to this temptation, the daughters of thousands of youths have become dishonorable today #Gastakhun_KayarUmran_Khan https://t.co/NNFHVN9BzQ	نراروں تحریکوں می بنوں نے اپنے بای قربان کے گر تححریک انصاف وہ داعد تح ریک سے جس بس بھائیوں نے اتی بن ں کی عزقیں قربا نگی۔	I have sacrificed my life in various movements If Tehreek Insaf is the one from Daad Tehreek But the brothers did not sacrifice the honor of these sons.	Hate
1587398544930971648	کور کمانڈر بلوچستان لیفٹیننٹ جنرل آصف غفور کی خصوصی ہدایت پر بلوچستان کی ہزارہ برادری کے دیرینہ مطالبے کی تکمیل ہزارہ ٹاؤن میں پولیس سٹیشن قائم کردیا گیا پولیس سٹیشن میں انسپکٹر سمیت 11 پولیس اہلکاروں کی تعیناتی بھی کر دی گئی ہے @peaceforchange https://t.co/267dfdbP12	On the special instructions of Corps Commander Balochistan Lt. Gen. Asif Ghafoor, fulfilling the long-standing demand of the Hazara community of Balochistan, a police station has been established in Hazara town. @peaceforchange https://t.co/267dfdbP12	NIL	NIL	No_Hate
1593633641862766596	پاکستان تحریک انصاف (پی ٹی آئی) کے چیئرمین عمران خان کا کہنا ہے کہ نواز شریف تو چاہتا ہے کہ کسی طرح عمران خان کو فارغ کرو #کہاتھا_بھاگنےنہیں_دینگے https://t.co/OUf1gVA8QW	Pakistan Tehreek-e-Insaf (PTI) Chairman Imran Khan says that Nawaz Sharif wants to relieve Imran Khan somehow. #Kahatha_Bhaganehneh_Denge https://t.co/OUf1gVA8QW	''نواز شرف لو چاہتاے عحران خا نکو سی ظ رح فا ررغحکر و'' اور ‎"٥‏	Nawaz Sharaf wants to take it Ahran khanku si za rah fa rraghakar wa'' And "5	No_Hate
1564943386473381889	اقوام عالم سے اپیل ہے کہ بلوچستان سیلاب زدگان کی مدد کریں مگر اپنے فنڈز اور امداد کو خود اپنے اداروں کے ذریعے تقسیم کریں پاکستان اور اسکی اداروں پہ انحصار نہ کریں وہ کرپشن سے پہلے ہی مشکوک ہیں وہ انھی امداد کو بلوچ نسل کشی اور زاتی مفادات میں استعمال کرتے ہیں https://t.co/TRSMhuqaYY	The United Nations is requested to help the flood victims of Balochistan but distribute their funds and aid through their own institutions. Do not depend on Pakistan and its institutions. They are already suspicious of corruption. I use https://t.co/TRSMhuqaYY	NIL	NIL	Hate
1568527648460050434	مراسیوں والی باتیں ۔ خون ہی مراسیوں کا ہے ۔ یا پھر بیچارہ کسی تاریک رات میں کسی سازش کا شکار ہوا ہے ۔ اور اب بلیک میل ہو رھا ہے ۔ چلو جی سانوں کی ۔ ہمت ہے تو اپنی غلطی خود عوام کے سامنے پیش کرے نہیں تو ساری زندگی بلیک میل ہی ہو گا ۔ لوگ تو کہیں گے ۔ مراسی سردار دوست مداری ۔ https://t.co/LI1Q6DVPh2 https://t.co/yLkPZ59KXW	Bad things. Blood is the disease. Or the poor man has become a victim of some conspiracy in some dark night. And now blackmail is happening. Let's say yes. If you have the courage, you should present your mistake to the public, otherwise it will be blackmail for the rest of your life. People will say. Marasi Sardar Dost Madari. https://t.co/LI1Q6DVPh2 https://t.co/yLkPZ59KXW	NIL	NIL	Hate
1574394887461810177	ان نفرت بھرے فرقوں سے مجھے منسوب نہ کرنا میں مسلک عشق سے ہوں، انسانیت ہے فرقہ میرا https://t.co/h56lg6XRgo	Do not associate me with these hateful sects I am from the religion of love, humanity is my sect https://t.co/h56lg6XRgo	NIL	NIL	No_Hate
1593165329534181376	سب نے مانا مرنے والا دہشت گرد اور قاتل تھا ماں نے پھر بھی قبر پہ اس کی راج دلارا لکھا تھا #قومی_زبان https://t.co/wqsnHJVA6K	Everyone believed that the deceased was a terrorist and a murderer The mother had still written on the grave her Raj Dalara #National_Language https://t.co/wqsnHJVA6K	NIL	NIL	No_Hate
1606613892884578306	ان9مہینوں میں پاکستان ڈاکو مومنٹ نے ایک شخص کو گرانے کیلئے ہر غلیظ پروپیگنڈے کا سہارا لیا۔ انکے ساتھیوں کو پکڑ کر ننگا کردیا گیا، ان کا موقف بیان کرنے والے صحافیوں کو چینلز سے نکال دیا، گولیاں چلائ گئ لیکن وہ پہلے سے کئ زیادہ مضبوط بن کر ابھرا، کیونکہ انہوں نے حق کا راستہ چنا ہے۔ https://t.co/r1UKZYxWNq	In these 9 months, Pakistan Bandit Moment resorted to every dirty propaganda to bring down a person. His accomplices were caught and exposed, journalists who expressed his position were expelled from the channels, shots were fired, but he emerged stronger than before, because he chose the right path. https://t.co/r1UKZYxWNq	NIL	NIL	Hate
1593200089522372608	حقیقی آزادی مارچ : ادینزائی تحصیل لوئر دیر نے کپتان کے حق میں فیصلہ سنادیا ۔ وزیراعلیٰ محمود خان بڑے عوامی اجتماع سے خطاب اور بہت سے ترقیاتی منصوبوں کا افتتاح بھی کیا گیا۔ @IMMahmoodKhan #CMKP_IN_MALAKAND https://t.co/x2iNcPiXfb	True Freedom March: Adenzai Tehsil Lower Dir gave a decision in favor of the captain. Chief Minister Mehmood Khan addressing a large public gathering And many development projects were also inaugurated. @IMMahmoodKhan #CMKP_IN_MALAKAND https://t.co/x2iNcPiXfb	NIL	NIL	No_Hate
1614962452592197637	پاکستان کے پاس طاقتور ترین فوجی قوتوں میں سے ایک ہے۔ وہ ہمیں محفوظ رکھنے کے لیے اپنی راتیں اور زندگیاں قربان کر دیتے ہیں۔ ہمیں چاہیے کہ ہم اپنے ریاستی اداروں کی غزت و بقا کو اپنی غزت و بقا سمجھیں اور ہمیشہ متحد رہیں #PakistanIsAStrongNation https://t.co/MlOgo7BJIO	Pakistan has one of the most powerful military forces. They sacrifice their nights and lives to keep us safe. We should consider the growth and survival of our state institutions as our growth and survival and always remain united #PakistanIsAStrongNation https://t.co/MlOgo7BJIO	NIL	NIL	No_Hate
1558554660373397505	@jahangi34070804 خوبصورت خسرا اپنے عاشق کا دل تو خوش کر سکتا ہے پر بچے پیدا نہیں کر سکتا یہی حال کپتان کی 3 سالہ کارکردگی کا نچوڑ ہے یوتھیے تقریر سے خوش تو ہو سکتے ہیں لیکن خوشحال نہیں🤓 https://t.co/NMY5NXiQ97	@jahangi34070804 Beautiful measles can make the heart of its lover happy but can't produce children. This is the essence of the captain's 3-year performance Youths may be happy with the speech but not happy🤓 https://t.co/NMY5NXiQ97	NIL	NIL	Hate
1573204769141059584	1.فرانس میں سرکاری عمارتوں گستاخانہ خاکوں کی نمائش ہوئی لیکن عمران خان خاموش رہا 2. بھارت میں بی جے پی کی رکن نے توہین رسالت ﷺ کی عمران خان خاموش 3.شہباز حکومت نے ٹرانس جینڈر ایکٹ منظور کیا لیکن عمران خان خاموش #BringInnocentAafiaHome https://t.co/GURQsgTRTc	1. Government buildings in France displayed indecent sketches but Imran Khan remained silent 2. Imran Khan silent on blasphemy of Prophet ﷺ by BJP member in India 3. Shehbaz government passed the Transgender Act but Imran Khan is silent #BringInnocentAafiaHome https://t.co/GURQsgTRTc	فرانس ‌میں‌سر کاریعمارتوں‌گستاخانەخاکوںکی نمائش‌ہوئی لیکن عمران‌خان‌خاموشرہا 2 بھارتمیں‌ب یج پی کی ر کن ن‌تویین‌ر سالتتہ کی عمران‌خان‌خاموش 8 شہبازحکومتنٹر انس جینڈ رایکٹ منظور کیالیکن عمران‌خان‌خاموش 4 شہبازشر یف کی فرانسکیگستاخرسولصدرس ملاقاتہوئی لیکن عمران خان خاموش آخریەز بان اسلامکیدفاع میں کببولگی.؟	In France, the main buildings of the Gstakhana plans The exhibition took place but Imran Khan remained silent 2 BJP member Natwiner Salatta in India Imran Khan is quiet 8 Shehbaz Governor Ins Gend Rocket approved But Imran Khan is silent 4 Shehbaz Sharif's ambassador to France The meeting was held but Imran Khan remained silent When will you speak in defense of Islam?	No_Hate
1559801581444497409	افغانستان: طالبان وزارت دفاع کے مطابق مولوی مہدی افغان طالبان کے ساتھ ایک جھڑپ میں مارے گئے ہیں وزارت دفاع کے مطابق مولوی مہدی ہرات میں اس وقت مارے گئے جب وہ ایران جانے کی کوشس کر رہے تھے واضح رہے کہ مولوی مہدی طالبان کے پہلے شیعہ کمانڈر تھے جنکو اپنے علاقے کیلیے گورنر بنایا گیا https://t.co/LgGz94u1PK	Afghanistan: According to the Taliban Ministry of Defense, Maulvi Mehdi has been killed in a clash with the Afghan Taliban According to the Ministry of Defence, Maulvi Mehdi was killed in Herat while he was trying to go to Iran It should be noted that Maulvi Mehdi was the first Shia commander of the Taliban who was made the governor of his region https://t.co/LgGz94u1PK	NIL	NIL	No_Hate
1567498733637566464	چل دل میرے چھوڑ یہ پھیرے یہ دنیا جھوٹی لوگ لٗٹیرے https://t.co/I5wFqDkYBW	Leave my heart and turn it This world is looted by liars https://t.co/I5wFqDkYBW	NIL	NIL	No_Hate
1592027050306523136	سعودی لڑاکا طیاروں کی امریکی بمبار طیارے 'بی 52' کے ساتھ فضاؤں میں پرواز https://t.co/SPdgMqNvSd https://t.co/syi5ZCY2Gf	Saudi fighter jets fly in the air with the American bomber plane 'B52' https://t.co/SPdgMqNvSd https://t.co/syi5ZCY2Gf	العربیۃ اردو سعودی طیارے 'ایف 15 ایس ای' کی امریکی مبار طیارے 'بی 52' کے ساتھ فضاؤں میں پرواز	Arabiya Urdu American of Saudi aircraft 'F-15 SE' Flying in the skies with Mubarak aircraft 'B-52'	No_Hate
1558385525454782464	چوت اور چوتیا لوگ ہی فوج کے دوست ہوتے ہیں چوت ہی جرنیلوں سے کام نکلواتی #OfficialDGISPR @Imrankhanpti @OfficialDPRPP #امپورٹڈ_حکومت_نامنظور https://t.co/sgTMTKJ10g	Chaut and Chautia people are the friends of the army #OfficialDGISPR @Imrankhanpti @OfficialDPRPP #imported_government_disapproved https://t.co/sgTMTKJ10g	NIL	NIL	Hate
1567068261703110656	@RaheeqAbbasi اب اس جیسا چوتیئا بھی نام نہاد صحافی بن کر ایسا تجزیہ کرے گا اکھے کھاندی چھولے تے ڈکار باداماں دے بندہ پوچھے او دلے تیرا کیا سٹیک ہے پاکستان میں اور سیاست میں جا پہلے اپنے ناجائز باپ جاہل پادری کینیڈین بابا چابی والے کو بلا کر لا پاکستان میں بلا کنجرا https://t.co/hZqLrZniHu	@RaheeqAbbasi now a fourth person like him will be a so-called journalist and do such an analysis Akhey khandi chhole te dakar badaman de banda ask o dale what is your stake in Pakistan and go to politics first by calling your illegitimate father, ignorant priest, Canadian Baba Chabiwale, and bring it to Pakistan without sting https://t.co/hZqLrZniHu	NIL	NIL	Hate
1587742282937237505	ہم نے بڑے فریب میں کاٹی ہے زندگی مقصد تمام عمر کا فِکرِ معاش تھا https://t.co/NdAtZuxyo6	We have spent life in a big deception The goal was livelihood for all ages https://t.co/NdAtZuxyo6	NIL	NIL	No_Hate
1573724451140780032	ہم کو محسوس کیا جاتا ہے خوشبُو کی طرح ہم کوئی شـــور نہــــیں ہیں کہ سُنائی دیں گے!! وسیـــم بـــریلــویؔ #اپنی_زبان_اردو https://t.co/U7ob2RT3nm	We are perceived as scents We are not a noise that will be heard!! Waseem Barilvi #Apni_Zaban_Urdu https://t.co/U7ob2RT3nm	NIL	NIL	No_Hate
1593638672154480641	اسلام آ باد۔ ہم ڈاکٹرمحمدزمان عبداللہ ہنجرا سینیئر وائس چیئرمین پنجاب کو اعلیٰ کارکردگی پر آل پاکستان میڈیا کونسل گولڈمیڈل حاصل کرنے پر مبارکباد پیش کرتے ہیں۔ خیراندیش بشارت علی بھٹی مرکزی صدر آل پاکستان میڈیا کونسل https://t.co/ZBSwQab2h9 https://t.co/IWqLG6VHJ4	Welcome to Islam. We congratulate Dr. Mohammad Zaman Abdullah Hanjara Senior Vice Chairman Punjab for receiving the All Pakistan Media Council Gold Medal for excellence. Good luck Basharat Ali Bhatti Central President All Pakistan Media Council https://t.co/ZBSwQab2h9 https://t.co/IWqLG6VHJ4	ھب ََ ات سوحسٹت - ہہ قالااء ‎۲۲۳۶٠5‏ ۵۲۱:۱0۱۱۵۸۲ ۲م ۶	Hib َat suhstat - Huh Qala'a 223605 521:1011582 2m 6	No_Hate
1566169142679539713	#khatm_e_Nbwt_channel_News ڈاکٹر راغب نعیمی صاحب سے خلوص بھری ملاقات ، غازی محمد ثاقب شکیل جلالی صاحب کے ہمراہ قاری عبد الرحمن جلالی صاحب اور مولانا عمران حنفی صاحب موجود۔۔۔۔ https://t.co/3FbMlkumVV	#khatm_e_Nbwt_channel_News Sincere meeting with Dr. Raghib Naeemi, Ghazi Muhammad Saqib Shakeel Jalali along with Qari Abdul Rehman Jalali and Maulana Imran Hanafi were present. https://t.co/3FbMlkumVV	NIL	NIL	No_Hate
1587466592803241984	@J_SaqibNisar #حقیقی_آزادی_لانگ_مارچ یہ نادان لوگ کسی بھول میں ہیں یہ نانی 420 لندن بیٹھ کر بکواس بازی کرتی ہے اس کو تب پتا چلے گا جب لوگ ان کے اندر گھس کر پھٹیں گے ۔ ان کو یہ نہیں پتا جن کے بچوں پہ بمباری کا نے کروائی ۔ یہ قاتل لوگ ۔ https://t.co/uUbJEOMfnL	@J_SaqibNisar #true_freedom_long_march These ignorant people are in a state of oblivion, this old lady sitting at 420 London talking nonsense, she will know when people will burst into her. They don't know whose children were bombed. These are murderous people. https://t.co/uUbJEOMfnL	NIL	NIL	Hate
1562355840618680321	کبھی شہباز گل کے چہرے پر خراشیں اور گردن پر خراشیں دکھائی جاتی ہیں اور کبھی کسی اور کے جسم پر چوٹ کھائی جاتی ہے لیکن اس غریب عوام کا کیا قصور ہے جس کو بھی یارومددگار چھوڑ دیا گیا #بے_حس_پنجاب_حکومت https://t.co/bUQD1rqBFq	Sometimes scratches are shown on Shahbaz Gul's face and neck and sometimes someone else's body is hurt, but what is the fault of the poor people who were left without a helper? #Blessed_Punjab_Government https://t.co/bUQD1rqBFq	NIL	NIL	No_Hate
1581311975245504514	یا اللّه اس چہرے کو کل فاتح دلا دیں اور یہودی قادیانی اسرائیلی امریکی ایجنٹ عمران نیازی کو شرمندہ کرے امین #اسلحہ_فروش_امریکہ_بےلگام https://t.co/OztKyfuRKP	May Allah make this face victorious tomorrow and shame the Jewish Qadiani Israeli American agent Imran Niazi Amen	NIL	NIL	Hate
1593179651954081792	فریب ہے یہ آنکھ کا منظر ~ https://t.co/ZgeCiUA1r1	This eye view is delusional ~ https://t.co/ZgeCiUA1r1	NIL	NIL	No_Hate
1564587129161846790	مریم چورنی کیسے کرلیتی ہو یہ اداکاری کاپی کرنا ہی کام ہے یا کبھی خود سے بھی کچھ کام کیا یا بس صرف سب کو کاپی کرنا سیکھا اپنے گنجے شیطان باپ سے کہو تم کو اداکارہ بننا ہے سیاست میں ایکٹنگ ہر جگہ ہی لعنتیاں پڑتی ہیں ایسی حرکتوں پر https://t.co/NI59vdLX3t	Maryam Chorni how do you do this acting is copying or did you ever do anything yourself or just learned to copy everyone tell your bald devil father you want to be an actress Acting in politics curses everywhere. At https://t.co/NI59vdLX3t	NIL	NIL	Hate
1578744870067646464	🥰❤️٫٫تُم٬٬🥰❤️ جانتی ہو۔! مجھے کیا پسند ہے؟؟ پُھولوں کی خُوشبو،🥀❤️ سَچی مُحبت،♥️ چاندنی راتیں،😎 سچ بولنا،🙂♥️ کوئل کی کُوک،😍 بارش،😋♥️ کالا سُوٹ،❤️ پر سکون زندگی،♥️ اوراچھی شَاعری،🥰 اور سَب سے ذیادہ اس تحریر کا پہلا لفظ۔😘🥰 https://t.co/LcKiINFxqa	You You know! what do i like The fragrance of flowers, 🥀❤️ True love, ♥️ Moonlit nights, Tell the truth, 🙂♥️ Quail's Cook, 😍 Rain, 😋♥️ Black suit, ❤️ Peaceful life,♥️ And good poetry And most of all this First word of writing.😘😘 https://t.co/LcKiINFxqa	NIL	NIL	No_Hate
1614970209848156166	نام نھاد جمھوري گورنمينٹ میں سنڌ کے عظیم رھنما سائین جی ایم سید کے سالگرہ تقریب کو ناکام بنانے کیلئے پورے سندہ میں سنڌي قومپرست کارکنان کو گرفتار کیا جا رھا ھے سنڌ کے مختلف اضلاع میں قومپرست رھنماوں کے گھروں مین چھاپے مارے گئے ہیں #HBDSainGMSyed https://t.co/0YaUID0pXL	Sindhi nationalist workers are being arrested all over Sindh to thwart the birthday celebration of the great leader of Sindh, GM Syed, in the so-called republican government. Houses of nationalist leaders have been raided in various districts of Sindh #HBDSainGMSyed https://t.co/0YaUID0pXL	NIL	NIL	Hate
1608880500764209152	جنرلوں نے ٹرپل ایکس کو پاکستان کی تقدیر کیلئے فرشتہ بنا کر پیش کیا نواز شریف کو نااہل اور فتنے خان کی آف شور کمپنی کو منظر عام سے چھپایا ثاقب نثار اور ہمنواؤں نے فتنے خان کو دودھ کا دھلا صادق اور امین سرٹیفکیٹ جاری کیا وزیر اعظم بنوایا اور یوں ملک کی بربادی کے سفر کا آغاز ہوا https://t.co/K6bDWmoIvJ	The generals presented Triple X as an angel for Pakistan's destiny Nawaz Sharif was disqualified and Fitne Khan's offshore company was hidden from public view. Made the Prime Minister and thus began the journey of ruining the country https://t.co/K6bDWmoIvJ	NIL	NIL	Hate
1562996911883550721	جو لوگ عمران خان کواس لئےسپورٹ کرتےتھےکہ باقی چور ہیں،انکو عمران خان کے اثاثے بڑھنے،ممنوعہ فنڈنگ کیس میں ملوث ہونے،توشہ خانےسےچوری کرنےپرجان جاناچاہئےخان بھی چور ہے۔بس اسکو صرف 3 سال ہی ملےاور ابھی اس نےسارے طریقےبھی نہیں سیکھے۔ذرا سوچیں یہ بندہ کچھ عرصہ مزید رہ کر کیا گل کھلاتا https://t.co/lwUWofMnEU	Those who supported Imran Khan because the rest are thieves, they should be killed for increasing Imran Khan's assets, being involved in the prohibited funding case, stealing from the treasury. Khan is also a thief. He only got 3 years and he still hasn't learned all the tricks. Just think about it. The man would have stayed a little longer https://t.co/lwUWofMnEU	معران خان اود بشریٰ لی لی کے نے کے ہیں ؟ ای ںکی تفصیلات سان آگنیں	Who are Maran Khan and Bushra Lee Lee? Fire with these details	Hate
1606606087985442817	@DrTariqSultan @samiabrahim15 کہتا تھا جس نے نکالا اس سے لڑونگا ہزار سال وہ کم بخت تو باجوہ کے ایک ہی اشارے میں گر گیا کر کے وہ سو ڈرامے جو بھاگا تھا ملک سے وہ بے شرمی بے حیائی بےغیرتی کے گارے میں گر گیا ان منصفوں جرنیلوں زرداریوں شریفوں کی لوٹ مار سے ملک میرا مہنگائی بےروزگاری اور مالی خسارے میں گر گیا https://t.co/qygf91z383	@DrTariqSultan @samiabrahim15 used to say I will fight him for a thousand years He fell at a single gesture from the less fortunate Bajwa He ran away from the country after doing the hundred dramas He fell into the mud of shamelessness, indecency and disrespect From the looting of these fair generals Zardaris Sharifs The country plunged into inflation unemployment and fiscal deficit https://t.co/…	پ ات؟ بر 4 اه آ۵ا ٤د‏ کا ے۵ کل	P you Bur 4 Uh Come on 4 d of 5 yesterday	Hate
1573222916610826240	پاکستان کے لئے ایک اور بڑا اعزاز ✌️🇱🇾🇵🇰 وزیر خارجہ بلاول بھٹو زرداری نے دنیا کے نوجوان وزرائے خارجہ کی کانفرنس کی سربراہی کے بعد تنظیم تعاون اسلامی کے وزرائے خارجہ کے اجلاس کی بھی صدارت کی۔ @BBhuttoZardari https://t.co/ghZieGE0yN	Another big honor for Pakistan ✌️🇱🇾🇵🇰 Foreign Minister Bilawal Bhutto Zardari, after chairing the conference of young foreign ministers of the world, also chaired the meeting of foreign ministers of the Organization of Islamic Cooperation. @BBhuttoZardari https://t.co/ghZieGE0yN	NIL	NIL	No_Hate
1566328689356316672	بھارت فارن ایکسچیج ریزرو 642.45 ارب ڈالر کیساتھ دنیا کی پانچویں بڑی معیشت (گوگل) ہمارے فارن ایکسچینج ریزرو بمشکل صرف 15 ارب ڈالر دشمن بھارت طیارہ بردار بحری جہاز لانچ کر رہا اور ہماری تمام تر توجہ آج بھی معیشت بحالی بجائے #فتنہ_عمرانیہ جیسے خودکش معاشی جہاز لانچ کرنے پر ہے https://t.co/8x5DRCuvHU	India is the fifth largest economy in the world with foreign exchange reserves of 642.45 billion dollars (Google). Our foreign exchange reserves are barely 15 billion dollars Enemy India is launching an aircraft carrier And All our focus today is on launching suicide economic ships like #Fitnah_Umraniya instead of restoring the economy https://t.co/8x5DRCuvHU	NIL	NIL	Hate
1568888141599096832	مسٹر @antonioguterres امید ہے آپ خیریت سے ہونگے سر آپ سے مؤدبانہ گزارش ہے آپ ہمارے پورے سندھ کا چکر لگانا اور اس کے بعد اگر آپ تھوڑا زیادہ کسی سندھی کو دینا چاہتے ہیں تو ان مستحق افراد کو اپنے ہاتھوں سے کچھ دیں آپ جانتے ہیں ہمارے سیاستدان نمبر ون پر ہیں کرپشن میں شکریہ https://t.co/saIbKBKxJf	Mr @antonioguterres I hope you are well. Sir, I kindly request you to go around our entire Sindh and after that if you want to give a little more to a Sindhi, then give something to these deserving people with your hands. You know our politicians are number one in corruption Thanks https://t.co/saIbKBKxJf	NIL	NIL	Hate
1593749342745141248	@Iam_jillani @RebelByThought @FarazAhmad62 @OwaisMa09727398 یہ جلا ہوا گوشت اور ہڈی اتنی نظر تو سہی ہے میری 😏😏😒🤓🧐🥸 https://t.co/rGZsdb7jcN	@Iam_jillani @RebelByThought @FarazAhmad62 @OwaisMa09727398 This burnt flesh and bone looks so good 😏😏😒🤓🧐🥸 https://t.co/rGZsdb7jcN	NIL	NIL	No_Hate
1608335131537702912	سابق آرمی چیف قمر جاوید باجوہ چائے میں پاکستان ڈبو کر کھاتے تھے https://t.co/MVU1rQuu7v	Former Army Chief Qamar Javed Bajwa used to dip Pakistan in tea and eat it https://t.co/MVU1rQuu7v	NIL	NIL	Hate
1606493257084686337	بہاول پور ٹرانس جینڈر کا بہیمانہ قتل مارنے والے درندے نے معصوم بچے کو صرف اس لیے گولیاں مار دی کہ وہ اس کی ناجائز خواہش پوری نہ کر سکا معاشرے کی بے رحمی اور ستم ظریفی یہ ہے کہ اس دنیا میں جینے کا کمزور کو کوئی حق نہیں یہ درندگی کا سلسلہ کب تک چلے گا @OfficialDPRPP https://t.co/yA2h829WDI	The brutal killer of Bahawalpur transgender killed the innocent child only because he could not fulfill his illicit desire. How long will this brutality last? @OfficialDPRPP https://t.co/yA2h829WDI	NIL	NIL	No_Hate
1609050787975413761	ظلم کی انتہا۔۔۔۔۔ لاہور میں رہائش پذیر دیر بالا کے علاقہ عشیری درہ جبر سے تعلق رکھنے والے اس کم سن بچے کو اٹھانا اور پھر گردہ نکال کر فروخت کرنا اس ملک کے تمام اداروں اور خصوصا قانون نافذ کرنے والے اداروں کےلئے شرم کی بات ہے ۔۔ کاپی بشکریہ ۔۔مظہر الدین https://t.co/ZZhFoUkT6R	The end of cruelty. It is a matter of shame for all the institutions of this country and especially the law enforcement agencies to pick up this young child belonging to Ishiri Dara Jabr, an area of ​​Deer Bala living in Lahore, and then remove the kidney and sell it. Copy courtesy. Mazharuddin https://t.co/ZZhFoUkT6R	NIL	NIL	No_Hate
1578715515908157440	بهارت میں (بهگوان) اور پاکستان میں (شریف خاندان) دونوں جهوٹے ہیں. مگر یہ بات ادھر ہندو نہیں مانتے ِادهر پٹواری نہیں مانتے 😂🤣 #کپتان_ہم_آرہے_ہیں https://t.co/D79X4KN2jS	Both in India (Bahgwan) and in Pakistan (Sharif family) are false. But Hindus here do not believe this Adhar Patwari does not believe 😂🤣 #Captain_We_Are_Coming https://t.co/D79X4KN2jS	NIL	NIL	Hate
1574388837966647298	@MaryamNSharif یہ لڑکی اب غریدہ فاروقی کی جگہ شوباز کیساتھ راتیں گزارتی ہے۔ https://t.co/X8VDeSCU99	@MaryamNSharif This girl now spends nights with Shobaz instead of Ghareeda Farooqui. https://t.co/X8VDeSCU99	NIL	NIL	Hate
1598721563829731328	سنیوں خدارا ڈاکٹر صاحب کی قدر کرلو ۔زندگی میں قدر کرنے کا مزہ الگ ہوتا ہے ۔موت کے بعد تو غیر بھی گن گانا شروع کردیتے ہیں۔ https://t.co/TkPhm1vVCl	Appreciate the doctor. Appreciation in life is different. After death, even non-believers start singing. https://t.co/TkPhm1vVCl	NIL	NIL	No_Hate
1617796818624188419	گستاخ مگر کاٹ کھانے والی آنکھیں اور سیکسی بدن https://t.co/QzN97EOzSc	Cheeky but biting eyes and sexy body https://t.co/QzN97EOzSc	NIL	NIL	No_Hate
1578065986288328711	مسلم لیگ ن کی نائب صدر مریم نواز شریف لندن پہنچ گئیں، مریم نواز کے صاحبزادے جنید صفدر بھی ہمراہ۔ https://t.co/QdbqTcUAUy	PML-N Vice President Maryam Nawaz Sharif arrived in London. Maryam Nawaz's son Junaid Safdar also accompanied. https://t.co/QdbqTcUAUy	NIL	NIL	No_Hate
1561267267412934656	@CMShehbaz چل بوسڑی کی بچے گدھے کتا 🐕 حرامزادہ کمینے نکمے منہوس شکل والے https://t.co/Ks8OiSnRL5	@CMShehbaz Come on you bastards donkeys dogs 🐕 bastards scumbags ugly https://t.co/Ks8OiSnRL5	NIL	NIL	Hate
1596684288258342912	رسول ﷺ نے فرمایا : کیا میں تمہیں جہنمی لوگوں کے بارے میں نہ بتاوں ؟ ہر سخت مزاج ، بد اخلاق اور تکبر کرنے والا جہنمی ہے ۔ #خاتم_النبیین_محمّدﷺّ #صباح_الخير #قومی_زبان https://t.co/p6vq4SKSQj	The Prophet ﷺ said: Shall I not tell you about the people of hell? Every hard-tempered, ill-mannered and arrogant person is hellish. #Khatim_ul-Nabieen_Muhammad ﷺ #صباح_الخير #قومي_زبان https://t.co/p6vq4SKSQj	NIL	NIL	No_Hate
1572487387191844864	اقوام متحدہ کے ادارہ برائے پناہ گزین (یو این ایچ سی آر) کی نمائندہ خصوصی اور امریکی اداکارہ انجلینا جولی سیلاب سے متاثرہ افراد کی مدد کے لیے پاکستان پہنچ چکی ہیں۔ https://t.co/Pj8yPMmfir	United Nations High Commissioner for Refugees (UNHCR) and American actress Angelina Jolie have reached Pakistan to help the flood-affected people. https://t.co/Pj8yPMmfir	NIL	NIL	No_Hate
1567434429718577154	کوئی فلمی ہیرو نہیں جو آٹو گراف دینے آیا ھے۔ چھوٹا موٹا غنڈہ ھے سالا۔پولیس اسٹیشن دستخط کرنے آیا ھے۔ باجی راو سنگھم۔ https://t.co/ykifDszsmc	There is no film hero who has come to give autographs. The little fat thug is old. The police station has come to sign. Baji Rao Singham. https://t.co/ykifDszsmc	NIL	NIL	Hate
1596168259082100736	اسسٹنٹ کمشنر بالاکوٹ نے بازار، کھانے پینے کی دکانوں اور پٹرول پمپوں کا معائنہ کیا۔ پٹرول پمپ کے میٹروں کی چیکنگ کی گئی۔ خلاف ورزی کرنے والوں کو جرمانے کیے گئے، میعاد ختم ہونے والی اشیائے خوردونوش ضبط کی گئیں۔ https://t.co/Nrya3ZmXmL	Assistant Commissioner Balakot inspected the market, food shops and petrol pumps. Petrol pump meters were checked. Violators were fined, expired food items were confiscated. https://t.co/Nrya3ZmXmL	NIL	NIL	No_Hate
1562038501176406017	احمق سیاست دانوں! جتنا سیاست کو بدنام کیا جا سکتا تھا تم لوگوں نے کردیا اب بس بھی کرو تونسہ ڈوب رہا ہے بلوچستان ڈوب رہا ہے سندھ ڈوب رہا ہے میرا پاکستان ڈوب رہا ہے #TaunsaNeedsAttention @WHOPakistan @USAID_Pakistan @imf_pakistan https://t.co/8NPi3Zn5np	Stupid politicians! As much as politics could be discredited, you people did it Just do it now Tonsa is sinking Balochistan is sinking Sindh is sinking My Pakistan is sinking #TownsaNeedsAttention @WHOPakistan @USAID_Pakistan @imf_pakistan https://t.co/8NPi3Zn5np	NIL	NIL	Hate
1617462098291982337	سویڈن میں قرآن پاک کی بے حرمتی اور جلانے جانے کی شدید مذمت کرتے ہیں۔ قرآن پاک کی بےحرمتی ایک گھناؤنا اور ناقابل برداشت عمل ہے حافظ سعد حسین رضوی #Infidel_stopGlobalTerrorism https://t.co/lz8k5pqYCS	We strongly condemn the desecration and burning of the Holy Quran in Sweden. Desecration of the Holy Quran is an abominable and intolerable act Hafiz Saad Hussain Rizvi #Infidel_stopGlobalTerrorism https://t.co/lz8k5pqYCS	NIL	NIL	No_Hate
1593200962549985281	حقیقی آزادی مارچ وائس چیئرمین پاکستان تحریک انصاف مخدوم شاہ محمود قریشی بڑے قافلے کی قیادت کرتے ہوئے دینہ کے طرف رواں دواں۔ #WeTrustImranKhan #حقیقی_آزادی_لانگ_مارچ https://t.co/KS7om9Acyq	Real Freedom March Vice-Chairman Pakistan Tehreek-e-Insaf Makhdoom Shah Mehmood Qureshi led a large convoy and marched towards Dina. #WeTrustImranKhan #true_freedom_long_march https://t.co/KS7om9Acyq	NIL	NIL	No_Hate
1581505204771774466	@Asima33705120 @waqarsatti 14 پارٹیاں اور ایک عمران خان میں اس منحوس منافق کو کوئی فرق نظر نہیں آتا تو یہ اس میں آپ کو جھوٹ کی علاؤہ کچھ نظر نہیں آتا جو بیماری کے بہانے جھوٹ بول کر بھاگ گیا اس کی بیماری ان کو نظر نہیں آ رہی تو یہ بعض عمران خان میں مبتلاء۔ وقاص بھی اس کی طرح مر جائے گا بھونکتے بھونکتےتوبہ https://t.co/yvV0NvfV3J	@Asima33705120 @waqarsatti 14 parties and one imran khan this wretched hypocrite doesn't see any difference so you see nothing but lies in him The one who ran away with a lie on the pretext of illness, if they do not see his illness, then this is the case with Imran Khan. Waqas will also die like him Bark Bark Repent https://t.co/yvV0NvfV3J	بس سک آہ ۱ 4 ہس کےا مد ا اہ یڑ ا	Bus sik ah 1 4 Hissing is a long time ago A	Hate
1614461578979545088	اچھا بھلا motivational speaker تھا سب کُچھ ٹھیک چل رہا تھا پیسا بھی آ رہا تھا لوگ بُلا بھی رہے تھے، کس نے کہا تھا عمران خان کے خلاف اُنگلی کر؟ محترم آپ خود اپنی ٹوئی میں انگلی دے بیٹھے ہیں، یوتھ اب صرف اس اُنگلی کو ہلائے گی تاکہ آپ کو تکلیف ہو۔۔۔ https://t.co/UTa9bMee00	Well, he was a motivational speaker, everything was going well, money was coming in, people were calling, who said to point a finger at Imran Khan? Respected, you are putting your finger in your toe, youth will now only move that finger to hurt you. https://t.co/UTa9bMee00	NIL	NIL	Hate
1606599027990069249	رسول اللہﷺ نے فرمایا: ’’میری شفاعت ہر اس امتی کے لیے ہے جو شرک پر نہ فوت ہو۔‘‘ (سنن ترمذی:2441 ، بروایت: سیدنا ابوہریرہؓ) https://t.co/23k09KGHyq	The Messenger of Allah (peace and blessings of Allah be upon him) said: "My intercession is for every Ummah who does not die in Shirk." (Sunan Tirmidhi: 2441, Narrated by Sayyidna Abu Huraira) https://t.co/23k09KGHyq	NIL	NIL	No_Hate
1598583665830686720	ایس ایس پی آپریشنز کاشف آفتاب عباسی کی سربراہی میں کرائم ریویو میٹنگ شہریوں کے جان و مال کے تحفظ پر کوئی سمجھوتہ نہیں کیا جاسکتا، #سٹریٹ_کرائمز پر قابو پانے کےلئےجامع حکمت عملی اپنائی گئی ہے،سنگین جرائم کی تفتیش میں جدید ٹیکنالوجی کےاستعمال کویقینی بنانے کی ہدایت۔ #KPbuzz https://t.co/WmZPZKJsuO	Crime Review Meeting chaired by SSP Operations Kashif Aftab Abbasi There can be no compromise on the protection of life and property of citizens, a comprehensive strategy has been adopted to control #street_crimes, instructions to ensure the use of modern technology in the investigation of serious crimes. #KPbuzz https://t.co/WmZPZKJsuO	NIL	NIL	No_Hate
1565719742836621317	اگر محسوس کرو تو یہ ایک زناٹے دار تھپڑ ہے، اگر نا محسوس کرو تو بیغیرتی ہے. کیوں حاجی صاحب تے نواسہ صاحب؟ @OfficialDGISPR @BBhuttoZardari https://t.co/dHLmcy9KaL	If you feel it, it's a slap in the face, if you don't feel it, it's indifference. Why Haji Sahib and Nawasa Sahib? @OfficialDGISPR @BBhuttoZardari https://t.co/dHLmcy9KaL	اد یشک پاکستان کے سیلاب متاشری نکیل امدادگی سامان تی کااعلان	Pakistan's flood watcher Nikil Imdagi Declaration of goods	Hate
1608877151209811974	حقیقت تو یہ ہے کہ 2022 میں ہماری 75 سال سے فوج کی محبت میں بند آنکھیں بھڑوے باجوہ اور باجوہ کے ڈیتھہ اسکواڈ نیں کھول دیں اور جس فوج کو ہم پاکستان کا رکھوالا سمجھتے تھے اس فوج نیں اپنے حرام کی خاطر عمران خان کو مسند اقتدار سے اتار کر چوروں کو بٹھا کر پاکستان کا دیوالیہ کردیا😡 https://t.co/8GcUbNHgJM https://t.co/pAhHDR79rj	The fact is that in 2022, our eyes closed in the love of the army for 75 years were not opened by Bharve Bajwa and Bajwa's death squad and the army which we considered to be the guardian of Pakistan, this army did not allow Imran Khan to be the head of power. They took down the thieves and bankrupted Pakistan😡 https://t.co/8GcUbNHgJM https://t.co/pAhHDR79rj	1۱۶ ۱۱۹۷۸۰ ۸۸۸۲۷۹۲۱ ۲- ہم ‎0٢ 613۱۷۸۱۱۸۶‏ آپ کی دوائ یا پلڑکی رو آپلگی,نجلن مہنگی ہونے سے صرف اس حکومت کو فرق پڑے گا جو آپ کے ووٹ سے اقتدار میں آئے گی۔ آپ کی مرضی کے خلاف آئی حکومت کبھی آپ کی خیرخواہ نہیں ہوگی۔ :28 ]۲۸ ۰ ۲ 0, 0	116 119780 88827921 2- We 02 6131781186 Your medicine or eyelids will be expensive Being will only matter to the government which Will come to power with your vote. your will The government came against you It won't happen. :28] 28 0 2 0, 0	Hate
1573365223884464129	@Atifrauf79 پس ثابت ہوا کہ ایک ایماندار اور اچھی شخصیت کا حامل شخص ہی خارجی محاذ پر ملک کا مقدمہ بہترین انداز سے لڑ سکتا ہے۔ #PMPAKatUNGA https://t.co/VjcEobc29p	@Atifrauf79 So it has been proved that only an honest and good person can fight the cause of the country in the external front. #PMPAKatUNGA https://t.co/VjcEobc29p	وڑ را نعل پاکتان مھ شبانشریفکی ام 0-29 ایک وق ت تام )ا مین پاکنتان سے وزیرانٹ کا ون ٹیس اٹھا جا تھاءادرگرران خان ای کی دنک را لطہ کے لے ماراماراپچھرر پاتھا۔	Wada Ra Naal Pakatan Meh Shabanshrifaki Um 0-29 At one time, the Waziristan's one from Main Pakintan The tess was lifted by the dinka ra lata of the Durgarran Khan e Le Maramararapchharar patha.	No_Hate
1617832397743194113	آج بہت سردی ہے بستر سے نکلنے کا دل نہیں کر رہا کاش کوئی گرم کرنے والا ہوتا😐😔 https://t.co/XECfXXdUYT	It's so cold today, I don't feel like getting out of bed Wish there was a heater😐😔 https://t.co/XECfXXdUYT	NIL	NIL	Hate
1587323856733483009	ڈپٹی کمشنرنارووال محمد شاہ رخ نیازی کی زیر صدارت ڈسٹرکٹ ایمرجنسی ریسپانس کمیٹی کااجلاس منعقد کیاگیا۔متعلقہ محکموں کی شرکت۔انڈور،آؤٹ ڈور ایکٹیوٹیز، قبرستانوں زیر تعمیر بلنڈنگز، سروس اسٹیشنز، کمرشل بلڈنگز ہاٹ سپاٹس پر ڈینگی سرویلینس کےعمل کومزید تیز تر کرنےبارےاحکامات صادر کیےگئے۔ https://t.co/Z0gnkccY3n	A meeting of the District Emergency Response Committee was held under the chairmanship of Deputy Commissioner Narowal Muhammad Shahrukh Niazi. The participation of the relevant departments. Orders were issued to speed up the dengue surveillance process at indoor and outdoor activities, cemeteries, under-construction buildings, service stations, commercial buildings and hot spots. . https://t.co/Z…	NIL	NIL	No_Hate
1578799455842684928	زیر *نظر تصویر* میں ایک *درندہ ماں کو مار کر منہ* میں *دبوچ چکا* لیکن *کمال محبت ہے* اس *بندر کے بچے* کی جو *ماں کو موت کے منہ میں بھی تنہا نہیں چھوڑ* رہا ۔ پس *ثابت ہوا رشتے کسی حال میں اور کسی بھی مجبوری میں چھوڑ دینے کے لیے نہیں بناۓ* گئے ,,,!! https://t.co/M29QqVJOPA	In the below *picture*, a *beast has killed the mother and put it in her mouth* but *there is great love* for this *baby monkey* who is not leaving the mother alone even in the face of death. So * it is proved that relationships are not made to leave under any circumstances and under any compulsion* ,,,!! https://t.co/M29QqVJOPA	NIL	NIL	No_Hate
1566091923584073728	@ammarmasood3 حرام زادے حرام خور چور حرام زادے غدار لفافے پھر بولا گالیاں کھانے کے لیے۔ https://t.co/NUYR2yElnK	@ammarmasood3 Haramzade Haram Khor Thief Haramzade Traitor envelopes then said to abuse. https://t.co/NUYR2yElnK	NIL	NIL	Hate
1567741691376898048	کھیل کو مسلمانوں کے درمیان نفرت ، افتراق ، بغض و عداوت اور گالی گلوچ کا زریعہ نہیں بننا چاہیے۔اسلام کی نسبت سے دستبردار ہو کر ایک دوسرے کی قومیت کو نشانہ بنانا بھی انتہائ مذموم فعل ہے۔یاد رکھیں رسول اللہ صلی اللہ علیہ وسلم تمام مسلمانوں کو ایک امت بنا کر گۓ تھے۔ #BanAsifAli https://t.co/paWN9mo0Kk	Sports should not become a source of hatred, division, enmity and abuse among Muslims. Targeting each other's nationality by abandoning Islam is also an extremely reprehensible act. Remember the Messenger of Allah, peace and blessings be upon him. Muslims were made a nation. #BanAsifAli https://t.co/paWN9mo0Kk	NIL	NIL	No_Hate
1577937051109965826	یہ سفید داڑھی ٹوپی والے بابا جی فقیر گل صاحب ہیں، آج صوابی کی عدالت میں بابا جی نے فائرنگ کر کے اپنے بیٹے کے قاتلوں کو قتل کر دیا. فقیر گل قتل نہ کرتا تو اور کیا کرتا؟ پانچ سال پہلے دو افراد نے اس کے جوان بیٹے کو سب کے سامنے نیچے بیٹھے تمام ججوں کو فقیر گل کا یہ تھپڑ اپنے منہ https://t.co/d0DQecOQmF	This is Babaji Faqir Gul Sahib with a white beard and cap. Today, Babaji killed his son's murderers by shooting in the court of Swabi. If Faqir Gul did not kill, what else would he do? Five years ago, two people slapped his young son in front of everyone sitting down in front of all the judges.	یااللہ پاکستان کی حفاظت فرماء سب کی عزتیں محفوظ فرما ‎٥4۴36607‏ ندال	May Allah protect Pakistan and protect everyone's honor Do it 54436607 Nadal	Hate
1580830555095998465	سکھر کی شان ہر دلعزیز لیڈر ایم پی اے سید فرخ خورشید شاہ صاحب نے نیوپنڈ کے مختلف علاقوں پٹھان کالونی شھباز کالونی اور احمد نگر کا دورا کیا اور اس موقع پر پارٹی ورکروں سے تعزیت بھی کی ۔ @BBhuttoZardari @AseefaBZ @farukh_shah https://t.co/Ac7ixSo53Q	Honorable leader of Sukkur MPA Syed Farrukh Khursheed Shah Sahib visited different areas of Pathan Colony, Shehbaz Colony and Ahmednagar of New Pand and also condoled with the party workers on this occasion. @BBhuttoZardari @AseefaBZ @farukh_shah https://t.co/Ac7ixSo53Q	NIL	NIL	No_Hate
1616853064027193345	@Ch_ShujatHusain پولیو ٹیم سے گزارش ہے، دو قطرے اس لقوہ مارے کھسی بڈھے کو پلا دیں، بہت سالوں سے اپاہج کتے کی طرح موت کا انتظار کر رہا ہے۔ اور کسی عید کے دن کتے کی موت مر کے پورے خاندان کی عید خراب کر دے گا https://t.co/cotoZ6sc6g	Request @Ch_ShujatHusain Polio team, give two drops to this sick old man, waiting for death like a crippled dog for many years. And the death of a dog on an Eid will ruin the Eid of the whole family https://t.co/cotoZ6sc6g	NIL	NIL	Hate
1568112974518165504	#بلوچستان میں مسنگ پرسنز کے نام پر معصوم #بلوچوں کو پہاڑوں پر ریاست کے خلاف ٹریننگ کون دے رہا ہے؟حقیقت یہ ہے کہ مسنگ پرسنز کی اکثریت اس وقت #بلوچ دہشت گرد تنظیموں کے پاس ہے۔ مسنگ پرسنز کے نام چورن بیچنا بند کرو۔ کوئی مسنگ پرسنز نہیں سب ڈرامہ ہے۔ #BalochistanIsPakistan https://t.co/DNm1HmWwch	Who is training innocent #balochs in the name of missing persons in #Balochistan against the state on the mountains? The fact is that majority of missing persons are currently with #baloch terrorist organizations. Stop selling stolen goods to missing persons. No missing persons, all drama. #BalochistanIsPakistan https://t.co/DNm1HmWwch	NIL	NIL	No_Hate
1598661408908083200	#داتا_کا_وارث_امام_جلالی جلالی صاحب جن پہ نہ تو چندے کرپشن کا الزام نہ ہی انہوں نے عوام کو علماء کا گستاخ بنایا ہمیشہ اصحاب و اہلبیت کی مدح سراٸی کی https://t.co/4UjedDtUAI	#Data_Ka_Wars_Imam_Jalali Mr. Jalali Neither of whom is accused of corruption Nor did he make the people proud of the scholars Always praise the Companions and Ahl al-Bayt https://t.co/4UjedDtUAI	اریت وقت یہ نرہ اماںكی گ بوالی مت چا ے کہ برصحابی ۶ ذٔبی جسی جسی اگ ایماای بانا جاتج ہو بلرک ے ١٦١ای‏ چوط(ار ے ”ٗ جاو	At this time, this is not a dream Don't say that Bersahabi 6 Zabi Jassi Jassi Ag emai bana jataj ho Bullock 161-e Chut(ar-ey)	No_Hate
1564950967568957445	@AamerPTI یوتھیے اس طرح کے نمبرز سے روز میرے بھائی مجھے سعودی عرب سے کال کرتے ہیں ۔ لگے رہو پہلے پٹواری میں سوچنے کی صلاحیت نہیں تھی۔ اب تم بھی زومبیز بن چکے #پاک_فوج_ہماری_ریڈ_لائن #اسلامی_نظام_حکومت https://t.co/nrV1JOI3Zx	@AamerPTI These are the numbers my brother calls me everyday from Saudi Arabia. Lage Raho Earlier Patwari did not have the ability to think. Now you too have become zombies #Pak_Forge_Our_Red_Line #Islamic_System_Government https://t.co/nrV1JOI3Zx	NIL	NIL	Hate
1593200300328128512	مارچ میں لاکھوں لوگ لانے والے اسکول کی اسمبلی جتنے بچے بھی نہ لاسکے، عمران خان کے ارد گرد سازشی لوگ ہیں: فیصل واوڈا https://t.co/qJUmJAIPVH https://t.co/cphGV1Yr4e	Even if the school assembly that brought millions of people in March could not bring as many children, there are conspirators around Imran Khan: Faisal Vawda https://t.co/qJUmJAIPVH https://t.co/cphGV1Yr4e	NIL	NIL	No_Hate
1567448578540408832	اے اشک نہ کر ظلم ذرا دیر ٹھہر جا اک شخص ابھی میری نگاہوں میں بسا ہے https://t.co/w3QGWazAro	Oh, don't be ashamed, cruelty, stay a little longer One person has caught my eye right now https://t.co/w3QGWazAro	0 ,۳۱(,۱۷۷۴۳۵)) 1,1۳۵۶ فدہ نم ا عون[	0,31(177435)) 1,1356 Fida Nama Aoun[	No_Hate
1563984423858716673	کاش یہ خزانہ کھانے والا درندہ آج میچ میں ہوتا بھارتی ٹیم کے سارے کھلاڑیوں کو زندہ چبا جاتا #منحوس_حکومت https://t.co/73w9ntL5Mz	If only this treasure-eating beast was in the match today, all the players of the Indian team would have been chewed alive #अनहूस_गुव्याण https://t.co/73w9ntL5Mz	ا371أة	A 371 woman	Hate
1575395159080140803	پی ٹی آئ کے جلسوں میں لڑکیاں سپلائ کرنے والا بروکر سینیٹر فیصل جاوید اور بروکر کو ہم پشتو میں " دلا " کہتے ہیں https://t.co/vy5HKwjDNC	Senator Faisal Javed, the broker who supplies girls to PTI rallies and we call the broker "Dilla" in Pashto https://t.co/vy5HKwjDNC	NIL	NIL	Hate
1558668554932822017	وطن سے محبت مومن کی نشانی ہے امام حسین علیہ السلام مالک برحق وطن عزیز کو ہر قسم کے داخلی اور خارجی دشمنان سے محفوظ رکھے #جشن_آزادی__مبارک https://t.co/szOstkkaD5 https://t.co/1MBkPFse5j	Love of country is a sign of a believer Imam Hussain (peace be upon him). Protect the beloved country from all kinds of internal and external enemies #Jewish_Azadi__Happy Birthday https://t.co/szOstkkaD5 https://t.co/1MBkPFse5j	NIL	NIL	No_Hate
1563514261301006339	فوج اس سیلابی صورتحال میں ہماری خدمات میں مصروف ہیں وہ ہر مشکل وقت میں ہمارے ساتھ کھڑی ہوتی ہے #FloodsInPakistan https://t.co/LspCDkvQjP	Army is engaged in our services in this flood situation, they stand by us in every difficult time #FloodsInPakistan https://t.co/LspCDkvQjP	NIL	NIL	No_Hate
1559900690360705030	@waddiAapa @smeera82263782 یہی خبیث عورت ادھر دیکھیں کیا کہ رہی ہے۔ https://t.co/fOQGx2NkNk	@waddiAapa @smeera82263782 Look what this evil woman is saying. https://t.co/fOQGx2NkNk	5 ابی می تھی می جب فو نے ری کیل وڑی بھی ۔ ا لے پاپاکو چیک فو پر فص سے	5 Abhi me thi me jab fu recal vara too Ale papako check pho on phos	Hate
1593666468679491584	دیوبندی مکتبۂِ فکر کےمعتدل مزاج عالمِ دین مولانا مفتی رفیع عثمانی جہان فانی سے کوچ کرگئے۔آپ مرحوم مفتی شفیع عثمانیؒ کے بیٹے اورمفتی تقی عثمانی کے بھائی تھے۔اللہ تعالیٰ انکی دینی خدمات کوشرف قبولیت عطافرمائے اورسرکاردوعالمﷺ کی شفاعت نصیب کرے۔آمین ثم آمین #مفتی_رفیع_عثمانی https://t.co/vxisYP1BCc	Maulana Mufti Rafi Usmani, a moderate scholar of the Deobandi school of thought, has passed away. He is the son of the late Mufti Shafi Usmani and the brother of Mufti Taqi Usmani. #Mufti_Rafi_Uthmani https://t.co/vxisYP1BCc	NIL	NIL	No_Hate
1580109806442270720	چوہدری خرم شہزاد ورک اپنے کپتان کے ساتھ عزت اور ذلت اللہ پاک کے ہاتھ میں ہیں ہیں https://t.co/zrmVZVZTiQ	Chaudhry Khurram Shahzad Work With his captain Honor and disgrace are in the hands of Allah https://t.co/zrmVZVZTiQ	NIL	NIL	No_Hate
1614491927075848193	اہل کراچی ! ظلم سہہ کے ظالموں کو اور نا ثبات دو #Vote4Tarazu_Vote4HafizNaeem https://t.co/kvlSnR41ie	People of Karachi! Give more instability to the oppressors of oppression #Vote4Tarazu_Vote4HafizNaeem https://t.co/kvlSnR41ie	NIL	NIL	No_Hate
1593286147563732993	بلدیاتی انتخابات ، وزیراعظم ہاوس الیکشن آفس میں تبدیل ، ٹاپ بیورکریسی بھی ہمنوا ، گزشتہ رات ہونے والے پروگرام میں خطیر رقم کے لالچی منصوبوں کی بندر بانٹ سمیت ترقیاتی پیکجز کے اعلانات ، الیکشن کمیشن کی جانب سے جاری ضابطہ اخلاق ؟ اپوزیشن بھی خاموش۔ وجہ کیا ہے ؟ https://t.co/Hjy2V0A1da	Municipal elections, the Prime Minister's House has been changed to the Election Office, the top bureaucracy is also the same, in the last night's program, the announcements of development packages including monkey distribution of greedy projects, the code of conduct issued by the Election Commission? The opposition is also silent. What is the reason? https://t.co/Hjy2V0A1da	NIL	NIL	Hate
1592905082336514049	الطاف حسین بھائی پر سے غیر آئینی پابندی ختم کی جائے جئے مہاجر جئے الطاف حسین #AltafIsRight @AltafHussain_90 https://t.co/HvogL1laUa	The unconstitutional ban on Altaf Hussain Bhai should be removed Jai Mahajir Jai Altaf Hussain #AltafIsRight @AltafHussain_90 https://t.co/HvogL1laUa	پچ ہج لض0)۸۳70۳۵)) 077ا لد	Pitch Hajj (0) (837035)) 077 A Lad	No_Hate
1614956040952643588	مودی کی اسلام دشمنی، بھارت میں ایک اور تاریخی مسجد کو شہید کردیا گیا https://t.co/I9ojKwBBEh #NewsPakistanUR #newpakistantv #newspakistan #UTERPARDESH #Islamophobia #Anotherhistoricmosquewasdemolished #Tweeter #videoviral https://t.co/bCSEUg5oaF	Modi's Islamophobia, another historic mosque in India was martyred https://t.co/I9ojKwBBEh #NewsPakistanUR #newpakistantv #newspakistan #UTERPARDESH #Islamophobia #Anotherhistoricmosquewasdemolished #Tweeter #videoviral https://t.co/bCSEUg5oaF	NIL	NIL	No_Hate
1562904562771435522	@KhawajaMAsif چپ کر بوسڑی کی بچے گدھے کتا 🐕 حرامزادہ اپنی لیول کی مطابق بات کرو عمران خان کی پاؤں کی خاک برابر بھی نہیں ھو تم جو ھے https://t.co/NyvI7ApXbW	@KhawajaMAsif Shut up you old woman donkey dog ​​🐕 Bastard talk according to your level you are not equal to the dust of Imran Khan's feet https://t.co/NyvI7ApXbW	NIL	NIL	Hate
1574411170299416581	کبھی بھی انسان کا کیریکٹر نہیں بدل سکتا میری نظر میں صرف ایمان ہی انسان کا کیریکٹر بدل سکتا ہے۔ چیئرمین عمران خان #الیکشن_واحد_حل #امپورٹڈ_سیٹ_اپ_نامنظور #WeStandWithVcGCU https://t.co/nD7wdcHe4S	A person's character can never be changed In my view, only faith can change a person's character. Chairman Imran Khan #election_single_solution #imported_setup_disallowed #WeStandWithVcGCU https://t.co/nD7wdcHe4S	NIL	NIL	No_Hate
1566696797384413184	ایک ویڈیو وائرل ہوئی ہے. جس میں ٹک ٹاکر صندل خٹک اور گل چاہت پر ملائشیا میں جسم فروشی کا الزام لگا گیا ہے. https://t.co/bPpgkaJ8pp	A video has gone viral. In which Tik Tok Sandal Khattak and Gul Chahat have been accused of prostitution in Malaysia. https://t.co/bPpgkaJ8pp	NIL	NIL	No_Hate
1578966196866920458	یہ محض ایک مسجد کی ہی بنیا دی اینٹ ہی نہیں بلکہ امریکہ سمیت امن عالم کی بنیاد بھی ہے۔ انشا اللہ #خلافت_احمدیہ #مسجد_احمدیہ #امن_عالم https://t.co/iYLXsYUZud	It is not just the foundation of a mosque, but also the foundation of peace, including America. InshAllah #Khilafat_Ahmadiyya #Ahmadiyya Mosque #peace_world https://t.co/iYLXsYUZud	NIL	NIL	No_Hate
1567512672723165187	ہمارا مشن صحت مند پنجاب ڈی جی پنجاب فوڈاتھارٹی شعیب جدون کی ہدایت پر بہاولنگر کے مختلف داخلی اور خارجی راستوں پر ناکہ بندی کر کے دودھ بردار گاڑیوں کی چیکنگ کی۔ غیر معیاری دودھ ترسیل کرنے والی گاڑیوں کو جرمانے عائد کر دئے گئے @shoaibjadun @PFAHQOfficial @SouthPfa @DcBahawalnagar https://t.co/ISwALiMG9J	Our Mission Healthy Punjab On the instructions of DG Punjab Food Authority, Shoaib Jadoon, various entrance and exit routes of Bahalangar were blocked and milk carrying vehicles were checked. Penalties were imposed on substandard milk delivery vehicles @shoaibjadun @PFAHQOfficial @SouthPfa @DcBahawalnagar https://t.co/ISwALiMG9J	NIL	NIL	No_Hate
1566088878217478146	موبائل کے بغیر زندگی ایسےہی ہے 😶 جیسے چیز کے بغیر پیزا ، کھٹے کے بغیر گول گپے ، مایونیز کے بغیر شوارمہ ، ہری چٹنی کے بغیر چکن فرائز ،۔ اور فرائیڈ چکن کے بغیر ریپس ۔۔ وغیرہ وغیرہ 🙄🙄..!! #داستان_دل https://t.co/ORvXVEdx9l	Life without mobile is like this Like crustless pizza, round gape without sourness, Shawarma without mayonnaise, Chicken Fries Without Green Chutney. And wraps without fried chicken. Etc Etc 🙄🙄!! #Dastan_Dil https://t.co/ORvXVEdx9l	NIL	NIL	No_Hate
1561295014856122368	جب آپ کتاب اٹھاتے ہیں تو آپ کو بندوق رکھنا پڑتی ہے۔۔ 🙂 https://t.co/yfHznUSF7q	When you pick up a book, you have to hold the gun. 🙂 https://t.co/yfHznUSF7q	گ2 2 یں 1 7 1 ۳ اتل 2 2 ار“ 1 ك۵ چے ۱ ۔ 0 8 ۱ اج ل88۳0×. 80 0 (۵۷ “۳ ۳ 07 ٦	G2 2nd 1 7 1 3 Atal 2 2 1 to 5 1. 0 8 1 Aj For 8830×. 80 0 (57 "3 3 07 6	No_Hate
1593117076495159296	باجوڑ میں سیکیورٹی فورسز اور دہشتگردوں کے درمیان فائرنگ کے تبادلے میں ایک دہشتگرد ہلاک ہوگیا، جبکہ پاک فوج کے دو اہلکار شہید ہوگئے۔ آئی ایس پی آر کے مطابق ہلاک دہشتگرد سے اسلحہ اور گولہ بارود بھی برآمد ہوا . #PakArmy #ISPR #Bajaur https://t.co/ozjIHAfyvg	A terrorist was killed in the exchange of fire between security forces and terrorists in Bajaur, while two Pakistan Army personnel were martyred. According to ISPR, arms and ammunition were also recovered from the slain terrorist. #PakArmy #ISPR #Bajaur https://t.co/ozjIHAfyvg	اح ٹ :یدک فید نے اک ر00 گرویا ۵۵011۷۷۲۹۹۸۰۰۰۲ ۱۷۸۷۷۷۷۰۰۵۵۳ (۱۱۹۷۷۶ ۲۱۱۷۱۸ :۲۳۵ہ5)	Aht: Yidak fed one R00 Guruya 550117729980002 178777700553 (119776 211718:235H5)	No_Hate
1568924804048191488	@FawadPTIUpdates @fawadchaudhry آج رات نیازی کھان کھوتا پھر بھک مانگے گا #کیاسب_کویوتھیاسمجھ_رکھاہے https://t.co/rmE1x5wcQF	@FawadPTIUpdates @fawadchaudhry Tonight Niazi will lose food and then beg #Kyaasab_KoyoThiaSmjh_Rakhahe https://t.co/rmE1x5wcQF	آجکیل ھک ما تک ا ک۸ عالت 7 07) ے نہ ‎7٦‏	Aajkil Hak Ma Tak A K8 Alat 7 07) No 76	Hate
1617121945195274251	سیشن کورٹ گوادر کی جانب سے پانچ مقدمات میں گرفتار حق دو تحریک کے کارکن تاج محمد کلانچی کی ضمانت منظور ہونے پر آج کرائم برانچ کوئٹہ سے ان کو رہا کردیا گیا ہے۔ #Quetta @HDT_Balochistan https://t.co/tORcnQeKDj	Haq Du Tehreek activist Taj Muhammad Kalanchi, who was arrested in five cases by the Sessions Court Gwadar, has been released from the Crime Branch Quetta today. #Quetta @HDT_Balochistan https://t.co/tORcnQeKDj	NIL	NIL	No_Hate
1563509305911181313	یہ پہاڑی ڈہولکی سیاست کر رہی گشتی ہٹی بند حرام خور لانتی کی اس عمر میں کہوتہ نہ دیکہے رنڈی طوائف کی طرف لانتی ؟ https://t.co/GAPdSUo2kF	It is said that in this age of the police who are doing the politics of hillbilly, the bandit, the bandit, the haram khor are being brought to the prostitutes. https://t.co/GAPdSUo2kF	NIL	NIL	Hate
1578063018155560964	عمران خان صاحب نے جو کچھ پاکستان کے نوجوانوں کو سکھایا، سمجھایا، پڑھایا اب امتحان کا وقت شروع ہونے والا ہے۔۔۔۔ تیار رہو،،،،❤️❤️✌️ #FinalCall https://t.co/PtgHwGObmJ	What Imran Khan has taught, explained and taught to the youth of Pakistan, now the time of examination is about to begin. Be prepared,,,,❤️❤️✌️ #FinalCall https://t.co/PtgHwGObmJ	NIL	NIL	No_Hate
1564945267677347844	&amp;&amp;آرمی چیف جنرل قمر جاوید باجوہ نے سوات میں سیلاب سے متاثرہ علاقوں کا دورہ کیا اور کالام، بحرین، خوازہ خیلہ اور مٹہ میں ریلیف آپریشن کی سرگرمیوں کا جائزہ لیا۔ #COASAppeal #PakArmyRelFund https://t.co/vGTdz6KNA6	Army Chief General Qamar Javed Bajwa affected by flood in Swat Areas visited and in Kalam, Bahrain, Khwaja Khila and Matta Reviewed the relief operation activities. #COASAAppeal #PakArmyRelFund https://t.co/vGTdz6KNA6	چےے-ے "' ۶۳۱۸۷۸۲۰۱۷۰۱۴۰۶4 ۱ _ آدء جرجرد80۵۸5 -ٗتک-ک<_. آئی ایس پی آر نے کہا کہ امدادی اشیاء کی وصولی اور تقسیم کے حوالے سے کوششوں کو ہم آہنگ کرنے کے لیے ملک بھر میں کلیکشن پوائنٹس قائم کیے جا رہے ہیں۔	Chey-e "' 6318782017014064 1 _ Ad Jarjard 80585 -ٗtak-k<_. ISPR said that the recovery of relief items and To coordinate distribution efforts Therefore, collection points are being established across the country are	No_Hate
1565759863950643203	کپتان نے الٹی شلوار پہنی ہو یا نہی اب کاپی ماسٹر نانی ضرور الٹی شلوار پہن کر آئے گی #بےشرم_حکومت_لفافہ_میڈیا https://t.co/ux6dvbe2XI	Whether the captain is wearing Alti Shalwar or not, now Copy Master Nani will definitely come wearing Alti Shalwar #Shameless_Government_Envelope_Media https://t.co/ux6dvbe2XI	NIL	NIL	Hate
1566427824545796104	آئی مس یو باباجی!یہاں سب غدار اور چور ایک ہی ہیں پاکستان کو نوچ نوچ کر کھانے والے گستاخوں کو رہا کرنے والے وعدوں کو توڑنے والے ملک کو لوٹنے والے!😥 https://t.co/WsHbPobAcL	I miss you Babaji! Here all the traitors and thieves are the same, those who eat Pakistan by scratch, those who free the brazen ones, those who break promises, those who rob the country!😥 https://t.co/WsHbPobAcL	٦٢ ٤ ٤ ٢ 2 ‎]٣۸ ٢٢‏ ٴ5 ‏۲ء ‎1	62 4 4 2 2 [38 22 5 2 1	Hate
1598670194007744513	یہ کتا وہی ہے نہ جو جہاز سے ننگی تصویریں پھینکتا تھا بینظیر کی https://t.co/RbTsjPf3DN	This dog is not the one who used to throw nude pictures of Benazir from the plane https://t.co/RbTsjPf3DN	NIL	NIL	Hate
1576298089769734145	خسرا پرویز بٹ کی سنی لیون سے ملاقات کے بعد کام کا فیصلہ ۔۔۔۔ https://t.co/F5rlZFaw8c https://t.co/FX90h37mq0	Khusra Parvez Butt's decision to work after meeting with Sunny Leone. https://t.co/F5rlZFaw8c https://t.co/FX90h37mq0	NIL	NIL	Hate
1608343332098539522	عمران خان کو جو بھی نیچے دکھائے گا وہ تباہ و برباد ہو جائے گا عمران خان کے اوپر جو بھی پی ٹی آئی کو اچھا لگے گا وہ تباہ و برباد ہو جائے گا عمران خان کے چھوڑ کے جائے گا وہ بھی تباہ و برباد ہوگا عمران خان ایک ہیرا ہے اس کے اوپر دنیا کی چوچا لے لیکن وہ چمکتا رہے گا انشاءاللہ کیونکہ https://t.co/xBimV4nOOu	Whoever shows down to Imran Khan will be destroyed. Anyone who likes PTI above Imran Khan will be destroyed. If Imran Khan leaves him, he will also be destroyed. It's a diamond, let the world take care of it, but it will continue to shine, God willing, because https://t.co/xBimV4nOOu	NIL	NIL	Hate
1564263645315571713	خیرات چور پی ٹی آئی والے پاکستان کے اصل دشمن ہیں #پاکستان_کےغدار_بے_نقاب https://t.co/iGZWTWPzDU	Charity thieves PTI are the real enemy of Pakistan #Pakistan_Keghadar_Bay_Naqab https://t.co/iGZWTWPzDU	NIL	NIL	Hate
1560144854075801608	پنجگور یونیورسٹی آف مکران میں منعقدہ صوبائی وزیر میراسد اللہ بلوچ کی کوششوں سے لیپ ٹاپ تقسیم تقریب صوبائی وزیر نے کہا ہے کہ ہمیں ترقی کی راہ میں والدین واساتذہ کی دعاں کے ساتھ انکی احترام وتکریم سے کامیابی ملتی ہے بلوچستان میں واحد ضلع پنجگورہے جہاں اعلی تعلیمی ادارے ہیں https://t.co/uFnIbkEvL7	Laptop distribution ceremony held at Panjgur University of Makran by the efforts of provincial minister Mirasadullah Baloch, the provincial minister has said that we succeed in the path of development with the prayers of parents and teachers and their respect and honor. Panjgur is the only district in Balochistan where higher education Institutions are https://t.co/uFnIbkEvL7	NIL	NIL	No_Hate
1594172840453935104	آپ سرفراز احمد سے چاہے کسی بھی وجہ سے نفرت کرتے ہوں لیکن جس طرح سے انہوں نے ٹی وی شو میں بیٹھنے کی بجائے اپنے بلے سے جواب دینے کا فیصلہ کیا، اس کی عزت بڑھ گئی♥️🔥🇵🇰 #cricket #SohailSports @SarfarazA_54 @TheRealPCB https://t.co/0RRTxbFJfo	You may hate Sarfraz Ahmed for whatever reason but the way he decided to respond with his bat instead of sitting on a TV show has earned him respect♥️🔥🇵🇰 #cricket #SohailSports @SarfarazA_54 @TheRealPCB https://t.co/0RRTxbFJfo	NIL	NIL	No_Hate
1568340437345206274	@hinaparvezbutt یہ جلسہ کرنے نہیں جاتی یہ مریم فتنا اپنے لیے مرد تلاش کرنے جاتی لاکھو مرد کو چود چکی ہے پھر بھی یہ ٹھنڈی نہیں ہوتی مریم فتنا سے پوچھ ہر روز کتنے مردو کے ساتھ منہ قالا کرتی یہ دوٹکے کی رن حینا بٹ مریم فتنا اور بہت ساری طوئفو کو کتنے پسیہ دیتی ہے مریم فتنا کنجری کا پتر نواز حرامی ک https://t.co/jiGQIEbbvB	@hinaparvezbutt She doesn't go to meetings, this Maryam Fitna goes to find a man for herself. She has fucked a million men, yet she is not cool. Ask Maryam Fitna how many men she used to have sex with every day. How much does Maryam Fitna Kunjri's letter to Nawaz Harami k https://t.co/jiGQIEbbvB	NIL	NIL	Hate
1565735154383044610	بلاول صاحب جمهوریت کے دعویدار یہ تصویر دیکھ لو یہ علی وزیر ہیے جو دوسال سے ریاست پاکستان اور اپکے سندھ حکومت کے حکم پر بے گناہ جیل میں قید ہیں یہ تصویر جمہوریت اور ریاست کو جھوٹا ثابت کرنے میں کلیدی کردار اداکرہاہیں کے پاکستانيوں میں جمہوریت نہیں ہیں ؟ #ReleaseAliWazir https://t.co/5fyn7jPnpQ	Bilawal, the claimant of the republic, look at this picture. This is Ali Wazir, who has been imprisoned for two years by the order of the state of Pakistan and his Sindh government. ? #ReleaseAliWazir https://t.co/5fyn7jPnpQ	NIL	NIL	Hate
1572888181544222725	الحمد والشكر اللۂ پاکستانیوں مبارک ہو مرشد عمران خان نیازی صاحب عدالت میں بھی سرخرو باقی PDM کرائے کے ٹٹوؤں اور خاص طور پر ننگی لیگ کی گیراجن بھگوڑی ضمانت پر رہا مجرمہ کی چیلیوں کے بھونکنے کا ٹائم ہو چاہتا ہے شروع ہو جاو https://t.co/JFaBW76Yvu	Alhamdulillah and thanks to Allah, congratulations to the people of Pakistan The rest of the PDM hired ponies and especially the bare league garage runaway bailed out criminal chicks want to bark. Let's start https://t.co/JFaBW76Yvu	1.	1.	Hate
1567448740474114048	ان ڈرامے بازوں کو پاکستانی عوام نے بری طرح مسترد کر دیا ھے۔۔ #سستا_الطاف_حسین https://t.co/MfBcziJAbQ	These playwrights have been badly rejected by the people of Pakistan. #ساستا_الطاف_حسين https://t.co/MfBcziJAbQ	: آرمی حیف عصران خان کے دو سجبلے ا رمی جیب سامنے آکئے	: Army Haif Asran Khan's Two Sajable Armi Pockets Come forward	Hate
1595736150425182209	75 سالہ تاریخ میں پہلی مرتبہ سید اور حافظ قرآن پاکستان آرمی چیف ۔۔۔۔ ویلکم سر اللّٰہ ربّ العزت پاکستان کی اور پاک فوج کی اہل اسلام کی حفاظت فرمائے کفار پرست سیاستدانوں پر قہر عظیم نازل فرمائے آمین ثم آمین یا رب العالمین https://t.co/KD3tWfktqV	For the first time in the 75-year history of Syed and Hafiz Quran Pakistan Army Chief. welcome sir May Allah Almighty protect Pakistan and the people of Islam May great wrath be sent down on infidel politicians, Amen, then Amen, Lord of the worlds https://t.co/KD3tWfktqV	NIL	NIL	Hate
1563514518247915523	اللَّهُمَّ لَا تَقْتُلْنَا بِغَضَبِكَ ، وَلَا تُهْلِكْنَا بِعَذَابِكَ وَعَافِنَا قَبْلَ ذَلِكَ اے اللہ! تو اپنے غضب سے ہمیں نہ مار، اپنے عذاب کے ذریعہ ہمیں ہلاک نہ کر، اور ایسے برے وقت کے آنے سے پہلے ہمیں بخش دے https://t.co/yOcrc6Pt5c	O Allah, do not kill us with your anger, and do not destroy us with your punishment. O Allah! So do not kill us with your anger, do not destroy us with your punishment, and forgive us before such an evil time comes https://t.co/yOcrc6Pt5c	NIL	NIL	No_Hate
1574399198010740739	میری حیا کو اسلام نے محفوظ رکھا اور میرا ایمان قرآن نے مضبوط رکھا، الحمدللہ ہم مسلمان ہیں۔ https://t.co/NCUAAATV9j	My modesty was protected by Islam and my faith was strengthened by the Quran, Alhamdulillah we are Muslims. https://t.co/NCUAAATV9j	NIL	NIL	No_Hate
1566689444459053057	نیشنل ڈیموکریٹک موومنٹ انشاء اللہ اپنے علاقے کے سیاسی کارکن کی سیاسی پیاس بجھائے گی۔ @NDM_Official ہمارے قوم کے ٹیلینٹیڈ نوجوانوں کو وہ موقع فراہم کرے گی جو ان کے ٹیلینٹ کے شایانِ شان ہوگا جو ان کی قابلیت کو سامنے لائے گا. نیشنل ڈیموکریٹک موومنٹ مراثی سیاست کی خاتمہ کر گی. https://t.co/rPAe4Bdp6k	National Democratic Movement, God willing, will quench the political thirst of the political workers of their region. @NDM_Official will provide the talented youth of our nation with the opportunity which will be worthy of their talent which will bring out their potential. The National Democratic Movement will end Marathi politics. https://t.co/rPAe4Bdp6k	NIL	NIL	Hate
1566062666518601729	کندن ہوئے ہیں آ گ ہی اپنی جلا کے ہم ہم پہ کسی سنار کی مرضی نہیں چلی #مرشد @pk5125 https://t.co/Ieo5Jig0JZ	We have been burned by fire No goldsmith's will was done to us #Murshid @pk5125 https://t.co/Ieo5Jig0JZ	NIL	NIL	No_Hate
1560929773718847490	پی ٹی آئ کا پروپیگنڈا نوجوانوں کے ذہنوں کو تباہ کر رہا ہے کوئی سچی بات بھی ہضم نہیں ہو پاتی ان سے #DisqualifyImranKhan https://t.co/95D1uztHks	PTI's propaganda is destroying the minds of the youth, they cannot digest any truth. #DisqualifyImranKhan https://t.co/95D1uztHks	NIL	NIL	Hate
1593856236222648326	خان کہوں تو پٹھان بھائی ناراض نیازی کہوں تو میانوالی کے بھائی ناراض ہوتے ہیں ہن تسی دسو ایس کھوتے نوں کی آکھاں ؟؟😁 https://t.co/JMnQXKRMvt	If I say Khan, then the Pathan brothers get angry, if I say Niazi, the brothers of Mianwali get angry Han tsi dosu s khotena ki akhaan ??😁 https://t.co/JMnQXKRMvt	NIL	NIL	Hate
1608339601986289664	@MusarratCheema عمرانی حکومت کے مشیر تجارت عبد الرزاق کا 3 مئی2021 کا یہ بیان عمران نیازی ،اسدعمر،حماداظہر،فواد چوہدری وغیرہ اور یوتھیوں کے جھوٹ پر لعنت بھیج رہا ہے جو آج بکواس کرتے پھرتے ہیں کہ ہمارے دور میں تو مہنگائی تھی ہی نہیں، معیشت بہت اچھی تھی اور اچھا بھلا ملک امپورٹڈ کے حوالے کردیا https://t.co/1S5mzXSNNf	This statement of @MusarratCheema, Advisor to the Imrani government on trade, Abdul Razzaq, on May 3, 2021, is cursing the lies of Imran Niazi, Asdamar, Hamad Azhar, Fawad Chaudhry, etc. The economy was very good and the country was handed over to imported goods https://t.co/1S5mzXSNNf	علومت ملک میں مہنگا نی پر قابد پانے ہیں زاکا مر بھی ہے : مم جار تکا اعتراف ۳۳م 202107:21,/(ہ۱۸ 93 06 ‎6٤‏ طاەزامانں٣‏	Science in the country to control the cost of money Hain zaka mur bhi hai : mum jar taka Confession 33 AD 202107:21,/(H18 93 06 64)	Hate
1580889939750707200	روس اور ترک راہنماوں کی کئی ماہ میں چوتھی ملاقات، مغرب کی تشویش تفصیل پڑھیں: https://t.co/5wZSBPLc54 https://t.co/TLK75zyt0L	Fourth meeting in as many months between Russian and Turkish leaders, concerns West Read the details: https://t.co/5wZSBPLc54 https://t.co/TLK75zyt0L	NIL	NIL	No_Hate
1581699266938310656	مسلم لیگ ن کے بے وقوف کہتے ہیں کہ باجوا اور نیازی کا آپس میں جھگڑا ہوگیا ہے یہ کیسا جھگڑا تھا کہ ممنوعہ فنڈنگ میں نا قابل تردید ثبوتوں کے ہوتے ہوے الیکشن کمیشن نے اپنا فیصلہ نہیں سنایا اور ہر کیس میں ضمانت دیتے گیے پنجاب کی حکومت واپس آمران نیازی کے جھولی میں ڈال دی https://t.co/1JWrj1fraG	The fools of PML-N say that Bajwa and Niazi have quarreled with each other. What kind of quarrel was it that despite the irrefutable evidence in the prohibited funding, the Election Commission did not pronounce its decision and in every case, the Punjab government will give bail. Put back in the cradle of Amiran Niazi https://t.co/1JWrj1fraG	NIL	NIL	Hate
1578652023532441601	@DrFouziaHameed @KamalPSP @AneesPSP @NaikMuhammadkhi @DrArshadAVohra @straightfromdk @pspcentralpunjb اگر صحیح وقت پر کنڈم استعمال ہوتا تو نہ دانش پیدا ہوتا اور تو 😂😂😂 https://t.co/bWfqe9yFEs	@DrFouziaHameed @KamalPSP @AneesPSP @NaikMuhammadkhi @DrArshadAVohra @straightfromdk @pspcentralpunjb If kundam was used at the right time, wisdom would not have been born and so 😂😂😂 https://t.co/bWfqe9yFEs	0۴ :جا اد003۸ ٦ے‏	04 : Ja ad0038 6e	Hate
1563242336880328704	سلیکٹڈ بولا، حقیقی جمہوریت کا علمبردار بن گیا یہودی ایجنٹ بولا، اسلاموفوبیا کا دن منظور کروا آیا ناتجربہ کار بولا، بین الاقوامی سطح کے منصوبے لے آیا غیر مقبول بولا، نگر نگر، گلی گلی کا لیڈر بن گیا ناکام سیاستدان بولا، 13 جماعتوں پہ اکیلا بھاری ہو گیا #عمران_خان_ہماری_ریڈ_لائن https://t.co/G36jQy2zCI	Selected spoke, became the pioneer of true democracy The Jewish agent said, Islamophobia Day has been approved Inexperienced spoke, brought international level projects Unpopular Bola, Nagar Nagar, became the leader of Gali Gali The failed politician said, he became heavy on 13 parties alone #Umran_Khan_Our_Red_Line https://t.co/G36jQy2zCI	مع ہکزور ہو ت کھانا جشمم خی ہوتا و لگمزژور ہو نز پانی جشمم نیس ہوما اور گر بندہ چور ہو عمرا نان مضم خی ہوم	If you are hungry, the food will be tasty and delicious Ho naz pani jashmam nis homa and gir banda choor ho Umra naan muzum khi home	Hate
1560921179443134464	پاکستانی پاسپورٹوں کا جلانا اور پاکستان کی بہادر افواج، آئی ایس آئی اور عدلیہ کے بارے میں منفی پروپیگنڈا ناقابل برداشت ہے۔ پوری قوم اس کی مذمت کرتی ہے۔ ایسے لوگوں کے خلاف سخت ایکشن لیا جائے.. !!! #NoArmyNoPakistan #behindyoubajwa @Sidra_474 https://t.co/3WV0anT5Ad	The burning of Pakistani passports and negative propaganda about Pakistan's brave forces, ISI and judiciary are intolerable. The whole nation condemns him. Strict action should be taken against such people.. !!! #NoArmyNoPakistan #behindyoubajwa @Sidra_474 https://t.co/3WV0anT5Ad	NIL	NIL	No_Hate
1581318522067513347	امریکی صدر کی بکواس کا جواب صرف عمران خان جیسا بہادر اور خوددار لیڈر ہی دے سکتا ہے 💪💪💪امریکا کے صدر نے جو بکواس کریں اسکے بعد سے GHQ والے منہ چھپاتے پھررہے ہیں ISPR بغیرتی کی حدیں عبور کررہا ہیں سب کے سب دالال پاکستان ہیں کوئی مخلص نہیں وردی والے غدار #کپتان_کرےگا_کلین_سویپ https://t.co/sIo17hms5c	Only a brave and independent leader like Imran Khan can answer the nonsense of the US President 💪💪💪 GHQ people are hiding their mouths ever since the US President said nonsense. #Captain_Will_Clean_Sweep https://t.co/sIo17hms5c	آى آپ کےسا سے دوراۓ ‏ یں : ایگ مشگل مگر عظمت گا راستھ دوسرا آسان مگر تباہی کا راسته	Let's go to Kesa: It's busy, but greatness will come Another easy but destructive path	Hate
1594127629161996288	@PSPPakistan @KamalPSP حرامزادہ کمالو بھروا . آج کل بھکاری بھیک مانگ رہا ہے ے حرامی بھتاخور قاتل بلدیہ فیکٹری کا قاتل کنجر قائم کھانی ے سب بھڑوے ہیں مہاجروں پہچانو ان حرامیوں کو پہچانو ں ے اوہی دلال ہیں جنو ں نے 30 سال تک مہاجروں کو بلا شرکت غیرے لوٹا مارا ان پر تھوکو ں . آخ تھو بحنچود https://t.co/NxEM76FVIS	@PSPPakistan @KamalPSP bastard Kamal Bharwa. Today, the beggar is begging for alms. . Akh Thu Bhanchud https://t.co/NxEM76FVIS	NIL	NIL	Hate
1614309001336066048	*لبنان پر اسرائیل کی ڈرون جارحیت، ملا منہ توڑ جواب* لبنانی فوج نے صیہونی دشمن کے جارح ڈرون طیارے پر فائرنگ کی۔ سحر نیوز/ عالم اسلام: لبنانی فوج کی طرف سے اسرائیلی ڈرون کو نشانہ بنانے کے بارے میں متضاد رپورٹس کی اشاعت کے چند لمحوں بعد، ایک لبنانی میڈیا آؤٹ لیٹ نے ملک (1/4) https://t.co/ht7cva5DjV	* Israel's drone attack on Lebanon, received a shocking response * The Lebanese army opened fire on the aggressive drone aircraft of the Zionist enemy. Sahar News/Alam Islam: Moments after the publication of conflicting reports about the Lebanese army shooting down an Israeli drone, a Lebanese media outlet reported that the country (1/4) https://t.co/ht7cva5DjV	NIL	NIL	No_Hate
1573231537566650368	حجاز مقدس: جمعیت علماء اسلام ف کے مرکزی سیکرٹری جنرل فخر جمعیت سینیٹر مولانا عبد الغفور حیدری صاحب عمرہ کی ادائیگی کے دوران غلافِ کعبہ کی تیاری میں حصہ لیتے ہوۓ۔ https://t.co/C7LlrkAVf7	Holy Hijaz: Jamiat Ulema-e-Islam Central Secretary General Fakhr Jamiat Senator Maulana Abdul Ghafoor Hydari during performance of Umrah Participating in the preparation of the cover of the Kaaba. https://t.co/C7LlrkAVf7	NIL	NIL	No_Hate
1593651101286502401	سیکیورٹی فورسز کا خفیہ اطلاعات پر بلوچستان کے علاقے ہوشاب میں آپریشن، 2 دہشتگرد جہنم واصل https://t.co/OARa9p9nXs @OfficialDGISPR https://t.co/dIdpLCk74g	Operation of security forces in Hoshab area of ​​Balochistan based on secret information, 2 terrorists were killed https://t.co/OARa9p9nXs @OfficialDGISPR https://t.co/dIdpLCk74g	سلیورٹی فو رکا خفیہاطلاعات پ4 2ے شگ رینم وسل	Confidential information P4 2nd Shug Renam Wasl	No_Hate
1563836254231347202	@JavedIq52509706 @mubasherlucman جلسہ اسے کہتے ہیں اپنی تصویر کو زوم کرو تمھیں خود ہی شرم آئے گی اگر یوتھیا ہے تو کچھ نہیں ہوسکتا #گستاخوں_کایارعمران_خان https://t.co/9pW8Nwhp8K	@JavedIq52509706 @mubasherlucman jalsa call it zoom your picture you will be ashamed of yourself if uthiya is there nothing can happen #Gastakhon_KayarImran_Khan https://t.co/9pW8Nwhp8K	NIL	NIL	Hate
1568243489225457666	یہ تو اس فاحشہ سے بھی آگے نکل چکی ہے جو کپڑے پھاڑ کر پرچہ کروانے کی دھمکی دے کر پلاٹ نام لگوا لیتی ہیں۔ لیکن اس کی گیدڑ بھگتیوں سے صرف جج اور نیب والے ہی ڈرتے ہوں گے خان کا تو کردار صاف ہے اور خان کا ماضی اس وقت بھی صاف تھا جب اسے پلے بواۓ سے تشبیح دی جاتی تھی تو اب تو با کرداری، https://t.co/GrHk0z560z	It has even gone beyond the prostitute who threatens to tear her clothes and get a paper called a plot. But only judges and NAB people will be afraid of his jackals. Khan's character is clean and Khan's past was clean even when he was likened to a playboy, so now he has a character, https://t .co/GrHk0z560z	ران مان یاد رکھو سے میں وڈاوز دکھاکر ہلان ہورسے ہو نوم رگ نواز کے پا میں اپیے الیےے جو اب ہیں و ۓکیلنۓ لان اگر مر مم نوازفواز شر لی کی ترببیتء اخلاتی اقرار کے ساتھ نہ ہوثی تق سمیں پاکتتان ت وکیا ری	Ran Maan remember me by showing videos Horse ho naam rag nawaz ki pa mein apye ileye jo now They are the ones who are trained by Nawaz Fawaz Shirley With the acceptance of Akhalati, neither the Hussites nor the sects were purified	Hate
1577627961162866688	سوشل میڈیا کا زیادہ استعمال، چھ ماہ کے اندر نوجوانوں ذہنی تناؤ پیدا کرسکتا ہے https://t.co/lPBt2yEHFm https://t.co/ZAMMw7jzmd	Excessive use of social media can lead to depression in teenagers within six months https://t.co/lPBt2yEHFm https://t.co/ZAMMw7jzmd	NIL	NIL	No_Hate
1573895851038150657	پہنچی خاک وہیں پر جہاں کا خمیر تھا @TariqJamilOFCL ، سب سے بڑی مذہبی طوائف گرونانک کے پاس #وزیراعظم_نہیں_لعنتی_اعظم https://t.co/oDGrPhrXDj	The dust is where the leaven was, @TariqJamilOFCL, the biggest religious prostitute at Gurunanak. #WaziraAzam_No_Laanti_Azam https://t.co/oDGrPhrXDj	داتا علی ہجویری رحمۃ اللہ علیہ کے مزار پر حاضری دیتے ہوئے ات وت آ تی ہے لوک یہان شدویٰ نہیں بچلتا	Attending the shrine of Data Ali Hajwiri At vat aati hai Lok Yahan Shadva does not escape	Hate
1564219153124311040	اوئے بہن چودو۔اوئے بغیرتو۔عدالت کے دلالو کب سوموٹو ایکشن لو گے ۔۔تم سے تو ھیرا منڈی کے دلال بھی غیرت مند ھوتے جو کم از کم اپنے کوٹھے پر آنچ نہیں آنے دیتے ۔یہ تو ملک کی سالمیت کا معاملہ ھے ۔ @kabeerraja786 @MalikRi62751771 @AnsarAAbbasi @HamidMirPAK @Matiullahjan919 @jahanpanah65 https://t.co/fHuHlOYZj6	Oy Behn Chodo. Oy Bhaijito. When will the pimps of the court take sumoto action. Even the pimps of the diamond market would be jealous of you, who at least do not let the fire come to their room. This is a matter of the integrity of the country. @kabeerraja786 @MalikRi62751771 @AnsarAAbbasi @HamidMirPAK @Matiullahjan919 @jahanpanah65 https://t.co/fHuHlOYZj6	NIL	NIL	Hate
1573905204554207232	ایک تمہارا پٹھان ہے شیطانی چہرے والا ایک ہمارا پٹھان ہے نورانی چہرے والا اگر شیطانی چہرے والے کے ہاتھ میں سیاست آجائے وہ گندی ہو جاتی ہے اگر نورانی چہرے والے کے ہاتھ میں آجائے وہ پاک ہو جاتی ہے #TLP_Promotion @TLP234 https://t.co/n0mAaUk6qf	One is your Pathan, the one with the devilish face is our Pathan, the one with the light face, if politics comes into the hands of the one with the evil face, it becomes dirty, if it comes into the hands of the one with the light face, it becomes pure. #TLP_Promotion @TLP234 https://t.co/n0mAaUk6qf	NIL	NIL	Hate
1564944286071853057	لشکر گاہ ھلمند میں آزادی کی تقریب کا ایک منظر الحمدللہ ❣️ https://t.co/eAj1MQCiBF	A scene from the independence ceremony at Lashkar Gah Helmand Alhamdulillah ❣️ https://t.co/eAj1MQCiBF	NIL	NIL	No_Hate
1587454533307101185	ایک گراجن مجبور کرتی ہے کہ اسے بھی وہی الفاظ سے نوازا جائے جو وہ خود اپنے منہ سے گند بکتی ہے غلاظت اور بدبودار سے بھری ہوئی بوٹ پالشن کی عوام میں دو ٹکے کی عزت نہیں اور اپنے آپ کو لیڈر سمجھی بھیٹی۔ #حقیقی_آزادی_لانگ_مارچ https://t.co/9QpiiAbz0N	A Garajan insists that she too be blessed with the same words she herself spews from her own mouth Filled with filth and stench, the boot police has no respect for the public and considers itself a leader. #Haqqiqi_Freedom_Long_March https://t.co/9QpiiAbz0N	وا مذارو نکر چۓ ے۔ ٹس ‎١‏ سلا مآ اد پا کور تع ِ رت ےی بت ےھ وع سے یں نے سے زنک ار کاپان رک پوس 2.7-7 کے سم ٗ' يِ ر4	What did you say? Tis 1 Salma ad pakor ta'irtei bat This is the first time I've been there According to 2.7-7	Hate
1572893344208158720	@G_i_defender @SHR_KHR786 @SeharShinwari لنگڑے دھشتگرد کے چیلو، ابھی چابی نہیں گھومی لیکن اگر گھوم گئی تو پھر سب کچھ جلانا ہوگا اسلئے ٹؤٹر چھوڑو اور تھوڑ پھوڑ اور مسلمان کو کافر کہنے کی ٹریننگ شروع کرو۔ https://t.co/YgWIrGvhl8	@G_i_defender @SHR_KHR786 @SeharShinwari you lame terrorists, the key has not turned yet but if it does then everything will have to be burnt so quit twitter and start training to call a Muslim a kafir. https://t.co/YgWIrGvhl8	NIL	NIL	Hate
1578048579305889792	بےخوف ہو کر حتمی کال کی تیاری کرے، #کپتان_قوم_تیار_ہے عوام کا جواب۔ #FinalCall #امپورٹڈ_حکومت_نامنظور @PTIofficial @ImranKhanPTI https://t.co/nOgb95LFDr	Be fearless and prepare for the final call, #Kaptan_Quom_Tiyar_Hae is the answer of the people. #FinalCall #imported_government_disapproved @PTIofficial @ImranKhanPTI https://t.co/nOgb95LFDr	NIL	NIL	No_Hate
1614974091877916674	میں آپ ہی کا تو مسئلہ ہوں🖤 مجھ کو سوچئیے، حل نکالئیے۔ https://t.co/EnFssL4u1D	I am your problem Think me, find a solution. https://t.co/EnFssL4u1D	NIL	NIL	No_Hate
1564569457175023616	اے اللہ ہم تیری ہی عبادت کرتے ہیں اور تجھ ہی سے مدد مانگتے ہیں اور تو ہی عزت و ذلت دینے والا ہے اور تجھ سے ہی پیار کرتے ہیں اور تجھ سے ہی محبت کے طلبگار ہیں اور تیری ہی توحید پر یقین رکھتے ہوں اور تجھ پر بھروسہ کرتے ہیں ہم تیری رضا چاہتے ہیں تیرے غضب سے ڈرتے ہیں 👇1/2 https://t.co/KFiGDlFc8E	O Allah, we worship You alone and seek help from You, and You alone give honor and humiliation, and we love You alone, and we seek love from You alone, and we believe in Your Oneness and You alone. trust We want your pleasure and fear your wrath 👇1/2 https://t.co/KFiGDlFc8E	NIL	NIL	No_Hate
1564573504015581184	جس کو انگلی پکڑ کے چلاتے تھے، اُس نے اکیلے ہی پانچ ارب روپے اکٹھے کر لیے پاکستانیوں کے کیے اور اب جس کو انگلی دے کے کھڑا کیا ہوا، اس کو کوئی ایک دھیلا بھی نہیں دے رہا 💕 @ImranKhanPTI 💕 #ImranKhanForPakistan #بغیرت_بڈھی #عمران_خان_ٹیلی_تھون_مہم https://t.co/zZ6wiDmsbU	The one who used to hold his finger, he single-handedly collected five billion rupees for Pakistanis And now the one who was raised by giving a finger, no one is giving him a single leeway 💕 @ImranKhanPTI 💕 #ImranKhanForPakistan #without_badhi #Umran_Khan_Tele_Thon_Campaign https://t.co/zZ6wiDmsbU	ہماری 3 ہماری جان 7 عمران خان وج 'پ	Our 3 Our soul 7 Imran Khan Waj' p	No_Hate
1558436484650344448	ان غداروں کو مٹا دینا ھی ملک کی سلامتی ھے پاک فوج اور وفاق ملکر اپنے ملک کے پرچم کی سر بلندی کے لیے میدان میں اتریں انڈیا امریکہ اسرائیل کے کارندوں کو ملک سے مٹائیں ھم پاکستانی پی ٹی آئی کے پرچم کو پیشاب سے دھو کر عمران خان نیازی غدار کے منہ پر ماریں پاکستان زندہ باد https://t.co/pc3JOLjyr5	To wipe out these traitors is the security of the country. Pakistan Army and Federation should join the field to raise the flag of their country. India, America, wipe out the operatives of Israel from the country. Let us wash the flag of Pakistani PTI with urine. Hit the traitor's face Long live Pakistan https://t.co/pc3JOLjyr5	NIL	NIL	Hate
1580573082213056512	چور ڈاکو کے نعرے لگاتے اس جاہل اور گنوار ٹولے کی آنکھیں اور دماغ فرح گوگیوں، توشہ خانے جیسے ڈاکوں کی طرف سے بند ہیں۔ انہیں صرف شریف فیملی پر چاؤں چاؤں کرنے کےلیے دیہاڑی پر رکھا گیا ہے #بے_شرم_یوتھیے https://t.co/9f7ApyJ5mi	The eyes and minds of this ignorant and mischievous group shouting slogans of thieves and robbers are blocked by dacoits like Farah Gogis, Toshakha. He has been kept on day labor only to cheat on the Sharif family #बे_शरम_युथीये https://t.co/9f7ApyJ5mi	NIL	NIL	Hate
1566645728675610625	@AQuddusBizenjo ہوسکتا ہے کہ آج صوبہ بلوچستان ضلع ڈیرہ بگٹی سوئی تحصیل کے دورے پر آئے آپ سے گزارش ہے کہ ضلع ڈیرہ بگٹی سمیت سب تحصیل پیرکوہ کا بھی دورہ کریں اور اپنے آنکھوں سے دیکھ لے کہ مسلسل بارشوں نے پورے پیرکوہ کو کھنڈر بنا دیا 1/2 @iFarahAzeemShah @CMShehbaz @ShahabSpeaks https://t.co/gfbiiM4mA9	@AQuddusBizenjo May be today Balochistan province will come to visit Dera Bugti Sui tehsil, I request you to visit all tehsil Pirkoh including Dera Bugti district and see with your own eyes that the continuous rains have made the entire Pirkoh a ruin 1/2 @iFarahAzeemShah @CMShehbaz @ShahabSpeaks https://t.co/gfbiiM4mA9	NIL	NIL	No_Hate
1558884141915115529	میاں صاحب آپ اتنے بڑے لیڈر ہیں یہ عمران خان کے چھوٹے موٹے جلسے آپ کی شایان شان کے مطابق نہیں کوئی اپنی بیٹی کی بنائی ہوئی کسی جج کی پورن ویڈیو دیکھو کسی جرنل کی دیکھو کسی سیاستدان کی ننگی ویڈیو دیکھو 🤣🤣🤣🤣🤣 @MaryamNSharif @hinaparvezbutt https://t.co/rSZEw2PwoY	Mian sir, you are such a great leader These small gatherings of Imran Khan are not according to your dignity Someone made by his daughter Watch a porn video of a judge Look at some journal, look at a nude video of a politician 🤣🤣🤣🤣🤣 @MaryamNSharif @hinaparvezbutt https://t.co/rSZEw2PwoY	NIL	NIL	Hate
1609052258750156800	’ناقابل فراموش ایڈونچر‘، رونالڈو کا سعودی عرب کے کلب ’ال نصر‘ سے معاہدہ #AlNassr #Ronaldo𓃵 #SaudiArabia #UrduNews مزید تفصیل: https://t.co/PsjV5sEh66 https://t.co/ivrKeOL2gt	'Unforgettable adventure', Ronaldo's contract with Saudi Arabian club 'Al Nasr' #AlNassr #Ronaldo𓃵 #SaudiArabia #UrduNews More details: https://t.co/PsjV5sEh66 https://t.co/ivrKeOL2gt	رونالی وکا سج دی رب کپ لے حا	Ronali Vaka Saj Di Lord Take the cup	No_Hate
1562951433716396037	@KhawajaMAsif خان تو ٹھیک کھڑا ہوا ہے۔ بس تجھ جیسے مادر چود کی آنکھوں پر بغض کی پٹی چھڑی ہوئی ہے۔ تیری حرام کی کمائی ھو بند ہو گئی تھی خان کے دور میں۔ کسی گندی نسل کے حرامی پین یک کتا۔ https://t.co/WB7ggxbqJk	@KhawajaMAsif Khan has stood up well. Just like you, Mother Chud has a blindfold of hatred on her eyes. The earning of your haram was stopped during the reign of Khan. A bastard dog of a dirty breed. https://t.co/WB7ggxbqJk	NIL	NIL	Hate
1617276142880169988	رجیم چینج آپریشن اب تک جاری ہے، یہ بے شرم نیوٹرلز جن چوروں کو اقتدار میں لے کر آئے تھے لگتا ہے کے ان ہی کی سپورٹ جاری رکھے ہوئے ہیں نقوی انہی کا بغل بچہ ہے اور پنجاب یہ لوگ کپتان سے چھینننے کا ارادہ رکھتے ہیں ہی ہم سب نے ملک کر باجوہ ڈاکٹرائین کو شکست دینی ہے آکپتان کاساتھ https://t.co/Aw7AxwhR06	The regime change operation is still going on, these shameless neutrals who brought the thieves to power seem to be continuing to support them. All of us have to defeat Malik Bajwa Docterine along with Captain https://t.co/Aw7AxwhR06	NIL	NIL	Hate
1563821699124154369	یہ تماشہ یہ حکمران ہر سال لگاتے ہیں۔ ہمارے بہتے ہوئے لوگ جانور پانی میں۔ بھوک ،ننک، بیماری دنیا کو دکھاتے ہیں پاکستان کی غربت بے بسی اور اس پر بھی مال کمانااور امبیسیڑز کو بلائیں ہیلی پر گھمائیں دکھائیں ان کو کم کتنے بے بس لاچار بیچارے غریب ہیں ہیلی سے پانی کی ویڈیو بنا کر https://t.co/KTwrKp9TMr	This spectacle is staged by these rulers every year. Our drifting people animals in the water. Hunger, starvation, disease show the world Pakistan's poverty, helplessness and also to make money on it and call the ambassadors to spin on Heli and show them how helpless, helpless, poor, poor they are by making a video of water from Heli https://t. co/KTwrKp9TMr	NIL	NIL	Hate
1558868297533526016	گھریلو بل تقریبا 13 ہزار آنے پر بھتیجی نے بل پھاڑ دیا۔۔😄 https://t.co/i6KvO76UFL	When the household bill came to about 13 thousand, the niece tore the bill..😄 https://t.co/i6KvO76UFL	NIL	NIL	No_Hate
1593197236703596544	سائفر اور امریکی سازش کے معاملے پراپنی بات سے پیچھے ہٹنے کا سوال ہی پیدا نہیں ہوتا،اس معاملے پر چیف جسٹس سےتحقیقات کی درخواست کی ہے۔ عمران خان تم بک جاتے ہو منڈی میں کپتان میرا فار سیل نہیں #وطن_کا_رکھوالا_عمران_خان @TeamiPians https://t.co/ohgBwUMZsm	There is no question of backtracking on the issue of cipher and American conspiracy, the Chief Justice has been requested to investigate this matter. Imran Khan You sell out in the market Captain not my for sale #Watan_Ka_Rakhwala_Imran_Khan @TeamiPians https://t.co/ohgBwUMZsm	1 : ہےر تی راع خا لع پاکت نوک نے پا ٹل وین کا رکھھوال عحران۔ ان	1: Here you are Raa Khala Pakat Nook got it Ahran, the keeper of Tall Van. In	Hate
1563903720882114570	@DunyaNews صحت ٹھیک تھی تو فرعون کی ممی کی گود میں بیٹھ جاتا تھا دلا 🖐 https://t.co/12WiXyJf9f	@DunyaNews If my health was good, my heart used to sit on the lap of Pharaoh's mummy 🖐 https://t.co/12WiXyJf9f	NIL	NIL	Hate
1573938985633779713	ویسے ایک بات کتنی عجیب ہے ناں ! قوم یوتھ یوٹرنل خان کو عاشق رسول بھی ڈکلیئر کرتے ہیں لیکن جب دین پہ حملہ ہو کہتے ہیں کہاں ہیں TLP والے 😂 انج تے نا کرو خان کیہرا کافر اے؟ #فائنل_کال_ہاہاہا #TLP_Promotion https://t.co/u2ql2NJP3F	Well, one thing is so strange! Ashiq Rasool also declares the Nation Youth Uternal Khan but when religion is attacked they say where are the TLP people 😂 Anj Te Na Karo Khan Kihera Kafir O? #final_call_haha #TLP_Promotion https://t.co/u2ql2NJP3F	.کی ای۲سست افظاەہست اسسستمال ہور ہے نی صپال دالاصائن. پسشمے و ہکون سی ت "۴" رت ات یتسم 0 کو پالد بی پڑںی. یجن کے متا اعظسم	KE is a slow -ups Ni Sapal Dalasain. Back and forth "4" Ratat Yatsam 0 To Palad B. Mata Azasam of Yajna	Hate
1561224910076272640	وزیراعظم صاحب کو چاہیے کے پنجاب کی طرح پشتون بلوچ مشترکہ صوبے بلوچستان میں بھی اعلیٰ معیار کی تعلیمی ادارے بناے تاکہ اکرام اللہ جیسا ہر بچہ اپنے ہی سرزمین پر معیاری تعلیم حاصل کرسکے. https://t.co/bEZ0BP60nX	The Prime Minister should build high-quality educational institutions in the Pashtun-Baloch joint province of Balochistan, like Punjab, so that every child like Ikramullah can get quality education in his own land. https://t.co/bEZ0BP60nX	NIL	NIL	No_Hate
1558401393400156161	دیا جلا کے سبھی بام و در میں رکھتے ہیں اور ایک ہم ہیں اسے رہ گزر میں رکھتے ہیں سمندروں کو بھی معلوم ہے ہمارا مزاج کہ ہم تو پہلا قدم ہی بھنور میں رکھتے ہیں @BBhuttoZardari @AseefaBZ @AAliZardari @ShahNafisa @Asad_Ashah @DrUkrani @NazBloch1 @ZobiaKhurshid @Dost_MMazari https://t.co/eqkndCQcwn	Daya Jala is kept in all bam and dar And we are one and keep it alive Even the seas know our mood That we take the first step in the whirlpool @BBhuttoZardari @AseefaBZ @AAliZardari @ShahNafisa @Asad_Ashah @DrUkrani @NazBloch1 @ZobiaKhurshid @Dost_MMazari https://t.co/eqkndCQcwn	NIL	NIL	No_Hate
1572586229367189506	عمران خان اسرائیل تسلیم کرنے میں سب سے بڑی رکاوٹ تھا اس لئے دو انتہاپسند تکفیری جماعتوں کو عمران خان پہ شکاری کتوں کی طرح چھوڑدیا گیا تھا اب امپورٹڈ حکومت اسرائیل کو تسلیم کرنے کیلئے باقاعدہ مذاکرات کر رہی ہے اور ڈیزل، پٹرول خاموش ہیں #اسرائیلی_ایجنٹ_بےنقاب @Real_SHR9263 https://t.co/G1hh75oWnI	Imran Khan was the biggest obstacle to Israel's recognition That is why the two extremist Takfiri parties were left like hunting dogs on Imran Khan Now the imported government is conducting formal negotiations to recognize Israel And diesel, petrol are silent #Israeli_agent_exposed @Real_SHR9263 https://t.co/G1hh75oWnI	ٹر م سے ڈوب مر کی ببریں ظط ہیں میں بل خبریت سے ہوں 0.7	Drowning from trim I am from Bill News 0.7	Hate
1568477472055762944	@hinaparvezbutt تیری طرح چوتیا تو کوئی ہے نہیں نسلی کتیا گشتی https://t.co/ogWGGTwcpv	@hinaparvezbutt There is no one as cute as you.	1 ۱ : ہیاپ رھ کناء ہز یکوکاغا دکولی متقضرءن کوکخذاب من عمیرزند	1 1 : Hayap rah kana his yukkaga Dukoli Mutqazarin Kokkhadab Min Omirzand	Hate
1606606829408043008	خوف سے ان کی کانپیں ٹانگ رہی ہیں !! کیونکہ عوام کی نظر میں اسی لئے #عمران_خان_ضروری_ہے ! https://t.co/ENQ7sn87OH	They are shaking with fear!! Because in the eyes of the public, that's why #Imran_Khan_is_necessary! https://t.co/ENQ7sn87OH	77 ہوشش کے نان لمیں ران خان اقار میں واہں آیا تصرفت ہم بی جل میں نہیں ہو گے ۔	77 Hoshish's Nan Lamin Ran Khan Aqar Will we not be destroyed in the fire?	Hate
1598864723117674496	جو جھوٹ نہ بولے اور یوٹرن نہ لے وہ یوتھیوں کا لیڈر کیسے ہو سکتا ہے یوتھیوں کا گندا لیڈر عمرانڈو #وہ_تم_خود_تھے https://t.co/xfhIwUwXok	How can one who doesn't lie and take utron be the leader of the Uthians? Imrando is the dirty leader of the Uthians. #they_were_yourself https://t.co/xfhIwUwXok	جس نے وز یئم پا وس میں ضدر کا تج ھوٹا دوگ یکسا ما	Who has been stubborn in his life Taj hota dog yaksa ma	Hate
1593859477123788802	آئندہ پاکستان سے جو بھی حکمران سرکاری دورے پر سعودی عرب آئے گا اسے دو کھجوریں، آب زم زم اور ایک تسبیح ملے گی، چاہے بیچو یا کھاؤ😂 سعودی ولی عہد محمد بن سلمان کا دو ٹوک اعلان #گھڑی_چور_شرم_کرو @MaryamNSharif @Atifrauf79 @AdeelAliKhan313 https://t.co/giUwwKCnI6	In the future, any ruler from Pakistan who comes to Saudi Arabia on an official visit will get two dates, Zamzam water and a tasbih, whether they sell it or eat it. Saudi Crown Prince Mohammed bin Salman's blunt announcement #shame_on_the_watch_thief @MaryamNSharif @Atifrauf79 @AdeelAliKhan313 https://t.co/giUwwKCnI6	پر رر یں نچ ےو ود یج توسو لے وے و ںا	But don't worry Dance and dance Take it to you	No_Hate
1596160436436893698	میں ہوں بھارت میں اور تو مدینہ میں ہے۔ میری مجبوریاں تو کہاں میں کہاں۔ 💔 صلی اللہ علیہ وسلم۔ https://t.co/42lJlnAbk7	I am in India and you are in Medina. Where are my compulsions? 💔 Peace be upon him. https://t.co/42lJlnAbk7	NIL	NIL	No_Hate
1578241372314046466	جشن مبارک ہو سب شیعہ سنی بھائیوں کو 🥰🙌🤌🏻 https://t.co/XXrDiGXp7E	Happy celebration to all Shia Sunni brothers 🙌🤌🏻 https://t.co/XXrDiGXp7E	NIL	NIL	No_Hate
1594189748788420608	امیر ترین قطری حکومت اور امیر ترین قطری قوم کا شراب فحاشی کے خلاف جرئت مندانہ فیصلہ https://t.co/cygMmxgi0N	Bold decision of the richest Qatari government and the richest Qatari nation against alcoholism https://t.co/cygMmxgi0N	NIL	NIL	No_Hate
1579511893206904833	WORLD MENTAL HEALTH DAY کیا آپ کو لگتا ہے کہ ذہنی صحت کی اہمیت ہے ؟ کیا ذہنی دباؤ ہماری زندگی میں اہم کردار ادا کرتا ہے یا نہیں ؟ خدارا اسکو مزاق نا سمجھے، ذہنی دباؤ زندگی برباد کر دیتا ہے ۔ #WorldMentalHealthDay #mentalhealthmatters #mentalwellbeing #psychologist https://t.co/grBiu7g5Pn	WORLD MENTAL HEALTH DAY Do you think mental health is important? Does stress play an important role in our life or not? Please don't take it as a joke, mental stress ruins life. #WorldMentalHealthDay #mentalhealthmatters #mentalwellbeing #psychologist https://t.co/grBiu7g5Pn	NIL	NIL	No_Hate
1566416082650468352	عبدالحمید زہری ایک کاروباری انسان تھا اس کو کراچی سے لاپتہ کردیاگیا اس کا جُرم یہ تھا ایک وہ ایک بلوچ تھا۔ #ReleaseAbdulHameedZehri https://t.co/22M2gyCB6l	Abdul Hameed Zahri was a businessman, he was disappeared from Karachi, his crime was that he was a Baloch. #ReleaseAbdulHameedZehri https://t.co/22M2gyCB6l	NIL	NIL	Hate
1565570898878468097	چہرا میرے نبیؐ کا خدا کی کتاب ہے جس نے بھی دیکھا حافظ قرآن ہو گیا صلی الله علیہ وآلہ وسلم💕💞 https://t.co/B98bNkvUln	The face of my Prophet is the book of God Whoever saw it became a memorizer of the Qur'an Peace be upon him 💕💞 https://t.co/B98bNkvUln	NIL	NIL	No_Hate
1567453216069062658	پوری قوم اپنے مرد مجاہد لیڈر عمران خان کے ساتھ ظلم کے خلاف آخری کال کی منتظر ہے۔اب وقت آگیا ہے انقلاب کا اور آخری کال کا۔اس سے پہلے کہ یہ یہودی ٹولہ کوئی اور سازش کرے #فوج_بھی_میری_ملک_بھی_میرا https://t.co/V5WcS2rPMg	The whole nation is waiting for the last call against tyranny with its male Mujahideen leader Imran Khan. Now is the time for revolution and last call. Before this jewish gang does another plot #فوج_بهي_ميري_ملك_بهي_ميرا https://t.co /V5WcS2rPMg	35	35	Hate
1581288594991247360	@asmabotni @OfficialDGISPR 😀😃😄نہیں وہ نیوٹرل جو ہوگئے ہیں اور وہ ریچھ کی طرح چھ مہینے کے لئے سو گئے ہیں https://t.co/ezFA0LdMPr	@asmabotni @OfficialDGISPR 😀😃😄 No they are neutral and have slept like a bear for six months https://t.co/ezFA0LdMPr	۲ ۰ کا لینا دینا صرف ‎۳٣۳‏ سے ہے۔ پر	2000 only It is from 333. But	Hate
1572858353709195264	جلے ہوے کو اور جلانا ریٹویٹس کرتے جائیں مخالفین کو برنال پہنچا دی گئی ہے ایک نمونہ پیش خدمت ہے #کپتان_قدم_بڑھاو_قوم_ساتھ_ہے https://t.co/kzncbWmvCo	Burning the burnt By retweeting, opponents have been sent to Bernal A sample is provided #Captain_steps_up_with_the_nation_is https://t.co/kzncbWmvCo	NIL	NIL	Hate
1566064816376135680	@TabiCh_DxB شلوار الٹی ہوسکتی ہے پر کردار الٹا نہیں ۔۔ لیکن یہاں تو اندر کا کردار( برا ) پھاڑ کر باھر آرہا ہے ۔۔۔سختی بتا رہی ہے بڑھیا اسوقت کتنی گرم ہوگی https://t.co/ohYXQ3d1qk	@TabiCh_DxB Shalwar may be upside down but character is not upside down. But here the inner character (bad) is coming out by tearing. Hardness is telling how hot it will be at that time https://t.co/ohYXQ3d1qk	.د۵ ججو سڈلاتنز نزو سک ای تی جم میں نجیر	D5 Juju Sadlatans Najir at the Nzo Ski ET Gym	Hate
1561739524769812481	اقتدار کے ایوانوں میں بیٹھے گماشتو! سیلاب میرے وطن کو بہائے لے جا رہا ہے. کوئی تو اس وطن کی پکار سنے. مجرا دیکھنے والے دلالو! تم اس سب کے ذمہ دار ہو. اور تم سے اس کے بارے میں پوچھا جائے گا. @CMShehbaz @ImranKhanPTI @BBhuttoZardari https://t.co/Zlt53fqIFQ	Gambashtu sitting in the halls of power! The flood is taking away my homeland. Someone should listen to the call of this country. Channel-seeing pimps! You are responsible for all this. And you will be asked about it. @CMShehbaz @ImranKhanPTI @BBhuttoZardari https://t.co/Zlt53fqIFQ	NIL	NIL	Hate
1568527904782585857	ڈاکیے کی طرح کپڑوں میں ملبوس شحض پاکستان کے سب سے بہترین وزراء میں سے ایک ہے اور لعنت ہے اُن شلوار قمیضوں والوں پہ جو آج بھی سیاست سیاست کھیلنے میں مصروف ہیں🙌🏻💚😇 https://t.co/DQlWE3DWB4	Dressed like a postman, Shahaz is one of the best ministers of Pakistan and damn those in shalwar kameez who are still busy playing politics 🙌🏻💚😇 https://t.co/DQlWE3DWB4	NIL	NIL	Hate
1563502755896913922	دفاعی بجٹ سے صرف بھارت کے حملوں سے بچانے کےلیے ہے یہ سیلاب جیسے چھوٹے موٹے مسائل کےلئے نہیں #FloodinPakistan https://t.co/yBFhVb8kZK	The defense budget is only to protect against Indian attacks, it is not for minor problems like floods #FloodinPakistan https://t.co/yBFhVb8kZK	NIL	NIL	Hate
1564231161118867456	ہاں وائی خادم حسین رضوی کی ناجائز اولادوں ۔۔۔ کوئی دھرنا شرنا کوئی توڑپھوڑ کوئی ریلی کوئی جلوس اس بیان کے متعلق https://t.co/8v75bIlOZj	Yes, the illegitimate children of Khadim Hussain Rizvi. No protest, no vandalism, no rally, no procession related to this statement https://t.co/8v75bIlOZj	مک لکھڑی می را ٍ01 پلاو لگنٹوزژردارگی	Mak Lakhri Me Ra ٍ01 Pulmonary ligaments	Hate
1587559497630892033	@Psigho @SdqJaan @ImranRiazKhan منشیات کے بازار، ہوس کے اڈے، شراب خانے، جوا، چوری، ڈاکہ زنی، قتل وغارتگری، زنا کاری، رشوت خوری، سود، حرام خوری، دھوکہ دہی، بددیانتی، جھوٹ، خوشامد، دوغلے پن، حرص، تمہ، لالچ، ملاوٹ، ناپ تول میں کمی، دھوکہ دہی، فریب، مفاد پرستی، تشدد، تعصب، عصبیت اور انسان دشمنی کے ایسے مظاہرے ہیں https://t.co/iuvZAcY5fU	@Psigho @SdqJaan @ImranRiazKhan Drug markets, dens of lust, bars, gambling, theft, robbery, murder, adultery, bribery, usury, fornication, fraud, dishonesty, lying, flattery, duplicity, Greed, ambition, greed, adultery, lack of measure, fraud, deception, selfishness, violence, bigotry, nihilism and anti-humanism are such manifestations https://t.co/iuvZAcY5fU	NIL	NIL	No_Hate
1579514295091503104	منیبہ شاہد پہلے بھی جرنل سیکٹری رہی ہیں ان کا حق بنتا تھا لیکن اگر کوئی نیا چہرہ آ رہا تو ان کا بھی حق ہے pti کسی ایک فرد کی پارٹی نہیں ہے لیکن اگر نیے آنے والے پیرا شوٹر ہیں تو منیبہ کا حق بنتا ہے خیر کچھ بھی ہو پارٹی معملات سوشل میڈیا کے ذریے حل نہیں ہوتے اگر آپ کو اعتراض https://t.co/ntbjG1aJCu	Muniba Shahid has been the Journal Secretary before, she got her right, but if a new face comes, she also has a right. However, party issues are not resolved through social media if you mind https://t.co/ntbjG1aJCu	NIL	NIL	No_Hate
1573185699461099521	" سائفر " شکریہ تیرا ۔۔۔۔۔چوروں اور ڈاکوؤں کا سرغنہ غدار وطن دہشت گرد نامرد وردی میں ۔۔ https://t.co/4Dg1MyS1tJ	"cipher" Thank you. The leader of thieves and bandits, a traitor to the homeland, a terrorist in a helpless uniform. https://t.co/4Dg1MyS1tJ	NIL	NIL	Hate
1606896511681716226	آج پچیس دسمبر ہے قایداعظم محمد علی جناح کا یوم ولادت، اللہ آپکی قبر پہ کروڑوں رحمتیں نازل فرمائیں امین، ہم دل کی گہرائیوں سے سلام پیش کرتے ہیں، آزادی جیسی نعمت ہم جیسوں کو دلائی ۔ https://t.co/5pAZ85mlaV	Today is December 25th, the birthday of Quaid-e-Azam Muhammad Ali Jinnah, May Allah shower millions of blessings on his grave, Amen. We salute you from the bottom of our hearts, the blessing of freedom has been given to us. https://t.co/5pAZ85mlaV	NIL	NIL	No_Hate
1578707222481117185	@MemonaMushtaq مردوں کو خوش کرنے کے لئیے تھن دکھانے پڑتے ہیں جیسے نانی نے حاجی قابو کیا ہوا ہے https://t.co/90LOFZpHUJ	@MemonaMushtaq have to show nipples to please men like Nani has Haji Kaboo https://t.co/90LOFZpHUJ	NIL	NIL	Hate
1578753585076375554	@RashidNasrulah دال میں کچھ کالا ہیی ۔پٹواریوں کس چیز کی سرجری ہیی آخر https://t.co/H1XLtlZjL0	@RashidNasrulah There's something black in the dal. What kind of surgery are the Patwaris doing? https://t.co/H1XLtlZjL0	مریم صفدر 4 گھنٹے قطر میں قیام کرنے کے بعد لندن روانہ.. عینی شاہدین کے مطابق جب ہوٹل سے نکلی تو منہ پر ماسک لگا رکھا تھا اور چلنے میں تکلیف ہورہی تھی..	Maryam Safdar left for London after staying in Qatar for 4 hours. According to eyewitnesses, when she left the hotel, on her face The mask was on and it was painful to walk.	Hate
1562838853249302534	عالمی صیہونی لابی لنگر لگوٹ کس کر عمران خان کے دفاع کیلئے میدان میں اترے--سب سے پہلے انہوں نے عمرانڈو ججوں کو محرک ہونے کا حکم دۂا-لہذا جب تک #بندیال_گینگ کو بر طرف اور گرفتار نہیں کیا جاتا ہے افراتفری جاری رے گی- https://t.co/c3QCJpwqyo	The international Zionist lobby anchors pulled the trigger and came to the field to defend Imran Khan--first of all they ordered Imrando judges to be motivated-so until the #Bandial_Gang is removed and arrested, the chaos will continue- https://t.co/c3QCJpwqyo	NIL	NIL	Hate
1598532342867296257	شامی فورسز کا فرسٹ لیفٹیننٹ "خضر فواد عباس" مشرقی حمص کے دیہی علاقوں میں صحرائے پالمیرا میں ھلاک ہوگیا، الحمدللہ🔥 #حمص https://t.co/812JNUJQaM	The first lieutenant of the Syrian forces "Khidr Fawad Abbas" was killed in the Palmyra desert in the rural areas of eastern Homs, Alhamdulillah🔥 #Homs https://t.co/812JNUJQaM	NIL	NIL	No_Hate
1564577675515158528	مراد ٹنل سپیڈ کی نظر میں اگر سوات اور خیبرپختونخوا کے سیلاب زدگان کی حیثیت ہوتی تو شاید یہ آج اپنے قوم کے درمیان ہوتے مگر اس ٹیز مار نے سب سے پہلے راہ فرار اختیار کرکے طالبان کے ڈر سے سوات چھوڑا مگر تعجب کی بات یہ ہے کہ ان کے خاندان والے خود طالبان تھے تو کس لئے سوات سے بھاگ گیا؟ https://t.co/aP5r5pmhKq	In the eyes of Murad Tunnel Speed, if the flood victims of Swat and Khyber Pakhtunkhwa had the status, they would probably be among their own people today, but this Tez Mar was the first to escape and left Swat due to the fear of the Taliban, but the surprising thing is that His family members were Taliban themselves, so why did he run away from Swat? https://t.co/aP5r5pmhKq	NIL	NIL	Hate
1587458568411922432	گنجے شیطان کو ایک بار پھر تھپڑ پڑا ہے🤭 https://t.co/wC0rBcA9Tx	The bald devil has been slapped again 🤭 https://t.co/wC0rBcA9Tx	کہ برثی کا کوکی علاع ت٠یں‏	That is the birthday cake	Hate
1568933802440888321	#دھرتی_پر_اوَتار سنت رامپال جی مہاراج کا مقصد ہے کہ دھرتی سوَرگ جیسی ہو، اور اس گھور کل یُگ میں دوبارہ ست یُگ جیسا ماحول ہو، جس میں لوگوں میں آپسی بھائی چارہ ہ سنت رامپال جی مہاراج کہتے ہیں- "جیوَ ہماری جاتی ہے، مانوَ درھم ہمارا۔ ہندو، مسلم، سکھ، عیسائی درھم نہیں کوئی نیارا۔ https://t.co/SmiOsScX3K	#Incarnate_on_Earth Saint Rampal Ji Maharaj's goal is that the earth should be like heaven, and in this Ghor Kal Yug again, there should be an atmosphere like Satyug, in which there is mutual brotherhood among people. Sant Rampalji Maharaj says- "Life is ours, faith is ours. Hindus, Muslims, Sikhs, Christians, no dirham, no nyara. https://t.co/SmiOsScX3K	ورك“ .جج ین کا مقصیند سس کے سماغ میں امن ہدو دنیا تو تت اور نشے سے آزاد بنے. سنت رامپال جی مہاراغ جی کے گیان کے بارے میں مزید جانئے کے لیے سسیں والس ایپ پر میسیج کریں 317702845 92+ فِ‌ ا 1ء0۴6 شاہك ۸۶ھ ادء1۶ہززا ط۵٢‏ لت 09 پسسشس نت 7 آز۲امات ا ۴	Work". Judge Yen The purpose of K Peace be in the world Be free from addiction and addiction. Saint Rampalji Maharagji Learn more about K Gyan For Sisin Wallis app message +92 317702845 F. A. 1.046 Shahik 86 AH AD 16 Hazza T 52 Lt 09 Pssissis Nt 7 Az2amat A 4	No_Hate
1581253924857982977	لاڈلے نے آخر مان لیا کہ وہ سلیکٹڈ تھا 😁 یوتھیو کوئی زندگی نٸیں تواڈی😂 https://t.co/zToGPLU1dc	Ladley eventually accepted that he was selected 😁 Yutheo Koi Jeevan Nai Wadi 😂 https://t.co/zToGPLU1dc	NIL	NIL	Hate
1588201949786144768	@NawazSharifMNS بھڑوا چپ کر لنتی باجوہ کے کتے #عمران_خان_ہماری_ریڈ_لائن https://t.co/Vinq1jJJXF	@NawazSharifMNS shut up Lanti Bajwa's dogs #Imran_Khan_Our_Red_Line https://t.co/Vinq1jJJXF	NIL	NIL	Hate
1563860520121384961	آج میں نے پورے 5 برگر کھائے ہیں 😂 یہ والے👇👩‍🏫 https://t.co/tthV4qNpcA	Today I completed 5 Have eaten burgers This one 👇👩‍🏫 https://t.co/tthV4qNpcA	NIL	NIL	No_Hate
1567931306750742539	@Pakhtunkhwa360 محکمہ لائیو سٹاک کی ٹیمیں سیلاب زدہ علاقوں میں گھر گھر جا کر مال مویشیوں کے نقصانات کا ڈیٹا اکھٹاکر کے متاثرہ جانوروں کے لئے ادویات فراہم کر رہی ہیں - #KPFloodReliefOperations https://t.co/t1oP5NIPs3 h https://t.co/fyXqXtQEUM	@Pakhtunkhwa360 Livestock Department teams are going door-to-door in flood-affected areas to collect data on livestock losses and provide medicines to affected animals - #KPFloodReliefOperations https://t.co/t1oP5NIPs3 h https://t.co/fyXqXtQEUM	NIL	NIL	No_Hate
1581324014554710017	@ImranRiazKhan ❌#امپورٹڈ_حکومت_نامنظور❌ جو لیڈر ہوتا ہے وہ مشکل وقت میں اپنی عوام کے ساتھ کھڑا ہوتا ہے اور جو بھگوڑا ہوتا ہے وہ مشکل وقت میں بھاگ جاتا ہے https://t.co/4cAGbaooJl	@ImranRiazKhan ❌ #imported_governance_namanzoor❌ A leader stands by his people in difficult times and a fugitive runs away in difficult times https://t.co/4cAGbaooJl	رتصویر 4 ھگروڑ عوام لییےتغام ہے پھر میں سے تین بھا یں صرف ایک اوھ رہ ےکیوگہ ا سکی عکومت ہے اس کا مطلب ہ ےکہ جب عومت ہوتی ہے توبہ پاستان میں ہوتے ہیں جب ا نکی علومت 0ت سڈ	Fig. 4 Hagarod is a tribute to the people, then three of them It means that there is only one person left When there is Ummat, repentance is in the Pastan, when their knowledge is 0	Hate
1578692478584381441	جب پاکستان کے آئین میں لکھا ہے کہ کادیانی مرتد مسجد سے مشابہ عبادت گاہ نہیں بنا سکتے تو پھر یہ شرارت کرکے پاکستان میں امن و امان کی صورتحال کیوں خراب کرنا چاہتے ہیں ؟ مسجد ضرار اور یمامہ نا تم بھولے ہو نا ہم بھولے ہیں #تاجدار_ختم_نبوت_زندہ_باد #TLP_Promotion https://t.co/UCNmxCEP2U	When it is written in the constitution of Pakistan that Qadian apostates cannot build a place of worship similar to a mosque, then why do they want to spoil the peace and order situation in Pakistan by doing this mischief? Masjid Zarrar and Yamama, neither you have forgotten nor we have forgotten #Tajdar_Khatm_Nabuat_Zinda_Bad #TLP_Promotion https://t.co/UCNmxCEP2U	یش نکورٹ کے نیل لاف قادی نو ںکی ایل بن رٹ سے نا رر	Yash Nicort K Nil Laf Qadi No Ki L Bin Dismissed from the writ	No_Hate
1566062491137884163	یہ کوہ پیما نہیں بلکہ کالام کے سیلاب زدہ لوگ ہیں کالام روڈ دریا برد ہونے کے بعد کچھ جگہوں پر اس طرح پہاڑ چڑھنا اور اترنا پڑتا ہے ۔۔یہ لوگ بحرین سے اشیاء خوردونوش کندھوں پہ رکھ کے لے جانے پہ مجبور ہوگئے ہیں ۔ #AlkhidmatFloodAppeal https://t.co/v2K5vLRAJT	These are not mountain climbers, but flood-affected people of Kalam. Kalam Road has to be climbed and descended in some places after the river has washed away. These people have been forced to carry food items from Bahrain on their shoulders. #AlkhidmatFloodAppeal https://t.co/v2K5vLRAJT	NIL	NIL	No_Hate
1567035205357019138	کتنی بار ایسا ہوا کہ ہمارے پاکستانی کھلاڑیوں نے آسان کیچ چھوڑے۔کیا وہ بھی کسی کے ایجنٹ تھے؟خواہ مخواہ ارشدیپ سنگھ کو متنازع بنانے کی کوشش مت کریں اس کی انگلی پر گیند لگی اس کے علاؤہ اور کچھ نہیں۔ مذاق میں ایسا جھوٹا الزام مت لگائیں کہ کل اس کی زندگی کو خطرہ درپیش ہو۔ https://t.co/PJ1DtPY8Y9	How many times it happened that our Pakistani players missed easy catches. Were they also someone's agent? Don't try to make Arsdeep Singh controversial, he was hit by the ball on his finger and nothing else. Do not jokingly make such a false accusation that his life will be in danger tomorrow. https://t.co/PJ1DtPY8Y9	NIL	NIL	No_Hate
1593851194707005441	اسٹبلشمنٹ کا کتا جیو ٹی وی پر کپتان کے خلاف بھونک رہا ہے https://t.co/cTy176zghK	Establishment dog barking against skipper on Geo TV https://t.co/cTy176zghK	چو و ویو جتےت ڑی دم نو٠‏ ان بن افرادی قرد21 ۵	Chow and Vive Jatet 21 5	Hate
1570348948455591937	کیا یہ سچ ھے کہ تاریک انصاف کے سلیکٹیڈ ممبران اسمبلی سوات طالبان کے ظھور کے بعد فرار ھو کر پنجاب اور اسلام آباد میں پناہ گزین ھو چکے ھیں۔ https://t.co/H6up6Ueb8Q	Is it true that Dark Justice's Selected? After the appearance of the Swat Taliban, the members of the assembly fled to Punjab and Islamabad They have become refugees. https://t.co/H6up6Ueb8Q	NIL	NIL	Hate
1577520848202006528	*بھارت : جھارکھنڈ میں ہندوتوا ہجوم نے مسلمان نوجوان کو پیٹ پیٹ کر قتل کر دیا* #IndianMuslimsUnderAttack #BJP_RSS_terorrism https://t.co/nIVs9nbVKB	India: Muslim youth beaten to death by Hindutva mob in Jharkhand #IndianMuslimsUnderAttack #BJP_RSS_terrorism https://t.co/nIVs9nbVKB	11111111113 751	11111111113 751	No_Hate
1578735371403214850	وہ بلالؓ حبشی ہوں یا اویس قرنی ہوں ان ﷺ پہ مرنے والوں کی ہر ادا نرالی ہے #صلوات_بر_محمدؐ 'Prophet Muhammad' 'Perfect Role Model' https://t.co/PCVKPNiqvS	He is Bilal Abyssinian or Owais Qarni Every death of those who died on him ﷺ is unique #Salawat_bar_Muhammad 'Prophet Muhammad' 'Perfect Role Model' https://t.co/PCVKPNiqvS	NIL	NIL	No_Hate
1613146128496660480	مایوس تو وہ ہوں جن ہونے ختم نبوت پر ڈاکا ڈالا مایوس تو وہ ہوں جن ہونے گستاخ کو رہا کیا مایوس تو وہ ہوں جن ہونے گستاخوں سے یارانا ملہایا ہم تو چمکتے ہوے محبوب کے غلام ہیں باتیں بھی چمکتی ہوئی کریں گے #امدادکابہانہ_فرانس_سےیارانہ https://t.co/565TP6r07x	Desperate are those who besieged the end of prophethood Disappointed are those who freed the insolent Disappointing are those who have celebrated Yarana with the insolent We are the slaves of the shining beloved, we will also speak with shining words #امدادكابهانا_فرنس_سيارانه https://t.co/565TP6r07x	NIL	NIL	No_Hate
1565274950369509376	تحریک لبیک چئیرمین سعد رضوی کا بہنوئی فرانس میں سرکاری عہدے پر تعینات۔ لبیک والے زیادہ لعنتی نکلے فرانس کا بائیکاٹ کرو مگر پلو ان ہی کے ٹکڑوں پر۔ واہ ری منافقت زندہ باد 🖐🖐 https://t.co/nyUhK27erp	The brother-in-law of Tehreek-i-Labaik Chairman Saad Rizvi appointed to an official position in France. Boycott France if they are more cursed, but plow on their own pieces. Long live hypocrisy 🖐🖐 https://t.co/nyUhK27erp	مرحوم خادم رضوی کے داماد اور تحریک لبیک کے چیئرمین سعد رضوی کے بہنوئی کو فرانس میں تعینات کردیا گیا ہے۔ ن لیگ کیا خوب دوستانہ انتقام لے گئی تحریک لبیک سے۔ جو فرائس کے بائیکاٹ کے خواہاں تھے انکی روزی روٹی فرانس میں لگا دی۔ مرحوم خادم حسین رضوی کا داماد اور سعد رضوی کا بہنوئی فرائنس میں تعینات ہوچکا ہے تحریک لبیک والے زرا حاضری لگوائیں	Saad, son-in-law of late Khadim Rizvi and Chairman of Tehreek Labeek Rizvi's brother-in-law has been posted in France. What did the PML-N do? A friendly revenge was taken from Tehreek Labeek. of Joe Fries Those who wanted to boycott put their livelihood in France. Son-in-law of late Khadim Hussain Rizvi and Saad Rizvi The brother-in-law has been appointed in France Tehreek Labik Wale Zara Attenda…	Hate
1565678312030375936	اس ناسور کے لیے ایک جملہ پلیز کمنٹ ضرور کریں https://t.co/JrYpIj1abj	Please comment one sentence for this virus https://t.co/JrYpIj1abj	NIL	NIL	Hate
1593864303018496003	@ShahidKhaqanAb پاکستان کا وزیراعظم صرف عمران خان مسلم امہ کا لیڈر عمران خان https://t.co/7FLwHBluvu	@ShahidKhaqanAb Prime Minister of Pakistan only Imran Khan Leader of Muslim Ummah Imran Khan https://t.co/7FLwHBluvu	NIL	NIL	No_Hate
1567040108091539456	کیا یہ لوگ مقدس گاۓ کی طرح ہیں جو اپنے خلاف ایک جملہ بھی برداشت نہیں کرتے ہیں۔عوام کے غصّے کی کوئی قدر نہیں ہے اور آپ لوگوں کا غصہ کسی عرش سے اترا ہے۔ اپنے حلف کی ہی پاسداری کر لیا کرو" جب کسی کو انگلی دینی ہو تو خود بھی چپے سہنے کی برداشت رکھنی چاہے" پاک فوج زندہ باد https://t.co/b62wJFogRV	Are these people like holy cows who do not tolerate even a single sentence against them. People's anger has no value and your people's anger has come down from a throne. "Keep your oath." When you want to give someone the finger, you should also have the patience to suffer silently." Long live Pak Army https://t.co/b62wJFogRV	‎٤‏ لوگگوں کو صرف اں بات کا غحصہ ج ےکم پاکتالی عوام تم لوگوں سے زیادہ عحرانع ان سے کیوں حبت کمرکی سان ا اتا ی عوام کی عحران خان سے بے پتاہ حبت م لوگوں سے ہرواشت 1 ہوئی ۔	Only 4 people Part of the story is J.K. Paktali People more than you people Why do you love them? Work and people Unknown to Ahran Khan I love people Harvasht 1 happened.	Hate
1568328160294408194	پہلی بار بندوق کے بغیر کسی شخص کو دہشتگرد قرار دیا گیا ہے پہلی بار اپنے وطن کا ساتھ دینے پر ایک شخص کو غدار قرار دیا گیا ہے تاریخ میں ایسا کبھی نہیں ہوا کہ اپنے ہی ملک کو جھنڈے کو سربلند کرنے والا غدار قرار دیا گیا ہے اس بات پر کسی کو شرمندگی ہے؟ https://t.co/rfyWntiE1A	For the first time, a person without a gun has been declared a terrorist For the first time, a person has been declared a traitor for supporting his country It has never happened in history that one's own country has been declared a traitor for hoisting the flag Is anyone embarrassed about this? https://t.co/rfyWntiE1A	NIL	NIL	No_Hate
1566424048212606977	@AftabIqbalFan کیوں نا ان کنجر کنجری کو زہر دیا جائے https://t.co/1cszObs2nz	@AftabIqbalFan Why not poison these conjurers https://t.co/1cszObs2nz	NIL	NIL	Hate
1577703431279714304	اسامہ مہینوں ایبٹ آباد میں تھا آپ لا علم رہے امریکہ کی اسامہ پر تین گھنٹے بمباری آپ لا علم رہے۔ ریمنڈ ڈیوس سالوں سے جاسوسی کرتا رہا جاتے ہوئے دو بندے مار گیا آپ لا علم رہے اے پی ایس میں مہینوں ریکی کرکے دھشت گرد 150 بچے مار گئے آپ لا علم رہے بس آپ کو یہ پتہ ہے کہ سازش نہیں ہوئی https://t.co/U6jH1mbyI0	Osama was in Abbottabad for months, you were unaware of the three-hour bombardment of America on Osama, you were unaware. Raymond Davis has been spying for years and two men were killed without knowing it 150 children were killed by terrorists in APS for months, you are unaware Just so you know there is no conspiracy https://t.co/U6jH1mbyI0	۲۷١ 0٥01۲۵۴۷ ۷۷۸۶ ا13٤٤٦٥١‎ 3811 ۲٢۳٣ 0۱۷۲ ۲٣۱8٥٢٢٤٣۲ 17٣۲	271 05012547 7786 A1344651 3811 2233 0172 2318522432 1732	Hate
1593106658749726720	برطانیہ کے وزیر اعظم رشی سونک نے بھارتی وزیر اعظم نریندر مودی سے ملاقات کے بعد بھارتیوں کیلئے مخصوص ویزا سکیم متعارف کروادی۔ Readmore:https://t.co/VX3UqGQUTI #england #indian #NarendraModi #VISA https://t.co/1h7jNGy7mI	British Prime Minister Rishi Sonak introduced a special visa scheme for Indians after meeting Indian Prime Minister Narendra Modi. Read more: https://t.co/VX3UqGQUTI #england #indian #NarendraModi #VISA https://t.co/1h7jNGy7mI	NIL	NIL	No_Hate
1596174015030345730	پاکستان پیپلز پاڑٹی کا 55واں یومِ تاسیس قائد عوام شہید ذولفقارعلی بھٹو اور شہید جمہوریت محترمہ بینظیر بھٹو کی مشن کو آگے بڑھاتے ہوئے چیرمین بلاول بھٹو زرداری صاحب کے حکم پر اس سال یومِ تاسیس شایان شان طریقہ سے منانے کیلئے تمام جیالے عہدیداران پرُ عزم https://t.co/ecxpZniNrs	55th Foundation Day of Pakistan People's Party On the order of Chairman Bilawal Bhutto Zardari, all officials are determined to celebrate the foundation day this year in a dignified manner while advancing the mission of leader of the people Shaheed Zulfiqar Ali Bhutto and Shaheed Democracy Ms. Benazir Bhutto https://t.co/ecxpZniNrs	ات تر بی سے ُ اکستانپیپنزپارٹی دو مگ ت	From there Pakistan Peoples Party Two Magat	No_Hate
1598742590387781637	آصف زرداری سیاست دان نہیں ہے۔ یہ انگلش میں بروکر ، پنجابی میں دلہ اور اردو میں بھڑوا ہے https://t.co/794H34liTL	Asif Zardari is not a politician. It is Broker in English, Dala in Punjabi and Bhadwa in Urdu https://t.co/794H34liTL	NIL	NIL	Hate
1560242098170912769	ہم امریکی صیہونی منصوبوں کا مقابلہ کرنے کے لیے پہلے سے زیادہ تیار ہیں، ہاشم صفی الدین https://t.co/okGJdPTSxl #شہباز_گل_کو_رہا_کرو #faisalabadincident https://t.co/e0xty4qEzW	We are more ready than ever to counter American Zionist plans, Hashim Safiuddin https://t.co/okGJdPTSxl #Keep_Shehbaz_Gul_Ko #faisalabadincident https://t.co/e0xty4qEzW	شم اصریقی صسقوفّی منصویوں کامقابله کرنے کے لیے پھلے سے زیادد تیارشیں, ان نیشن پچ	Sham Esreeqi vs Sasqoufi Mansavis Be prepared in advance to do, In Nation Pitch	No_Hate
1566401363898138626	صدرمملکت ڈاکٹر عارف علوی کی ایشین باڈی بلڈنگ چیمپئن شپ میں گولڈ میڈل جیتنے پر فدا حسین بلوچ کو مبارکباد #APPUrdu https://t.co/DeRp8XI0pC https://t.co/2K4uZzLuLS	Congratulations to Fida Hussain Baloch for winning the gold medal in President Dr. Arif Alvi's Asian Bodybuilding Championship. #APPUrdu https://t.co/DeRp8XI0pC https://t.co/2K4uZzLuLS	NIL	NIL	No_Hate
1566725067102457856	میں نے اس ملک کے لیےدعا کی ہے میرے اللھ اس سے اس امپورٹڈ حکومت کا خاتمہ فرما https://t.co/RIHAtncdog	I have prayed for this country, may God end this imported government https://t.co/RIHAtncdog	NIL	NIL	Hate
1614387437224050688	کسی کا لیڈر بدشکلا، کسی کا موٹا اور کسی کا منہوس لیکن میرا لیڈر حسین، اسمارٹ اور انتہائی خوبصورت ہے۔ ماشاءاللہ #عمران_خان_کاجلوہ https://t.co/kyStU96eKS	Some leader is ugly, some is fat and some is ugly but my leader is handsome, smart and very handsome. Mashallah #Imran_Khan_Kajloh https://t.co/kyStU96eKS	NIL	NIL	Hate
1579496400551018498	کنڈیارو:ایک پچہ اپنے باپ کی مدد کرتے گیلی مٹی اٹھارہا تھا۔وہاں درندہ صفت وڈیرا گزرتے ہوۓچھوٹے سے دس سالہ معصوم پچے سے وڈیرے کے پاؤں پرگیلی مٹی گرگئی جس وجہ سے اس حیوان نے معصوم پچے کو سر میں گولی مار کر ھلاک کر دیا اور اُس کےباپ کی ٹانگ میں گولی مار کر اپاہج بنا دیا!! As received https://t.co/3ybNezEaJo	Kandiyaru: A boy was helping his father to pick up the wet soil. While passing by, the wild beast Vadera fell on the feet of the ten-year-old innocent boy, because of which the beast shot the innocent boy in the head and killed him. He shot his father in the leg and made him crippled!! As received https://t.co/3ybNezEaJo	NIL	NIL	No_Hate
1593197992655220736	وہ بہت کمال شخص تھا جیسے میں جانتی نہ تھی پھر یوں ہوا دل سے اتر گیا اسے جاننے کے بعد #محبت_مافیا https://t.co/H4UgMysLEX	He was a wonderful person like I didn't know Then after knowing this, the wind came down from the heart #Love_Mafia https://t.co/H4UgMysLEX	NIL	NIL	No_Hate
1593085995423256576	نریندر مودی اور رشی سنک نے بالی میں #G20 سمٹ میں گریجویٹوں کے لیے ینگ پروفیشنلز اسکیم کے آغاز کا اعلان کیا @PMOIndia @narendramodi @RishiSunak https://t.co/eGZePmZqXQ @MilapNN @UKinIndia @AlexWEllis #India #UK https://t.co/PwIk1eyene	Narendra Modi & Rishi Sanak Announce Launch of Young Professionals Scheme for Graduates at #G20 Summit in Bali @PMOIndia @narendramodi @RishiSunak https://t.co/eGZePmZqXQ @MilapNN @UKinIndia @AlexWEllis #India #UK https: //t.co/PwIk1eyene	NIL	NIL	No_Hate
1561263890146926592	امریکی فوج کے ظالمانہ سلوک کے شکار افغان شہری https://t.co/HDXJvoLeJ5 https://t.co/x5OgCSg0nQ	Afghan Citizens Victims of U.S. Military Atrocities https://t.co/HDXJvoLeJ5 https://t.co/x5OgCSg0nQ	NIL	NIL	No_Hate
1592216628246491137	دل لگانا دل جلانا زندگی ہے یہی اپنا فسانہ زندگی دریا دریا پی کے دنیا کے ستم آنسو آنسو مسکرانا زندگی آج مجھ کو مجھ سے ملنے دے ذرا تو کبھی فرصت سےآنا زندگی میں نےبھی ہاری ہےبازی پیارکی تو مجھےبھی آزمانا زندگی وہ جو دل کاصاف ہو اسکو سبھی لوگ کہتے ہیں دیوانہ زندگی #محفل_لب_کشاٸی https://t.co/e76wNAkpph	Heart burning heart burning life This is your fairy tale life Darya Darya P. K. Satam of the world Tears tears smile life Please let me meet you today So sometimes life comes from leisure I have also lost Baazi Pyaarki So try me too life All those who are pure in heart People say crazy life #محفل_لب_كشائي https://t.co/e76wNAkpph	6465 ززام۷۵+و١۴۳۰۸‏ ۸٥750طادل‏ ۶یک	6465 Zazam 75+ and 14308 85750 Tadal 6 one	No_Hate
1617809442736578562	قرطبہ سٹی ،اپنے خوابوں کو حقیقت میں بدلیں. ہمارے ہر سیکٹر میں مخصوص مسجد، اسکول، پارک ، طبی مرکز اور بازار/کمرشل سائٹ کی سہولتیں مہیا کی گئی ہیں۔ ہر سیکٹر میں کم از کم 40 فٹ سے 300 فٹ تک چوڑی شاہراہوں کا جال بچھایا گیا ہے، جو قرطبہ سٹی کے مختلف سیکٹرز کو آپس میں ملاتی ہیں۔ https://t.co/zo3Cc8rdAJ	Córdoba City, turn your dreams into reality. Each of our sectors has dedicated mosque, school, park, medical center and market/commercial site facilities. Each sector has a network of highways ranging from at least 40 feet to 300 feet wide, connecting the different sectors of Cordoba City. https://t.co/zo3Cc8rdAJ	0179224 3ہ لق 0686 31ہ	0179224 3rd Laq 0686 31H	No_Hate
1580121198637502466	دل خوش کردیا سوات والو۔۔😘 واقعی زندہ قوم ہو اگر ہر پاکستانی آپکی طرح روڈوں پے نکلے تو تمام مسائل کا خاتمہ ممکن ہے۔۔۔❤♠ https://t.co/Ut8t7MI3RF	Made my heart happy, Swat people Be a truly living nation If every Pakistani goes out on the roads like you, all problems can be solved. ❤♠ https://t.co/Ut8t7MI3RF	NIL	NIL	No_Hate
1581379895695118336	جوبائیڈن کے بیان پہ اس منحوس چڑیل کا کوئی ٹویٹ؟ https://t.co/3kBT1lfIKK	Any tweet of this evil witch on Joe Biden's statement? https://t.co/3kBT1lfIKK	NIL	NIL	Hate
1592982362190917633	@RAJARIZWANRAZA6 @MaryamNSharif @Atifrauf79 @RajaShabanArif1 @qas58 کُفار کے بدکار ترین ابلیس سوؤر کے لئے ایسا تحفہ کوئی ویلیُو نہیں رکھتا جس کا ماضی اور حال صرف زنا بدکاری فتنے فساد پہ مُحیط ہے ، https://t.co/HsabqiJcSZ	@RAJARIZWANRAZA6 @MaryamNSharif @Atifrauf79 @RajaShabanArif1 @qas58 A gift like this has no value for the wickedest of the disbelievers, Iblees Soor, whose past and present are only about fornication, adultery, corruption, https://t.co/HsabqiJcSZ	NIL	NIL	Hate
1608143382672547840	تحریک انصاف میں شمولیت کی موقع پارٹی کے سابق ڈپٹی سپیکر قاسم خان سوری بھائی کو پشتون روایتی پگڑی سر پر باندھ لیا اور میں اپنے پوری صوبے بلخصوص میرے ساتھ شمولیت کرنے والے قبائلی رہنماؤں ہزاروں ورکرز کی طرف سے @QasimKhanSuri بھائی کا شکریہ ادا کرتا ہوں کہ وہ ہمارے شمولیت پر بلوچست https://t.co/LooO8noJ0O	On the occasion of joining Tehreek-e-Insaf, the former deputy speaker of the party Qasim Khan Suribhai tied a Pashtun traditional turban on his head. And I thank @QasimKhanSuri brother on behalf of the thousands of workers who have joined me, especially the tribal leaders of our entire province, for joining us in Balochistan https://t.co/LooO8noJ0O	NIL	NIL	No_Hate
1563689524248645634	پہلے بھی گزارش کی تھی ہم سب آپ کے خیر خواہ ہیں یہ گولیاں دشمن کے لیے تو سمجھ آتی ہے اپنوں کے لیے تو مسکراہٹ ہونی چاہیے ہاں آپس میں اختلاف بھی ہوتا ہے اسے بات چیت سے حل کیا جاتا ہے نا کے بندوق کی گولی سے ہمارے پاس تو یہ سہولت نہیں ہے البتہ اپنا سینہ پیش کر سکتے ہیں جو پیش خدمت ہے https://t.co/tQXqhdjuee	We have requested before. We all wish you well. These bullets are understandable for the enemy, but for ourselves, there should be a smile. Yes, there is a difference between us. Pass does not have this facility, but you can present your chest, which is a service https://t.co/tQXqhdjuee	NIL	NIL	No_Hate
1577984755043561472	آج پشاور میں بنوں تحصیل بکاخیل کے آ زاد چیئرمینوں نے پی ٹی آئی میں شمولیت اختیار کی۔ تمام چیئرمینوں کو منسٹر ٹرانسپورٹ ملک شاہ محمد خان صاحب کی نگرانی میں وزیر اعلی خیبر پختونخواہ جناب مخمود خان صاحب نے ٹوپی اور مفلر پہنائی۔ #کپتان_ہماری_ریڈ_لائن https://t.co/3OxPDqMbeq	Today, Azad chairmen of Bannu Tehsil Bakakhel joined PTI in Peshawar. Under the supervision of Transport Minister Malik Shah Mohammad Khan, Chief Minister of Khyber Pakhtunkhwa Mr. Makhmood Khan wore cap and muffler to all the chairmen. #Captain_Our_Red_Line https://t.co/3OxPDqMbeq	NIL	NIL	No_Hate
1566489209019535361	صرف ايک ہی ڈيمانڈ رياست سے کر رہے ہيں کہ خدارا ہميں امن ديں ہم بھی ايک پر امن زندگی گزارنے کا حق رکھتے ہيں رياست اپنی پشتون دشمن پاليسيوں سے باز ائے . #خیبر_امن_مارچ https://t.co/3AGNxpPteT	They are making only one demand from the state that God give us peace, we also have the right to live a peaceful life. #Khyber_peace_march https://t.co/3AGNxpPteT	NIL	NIL	Hate
1573632442149265408	@samiabrahim اور تیرے پچھواڑے میں انگلی کرنے والے صدر پاکستان کے بارے میں کیا خیال ہے جو تمہیں انگلی کرتا ہے اور تم اس قسم کی گھٹیا ٹوئیٹ کرتے ہو https://t.co/5A7iPkA8vm	What about @samiabrahim and the president of Pakistan pointing his finger in your ass? Who finger you and you tweet this kind of crap https://t.co/5A7iPkA8vm	NIL	NIL	Hate
1576482740589178880	امام بدرالدین عینی حنفی رحمۃ اللہ علیہ فرماتے ہیں، "حضراتِ حسنینِ کریمین رضی اللہ تعالیٰ عنہما کے فضائل کا نہ تو شمار ہے، اور نہ ہی مناقب کی حد و انتہا ہے۔ #یاحسن_ابن_علی_کردوکرم #Dawateislami https://t.co/KuQTEAqiH1	Imam Badr al-Din Aini Hanafi (may Allah have mercy on him) says, "The virtues of Hazrat Hasnain-e-Karimin, may God be pleased with them, are neither countable nor limitless. #Yahsan_Ibn_Ali_Kurdokaram #Dawateislami https://t.co/KuQTEAqiH1	1 ٔ ‏-ءھء)‎ ٠٦ ‏“8ج‎ 7 ان شفاعتتا ۳۱۵٭ٌ“٭2٭“٭٭ِت؛'"	6 8 c 7 These intercessions 315	No_Hate
1580153701482004481	ملاوٹ کے اس دور میں اگر اصل زہر چاہیے تو وہ صرف لوگوں کے دلوں میں ملے گا🍁 https://t.co/yfgR3DNf2k	In this era of adulteration, if the real poison is needed So he will be found only in people's hearts🍁 https://t.co/yfgR3DNf2k	NIL	NIL	No_Hate
1573513612609691653	یہ وطن دشمن شخص ایسی کوئی جرات کرنے کی صرف کوشش ھی کر دکھاے اس کی ساری پھنے خانی اس کے پچھواڑے کے راستے باہر نکال دی جاے گی https://t.co/z4hFV6OT4K	If this anti-patriotic person tries to do such a dare, his whole hide will be thrown out through his back https://t.co/z4hFV6OT4K	.۶-7 کرنے والا پاور ۲ میں سار کرنے والا چا اور	.6-7 Power to do 2 I sir The one who wants to do it	Hate
1580157860654129152	یہ تو ابی شروعات ہے آگے آگے دیکھئے ہوتا ہے کیا @TM__FLW #آزادی_مارچ_کپتان_کے_سنگ https://t.co/hGiXQspFvH	This is just the beginning, let's see @TM__FLW #freedom_march_captain_k_sing https://t.co/hGiXQspFvH	NIL	NIL	No_Hate
1580141377626611712	موجود نگہانی صورتحال، سیلاب اور شدید بارشوں کی صورت میں سندھ رینجرز شہر میں سول انتظامیہ کے ساتھ امدادی کارروائیوں میں مشغول نظر آریے ہیں - #سلام_سندھ_رینجرز - 502 https://t.co/eoWJoCsr3B	In the current surveillance situation, floods and heavy rains, the Sindh Rangers are engaged in relief operations with the civil administration in the city - #Salaam_Sindh_Rangers - 502 https://t.co/eoWJoCsr3B	NIL	NIL	No_Hate
1563473869905674241	@spreadharmonyy @arslankhalid_m میں آپ کی باتوں سے بڑا متاثر ھونے لگا تھا کہ.... آپ کا اکاؤنٹ دیکھا تو شاک لگا کہ آپ بھی محترم و مکرم #مائی_گیراجن_کے_کتورے ھو🤯 تو پائلٹ تو کیا اگر خلا نورد بھی ھوتا، تو تم نے رہنا تھا نسل در نسل غلام ذلیل پھٹواری کھوتا ہی 😁 https://t.co/XTENltgLba	@spreadharmonyy @arslankhalid_m I was getting very impressed by your words.... When I saw your account, I was shocked that you are also respectable and gracious #माई_गीराजन_के_कट्रे हू। So the pilot, even if you were an astronaut, you would have to remain a generation after generation, a slave, humiliated and lost. 😁 https://t.co/XTENltgLba	ا 7 پرے پا ریوں! و میری پو ری اورغررا یکو نے۶ عبرت سن کے ضا ےر ٥۴	A 7 beyond! And my Puri and Gharra Yaku heard 6 lessons Hurray 54	Hate
1617794008297918465	کزن سالے اتنے حرامی ھوتے ھیں چودتے بھی ھیں اور گالیاں بھی دیتے ھیں کہتے ھیں سالی حرامزادی تجھے تو میں شریف سمجھتا تھا پر تو تو بھت بڑی رنڈی نکلی اب میں تجھے اپنی رکھیل بناوں گا بول رنڈی بنے گی رکھیل لڑکی جواب میں ھوں ھا ھی کرتی ھے پاکیزہ ڈول https://t.co/uXX7jH1gVJ	Cousins ​​are such bastards They are also scolding and abusing, they say, you old bastard, I used to think you were noble, but you turned out to be a big slut. The girl says yes in response Pure Doll https://t.co/uXX7jH1gVJ	NIL	NIL	Hate
1595694574881722368	2007 میں افغانستان میں رہائشی عمارت پر ڈچ فورسز کی بمباری غیر قانونی قرار https://t.co/NITcsDtura	2007 bombing of residential building in Afghanistan by Dutch forces declared illegal https://t.co/NITcsDtura	NIL	NIL	No_Hate
1568936489194512384	Cheif of staff نے 29 نومبر 2016 کو پاک فوج کے 16ویں سربراہ کی ذمہ داری سنبھالی، جیسے جیسے وقت گزرتا گیا، دنیا باجوہ ڈاکٹرائن کی قائل ہوتی چلی گئی @OmniscientXo #WeSaluteCOASBajwa &amp; https://t.co/cL1dOXduOk	Cheif of staff took over as the 16th Chief of the Pakistan Army on 29 November 2016. As time went by, the world became convinced of the Bajwa doctrine @OmniscientXo #WeSaluteCOASBajwa &amp; https://t.co/cL1dOXduOk	NIL	NIL	No_Hate
1578368999951577088	آغا خان میوزک ایوارڈز برائے سال 2022 کے فاتحین کا اعلان کردیا گیا، دو پاکستانی لوک گلوکار بھی 16 فاتحین کی فہرست میں شامل ہیں، پاکستانی پشتو گلوکارہ زرسانگا اور پنجابی صوفی موسیقار سائیں ظہور کو خصوصی مینشن ایوارڈز ملنے پر مبارکباد پیش کرتا ہوں ۔ #AghaKhanMusicAwards https://t.co/Z88AdV2CGp	The winners of the Aga Khan Music Awards for the year 2022 have been announced, two Pakistani folk singers are also included in the list of 16 winners. #AghaKhanMusicAwards https://t.co/Z88AdV2CGp	NIL	NIL	No_Hate
1565924957674262531	عمران نیازی کی نااہل سلیکٹڈ حکومت کہاں مرگئی ہے ؟ https://t.co/X7QzXINnPI	Where has Imran Niazi's incompetent selected government died? https://t.co/X7QzXINnPI	NIL	NIL	Hate
1581304731536101376	'لمپی اسکن سے متاثر جانور کا گوشت اور دودھ مضرِ صحت نہیں' تفصیل پڑھیں: https://t.co/ELP8ETH7IF https://t.co/LdYkXOS6BK	'Meat and milk from animals infected with lumpy skin are not harmful to health' Read details: https://t.co/ELP8ETH7IF https://t.co/LdYkXOS6BK	NIL	NIL	No_Hate
1587733157570547712	اے میرےچاروں صوبوں کے پاکستانیوں حقیقی آزادی بہت بڑی نعمت ہے کسی پروپیگنڈے میں مت آنا یاد رکھنا یہ عمرانخان کی نہیں ہماری جنگ ہے.آپ چاروں صوبوں کے پاکستانیوں اتنی بڑی تعداد میں نکلنا کے ہم اپنے وسائل پر قابض ان لوٹیروں,غداروں کو پوری قوت سے شکست دے سکیں https://t.co/1lekaY4rYD	O Pakistanis of all four provinces, true freedom is a great blessing. Do not get involved in any propaganda. Remember, this is our war, not Imran Khan's. You Pakistanis of all four provinces have come out in such large numbers that we will fight these looters and traitors with full force. Can beat https://t.co/1lekaY4rYD	‎+٦‏ و خلائی کے رام سےکہشر سے	+6 and Rama of Space from Kesha	Hate
1598969536690425856	سردی سے کانپتے ہوئے زندہ جسم پر چادر ڈالنا قبروں پر چادر ڈالنے سے لاکھوں درجہ بہتر بھی ھے اور عبادت بھی ہے https://t.co/bodwKRgAYY	Covering a living body shivering with cold It is millions of degrees better than putting a shroud on the graves and it is worship https://t.co/bodwKRgAYY	5 اس عو آتھ	5 This oath	No_Hate
1593841926201278465	(1/5) باجوہ نیٹ ورک کرنل اقبال باجوہ کے چار بچے ہیں قمر جاوید باجوہ طارق باجوہ خاورہ باجوہ طاہرہ باجوہ ان میں سے صرف ایک پاکستانی نیشنل ہے جس کا نام قمر جاوید باجوہ ہے۔ جرنیل قمر باجوہ کی دو بہنیں ہیں ۔۱- خاورہ، خاوند شوکت گھمن، ۔۲- طاہرہ خاوند شجاعت گھمن https://t.co/OLm69UEMzZ	(1/5) Bajwa Network Colonel Iqbal Bajwa has four children Qamar Javed Bajwa Tariq Bajwa Khawra Bajwa Tahira Bajwa Only one of them is a Pakistani national whose name is Qamar Javed Bajwa. Jarnail Qamar Bajwa has two sisters 1- Khaora, husband Shaukat Ghaman, 2- Tahira husband Shujaat Ghaman https://t.co/OLm69UEMzZ	NIL	NIL	No_Hate
1560599659944415238	مغل یہ کون ہے یہ ہے تیرا کھوتا جس کے لئے تو دن رات ذلیل ہو تا ہے بچوں کو حرام کھلا رہا ہے اپنی آخرت خراب کر رہا ہے لعنت mule تجھ پر ۔ https://t.co/7DxiGp53r7 https://t.co/Rcw7fM9Bgd	Who is this Mughal? This is your loser, for whom you are humiliated day and night. He is feeding Haram to children. He is spoiling his hereafter. Curse is on you. https://t.co/7DxiGp53r7 https://t.co/Rcw7fM9Bgd	NIL	NIL	Hate
1606568334970986502	خواہش ہے کہ جلد شادی کروں اورمیرے بھی بچے ہوں معروف اداکارہ عائشہ عمر نے اپنی دلی خواہش کا اظہار کر دیا https://t.co/gxJu5xkQv5	I wish to get married soon and have children too. Famous actress Ayesha Umar expressed her heartfelt desire https://t.co/gxJu5xkQv5	رف رغائشہ مر نےا دا اھ رکردیا	Raf Raghaisha died	No_Hate
1565752171500638208	شاباش شہزادو ❤️👑 اب اصل امتحان اتوار کی شام بھارت سے ہے ان شاء اللہ اس امتحان میں پاکستان سرخرو ہوگا ❤️🤲 https://t.co/jVZpxBrsko	Well done Prince ❤️👑 Now the real exam is from India on Sunday evening, God willing, Pakistan will be the leader in this exam ❤️🤲 https://t.co/jVZpxBrsko	NIL	NIL	No_Hate
1594105395169341440	@chsandhilaa شہید ارشد شریف کے قتل کی مرکزی کردار مریم صفدر عرف ڈاکو رانی اور بدکردار کلیجہ چبانے والی نکلی قاتل عورت کو پھانسی لگے گی اور یہ عبرت کا نشان بنے گی نانی ڈائن کتے کی موت مرے گی إنشاءاللّٰه یہ وہ عورت ہے جو اپنے باپ کی بھی ویڈیو بنا کر بلیک میل کرنے سے پیچھے نہ ہٹے https://t.co/mcHma38BZJ	@chsandhilaa the mastermind behind the murder of Shaheed Arshad Sharif The role of Maryam Safdar aka Dako Rani and The wicked turned out to be a liver chewer The murderous woman will be hanged and This will be a sign of lesson, Nani Dayan The dog will die, God willing This is the woman who belongs to her father By making a video and blackmailing Don't hold back https://t.co/mcHma38BZJ	سد ذرائ کا دگوکی ۔ ے کہ ارسشد صشریف کی شمہساوست میں ویڈو ہلان رووحب سیامسل ے ؛ یہ ضسر داکئئ نل تد	Deception of the dam. Arshad Sashrif Widu Hilan Roohab in the Shamhsavast of Siamese; This is a sad thing	Hate
1587414403770732545	جس میں قبائلی اضلاع سے دہشت گردوں کا قلع قمع کرنے کے بعد 74 مربع کلومیٹر علاقے سے 60 ہزار سے زائد باروی سرنگیں ناکارہ بنا کر اسے کلیئر کیا گیا ۔ #WellDoneCOAS https://t.co/2OSH1Dmg3F	In which more than 60,000 landmines were cleared from the 74 square kilometer area after destroying the terrorists from the tribal districts. #WellDoneCOAS https://t.co/2OSH1Dmg3F	۱ آپریشن ىن زدالفساد " آرمی چیف جنرل باجوہ کی ہدایت پر ملک بھر میں دہشت گردی سے نمٹنے کیلئے حتمی آپریشن ردالفساد شروع کیا گیا	"Operation İn Zada ​​al-Fasaad" Malik under the direction of Army Chief General Bajwa To tackle terrorism across the board The final operation Ridalfasad begins done	No_Hate
1592552694539259906	#سعودی ولی عہد محمد بن سلمان کے عمران خان کو دیئے گئے تحائف کا خریدار بھی منظر عام پر آگیا شہزاد اکبر نے بروکر کا کردار ادا کیا #گھڑی_چور_پکڑا_گیا https://t.co/FtGXkesS4b	The buyer of the gifts given by #Saudi Crown Prince Muhammad bin Salman to Imran Khan also came to light. Shehzad Akbar played the role of a broker. #Watch_Thief_Caught https://t.co/FtGXkesS4b	NIL	NIL	Hate
1587129596910125056	@hinaparvezbutt یہ سب تو اپکو اور آپکے لیڈرز کو لعنت بھیجنے کے لیے اکھٹے ہوئے ہیں۔۔جب دفاع میں چند بیکار مراثی اور ناکارہ پارٹی ورکر بچ جائیں تو بہتر ہے ہار مان لیں https://t.co/xP5tRdqFg5	@hinaparvezbutt all these are gathered to curse you and your leaders..when a few useless Marathi and incompetent party workers are left in defence, better give up https://t.co/xP5tRdqFg5	NIL	NIL	Hate
1614506928809381888	آج کراچی اور حیدرآباد کے شہریوں کے پاس موقع ہے کہ وہ #بلے_پہ_ٹھپہ لگا کر زرداری مافیا کو شکست دیں۔ #کراچی_کپتان_کا https://t.co/I0oEUYdKe7	Today the citizens of Karachi and Hyderabad have an opportunity to defeat the Zardari mafia by putting the #bat_on_the_foot. #Karachi_Captain_Ka https://t.co/I0oEUYdKe7	NIL	NIL	Hate
1604911782706827265	ثابت ہوا جس جس نے عثمان بزدار کو ستایا اس کے حق پر ڈاکا ڈالا وہ ذلیل ہی ہوا ہے یہ کرسی صرف بزدار کی ہے اور وہی بیٹھے گا جتنی مرضی سیاست کر لو😂 #لیکر_رہیں_گے_آزادی https://t.co/BHLL68rkCF	It has been proved that the one who persecuted Usman Buzdar and robbed him of his right has been humiliated This chair belongs only to Buzdar and he will sit there and do politics as much as he wants #Lekar_Rhine_Gay_Azadi https://t.co/BHLL68rkCF	NIL	NIL	Hate
1606584516034048000	یمن اعراق لیبیا شام فلسطین کے بعد پیش خدمت ہے ایران اور اگر ماضی میں نظر دوڑائیں تو پچھلے تین سالوں میں سب سے ذیادہ اسلحہ سعودی عرب اور یو اے ای نے خریدا ہے جو ایران اور ترکی کے لیے استعمال میں لانے کے لیے پلان شدہ ہے کیونکہ ایران ہی اسرائیل کے لیے اس خطے میں سب سے ذیادہ خطرہ ہے https://t.co/wgtddErATl	After Yemen, Iraq, Libya, Syria, Palestine, Iran is the first service And if you look back, Saudi Arabia and the UAE have bought the most weapons in the last three years that are planned to be used by Iran and Turkey. Because Iran is the biggest threat to Israel in the region https://t.co/wgtddErATl	ایران 'خلیجی ممالک پر نئے حملوں کی منصوبہ بندی' کر رہا ہے: موساد چیف موساد کے سربراہ نے کہا کہ ”ہم ایران کے مستقبل کے ان عزائم کے خلاف خبردار کرتے ہیں, جنہیں وہ خفیہ رکھنے کی کوشش کر رہا ہے۔“ (فائل فوٹو: اے ایف پی)	Iran launched new attacks on Gulf countries Planning': Mossad Chief The head of Mossad said, "We are against these future ambitions of Iran." warns, which he is trying to keep secret.” (File Photo: AFP)	No_Hate
1560626975219269632	@Wabbasi007 انشاءاللہ بہت جلد اس سور کی یہ حالت ہونے والی ہے #شہباز_گل_کو_رہا_کرو https://t.co/FoAdnPte57	@Wabbasi007 God willing Very soon this condition of this pig is going to happen #Shahbaz_Gul_Ku_Raha_Kro https://t.co/FoAdnPte57	7 2100 06 طعالمصتة عصم۶ یقت( صمتائە رجہ ‎107۶7٦٣7‏ ‏ہوووں ئ0 لاپ ہے پیووقبٹوں قد سا عنطا	7 2100 06 Taalmasta Asam 6 Yaqt (Samata Rajah 10767637) How long is it? Anta	Hate
1572875798092349440	اسلام آبا د کے داخلی اور خارجی راستوں پر کنٹینرز پہنچنا شروع،راناثناءاللہ کا پلان تیار https://t.co/gPdZeyLAYh #PTIOfficial #ImranKhan #RanaSanaUllah https://t.co/nSHou7JADw	Containers at the entry and exit points of Islamabad Starting to arrive, Ranasanaullah's plan is ready https://t.co/gPdZeyLAYh #PTIOfficial #ImranKhan #RanaSanaUllah https://t.co/nSHou7JADw	کے رز پاش رو ءراتا ءال کاپان ار	K. Riz Pash ro ra rata al kapan ar	No_Hate
1564545615069052929	@samiya_yasmine @iHShaheen جنہوں نے جھنڈے کا پاس رکھا وہ بھی غدار بنا دیے گئے تیرے ناجائز باپوں نے۔ اب تو باجوہ کے چاٹ اور غداری کا منجن بیچ۔ نوجوان پڑھے لکھے تیری گندی زبان جے بہکاوے میں نہیں آئیں گے۔ محسن داوڑ کی ناجائز اولاد اور باجوہ کی بھتیجی #BajwaTraitor #BajwaSoldTheNation https://t.co/fqebTJjXtY	@samiya_yasmine @iHShaheen those who guarded the flag were also made traitors by your illegitimate fathers. Now you are in the middle of Bajwa's lick and treachery. Young educated people will not be seduced by your dirty language. Illegitimate child of Mohsin Dawar and niece of Bajwa #BajwaTraitor #BajwaSoldTheNation https://t.co/fqebTJjXtY	NIL	NIL	Hate
1592729660395515906	فیصل واوڈا کے بعد خرم روکھڑی اور خرم روکھڑی کے بعد عمر ظہور ایک سے بڑھ کر ایک ناکارہ کارتوس https://t.co/Xa7xRGgPGe	After Faisal Vawda, Khurram Rokhri and Umar Zahoor after Khurram Rokhri, one more dead cartridge https://t.co/Xa7xRGgPGe	NIL	NIL	Hate
1578008742829834240	#پشاور حسن خیل میں سییکورٹی فورسز کی کارروائی میں تین دہشت گردوں کی ہلاکت کی اطلاع:#غیرسرکاری_ذرائع https://t.co/j6HVYWl91D	Three terrorists killed in #Peshawar Hassan Khel operation by security forces: #Unofficial_sources https://t.co/j6HVYWl91D	NIL	NIL	No_Hate
1614498120590655488	غلامی سے آزادی تک نکلو پاکستان کی خاطر اپنی اگلی نسلوں کی خاطر نصر من اللہ و فتح قریب #کراچی_میں_بلا_چلے_گا #بلے_پہ_ٹھپہ #حیدرآباد_کپتان_کا #کراچی_کپتان_کا https://t.co/XL4yeh5Vrt	From slavery to freedom Get out for the sake of Pakistan For the sake of our future generations Nasr from Allah and victory near #Hyderabad_Kaptan_Ka #Karachi_Kaptan_Ka https://t.co/XL4yeh5Vrt	5ا جنوری کوووٹ کے ذریعے بت	5th January by Kovot idol	No_Hate
1560136456919781378	شہید ذوالفقار علی بھٹو اور شہید محترمہ بے نظیر بھٹو کے وفادار اور قریبی ساتھی بابائے لیاری سابق رکن قومی اسمبلی .مشیر ایکسائز نارکوٹکس وزیر اعلیٰ سندھ. سابق ممبر سینٹرل ایگزیکٹو کمیٹی پاکستان پیپلز پارٹی. لیاری حاجی عبدالرحیم بلوچ مرحوم کی سابق صدر پاکستان آصف علی زرداری کے. https://t.co/TOlfGoDOzK	Baba Lyari, loyal and close companion of Shaheed Zulfikar Ali Bhutto and Shaheed Ms. Benazir Bhutto. Former Member Central Executive Committee Pakistan People's Party. Former President of Pakistan Asif Ali Zardari of Late Lyari Haji Abdul Rahim Baloch. https://t.co/TOlfGoDOzK	NIL	NIL	No_Hate
1578717173488717824	خودکش دھماکے میں تعلیمی ادارے کو نشانہ بنایا جس میں متعدد خواتین کی ہلاکت ہوئی 🔗 https://t.co/dJ2EKXa4rM https://t.co/Wq5P4DSgUP	A suicide blast targeted an educational institution in which many women were killed 🔗 https://t.co/dJ2EKXa4rM https://t.co/Wq5P4DSgUP	ایرانی مظاہروں سے حوصلہ ملا: ۱ افغان خواتین سڑکوں پر نکل آئیں ۵	Encouraged by Iranian protests: 1 Afghan women took to the streets	No_Hate
1596830174536142849	راز جو کچھ ہو اشاروں میں بتا بھی دینا ہاتھ جب اس سے ملانا تو دبا بھی دینا اور ویسے اس خط میں کوئی بات نہیں ہے پھر بھی احتیاتن اسے پڑھلو تو جلا بھی دینا #سرمایہ_زیست #اپنی_زبان_اردو https://t.co/Cq9I3XBRnZ	Whatever the secret is, tell it in gestures When you touch your hand with it, press it And by the way, there is nothing in this letter Even if you read it carefully, burn it #سرمايه_زيست #عبني_زبان_عردو https://t.co/Cq9I3XBRnZ	NIL	NIL	No_Hate
1608655588921344000	آپ کا حسین نورانی چہرہ مشکل کشائی کا کام دیتا ہے_________♥️♥️🌼 اس حسین چہرے سے صبح کا آغاز ✨💗 @ItsMadina3 #RizviWarriors https://t.co/EWV1ogXdPD	Your beautiful light face gives a difficult task _________♥️♥️🌼 Morning starts with this beautiful face @ItsMadina3 #RizviWarriors https://t.co/EWV1ogXdPD	NIL	NIL	No_Hate
1617587756699353094	بھڑکائیں مری پیاس کو اکثر تری آنکھیں صحرا مرا چہرا ہے سمندر تری آنکھیں میں سنگ صفت ایک ہی رستے میں کھڑا ہوں شاید مجھے دیکھیں گی پلٹ کر تری آنکھیں https://t.co/9s9t6q3ki4	Inflame the dying thirst often with teary eyes The desert has a dead face and the sea has three eyes I am standing on the same path Maybe the eyes will see me https://t.co/9s9t6q3ki4	NIL	NIL	No_Hate
1593556382522933250	دھندا ہے پر گندا ہے😂😂 https://t.co/VpYUEIpPu9	It's foggy but it's dirty😂😂 https://t.co/VpYUEIpPu9	کاش!! میری بچی تم نے برطانوی جج کی ویڈیو بنائی ہوتی تو ہمیں یہ دن کبھی نہ دیکھنے پڑتے۔ و	I wish!! My girl, you should have made a video of a British judge So we never have to see these days. And	Hate
1587457650236788736	اس جذبے کو شکست دینا نا ممکن ہے https://t.co/xoJtn5YOMU	Impossible to beat this passion https://t.co/xoJtn5YOMU	NIL	NIL	No_Hate
1617826963737178118	تمام ممالک کو موسمیاتی تبدیلیوں سے نمٹنے کے لیئے ہنگامی بنیادوں پر کام کرنا ہوگا،وزیر خارجہ بلاول بھٹو زرداری @BBhuttoZardari @sharjeelinam @SumetaSyed https://t.co/1Xr6Mm08dg	All countries have to work on an emergency basis to deal with climate change, Foreign Minister Bilawal Bhutto Zardari @BBhuttoZardari @sharjeelinam @SumetaSyed https://t.co/1Xr6Mm08dg	تام مالک کو میا یمتیدیلیوں سے ضن کے لیے ہکات نفیادد ت ای کام کر نا ہوگا - ط ثریں یزیر ی و وزھ غارچ ااول مو زرراری	To the owner of the house, I am grateful to you For - i The words are Yazir and Wuzh Gharch Awal Mo Zarrari	No_Hate
1587735372884475904	لڑکپن ۔ جوانی ۔ ادھیڑ عمری ۔ بڑھاپا ۔ آخر کار Dust bin تیری قبر۔ https://t.co/m9ZP3J8ybO	boyhood youth middle age old age Finally Dust bin your grave. https://t.co/m9ZP3J8ybO	8-6 ۲٢ا٥‎ چواە دہ ەل <؟٭0؟7<ہ :ہہ	8-6 22 A5 Come on <?٭0?7<H: Huh	No_Hate
1568936841067335680	بالا کوٹ پر بھارتی جارحیت کا منہ توڑ جواب دیکر انہوں نے انتہائی کشیدہ صورتحال میں فوج کا مورال بلند کیا، #WeSaluteCOASBajwa !! https://t.co/ZdAkvmmbuj	He raised the morale of the army in a very tense situation by responding to the Indian aggression at Balakot, #WeSaluteCOASBajwa !! https://t.co/ZdAkvmmbuj	اکا نکی لیم ریاست خوش اور خوشال بھی ہوسکتی ہے ہو کہ جب ہر متا سیاسی واشسنگی سے مبراہ وک رون کے لیے سوپے	Aka Niki Laim state happy and happy It may also be that when every Mbarah vik ron from meta-political washingsangi Soups for	No_Hate
1593185771066101760	ہر نسل نسلی نئی ہوندی 💯 https://t.co/YcDxQ6MaFr	Every generation is a new generation 💯 https://t.co/YcDxQ6MaFr	NIL	NIL	Hate
1592989520437608449	مادرچود اپنا بھوسڑہ اٹھا کر سرکاری حج پر جانا جائیز تھا؟ بھڑوی لندن کے فرسٹ کلاس ٹرپس اپنا بھوسڑہ دے کر لئے تھا مادرچود لوہار سے؟ مادرچود مسلمانوں تم کتنی بھی گانڈ فوجیوں اور امیریکنز سے مروا لو پھر بھی عمران خان کی جھانٹ کے بال برابر بھی تم تم ماں کے لوڑے IK کو میلا نہیں کرسکتے۔ https://t.co/mlHPcl7bAW https://t.co/YWo70CCxnK	Was it permissible for Mother Choud to go on official Hajj by lifting her straw? Did Bharvi buy first class trips to London from Mother Choud Lohar? Mother of Muslims, no matter how much you die from the soldiers and Americans, still you can't even match the hair of Imran Khan's Jhant. https://t.co/mlHPcl7bAW https://t.co/YWo70CCxnK	NIL	NIL	Hate
1565327734267600898	باجوہ پھٹو #امپورٹڈ_حکومت_نامنظور https://t.co/s3cs8ed8KQ	Bajwa burst #imported_government_disapproved https://t.co/s3cs8ed8KQ	NIL	NIL	Hate
1566109995200118785	2 حالانکہ بھیڑیے نے کچھ بھی نہیں کیا تھا، خوف اور تناؤ نے بھیڑ کو ختم کر دیا جب کہ دوسری بھیڑ جس نے بھیڑیا کو نہیں دیکھا تھا وہ پرسکون اور صحت مند تھی۔ اس تجربے میں ابن سینا نے جسمانی صحت پرخوف کے مثبت اور منفی اثرات کو ثابت کیا۔ https://t.co/JmkIPHJoG3	2 Although the wolf had done nothing, Fear and stress killed the sheep while the other sheep that had not seen the wolf were calm and healthy. In this experiment Ibn Sina proved the positive and negative effects of fear on physical health. https://t.co/JmkIPHJoG3	٦اا‏ ہے 72 ‎٠ ۵:1۰۵۵‏ ا2ا	It is 6 72 05:1055 A2a	No_Hate
1574359234661294081	*آج جہاد ایک اختیاری نعمت ہے اگر ہم نے اس نعمت کی قدر نہیں کی تو عنقریب وہ وقت آنے والا ہے جس وقت کا لڑنا اضطراری ہوگا اور ہر شخص کو مجبوراً نکلنا پڑے گا.* #اسلاف_امہ https://t.co/qERQgvFGWW	Today, Jihad is an optional blessing. If we do not appreciate this blessing, the time will soon come when fighting will be reflexive and everyone will have to leave. #اسلاف_امه https://t.co/qERQgvFGWW	۵۶۲ قم۸۴ھ	562 BC 84 AH	No_Hate
1578756890741596162	سگریٹ جسے سلگتا ہوا کوئی چھوڑ دے اس کا دھواں ہوں اور پریشاں دھواں ہوں میں عمیق حنفی. https://t.co/rLHU4konsi	A cigarette that someone leaves burning I am his smoke and I am the smoke of anxiety Deep Hanafi. https://t.co/rLHU4konsi	NIL	NIL	No_Hate
1617813481419583491	باپ کے پیسے پر نہیں ،غریب عوام کے پیسے پر internship کرانے پر Neurals کا شکریہ۔ کیا 22 کروڑ لوگوں میں اس گدھے سے قابل کوئی نہیں تھا FM کہ اس عہدے کے لیے،جو اسے ہم پر مسلط کیا گیا۔ اور اب یہ گدھا وزیراعظم بنے کے سپنے دیکھ رہا ہے۔ #امپورٹڈ_حکومت_نامنظور https://t.co/pHlcmxjQGj	Thanks to Neurals for conducting internship on poor people's money, not on father's money. Was there no one among the 22 crore people more qualified than this donkey FM for this position, which was imposed on us. And now this donkey is dreaming of becoming the prime minister. #imported_government_disapproved https://t.co/pHlcmxjQGj	NIL	NIL	Hate
1598974144103976961	@ImranRiaztweets گدھا گدھا گدھا گدھا گدھا گدھا گدھا گدھا گدھا گدھا گدھا گدھا گدھا گدھا گدھا گدھا گدھا گدھا گدھا گدھا گدھا گدھا گدھا گدھا گدھا گدھا گدھا گدھا گدھا گدھا گدھا گدھا گدھا گدھا گدھا گدھا گدھا گدھا گدھا گدھا گدھا گدھا گدھا گدھا گدھا گدھا گدھا گدھا گدھا گدھا گدھا گدھا گدھا گدھا https://t.co/jUmjO1mg5h	@ImranRiaztweets Donkey Donkey Donkey Donkey Donkey Donkey Donkey Donkey Donkey Donkey Donkey Donkey Donkey Donkey Donkey Donkey Donkey Donkey Donkey Donkey Donkey Donkey Donkey Donkey Donkey Donkey Donkey Donkey Donkey Donkey Donkey Donkey Donkey Donkey Donkey Donkey Donkey Donkey Donkey Donkey Donkey Donkey Donkey Donkey Donkey Donkey Donkey Donkey Donkey Donkey Donkey https://t.co/jUmjO1mg5h	NIL	NIL	Hate
1579508427675815937	سوات کے لوگوں کو صرف امن چاہيے اور کچھ نہيں آج صبح سوات ميں سکول وين پر فائرنگ سےایک شخص شہید اور2 بچے زخمی ہوگئے تھے لاش سڑک پر رکھ کر دھرنا جاری ہے۔ Swat Gali Bagh. #wewantpeaceinswat #Swat #SwatRejectsMilitancy #PashtunLivesMatter #سوات_اولسی_پاڅون https://t.co/xawXWOZiTO	The people of Swat only want peace and nothing else. One person was martyred and 2 children were injured in the firing on a school van in Swat this morning. Swat Gali Bagh. #wewantpeaceinswat #Swat #SwatRejectsMilitancy #PashtunLivesMatter #Swat_Olsi_Paćoon https://t.co/xawXWOZiTO	NIL	NIL	No_Hate
1562996291604402176	نہ کمر درد نہ دل کا دورہ نہ پلیٹلیٹس کی کمی نہ کوئی اور بہانہ مرد کا......بچہ ہے مردوں کی طرح......کھڑا ہے اور مقابلہ........کر رہا ہے۔ #اسلام_دشمن_ڈیزل ❤️❤️❤️❤️❤️❤️ #عمران_خان_ہماری_ریڈ_لائن https://t.co/n6G8NVxRSl	No back pain No heart attack No lack of platelets No other excuse The man has a child Like men......stands And Competing........is doing. #Islam_Enemy_Diesel ❤️❤️❤️❤️❤️❤️ #Imran_Khan_Our_Red_Line https://t.co/n6G8NVxRSl	NIL	NIL	No_Hate
1581910235383443456	جعفرآباد کا گوہر نایاب محمد قاسم بگٹی نیشنل یوتھ ایوارڈ یافتہ بھی حالیہ سیلاب متاثرین میں شامل https://t.co/Kyem4teiQG https://t.co/KELc76lEqC	The gem of Jafarabad, Mohammad Qasim Bugti, winner of the National Youth Award, is also among the recent flood victims https://t.co/Kyem4teiQG https://t.co/KELc76lEqC	NIL	NIL	No_Hate
1608011496956502017	کامران بنگش / اسلام آباد خودکش دھماکہ اسلام آباد میں پولیس جوان کی شہادت پر انتہائی دُکھ اور افسوس ہوا۔ اسلام آباد کو بڑی تباہی سے بچانے والے شہید پولیس اہلکار کو خراج تحسین پیش کرتے ہیں۔ صوبائی وزیر @kamrankbangash #Islamabad https://t.co/xSIsb4VY6J	Kamran Bangash / Islamabad suicide blast There was great sadness and regret over the martyrdom of a police jawan in Islamabad. Tributes to the martyred policeman who saved Islamabad from major disaster. Provincial Minister @kamrankbangash #Islamabad https://t.co/xSIsb4VY6J	کامران بنگش / اسلام آباد :۲8۳۱ تک خودکش دھماکہ اسلام آباد میں پولیس جوان کی شہادت پر انتہائی دکھ اور افسوس ہوا۔ اسلام آباد کو بڑی تباہی سے بچانے والے شہید پولیس اہلکار کو خراج تحسین پیش کرتے ہیں۔ ہماری سیکیورٹی فورسز کی لازوال قربانیاں ملک خداداد کی بقاء اور سلامتی کے لئے صدیوں صوبائی وزیر کامران خا ‎7۲۵٢.0‏ یاد رکھی جائیں گی۔ ن بنگڈ	Kamran Bangash / Islamabad : Up to 2831 Suicide bombing Deeply saddened by the martyrdom of a police jawan in Islamabad Sorry. Martyrs who saved Islamabad from great destruction Kudos to the policeman. Our Malik Khudadad made eternal sacrifices of the security forces Centuries for survival and security Provincial Minister Kamran Kha 7252.0 Will be remembered. N Bangad	No_Hate
1562983310112227330	منشیات خاص طور پر کوکین کے عادی افراد کی آنکھوں کے نیچے سوجن آجاتی ہے جسے چھپانے کیلئے کپتان کالا چشمہ پہنتا ہے لیکن آج چونکہ جج کے سامنے پیش ہونا تھا اور وہاں کالا چشمہ اتروادیا جاتا اس لئے سوجن نمایاں طور پر نظر آرہی ہے۔ https://t.co/pixHye0rgu	The drug, especially cocaine addicts, causes swelling under the eyes, which the captain wears dark glasses to hide, but today, as he had to appear before the judge and the dark glasses were removed, the swelling is prominently visible. https://t.co/pixHye0rgu	NIL	NIL	Hate
1558099660094717953	پاکستان کی آزادی کے 75 سال بعد بھی پاکستانی فوج کے مستقبل کے جرنیل اسی اکیڈمی سے تیار ہوتے ہیں جہاں انگریز آزادی سے پہلے اس قوم کو غلام رکھنے کیلئے تیار کرتا تھا۔ ماشاءاللہ #PakistanZindabad #PakistanArmy https://t.co/FIQHfPnzqi	Even after 75 years of Pakistan's independence, the future generals of the Pakistani army are prepared from the same academy where the British used to train the nation to keep it as a slave before independence. Mashallah #PakistanZindabad #PakistanArmy https://t.co/FIQHfPnzqi	7٦ 2 8۳ ۸850181 سس 01	76 2 83 8850181 Sis 01	No_Hate
1573963805343752195	پاک فوج ہر وقت بیرونی خطرات اور اندرونی خلفشار کا مقابلہ کرنے کیلئے تیار رہتی ہے۔ پاک فوج پاکستانیوں کے شانہ بشانہ کھڑی ہو جاتی ہے۔ #PakArmy_FloodReliefOps https://t.co/TIYrx3DMd6	Pakistan Army is always ready to face external threats and internal distractions. Pakistan Army stands by the side of Pakistanis. #PakArmy_FloodReliefOps https://t.co/TIYrx3DMd6	قومکی خدم تکیلئے ہردقت حاضر پاکتان کےسیلاب سے سارہ علاقوں میس یا کو کا ریلیف آ یرگن خوراکء پناہگا ہیں اورادد یا تن راب مکی جاردی ہیں ہت کے -ے رےچچعحسرا ۳ >7	The flood of Pakatan present immediately to serve the nation From all the areas of the mess or the relief organization Food is Panaga and Addad or Tan Rab is Makki Jardi 3 > 7	No_Hate
1606902930367713280	کیا فائدہ اتنی مال و دولت کا جب برانڈڈ کپڑے پہن کے بھی لگے "لنڈے دا مال اے.😹😂🙈 https://t.co/407yKI6fm9	What is the use of so much wealth and wealth when even wearing branded clothes, it says "Linde da mal ai. 😹😂🙈 https://t.co/407yKI6fm9	NIL	NIL	Hate
1581500677074796545	بغضِ علی ع کی راہ جہنم ہی جائے گی.. ہوجاؤ دفن چاہئے نبی ص کے آس پاس.. https://t.co/k0wXD1tfTM	The path of hatred of Ali will go to hell. Should be buried near the Prophet.. https://t.co/k0wXD1tfTM	NIL	NIL	Hate
1606606772177076225	جنرل الیکشن کا پی ڈی ایم کے کرپٹ سسلین مافیا لیڈروں طاقتور درندوں پر لرزہ طاری خوف ڈر عمران خان دوتہائی اکثریت سے الیکشن جیتے ہماری چودراہٹ ختم 😁😂😂😂😂😂 https://t.co/pC8rfTrWZP	PDM's corrupt Sicilian mafia leaders of the general election are afraid of the powerful beasts. Imran Khan won the election with a two-thirds majority.	عمران خان تو با ذر ہے ہی لیکن اس نے اپنی عوام کے دِلوں سے بھی خوف نکال دیا	Imran Khan is the only one But He won the hearts of his people Removed fear from	Hate
1562096872000471040	خان صاحب ہزاروں فارن فنڈ ڈ ڈالر ماہانہ دے کر پاکستان کے ایٹمی پروگرام کی دشمن فرم کو حوالے کر کے آپ کیا کرنا چاہتے تھے ؟ #عمران_جواب_دو https://t.co/gwXsKRoZLC	Khan sir, what did you want to do by handing over thousands of foreign fund dollars per month to a firm hostile to Pakistan's nuclear program? #Imran_answer_two https://t.co/gwXsKRoZLC	NIL	NIL	Hate
1571403450914689024	ابھے بوسڑی والوں اس ایک تصویر کوایسے پوسٹ کیا ہے جیسے یہ ارتغل کا بیٹا ہے۔پوری ویڈیو دیکھو وہ سب شہباز شریف کو کہہ رہے ہیں کہ آگے آکے کھا لے پیچھے سے جیب نا کاٹ لئی۔۔🤣🤣🤣 https://t.co/ijl049kwsX	Abhay Bosari people have posted this one picture as if it is Ertugal's son. Watch the whole video. They are all telling Shahbaz Sharif to come forward and eat, don't cut his pocket from behind. co/ijl049kwsX	NIL	NIL	Hate
1571620586253873153	ٹرانس جینڈر بل پاس ھوتے ھی۔ خسرا پرویز اور بلو رانی نے ٹھمکے لگانے شروع کر دئے۔۔۔۔۔ شیخ رشید نے کھانے پر بلا لیا۔۔ (کھسر پھسر نیوز۔)۔۔ https://t.co/5BuXFZVyUD	Transgender Bill passed. Khusra Parvez and Balu Rani started to put up a thumka. Sheikh Rasheed called for food. (Khasar Fusar News.). https://t.co/5BuXFZVyUD	NIL	NIL	Hate
1558875014014930944	لاکھوں شوہر کے دلوں میں ہوگی کروڑوں غلام ابو کے آنکھوں کی ٹھنڈک تعلیم بنا تمیزاور روشن بغیر دماغ پاکستان میںPDM کی شان جان مان ملکوتی سحر انگیز حسن کون ہے اس کا اصل مالک کشمیر سے لے کر کراچی تک سب بھگورے کی ایک بیٹی کیا مریم نواز بازارو وزیر اعظم ہوگئی 🤣🤣🤣🤣🤣 https://t.co/VFMSpUcD1S	Will be in the hearts of millions of husbands The coolness of millions of Ghulam Abu's eyes Education without distinction and enlightenment without mind Glory of PDM in Pakistan Who is the real owner of the magical beauty? All from Kashmir to Karachi, a daughter of Bhagura Did Maryam Nawaz Bazaru become the Prime Minister? 🤣🤣🤣🤣🤣 https://t.co/VFMSpUcD1S	NIL	NIL	Hate
1576813592413732864	جب سکون کی کمی محسوس کرو تو توبہ کرو کیونکہ انسان کے گناہ اسے بے چین رکھتے ہیں...!! سانس سگنل ہے کبھی کم کبھی کثرت میں ملے، زندگی کال ہے اک لمحے میں کٹ سکتی ہے...!! #عائشہ_حنفی 🧡🤍💚🧡🤍💚🧡🤍💚 https://t.co/U3wLl5AbKM	When you feel a lack of peace, repent Because man's sins keep him restless...!! Breathing signal is sometimes found in abundance, sometimes infrequently. Life is a call, it can be cut in a moment...!! #Aisha_Hanafi 🧡🤍💚🧡🤍💚🧡🤍💚 https://t.co/U3wLl5AbKM	NIL	NIL	No_Hate
1562320293309415424	#باولا_نیازی نیازی اس وقت اقتدار کے لئے کچھ بھی کر سکتا ھے یہاں تک کہ ملک میں دنگا فساد بھی https://t.co/fklyXIP4vO	#Baola_neazi Niazi can do anything for power at this time even riots in the country https://t.co/fklyXIP4vO	اناگ ی7اض اھ<ا عوام کو رر زیر بقاوت اور فاد پ اکا را	Anag y7az ah<a Under the people Baqawat and Fad P Akara Ra	Hate
1565274637109407745	برطانوی شہری شہزادہ ہیری اور میگھن مرکل کو ناپسند کرتے ہیں! - https://t.co/JSar7H6CxT https://t.co/8YYNVj5c1e	British citizens dislike Prince Harry and Meghan Markle! - https://t.co/JSar7H6CxT https://t.co/8YYNVj5c1e	NIL	NIL	No_Hate
1560157033986490368	یہ مجاہدوں کی ہیں برکتیں یہ شہادتوں کا سرور ہے یہ ملک 🇵🇰 جو نہیں ہوا فنا یہی اپنا فخر و غرور ہے 🇵🇰❤️⚔️ پاک وطن تیری عظمت کو سلام🇵🇰💚 🇵🇰⚔️ پاک فوج زندہ باد پاکستان پائندہ باد 🇵🇰⚔️ #LoveYouPakArmy https://t.co/1XEVk1uOju	These are the blessings of the mujahids, this is the server of testimonies This country 🇵🇰 which has not perished is its pride and pride 🇵🇰❤️⚔️ Salutations to your majesty of the holy land 🇵🇰⚔️ Long live Pak Army Long live Pakistan 🇵🇰⚔️ #LoveYouPakArmy https://t.co/1XEVk1uOju	جا ع زیڈ یلو کہ ج رک مت پھر لوک ابی زندہ و ا رکڑرے یں	Don't stop if you go Then Lok Abi was alive and well	No_Hate
1568126643956236289	کپتان برطانیہ کے نئے بادشاہ کے ساتھ https://t.co/7BspiMzrsK	Captain with Britain's new king https://t.co/7BspiMzrsK	NIL	NIL	No_Hate
1563480605060661249	فرزند لیاری عبداللہ رحیم بلوچ ملازمین سے اظہارِ یکجہتی اور ملازمین کی داد رسی کے لیے فشر مینز کوآپریٹو سوسائٹی پہنچ گئے.... فشر مینز کوآپریٹو سوسائٹی کے ملازمین کورٹ سے بحالی کے بعد چیرمین آفس کے سامنے جوائننگ نہ دینے کے خلاف احتجاجی مظاہرہ کر رہے ہیں..... https://t.co/Z89D0A1lPL	Son of Lyari Abdullah Rahim Baloch reached the Fishermen's Cooperative Society to express solidarity with the employees and to treat the employees. Employees of Fishermen's Cooperative Society are protesting against non-joining in front of the chairman's office after being reinstated by the court..... https://t.co/Z89D0A1lPL	NIL	NIL	No_Hate
1605621038380826624	#گلگت مناور کے عوام کے ساتھ ذیادتی کسی صورت میں بھی برداشت نہیں کی جائیگی حکومت اپنا قبلہ درست کرے مناور کی زمینیں مناور کے عوام کی ملکیت ہے پیپلزپارٹی مناور کے عوام کے ساتھ کھڑی ہے ※※※جمیل احمد سینئر نائب صدر پیپلزپارٹی گلگت بلتستان خالصہ سرکار نامنظور @JamilAhmad_PPP https://t.co/938UsdNPFg	#Golgat Aggression with the people of Manawar will not be tolerated under any circumstances. The government should correct its Qibla. The lands of Manawar are the property of the people of Manawar. PPP stands with the people of Manawar. ※※※ Jameel Ahmad Senior Vice President PPP Gilgit-Baltistan Khalsa Sarkar Disapproved @JamilAhmad_PPP https://t.co/938UsdNPFg	امت 8 امت	Ummah 8 Ummah	No_Hate
1567392818846474240	الطاف حسين بیرون ملک بیٹھ کر ملک کے خلاف بولتا تھا عمران خان ملک کے اندر بیٹھ کر مغلظات بک رہا ہے #سستا_الطاف_حسین https://t.co/7PGBNhXQ0r	Altaf Hussain used to sit abroad and speak against the country, Imran Khan is sitting inside the country and selling lies #ساستا_التاف_حسين https://t.co/7PGBNhXQ0r	تھرالن خالن اور الطاف نین یں صرف اتناظر ٤ے‏ کہ الطاف تسین بب رون ملک بی ےکر ادارول کے غلاف کو ا لک ہاہے او حم رالن خالن مک کے اندر بی ھکر	Tharalan Khalan and Altaf Nain are the only 4 That Altaf Tasin is the cover of Ron Malik Bekar Dastool Ko alak hahe o ham ralan khalan muk inside bi hakar	Hate
1617836278741094402	سویڈن میں قرآن پاک کی بے حرمتی کرنے والے کو عبرت کا نشان بنایا جائے #HurmatEQuran https://t.co/ebIjGv48S9	Whoever desecrates the Holy Quran in Sweden should be made a sign of lesson #HurmatEQuran https://t.co/ebIjGv48S9	NIL	NIL	No_Hate
1564232390758858752	بچی بھو سوچنے پر مجبور ہے کے یہ #فنڈ_چور_نانی بھی کتنی بڑی ڈرامےباز ہے https://t.co/wDOQw1fo47	Bachi Bhu is forced to think that this #Fund_Chur_Nani is also a great dramatist https://t.co/wDOQw1fo47	NIL	NIL	Hate
1561749210948567040	ہم سے کروڑ درجے بہتر تو یہ بچی ہے جو اپنی جان کی پرواہ کیے بغیر ایک جانور کو بچا رہی ہے. #بےحس_حکمران_ڈوبتی_عوام https://t.co/TlrlLtSrF4	Millions of times better than us, this girl is saving an animal without caring about her own life. #Blessed_Rulers_Dubti_People https://t.co/TlrlLtSrF4	NIL	NIL	No_Hate
1598609262426701824	تم ایک چہرا بھول سکتے ھو لیکن تم کسی کے جذبات کی حرارت، ادا کی نزاکت اور آواز کی مٹھاس کو اپنی یاد سے بلکل نہیں مٹا سکتے ۔۔ @Sara_SweetC @BiBISOFIA__ https://t.co/kvpphql4zo	You can forget a face But you are the heat of one's feelings, Fragility of payment And to the sweetness of the voice You can't completely erase from your memory. @Sara_SweetC @BiBISOFIA__ https://t.co/kvpphql4zo	NIL	NIL	No_Hate
1557696008959795200	@Drsamina19 یہ جہاز اپنے اندر گھسا لے رنڈی کی بچی۔ https://t.co/CIYRdOZ5yz	@Drsamina19 get this ship inside you randy girl. https://t.co/CIYRdOZ5yz	NIL	NIL	Hate
1593846449061580800	کسی کو یہ کہنے کی نوبت نہ آنے دینا کہ "وَافُوضَ امری الی اللہ" میں اپنا مقدمہ اللہ کے ہاں پیش کرتا ہوں. یاد رکھنا کسی کے یہ کہنے سے پہلے معاملہ سُلجھا لینا کیونکہ اُس کے ہاں نہ جج بکتے ہیں نہ ہی گواہ خریدے جاسکتے ہیں اور نہ ہی وکیل اُس کے فیصلے پھر ٹلتے نہیں وہاں ترازو بھی .! https://t.co/1lzuFOXZhd	Don't let anyone tell you "Delegating command to Allah" I submit my case to Allah. remember Address the issue before anyone else says it Because with him neither judges can be sold nor witnesses can be bought And neither does the lawyer His decisions do not waver, there are also scales. https://t.co/1lzuFOXZhd	دممجہ ہے داعجد عجد ہہ مج ہد مہ	Dammjah hai daajd ajd hah majhad mah	No_Hate
1576825027458174976	مقبوضہ مغربی کنارے میں صیہونی فورسز نے مزید 2 فلسطینیوں کو شہید کر دیا #Israel #Palestine https://t.co/byZuhyPbrV https://t.co/qHc0Me4ldM	Zionist forces martyred 2 more Palestinians in occupied West Bank #Israel #Palestine https://t.co/byZuhyPbrV https://t.co/qHc0Me4ldM	NIL	NIL	No_Hate
1565751781594116096	Breaking news😂😂 مخالف ٹیم کو اتنی جلدی آؤٹ کرنا اخلاقی جرم ہے آئ سی سی پاکستان کو دوبارہ شروع سےباؤلنگ کرانے کا حکم دیتی ہے !!😀🤣😄😉🤠😁😁!!😂 https://t.co/4aY3yS4LDT	Breaking news😂😂 It is a moral offense to dismiss the opposing team so early ICC orders Pakistan to start bowling again !!😀🤣😄😉🤠😁😁!!😂 https://t.co/4aY3yS4LDT	328 )200088( )10.400۷88( ۲۸/81۸11 ۷۵۸ 8۷ 6 5	328 (200088) (10.400788) 28/81811 758 87 6 5	No_Hate
1579756605239095297	کبھی کبھار لوگ ہماری ذات اور جذبات کی اس قدر خوبصورتی سے تذلیل کر جاتے ہیں کہ جب وہ لمحے دماغ میں گردش کرتے ہیں تو ہماری روح تک لرز جاتی ہے💔🙂 https://t.co/AmcQaHPhUU	Sometimes people humiliate our self and feelings so beautifully that when those moments go through our mind, our soul trembles💔🙂 https://t.co/AmcQaHPhUU	NIL	NIL	No_Hate
1587756549585387520	مسلم لیگ پیپلز پارٹی اور پی ٹی آئی سب اسٹیبلشمنٹ کی چھتری تلے آزمائے گئےاور ناکام ہوئے #لڑائی_ساری_فیڈرکی https://t.co/ohFpotmm60	Muslim League People's Party and PTI were tried under the umbrella of establishment and failed #Fight_All_Fedric https://t.co/ohFpotmm60	لیک یز رن یر لال ے8 بل سس اہ 0 اورناکام ہوئے ص ۲ل صرف جماعت اسلال٤ڑدے‏ و86 لے	Leakes Run Yer Lal 8 bill sis uh 0 and failed P. 2L only Jamaat Islal 4rd And 86 take	No_Hate
1567263694534414343	ڈی سی صاحب کیچ کی شکار پر پابندی۔۔ تاکہ پرند/جانوروں کی نسل کشی نہ ہو۔ اچھی بات ہے۔ لیکن منشیات/نشہ سے جو انسانی نسل تباہ ہورہی ہے، تربت اور اطراف میں سرعام منشیات بیچا جارہا ہے اس پہ پابندی کیوں نہیں؟؟ https://t.co/3fDVfCX80y	DC Mr. Catch ban. So that there is no breeding of birds/animals. Good point. But the human race is being destroyed by drugs/addiction, why is there no ban on drugs being sold in Turbat and surrounding areas? https://t.co/3fDVfCX80y	NIL	NIL	No_Hate
1574396340276285443	ایبٹ آباد: وفاقی وزیر برائے پارلیمانی امور و جنرل سیکرٹری خیبرپختونخواہ مرتضیٰ جاوید عباسی صاحب نے ایبٹ آباد اپنی رہائش گاہ ضلع ایبٹ آباد سے آئے ہوئے مختلف مقامات سے مسلم لیگی ورکرز سے پیبلک ڈے کے موقع پر ملاقات کی اور انکے مسائل سنے۔ https://t.co/G0paRtst0n	Abbottabad: Federal Minister for Parliamentary Affairs and General Secretary Khyber Pakhtunkhwa Murtaza Javed Abbasi met the Muslim League workers from different places who came from his residence Abbottabad district on the occasion of Public Day and listened to their problems. https://t.co/G0paRtst0n	NIL	NIL	No_Hate
1568946083018964993	جنرل قمر جاوید باجوہ نے 29 نومبر 2016 کو پاک فوج کے 16ویں سربراہ کی ذمہ داری سنبھالی، جیسے جیسے وقت گزرتا گیا، دنیا باجوہ ڈاکٹرائن کی قائل ہوتی چلی گئی @OmniscientXo #WeSaluteCOASBajwa -*-*,, https://t.co/YBdpyEKwC6	General Qamar Javed Bajwa took over as the 16th Chief of the Pakistan Army on 29 November 2016. As time went by, the world became convinced of the Bajwa doctrine @OmniscientXo #WeSaluteCOASBajwa -*-*,, https://t.co /YBdpyEKwC6	NIL	NIL	No_Hate
1568541071612825601	آج اس تصویر نے پاکستان کے فتنے دشمنوں کو جلا دیا ہے پاکستان سے محبت کرنے والوں کے دل بھی جیت لئے ہیں وزیراعظم شہباز شریف صاحب اللہ آپ کو ہمیشہ خوش رکھے آمین ثم آمین❤ https://t.co/a12GedF6Ya	Today, this picture has burned the enemies of Pakistan The hearts of those who love Pakistan have also been won Prime Minister Shehbaz Sharif may God bless you always Amen and Amen ❤ https://t.co/a12GedF6Ya	NIL	NIL	No_Hate
1580883528883253248	انتظامیہ سو رہی ہے اور ایرانی تربیت یافتہ دہشت گرد کیسے سوشل میڈیا کا سہارا لے کر مولانا اعظم طارق کے قتل کا اعتراف کر رہا اور مولانا معاویہ اعظم کو دھمکیاں دے رہا ہے @MuftiAwaheed @moavia_official @Muhammad_Anas47 @AuranzaibFaroqi @alhaidri_gujrat @alhaidri_IBD @Difa_e_sahaba https://t.co/qDpcAHlrlq	The administration is sleeping and how an Iranian trained terrorist is using social media to confess to the murder of Maulana Azam Tariq and threaten Maulana Muawiya Azam. @MuftiAwaheed @moavia_official @Muhammad_Anas47 @AuranzaibFaroqi @alhaidri_gujrat @alhaidri_IBD @Difa_e_sahaba https://t.co/qDpcAHlrlq	‎61566٦6٦32... ۰0۹‏ ۸0۲1 لصفٌصٛەطذ 5۲۰۱۱ مومنین کے لیے آج خوشی منانے کا دن ہے ‏آج ہی کے دن گستاخ امام زمانہ محمد مہدی علیہ السلام ‏کا گستاخ ملعون ابن ملعون ‏اعظم طارق واصل جہنم ہوا تھا۔ ‏میری طرف سے ہر حلالی کو اس بات مبارک ‏اور انشاءاللہ دوسری خوشخبری بھی جلد ملے گی۔	6156666632... 009 Today is a day of rejoicing for believers On this very day, the insolent Imam of the time, Muhammad Mahdi (peace be upon him). peace The insolent of Maaloon Ibn Maaloon Azam Tariq Wasil went to hell. I congratulate every halali on this And God willing, the other good news will be received soon.	No_Hate
1573969236233519104	تھوک والے کنجر میراثی ۔۔ پورے پاکستان کو تھوک لگا کر وھی تھوک وھاں چاٹتے رھے۔۔بار بار۔ https://t.co/NIlotxnMAT	The wholesale conjurer is legacy. All over Pakistan They kept licking the saliva.. again and again. https://t.co/NIlotxnMAT	NIL	NIL	Hate
1559902953410273284	@WaseemRaja1512 یہ ٹکلا اس عمر میں بھی جھوٹ بولنے سے باز نہیں آتا سچ ہے کہ جہاں دلائل کام نہ آئیں وہاں دلے کام آتے ہیں اور حرامی اپنے نام کے ساتھ شریف لکھ کر بھی حرامی ہی رہتا ہے https://t.co/ZFaBTu8YR3	@WaseemRaja1512 This tikla doesn't stop lying even at this age It is true that where arguments do not work, hearts do And Harami is Harami even if he writes Sharif with his name https://t.co/ZFaBTu8YR3	NIL	NIL	Hate
1615530493780393984	کوٹلہ مغلان! ریاض حیدری گوپانگ،ریاض معاویہ خان گوپانگ،صدام راہی،شوکت خان لنڈ،ملک آصف منظور کھوکھر،احمد خان کاکڑ،عنایت خان کاکڑ،حاجی سجاد میرانی،فیاض خان جتوئی،صفدر خان گوندل،سید عباس خان،کاشف شاہ گیلانی نے میرے بھائیوں کی دعوت ولیمہ میں شرکت کی ہمراہ ملک ظفر عباس کھوکھر۔ https://t.co/VFmFqhOwZV	Kotla Mughlan! Riyaz Hydari Gopang, Riyaz Muawiya Khan Gopang, Saddam Rahi, Shaukat Khan Lund, Malik Asif Manzoor Khokhar, Ahmed Khan Kakar, Anayat Khan Kakar, Haji Sajjad Mirani, Fayaz Khan Jatoi, Safdar Khan Gondal, Syed Abbas Khan, Kashif Shah Geelani. Malik Zafar Abbas Khokhar along with participation in the invitation of the brothers. https://t.co/VFmFqhOwZV	NIL	NIL	No_Hate
1592910764834267139	ماحولیاتی تحقیقات کے لیے ریموٹ سینسنگ اور ڈیٹا ٹولز میں جانیے ایک ایسے ٹول کا جو 269,00 زمینی اور سمندری محفوظ علاقوں کا ڈیٹا دستیاب کرتا ہے، یا ماحولیاتی تنازعات کے ہاٹ سپاٹ کا کیٹلاگ یا پھر دنیا بھر میں گیس کے بھڑکنے کے نقشے۔ تحریر اردو میں موجود ہے https://t.co/MrtqgKmMBl https://t.co/oQCbuBiLT6	Among Remote Sensing and Data Tools for Environmental Investigations, a tool that provides data from 269,000 terrestrial and marine protected areas, or a catalog of environmental conflict hotspots or maps of gas flaring around the world. The writing is in Urdu https://t.co/MrtqgKmMBl https://t.co/oQCbuBiLT6	NIL	NIL	No_Hate
1578186523538870272	کنڈم بنانے والی فیکٹریوں سے گزارش ہے کہ اعلی کوالٹی کے کنڈم تیار کریں کیونکہ بعض دفع کنڈم پھٹنے کی وجہ سے اس طرح کی چیزیں وجود میں آتی ہیں😹 https://t.co/Aqc1oNPDHM	Condom manufacturing factories are requested to produce high quality condoms because sometimes such things occur due to the rupture of condoms 😹 https://t.co/Aqc1oNPDHM	NIL	NIL	Hate
1568511598133710848	جب نوازشریف کو مائنس کیا جارہا تھا تب عمران خان لڈیاں ڈال رہا تھا آج کپڑے پھاڑ پھاڑ کر کر بتا رہا ہے مجھے مائنس کیا جارہا ہے جیسا کرو گے ویسا بھرو گے۔ @Atifrauf79 #گھٹیا_فتنہ https://t.co/xJhidr5mKm	When Nawaz Sharif was being reduced, then Imran Khan was throwing lids. @Atifrauf79 #গতিযা_ত্নান https://t.co/xJhidr5mKm	لت قوم کو دھو؟ ست ا ا مل نہ یج .۴۳ ٣ے‏ ج ہے ۶۴٭ < 7 و	addiction Wash the nation? Sat a A mill No 43 3e c is 64* < 7 and	Hate
1593189917194354690	مدینے کی پاک سرزمیں پر ننگے پاؤں چلنے والے نوسر باز نے خانہ کعبہ کی تصویر والی گھڑی بیچ دی عمران نیازی بس کر اب تیرا کوئی جھوٹ نہیں چلنے والا https://t.co/7g7XUQAZ67	Nasr Baz, who walked barefoot on the holy land of Madinah, sold a watch with a picture of the Kaaba. Sit down Imran Niazi, now your lies will not work https://t.co/7g7XUQAZ67	NIL	NIL	Hate
1594191573293465601	#امریکہ کو #پاکستان کو مزید فوجی مدد فراہم کرنے میں محتاط، ہچکچاہٹ کا مظاہرہ کرنا چاہیے: رپورٹ https://t.co/TcmryeC3i6 @MilapNN #US #Pakistan https://t.co/be6JYaLCKT	#US should be cautious, reluctant to provide more military aid to #Pakistan: report https://t.co/TcmryeC3i6 @MilapNN #US #Pakistan https://t.co/be6JYaLCKT	NIL	NIL	No_Hate
1566632711149993984	میں بندوق اور گٹار🎸 دونوں چلانا جانتا ہوں طے تمہیں کرنا ہے کہ کون سی دھن پے ناچو گے .. https://t.co/8PwplqFV9O	I know how to play both a gun and a guitar🎸 You have to decide which tune you will dance to.. https://t.co/8PwplqFV9O	NIL	NIL	No_Hate
1593897349419765762	( تمغہ سیکس ) ایٹمی فوجی طاقت کے سپوت https://t.co/yhUBsLZmAu	(medal sex) Spawn of nuclear military power https://t.co/yhUBsLZmAu	NIL	NIL	Hate
1580153274212417536	ساہیوال ۔پاکپتن چوک میں معمولی لڑائی پر پولیس وردی میں ملبوس ملازم نے لڑکے کو فائرنگ کرکے قتل کر دیا ایس ایچ او نے موقع پر پہنچ کر تفشیش شروع کردی. @Sahiwalpoliceo1 @commissionerswl https://t.co/wKVacUEekg	Sahiwal - An employee dressed in police uniform shot and killed a boy due to a minor fight in Pakpattan Chowk. The SHO reached the spot and started investigation. @Sahiwalpoliceo1 @commissionerswl https://t.co/wKVacUEekg	NIL	NIL	No_Hate
1593177743465783296	ایسی باتیں کر کے یہ مکار شخص مظلوم بننے کی کوشش کر رہا ہے تاکہ کرپشن پر کسی کا دھیان نہ جا سکے https://t.co/ptX2GJXyXY	By saying such things, this insidious person is trying to be victimized so that no one can notice the corruption https://t.co/ptX2GJXyXY	پر ر7 میری جان کواب بھی خطرہ ہے, وہ لوگ دوبارہ مجھے ختم کرنے کی کوشش کرسکتے ہیں: چیئرمین پی ٹی ائی کا فرانسیسی نیوز چینل کوانٹرویو : 0 ۹ 3	But R7 My life is still in danger, they will kill me again Can try: Chairman PTI's French News Channel interview : 0 9 3	Hate
1598172461140676608	پیارے ابوجی ! جنرل باجوہ آپ اس دنیا سیاست میں نہیں رہے ورنہ یہ دیکھ کر خوش ہوتے کہ آپ کا نکا شفقت پدری سے محروم ہوتے ہی واکر کی مدد سے چلنا سیکھ رہا ہے۔ https://t.co/YKdGv8b9xs	Dear Abuji! General Bajwa, you have not been in politics in this world, otherwise you would have been happy to see your Nika Shafqat learning to walk with the help of a walker after losing his father. https://t.co/YKdGv8b9xs	NIL	NIL	Hate
1564949961837518849	الخدمت فاؤنڈیشن کے تحت سوات تحصیل مٹہ کے سیلاب سے متاثرہ 200 خاندانوں میں خشک راشن تقسیم کیا گیا۔ #AlkhidmatFloodRelief #FloodsInPakistan #donate #help #SWAT #emergency #food https://t.co/0pjjlzXY9F	Under Al-Khidmat Foundation, dry ration was distributed to 200 flood-affected families of Swat Tehsil Matta. #AlkhidmatFloodRelief #FloodsInPakistan #donate #help #SWAT #emergency #food https://t.co/0pjjlzXY9F	NIL	NIL	No_Hate
1564948673808711681	ظلم جب حد سے بڑھتا ہے تو مٹ جاتا ہے #حلیم_عادل_کو_رہاکرو https://t.co/fOtwJuYX4y	Cruelty becomes extinct when it exceeds the limit #Haleem_Adil_Ku_Hakhro https://t.co/fOtwJuYX4y	NIL	NIL	No_Hate
1580905005095145473	انسانیت کا نام و نشان تک نہیں اس انگلینڈ کے بنائے گئے ملک میں یہاں رہنا ہی اب سیفٹی نہیں جب انسان مچھروں کیطرح قتل کیا جاتا ھے اور قاتل کا نام و نشان تک معلوم نہیں ہوتا غذاب کا مستحق ھے یہ نظام یہ ملک افسوس🥹🖐#NashtarHospital https://t.co/OwWauJH9hr	Humanity does not even have a name or sign. It is not safe to stay here in this country created by England when people are killed like mosquitoes and the name and sign of the killer is not known. This system deserves food, this country is sorry 🥹🖐 #NashtarHospital https://t.co/OwWauJH9hr	NIL	NIL	Hate
1568944489665904640	ٹیکسلا کے علاقے میں ایک پٹھان ان بچیوں کو اغواء کر کے لیجا رہا تھا۔ پولیس نے گرفتار کر لیا ہے اب ان بچیوں کے ورثاء کی تلاش ہے۔جس کے پاس کوئی معلومات ہوں تھانہ ٹیکسلا سے رابطہ کریں۔ https://t.co/ED0sbRTLhA	A Pathan was abducting these girls in Taxila area. The police have arrested them, now they are looking for the heirs of these girls. Anyone who has any information should contact Taxila police station. https://t.co/ED0sbRTLhA	NIL	NIL	No_Hate
1592182815315349504	ان تمام کرداروں اور انکے مالکوں اور دلّالوں کیلئے ڈوب مرنے کا مقام ! پاکستانی قوم ہر لمحہ ان ذلیلوں پر لعنت ڈالتی ہے۔ https://t.co/72BMV5Av6a https://t.co/47bRb10eVn	The place of drowning for all these characters and their owners and brokers! The Pakistani nation curses these disgraced people every moment. https://t.co/72BMV5Av6a https://t.co/47bRb10eVn	2 78 ۰ جس ری ہ4 تد	2 78 0 Jas Re H4	Hate
1593844175941902337	@Naya__Pakistan_ یہ دہشتگردی ہے بدمعاشی ہے کسی پی ٹئ آئ والے کو اس کے حق میں نہیں بولنا چاہیے وہ ایک سیاستدان ہے اور بُٹ اسکے ماتحت ہیں کچھ بھی ہو جائے اس بُٹ کے پچھواڑے پر سگریٹ بجھانے چاہین اور سو چھتر صبح شام مارنے چاہیں https://t.co/AaaZymfy0L	@Naya__Pakistan_ This is terrorism, it is a hooliganism, no PTI member should speak in favor of him, he is a politician and the bots are under him. //t.co/AaaZymfy0L	اکر شہباز شری فکوکسی بٹ خر نے تحپڑبارا سے تو اس خجیٹ کو سو تھپزپڑنے چاہیں اسکی شدید الفاظ میں مزمت ہوی چا سے	Akar Shehbaz Shri Fukoxi Bat Khar Ne Thapparbara Se To Es Khajeet You want to slap yourself because of his harsh words	Hate
1594176180126502913	اختلافات اپنی جگہ ہم بطور سیاسی ورکر نشئی چور اور معذور مانی مینٹل کو تھپڑ مارنے کی شدید مذمت کرتے ہیں 👇 لیکن وچوں اسی وی خوش آں✌ https://t.co/YZeldZuNsI	Differences have their place As political workers, we strongly condemn the slapping of drug addicts and disabled money-mantels 👇 But in the meantime I am happy✌ https://t.co/YZeldZuNsI	NIL	NIL	Hate
1608447539967057921	کشیدہ کار ازل تجھ کو اگر اعتراض نہ ہو کہیں کہیں سے زندگی رفو کر لوں 🥀 https://t.co/YUugdWzUMW	If you don't mind, the tension is eternal Get the fuck out of somewhere 🥀 https://t.co/YUugdWzUMW	NIL	NIL	No_Hate
1581305131353587714	@AwAn_ZaDi_1 @Guddu_50 @OfficialDGISPR یہ سب خرامخور جوبائیڈن کے بیان پر نیوٹرل ہو گئے ہیں https://t.co/z4skWdaUmE	@AwAn_ZaDi_1 @Guddu_50 @OfficialDGISPR All of them are neutral on the statement of Khoramkhor Jobaidan https://t.co/z4skWdaUmE	اس پیم کے سا سن ےم ایک ہیں	We are one with this message	Hate
1563928478373888002	اس کی باتین پڑھوں نیشنل ٹی وی پر یہ بھیکاری اعظم کیا بولتا ہے. 22 23 کروڑ کی۔ترجمانی یہ ڈفر کرائم۔۔مسٹر کر رہا ہے ۔ اس کے منہ پر چپل بجانے کا دل کرتا ہے ۔ @OfficialDGISPR سررر تجربہ کرنا تھا تو شہکار ہی اچھا لے آتے۔۔ @CMShehbaz https://t.co/bTKheKddp2 https://t.co/PrIPCNRkcY	Read what this beggar Azam is saying on National TV. 22 23 crores. He wants to play slippers on his face. @OfficialDGISPR If you want to experiment, Shahkar is the best. @CMShehbaz https://t.co/bTKheKddp2 https://t.co/PrIPCNRkcY	طر 2000 ےروشم ریف 02003 و	Tar 2000 Jerusalem Ref 02003 and	Hate
1564936492262330368	@kibria10101 @MemonaMushtaq اللّہ کرے جلد اس نانی کی پکڑ ہو جھوٹی چورنی کی جس کی لندن تو کیا پاکستان مین بھی کوئی پراپرٹی نہیں مجرمہ نانی چورنی جھوٹے فراڈ ن #منحوس_حکومت https://t.co/ViizpwTbhR	@kibria10101 @MemonaMushtaq may Allah catch this granny soon of the false Chorni Who does not have any property in Pakistan even in London Criminal nani chorni false fraud n #विजुस_गुवाद https://t.co/ViizpwTbhR	NIL	NIL	Hate
1587062275944357889	ہم پاکستانی قوم #DGISI اور #DGISPR کے تہ دل سے شکر گزار ہیں کہ آپ نے بروقت قوم کو فتنہ خان نیازی کا اصل مکروہ گھٹیا فتنہ انگیز منافقت اور منافرت سے بھرپور قبیح چہرہ عوام کےسامنے لاکر احسان فرمایا شکریہ @MaryamNSharif @Atifrauf79 #NationThanksDGISI @Shamylaroy https://t.co/GuLZK7IKMM	We are the people of Pakistan #DGISI And #DGISPR I am grateful from the bottom of my heart that you showed favor to the nation by timely bringing the real abomination of Fitna Khan Niazi to the people, full of hatred, hypocrisy and hatred. @MaryamNSharif @Atifrauf79 #NationThanksDGISI @Shamylaroy https://t.co/GuLZK7IKMM	ر7 .۰٭-ت-.ت٣۳‏ یی لا پا سے فو نے نے قوم پر اصا مسا ے گحران نیازی کا واےر مقر ایر ا رکا کے یں جا وہ	R7.0*-T-.T33 Yes From La Pa, Fu has imposed on the nation The residence of Gahran Niazi was in Araka Go there	Hate
1565760709434253315	سابق وزیر اعظم اور چیئرمین پاکستان تحریک انصاف (پی ٹی آئی) عمران خان نے کہا کہ ملک میں جب ڈیزل مہنگا ہوتا ہے تو ہر چیز مہنگی ہو جاتی ہے۔ تفصیلات:https://t.co/bywdezzqwi https://t.co/8C5tacTurL	Former Prime Minister and Chairman Pakistan Tehreek-e-Insaf (PTI) Imran Khan said that when diesel is expensive in the country, everything becomes expensive. Details: https://t.co/bywdezzqwi https://t.co/8C5tacTurL	۱ ہماری حکومت ختم کی گئی تو پیٹرول 100 روپے لیٹر سس تھاء عمران خان کا دعویٰ	1. If our government was abolished, petrol Rs 100 per litre Imran Khan's claim	No_Hate
1565278524650401794	@MAzeem_1113 @bukm_pp70 @rashid_kh12 @OsamaTayyab @Fareed66A @MAbdullahGul @TurkeyUrdu @TLPOffice63 @MuhammadTahaCh1 @dukhtareislam @_jani6923 اسلام کی ضرورت پوری انسانیت کو ہے۔ ہر ایک مظلوم کو، چاہے وہ دنیا کے کسی بھی خطے میں رہتا ہو کوئی بھی مذہب کا ہو۔۔۔ اسے اسلام ہی ظلم سے نجات دلا سکتا ہے ۔۔ اسلام ہی اسے تاریکیوں سے ایمان کی روشنی تک لائے گا۔ سسکتی ہوئی انسانیت منتظر ہے اسلام کے بہادر شیروں …	@MAzeem_1113 @bukm_pp70 @rashid_kh12 @OsamaTayyab @Fareed66A @MAbdullahGul @TurkeyUrdu @TLPOffice63 @MuhammadTahaCh1 @dukhtareislam @_jani6923 Islam is needed by all humanity. To every oppressor, no matter where he lives in any region of the world, no matter what religion he belongs to. Only Islam can save him from oppression. Islam will bring him from darkness to the light of faith. Sobbing huma…	NIL	NIL	No_Hate
1598937779169243137	خیبر ایجنسی میں ایف سی چوکی پر حملہ تحصیل باڑہ کے علاقے عزیز خیل میں ایف سی کی چوکی پر مجاہدین نے گرنیڈ اور لیزری گن سے حملہ کرکے 6 ایف سی اہلکاروں کو ہلاک اور زخمی https://t.co/lY2hpeqaZx	Attack on FC outpost in Khyber Agency Mujahideen attacked FC outpost in Aziz Khel area of ​​Tehsil Bara with grenades and laser guns, killing and injuring 6 FC personnel https://t.co/lY2hpeqaZx	NIL	NIL	No_Hate
1564602615530496000	حلیم عادل شیخ کا قصور صرف یہ ہے کہ وہ سندھ کی عوام کی بات کرتا ہے انکا مقدمہ لڑتا ہے ٫ انکے ہر ایک غم و خوشی میں انکے ساتھ ہوتا ہے ٫ ان پر ہونے والے ظلم کے خلاف ڈٹ کر کھڑا ہوتا ہے ٫ اور سندھ میں وڈیرہ نظام زرداری نظام کے خلاف ڈٹ کر کھڑے ہونے پر انکے خلاف جھوٹے مقدمات بنائے https://t.co/btPiJb5gqa	Haleem Adil Shaikh's fault is only that he talks about the people of Sindh, fights their case, is with them in every sorrow and joy, stands firm against the oppression of them, and in Sindh. Wadira Nizam made false cases against Zardari for standing against Nizam https://t.co/btPiJb5gqa	NIL	NIL	Hate
1562998201325535233	@Vslm75102481 @J_SaqibNisar اوریجنل حرامی۔۔۔یہودی کتا https://t.co/aDSA82XEMd	@Vslm75102481 @J_SaqibNisar Original Harami..Jew dog https://t.co/aDSA82XEMd	NIL	NIL	Hate
1578058478098292739	پاکستان کی نمائندگی کرنے والے چار افراد کے نام بتائیں اور موڈیز کی کریڈٹ ریٹنگ کو ڈاؤن گریڈ یعنی منفی کرنے کی وجوہات پائیں جب بلاول اور چیری بلاسم جیسے امریکہ جاکر بڑھ بڑھ کر کہیں گے کہ سیلاب سے تباہ ہوگئے مارے گئے مدد کرو تو غلاموں ایسی ہی مدد ملتی ہےکہ کریڈٹ ریٹنگ ہی منفی ہوگئی https://t.co/YSexhKhNtE	Name four persons who represent Pakistan and find reasons for downgrading Moody's credit rating When people like Bilawal and Cherry Blossom go to America and say more and more that they are destroyed by floods, help them, then the slaves get such help that the credit rating becomes negative https://t.co/YSexhKhNtE	۰ے ٤ڑھ0‏ ٭ پا 0 -- ‎٦‏ خ	0 4 and a half * pa 0 -- 6 Kh	Hate
1598975131975843840	ڈرامہ باز سپریم کورٹ کے چیف جسٹس سے عوام کی اپیل ہےکہ،اعظم سواتی اور عام عوام کو انصاف دیں ورنہ چکلے کی عدالتیں بند کریں۔ عوام کے ٹیکس پر پلنے والے ادارروں نے ہی عوام کو یرغمال بنایا ہوا ہے۔ https://t.co/DA4m1oZMX2	The people appeal to the Chief Justice of the Supreme Court to give justice to Azam Swati and the common people, otherwise close the courts of Chiklay. The people are held hostage by the institutions that are built on the people's taxes. https://t.co/DA4m1oZMX2	NIL	NIL	Hate
1565504889379225601	جسکے فالوورز زیادہ یاجیب میں حرام زیادہ عدل وانصاف اسی کی رکھیل بنی ہوئی ہے نوٹ ویکھاو اور موڈ بناو۔ مطلب جتنامال دوگے اتنی ہی شلوار نیچے۔۔۔ مہاجروں کیلئے کچھ بھی نہیں،اگر اپنے بچے زندہ دیکھناچاہو تو گراونڈ پر آنا ہوگا۔ ورنہ فلموں کی طرح تماشا دیکھو اور سوجاو #ReleaseNisarPanhwar https://t.co/5RT1eppMJz	Whose followers are more Yajib, Haram, more justice and justice are kept for him, take note and make a mood. Meaning, the more money you give, the more you wear. Nothing for the refugees, if you want to see your children alive, you have to come to the ground. Otherwise watch tamasha like movies and enjoy #ReleaseNisarPanhwar https://t.co/5RT1eppMJz	NIL	NIL	Hate
1594762668044337175	کابل: رئيس الوزراء کے معاون سیاسی مولوی عبدالکبیر کی ہزارہ قبیلے کے معتبرین سے ملاقات https://t.co/UbcCXIhrwV https://t.co/IIYXME0MQs	KABUL: Political Assistant to the Prime Minister Maulvi Abdul Kabir met with Hazara tribe officials https://t.co/UbcCXIhrwV https://t.co/IIYXME0MQs	NIL	NIL	No_Hate
1617154554713477122	کون کہتا ہے ۔۔ "کتوں" کی دوستی "سوروں" کے ساتھ نہین ہو سکتی۔ یہ تو میرا ذاتی مشاہدہ ہے۔ 👇👇👇👇👇👇👇👇 (موٹی واشل سپیکر- قاسم علی شاہ) https://t.co/Q7wjNnZV28	Who says "dogs" friendship of "pigs" Can't be with This is my personal observation. 👇👇👇👇👇👇👇👇 (Motiwashel Speaker- Qasim Ali Shah) https://t.co/Q7wjNnZV28	NIL	NIL	Hate
1578974841151311872	تمام اہل اسلام کو دل کی گہرائیوں سے بارہ ربیع الاول بہت بہت مبارک ہو۔اللہ پاک اپنے حبیبﷺ کے صدقے سے تمام مسلمانوں کی تمام پریشانیاں دور فرماۓ اور ہر مسلمان کی دلی مراد پوری کرے۔امین ثم امین یا رب العالمین @TeamSP__ #رحمت_اللعالمین_ہمارے_نبیﷺ https://t.co/juUHC668XG	Happy 12th Rabi'ul Awwal to all Muslims from the bottom of my heart. May Allah remove all the worries of all Muslims with the charity of his beloved Prophet (peace be upon him) and fulfill the heart desires of every Muslim. @TeamSP__ #رحمت_اللعلامين_حمار_نبي_صلى الله عليه و سلم https://t.co/juUHC668XG	NIL	NIL	No_Hate
1593483668747689984	یہ بھڑوا ہی رہے گا https://t.co/wdt5qz3MPN https://t.co/l7Av0IJd0h	It's gonna be crazy https://t.co/wdt5qz3MPN https://t.co/l7Av0IJd0h	NIL	NIL	Hate
1561212400510148609	"بندوق والی مخلوق مذاکرات اور معاہدے کے بغیر قبائل میں واپس کیسے آگئی"۔مولانا فضل الرحمان نے بھی مالاکنڈ میں طالبان کی موجودگی پر سوالات اٹھادئیے #molanafazlurrahman #Taliban https://t.co/NwDWEfhqxf	"How the creatures with guns returned to the tribes without negotiation and agreement". Maulana Fazlur Rahman also raised questions on the presence of Taliban in Malakand. #molanafazlurrahman #Taliban https://t.co/NwDWEfhqxf	NIL	NIL	No_Hate
1596110577952522240	۔۔۔۔۔۔۔۔۔کمال کیا ہے؟؟۔۔۔۔۔۔۔۔۔۔ خزاں کی رُت میں گُلاب لہجہ بنا کے رکھنا ۔ ۔ ۔ ۔۔۔۔۔۔ کمال یہ ہے ہوا کی زد پہ دِیا جلانا جَلا کے رکھنا ۔ ۔ ۔ ۔ ۔ ۔ ۔ کمال یہ ہے ذرا سی لغزش پہ توڑ دیتے ہیں سب تعلق زمانے والے سو ایسے ویسوں سے بھی تعلق بنا کے رکھنا ۔ ۔ ۔ ۔ ۔ ۔ ۔ ۔ https://t.co/gzIQcFEmXT	What is perfection? A rose tone in autumn blood Make up. . . . This is the wonder Lighting a lamp in the wind Keep burning. . . . . . . This is the wonder They break on a slight slip All are relative So also related to such people Make up. . . . . . . . https://t.co/gzIQcFEmXT	NIL	NIL	No_Hate
1563514838730833921	پورا بلوچستان سیلاب کی رذ میں آیا دس سے زیادہ اضلاﻉ پانی میں ڈوب گے آدھا سندھ پانی میں ڈوبا ہوا تھا کسی میڈیا والے نے بلوچ سرداروں کو سندھ حکومت یہ فیڈرل حکومت کو نہیں جھنجھوڑا آپ لوگ کیا کر رہے ہیں کہاں ہیں اپکے ريسكيو کے ادارے اس کی بجاے سارا میڈیا عمران خان کے خلاف ؟؟؟ https://t.co/cODBfZpVN0	The entire Balochistan was flooded More than ten districts will be submerged in water Half of Sindh was submerged in water Someone from the media has scolded the Baloch chiefs, Sindh government, not the federal government. What are you doing? Where are your rescue agencies? Instead, the entire media Against Imran Khan??? https://t.co/cODBfZpVN0	NIL	NIL	No_Hate
1608852759557844992	ان شاء اللہ ایک دفع پھر وزیر اعظم https://t.co/oqPMKXffJb https://t.co/eZrCYWSlgq	God willing, once again Prime Minister https://t.co/oqPMKXffJb https://t.co/eZrCYWSlgq	NIL	NIL	No_Hate
1568511199888969734	راولپنڈی: قائد ملت جعفریہ پاکستان علامہ سید ساجد علی نقوی سے حالیہ کے ٹو سر کرنے والے کوہ پیما واجداللہ نگری کی ملاقات، واجد اللہ نگری نے دوسری بلند ترین پہاڑ کے ٹو پر لہرانے والے اسلامی تحریک کا جھنڈا قائد محترم کو پیش کیا. https://t.co/Fl0pisym3K	Rawalpindi: The meeting of Quaid Millat Jafaria Pakistan Allama Syed Sajid Ali Naqvi, the recent mountaineer Wajdullah Nagri, Wajidullah Nagri presented the flag of the Islamic movement hoisted on top of the second highest mountain to the leader. https://t.co/Fl0pisym3K	ظا مات تمفریہ پاکنتا نآیت ال مید ماج دن نتوئی سے 2ا کو م رن دال یکو ہ پپیاداجبر ایگ کا کی ملا جات داجدالاشگ کیا نے دوسری انت ین پاڑ کٹ بداہرانے دانے اس لاٹ یت ری ک کا جمڈر اق ئ رشح موی لکیا. 7۸۴۴۸۱۸ ۳۸٤۶۶ ۲۷ 60600 ۸۹ ۰۱۷۸۷۷۸۸۸۸. 04	Zamat Tamfriya Pakanta Nayat al-Mead Maj Din Natui to 2a to m Ran dal yukhu papiyadajabr eg ka ki malajat dajdalashg kia ne other In the last part of the day, he wrote the letter of this lottery. 7844818 38466 27 60600 89 0178778888. 04	No_Hate
1565642986234544128	@SdqJaan اطہر کنجر کے کہنے پر کھول دیا وہ تو جج نہیں بھڑوا ھے جو اپنی بیوی بیٹی عمران خان کے گھر میں صبح چھوڑ کر پھر عدالت جاتا ھے بہن چود جج نہیں بھڑوے کی نوکری کرنی چاہے تھی اس مادرچود کو اس کو کتوں والا پٹہ ڈال کر ڈی چوک کر مجرہ کروائے بندہ https://t.co/ZFTilztMgw	@SdqJaan opened it at the request of Athar Kanjar, he is not a judge who leaves his wife and daughter at Imran Khan's house in the morning and then goes to court. Do it, do it, do it, man, https://t.co/ZFTilztMgw	NIL	NIL	Hate
1566746625351057408	جِس نے لوگوں کو پنجابی، سندھی، بلوچی، پٹھان کی لڑائی سےنِکال کر”پاکستانیو“ کہا، اور پوری قوم کومتحد کیا جِو اِس مُلک کے غریب کی آواز بنا دُنیا میں کشمیر کا سفیر بنا جِس نےسوئی ہوئی قوم کو جگایا، اُن کو اُنکا حق بتایا عمران خان پاکستان کی دھڑکن بن چُکاہے♥️ 4/4 #ImranKhan https://t.co/jBKHcis6nM	Who called the people "Pakistan" by removing them from the fight of Punjabi, Sindhi, Balochi, Pathan, and united the entire nation. Who became the voice of the poor of this country Became an ambassador of Kashmir to the world Who awakened the sleeping nation, told them their right Imran Khan has become the heartbeat of Pakistan 4/4 #ImranKhan https://t.co/jBKHcis6nM	NIL	NIL	No_Hate
1577432015292534784	لاطینی امریکی ملک ایکواڈور کی جیل میں دنگے بھڑک اٹھے، 15 ہلاک، 20 زخمی https://t.co/YgxyDG8T2H https://t.co/0gMqA46YMW	A riot broke out in the prison of the Latin American country of Ecuador, 15 were killed, 20 were injured https://t.co/YgxyDG8T2H https://t.co/0gMqA46YMW	NIL	NIL	No_Hate
1606595761642344449	منشیات ایک زہر ہے جو کہ آ ج کل اسکول کالیجز میں بہت زیادہ استعمال ہو رہا ہے جسے روکنا ہماری زمہ داری ہے #Drugs_Are_Death https://t.co/UT7hg0vOtT	Drugs are a poison that is being widely used in today's schools and colleges which it is our responsibility to stop #Drugs_Are_Death https://t.co/UT7hg0vOtT	8۸۷ ۱۱6 16 065 5 نا08 ۲0 ۷۱ خبزدار ! خخیاتآ پک ہنتا بتاگراجاڑ ول بن اپے پچ ںکواس انت ے یا	887 116 16 065 5 Na08 20 71 Baker! Khakhyataa pak hanta battagrajad Will bin ape pach nkwas ante ya	No_Hate
1577197360706646016	@FarooquiJameel 100 فیصد ٹھیک ہی تو کہا ہے مولانا صاحب نے۔ بلکہ تیرے بارے میں کہنا چاہیے تھا کہ ان کے چوتڑ ان کے گالوں سے بھی زیادہ نرم ہیں۔ 😂 https://t.co/nXuOfmcxxW	@FarooquiJameel 100% right, Maulana Sahib has said it. Rather, it should have been said about you that their cheeks are even softer than their cheeks. 😂 https://t.co/nXuOfmcxxW	NIL	NIL	Hate
1593857825335287808	ٹائم لائن سکرول کی تو چند دوست پاکستان کے سیاسی، سماجی اور معاشرتی حالات پر پریشان نظر آئے۔ مجھے ان کی مایوسی کو دیکھ کر بہت دکھ ہوا۔ میں انہیں اور باقی تمام کو کہنا چاہتا ہوں کہ پاک فوج پر یقین رکھیں۔ ہماری افواج میں بےپناہ صلاحیت ہے کہ وہ سب ٹھیک کر لے گی۔ 1/3 https://t.co/VpjN2nWMsW	As the timeline scrolled, a few friends seemed worried about the political, social and social conditions of Pakistan. I was very sad to see their disappointment. I want to tell them and everyone else to have faith in Pakistan Army. Our forces have the unstoppable ability to fix everything. 1/3 https://t.co/VpjN2nWMsW	NIL	NIL	No_Hate
1564949472509149186	@Ali24419822 @Zubair1277 @_Haya65 اس کتے کے حواری کتے بس بھونکنے کے علاؤہ کوئی کام نئی کر دہے https://t.co/Uf5E42MXjB	@Ali24419822 @Zubair1277 @_Haya65 This dog's companion dog should do something other than bark https://t.co/Uf5E42MXjB	‎۷٥"‏ ۷۸۷۰م 50۰۲ ٹ8 ا ‏0_۶۱4 آك عمران ٹائیگرز کسی کو نظر آۓ تو انہیں بلوچستان جانے والی گاڑیوں پر بھٹائیں۔ حقیقی آزادی گھر بیٹھ کر تماشا دیکھنے سے نہیں ملتی اور نہ ہی بڑے جلسے کرنے سے ملے گئ۔ عوام ڈوب رہی ہے اور یہ لوگ تخت گکیلئے چہاذ کی تیاری کر رہے ہیں افسوس ‏سعدرضوی _سیلاب_زدگان _ کے ساتھ ‎۲1305186 ۲۴	75" 7870m 5002t8 a 0_614 Ok Imran Tigers if anyone sees them Bhat on vehicles going to Balochistan. The real freedom is to sit at home and watch the spectacle It does not meet or hold large gatherings Met with The public is drowning and these people Preparations are being made for the throne sorry Saad Rizvi with _Selab_Zadagan_ 21305186 24	Hate
1580124317681319936	میڈیا کی آزادی کے بہت چرچے ہوتے رہتے ہیں اور پھر اب تو کچھ اسکینڈلو ں کی غلاظت بھی سامنے آ گئی ہے۔ @LiaqatH03803877 @Lashari_4 @SobiaHafeez12 @Umair61416406 @umir_b #صحافت_نہیں_ذلالت_هے https://t.co/IaL9SPKtgc	There is a lot of talk about freedom of the media and now some scandals have come to the fore. @LiaqatH03803877 @Lashari_4 @SobiaHafeez12 @Umair61416406 @umir_b #صحافت_نهي_ذلالت_هي https://t.co/IaL9SPKtgc	کستاان کے خدارو ں کاپ کگروہ 0-0 0 4 کہوے ۱ 1 ۱	Kistan's Gods Kaap Kagroh 0-0 0 4 say 1 1 1	Hate
1587755747949117447	نہ رھی گور سکندر نہ قبر دارا مٹے نامیوں کے نشاں کیسے کیسے 👇👇 https://t.co/g78Lsp4BDj	There was neither Gour Sikandar nor Dara's grave How to find the signs of mutt names 👇👇 https://t.co/g78Lsp4BDj	NIL	NIL	No_Hate
1561278553315954688	@Marriyum_A جھوٹی حکومت کی جھوٹی مکار چور نوکرانی ڈڈو چارجر https://t.co/1NmazxouBN	@Marriyum_A lying deceitful thieving maid of a false government Dudo Charger https://t.co/1NmazxouBN	۱ ,[2138 ٤ا‏ ط۸23 <3 3۴ط کا ‎650٥-۸‏ ‏راع تک اعتا	1, [2138 4a 1823 <3 34i 6505-8 Adherence to Ra'a	Hate
1608950388451082241	میں خود چاہتی ہو حالات ہوں خراب میرے خلاف زہر اُگلتا پھرے کوئی 😅 #Tabi https://t.co/FZh6KJMTu6	I want you to be in a bad situation Someone is spewing poison against me 😅 #Tabi https://t.co/FZh6KJMTu6	NIL	NIL	No_Hate
1564597112456847360	میں نےپوچھاتھاکہ اخلاص کسےکہتےہیں ایک بچہ تری تصویر اٹھا لایا تھا #عمران_خان_ٹیلی_تھون_مہم #TelethonByImranKhan https://t.co/xF2aTmH7nA	I asked what is called sincerity A child had brought three pictures #Imran_Khan_Telethon_Campaign #TelethonByImranKhan https://t.co/xF2aTmH7nA	NIL	NIL	No_Hate
1568132187706335232	مولانا طارق جمیل صاحب کے لئے کوئی ایک جملہ https://t.co/O8snVq64jy	A sentence for Maulana Tariq Jameel Sahib https://t.co/O8snVq64jy	NIL	NIL	No_Hate
1608806470115811330	@QasimalirazaAli استغفرُللہ انسان کے سامنے جھکنا حرام ہے شرک ہے گناہ کبیرہ ہے https://t.co/gCzc1vHebX	@QasimalirazaAli Astaghfirullah, bowing down to a human being is forbidden, polytheism is a great sin https://t.co/gCzc1vHebX	NIL	NIL	No_Hate
1581936779459903490	چیا سیڈز یا’’تخم بالنگو‘‘، شوگر کے مریضوں کے لئے ایک نعمت https://t.co/zUqW3RXuWI https://t.co/BwvtsKVVSO	Chia Seeds or "Balingo Seeds", a boon for diabetics https://t.co/zUqW3RXuWI https://t.co/BwvtsKVVSO	NIL	NIL	No_Hate
1568672582097928192	*میں صدق دل سے اقرار کرتی ہوں اور یقینی حلف اٹھاتا ھوں کہ حضرت محمد مصطفی صلی اللہ علیہ وسلم خاتم النبین ہیں اور اللہ تعالی کے آخری نبی اور رسول ھیں اب قیامت تک کوئی نیا نبی نہیں آئے گا۔* *اور جو کوئی بھی نبوت کا دعوی کرے گا وہ کافر، زندیق، مرتد ہوگا۔* #فتنہ_عمرانیہ_قادیانیہ https://t.co/qnzTKtKwxf	*I sincerely confess and take a definite oath that Hazrat Muhammad Mustafa (peace be upon him) is Khatam-ul-Nabib and the last prophet and messenger of Allah Almighty, and no new prophet will come until the Day of Resurrection.* *And whoever claims prophethood will be a disbeliever, a heretic, an apostate.* #Fitnah_Umraniyah_Qadiyania https://t.co/qnzTKtKwxf	) پا< گم	) Foot	No_Hate
1614231271881711618	سرسوں کا ساگ، مکئی کی روٹی اور لہسن کی چٹنی 🤤 https://t.co/jXkARj9TTh	Mustard greens, cornbread and garlic sauce 🤤 https://t.co/jXkARj9TTh	NIL	NIL	No_Hate
1565687978445475840	@realafghan007 یہ نشانی ھوتی ھے کنجروں کی ایسی تصویریں لگانے سے کیا ظاھر کرتے ھو کہ ھمارے پاس بہت کچھ ھے بس پیسے لاو سب کچھ ملے گا بھڑوے کنجر کی اولاد https://t.co/fXzXxmMFoy	@realafghan007 This is a sign, what do you mean by posting pictures of kangars that we have a lot, just bring money, everything will be given to you, son of a kangar https://t.co/fXzXxmMFoy	NIL	NIL	Hate
1572556267125899265	📷صیہونی حکومت کے لئے سعودی حکمرانوں کے اقدامات، امام سید علی خامنہ ای دامت برکاتہ|1 اگست 2016 #israeel #saudia #America #UmmateIslami #ashabeimam 📱https://t.co/p4J0qzcrn9 📱https://t.co/ihhvi8HTT6 📱https://t.co/d78LvidVWn 📷https://t.co/af9cimBkBo 🪀https://t.co/JtPnOwrB9Y https://t.co/P72himaJX3	📷 The actions of the Saudi rulers for the Zionist government, Imam Seyyed Ali Khamenei Damat Barakat | August 1, 2016 #israeel #saudia #America #UmmateIslami #ashabeimam 📱https://t.co/p4J0qzcrn9 📱https://t.co/ihhvi8HTT6 📱https://t.co/d78LvidVWn 📷https://t.co/af9cimBkBo 🪀https://t.co/JtPnOwrB9Y https://t.co/P72himaJX3	صہہوی علومت کےسا تح سود میں کے شکارتحاظات اورروا یا ضیقت میں ای ٹر ہے جو پشت سے امت اسلا می پرکھو نا اگیاے انہوں نے بہت بڑکی خنیاخت اورفراریکیا سے بیلو کگنا وکا را بین ان تعلقات بھی ام بی باتحملوث ے۔	Sahavi Ulamat's interest in the interests of the victims and hardships I am eter who did not get the ummat islami parkho from the back Belo kagana vika rabin in from very big khanikhat and frarikiya Relationships are also ambivalent.	Hate
1566715273612333056	پیٹرول ڈیزل کے بعد عالمی مارکیٹ میں کوکنگ آئل کی قیمت میں بھی 33% کمی آئی ہے لیکن اس امپورٹڈ منحوس حکومت نے قسم اٹھائی ہوئی ہے عوام کو کوئی ریلیف نہیں دینا ایسا لگ رہا ہے کسی دشمن ملک کا قبضہ ہوچکا ہے پاکستان پر اور وہ عوام سے بدلہ لے رہا ہے https://t.co/s4UsqGhT5W	After petrol diesel, the price of cooking oil in the world market has also decreased by 33%, but this import scandalous government has sworn not to give any relief to the people. It seems that an enemy country has occupied Pakistan and is taking revenge on the people https://t.co/s4UsqGhT5W	: ]۰2 ...95 9 اردو ‎(۸٥۷۳.95‏ 8860 عالمی مارکیٹ میں خوردنی تیل کی قیمتوں میں ریکارڈ کمی مگر پاکستانیوں کے تیل اور گھی کا خرچہ کیوں کم نہ ہو سکا؟ ‎(٥‏ ھا 9ی-. 02-2 -- 1	: ]02 ...95 9 Urdu (8573.95) 8860 of edible oil in the global market But the record reduction in prices Oil and ghee expenditure of Pakistanis Why couldn't it be reduced? (5 Yes 9y-. 02-2 -- 1	Hate
1565266553276440577	#کنجروں_کاٹولہ_لفافہ_صحافی #MaryamNawaz #عمران_خان_ٹیلی_تھون_مہم #وہ_کون_تھا #FloodReliefFund2022 #FloodsInPakistan2022 #NawazSharif شریف خاندان دنیا کے پانچ بڑے امیر مافیا میں ایک ہیں، جس قوم کو ساری عمر لوٹا جب ان کو ان کی امداد کی ضرورت پڑی تویہ امداد دی گئی. یا الله https://t.co/UqUeqZy4cK	#Kanjarun_katolah_journalist_envelopment #MaryamNawaz #Umran_Khan_tele_thon_campaign #who_was_that #FloodReliefFund2022 #FloodsInPakistan2022 #NawazSharif The Sharif family is one of the five big rich mafias in the world, who robbed the nation all their lives when they needed their help, then this help was given. Ya Allah https://t.co/UqUeqZy4cK	NIL	NIL	Hate
1578720317270552576	پاکستان نے دہشت گردی کے خلاف جنگ میں معصوم شہریوں کی جانوں کا نذرانہ پیش کیا ہے۔ اس نے ہزاروں افغان مہاجرین کو پناہ بھی دی ہے اور دشمن عناصر کو ختم کرنے کی کوشش کی ہے۔ پاکستان نے بے گناہ شہریوں کی جانیں گنوائیں اور جنگ کے اختتام پر ملکی https://t.co/JwHuCdoong	Pakistan has sacrificed the lives of innocent citizens in the war against terrorism. It has also sheltered thousands of Afghan refugees and tried to eliminate hostile elements. Pakistan lost the lives of innocent civilians and at the end of the war the country https://t.co/JwHuCdoong	NIL	NIL	No_Hate
1593862120986255360	غلط بات ہے۔ شوز بھی پالش کرتا ہے پھر بھی تھپڑ مار دیا شوباز کو #تھپڑ_شریف https://t.co/Jy2XIHeeuY	It is wrong. Shows also polishes yet slapped Shobaaz #Slap_Sharif https://t.co/Jy2XIHeeuY	NIL	NIL	Hate
1578753126546694144	@Your_Mantor @MansurQr @Rajpoot_PML_N سعید رانا بوعنڈا ولد بشیرا ماچھی چوپا۔ سالا سارے گوجرانوالے دا۔ @Rajpoot_PML_N 😂😂 https://t.co/hZXpBGIPID	@Your_Mantor @MansurQr @Rajpoot_PML_N Saeed Rana Buanda son of Bashira Machhi Chopa. All Gujranwale Da. @Rajpoot_PML_N 😂😂 https://t.co/hZXpBGIPID	5 میرا نام رانا سعید ولد بشیرا ماچھی ہے اور ‎٠ 71 ۰ 71‏ : ×ط میں گوجرانوالے کی گرم ترین رنڈی کا ٭ٴط گاج مق	5 My name is Rana Saeed son of Bashira Machhi and 0 71 0 71 : ×i I of the hottest rundi of Gujranwale * Gaj Moq	Hate
1563403264116211713	کریلا بیل نما پودا جس پر کھردار پھل لگتا.عام طور پر کریلا کہا جاتا۔ ذائقہ کڑوا،یہ ایک سبزی کے طور پر استعمال کیا جاتا۔اس سے کچھ دیسی ادویات بھی بنائی جاتی ہیں۔اچار بھی ڈالا جاتا.خشک کر کے لمبے عرصے کے لئے استعمال کیا جا سکتا.ذائقہ سے کڑواہٹ کم کرنے کے لئے اس کو نمک لگایا جاتا ہے۔ https://t.co/kg9fbE7qEt	Karela A vine-like plant with scaly fruit. Commonly called bitter gourd. Bitter in taste, it is used as a vegetable. Some indigenous medicines are also made from it. Also pickled. Can be dried and used for a long time. is applied. https://t.co/kg9fbE7qEt	NIL	NIL	No_Hate
1579495476021579777	دلِ برباد کو برباد کہاں تک رکھتے جانے والے تجھے ہم یاد کہاں تک رکھتے اب تیرے ہجر کی باتیں نہیں سنتا کوئی ہم لبوں پہ تیری روداد کہاں تک رلھتے بڑی مشکل سے نکالا ہے تیری یادوں کو اپنے گھر میں انہیں آباد کہاں تک رکھتے کار دشوار تھی دوبارہ محبت لیکن خود کو بیکار تیرے بعد کہاں تک رکھتے https://t.co/aF8DsZAl8e	How long can you keep a broken heart? How long will we remember you? Now no one listens to your hijr How far we will keep your praise on our lips I have extracted your memories with great difficulty How long will you keep them in your house? But it was difficult to love again How long will I keep myself useless after you https://t.co/aF8DsZAl8e	NIL	NIL	No_Hate
1560070608603471878	Faiz was a whole mood when he said تجھ کو دیکھا تو سیر چشم ہوئے تجھ کو چاہا تو اور چاہ نہ کی تیرے دستِ ستم کا عجز نہیں دل ہی کافر تھا جس نے آہ نہ کی https://t.co/mP0agNnft0	Faiz was in a whole mood when he said When I saw you, my eyes widened I wanted you and I didn't want you Your hand is not helpless The heart was a disbeliever who did not sigh https://t.co/mP0agNnft0	NIL	NIL	No_Hate
1558470206254682112	ملی نہیں ہے ہمیں ارض پاک تحفے میں 🇵🇰 جولاکھوں دیپ بجھے ہےتویہ چراغ جلا💚 https://t.co/Zbe0hBkok4	We have not received a pure land as a gift 🇵🇰 If thousands of lamps are extinguished, then this lamp will be lit 💚 https://t.co/Zbe0hBkok4	NIL	NIL	No_Hate
1616004837111484416	پشتون تحفظ مومنٹ شمالی وزیرستان کے کوآرڈینیٹر کو بنوں پولیس نے گرفتار کیا، عید رحمان وزیر کو انسداد دہشت گردی کی عدالت نے بی بی اے کرمنل کورٹ کے کمرہ عدالت سے گرفتار کیا، ان کی گرفتاری انتہائی قابل مذمت ہے اور ہم ان کی فوری رہائی کا مطالبہ کرتے ہیں #ReleaseEidRehmanWazir https://t.co/uyNxx7IRCd	Coordinator of Pashtun Protection Moment North Waziristan was arrested by Bannu Police, Eid Rehman Wazir was arrested by Anti-Terrorism Court from the court room of BBA Criminal Court, his arrest is highly condemnable and we demand his immediate release. Demand #ReleaseEidRehmanWazir https://t.co/uyNxx7IRCd	NIL	NIL	No_Hate
1581536526978420738	ٹی 20 ورلڈکپ پر کورونا حملہ ہوا،کوئی ٹیم یا کھلاڑی اس سے متاثر ہوا تو پھر کیا ہوگا،آئی سی سی نے بڑا اعلان کردیا،تفصیلات https://t.co/FpmhahZ7RB #T20WorldCup2022 #ICC #cricagain https://t.co/aKmDhFwzrm	Corona attack on T20 World Cup, what will happen if a team or player is affected by it, ICC has made a big announcement, details https://t.co/FpmhahZ7RB #T20WorldCup2022 #ICC #cricagain https://t.co/aKmDhFwzrm	کون سا نیا قانون آگیا إ ۱ انزت[ “0 ,, 07 ۸۸۸ ہیں	What new law has come? honor[ “0 ,, 07 are 888	No_Hate
1578708501794545666	@soldierspeaks سیاستدان اور جرنلز امریکہ اسرائیل کے پالے ہویے کتے ہیں https://t.co/l88Gu13leV	@soldierspeaks politicians and journos are America's pet dogs of Israel https://t.co/l88Gu13leV	NIL	NIL	Hate
1561744963737640960	#امپورٹڈ_حکومت_نامنظور ڈیرہ غازی خان سیلاب ۔۔۔۔ یا اللہ زرداری،شریف خاندان،فضل الرحمن،بیوروکریسی میڈیا صحافی وغیرہ کے بچے بھی ایسے مریں ۔ آمین۔ سیلاب سے جنوبی پنجاب خاص کر ڈیرہ تباہ ہوا مگر میڈیا اور سیاست دانوں کو کرسی کی لالچ ۔۔۔ https://t.co/akfzNz5BAY	#imported_government_disapproved Dera Ghazi Khan flood. Or the children of Allah Zardari, Sharif family, Fazlur Rahman, Bureaucracy media journalists etc. also died like this. Amen. Southern Punjab especially Dera was destroyed due to flood, but media and politicians are greedy for the chair. https://t.co/akfzNz5BAY	NIL	NIL	Hate
1593610903236317185	وحدت اُمت کے نام پر نہ دھوکا دواُمت کو گستاخ صحابہؓ سے کبھی اُمت نہیں بنتی https://t.co/e6pO00ZZPN	In the name of the unity of the nation, do not deceive the people An umma is never made from arrogant companions https://t.co/e6pO00ZZPN	NIL	NIL	No_Hate
1568916716549177344	@Shabanashaukat4 جس سندھ میں غریبوں کا حق دکانوں په بیچا جاتا هے اس سندھ پر الله کا عذاب ھی تو آیگا۔ اور کیا رحمت برسےگی کیا ؟؟؟؟ ویسے بھی تم سندھی جب تک اپنی حالت خود نیں بدلو گے تب تک الله کے عذاب نازل هوتےرهیں گے انشاالله۔ خاص طور پر تم جیسے گھٹیاترین لوگوں کیساتھ هونا بھی ایسا ھی چاھیے آمین۔ https://t.co/w1Nt5xCKrJ	@Shabanashaukat4 In Sindh, where the rights of the poor are sold in shops, God's punishment will come to this Sindh. And will there be mercy? Anyway, until you Sindhis change your situation, Allah's punishment will continue to descend, Inshallah. Especially with the worst people like you. https://t.co/w1Nt5xCKrJ	NIL	NIL	Hate
1587745657896505345	ب تک 136 پاکستانی فوجی اپنے فرائض منصبی کی ادائیگی کے دوران شہادت کو گلے لگاچکے ہیں اور تقریباً اتنے ہی زخمی بھی ہوئے ہیں جب کہ ہر سال اوسطاً تقریباً 2 فوجی دنیا کے کسی نہ کسی حصے میں قیام امن کی کوششوں میں شہادت کے منصب پر فائز ہوئے ہیں۔ ./ #پاک_فوج_امن_کی_ضامن https://t.co/LyUeUBINV8	Till date, 136 Pakistani soldiers have embraced martyrdom in the line of duty and nearly as many have been injured, while an average of 2 soldiers are martyred in peacekeeping efforts in some part of the world every year. have been ./ #Pak_Forge_Aman_Ki_Jaman https://t.co/LyUeUBINV8	آرمی چیف نے کراچی میں سیکیورٹی کی صورتحال کی بہتری کو یقینی بنانے میں سندھ پولیس اور پاک فوج کے کلیدی کردار کو سراہا۔	Army Chief in Karachi Improvement of the security situation Sindh Police in ensuring And the key role of Pakistan Army appreciated	No_Hate
1561083221244272644	@Marriyum_A @pmln_org ڈگڈگی پر ناچنے والی بندریا 😂 https://t.co/fTkwgYSeMR	@Marriyum_A @pmln_org Monkey dancing on the rock 😂 https://t.co/fTkwgYSeMR	3ا 1 ھ 3047 ۷ وزا١٢‏ آ1ء × وف ‎٥ ۲۴‏ 61 55355832 :0۲ا: " ٭ غاتون اؤل پر عملہ تو ؟ ‎۷5۶۴	3 A 1 H 3047 7 Waza 12 A1 × Wow 5 24 61 55355832 :02a: " * Ghatun So the staff at Aul? 7564	Hate
1566730256777715714	سکھر، عمران خان کی سیلاب متاثرین سے ملاقات، سیلاب متاثرین کے ساتھ ہی دوپہر کا کھانا کھایا سیلاب متاثرین کے مسائل سنے, امداد کی تقسیم کے طریقہ کار پر بھی تبادلہ خیال کیا #InsafReliefProgram https://t.co/75iwguyNID	Sukkur, Imran Khan meets flood victims, has lunch with flood victims Heard the problems of the flood victims, also discussed the method of distribution of aid #InsafReliefProgram https://t.co/75iwguyNID	NIL	NIL	No_Hate
1613037602705113089	محبت و عقیدت ، اخلاص و اخلاق کے عظیم پیکر ہم سے رخصت ہوگئے۔ ایک عظیم مذہبی سماجی اور سیاسی باب بند۔اللہ تعالیٰ شہید چوہدری محمد افسر کے دراجات بے پناہ بلند و بالا فرما کر جنت الفردوس میں اعلیٰ و ارفع مقام عطا فرمائیں آمین ثم آمین یا ربنا یا کریم https://t.co/lxeF02jclh	Great figures of love, devotion, sincerity and morals have left us. A great religious, social and political chapter closed. May Allah Ta'ala raise the ranks of Shaheed Chaudhry Muhammad Afsar and give him a high place in Jannat al-Firdous.	گاہ انی موت سےکوگی یش یں سا مان سے بی لکا ہے پل یکی یٹس اعلان برائے نماز جخازہ عابینوازصاحب کے بھا ی 5 یر ننضل صاحب(ھرعع)کےکزن انی ۰ صدرر امن تا ہجرالن دجمنال حا ہی ر بات کے ماموں جا ٗ حا چو ہردی ش اض رصاحب(دعناں رای )وا نے پڑت تقداے ای سےوفات پا گئے ہیں مرحوع کی نماز جناز دمورخہ ‎٦‏ 1فرل2023ءءروزڑپرھ دن4 ےج ) 2 7 نماز جنازہ میں شرکت فر ما کر ثواب دارین حاصل کریں ایل اک( م9 )کو جن الفردوں میں اع …	Gah ani death se kogi yeshin sa maan se b laka hai pul yeki yats Announcement for Jakhaza prayer Abinwaz Saheb's brother 5 Yer Nanzal Sahib (Haraa)'s cousin Ani 0 Sadr Aman to Hijral Dajumnal Hahir Baat ke mamo ja However, Hardi Shaz Rasahib (Danan Rai) died Deaths have been found Funeral prayer of the deceased on 6 1 April 2023 Day 4 ) 2 7 Participate in the funeral prayer and get the reward Al-…	No_Hate
1596192755625078784	بھارتی کرکٹ ٹیم پاکستان کھیلنے نہ آئی تو ہم بھی بھارت نہیں جائیں گے،رمیز راجہ کا دو ٹوک فیصلہ https://t.co/aOTtpsdNq8 https://t.co/mmnmTgaFdE	If the Indian cricket team does not come to play in Pakistan, we will not go to India either, Rameez Raja's blunt decision https://t.co/aOTtpsdNq8 https://t.co/mmnmTgaFdE	بے 2ع 7	Bay 2 A 7	No_Hate
1594179702524370944	سور کی چربی کا بنا کارتوس خاکروب طارق زمان بلاک کر گیا۔ گانڈو کہیں کا۔ اپنی اولاد کو کینیڈا بھیجا ہے تعلیم کے لئے اور دوسروں کو پاک پھوج میں جانے کی ترغیب دیتا ہے۔ بہن چود گانڈو کہیں کا۔ شکل سے کرپٹ گانڈو افسر لگ رہا ہے۔ تُف ہو ایسے کنجروں پر https://t.co/doCQvss5zG	Tariq Zaman, a cartridge made of lard, was blocked. Gandu is somewhere. Has sent his children to Canada for education and encourages others to join the Pak Army. Sister Chud Gando Kahi. Looks like a corrupt Gando officer. Shame on such bastards https://t.co/doCQvss5zG	"خرغع۔ اعوان ہوں ماش ہے یہ اپے اوک جم لوگ مصیبت می سکنارا ضی سکرتے تفگ 611 0 6 لل 006( ۲3"ٛ 923۳۲30۲386 ‎٠٥ 69۲2۱۷۸58‏ 77.-.۔_ وشھوبار کے پچوڑے اور غاندالنی خاگروب بھی اب نام نے ساتھ اعوان لگائے ہیں	"Removal. Awan hoon mash hai yeh ape ok All people are in trouble Tafag 611 0 6 Lil 006 ( 23" 92332302386 05 692217858 77.-.._ Vishboar's back and Gandalni Khagrob also now The name has contributed	Hate
1561780179860692998	تمہاری اوقات یہ ہے کہ غریب قوم کے ٹیکسوں پر عیاشی کرنے والے تم۔لوگ ایک سیلف میڈ انسان کو اپنی درندگی کا نشانہ بنا رہے ہو۔۔۔۔۔ https://t.co/EoRESyv6gF	Your time is that you, who are enjoying the taxes of the poor people, are making a self-made person the target of your brutality. https://t.co/EoRESyv6gF	NIL	NIL	Hate
1568425998600884225	ہزاروں پاکستانی زائرین عراقی ویزہ ہونےکےباوجودکربلاجانےکےلیے ایران میں عراقی بارڈرکھلنےکےمنتظراور پریشان ہیں،لیکن انکاکوئی پرسان حال نہیں ہے،پاکستانی وزارت خارجہ کو اپنےان شہریوں کی مشکلات سےکوئی دلچسپی نہیں،یتیم اور لاوارث قوم یاپاکستانی شیعہ ہیں @BBhuttoZardari @HinaRKhar https://t.co/jUI8O48KS2	Thousands of Pakistani pilgrims to go to Karbala despite having Iraqi visa Iraqis in Iran are waiting and worried for the opening of the border, but they are not happy, the Pakistani Ministry of Foreign Affairs is not interested in the problems of its citizens, they are orphans and disinherited people or Pakistani Shia. @BBhuttoZardari @HinaRKhar https://t.co/jUI8O48KS2	بڑراروں پاکنتالی زا زین ران وڑہ مو ہے کے پاو جو دکر بااصب نے کے نے خ ا اہان بس عراتی ارڈ رکھلنیے حےختظراور / پان ہیں نان ا اکوگی سان عال ‎ - 72‏ ص. سی اپنے ان شہ ریو ںکی مامت ےکوئی گی خ ہیں سم اور [اوابخے قوم ا پاکمتالی حیعہہیں یاافضانستا یء 5۶ھ7 الاسلام و اکن علامیشگاشنش یدک حفظہ الڈد	Barraar Pakantali Za Zain Ran Wara Mo hai ke pao jo dikar baasab ne ke ke kha Just keep it naked and wait. Pan hain nan a akogi san aal - 72 p. C Do not mourn for these people Gi Kh are sim and [avabkha The nation is pure and pure 56 H7 Al-Islam wa Akin Alamishgashanish Yadak Hafza al-Dadd	Hate
1564234469007138816	نقاب پر پیوند لگا کر اپنے جسم کو لوگوں کی نظروں سے چھپانے والی یہ عورت اللہ تعالیٰ کے نزدیک اُس عورت سے کروڑوں گُنا زیادہ بہتر ہوگی جو عورت دس لاکھ کے کپڑے اور میک اپ کر کے بالوں کو کھول کر بے پردگی کے ساتھ باہر نکلتی ہے اللّٰہ اکبر ❤️ https://t.co/wDA3iF3fQv	This woman who hides her body from people's eyes by wearing a veil will be millions of times better than that woman in the eyes of Allah Ta'ala. The woman who wears a million dollar dress and make-up and leaves her hair open and goes out naked Allahu Akbar ❤️ https://t.co/wDA3iF3fQv	NIL	NIL	No_Hate
1568174410179174401	اگر FIFA کی سیکورٹی پاکستان کو خان صاحب کے دور میں ملی ہوتی تو ہر یوتھیا " پچھواڑے پ فٹ بال باندھ کر پھرتا "🤣😜🤣🤣 #کیاسب_کویوتھیاسمجھ_رکھاہے https://t.co/a8MhctFaSs	If FIFA's security had been given to Pakistan during Khan Sahib's tenure, every Uthya would be "walking around with a football on his back" 🤣😜🤣🤣 #Kyaasab_Koyuthiasmjh_Rakhahe https://t.co/a8MhctFaSs	"ا	"A	Hate
1567441037320224768	دعا میں التجا نہیں، تو عرضِ حال مسترد سرشت میں وفا نہیں، تو سَو جمال مسترد عبث ہیں وہ ریاضتیں جو یار نہ منا سکیں وہ ڈھول تھاپ بانسری، وہ ہر دھمال مسترد حسابِ عُمر دیکھ لو، کہ پھر پلِ صراط پر یہ نفس کے اگر مگر، فریبِ چال مسترد https://t.co/ILLPJECMZc	not pleading in prayer, So the situation is rejected Disloyalty to the system, So Jamal rejected Those efforts are in vain Those who cannot celebrate That drum beat flute, He rejects everything Look at the age calculation. Then on the Sarat bridge But if this self, Deception Rejected https://t.co/ILLPJECMZc	NIL	NIL	No_Hate
1573919983536689152	بچوں کو کیا پتا ہمارے مسلمان اس کو کافر کہتے ہیں۔ https://t.co/iGrFTEPS7C	Do children know that our Muslims call him infidels. https://t.co/iGrFTEPS7C	NIL	NIL	No_Hate
1578753628461883392	اسرائیل صرف طاقت کی زبان سمجھتا ہے،صیہونیوں کی دھمکیاں خالی ڈھول ہیں حزب اللہ لبنان کی مجلس عاملہ کے سربراہ شیخ علی دعموش #JafariaTv https://t.co/cxCuVBc0zw	Israel understands only the language of power, Zionist threats are empty drums The head of the Hizbollah Lebanon's Majlis-e-Ameela, Sheikh Ali Ataboush #JafariaTv https://t.co/cxCuVBc0zw	لےلئے نے ند ہل ترئےمہمہدہ ' صبہو نیوں کی دشمشیاں خالی ذشول ہیں سربراہ مجلس عاملہ جزب اللہ لبتان شیخ علی دعموش ۲3۲۱۸ ۲ً ۰ ۷	Lelye ne nad hil trie mahmehda' The dashamshis of Sabahu Niyo are empty The chairman of the executive committee, Jazbullah Labtan, Sheikh Ali Utabush 23218 2 0 7	No_Hate
1580159139963367425	بی ایل اے نے جوہان قلات میں اے ایف کی گاڑی کو دیسی ساختہ بم سے نشانہ بنایا۔ بی ایل اے کا ظلم و بربریت جاری ہے، کیچ میں ایک ہاکر اور کوئٹہ کے سریاب روڈ پر دستی بم حملے میں 5 شہریوں کو نشانہ بنایا۔ #Kalat #BalochCondemnsKalatIEDAttack #BalochAgainstBLA #BalochCondemnsBLA https://t.co/QEe4gWGjPT	BLA hit an AF vehicle with an improvised explosive device in Johan Kalat. The brutality of BLA continues, a hawker in Kech and 5 civilians were targeted in a grenade attack on Quetta's Sariab Road. #Kalat #BalochCondemnsKalatIEDAtack #BalochAgainstBLA #BalochCondemnsBLA https://t.co/QEe4gWGjPT	NIL	NIL	No_Hate
1568949022932582400	پاکستان کی جمہوریت اور مارشل لاء کے خلاف تاریخی جدوجہد کرنیوالی #مادر_جمہوریت بیگم کلثوم نواز صاحبہ، کو اللہ تعالیٰ جنت الفردوس میں اعلٰی مقام عطا فرمائے. آمین ثمہ آمین یا رب العالمین 🌺 https://t.co/BDlfvSU6Sy	May Allah give high place in Jannat al-Firdous to the historical struggle against Pakistan's democracy and martial law. Amen, Amen, Amen, Lord of the worlds 🌺 https://t.co/BDlfvSU6Sy	NIL	NIL	No_Hate
1578010159561023489	ڈاکو کا یہ کام گھناؤنا لگتا ہے دلہن کا تو یہ باپ لگتا ہے کیسے بدلتے ہیں رشتے سائیکل چلانے والا سگا بھائی لگتا ہے 😂😂😂😂 https://t.co/ENpAQBTPOQ	This work of a bandit looks disgusting It looks like the father of the bride How do relationships change? The cyclist looks like a sibling 😂😂😂😂 https://t.co/ENpAQBTPOQ	NIL	NIL	Hate
1591857304496123906	نیازی جب سے حکومت میں آیا تھا ملکی خزانوں پر اس نے ڈاکا ڈالا عوام کاپیسہ چوری کرکے ملک کو قرضوں میں ڈوبو دیا اور آج حکومت میں نہیں تو سڑکوں پرملک کی معیشت کو تباہ اور عوام کو نقصان پہنچا رہا ہے نیازی ملک کا اصل دشمن ہے اسے ملک کی کوئی پروا نہیں #ملک_دشمن_عمران_کذاب_نیازی https://t.co/voDx0bmbHt	Ever since Niazi came to the government, he robbed the country's treasury by stealing the people's money and drowned the country in debt. Today, if he is not in the government, he is destroying the country's economy and harming the people on the streets. Niazi is the real enemy of the country. The country does not care #ملك_دشمن_يمران_كازب_نيازي https://t.co/voDx0bmbHt	4ای 5 رووا لٹا 0ڈ 0 ولائل 0 ک۔ پا 50 با ذعا 1اک 30 تار لک ٭> 0 ول 0د پے لینٹ ایک -۰0: 3اد الاب 68ک ریا 0 ال لیر اکھاو 0 کیا	4 e 5 Rova Lata 0 d 0 Villail 0 k. Paw 50 Ba Zaa 1 Ak 30 Tar Lak *> 0 Will 0d PayLent A-00: 3 ad alab 68 k ria 0 Al Lear Akhao 0 Did	Hate
1566082502208487424	@saqibbashir156 @HasnaatMalik نیازی کے پالتو 🐕 اطہر کے ٹٹے چک کے جیو 🤪🤪🤪 https://t.co/n2Y8iZXMde	@saqibbashir156 @HasnaatMalik Niazi's pet 🐕 Long live Athar's ponies 🤪🤪🤪 https://t.co/n2Y8iZXMde	NIL	NIL	Hate
1585381959710412801	افسوس ناک خبر مورخ اسلام مولانا ضیاءالرحمن شھید کے فرزند مولانا ریحان ضیاء فاروقی صاحب کو اچانک ہاٹ اٹیک ہو گیا ہے دعا کی اپیل ہے کہ اللہ تعالی مولانا صاحب کو شفاء کاملہ عطاء فرماۓ.آمین @____Naina @AqibRajput78 @bisma_adv https://t.co/MRC3omMzKc	Sad news Maulana Rehan Zia Farooqi, the son of the historian of Islam Maulana Zia-ul-Rehman Shaheed, has suddenly had a hot attack. We pray that Allah Almighty will grant complete healing to Maulana Sahib. Ameen. @____Naina @AqibRajput78 @bisma_adv https://t.co/MRC3omMzKc	7ت 0ص کا ا لالح رما رے٤‏ 72ت رەالح 12 رمق کو گُلظ م۳ بل ول صے کہ کی ریف (اوک ومااے مد ےکک (زایے لات ہت نکی کہ کا زہن ربنم جا وفال تج مر ہے منجانب: اراکین سنی میڈیا ٹیم	7th 0s of Al-Ilah Rama Ray 4 72th Ralih 12 Rumaq to Gulz M3 Bill Will Say Ki ref (ok wmaae madekik (zaye laat hat nikki kah ka Zahn Rabnam Ja Wafal Tej Mur Hai By: Members Sunny Media Team	No_Hate
1563748569017982976	ابھی تو مرچوں والا ڈنڈا نہیں دیا اور یہ حالت ہو گئی https://t.co/JSyCTYHwxe	Now the chili stick has not been given and this situation has happened https://t.co/JSyCTYHwxe	NIL	NIL	Hate
1596901508913586178	پڑوسی ملک افغانستان کی جانب سے تیار کی جانے والی سپورٹس کار میڈا 9 سوشل میڈیا پر توجہ کا مرکز بنی ہوئی ہے افغانستان کی یہ پہلی سپورٹس کار اینٹوپ آٹو اسٹوڈیو کے سی ای او محمد رضا احمدی نے ٹیکنیکل ووکیشنل ایجوکیشن اینڈ انوویشن سینٹر کے لیے تیار کی ہے۔ محمد رضا احمدی پرامید ہیں 1/2 https://t.co/wKhFuamOfQ	The Meda 9, a sports car manufactured by neighboring Afghanistan, has become the center of attention on social media This first sports car of Afghanistan has been developed by Mohammad Reza Ahmadi, CEO of Entop Auto Studio, for the Technical Vocational Education and Innovation Center. Muhammad Raza Ahmadi is optimistic 1/2 https://t.co/wKhFuamOfQ	افغان لبان و ناو ترا نکرنے دا ی سا کیسے بنای	Afghan Lebanon and Nao Tara Nikrne How did you make it?	No_Hate
1568539132242051073	@iHafizHamdullah کاش آج ڈیزل ژندہ ہوتا تو مہنگائ کے خلاف لانگ مارچ ضرور کرتا کنجر 🤗 https://t.co/v63oDxgSiS	@iHafizHamdullah If only diesel was alive today, Kanjar would have marched against inflation 🤗 https://t.co/v63oDxgSiS	NIL	NIL	Hate
1567901066469212165	ایک دن شور ہوگا اُسکے گاؤں میں کہ غریب کا لڑکا افسر بن کے لوٹا ہے_❤️ https://t.co/emSyVNbGfL	One day there will be a noise in his village that a poor boy has returned as an officer ❤️ https://t.co/emSyVNbGfL	NIL	NIL	No_Hate
1581535418700378113	@Imrandawarr @Asad_Umar بلے کو ووٹ 1. معیشت کی تباھی کو ووٹ۔ 2. جھوٹ منافقت کو ووٹ 3. معاشرے کی اخلاقیات کی تباھی 4. جھوٹ جھوٹ جھوٹ اور جھوٹ منافقت 5. ھم جنس پرستی کا فروغ https://t.co/Isbvr6T2aj	Vote for @Imrandawarr @Asad_Umar bat 1. Vote to crash the economy. 2. Vote for lies and hypocrisy 3. Destruction of morals of the society 4. Lies, lies, lies and lies are hypocrisy 5. Promotion of homosexuality https://t.co/Isbvr6T2aj	' 7 ہاں ے چا ے چہار حھ 1 شس" ‎٠‏ ‏کوی میں ٣وج‏ مم 00 قع ٥۲ء‏ ١د‏ دہ تعہ] ۱ نط۱ہ۷	' 7 Yes, yes, four 1 Sixty" 0 3 in Koi Mmm 00 Qa 52 A 1 D Dah Tah] 1 Nat 1H 7	Hate
1565247873020997633	پاکستان کے سیلاب زدہ علاقوں میں کم از کم 6,50,000 حاملہ خواتین کو غیر معمولی قدرتی آفت سے نمٹنے کے لیے فوری طور پر دیکھ بھال کی ضرورت ہے جس سے 1,100 سے زیادہ افراد ہلاک اور 33 ملین سے زیادہ متاثر ہوئے ہیں #DhokebaazGeelani #GaddarGeelani #KashmirRejectsHurriyat https://t.co/OLFE1HZ6lT	At least 6,50,000 pregnant women in Pakistan's flood-affected areas need immediate care to cope with the unprecedented natural disaster that has killed more than 1,100 people and affected more than 33 million. #DhokebaazGeelani #GaddarGeelani #KashmirRejectsHurriyat https://t.co/OLFE1HZ6lT	NIL	NIL	No_Hate
1594205462290829312	ایک مغربی عورت جس نے ایک مسلمان سے محبت کی اسلام قبول کیا شادی کی،پاکستان آئی لیکن پاکستانیوں نے رہنے نادیا۔واپس چلی گئی گھر ٹوٹ گیا لیکن کبھی پاکستان کے خلاف نہیں بولی۔ کبھی مسلمانوں کو برا نہیں کہا، کبھی سابقہ شوہر کو بلیک میل نہیں کیا،اس عورت کو سلام،اسکی تربیت و کردار کو👍 https://t.co/TzGYNzN2Lp	A western woman who converted to Islam for love and married, came to Pakistan but Pakistanis refused to stay. She went back home broken but never spoke against Pakistan. Never said bad things to Muslims, never blackmailed ex-husband, salute to this woman, her training and character 👍 https://t.co/TzGYNzN2Lp	ناولنلم- سذمطوت٥‏	Novellam - Suzmatut 5	No_Hate
1559905533200683008	17 اگست 1988ء بہاولپور ائیر پورٹ پہ جرنیل اسلام ضیاءالحق شہیدؒ کی شہادت سے چند لمحات قبل لی گئی آخری تصویر جنرل ضیاءالحق کیپٹن اکبر لاشاری سےہاتھ ملاتے ہوئے😥😥😥😥😥😥 #دفاع پاکستان آئی ایس آئی #PakArmyZindabad #PakistanArmy #syedalibadshah #PakistanZindabad https://t.co/NDG724GJQu	General Islam at Bahawalpur Airport on 17 August 1988 It was taken a few moments before the martyrdom of Ziaul Haq Shaheed Last photo General Ziaul Haq holding hands with Captain Akbar Lashari Mixing 😥😥😥😥😥😥 #defence Pakistan ISI #PakArmyZindabad #PakistanArmy #syedalibadshah #PakistanZindabad https://t.co/NDG724GJQu	NIL	NIL	No_Hate
1598984542211084289	کبھی کبھی باجوہ صاحب انصار عباسی کے گھر رات گزار لیتے اور انصارعباسی اپنی بیوی کے ساتھ لٹا کے باہر نکل جاتے لیکن باجوہ صاحب نے کبھی گندی نظر نہیں رکھی انصارعباسی کی بیوی پر۔۔۔۔۔۔۔۔۔۔۔۔ https://t.co/PX9fkChl3g	Sometimes Bajwa would spend the night at Ansar Abbasi's house and Ansar Abbasi would go out with his wife, but Bajwa never cast a dirty eye on Ansar Abbasi's wife. https://t.co/PX9fkChl3g	×جزل اجوہ گی ش راب اور شیب کے قرب یں گی ان اک ےپور ےکی رت رمی لآ کٹ ان کے دا من ہرایگ دم ےکی بھ یکر پش ن ادا یں ۷	× Jezal Ajoh will be close to wine and Sheeb The blood of one of them will be cut off 7. Pay a lump sum payment	Hate
1572908024767053824	کوئی تو ہو جو ان رسموں سے اعلان بغاوت کرے کہیں تو اندھیرے میں کوئی چراخ جلانا چاہیے۔ (سروں پہ کفن انصاف کا پرچم) #ReadyForFinalCall https://t.co/vxclesxneM	If there is someone who declares rebellion against these rituals, then a lamp should be lit in the darkness. (Flag of Shroud Justice on heads) #ReadyForFinalCall https://t.co/vxclesxneM	NIL	NIL	No_Hate
1587724841548922880	#گھڑی_چور کفر شرک بےدین https://t.co/CjBR3u1ucl	#Watch_Thief Kufr Shirk Baydin https://t.co/CjBR3u1ucl	NIL	NIL	Hate
1593860982207614978	اسلام آباد کی یونین کونسل "کھنہ ڈاک" کے بلدیاتی الیکشن میں تقریباً افغانی پٹھان الیکشن لڑ رہے ہیں۔ پشتون تحریک انصاف صرف اور صرف افغانی پٹھانوں کی نمائیندہ جماعت ہے۔ جو کہ پنجاب میں افغانی پٹھانوں کی بالادستی چاہتی یے۔ جہلم کے پنجابی ان افغانی پٹھانوں کا بائیکاٹ کریں۔ https://t.co/pPdf6sVJGo	Almost Afghani Pathans are contesting in the municipal election of Union Council "Khanna Dak" of Islamabad. Pashtun Tehreek-e-Insaf is the only representative party of Afghan Pathans. Which wants the supremacy of Afghani Pathans in Punjab. Punjabis of Jhelum should boycott these Afghani Pathans. https://t.co/pPdf6sVJGo	9 ہے رن ہہ رین پاکتا لئ ر یک انصاف ۴۷ نامزدامیدواران 06-514 کا ...6 '	9 Hi Ran Ha Rin Purity and justice 6 of 47 candidates 06-514 '	Hate
1573973979978670080	سارہ قتل کیس؛ صحافی ایاز امیر جسمانی ریمانڈ پر پولیس کے حوالے #AyazAmir #suchtv https://t.co/Gw7CXcEsT4	Sara murder case; Journalist Ayaz Amir handed over to police on physical remand #AyazAmir #suchtv https://t.co/Gw7CXcEsT4	NIL	NIL	No_Hate
1593182694439284737	آزادی مارچ پختونخواہ کا قافلہ تیمرگرہ پہنچ گیا- پاکستانیوں تیار رہو ہم سب نے صادق اور امین لیڈر کے لئے اسلام آباد پہنچنا ہے-امپورٹڈ مسلط کردہ حکومت کو عمران خان کے خلاف کرپشن کا کوئی کیس نہ ملا گو گھڑی کو بہانہ بنا رہے-تمہاری یہ کوشش بھی ناکام رہے گی- @ImranRiazKhan https://t.co/QPwE4EbJWz	The convoy of Azadi March Pakhtunkhwa has reached Timurgarh - Pakistanis, be ready, we all have to reach Islamabad for Sadiq and Amin leader - Imported imposed government should not find any case of corruption against Imran Khan, even if the clock is used as an excuse - this is yours. The attempt will also fail- @ImranRiazKhan https://t.co/QPwE4EbJWz	NIL	NIL	Hate
1566739817957937154	بغیر لائسنس اسلحہ پاس رکھنا اور نمائش کرنا خلافِ قانون ہے پنجاب ہائی وے پٹرول کی ناجائز اسلحہ ہولڈرز کیخلاف قانونی کاروائی۔۔۔۔۔۔۔۔۔ https://t.co/PyIFwREYAL	Possession and display of firearms without a license is against the law Legal action of Punjab Highway Patrol against illegal arms holders. https://t.co/PyIFwREYAL	ای _ 20982951 ا ول 021ف	e_ 20982951 A. Will 021f	No_Hate
1557694067194085376	رنڈی کا بچہ سلاخوں کے پیچھے سب پی ٹی آئی والے ناجائز اولاد ہیں https://t.co/NlUJNCHu1M	Randy's kid behind bars All PTI are illegitimate children https://t.co/NlUJNCHu1M	NIL	NIL	Hate
1579511046116872192	پاکستان کی حالت 75 سال بعد اس طوائف سے بھی بدتر ہو گئ ہے جو دس بیس سال دھندھا کرنے کے بعد جسم کو سکون کا سانس دینے کے لئے ریٹائر ہو جاتی ہے۔۔۔پر مملکت خداداد پاکستان کے ساتھ تو طوائیفوں سے بدتر حالت ہے۔۔۔گھوم پھر کر وہی "گاہک" آجائے ہیں اس ریاست کی "عزت لوٹنے" https://t.co/aUKgx62oDA	After 75 years, the condition of Pakistan has become worse than that of a prostitute who retires after doing business for ten or twenty years to give her body a breath of peace. The same "customers" have come to "rob the honor" of this state https://t.co/aUKgx62oDA	NIL	NIL	Hate
1581951074759737346	جب کرتوت کالے ہوں اور ملکی خزانہ ہی لوٹنا ہو اور عوام کو اصل چہرہ نظر آ جاے تو الیکشن رزلٹ بھی اس سے زیادہ ذلت آمیز ہو گا اور شکلیں بھی ایسی ہی ہوں گی https://t.co/jWVJMXudPq	When the deeds are black and the country's treasure is to be looted and the people will see the real face, then the election result will be more humiliating and the forms will also be the same https://t.co/jWVJMXudPq	NIL	NIL	Hate
1573240189014933504	مریم کو پاسپورٹ واپس، اسحاق ڈار کو ریلیف،نواز شریف کو بھی ریلیف، MQM کے الطاف حسین کو شناختی کارڈ جاری کرنے کے آرڈر دئیے جارہے ہیں۔ بڑی مشکل سے امن قائم ہوا تھا لیکن پھر سے پاکستان کو آگ میں دھکیلنے کی کوشش کی جارہی ہے وہی پاکستان جہاں روز دھماکے ہوتے تھے ڈرون حملے ہوتے تھے😰 https://t.co/S1Woc1Mek7	Orders are being given to return passport to Maryam, relief to Ishaq Dar, relief to Nawaz Sharif, issue of identity card to MQM's Altaf Hussain. Peace was established with great difficulty, but again efforts are being made to push Pakistan into flames, the same Pakistan where there were explosions and drone attacks every day 😰 https://t.co/S1Woc1Mek7	7 ۸۰9581901 حھران خانع انس ننریک دو ر یں عوام کے لے و نت کا استعارہ ے_ پ	7 809581901 Harran Khana Anas Nanrek is a metaphor of people's life. P	Hate
1573573594646462466	فحاشی دھرنے کے نتائج https://t.co/Mq2yTFVhP8	The results of the obscenity sit-in https://t.co/Mq2yTFVhP8	‎٠ ٠۷۷‏ محلہ عالم آباد بھکر اع 380 ‏بھکر محلہ عالم آباد اعوان پٹرولیم کے قریب گلی سے نومولود بچہ پڑا ملا ھے زرائع ریسکو 1122 ‏بھکر بچے کو فسٹ ایڈ کے بعد ڈی ایچ کیو شفٹ کردیا گیا ھے پولیس کنٹرول کوبھی انفارمیشن کردیا ھے ریسکو 1122 ‏آج یہ تصویر دیکھ کر دل بہت افسردہ ھے ‏یہ کیسی مائیں ہیں یار جو چند منٹ کی ہوس مٹانے کے بعد اپنے جگر گوشوں کو چوک چوراھے پر پھینک کر چلی جاتی ہیں ‏یہی عذاب ہمارے اوپر آر…	0 077 Mohalla Alam Abad Bhakkar 380 From the street near Awan Petroleum, Bhakkar Mahal, Alamabad A newborn baby has been found lying down After giving first aid to the orphaned child, he was shifted to DHQ The police control has also been informed Resco 1122 Seeing this picture today, my heart is very sad What kind of mothers are these, my friend, who can erase the lust of a few minutes After thr…	Hate
1562073109313765376	امریکہ کا B52 بمبار طیارہ جسکو سروس میں شامل ہوئے ستر سال سے زائد عرصہ ہوگیا ہے۔ اس طیارے کو وقت کے ساتھ ساتھ بہت سی اپ گریڈز سے گزارا گیا ہے۔ https://t.co/3B5NW9prHH	America's B52 bomber has been in service for over seventy years. This aircraft has undergone many upgrades over time. https://t.co/3B5NW9prHH	NIL	NIL	No_Hate
1573166863835713537	اصلی چہرا 👍👋☠️👹@MaryamNSharif https://t.co/nrmJpvQ4WR	Real face 👍👋☠️👹 @MaryamNSharif https://t.co/nrmJpvQ4WR	NIL	NIL	Hate
1566695148364468224	@FarooquiJameel بڈھا ننگا https://t.co/qEP3IfuRgb	@FarooquiJameel big naked https://t.co/qEP3IfuRgb	NIL	NIL	Hate
1614491802769281029	کراچی میں عوام پی ٹی آئی کا جھنڈہ لگائے صبح سویرے ہی نکل آئی ہے، عوام کے اس جذبے کو آج کوئی شکست نہیں دے سکتا..! #بلے_پہ_ٹھپہ #کراچی_کپتان_کا https://t.co/c8v78eRfOV	In Karachi, the people have come out early in the morning with the PTI flag, nobody can defeat this spirit of the people today..! #बले_पुह_थपा #Karachi_Captain_Ka https://t.co/c8v78eRfOV	NIL	NIL	No_Hate
1606877573396447232	قائداعظم محمد علی جناح نے 23 مارچ 1940ء کو عالمگیری مسجد لاہور سے متصل علامہ محمد اقبال ؒ کے مزار پُر انوار کی جانب اشارہ کرتے ہوئے فرمایا تھا:’’اگر آج اقبالؒ زندہ ہوتے تو کتنے خوش ہوتے کہ ہم نے مسلمانان ہند کے لئے وہی کچھ کیا جو وہ چاہتے تھے۔ #قائد_اعظم_محمدعلی_جناح https://t.co/dqqbW0NKQW	On March 23, 1940, Quaid-e-Azam Muhammad Ali Jinnah, while pointing to the shrine of Allama Muhammad Iqbal near the Alamgiri Mosque in Lahore, said: "If Iqbal were alive today, how happy he would have been that we have done the same for the Muslims of India." Did what they wanted. #Quaid_Azam_MuhammadAli_Jinnah https://t.co/dqqbW0NKQW	NIL	NIL	No_Hate
1564255092257218560	عقل و شعور رکھنے والے معاشرے قدرتی آفات سے پہلے پیش بندی کرتے ہیں تا کہ نقصان سے بچا جا سکے جبکہ جاہل اور رجعت پسند معاشرے قدرتی آفات کو اللہ کا عذات کہہ کر غریب عوام کو حالات کے رحم و کرم پر چھوڑ دیتے ہیں۔۔ #TeamKHR #عوام_کاسہارابنو_لبیک_کاساتھ_دو https://t.co/kZLnxKc1rR	Smart and conscious societies take precautions before natural calamities to avoid damage While the ignorant and reactionary societies call natural calamities as the power of Allah and leave the poor people at the mercy of the circumstances. #TeamKHR #Awam_Kasaharabnu_Labik_Kasath_Do https://t.co/kZLnxKc1rR	NIL	NIL	Hate
1561772665634963456	ہم نہ لاڈوں سے پلے اور نہ نازوں سے بڑھے آتشِ زیست نے ہم کو خس و خاشاک کیا اتنا بچہ تو ابھی "ح" بھی نہیں لکھ پاتا حادثوں نے ہمیں جس عمر میں چالاک کیا 🖤 https://t.co/phpfSLIV9p	We were neither born with pampered nor raised with pampered The fire destroyed us Such a child can't even write "H" yet Accidents made us clever at the age 🖤 ​​https://t.co/phpfSLIV9p	NIL	NIL	No_Hate
1566420328129376256	امریکہ کے غلامی سے نجات کا وقت قریب ہے انشاءاللہ https://t.co/bhwScZieVO	The time to free America from slavery is near, God willing https://t.co/bhwScZieVO	NIL	NIL	No_Hate
1588198298820788228	@ImranRiazKhan سب کے نام ECL میں ڈالا جائے #عمران_خان_سچا_عاشق_رسول #عمران_خان_ہماری_ریڈ_لائن #ڈیم_بناؤ_ملک_بچاؤ https://t.co/8uqFYdlk2p	@ImranRiazKhan all names should be put in ECL #Imran_Khan_Sacha_Ashaq_Rasul #Imran_Khan_our_red_line #Dam_Build_Country_Save https://t.co/8uqFYdlk2p	NIL	NIL	No_Hate
1564082949372497922	سیکس کے دوران اگر کوئی مرد خاموش رہتا ہے باتیں نہیں کرتا بریlممے نہیں دباتا بدن نہیں چومتا ہونٹ کاٹ نہیں کھاتا تو اُسے چاہئے کسی عورت کی زندگی تباہ مت کرے اور کسی کمرے کے کونے میں پورن دیکھ کر اپنا خود ہلا کے ٹھنڈا ہوجائے۔ https://t.co/l5rKqv0m8A	If a man stays silent during sex, does not press his lips, does not kiss his body, does not bite his lips, then he should not destroy a woman's life and cool down by watching porn in the corner of a room. https://t.co/l5rKqv0m8A	NIL	NIL	Hate
1566728364131602432	@SdqJaan @AftabNaz11 عزت مآب اطہر من اللہ صاحب، کل کو آپ یہ نہ کہہ دینا کہ #پاکستان کا کوئی جج بھلا کرپٹ بھی ھوتا ھے...!!!! @IDRYS0 #امپورٹڈ_حکومت_نامنظور https://t.co/zphF2xfjrp	@SdqJaan @AftabNaz11 Honorable Athar Minullah Sahib, Don't say tomorrow that any judge of #Pakistan is corrupt...!!!! @IDRYS0 #imported_government_disapproved https://t.co/zphF2xfjrp	قیمت لگی تو قاضی و مختار بک گیا اک اک حوس نشاں سر بازار بک گیا اے صبح شرمسار گواہی رہے میری میں لڑ رہا تھا اور میرا سالار بک گیا	Qazi and Mukhtar sold out Each one was sold in the market O morning, be a shameful witness to me I was fighting and my salar was sold	Hate
1573047509840269313	دہشت گردوں کا سرگنہ فرقہ واریت پھیلانے والا زندیق کتا حامد لعنتی @GulBukhari @ImranRiazKhan @ImranKhanPTI @OfficialDGISPR @DGPPunjabPolice @ChParvezElahi @GFarooqi @MaryamNSharif @ItsFSW @OfficialDPRPP @allamaludhyanvi @AliAminKhanPTI https://t.co/fqo2okync5	Terrorist leader Hamid, the god of sectarianism, is cursed @GulBukhari @ImranRiazKhan @ImranKhanPTI @OfficialDGISPR @DGPPunjabPolice @ChParvezElahi @GFarooqi @MaryamNSharif @ItsFSW @OfficialDPRPP @allamaludhyanvi @AliAminKhanPTI https://t.co/fqo2okync5	NIL	NIL	Hate
1617403167766978561	کہاں مر گئے سارے عاشق اب سویڈن نے قرآن پاک کی حرمتی کی پنجاب کا وزیراعلی صحابہ کی شان میں گستاخی کرنے والا بنا دیا گیا لیکن تم سب بھنگ پی کر سو رہے ہو اب یقیناً باہر نہیں نکلو گے کیونکہ اچھی طرح جانتے ہو جنکے تم مہرے ہو وہ تمھیں تن دیں گے لعنتیوں #بددیانت_الیکشن_کمشنر_نامنظور https://t.co/H1HKoJxHTy	Where did all the lovers die? Now Sweden has desecrated the holy Quran. It was made, but you are all asleep after drinking cannabis, and you will not come out now, because you know very well that those you belong to will give you damnation. #बद्दियान्ट_अक्ष्टिक्ष_क्ष्ण्यान_नाज्ञोर https://t.co/H1HKoJxHTy	NIL	NIL	Hate
1606592615662723074	بریکنگ ڈیرہ اسماعیل خان تھانہ کلاچی میں پولیس موبائل اور APC پر یکے بعد دیگر فائرنگ اور دھماکہ،پولیس جوانوں کا بھرپور جواب، دہشت گرد بھاگنے پر مجبور https://t.co/ZPwlNCIPnN	Braking Dera Ismail Khan Police Mobile and APC in Kalachi police station fired and exploded one after the other, full response of policemen, terrorists forced to flee https://t.co/ZPwlNCIPnN	NIL	NIL	No_Hate
1560300453564682241	@Ahmad_Noorani جو اس کوٹھا سے لاٸی گٸی عورت نے شہباز گل صاحب کے بارے بکواس کی وہ تم کتوں خنزیروں کو نظر نہیں آتی بھڑوا گیرو ۔یہ گنجے کنجروں نے پتا نہیں کس کس کوٹھے سے گشتیاں لاکر اپنے بستر گرم کرتے رہے ہیں۔اب وہ گشتیاں اس ملک کی ماتا بن بیٹھی ہیں۔لعنت۔۔ یہ کوٸی سید ذات تو ہے نہیں جسکی عزت کی جا https://t.co/Ebjve503g9	@Ahmad_Noorani The woman who was brought from that hut said nonsense about Shahbaz Gul Sahib, you dogs don't see the pigs, you bastards. These bald bastards have been bringing guards from I don't know which house to warm their beds. Now those guards They have become the mother of this country. Curse. This is not a noble caste that should be respected https://t.co/Ebjve503g9	NIL	NIL	Hate
1561742206469394432	پاکستان کے آئین میں ایک شق ڈال دینی چاہئے، کوئی اُس وقت تک جنرل کے عہدے پر فائز نہیں ہو سکتا ، جب تک پتا نا لگایا جا سکے ، کہ وہ حلال کا ہے یا کسی کی ناجائز اولاد ہے۔ https://t.co/CXEZG9heSf	A clause should be inserted in the constitution of Pakistan, no one can hold the post of general until it is ascertained whether he is a legitimate or illegitimate child. https://t.co/CXEZG9heSf	NIL	NIL	Hate
1568009327239217152	@chsandhilaa شیطان یہ عورت ہے زندہ مردوں کو کھانے والی ڈائن https://t.co/yimmJzYMLz	@chsandhilaa Satan this woman is a witch who eats men alive https://t.co/yimmJzYMLz	NIL	NIL	Hate
1565735361233539074	بلاول صاحب جمهوریت کے دعویدار یہ تصویر دیکھ لو یہ علی وزیر ہیے جو دوسال سے ریاست پاکستان اور اپکے سندھ حکومت کے حکم پر بے گناہ جیل میں قید ہیں یہ تصویر جمہوریت اور ریاست کو جھوٹا ثابت کرنے میں کلیدی کردار اداکرہاہیں کے پاکستانيوں میں جمہوریت نہیں ہیں ؟ #ReleaseAliWazir https://t.co/t9nozxmh1L	Bilawal, the claimant of the republic, look at this picture. This is Ali Wazir, who has been imprisoned for two years by the order of the state of Pakistan and his Sindh government. ? #ReleaseAliWazir https://t.co/t9nozxmh1L	NIL	NIL	Hate
1577716631052206081	مقبوضہ جموں کشمیر کے اضلاع #شوپیاں اور #پلوامہ میں قابض بھارتی فوج کی فائرنگ سے مزید 5 کشمیری نوجوان شہید ہوگئے۔ جنت نظیر وادی کے ضلع شوپیاں کے علاقے #درچ میں قابض بھارتی فوج نے داخلی اور خارجی راستوں کو بند کرکے سرچ آپریشن کیا اور چادر و چار دیواری کے تقدس کو پامال کیا. (1/3) https://t.co/GMB0tlFSqx	5 more Kashmiri youths were martyred by firing by the occupying Indian Army in #Shopian and #Pulwama districts of Occupied Jammu & Kashmir. The occupied Indian Army conducted a search operation by closing the entry and exit routes in #Darch area of ​​Shopian district of Jannat Nazir valley and violated the sanctity of the chador and four walls. (1/3) https://t.co/GMB0tlFSqx	NIL	NIL	No_Hate
1564221568242302977	@iamshumaila7 @MashwaniAzhar یہ ہے بواسیر زدہ چہرہ اب چاٹو اس چہرے کو آفاقہ ہو گا آپ کو۔ کیونکہ یہ وہ پلید جانور ہے جو اپنا گند خود چاٹتا ہے۔ اور اس کے خواری بھی #یہودیوں_کا_بچہ_عمران https://t.co/NolUbNiCsp	@iamshumaila7 @MashwaniAzhar This is the face with hemorrhoids now lick this face you will be amazed. Because it is a dirty animal that licks its own dirt. And so are his servants #Jews_Ka_Bach_Imran https://t.co/NolUbNiCsp	ا ا ۲ اما ۰ ۲ اب 7 بے نول کا او کے یو خی ہو ری ےر ران	2 Umm 0 2 Now 7 Be Noel Ka OK U Khi Ho Ri Er Ran	Hate
1559922806753595392	بلالی کا سندہی عوام کو اوپن ائر کنڈیشنڈ ہسپتال کا لاجواب تحفہ لانتی 😁😂😂😂😂😂 https://t.co/IkfvW8tFtv	Bilali's Sindhi brings to the people a wonderful gift of an open air conditioned hospital 😁😂😂😂😂😂 https://t.co/IkfvW8tFtv	NIL	NIL	No_Hate
1578856903731388417	ہزاروں پشتون کو آج سوات میں ہونے والے جیسے جعلی مقابلوں میں مارا گیا ہے ) #PashtunLivesMatter https://t.co/lUaUJQmaGT	Thousands of Pashtuns have been killed in fake encounters like the one in Swat today ) #PashtunLivesMatter https://t.co/lUaUJQmaGT	NIL	NIL	Hate
1593814806850670593	خود ہی جج ہے اُس کے فیصلے پھر ٹلتے نہیں۔ وہاں ترازو بھی انصاف کے تلتے ہیں...!! صبح بخیر! https://t.co/Qj4nV0CKmn	You are the judge His decisions are not reversed. There the scales are also tipped with justice...!! Good morning! https://t.co/Qj4nV0CKmn	ک پچ 27 ےتا لع ِنَّ الله بَصِیرٌ بالعِبَادِ	K pitch 27 lol God knows best about the servants	No_Hate
1565554625046003714	پاکستان میں لوڑوں کی کمی تھی جو اسرائیل کا لوڑا پسند آیا😂😂😂 @hinaparvezbutt @SheraDhool @Sameerk35513537 @piyreyLatiif @petrool3 https://t.co/RDMc1st735	There was a shortage of bricks in Pakistan, which liked the bricks of Israel @hinaparvezbutt @SheraDhool @Sameerk35513537 @piyreyLatiif @petrool3 https://t.co/RDMc1st735	NIL	NIL	Hate
1598984476939669505	اس ٹوپی کی خاص بات یہ ہے کہ یہ ٹوپی امیر المجاہدین فنا فی خاتم النبین کی قبر انور کے اوپر سے مس کی گئی ہے اور جب بھی سر پر پہنتا ہوں تو ایک دلی مسرت ہوتی ہے 😍❤️ https://t.co/oCqYV3FqcB	The special thing about this hat is that this hat has been painted from the grave of Ameerul Mujahideen Fana Fe Khatamul Nabin, and every time I wear it on my head, I feel a heartfelt joy 😍❤️ https://t.co/oCqYV3FqcB	NIL	NIL	No_Hate
1577885711885287424	بد کردار ڈائن اور جادو ٹونے والی فراری آن پڑھ جاہل مریم صفدر https://t.co/MUrKf7F3Wu	Bad character witch and sorcery fugitive On reading ignorant Maryam Safdar https://t.co/MUrKf7F3Wu	NIL	NIL	Hate
1558436719485243392	اللہ پاک نے پاکستان کو اپنی بے شمار نعمتوں سے نوازا ہے یہاں، وسیع میدان، پہاڑ، سمندر، صحرا، جنگل ہیں۔ چاروں موسم ہیں، پاکستان کی جغرافیائی اہمیت سے کسی کو انکار نہیں یہ ایک ایٹمی ملک ہے #75YearsOfPakistan #DiamondJubileeofPakistan https://t.co/t43s8nnOGm	Allah has blessed Pakistan with countless blessings. Here, there are vast plains, mountains, seas, deserts, forests. There are four seasons, no one can deny the geographical importance of Pakistan, it is a nuclear country #75YearsOfPakistan #DiamondJubileeofPakistan https://t.co/t43s8nnOGm	NIL	NIL	No_Hate
1568070377070333952	اسی لیے نام بڑے پیار سے لیتے ہو ۔دو نمبر عورت۔جس زبان میں بات کرو گی اسی میں جواب ملے گا لعنتی اور چور خاندان https://t.co/S4h97xxQ9i	That's why you take names with great love. Two numbers, woman. In whatever language you speak, you will get an answer. Cursed and thief family https://t.co/S4h97xxQ9i	پر پدعہ کر جح پب تنک ہے تر حجر 110785 00۱۷۸۸۲۷۵۱۱۱۷۹۳3 ۷0ا5 کک ےس2 اک مر ۳- 7 2185 ںن	But in the end, it is a stone 110785 0017882751117933 70-5 Cook S2 One death 3- 7 2185	Hate
1607567854177591296	وہ منہ لگاتا ہے جب کوئی کام ہوتا ہے جو اس کا ہوتا ہے سمجھو غلام ہوتا ہے کسی کا ہو کے دوبارہ نہ آنا میری طرف محبتوں میں حلالہ حرام ہوتا ہے https://t.co/ejkYS7knKV	He frowns when something is done He who belongs to him is considered a slave Don't come back to me again Halal is forbidden in love https://t.co/ejkYS7knKV	NIL	NIL	No_Hate
1598829048947707904	سرد دسمبر لمبی راتیں اُجڑا دل اور تنہا میں کچھ چادر سے لپٹی یادیں اور چادر میں لپٹا میں کتنا بے خود لمحہ تھا نااک دوجے کو چھونےکا اُس لمحے میں یاد نہیں ۔۔اب اس یخ بستہ لمبی رات میں اُسکی آنکھیں اورگہری چُپ شایدمیری کھوج میں تھیں پھر یکسر سناٹا ٹوٹا۔۔ چیخا وہ تھا ۔۔۔۔ گونجا میں https://t.co/X3p0IKbjq4	Cold December long nights in a broken heart and lonely Some memories wrapped in a sheet and wrapped in a sheet What an amazing moment it was to touch Naak Duje I don't remember that moment. Now in this long frozen night His eyes and deep silence were probably searching for me Then the silence was broken. He was screaming. https://t.co/X3p0IKbjq4 in Gunja	NIL	NIL	No_Hate
1573633930280030209	بلاول نے امریکہ بیٹھ کر پاک فوج پر جو خودکش حملہ کیا ہے، #رجیم_چینج_کی_تباہ_کاریاں https://t.co/IimyebA7F3	Bilawal's suicide attack on Pakistan Army by sitting in America, #regime_change_key_destruction https://t.co/IimyebA7F3	NIL	NIL	Hate
1608327428375732224	جگمگاتا اک تارا ہوں بہت ساروں کا سہارا ہوں تنہا لڑتا ہوا کبھی نہیں ہارا ہوں مجھ کو نہ روکے کوئی مجھ کو نہ ٹوکے کوئی میرا ہے یہ جہاد یہی جینا مرنا ہے یہیں💪🇵🇰 https://t.co/jZAtybxBEo	I am a shining star I am the support of many I have never lost fighting alone Don't stop me Don't touch me This jihad is mine Live and die here 💪🇵🇰 https://t.co/jZAtybxBEo	NIL	NIL	No_Hate
1563690697160818688	بلوچستان کی #پشتون اور #بلوچ قوم یہ وقت یادرکھنا! ہماراصوبہ سیلاب میں ڈوب گیا۔ تب منظور پشتین اور محمودخان اچکزئی ہماری مدد کونہیں آہے اورنا ہی سرداراختر مینگل اور براہمداغ بگٹی نے ہماری مدد کرنےکی کوشش کی اس وقت @peaceforchange اور پاک آرمی ہی تھی جو ہمارے ساتھ کھڑی رہی۔ https://t.co/qButhyhAs7	Balochistan's #Pashtuns and #Baloch people remember this time! Our province was submerged in floods. Then Manzoor Pashteen and Mahmood Khan Achakzai did not come to our aid, nor did Sardar Akhtar Mengal and Brahmdagh Bugti try to help us. At that time it was @peaceforchange and Pak Army who stood by us. https://t.co/qButhyhAs7	NIL	NIL	Hate
1566058515055132674	حسب روایت علی وزیر کےدرخواست ضمانت کا فیصلہ آج بھی نہ ھوسکااگلی تاریخ دے دی گئی علی وزیرکےکیس میں پنجابی اسٹیبلشمینٹ، جوڈیشری،میڈیا،اورجمہوریت کے دعویدارسب ایک پیج پرہے عدالت انصاف نہیں دےسکتا، میڈیا کچھ بول یا دکھانہیں سکتا، اورجمہوریت کاتوصرف نام ہی باقی ہے #ReleaseAliWazir https://t.co/J0yaLgDNSG	According to tradition, the decision on Ali Wazir's bail application could not be made even today, the next date was given In Ali Wazir's case, the Punjabi establishment, judiciary, media, and democracy claimants are all on the same page. The court cannot give justice, the media cannot say or show anything, and only the name of democracy remains #ReleaseAliWazir https://t.co/J0yaLgDNSG	پک ا8010 كت اہم م۴	puck A8010 cut Important M4	Hate
1614567326237720576	شام کو رزلٹ آئے گا پی پی 90 امیدوار خود ہی ووٹ ڈال کر کامیاب پلیتی آئ مرزائ جماعت 80 امیدوار خود ہی ووٹ ڈال کر اگر اسٹیبلشمنٹ نے دوبارہ شب خون مارا عوام کے حق پر تو ملک کی تباہی قریب ہے عوام کو اپنا نمائندہ چننے دیا جائے اسٹیبلشمنٹ کا کام شفاف الیکشن کروانا ہے ناکہ سلیکٹ کرنا https://t.co/GwqbWcfWFI	The result will come in the evening. PP 90 candidates are successful by voting themselves Paliti I Mirzai Jamaat 80 candidates by voting themselves If the establishment again kills the right of the people, then the destruction of the country is near The people should be allowed to choose their representative. The job of the establishment is to conduct transparent elections, not to select them htt…	NIL	NIL	Hate
1578792158504833027	نائب صدر مسلم لیگ ن مریم نوازشریف کی میڈیا سے گفتگو ان آڈیو لیکس نے اس کے بیانیے کا تیاپانچہ کردیا ہے کیونکہ اس نےاپنےبیانیے میں جو کچھ کہا وہ سب جھوٹ اور سازش تھی فارن فنڈڈ فتنہ عمران نیازی بیرونی طاقتوں کا غلام ثابت ہوچکا ہے https://t.co/lrkx1PyY22	Vice President Muslim League-N Maryam Nawaz Sharif's conversation with the media These audio leaks have discredited his narrative because everything he said in his narrative was a lie and a conspiracy. Foreign Funded Sedition Imran Niazi has proved to be a slave of foreign powers https://t.co/lrkx1PyY22	ہے۔ رہ 1 . ٭ انآ ڈ اکس نے ا کے بیان ےکا تا ا کرد یا ےکیوکہ ا نے اپنے بیاے ٹیل جو نماد دس بگیھوٹ اورسا زش گی اور یہ بام تگمران ایی کے پپورشرزسیت پور یتو مو پی ئل چک سے	is Stay 1. * Anodx did what he said or because he did You will have two tails, which will be like ten bighoots, and this will be bam tagumran From E.K	Hate
1614496121866551297	قائد اعظم سے قائد اعظم ثانی تک۔۔! بیشک اللہ تعالٰی اپنے بندوں کو بچانے اور انکو راہ راست پر لانے کیلئے ہر 100 سالوں میں کم از کم ایک نجات دہندہ ضرور بھیجتا ہے، جو وقت کے فرعون سے ٹکرا کر اپنی قوم کو آزادی دلاتا ہے۔۔! #سیاست_کا_سلطان_عمران_خان @TeamPakPower https://t.co/ZvhPd0Ll2F	From Quaid-e-Azam to Quaid-e-Azam II! Indeed, Allah Ta'ala sends at least one savior every 100 years to save his servants and bring them to the right path. #Politics_of_Sultan_Imran_Khan @TeamPakPower https://t.co/ZvhPd0Ll2F	NIL	NIL	No_Hate
1560896064366039041	کیا ملے گا دل میں نفرت رکھ کے تھوڑی سی زندگی ہے ہنس کر گزار لیں 😊👑❤ ازقلم! تنہا_پرندہ..... https://t.co/dusEKmZkau	What will be gained by keeping hatred in the heart? Life is short, spend it laughing 😊👑❤ By the pen! Lone_Bird..... https://t.co/dusEKmZkau	NIL	NIL	No_Hate
1593189417920778240	ماسک پہنیں میل جول میں فاصلہ رکھیں ھمارے کھوتے کو کرونا وائرس چمٹ گیا ھے۔ پاکستان میں ابھی تک صرف دو جانوروں میں وائرس تجویز ھوا ھے ۔ ایک ساڈا کھوتا دوجا تھاڈا 🫢😝 https://t.co/SKxbAo7yPj	Wear a mask Keep social distance Corona virus has caught our attention. The virus has been suggested in only two animals in Pakistan so far. A Sada Khota Duja Thada 🫢😝 https://t.co/SKxbAo7yPj	NIL	NIL	Hate
1577377036284596224	@AzmaBokhariPMLN @Anwarkhan61101 کوئی فرق نہیں ہیں رنڈیو میں سب پھٹے ہووے کونڈم کی پیداوار ہیں کنجری کی نسل https://t.co/GJQnVMJ7rd	@AzmaBokhariPMLN @Anwarkhan61101 There is no difference, all the cracked Howe condoms in Randolph are a product of Kinjri generation https://t.co/GJQnVMJ7rd	NIL	NIL	Hate
1581271204333162497	جو لفافے بلو رانی کو اک عظیم وزیر خارجہ ثابت کرنے کی کوششوں میں لگے تھے ان کے منہ پر امریکن چپیڑ۔ بلورانی بھی حواس کھو بیٹھی فضول وضاحتیں دے کر ناکامی کو کم کرنا چاہ رہی https://t.co/uxpUHHvY1J	The envelopes that were used to prove Balu Rani as a great foreign minister were slapped by the Americans. Balurani is also losing her senses and trying to minimize the failure by giving useless explanations https://t.co/uxpUHHvY1J	توتےعا تاد وروی ایر اخا ۶ کور 70 ا رن خاتوں د فا /نا جا ۓ ٘ںءوے غارجے بلاول بے	Too much Air Akha 6 Core 70 Aran khaten da fa / na ja ye ّ٘و گارجی Bilawal Bay	Hate
1594127955353309184	*خوب اِن کا اندازِ گُفتار*🥰 *واللّٰہ کمال اِن کا لہجہ*🖤🤍 عشق فقیر کی طرح ایک ہی در کا عادی ہوتا ہے💚 جو در بہ در پھرے وہ فقیر نہیں بھکاری ہوتا ہے🌹 بابا جان کے شیر 💚 ماشااللہ💚 #Urs_E_BabaJan #ImamKhadimHussainRizvi @Syed92AhmedShah https://t.co/RvTinA2K0u	* His style of speech is good * By Allah, his accent is perfect * 🖤🤍 Love like a poor person is used to the same door He who goes from door to door is not a beggar Baba John's Lions 💚 Masha Allah 💚 #Urs_E_BabaJan #ImamKhadimHussainRizvi @Syed92AhmedShah https://t.co/RvTinA2K0u	NIL	NIL	No_Hate
1563489675826065413	لعنتی اداروں کے لئے جو قوم کے ٹیکس کے پیسوں پر پل رہے ہیں اور قوم کی گانڈ مار رہے ہیں https://t.co/yYfM4P22RK	For the damn corporations that are taking the nation's tax dollars and kicking the nation's ass https://t.co/yYfM4P22RK	تہمارے پیے ہمارے جصوں پ گی رہ ہیں ہمارےچؤول پاوژروغیلاب 1 ایا ے ھ۸ دق 15د صحیث جم 5 سر بل امت	Your drink is filling our hearts 1 8 min 15 d Sahih Gym 5 Head of Ummah	Hate
1578823994605641728	وفاقی وزیر داخلہ رانا ثنااللہ کی ہدایت پر تھانہ کراچی کمپنی میں شہری پر تشدد کے واقعے کی منصفانہ انکوائری کے لیے، ایس ایچ او کو معطل کر دیا گیا ہے، پولیس https://t.co/0kuZwZZy5R #IslamabadPolice #DawnNews https://t.co/8HYi9TjQNw	On the direction of Federal Interior Minister Rana Sanaullah, the SHO has been suspended for a fair inquiry into the incident of violence against a citizen in Karachi Police Station. https://t.co/0kuZwZZy5R #IslamabadPolice #DawnNews https://t.co/8HYi9TjQNw	ری بر شدد کا الزام الام آاد پللیں کا اف مع طل	Alleged violence Pupils' Af Mu'tal	No_Hate
1614505068006342657	الحمدللّٰہ ٹیم سرِعام اورنگی ٹاون کراچی نے گزشتہ رات 22-01-12 شدید سردی کو مد نظر رکھتے ہوئے ہنگامی بنیادوں پر بے نظیر کالونی تھورانی گوٹھ کے سفید پوش فیملیز میں رضائیوں کی تقسیم کا اہتمام کیا اللّٰہ پاک اس محنت اور کاوش کو قبول فرمائے۔ آمین ثم آمین @iqrarulhassan https://t.co/VNcfpawrbW	Alhamdulillah Team Sareeam Orangi Town Karachi last night 22-01-12 keeping in view the severe cold organized the distribution of Rezais among the white-clad families of Benazir Colony Thorani Goth on an emergency basis. May Allah accept this hard work and effort. Amen then Amen @iqrarulhassan https://t.co/VNcfpawrbW	NIL	NIL	No_Hate
1573500269941374978	اففف صبح صبح اٹھتے ہی امی جان کے خون گرما دینے والے یہ نظارے دیکھ کر عجیب سحرسی طاری ہوجاتی ہے کہ ان گوشت سے بھرے چوتڑوں پر لپٹی شلوار پھاڑ کر یہ مکھنی چوتڑ اور رانیں چاٹ چاٹ کر بڑے تندور جیسی گانڈ کو چود چود کر راڈ کا دہی ان مکھنی پاوں پر گرایا جائے۔ https://t.co/qy0kPZF2xC	As soon as mom wakes up in the morning, seeing this sight that warms the blood of my mother, she gets strangely excited to tear off the shalwar wrapped on these fleshy breasts and lick these buttery breasts and thighs and lick the big tandoor-like ass of the rod. Curd should be poured on these buttery feet. https://t.co/qy0kPZF2xC	NIL	NIL	Hate
1558024234856845315	اللہ صبر جمیل عطا فرماۓ بھت مار پڑی ھے ایسی جگھوں پہ کہ نہ اپنوں کو بتا سکتا ھے نہ پراٸیوں کو۔ https://t.co/u69fv1JH95	May Allah give patience to Jameel, he has been beaten in such a way that he cannot tell himself or others. https://t.co/u69fv1JH95	ة و٥‏ م3	5. M3	No_Hate
1579749088077447168	وفاقی وزیر نوابزادہ شاہ زین بگٹی نے کہا ہے کہ سیلاب کے بعد سب سے بڑا چیلنج متاثرین کو موذی امراض سے بچانا ہے ، حکومت سیلاب متاثرین کی بحالی کے لیے تمام ممکنہ وسائل بروئے کار لارہی ہے ،عالمی ادارہ صحت کی جانب سے سیلاب متاثرین کے لیے ادویات کی فراہمی قابل ستائش ہے. https://t.co/JY4QWCEsmX	Federal Minister Nawabzada Shah Zain Bugti has said that the biggest challenge after the flood is to protect the victims from infectious diseases, the government is using all possible resources to rehabilitate the flood victims. The supply of medicines is commendable. https://t.co/JY4QWCEsmX	۱۷۸۷۱۷۸۷ 00168580/7 (۲۲ھ۵ :ہ٥‏ ہ50)	17871787 00168580/7 (22H5:H5H50)	No_Hate
1615620188371664896	دہشت گردوں نے پاکستان کے داخلی اور خارجی امن کو تہہ و بالا کرنے کا کوئی موقع ہاتھ سے نہ جانے دیا، مگر ہر بار افواج ِ پاکستان کے آہنی عزم ، ثابت قدمی اور جُرات کے سامنے وہ چاروں شانے چت ہوتے گئے #IAmPakArmy https://t.co/ViNTAGMpSf	The terrorists did not miss any opportunity to destroy the internal and external peace of Pakistan, but every time they were defeated by the determination, steadfastness and courage of the Pakistan Army. #IAmPakArmy https://t.co/ViNTAGMpSf	میں یہ بات سجھناپڈڑ ےگ کہ ایک مبوط فورج کے بخی ہنیک محلم اور خود تار اس تک قیام کن ہی نھیں_ 7+0 00۸0 )۸)۷	I understand that it is a good forge Muhammed and Tar himself did not settle till then. 7+0 0080 )8)7	No_Hate
1581234428252409856	@NazirLeghari لو جی ایک اور آوارہ کتے کا بچہ بھی لفافہ صحافیوں میں شامل ہوگیا ہے۔ یہ بےضمیر انسان شکل سے مردار چوہا لگتا ہے۔ اس بےغیرت بےضمیر لفافہ صحافی کا نام لغاری ہے۔ https://t.co/gEvI00SS7L	@NazirLeghari Love another stray puppy has joined the envelope journalists. This unscrupulous man looks like a dead rat. The name of this dishonest and unscrupulous journalist is Laghari. https://t.co/gEvI00SS7L	لعنتی بےغیرت بدشکل لفافہ لغاری	Cursed disrespectful ugly envelope	Hate
1563839381714132996	چلو بھئی بھکاری پٹواریو۔ اپنی حکومت کی مدد کرو ان کو بھی اب اوورسیز پاکستانی یاد آ گئے ہیں ہم نے تو ان چوروں کو ایک پیسہ بھی نہیں دینا ہمیں معلوم ہے کہ پٹواریوں نے بھی ایک پیسہ اپنی چور حکومت کو نہیں دینا۔ البتہ کل مرشد کی اپیل پر جتنا ہو سکے ان شاء اللہ مدد کریں گے https://t.co/FVEBByZsTd	Come on beggars. Help your government, they have also remembered overseas Pakistanis. However, I will help as much as possible on Murshid's appeal tomorrow https://t.co/FVEBByZsTd	۲۸۴۲۸۷ ۶8۴۲۰٤ 21۸۷ ‏ت‎ ۸97 ٣6٤ ]30[1۰ ) 06۶6 102 ٥ ‏]مزا‎ ٢٢۷[ اہ ااهہم ٤ج‏ 9ا06 ٤5ء‏ زاماںا م۵ ‎٥:‏ ۰یہ5	284287 684204 2187 T 897 364 ]30[10) 0666 102 5 [Fun] 227[ Ah Ahhm 4c 9a06 45a Zamana M5 ‎5: 0eh5	Hate
1614978409842573312	مجھے یقین ہے مارچ، اپریل میں الیکشن ہو جائیں گے، عمران خان اور پھر آپ اسی طرح وزیراعظم بن جائیں گے جس طرح خرم شیر زمان کراچی کا میئر بن گیا ہے۔😊 https://t.co/Qpaghyk34h	I am sure elections will be held in March, April, Imran Khan And then you will become the prime minister in the same way Khurram Sher Zaman became the mayor of Karachi. 😊 https://t.co/Qpaghyk34h	NIL	NIL	No_Hate
1559866985122594818	اگرحسینؑ ابن علیؑ نہ ہوتےتو کعبہ ہوتا لیکن محترم نہ ہوتا،قرآن ہوتا لیکن محترم نہ ہوتا،عبادتیں ہوتیں لیکن محترم نہ ہوتیں،اِن سب کی حرمت حسینؑ ابن علیؑ نےبچائی اورحسینؑ ابن علیؑ کا شیعہ یعنی مدافع حرمت، یعنی جس کو اللہ نےحرمت دی اُس کے دفاع کانام تشیع ہے استادِ محترم سید جواد نقوی https://t.co/2KvnraBs5h	If Hussain (a.s.) was not Ibn Ali (a.s.), the Kaaba would have been there but it would not have been respected, the Quran would have been there but it would not have been respected, worships would have been there but they would not have been respected, Hussain (a.s.) saved the sanctity of all of them. The defense is Shia Respected teacher Syed Jawad Naqvi https://t.co/2KvnraBs5h	NIL	NIL	No_Hate
1606565405971329026	صدیوں کا بیٹا خطاب کیوں دیا گیا۔۔ ادارے سے ملک سے محبت کرنے والوں نے بہت کوششیں کی لیکن چول نے ان تمام کوششوں کو ناکام بنا کر ادارے کے منہ پر ذلت اور رسوائ کی وہ کالک ملی ہے جو سیاستدان ساری زندگی لگا کر بھی نہیں مل سکتے تھے۔ ایسے چغد لوگ صدیوں میں پیدا ہوتے ہیں۔🙅🤚 https://t.co/9ux1sMZygm	Why was the title of the son of the centuries given? Those who love the country made a lot of efforts for the institution, but by failing all these efforts, Chol has brought the face of humiliation and disgrace on the face of the institution, which the politicians could not get even if they spent their whole lives. Such people are born in centuries.🙅🤚 https://t.co/9ux1sMZygm	NIL	NIL	Hate
1563289812068876291	آصف علی زرداری کی نرسری کا انپڑھ شاگرد کا سگریٹ پینےکا انداز کچھ یوں ہے سی ایس ایس آفیسر انپڑھ کا اندز دیکھ کر سر شرم جہک گیا لاڈلے کو فوکل پرسن متاثرین کا بنایا گیا ہے یے بہی متاثرعوام پر ایک عذاب سےکم نہین پہلےان کی تربیت کرو پہرعوام کے پاس بہیجو سچ بولو تو کڑوا لگ جاتا ہے https://t.co/zI0thQ3IFK	This is how an illiterate student of Asif Ali Zardari's nursery smokes The CSS officer was ashamed to see Anpard's behavior Ladley has been made the focal person of the victims and is nothing less than a punishment for the affected people Train them first then go to the people It's bittersweet to tell the truth https://t.co/zI0thQ3IFK	NIL	NIL	Hate
1596192941428674560	*طاقت کا استعمال حکمرانوں کو مہنگا پڑے گا، ریکوڈک پر واویلہ کرنیوالے اپنا حصہ لے کر خاموش ہوگئے* *مولانا ہدایت الرحمن بلوچ* @MHidayatRehman @zoyabaluch @SirajOfficial @HaqDoTehreek https://t.co/qToiAyOkFQ	* The use of force will be expensive for the rulers, those who were complaining about Rekodik were silenced by taking their share* Maulana Hidayat Rehman Baloch @MHidayatRehman @zoyabaluch @SirajOfficial @HaqDoTehreek https://t.co/qToiAyOkFQ	طاقتکااستعا لحھررانو ںکوہہنگاپڑ ےگاءرمکوڈک پرواویلہ کل ا کر ند ان انا تصہ نےکر خام وش ہو گے :مو لا ناہدایت الئنین	Power is needed for the people of Harran to go to Ramkodak Pravela yesterday Akr nid in ana tsa neker kham vish hogge: mo la nahdayt ilainin	No_Hate
1614536511734644739	سوات مٹہ میں مہنگائی کے خلاف احتجاجی مظاہرہ ۔۔۔ پھر پی ٹی آئی بھائی کہتے ہیں کہ مولانا کے کارکن مہنگائی کے خلاف احتجاج نہیں کرتے۔۔ https://t.co/WsZRg9VN3p	Protest against inflation in Swat Matta. Then PTI brothers say that Maulana's workers do not protest against inflation. https://t.co/WsZRg9VN3p	NIL	NIL	No_Hate
1606593501742960640	جنرل اسلم بلوچ اور انکے ہمراہ جسمانی طور پر ہماری ساتھ نہیں لیکن ان کی فکر و نظریہ ہمارے ساتھ ہے آج ہر بلوچ جنرل کی نقش قدم پر چل کر دشمن کی نیندیں حرام کر رکھی ہے، #GenralAslamBaloch #TributeToGeneralAndComrades https://t.co/nAsZKOZ2oh	General Aslam Baloch and his companions are not physically with us, but their thoughts and ideas are with us. #GenralAslamBaloch #TributeToGeneralAndComrades https://t.co/nAsZKOZ2oh	NIL	NIL	Hate
1558440931208069120	چودہ اگست والے دن اس مہا چوتیا بنانے والے لوگوں کو مت بھولیں۔۔ !!! https://t.co/hbcxvTBh0M	Don't forget the people who make this Maha Chautiya on the 14th of August. !!! https://t.co/hbcxvTBh0M	۸۷ ہفتے دس دن میں پاکستان کے اندر نوکریوں کی بارش ہونے والی ہے: فیصل واوذڈا	87 Raining jobs within Pakistan in a week and ten days Wally is: Faisal Vawzda	Hate
1562942392243666944	یوسی کاک کے متاثر لوگ جو کہ بے گھر ہیں جن کا چولا کئی دنوں سے نہیں جلا اسی درد کو محسوس کرتے ہوئے یوسی کاک کے نوجوانوں نے ایک مھم بنائی ہے اور متاثر لوگوں کے لیے کھانا پھچھیا جس میں انسان دوستوں نے بھرپور مدد کی اور انھوں نے گائوں رفیق لغاری یوسی کاک کے 70 لوگوں کی بھوک مٹائی https://t.co/gWSPVZjtDD	The affected people of UCCAK who are homeless and whose hearth has not been lit for many days, feeling the pain, the youth of UCCAK have made a campaign and distributed food to the affected people, in which human friends have helped a lot and they have 70 people of village Rafiq Laghari UCKak were starved https://t.co/gWSPVZjtDD	> ٭	> *	No_Hate
1578753741452619776	#اڑی خبریں ارہی ہیں کہہ مقدس گاۓ عرف ہیکر نے ان دونوں کی ویڈیو بھی مارکیٹ میں پھینک دی______ #تلاش جاری ہے بے فکر رہیں______ #عمران_دلا https://t.co/cfTE3VySV0	#अडी खुबैरी अरही है कह कहा मुक्ष्ड गाय aka hacker also threw the video of both of them in the market ______ #Search is in progress Don't worry ______ #Imran_Dalla https://t.co/cfTE3VySV0	NIL	NIL	Hate
1560643076837744640	@RizviRoffing ویسے اس موقع پہ بابا جی نے نجدیوں کی اذان کے بارے میں جو کہا تھا وہ عقیدہ اب بھی قائم ہے کیا؟؟ حافظ سعید لشکر طیبہ والے دہشت گرد کے لئے رذیل جیسے الفاظ استعمال کرنا از روئے شریعت کیسا ہے؟؟ https://t.co/NbVujGvuBu	@RizviRoffing By the way, what Babaji said about the call to prayer of Najdis on this occasion, is the belief still valid?? Hafiz Saeed How is it according to Shariat to use words like razeel for a Lashkar-e-Taiba terrorist? https://t.co/NbVujGvuBu	NIL	NIL	No_Hate
1567466485752430592	اتنا شدت پسند تو ہونا بنتا ہے💞 کہ جو آپکا ہو وہ کسی اور کا نہ ہو...💞😊💞 #afridi https://t.co/erFsXFysXe	You have to be so extreme That what is yours should not be someone else's...💞😊💞 #afridi https://t.co/erFsXFysXe	NIL	NIL	No_Hate
1570866001709002752	@SaadVoteforpmln @CMShehbaz دلے پٹواری مریم کنجری کو جب بھی رات کو کہیں چھوڑ کے آتا ہے تو دلے کونڈم بھی ساتھ دے کہ آیا کر کسی سستی کنکری کے پلے https://t.co/jMRDviZiVS	@SaadVoteforpmln @CMShehbaz Daley Patwari whenever he leaves Maryam Kunjri somewhere at night, Daley Kundam should come with him to play with some cheap pebbles https://t.co/jMRDviZiVS	NIL	NIL	Hate
1567049777514221568	اس ہنستے ہوئے چہرے کو کوئی اداس نہیں کر سکتا https://t.co/nDBmNveaLf	No one can make this smiling face sad https://t.co/nDBmNveaLf	NIL	NIL	No_Hate
1573199982257410048	تعلیم تربیت کے لیئے اور تربیت ترقی کے لیئے ھو تو ہی کامیابی حاصل ھو سکتی ہے ورنہ محض ڈگریاں لیں یا گدھے پر کتابیں لاد دیں ایک برابر ہے ۔۔۔ https://t.co/tkI08lIQYE	Success can be achieved only if education is for training and training is for development, otherwise just taking degrees or loading books on donkeys is the same. https://t.co/tkI08lIQYE	NIL	NIL	No_Hate
1615953372871376898	یا اللہ مدارس و مساجد کا ترجمان قائد ملت اسلامیہ قائد جمعیت حضرت مولانا فضل الرحمٰن صاحب دامت برکاتہم العالیہ کی ہر شر اور فساد سے حفاظت فرما 🤲 آمین ثم آمین🤲🤲 https://t.co/IO6TaOs1rH	May Allah protect the leader of madrassas and mosques, Quaid Millat Islamia, Quaid Jamiat, Hazrat Maulana Fazlur Rehman Sahib from all evil and corruption. 🤲 Amen then Amen 🤲🤲 https://t.co/IO6TaOs1rH	NIL	NIL	No_Hate
1560131314975752192	#TaunsaNeedsAttention رَبَّی اَنِّىْ مَغْلُوْبٌ فَانْتَصِرْ۝ یا اللہ توں ہر چیز پرقادر ہے۔ہم بے بس ہماری مدد فرما۔ہمیں اس آفت سے نجات دلا!۔تونسہ میں حالیہ سیلابی تباہی سے لاکھوں لوگ بے گھر ہوئے ہیں ۔ان بے سہارالوگوں کی غیب سے مدد فرما آمین! https://t.co/M1J5bExl2l	#TownsaNeedsAttention ربَّي َنِّىْ مغْلوبٌ فَانْتَسِرْ۝ Oh Allah, Almighty. Please help us. We are helpless. Save us from this calamity! Millions of people have become homeless due to the recent flood disaster in Tunsa. Help these helpless people from the unseen, Amen! https://t.co/M1J5bExl2l	NIL	NIL	No_Hate
1598966917758611456	" اگر وہ شخص جُھوٹا اور بُزدِل نِکل آئے جِس کی مُحبت کی خاطر آپ نے اپنے آپ کو خوار کر دِیا ہو پھر احساسِ زیاں نہیں ہوتا ، پھر کُچھ اور ہی ہوتا ہے! ۔ " 💔🙂 https://t.co/WxdwT4zj42	"If that person turns out to be a liar and a coward for whose love you have humiliated yourself, then there is no sense of loss, then something else happens!" 💔🙂 https://t.co/WxdwT4zj42	NIL	NIL	No_Hate
1566709759725690880	سارے نواز نواز شریف نہیں ہوتے وہ لوٹیرہ بھیڑیا منحوس آلو گوشت سری پائے پھجے ایک ہی ہے پلیز ریٹوٹ کریں https://t.co/opGB78swdE	All Nawaz are not Nawaz Sharif, they are the looter, the wolf, the evil potato, the meat, the sari, the fat, the same Please retweet https://t.co/opGB78swdE	NIL	NIL	Hate
1563829806285873152	حیدرآباد 28 اگست 2022 سیکٹر آئی کے وفاپرست ساتھیوں کی جانب سے حیدرآباد لطیف آباد یونٹ نمبر 11 کے مختلف مقامات پر الطاف حسین بھائی کے بینرز آویزاں کر دیۓ گئے خدمتِ خلق کے لئے الطاف حسین ضروری ہے جئے الطاف حسین بھائی ❤ جئے وفاپرست مہاجر ✌ #الطاف_حق_پر_ہے https://t.co/DKzzRT0PYf	Hyderabad 28 August 2022 Banners of Altaf Hussain Bhai were displayed at different places of Hyderabad Latifabad Unit No. 11 by the loyal colleagues of Sector I. Altaf Hussain is essential for the service of people Jai Altaf Hussain brother ❤ Long live the faithful migrant ✌ #التاف_حق_پر_هي https://t.co/DKzzRT0PYf	NIL	NIL	No_Hate
1578034667315695624	جسٹس صاحب جان کی مان پاو تو زرا یہ بھی بتا دیں کہ اپ نے عوام کے ووٹ کی توہین کیسے اور کیوں کی اپ کو کس نے احتیار دیا تھا کہ اپ عوام کے منتحب کردہ نمائیدے کو ایک سکنڈ میں گھر بھیج دیں اپ نے کسی سے پوچھا کہ عوام کیا چاہتے ہیں۔؟ https://t.co/Pyp33GwrZ9	If you can believe Justice Sir John, then tell me how and why you insulted the people's vote. Who authorized you to send the elected representative home in a second? What do the people want? https://t.co/Pyp33GwrZ9	99 ران ان علق کے عو ام مکی مر شی کے ای را سب یکیسے او کیوں کچھو ڑآ ۓ ؟	99 Ran in alak ke aum maki mer shi ke Hey everyone, why is it a turtle?	No_Hate
1566321405528088577	آدم کے کسی روپ کی تحقیر نہ کرنا پھرتا ہے زمانے میں ُخدا بھیس بدل بدل کر https://t.co/10ANBlUcMj	Do not despise any form of Adam God walks in time disguised https://t.co/10ANBlUcMj	NIL	NIL	No_Hate
1565754506146635776	صرف بھارت ہی نہیں بلکہ بخدا پاکستان بھی یہی چاہتا ہے https://t.co/MneyHD16xB	Not only India but also Pakistan wants this https://t.co/MneyHD16xB	۱۷۵۷۵880٦۲ ا0۲٢۵‎ )003۷۵١80۷۲م۴ ‏0۷0۷ص‎ شس بھارت چاہتا ہے میں مر جاؤں: شیخ رشید 7۲30513+6 ٤٣	1757588062 A0225 ) 0037518072 M4 0707 p Six India wants me dead: Sheikh Rasheed 7230513+6 43	Hate
1614979216721715201	نہ تعصب ، نہ غرور و تکبر ، نہ مال و زر کی بھوک،نہ کوٹھیوں،گاڑیوں کی ہوس ہم جیسا ہم میں سے۔۔ خدمت کے لیے بے قرار،دلیر ، بے باک ، ہر زبان ،قوم، نسل،رنگ اور ہر انسان سے محبت کرنے والا مخدوم نہیں خادم ہے ان شاءاللہ ، پاکستان چمکے گا ، دمکے گا، مثال بنے گا #AllamaKhadimHussainRiVi https://t.co/PdGdNKg2N7	No prejudice, no pride and arrogance, no hunger for wealth, no lust for mansions, cars Like us. The one who loves every language, nation, race, color and every human being is not a servant but a servant who is determined to serve, courageous, fearless. Inshallah, Pakistan will shine, shine, and become an example #AllamaKhadimHussainRiVi https://t.co/PdGdNKg2N7	NIL	NIL	No_Hate
1581307909035921408	@HajiQasimRizvi4 یہ ہے اس لنگڑے اور اس کے چرسی بیٹے کے جھوٹے عاشق رسول ۔ بیشرم پاکستان آرمی سے پیسے لیتے ہوۓ ناموس رسالت کا تحفظ کر رہے ہیں۔ لعنت تم گندے لوگوں پر۔۔ https://t.co/ByFDLMgA2Q	@HajiQasimRizvi4 This is the false lover of this lame and his son. Beshram is taking money from Pakistan Army and protecting the honorable Prophet. Curse you dirty people. https://t.co/ByFDLMgA2Q	NIL	NIL	Hate
1566063621532258305	کندن ہوئے ہیں آ گ ہی اپنی جلا کے ہم ہم پہ کسی سنار کی مرضی نہیں چلی #مرشد @ch_a95 https://t.co/zRcpIFroBS	We have been burned by fire No goldsmith's will was done to us #Murshid @ch_a95 https://t.co/zRcpIFroBS	NIL	NIL	No_Hate
1578721022320463872	آہ وہ راہِ صِراط بندوں کی کتنی بِساط اَلْمَدد اے رہنما تم پہ کروڑوں درود آس ہے کوئی نہ پاس ایک تمہاری ہے آس بس ہے یہی آسرا تم پہ کروڑوں درود (امام احمد رضا خان بریلوی) https://t.co/gXxl8xiRp9	Ah, how wide is the path of those who are bound Al-Madd O leader, millions of blessings on you There is no one there, one is yours That's all. Millions of blessings on you (Imam Ahmad Raza Khan Barelvi) https://t.co/gXxl8xiRp9	NIL	NIL	No_Hate
1568804566119874560	@SardarAbdulRe16 @RehamKhan1 گٹھیا ترین طوایف https://t.co/06UZZguIFs	@SardarAbdulRe16 @RehamKhan1 the most rheumatism https://t.co/06UZZguIFs	NIL	NIL	Hate
1566707854396264449	@writetofahim پہلے تھے نیوٹرل تو پاکستان ترقی کررہاتھا.لیکن جیسی ہی نیوٹرل نارہے پاکستان کو ایک ہزار ارب ڈالرز کا نقصان پہنچاچکے ہیں..خواجہ سب جانتاہے..جب ہی تو یہ گالیاں دیتے تھے.کہ ہماری مدد کرو.ورنہ ہم تو کو متنازعہ بنائیں گے https://t.co/ypm2Vcp5ez	@writetofahim Earlier, Pakistan was neutral, then Pakistan was developing. But the same neutral channels have caused a loss of 1000 billion dollars to Pakistan.. Khawaja knows everything. Will make https://t.co/ypm2Vcp5ez	۱ پر مع ہے تم یج ق۵ . برزقتابت گل اران جوا '.- کس سمتس : پروردگا ر ار ےگھرول او رم لکو ایم اجاڑے کہ دہ قیام تک کآباونہ ہو گگییں مل / 871ھ ۔	1 is with you. Q5. Barzqatabat Gul Aran Jawa '.- What Smiths: Purvardga r ar egharul o rum likko m ajade That they will remain until the establishment Mill / 871 AH	Hate
1587516011200258051	خوں بہایا گیا تو ملا یہ وطن ہر مہاجر کی دل کی دعا یہ وطن ہم کو ہجرت کی قربانیوں سے ملا جو وطن تم کو آسانیوں سے ملا پر صلہ اہل ہجرت نے پایا نہیں دل میں اہل زمیں نے بسایا نہیں تب ہی الطاف نے یہ لگائی صدا ائے مہاجر سنو یہ ہمارا وطن ہم پہ مقتل بنا ہے یہ سارا وطن @AltafHussain_90 https://t.co/oHbZl6WSEb	If blood was shed, this country was found This homeland is the prayer of every migrant's heart We received from the sacrifices of migration The homeland that you found easily But the emigrants did not get the reward The people of the earth did not settle in the heart That's when Altaf made this sound O Mihajir, listen, this is our country This entire country has become a death knell for us @Altaf…	NIL	NIL	Hate
1614212360138285056	سمگلنگ کی گئی چینی افغان باڈر پر پڑی ہے https://t.co/jENQJsfAiJ	Smuggled sugar lies at Afghan border https://t.co/jENQJsfAiJ	NIL	NIL	No_Hate
1608341941057474561	زیادہ تعداد میں بچے رکھنا کیا ہے https://t.co/2mhrKvKyA9	What is having more children https://t.co/2mhrKvKyA9	ہمارے معاشرے آدن ے زیاوہ اٹاثہ رکھنا تو مم ے ین آرن سے زیادہ جج رکھناکوتی الو نہیں...!! خی	Our society should be more attached to it It is not a good idea to have more judges than Yen Aran...!! Hey	No_Hate
1606906788200284160	@AktharHashmi 25 دسمبر یوم پیدائش بانی پاکستان قائد اعظم محمد علی جناح رحمتہ اللہ علیہ ۔اللہ پاک بانی پاکستان کی قبر پر کروڑوں رحمتیں نازل فرمائے اور درجات میں بلندیاں عطاء فرمائے آمین ثم آمین یارب العالمین https://t.co/YtlMnM9D07	@AktharHashmi December 25th Birth Anniversary of the Founder of Pakistan Quaid-e-Azam Muhammad Ali Jinnah May Allah shower millions of blessings on the grave of the founder of Pakistan and grant him elevation in ranks.	چٹ ی یں سہنااورقر و ْ یی زادہ اد نا شی اوڑت اٹ کی ضقیت ےا ین 0 یی سرن آگ مین پکرکندن بن جا تاے۔	Chit-i-ni Sahana and Qar ْ Ye zada ad na shi oudat it ki zaqit ya yin 0 Ye Saran becomes fire in the fire.	No_Hate
1593305823694016513	@Skiper786 اللہ پاک اس کی اولاد اور نسلیں بھی اس مجرمہ کی انکھوں کے سامنے فرمائشی تشدد پر عبرتناک قتل ہوں اور پھر اس دن اس سے کہا جاۓ کہ واقعی دنیا مکافات عمل ہوتی ھے نہ۔ آمین پتہ چل گیا نہ غیور پاکستانیوں😡 https://t.co/SElogrZpyN	@Skiper786 May God bless her children and generations also in front of this criminal's eyes for wanton violence and then on that day she will be told that the world is really a punishment, isn't it? Amen It was found out that the careless Pakistanis are not 😡 https://t.co/SElogrZpyN	9ء 2 13 71 5 رز چیف جٹس صاحب! پیک ری یک ہک سکواتقاخص تھامہ ای نے ارشد شر یف کو شب دککرنے سے پیل اتنا تقد دکیا عسامططلیم یہ ٭ 11 ۴).--- +44 81 0( ۲۷۵6٤ ‏۲ہ‎ ۲٢۳از‎	9 2 13 71 5 Riz Chief Jats sir! Arshad Sharif He gave so much devotion from nightfall Assam Muttalim This * 11 4).--- +44 81 0( 27564 2h 223az	Hate
1562997054015606784	یہ بندہ بکتا نہیں بلکہ کراۓ پہ مل جاتا ہے #اسلام_دشمن_ڈیزل https://t.co/5VFlgJ8Kl4	This item is not sold but is available for rent #Islam_Enemy_Diesel https://t.co/5VFlgJ8Kl4	شرو عکرتاہوں اع پلیہ کے نام ے ج بت ڈالردیۓ دالاے	In the name of Shro Akritaha Aa Puliya Give me a dollar	Hate
1593198675853209601	دینہ ظلع جہلم لانگ مارچ شرکا کی ایک جھلک . #WeTrustImranKhan https://t.co/IC7St3e5VC	A glimpse of the participants of Dina Zula Jhelum Long March. #WeTrustImranKhan https://t.co/IC7St3e5VC	NIL	NIL	No_Hate
1607329280131989505	پاکستانیوں کی کاروبار کی سوچ : چپس یا برگر کے ٹیھلے سے علاقے میں جنرل اسٹور تک ہوتی۔ دنیا وہی چپس اور برگر کے لیے ٹھیلا اور جنرل اسٹور کی دکان نہیں بلکے ایک برانڈ اور بین لاقوامی کمپنی بنا لیتی ہے۔ https://t.co/5UoFvyMjCW	Pakistanis thought of business: from a chip or burger joint to a general store in the area. The world becomes a brand and an international company rather than a chip and burger joint and a general store. https://t.co/5UoFvyMjCW	NIL	NIL	No_Hate
1606591958083854339	@sharjeelinam ظلم کے نشانے پر ایک تیر جیسی تھی بینظیر تو بس،'''''''''' بینظیر جیسی تھی. #MissYouSMBB SAHIBA 🇱🇾🔥🇱🇾 #DaughterOfTheEast https://t.co/197MmIN8Tz	@sharjeelinam was like an arrow on the target of oppression Benazir was just like Benazir. #MissYouSMBB SAHIBA 🇱🇾🔥🇱🇾 #DaughterOfTheEast https://t.co/197MmIN8Tz	NIL	NIL	No_Hate
1578734906506891264	@Marriyum_A ھر غیرت مند پاکستانی کے منہ پر تھپڑ ھے بی بی۔ اب اگر خان اور دو چار اور لوگ اسے اپنے منہ پر تھپڑ سمجھ رہے ھیں تو مطلب یہ ھے کہ ھم میں اور خان میں غیرت باقی ھے۔ کچھ سمجھ آی میڈم ٰدو….. ھزار….. روپے وہ بھی اپنے…۔ لکھ دی لعنت ڈڈو چارجر https://t.co/1QHWqqQjwN	@Marriyum_A Every proud Pakistani is slapped on the face, Bibi. Now if Khan and two or four other people are considering it as a slap on their face, it means that we and Khan still have honor. I understand something, madam, two.... thousand.... Rs. Lakh Di Kalanta Dado Charger https://t.co/1QHWqqQjwN	عمران خان کے منہ پر نہیں بلکہ یہ عدلیہ کے منہ پر تھپڑ ہے یہ پاکستان کے نظام پر تھپڑ ہے,یہ پاکستان کی عوام کے منہ پر تھپڑ ہے یہ ان لوگوں کے منہ پر تھپڑ ہے جو ہے گناہ جیلوں میں ہیں ۲۲3٦5ا3+6‎ ٦٤۷ ےحرے جحاھ]؛ سض م4 ہرےرفٛد :رر ‎٦!‏ , (ٴ۷(٥6‏ ہہرےت) 07), 0۸۸ جادگی۸۱	Not on the face of Imran Khan, but this judiciary This system of Pakistan is a slap on the face It is a slap on the face of the people of Pakistan It is a slap in the face to those who Sins are in prisons 22365a3+6 647 Yehre Jahah]; SAD M4 Harrefٛd: RAR 6!	Hate
1577761618548690946	فواد چوہدری بھڑوا یہ وہ بیغیرت انسان ہےجو ہر PTI کے جلسہ میں ہیرا منڈی سے اپنے پنجابی بہنوں کوگاڑی میں بٹھاکر بھر بھر کےلاتا ہے پختونوں کے بارے میں ایسی بکواس کی ہے کہ شاید کسی پختون نے انکی خارش بہت اچھے طریقے سے دورکی ہو اسلئیے تواتنے یقین سےکہ رہا ہے گا۔۔۔۔۔و #BoycottARYNews https://t.co/3G9tR5lf9q	Fawad Chaudhry Bhadwa is the humble person who brings his Punjabi sisters from Heera Mandi in a car in every PTI meeting. It has been said that #BoycottARYNews https://t.co/3G9tR5lf9q	NIL	NIL	Hate
1580109732635082753	دنیا کی بہترین قسم کی" دندی" جس میں بندہ خود انگلی دیکر کٹواتا اور اس کا مزا دنیا کی ہر چیز سے بہترین ہوتا ہے۔ اللّٰہ پاک تمام بچوں کو سلامت رکھے اور بے اولادوں کو نیک اور صالح اولاد عطا فرمائے. آمین https://t.co/U1ga6YJhRM	The best kind of "Dandi" in the world, in which the person cuts his own finger and his fun is better than anything in the world. May Allah keep all the children safe and grant good and righteous children to the childless. Amen https://t.co/U1ga6YJhRM	NIL	NIL	No_Hate
1564591302418759683	جعل سازی انکی گھٹی میں شامل ہے۔ یہ سارا خاندان ہی نوسر باز ہے۔ ذلت انکا مقدر بن چکی ہے۔ ہر جگہ ہر وقت دنیا کے ہر کونے میں ذلیل و رسواء ہو رہے ہیں لیکن نوسربازیوں سے باز نہیں آتے۔ @MrGondalll https://t.co/MKkks7KE1j	Forgery is among their worst. This whole family is a noob. Humiliation has become their destiny. Everywhere, all the time, in every corner of the world, they are being humiliated and humiliated, but they do not stop from innovations. @MrGondall https://t.co/MKkks7KE1j	NIL	NIL	Hate
1596191969583431681	#رول_آف_لاء کی سربلندی کے لیے سیکٹر G5 اسلام آباد میں منعقد کیئے ہوئے سیمینار میں شرکت_! #RuleOfLaw #زندہ_ہیں_وکلا #زندہ_ہیں #ملتے_ہیں_پنڈی_میں https://t.co/52ExWXTxqp	#Participation in the seminar organized in Sector G5 Islamabad for the promotion of #Rule_of_Law! #RuleOfLaw #Zinda_Hin_Wakla #Zinda_Hin #Milte_Hin_Pindi_Mein https://t.co/52ExWXTxqp	NIL	NIL	No_Hate
1617829307182911488	کپتان کے کھلاڑی 500 فالورز کا اضافہ کریں اور اپنے اکاؤنٹ کو مضبوط بنائیں جس کے فالورز ابھی تک تین 3.5K ہزار سے بھی کم ہے وہ اس ٹویٹ کو جلدی سی ریٹویٹ 🔁 کرکے اپنا اکاؤنٹ مینشن کریں تاکہ ان سب کو پروموٹ کیا جا سکے مجھے فالو کریں اور اپنا نوٹیفیکیشن آن کریں شکریہ https://t.co/ovncSTdZho	Captain player add 500 followers and strengthen your account who has less than 3.5K followers so far 🔁 quickly retweet this tweet 🔁 and mention your account to promote them all. Follow me and turn on your notifications thanks https://t.co/ovncSTdZho	٠ 2 7ال ۱ ہی 6-1	0 2 7 al 1 6-1	No_Hate
1559616753277501440	ہندوتوا لوگ نہیں جانتے کہ حضرت ٹیپو سلطان ملک کے پہلے مجاہد آزادی تھے‘ انہوں نے پہلی بار توپ ایجاد کی‘ ٹیپو سلطان ہی تھے جنہوں نے انگریزوں کے خلاف پہلی جنگ کا اعلان کیا‘ حضرت ٹیپو سلطان نے ملک کی خاطر جان دی تھی۔ https://t.co/8fFl58QcWX https://t.co/fbAcx3NzPY	Hindutva people do not know that Hazrat Tipu Sultan was the first freedom fighter of the country. He invented the cannon for the first time. It was Tipu Sultan who declared the first war against the British. Hazrat Tipu Sultan died for the sake of the country. https://t.co/8fFl58QcWX https://t.co/fbAcx3NzPY	NIL	NIL	No_Hate
1567059787388534785	حسین چہرے کی تابندگی مبارک ہو تجھے یہ سالگرہ کی خوشی مبارک ہو میں آپ کے لیے نیک خواہشات، ڈھیروں خوشیاں، اچھی صحت، ہمیشہ والی ہنسی اور آپ کے تمام خواب پورے ہونے کی تمنا کرتا ہوں۔ جنم دن مبارک ہوں بلال یاسر HBD 🎂✨ Best Wishes @BilalYasirBjr https://t.co/1LZdgQxFHi	Congratulations on the radiance of the handsome face Happy birthday to you I wish you all the best, lots of happiness, good health, eternal laughter and all your dreams come true. Happy birthday Bilal Yasir HBD 🎂✨ Best Wishes @BilalYasirBjr https://t.co/1LZdgQxFHi	NIL	NIL	No_Hate
1568894433336115200	دعویٰ__________ ہر ایک شخص کو دعویٰ ہے پارسائی کا سبھی فرشتے ہیں یارو کوئی بشر بھی ہے ______________👇 نگاہے عیب گیری سے جو دیکھا اہل عالم کو کوئی کافر، کوئی فاسق، کوئی زندیق اکبر تھا مگر جب ہو گیا دل احتساب نفس پر مائل ہوا ثابت کہ ہر فرزند آدم مجھ سے بہتر تھا https://t.co/tpmjrSg80X	claim __________ Every person has a claim to piety All are angels, some humans too ______________👇 What the people of the world saw with their eyes Akbar was an unbeliever, a transgressor, a zandiq But when the heart is inclined towards self-accountability Proved that every son of Adam was better than me https://t.co/tpmjrSg80X	NIL	NIL	No_Hate
1581540614302146567	کانپ اُٹھتا ہوں ، یہ سوچ کر جو سب سے قیمتی ہے وہ کھو تو نہیں گیا ، کہیں ماں کو کچھ ہو تو نہیں گیا ،میں جانتا ہوں، ماں تو ہمیشہ تو ساتھ نہیں رہے گی، لیکن آج ایک قسم دے رہا ہوں تیرے دودھ کی جتنی بوندیں میرے جسم میں دوڑ رہیں صرف اتنے برس جی لے، پھر چلی جانا https://t.co/p5sXoeACbp	I shudder, thinking that the most precious thing is not lost, if something happens to mother, I know, mother will not be with you forever, but today I swear by your milk. As many drops as run in my body only for so many years Live, then leave https://t.co/p5sXoeACbp	ہے سزورتول !ال سےاظ تجماں کے تا 71 'اپ1 متاوں ین اک یسب بھی سے وکھوق پسجیںک پاگییں ما ںو ونس یی ںکبا ریش صاضتاہول مال ق یت اننہسہیں ر ےکی لیکن ایس دےےد اہول حیسرے دودح یق فی لوند یل می رہ ےےہمعر یس دوڈر بی صرف اس گینے پحسر ہگ باتا )0۷۸۷۸0:660007	It is suzurtul! 71 'Ap1 mataon yin ak ysab bhi wakhuk After that, I found my mother and I had a rash But they did not have enough money S. Dayed Ahol Hisre Dudah Yaq Fe Lond yel mi rahe hmmar ys doder b only this Gane Pahsar Hug Bata ) 078780:660007	No_Hate
1566460264131829767	دنیا اسمان تک پنچ گیا۔پشتون عوام ریاست پاکستان سے روٹی کھانا نہیں صرف آمن چاہتاہے https://t.co/knzK0sPf4k	The world has been punched to the sky. The Pashtun people do not want to eat bread from the state of Pakistan, only Aman https://t.co/knzK0sPf4k	NIL	NIL	Hate
1614907558942195712	پی ٹی آئی کی رہنما عابدہ راجہ پر نامعلوم افراد کی فائرنگ https://t.co/qYOGZL2q3V @PTIofficial #Abidaraja #Firing https://t.co/ij2vwRsmen	Unknown persons fired on PTI leader Abida Raja https://t.co/qYOGZL2q3V @PTIofficial #Abidaraja #Firing https://t.co/ij2vwRsmen	NIL	NIL	No_Hate
1568938646413217793	کچھ لوگ اس ملک میں فساد پھیلانا چاہتے ہیں: خرم دستگیر https://t.co/RckNFANz7C https://t.co/OyIlpIKTLd	Some people want to spread riots in this country: Khurram Dastgir https://t.co/RckNFANz7C https://t.co/OyIlpIKTLd	NIL	NIL	No_Hate
1564205235308216320	@OfficialShehr تمام اہل وطن کو پیغام ہے کہ آپ کو اللہ اور رسول اللہ پاک کا واسطہ دے رہا ہوں کہ آپ ایسا پاکستان کی شان، مان، آن، افواج پاکستان کے ساتھ ایسا سلوک نہ کریں 😢 پاک افواج ہمارے جسم کا حصہ ہے https://t.co/jnkqZdWNfD	@OfficialShehr I have a message to all the countrymen that I am asking you by Allah and Rasoolullah PBUH that you should not treat the glory of Pakistan like this with Pakistan forces 😢 Pakistan forces are part of our body https: //t.co/jnkqZdWNfD	اے ماک ین تج ان ان	O mak yin tj in in in	No_Hate
1580899440344170496	ہم مڈل کے بغیر فائنل جیت گے واہ واہ کمال پاکستان ٹیم کا #PAKvNZ https://t.co/FiSeWWAjLm	We'll win the final without the middle wow awesome Pakistan team #PAKvNZ https://t.co/FiSeWWAjLm	NIL	NIL	No_Hate
1578399409389322240	نامرد دہشت گرد غدار وطن کی کانپیں ٹانگ رہی ہیں https://t.co/nbNYeT3a8c	Impotent terrorist traitors of the country are shaking https://t.co/nbNYeT3a8c	NIL	NIL	Hate
1593152420905119744	کالے شیشے کی صفائی ایک خوش آئین بات ہے اگر سرکار یہ نوٹیفکیشن بھی ساتھ جاری کریں کہ اگر کسی بھی شخص کے ساتھ کالے شیشے والا گاڑی پکڑ لیا تو گاڑی ضبط ہونے کے ساتھ ساتھ باری جرمانہ بھی عائد کیا جائے ۔ #wewantpeace https://t.co/x8VGrm2jDn	Cleaning of black glass is a good thing if the government also issues this notification that if any person is caught with a car with black glass, then the car will be impounded as well as a fine will be imposed. #wewantpeace https://t.co/x8VGrm2jDn	NIL	NIL	No_Hate
1581268860958756864	6 اگست 1945 کو،دوسری جنگ عظیم کے دوران،ایک امریکی B-29 بمبار نے ہیروشیما شہر پر دنیا کا پہلا تعینات ایٹم بم گرایا.دھماکے سے فوری طور پر ہزاروں افراد ہلاک ہو گئے۔مزید دس ہزار بعد میں خطرناک تابکاری سے مر گۓ‼️ SerVeNt Of JEws .... AMERICA #اسلحہ_فروش_امریکہ_بےلگام https://t.co/6bqhLMtIvg	On August 6, 1945, during World War II, an American B-29 bomber dropped the world's first deployed atomic bomb on the city of Hiroshima. The explosion killed thousands immediately. Tens of thousands more died later from dangerous radiation. ‼️ SerVeNt Of JEWS .... AMERICA #اسلہہ_فروش_امریکہ_Belgaum https://t.co/6bqhLMtIvg	بد ک0 ۲" 0۳۳۷(0( 0 دب لاک ہو گے مزید در ہز زار یں خطعٗ ناک تپادکا ری سے مم ًَ اسسستا	Bad K02" 0337(0( 0 will lock thousands more due to faulty performance. Assistant	No_Hate
1614458746155008000	عمران احمد نیازی ایک جھوٹا، مجار، دہشتگرد انسان ہے۔ سور ایک بیغیرت اور بے شرم تریں نجس جانور جو گروہ سیکس کرتے ہیں اور انسانوں میں عمران احمد نیازی اس سور سے بھی زیادہ سور ہے، جس نے وزیراعظم ھاوس کو چکلہ بنایا رھا۔ کھسروں کو بھی نہیں چھوڑا اس بد بخت انسان نے۔ https://t.co/AuDiwX8Ahq	Imran Ahmed Niazi is a liar, liar, terrorist. Pigs are the most impudent and shameless animals who have gang sex and Imran Ahmed Niazi is even more of a pig than the pig who is making the Prime Minister House a mess. This unfortunate person did not even leave the measles. https://t.co/AuDiwX8Ahq	NIL	NIL	Hate
1597666481105383424	@DunyaNews پیپلز پارٹی غریبوں اور کسانوں کی بات کرتی ہے اور انہیں اپنے جوتوں سے آگے نہیں بڑھنے دیتی غریبوں کو ملنے والی امداد کھا جاتی ہے اور اتنی غریب پرور ہے کہ میٹر ریڈ کو ارب پتی بنا دیتی ہے اور بھنگیوں کے سپر وائزر کو وزیر اعلیٰ! https://t.co/oSu4gkJnUL	@DunyaNews People's Party talks about the poor and the farmers and doesn't let them grow by their bootstraps, eats up the aid given to the poor and is so pro-poor that it makes Miter Red a billionaire and the supervisor of bhangis a chief minister. ! https://t.co/oSu4gkJnUL	9ا( ٭ ۰× 8ا 7:406 اعم 8535(۷ ۸۸ ۸۸۸۷۷۲۶۸۵ 51 دعت 20 سیت (و “انا (ڈ'	9a ( * 0x 8a 7:406 General 8535 (7 88 888772685 51 Da'at 20 Seth (W) Anna (D'	Hate
1615268392281247745	روسی پائلٹ رومانوف میخائیلوفیتس یوکرین میں جہنم پارسل۔ یہ درندہ Su-25 طیارہ اڑاتا تھا۔ اس نے 165 بار شامی شہریوں پر بمباری کی تھی۔ اس درندگی پر شامی خنزیر بشار نے اسے خصوصی ایوارڈ سے نوازا تھا۔ کل ڈونٹسک میں اس کا طیارہ گر گیا اور یہ بدبخت دوزخ پہنچ گیا۔ https://t.co/AogIPqu6xS	Russian pilot Romanov Mikhailovets hell parcel in Ukraine. This beast used to fly the Su-25 aircraft. It had bombed Syrian civilians 165 times. He was awarded a special award by the Syrian pig Bashar for this brutality. Yesterday his plane crashed in Donetsk and this wretch went to hell. https://t.co/AogIPqu6xS	NIL	NIL	Hate
1608652341653213187	قرطاس کے چہرے پہ....!! اک لفظ لکھا میں نے اُس لفظ کی خوشبو سے قرطاس معطر ہے....!! اُس نام کی کرنوں سے ہر چیز منور ہے......!! وہ لفظ مکمـــــــــل ہے......!! وہ لفظ مُحَمَّدﷺ ہے 💓مُحَمَّدﷺ💓 https://t.co/f28H6eyq2o	On the face of Kartas...!! I wrote one word By the smell of that word The paper is fragrant...!! By the rays of that name Everything is luminous......!! That word is perfect...!! That word is Muhammad 💓Muhammad peace be upon him💓 https://t.co/f28H6eyq2o	NIL	NIL	No_Hate
1580868548821282817	@RabNBaloch انعام کے طور پر یہ بھی لے لے اپنے پچھواڑے میں ایڈوانس https://t.co/e40iO6L7Xp	@RabNBaloch take this as a reward for the advance in your ass https://t.co/e40iO6L7Xp	NIL	NIL	Hate
1592945636177252353	اسلام جہاد کا درس دیتا ہے جب پوری امہ مسلم پر کفار یلغار بول دے جب مسلم بیٹیاں اغیار اٹھا کر لے جائیں ایسا درس دینے والے بابا جی رضوی رحمتہ اللہ علیہ کے شہر چلو۔ #چلوچلو_لاہورچلو https://t.co/wWzArUzsWr	Islam teaches Jihad when the entire Muslim Ummah says infidels attack, when the Muslim daughters are carried away, go to the city of Baba Ji Rizvi, may God bless him and grant him peace. #Chloochlo_Lahorechlo https://t.co/wWzArUzsWr	NIL	NIL	No_Hate
1567051976118001664	@FarooquiJameel یہ لیڈر نہیں یہ گیدر ہے عورتوں کی تذلیل کرنے والا کنجر بے غیرت نسل گیدر ہوسکتا ہے لیڈر نہیں https://t.co/vuDsrlxbCH	@FarooquiJameel it's not a leader it's a gathering A misogynist who insults women can be a shameless genocidal and not a leader https://t.co/vuDsrlxbCH	NIL	NIL	Hate
1593864087632486401	انشاءاللہ بہت جلد عمران خان وزیراعظم نہیں صدر پاکستان ہوگا۔ کیا آپ صدارتی نظام چاہتے ہے۔ ریٹویٹ ❤👇 https://t.co/l3pAQLOMWd	Inshallah very soon Imran Khan will not be the Prime Minister but the President of Pakistan. Do you want a presidential system? Retweet ❤👇 https://t.co/l3pAQLOMWd	NIL	NIL	No_Hate
1593860538127503362	جس کی فطرت میں محبت لکھا ہو ۔جس کی ہر سوچ اپنے قوم کیلئے ہو ۔جس کے دل میں ہر مظلوم بلوچ کیلئے محبت ہو ۔اُسے بُرے حالات ۔کبھی بھی اُس کے منزل سے رو کھ نہیں سکتے ۔کیوں کے اِنسانیت کیلئے لڑنے والا ہمیشہ اپنے ارادے پر قائم رہتا ہے ۔۔۔۔۔۔۔! Pullain baloch💙💚❤️ https://t.co/QrkZtCGQoe	Whose nature has love written in it. Whose every thought is for his nation. Whose heart has love for every oppressed Baloch. Bad situations can never stop him from his destination. Why is he always fighting for humanity? He sticks to his will! Pullain baloch💙💚❤️ https://t.co/QrkZtCGQoe	NIL	NIL	No_Hate
1566454327979409409	پنجابی خود کو مھاجروں اور پٹھانوں کی سازشوں سے بچائیں۔ پاکستان میں پنجاب ' پنجابیوں اور پاکستان کے لیے مسئلہ اور خطرہ سندھی اور بلوچ نہیں صرف اردو بولنے والے ھندوستانی مھاجر اور پٹھان ھیں۔ https://t.co/VwK3CMdsgG https://t.co/HYZViGRnEi	Punjabis should protect themselves from the intrigues of Muhajars and Pathans. Punjab in Pakistan The problem and danger for Punjabis and Pakistan are not Sindhis and Baloch, only Urdu-speaking Indian immigrants and Pathans. https://t.co/VwK3CMdsgG https://t.co/HYZViGRnEi	NIL	NIL	Hate
1573653192617127936	کیا کوئی عمرانڈوز یہ بتاسکتا ھے ہر اس دہشتگرد، ڈاکوؤں،قتل کا تعلق #کنجروں_کاٹولہ_PTI سے ہی کیوں نکلتاھے؟ اسے پہلےامین گنڈاپوری ایک خاتون پروفیسر کو دمھکی دے چکاھےاسکےخلاف کوئی قانون کاروائی نہیں ہوسکی کیونکہKPKمیں لاڈلےخان کی حکومت ھےکسی کی جرات نہیں خان کےشیرو پر کارروائی کرے۔ https://t.co/r5186Ne3sD	Can anyone tell us why all these terrorists, dacoits, murders are related to #Kanjarun_Katulah_PTI? Earlier, Amin Gandapuri had slapped a female professor, but no legal action could be taken against him because there is Ladley Khan's government in KPK, no one dares to take action against Khan. https://t.co/r5186Ne3sD	NIL	NIL	Hate
1566744442891010054	شعلہ بن کر پھونک دے خاشاک غیر اللہ کو خوف باطل کیا کہ ہے غارت گر باطل بھی تو #InsafReliefProgram https://t.co/XvNFFtuzHF	Become a flame and blow the Khashak other than Allah If fear is false, it is also false #InsafReliefProgram https://t.co/XvNFFtuzHF	کو ہے۱ مت ۹ وت سو ۔ و مقئقدتد	Who is 1 Don't 9 and sleep . And Muqiqadtad	No_Hate
1614560324669120514	واہ عمران خان واہ ایسا سرپرائز دیا کہ رجیم چینج کے خواب دیکھنے والوں کے اوپر سے نیچے تک سب کی لالو لال کرکے رکھ دی اس لفافے نے تو اپنی غلطیاں تسلیم کر لی ہیں مگر جو مرچیں پاٹواریوں کو لگی ہیں، اس کا اثر اگلے 5 سال تو نہیں جانے والا 😂 مولے نوں مولا نہ مارے تے مولا نہیں مردا https://t.co/W1FBXRsHip	Wow, Imran Khan, wow, he gave such a surprise that everyone, from the top to the bottom of the dreamers of regime change, made everyone blush. This envelope has admitted its mistakes. But the chillies that have hit the Patwaris, the effect of this will not go away for the next 5 years.	م۶ 72 ۰ ہم 7 20 'مرتے فلام پچاراواشیل عمران مان کے ہوتے ہو ۓے پاکتان 200 کنا کی لہ وہ ۸م اور گمسیٹت زہادہ ے۔۔ اں لیے پرہپیگینڈہ جار ی رکھو (آپ کا مجوڑا گیرڑ نواز ریف) / ۱ ٔ0۳03	M6 72 0 Hum 7 20 'Die Flam Pacharavasheel Imran Maan Pakatan 200 kana ki leh he is 8th and gumset zahada. So keep up the propaganda (Your composition Gerar Nawaz ref) / 1 ٔ0303	Hate
1617838481417580544	بے شرم عورت اس ملک کو تباہ کر کے رکھ دیا ہے یہ عوام اس بات کا شکریہ ادا کرے تم پٹھواریوں کا 😡🖐️ @MaizaHameedMNA @balochi5252 https://t.co/iWzaassfns	Shameless woman has destroyed this country, this people should thank you Pathwaris for this 😡🖐️ @MaizaHameedMNA @balochi5252 https://t.co/iWzaassfns	NIL	NIL	Hate
1608551282121535490	2022 تیزی سے گزر رھا اگر میری وجہ سے آپ کو کوئی تکلیف پہنچی تو ذرا سوچئے پہلے آپ نے ہی کوئی جھگڑا کیا ہو گا ورنہ میرے جیسا معصوم نیک با اخلاق بندا کسی کےساتھ ایسا کرےایسا ہو نہیں سکتا اگرسمجھدار ہیں تو مجھ سے معافی مانگ لیں میں آپکو معاف کردونگا کیونکہ دل کامیں بہت ہی اچھاہوں https://t.co/vEmKoaP2nl	2022 is going fast if you get hurt because of me Just think You must have had an argument before Otherwise, an innocent person with good morals like me should do this to someone. It cannot happen If you are wise, ask for my forgiveness I will forgive you Because my heart works very well https://t.co/vEmKoaP2nl	NIL	NIL	No_Hate
1564998424122261505	@hinaparvezbutt پرنسز شریف بھگوڑا گنجا سلانٹی کی امداد کرتے ہوئے۔ https://t.co/jZ5wvkNPhb	@hinaparvezbutt helping princes Sharif runaway bald Salanti. https://t.co/jZ5wvkNPhb	NIL	NIL	Hate
1561728471155593217	سیلاب زدہ علاقوں میں لوگ جانوروں سے بھی بدتر حالت میں مر رہے ہیں حکمران پکڑ پکڑائی سے ہی باہر نہیں نکل رہے۔ #بےحس_حکمران_ڈوبتی_عوام https://t.co/ccE4OJKsNi	People are dying worse than animals in flood affected areas and the rulers are not getting out. #भेश्स_हकमरान_दूबती_अवाम https://t.co/ccE4OJKsNi	NIL	NIL	No_Hate
1614982971894951939	مسلم لیگ ق کا اجلاس، چودھری پرویز الٰہی کی پارٹی رکنیت معطل کر دی گئی https://t.co/1uEiiJ3rZO https://t.co/np5YzL1Az9	PML-Q meeting, Chaudhry Pervez Elahi's party membership suspended https://t.co/1uEiiJ3rZO https://t.co/np5YzL1Az9	ٰ جچ ۹ ے ا ہے ۱ سی - 1 س	A Judge 9 A is 1 C- 1 s	No_Hate
1599005983233445890	@Ahmed_moosa1 @azizabadi @QasimalirazaAli @NdmEhsan ایک طرف ایجنسی اور دوسری طرف عمران خان کے اٹھاتا ہے یہ ۔ لفافہ خور ہے کنجر۔ پچھلے 35 سال سے تو یہی دیکھا کہ جو پاور میں ہوتا اُس کے پکڑ کر لٹک جاتا ہے https://t.co/pfZ5Y6GcCA	@Ahmed_moosa1 @azizabadi @QasimalirazaAli @NdmEhsan Agency on one side and Imran Khan on the other. Kanjar is a eater of envelopes. For the last 35 years, I have seen that whoever is in power gets hanged https://t.co/pfZ5Y6GcCA	NIL	NIL	Hate
1566531683100332033	@QayyumReports چوتیوں کیلئے 😂😂 https://t.co/TQwFzqdDcI	@QayyumReports for tits 😂😂 https://t.co/TQwFzqdDcI	NIL	NIL	Hate
1573961193626165248	کدھر مر گئے ہیں عمران قادیانی کے یار اب بولا مولانا طارق جمیل پر وہ بھی شہباز شریف کے لوگوں سے مل رہے ہیں @PTIofficial @TLP_Politics92 #PTIOfficial @pti_saeen #وزیراعظم_نہیں_لعنتی_اعظم https://t.co/ifkNwpk1Eb	Where have Imran Qadiani's friends died now, Maulana Tariq Jameel said, he is also meeting Shahbaz Sharif's people. @PTIofficial @TLP_Politics92 #PTIOfficial @pti_saeen #Prime_Minister_Not_Damn_Azam https://t.co/ifkNwpk1Eb	تی مسنتگا	T Musantaga	Hate
1579944764849651712	بلوچستان کے ضلع ڈیرہ بگٹی کی تحصل سوئی میں 70 گھروں کا تعمیراتی سامان تقسیم کردیا گیا۔ جبکہ 30 بیواؤں و مستحقین میں کیش بھی گھر بنانے کے لیے دے دیا گیا۔ الحمدللّٰہ امانتیں پہنچ رہی ہیں۔ https://t.co/MTaW5CsmPt	Construction materials for 70 houses were distributed in Dera Bugti district of Balochistan. While 30 widows and beneficiaries were given cash to build houses. Alhamdulillah, trusts are coming. https://t.co/MTaW5CsmPt	NIL	NIL	No_Hate
1574401162098667520	یہ سب بھی خواتین ہیں پاکستانیوں......... ان کا مریم اورنگزیب سے کوئی مقابلہ کیا جاسکتا ہے کیا؟؟؟ مریم اورنگزیب پر کوئی تشدد ہوا کیا جو اتنا شور مچا ہوا ہے؟ https://t.co/jfmlKSKrFb	All these women are also Pakistanis......... Can they be compared to Maryam Aurangzeb? Has there been any violence against Maryam Aurangzeb that has made so much noise? https://t.co/jfmlKSKrFb	NIL	NIL	No_Hate
1608020365145513984	_*ٹانک کو جرائم سے پاک کرنے کیلئے پولیس کا آپریشن کلین اپ کامیابی سے رواں دواں*_ _*1 اشتہاری سمیت 7 ملزمان گرفتار، 2 عدد کلاشنکوف اور 1060 گرام چرس برآمد*_ _*2 عدد بندوق اور 15 عدد کارتوس بھی برآمد کرکے مقدمات درج کئےگئے*_ https://t.co/VYHXwKXhiq	_*Police operation clean-up to clean Tank from crimes goes on successfully*_ _* 7 suspects including 1 advertiser arrested, 2 Kalashnikovs and 1060 grams of hashish recovered*_ _*2 guns and 15 cartridges were recovered and cases were registered*_ https://t.co/VYHXwKXhiq	NIL	NIL	No_Hate
1564037453048160263	فوٹو شاپ کی داد نہ دینا، معصوم دوستوں کے ساتھ ذیادتی ہوگی۔ 🫡😐 #AlkhidmatFloodRelief https://t.co/TGqJoNbMdT	Don't give photoshop credit, innocent friends will be abused. 🫡😐 #AlkhidmatFloodRelief https://t.co/TGqJoNbMdT	NIL	NIL	No_Hate
1578377428715687938	بھارتی دہشتگرد فوج کشمیری نوجوانوں کو بلاوجہ گرفتارکرنے لگی #Kashmiris_Demand_Right_To_Self-Determination https://t.co/C1n06LVrg6	Indian terrorist army started arresting Kashmiri youth without any reason #Kashmiris_Demand_Right_To_Self-Determination https://t.co/C1n06LVrg6	ار ٹی لیس نے شوپیان سے ایک نوج ا نگر فیا رک لیا	R T Lis from Shopian A young woman stopped	No_Hate
1568110840364023808	@MaleehaHashmey یہ اس باپ کی گندی اولاد ہے جو عورتوں کی عزت کرنا نہیں جانتا جس نے اپنی بیٹی کو بھی نہ چھوڑا ساری اولاد میں سے اس کو آگے کیا کہ اس کی بغیرتی کے قصے لوگ بھول نا جائیں بغیرت باپ کی بغیرت اولاد عورت پہ سیاست کرنے والے عورت کے پیچھے چھپنے والے ان مردوں کی مردانگی پہ لعنت ہو🖐️ https://t.co/trXnNosyOB	@MaleehaHashmey This is the dirty offspring of a father who does not know how to respect women He who did not even leave his daughter, put her ahead of all the children so that the stories of his absence should not be forgotten. Without a father, without children Curse the masculinity of these men who hide behind women who politicize women🖐️ https://t.co/trXnNosyOB	NIL	NIL	Hate
1581320373160669184	ڈپٹی کمشنر نارووال محمد شاہ رخ نیازی کی ضلع بھر کے چیف آفیسرز میونسپل کمیٹی سے میٹنگ۔ تمام سی او صاحبان کی جانب سے ڈپٹی کمشنر صاحب کو میونسپل کمیٹیز کے سٹاف،مشینری،ورکنگ اور ڈویلپمنٹ پراجیکٹ بارے تفصلی بریفنگ دی گئی۔ https://t.co/4HxLrp1xqk	Deputy Commissioner Narowal Muhammad Shahrukh Niazi meeting with District Chief Officers Municipal Committee. On behalf of all the COs, a detailed briefing was given to the Deputy Commissioner about the staff, machinery, working and development projects of the municipal committees. https://t.co/4HxLrp1xqk	NIL	NIL	No_Hate
1568133238392082432	@Skiper786 جیو نیوز کا اینکر بابرستار اسلام اباد ہائیکورٹ کا جج۔۔۔۔سمجھ تو گئے ہونگے۔۔ https://t.co/UEwGIfrRcT	@Skiper786 Geo News anchor Babarstar is a judge of Islamabad High Court. https://t.co/UEwGIfrRcT	NIL	NIL	Hate
1617617080919916544	@mjdawar حرامخوروں #PTM نقیب الله کی وجہ سے بنائی گئی تھی تاکہ اسکو اور باقی پشتونوں کو انصاف مل سکےلیکن آج کے فیصلے کےبعد تمہارا پھر بھی حکومت میں رہنا یہ ثابت کرتا ہے #NaqeebUllahMehsud بہانہ تھااصل نشانہ سیاست میں آنا تھا ڈوب کے مر جاو لعنتیوں @mjdawar @ManzoorPashteen @Gulalai_Ismail https://t.co/Dq8Aj7819V	@mjdawar حرامخورون #PTM was created because of Naqeebullah so that he and other Pashtuns can get justice but after today's decision you are still in govt it proves #NaqeebUllahMehsud was an excuse the real target was to enter politics Drown and die damned @mjdawar @ManzoorPashteen @Gulalai_Ismail https://t.co/Dq8Aj7819V	NIL	NIL	Hate
1593851235026747393	سچ سچ بتاؤ بیٹا جس گورے جج نے مجھے چور اور جھوٹا ثابت ہونے پر جرمانہ کرکے عالمی سطح پر ذلیل کیا تمھارے پاس اس کی واقع ہی کوئی ویڈیو نہیں یا اپنے ابا کی طرح چچا کو بھی ذلیل کروانا چاہ رہی ہو؟ https://t.co/v73pmMEdq0	Tell me the truth son, the white judge humiliated me on the world level by fining me for being a thief and a liar. You don't have any video of it, or are you trying to humiliate your uncle like your father? https://t.co/v73pmMEdq0	NIL	NIL	Hate
1580168663722004480	#آزادی_مارچ_کپتان_کے_سنگ واصف علی واصف کی ایک بات مجھے بہت پسند تھی وہ کہا کرتے تھے محبت میں غیر کی رائے لینا حرام ہے @TM__FLW https://t.co/c77fqIvotD	#Azadi_March_Captain_K_Sing I liked one thing of Wasif Ali Wasif, he used to say that it is forbidden to take other people's opinion in love @TM__FLW https://t.co/c77fqIvotD	۸)	8)	No_Hate
1566425523412148225	اسرائیل 🇮🇱 اور ترکی 🇹🇷 1997 سے آزاد تجارتی معاہدے میں جڑے ہیں ہزاروں اسرائیلی اور ترک کمپنیاں ہر سال اربوں ڈالر کی تجارت کرتی ہیں https://t.co/P5mvG9Cy23	Israel 🇮🇱 and Turkey 🇹🇷 have been in free trade agreement since 1997 Thousands of Israeli and Turkish companies trade billions of dollars each year https://t.co/P5mvG9Cy23	NIL	NIL	No_Hate
1562094960123559936	خدارا! "سیلاب میں بہتی لاشوں کو دفنانے کے لیے خشک زمین تک نہیں مل رہی"۔ 💔 مزید کیا درد سنو گے؟ تونسہ آج اتنا سیراب ہوگیا کہ مکینوں کی موت کا پیغام بن گیا ہے۔ اور موت بھی اتنی خطرناک۔۔۔ جو چاروں طرف سے حملہ آور ہے اور بچاؤ کا کوئی سامان نہیں ہے۔ https://t.co/BBTwvGAx87	God! "There is no dry land to bury the bodies in the flood". 💔 What more pain will you hear? Taunsa has become so waterlogged today that it has become a message of death for the residents. And death is so dangerous. Who is attacked from all sides and has no means of protection. https://t.co/BBTwvGAx87	بجی	bell	No_Hate
1606607968736264193	معروف کلائمبر صادق سدپارہ (بھائی حسن سدپارہ مرحوم) کا پاکستان مسلم لیگ ن سے دلی محبت کا اظہار 8035 میٹر بلند چوٹی G-II پر پارٹی پرچم لہرا کر محبت کا اظہار کیا https://t.co/cSJvXuBzpf	Renowned climber Sadiq Sadpara (brother of late Hasan Sadpara) expressed his heartfelt love for Pakistan Muslim League-N by hoisting the party flag on the 8035-meter peak G-II https://t.co/cSJvXuBzpf	NIL	NIL	No_Hate
1562713290295238656	حضرت مولانا ضیاء اللہ خان دیوبندی صاحب مہتمم دارلعلوم اسلام آباد سے بلال خان مروت صدر جمعیت طلباء اسلام اسلام آباد کی ملاقات حضرت نے پرتپاک استقبال کیا اور مبارکباد پیش کی https://t.co/vtgevg0HE2	Hazrat Maulana Ziaullah Khan Deobandi Sahib met with Bilal Khan Marwat, President of Jamiat-i-Islam Islamabad.	NIL	NIL	No_Hate
1577671100930166784	خوشدل شاہ بھائی کے ساتھ جو کچھ لاہور اسٹیڈیم میں ہوا یا کسی بھی پلیئر کو تحقیر آمیز جملوں سے نوازا گیا غلط کیا بجائے حوصلہ شکنی کرنے کے اس وقت حوصلہ دیتے تو شاید گراؤنڈ میں گیم پلٹ جاتی خیر خوشدل شاہ بھائی اللہ آپ کو کامیاب کریں آمین 🤲 @KhushdilShah_ @babarazam258 @iMRizwanPak @ https://t.co/8WTOL0ckpo	What happened to Khushdil Shahbhai in Lahore stadium or any player was awarded with insulting sentences, what is wrong, instead of discouraging, if you had encouraged at that time, maybe the game would have turned around in the ground. 🤲 @KhushdilShah_ @babarazam258 @iMRizwanPak @ https://t.co/8WTOL0ckpo	NIL	NIL	No_Hate
1581311796190752768	تمام جنگی پروپیگنڈا، ساری چیخ و پُکار، جھوٹ اور نفرت ہمیشہ اُن لوگوں کی طرف سے آتی ہے جو آپس میں خود نہیں لڑتے. ~جارج آرویل مترجم ~میاں وقار #اردو_زبان https://t.co/SB9Mobmpfx	All the war propaganda, all the shouting, the lies and the hatred always come from those who do not fight among themselves. ~George Orwell Translator ~ Mian Waqar #Urdu_language https://t.co/SB9Mobmpfx	NIL	NIL	No_Hate
1613893355687002115	یہ لڑکا ہے یا لڑکی تجربہ کی بنا پر روشنی ڈالیں اور چولیں مارنے سے گریز کر🤣🤣 https://t.co/RrY5ZMr6ZL	Is it a boy or a girl? Lighten up based on experience and avoid burning 🤣🤣 https://t.co/RrY5ZMr6ZL	NIL	NIL	No_Hate
1562822323971162118	اس وہابی مولوی جس نے مُحَمَّد ﷺ کی حدیث 2812 کو معاذاللہ کہا ہے اس نے مُحَمَّد ﷺ کی گستاخی کی ہے اسے فورا پکڑ کر عدالت سزا دے #ہشام_گستاخ_رسول_کوگرفتارکرو https://t.co/cohDl6vztO	The Wahhabi cleric who Muhammad ﷺ Hadith 2812 of Mu'adhullah has said that he has insulted Muhammad ﷺ and the court should arrest him immediately and punish him. #Hisham_Gastak_Rasoul_Koghartarkar https://t.co/cohDl6vztO	NIL	NIL	Hate
1587385450158866433	ٹیلر سوئفٹ کا تاریخی ریکارڈ، بل بورڈ ہاٹ 100 کی پہلی دس پوزیشنز پر قبضہ https://t.co/piafoUrlkV https://t.co/6iKa3uyVD6	Taylor Swift's historic record, occupying the first ten positions of the Billboard Hot 100 https://t.co/piafoUrlkV https://t.co/6iKa3uyVD6	NIL	NIL	No_Hate
1592149173427896320	تقریب سے خطاب کرتے ہوئے ڈاکٹر نسیم بلوچ نے کہا پاکستان بلوچ تحریک کو روکنے کے لیے وہ مظالم ڈھا رہا ہے جنھیں آج کی دنیا میں کوئی جائز قرار نہیں دے سکتا۔پاکستانی فوج مسلح افراد کو نشانہ نہیں بنا رہی بلکہ پورے بلوچ قوم کی نسل کشی کر رہی ہے۔ 4/4 https://t.co/h8jdZe1shg	Addressing the event, Dr. Naseem Baloch said that Pakistan is committing atrocities to stop the Baloch movement, which cannot be justified in today's world. is doing 4/4 https://t.co/h8jdZe1shg	13.۶۴ 009 *× ےے ۱۔. . 0	13.64 009 *× Hey 1. . 0	Hate
1563498783153205249	میرپورخاص تعلقہ شجاع آباد مین روڈ پر مقیم برسات متاثرین کو پاک فوج کی 22 بلوچ ریجمینٹ کی جانب ریلیف کا سامان تقسیم کیا گیا۔ #PakistanArmyZindabad ✌🇵🇰✌ https://t.co/8FkRsG12gD	22 Baloch Regiment of Pakistan Army distributed relief goods to the rain victims living on Shujaabad Main Road in Mirpurkhas Taluk. #PakistanArmyZindabad ✌🇵🇰✌ https://t.co/8FkRsG12gD	NIL	NIL	No_Hate
1580869993017016320	ہیرا منڈی سے یاد آیا سنا ھے جس دن سے اس نے جنوبی پنجاب میں اپنا کوٹھا چھوڑا ھے ، اس کے نیچے کام کرنے والی 300 سے زیادہ لڑکیاں در بدر ھو گئی ہیں ، ہر وقت اس کو یاد کرتی ہیں اور ایک ھی بات کرتی ہیں باجی کاش تو اپنے مرید کے ساتھ نا بھاگتی ، تیرے بھاگنے کے بعد سارا دھندہ چوپٹ ہوگیا https://t.co/b2c0zD1EWH https://t.co/W0Aod6hI6C	Remembered from the diamond market It has been heard that since the day he left his hut in South Punjab, more than 300 girls who worked under him have been expelled. Don't run away, after you run away, the whole business is broken https://t.co/b2c0zD1EWH https://t.co/W0Aod6hI6C	NIL	NIL	Hate
1577539760469331968	پیرنی سے زیادہ محنتی عورت میں نے آج تک نہیں دیکھی۔۔ گھوڑی بن بن کر اور تعویز گنڈوں کی کمائی کے بعد جب چتو شوہر کے دو لاکھ ماہانہ تنخواہ سے بھی گزارہ نہ ہوا تو ہولسیل پر ”پھدیاں“ سپلائی کرنی شروع کردی 😏 https://t.co/2rarUHgdBm	I have never seen a more hardworking woman than Pirni. After becoming a mare and earning money from gangsters, when Chattu could not survive on her husband's monthly salary of two lakhs, she started supplying "Phadiya" on wholesale 😏 https://t.co/2rarUHgdBm	NIL	NIL	Hate
1566701198866059266	کیا عسکری لیڈر شپ ایسی ہوتی ہے جو ایک خط پر رجیم چینج کردے،پھر سوال کرنے والوں پر تشدد،اغواء گردی،میڈیا کی بندش کردے،گیمز آف ڈالرز کے لئے پورے ملک کو داو پر لگادے ؟ آرمڈ فورسز کی جانیں بھی بزدل جرنیلوں کی پالیسیوں کے باعث قربان ہوتی ہیں۔۔ چیف جسٹس عوامی عدالت https://t.co/jupdiiNz4p	Is the military leadership the kind that changes the regime on a letter, then tortures those who ask questions, kidnaps, shuts down the media, puts the whole country at stake for games of dollars? The lives of armed forces are also sacrificed due to the policies of cowardly generals. Chief Justice Public Court https://t.co/jupdiiNz4p	کیا پولیٹیکل لیڈرشپ اس طرح ہوتی ہے, گیم آف تھرون زکیلئے ہرچی زکواسٹیک پرلگا دیا جاتا ہے؟ آرمڈ فورسزہمارے لیے جان قربان کرتے	Is political leadership like this, game? Everything would have been put to the off-throne is Armed forces would sacrifice their lives for us	Hate
1578358822225469440	فلش پر پاؤں کے بل بیٹھ کر آدھی شلوار اتار کر ٹٹی کر لینے کے بعد بھی اسی جگہ پہ موبائل ہاتھ میی پکڑ کر بیٹھے رہتے ہو کیسے کر لیتے ہو؟ #mentionyourfriend https://t.co/nfiIxogSNU	How do you sit cross-legged on the floor and hold your mobile phone in the same place even after taking off half of your shalwar? #mentionyourfriend https://t.co/nfiIxogSNU	NIL	NIL	No_Hate
1578756169924939776	راناثنااللہ تیری عظمت کو سلام .رانا ثناءاللہ زندہ باد ببر شیر عمران نامی فارن فنڈڈ فتنہ ایک بار پھر دارالحکومت میں فساد مچانے آنا چاہتا ہے۔ یہ فتنہ حکومت میں ہو یا اپوزیشن میں ملک کو نقصان پہنچانے کے مشن پر رہتا ہے۔ قوم @RanaSanaullahPK کے ساتھ کھڑی ہے https://t.co/eeBrKZGkpr	Salutations to your majesty .Rana Sanaullah Long Live Babbar Sher A foreign-funded miscreant named Imran wants to come to the capital once again to wreak havoc. This temptation, whether in the government or in the opposition, remains on a mission to harm the country. Nation stands with @RanaSanaullahPK https://t.co/eeBrKZGkpr	NIL	NIL	Hate
1598943030568169473	نیو سرجری ہو گی ہیں اب نیو ٹوپی ڈرامہ شروع ہو گا 😀😀 https://t.co/6ig2iyBCDm	New surgery will be done Now New Topi drama will start 😀😀 https://t.co/6ig2iyBCDm	NIL	NIL	Hate
1562125674579726336	پاک فوج کی جانب سے سیلاب سے متاثر بلوچی گلوکار ویاب بگٹی کے مدد کے لئے پہنچ گئے ۔ #ServingBalochistantogether #WahabBugti https://t.co/b1NJl64HVv	The Pakistan Army reached out to help flood-affected Balochi singer Vyab Bugti . #ServingBalochistantogether #WahabBugti https://t.co/b1NJl64HVv	NIL	NIL	No_Hate
1578774419761045504	@MaryamNSharif کھوتا اور کھوتے کی بچی https://t.co/MuKnkKest5	@MaryamNSharif Khota and Khota's baby https://t.co/MuKnkKest5	خواز کر لبپاڑے	Khwajakar Lippade	Hate
1578009884028608513	پاکستان سے بات نہیں کرنا چاہتا، پاکستان نے یہاں دہشت گردی پھیلائی ہے، انہوں نے کشمیر کے لیے کیا اچھا کیا ہے؟ امیت شاہ Visit us: https://t.co/F0tnn7cfob #mohbad #India #KashmirRejectsIndia #inqalabpk https://t.co/s6ZiAdRwk1	I don't want to talk to Pakistan, Pakistan has spread terrorism here, what good have they done for Kashmir? Amit Shah Visit us: https://t.co/F0tnn7cfob #mohbad #India #KashmirRejectsIndia #inqalabpk https://t.co/s6ZiAdRwk1	90 ہے جھ 0 سال سے یہاں علوم ت کر رے تھے وہ بے مشورے دے رے ہیں ء لن صا فکہہ دول پاکنتان کے مات ھکوکی بات یت نی ہوگی تار وزبم والہ	90 is He was studying here for 10 years They are giving advice without advice It will be a matter of Pakistan's defeat Wire bomb	Hate
1581544706055413761	تاریخ گواہ ہے کہ پاکستان پر جب بھی کوئی برا وقت آیا (چاہئے وہ قدرتی آفات یا اندرونی و بیرونی دشمن) افواج پاکستان نے ملکی سالمیت کی خاطر ہر قربانی کو ہنس کر گلے لگایا ہےتبھی تو اب بھی ہماری طرح ہمارے بچے فوجی جوان کو دیکھ کر سلوٹ مارتے ہیں۔ #OurArmyOurPride https://t.co/Sd2mIqXlwg	History is a witness that whenever a bad time has come upon Pakistan (be it natural calamities or internal and external enemies), Pakistan forces have laughed and embraced every sacrifice for the sake of the country's integrity. Hit the salute. #OurArmyOurPride https://t.co/Sd2mIqXlwg	NIL	NIL	No_Hate
1566334769021034497	یہ تصویر انڈیا میں کریلا کے اندر رہنے والی سائز میں تھوڑی سے بڑی گلہری 'مالابار' کی ہے۔ یہ گلہری نا صرف دیکھنے میں خوبصورت ہے بلکہ اس کی عادات بھی کچھ مختلف ہیں ۔ یہ گلہری آپنی خوراک کو زمین میں دبانے کی بجائے درختوں کی اونچی شاخوں کے تنوں پر اکٹھا کرتی ہے۔ https://t.co/yIEruJEDEX	This photo is of a slightly larger squirrel 'Malabar' living in Kerala, India. This squirrel is not only beautiful to look at, but its habits are also somewhat different. Instead of burrowing into the ground, this squirrel collects its food on the trunks of tall tree branches. https://t.co/yIEruJEDEX	NIL	NIL	No_Hate
1593253500032778240	بنی گالہ میں بلدیاتی الیکشن کے حوالے سے پی ٹی آئی نامرد کارکن الیکشن کمپین میں مصروف عمل اللہ پاک ہمیں ⅓ ایک تہائی واپس لائے گا https://t.co/WUibp2Z0n2	Regarding the local body election in Banigala, PTI incompetent workers are engaged in election campaign May Allah bring us back ⅓ one third https://t.co/WUibp2Z0n2	NIL	NIL	No_Hate
1587750217532710915	😛😝 ان سے مل رہا ہے جو اپنے کرپٹ حکمرانوں کو گولی مار دیتے ہیں https://t.co/PQ4x6ZJUX0	😛😝 They are meeting their corrupt rulers Shoot https://t.co/PQ4x6ZJUX0	NIL	NIL	Hate
1563825732492705798	مثال مشہور ھے کہ یوتھ رے یوتھیا تیری کونسی گال سیدھی دوسری کہاوت ھے کہ یوتھیا کی ماں کب تک ڈھول بجائے گی https://t.co/0bNAa1yHCK	The example is famous Youth Ray Euthia Thy which cheek is straight Another saying is that How long will Yuthia's mother play the drums https://t.co/0bNAa1yHCK	می	Me	Hate
1616812412958658567	مراد واشل بیچارہ اسی وجہ سے تو کھڈے لائن لگا ہوا ہے نیازی سے اب جاکر معلوم ہوا 😜 ویسے ایک بات قابل غور ہے ان دونوں کی لیفٹ سائیڈ کی آنکھیں کیوں چندھیائی ہوئی ہیں 🤔 https://t.co/G1qTSqZWDc	Poor Murad Vashal, that's why there is a line drawn from Niazi Now it is known By the way, one thing is worth considering, why are the left side eyes of both of them scarred 🤔 https://t.co/G1qTSqZWDc	NIL	NIL	Hate
1573231335002574851	انجیلینا جولی کا ظاہر و باطن ایک ہے۔ مولانا کے فولورز #روئیں_چیخیں_پیٹیں ان کی منافقت پر۔ https://t.co/vQjswFTVau	Angelina Jolie looks and feels the same. Maulana's followers #cry_shout_out their hypocrisy. https://t.co/vQjswFTVau	NIL	NIL	No_Hate
1578764640804540417	بھائی صاحب یہ @JangUrdu بھی #ARY کی طرح سندھ کے خلاف جھوٹا پروپیگنڈا کر رھا ھے عمران کو لانچ کر کے ملک کا بیڑہ غرق کیا اب فیک ڈرامے بازیاں کرتے ھو ـــــــــــــــــــــــــ ھیں تم کو خوف خدا نہیں #Pakistan @HamidMirPAK @SaleemKhanSafi @AajKamranKhan @MediaCellPPP @soulat_pasha https://t.co/sVQV6DoCcK	Brother, this @JangUrdu is also doing false propaganda against Sindh like #ARY, launched Imran and sunk the ship of the country. #Pakistan @HamidMirPAK @SaleemKhanSafi @AajKamranKhan @MediaCellPPP @soulat_pasha https://t.co/sVQV6DoCcK	NIL	NIL	Hate
1581229404864512003	@geonews_urdu اس نے بیچ دیا سارا ایٹمی طاقت والا فارمولا سعودیہ کو سعودیہ چوتیا تو نہیں جو اسے دس ارب ریال دیے کاروبار کرنے کو لنڈن میں اور ہان راحیل شریف کے پاس کیا تہا ایسا جو مشرف کے پاس نہ تہا سب کے پاس ایٹمی اثاثوں کی معلومات تہیں جو اب سعودیہ کے پاس ہیں اب خالی بندوق سے کیونکر ڈرے بہارت https://t.co/ystYORGwpR	@geonews_urdu He sold all the nuclear power formula to Saudi Arabia, Saudi Arabia gave him 10 billion riyals to do business in London and did it with Raheel Sharif, which Musharraf does not have, everyone has information about nuclear assets. Layers that are now with Saudia, how can Bharat fear with an empty gun https://t.co/ystYORGwpR	NIL	NIL	Hate
1562824068390604802	پہلے ہم سنتے تھے لڑکی گھر سے فرار ہوگئی اپنے یار کیساتھ لیکن پہلے بارسناہے نیازی نے برقع پہنا اور فرار ہوا مرادسعید عرف وارشل کیساتھ توبہ توبہ🤣🤣🤣🤣 #یہودیوں_کا_بچہ_عمران https://t.co/ZKwlkaPeFU	Earlier we used to hear that the girl ran away from home with her boyfriend But first Barsenahe Niazi wore a burqa and escaped with Murad Saeed aka Warshal repented 🤣🤣🤣🤣 #Jewish_child_imran https://t.co/ZKwlkaPeFU	NIL	NIL	Hate
1566421876473225217	اسرائیل کی متوقع کرکٹ ٹیم کے کوچ۔ #شلوار_الٹی_ھی_تھی https://t.co/Cu4LB57gqc	The coach of the prospective cricket team of Israel. #Shalwar_alti_khai_thi https://t.co/Cu4LB57gqc	NIL	NIL	Hate
1578067563132514304	اکثر لوگ گیس کی وجہ سے پیٹ درد کی شکایت میں مبتلا رہتے ہیں۔ اس کے لیے کالا زیرہ مفید ہے۔ * کالے زیرے کو پیس لیں ۔ * پھر گرم پانی میں شامل کر کے پئیں ۔ * گیس کی شکایت دور ہوجائے گی ۔ * ساتھ ہی جگر، پتے کے لیے بھی بے حد مفید ہے ۔ https://t.co/gCV6RaZQm0 https://t.co/d5346Lvwu0	Many people suffer from stomach pain due to gas. Black cumin is useful for this. * Grind the black cumin seeds. * Then add it to hot water and drink it. * Gas ​​complaints will be removed. * It is also very useful for the liver and gall bladder. https://t.co/gCV6RaZQm0 https://t.co/d5346Lvwu0	NIL	NIL	No_Hate
1614450528309616641	سعودی عرب کے قدیم کنویں جن کے بارے میں کئی کہانیاں مشہور ہیں #UrduNews #SaudiArabia تفصیلات: https://t.co/QiSZE5grZV https://t.co/N0CcUH91Je	The ancient wells of Saudi Arabia about which many stories are famous #UrduNews #SaudiArabia Details: https://t.co/QiSZE5grZV https://t.co/N0CcUH91Je	سعود یی عرب کے قدیم کنویں جن کے	Saud Yes Arab The ancient wells of	No_Hate
1567225198176534528	@NazirLeghari نذیر لغاری تم بلوچ نہیں کوٸی موچی ، پولی ہو آج پتہ چلا اگر تھوڑی بہت غیرت باقی ہے تو یہ تصویر دیکھ لو پیسہ لے کر ٹویٹ کرنا ہر کسی کو آتا ہے لیکن غیرت کسی کسی کو آتی ہے https://t.co/cfRrCJ3TZz	@NazirLeghari Nazir Leghari, you are not a Baloch, you are a cobbler, you are a poly, I found out today If you have a little bit of honor left, look at this picture Everyone can tweet for money, but only someone can get honor https://t.co/cfRrCJ3TZz	NIL	NIL	Hate
1568948874517118976	متحدہ قومی موومنٹ پاکستان رکن قومی اسمبلی صابر قائمخانی بھائی, بھٹائی ٹاؤن انچارج اکرم مغل بھائی واراکین ٹاؤن کمیٹی, حق پرست امیدوار چیئرمین یونس بھائی، ایکس ایچ ڈی اے محمد علی بیگ أجالا پمپنگ اسٹیشن پر 50 آر پی ایم کی موٹر سٹارٹ کرنے کی ہدایت کرتے ہوئے. https://t.co/jWaXJrkBaD	Muttahida Qaumi Movement Pakistan Member National Assembly Sabir Qaimkhanibhai, Bhitai Town in-charge Akram Mughalbhai Warakin Town Committee, rightist candidate Chairman Younisbhai, XHDA Muhammad Ali Baig instructing to start 50 rpm motor at Ajala pumping station. happened https://t.co/jWaXJrkBaD	NIL	NIL	No_Hate
1564835062725726208	ڈوب مرو پاکستانیوں جنکی نسل کشی کی تھی وہ اب امداد دے رہے ہیں تمیں https://t.co/0K6LrphC3N	Drown Pakistanis Those who committed genocide are now helping you https://t.co/0K6LrphC3N	لاد می کا پاکستان کے سیلاب متاشری نکیل امدادی سامان ج ےکاعلان	Ladmi's Pakistan flood relief officer Nikil Imdadi Goods declaration	Hate
1587605118157037572	دو اہم خبریں ،،، کنٹینر پر سوار شاہ محمود قریشی کا سر فلائی اوور سے ٹکرا گیا ، گوندلانوالہ چوک میں جلسہ گاہ کے قریب سے نامعلوم شخص کی نعش ملی ہے https://t.co/QLm792IQst	Two important news, Shah Mehmood Qureshi's head on the container hit the flyover, the body of an unknown person has been found near the meeting hall in Gondlanwala Chowk https://t.co/QLm792IQst	NIL	NIL	No_Hate
1581318686727491584	@pmln_org شیر کے نشان پر موہر لگائیں. پاکستان کو مزید برباد اور رسوا کروائیں جو شیر وقت پڑھنے پر کبھی سعودیہ اور کبھی لندن بھگ جائیے وہ گیدر سے بھی بدتر hay بلے پر ٹھپا لگیں پاکستان کو خدار, آزاد اور باعزت بنایئں . شیر وہ ہوتا ہے جو اپنی قوم کے ساتھ کھڑا ہوجایے ووٹ صرف بلے اور کپتان کے https://t.co/t1t6zkUbUr	@pmln_org stamp the lion sign. Make Pakistan more ruined and humiliated Those who run away to Saudi Arabia and sometimes to London after studying for a long time are worse than Gaidar Stop on the bat and make Pakistan free and honorable. A lion is one who stands with his people Votes for bat and captain only https://t.co/t1t6zkUbUr	NIL	NIL	Hate
1561806903709208576	@mariyaaofficial یہ خسرا پاگل ہو چکا ہے https://t.co/BSKx4YCWtt	@mariyaaofficial This measles gone mad https://t.co/BSKx4YCWtt	NIL	NIL	Hate
1578051721275883521	قومی اسمبلی کے حلقہ این اے 22 کے امیدوار عبدالواسع افضل امام کالونی پٹ بابا تخت بھائی میں انتخابی مہم کے سلسلے میں منعقدہ کارنر میٹنگ سے خطاب کررہے ہیں۔ اس موقع پر نائب امیر صوبہ مولانا تسلیم اقبال، سابق امیر ضلع مولانا ڈاکٹر عطاء الرحمٰن، امیر جماعت اسلامی پی کے 54 نعمان یوسف، https://t.co/2C5KCjL64X	National Assembly Constituency NA-22 candidate Abdul Wasi Afzal Imam is speaking at the corner meeting organized in connection with the election campaign in Pat Baba Takhtbhai Colony. On this occasion, Naib Amir Province Maulana Taslim Iqbal, former District Amir Maulana Dr. Attaur Rehman, Amir Jamaat-e-Islami PK 54 Nauman Yusuf, https://t.co/2C5KCjL64X	NIL	NIL	No_Hate
1578056066956464129	@Atifrauf79 حکیم رانا ثناء اللہ یوتھیا/ عمرانڈو سپیشلسٹ 😎 #رندا_تیار_ہے https://t.co/QcRfwo4byM	@Atifrauf79 Hakeem Rana Sanaullah Uthia/Omrando Specialist 😎 #rinda_tiyar_hai https://t.co/QcRfwo4byM	NIL	NIL	Hate
1573220878543998980	یہ ہے سینئر صحافی ایاز امیر کا بیٹا اور ایک سفاک قاتل جس نے اپنی بیوی کو بے رحمی سے قتل کیا ہے یہ سو کالڈ سینئر صحافی اگر سارا وقت سیاستدانوں پر کیچڑ اچھالنے اور جھوٹے الزامات لگا کر کردار کشی کی بجائے اگر تھوڑا وقت اپنی اولاد کی تربیت پر لگائیں تو ایسے واقعات ہی نہ ہوں 😏 https://t.co/AkJl7bMOGQ	He is the son of senior journalist Ayaz Ameer and a brutal killer who brutally murdered his wife If these so-called senior journalists spend a little time on training their children instead of throwing mud at politicians and making false accusations, then such incidents would not have happened 😏 https://t.co/AkJl7bMOGQ	NIL	NIL	No_Hate
1617204324785856520	ایک سچ کو چھپانے کے لیے ہم ایک جھوٹ بولتے ہے پھر اس جھوٹ پر قائم رہنے کے لئے ہم ایک سو ایک جھوٹ بولتے ہے اس لیے وہ ایک کڑوا سچ ہی اچھا ہے چاہے وہ رشتہ قائم رہے یا نہ رہے لیکن آپ اپنے ضمیر کی عدالت میں مطمئن ضرور رہ سکیں گے ۔ 🙃 #بلوچ_زادی https://t.co/rg3fLkhNzg	We tell one lie to hide a truth, then we tell a hundred and one lies to stick to that lie, so it's a bitter truth, whether the relationship lasts or not, but you are in the court of your conscience. You will definitely be satisfied. 🙃 #Baloch_Zadi https://t.co/rg3fLkhNzg	NIL	NIL	No_Hate
1580139371512365056	🔴 شیخ اابراہیم زکزاکی: ریاض نے امریکہ اور برطانیہ کے حکم پر زاریا میں قتل عام کروایا۔ نائیجیریا کے سب سے سینئر مسلمان عالم شیخ ابراہیم الزکزاکی نے العالم نیوز نیٹ ورک کو انٹرویو دیتے ہوئے کہا کہ "ہم سمجھتے ہیں کہ سعودی عرب اس قتل عام کا اصل ذمہ دار نہیں تھا البتہ (1/5) https://t.co/EkHV8dWnyD	🔴 Sheikh Ibrahim Zakzaky: Riyadh massacred in Zaria on the orders of America and Britain. Sheikh Ibrahim al-Zakzaky, Nigeria's most senior Muslim scholar, said in an interview with Al-Alam News Network, "We believe that Saudi Arabia was not responsible for the massacre. (1/5) https://t.co/EkHV8dWnyD	الشیخ ابراھیم الزکزاکی زعیم الحرکۃالإسلامیۃ في نیجیریا	Al-Sheikh Ibrahim al-Zakzaky Leader of Islamic Movement in Nigeria	No_Hate
1598887513568923649	کبھی تاریک راتوں میں کوٸ جگنو چمکتا سا کہیں پہ تم نے دیکھا ہے مرا محبوب ایسا ہے کبھی روشن کبھی مدھم کبھی شعلہ کبھی شبنم کہیں پہ گرم چادر سا کہیں پہ برف جیسا ہے مرا محبوب ایسا ہے #قومی_زبان https://t.co/LL1Hae8rao	Sometimes in dark nights A light shines Somewhere you have seen My beloved is like that ever bright Sometimes dim Sometimes a flame Sometimes dew A warm blanket somewhere It is like snow somewhere My beloved is like that #National_Language https://t.co/LL1Hae8rao	NIL	NIL	No_Hate
1564254891970789378	وہ دور جب پاکستان کی تباہی کی بنیادیں رکھی جا رہی تھیں. https://t.co/d65JejLglf	The period when the foundations of the destruction of Pakistan were being laid. https://t.co/d65JejLglf	وی 0 30 کس ْ 1 ارت 0 ےت کے 7 ‎٢‏ 0 6 لان	V 0 30 Kis 1 means 0 7 of 2 0 6 lawns	Hate
1572781329309220864	خواہشں سے نہیں گرتے پھل جھولی میں وقت کی شاخ کو میرے دوست ہلانا ہوگا کچھ نہیں ہوگا اندھیروں کو برا کہنے سے اپنے حصے کا دیا خود ہی جلانا ہوگا #Zk9 https://t.co/cOia9IxRn0	Fruits don't fall from desires, the branch of time has to be shaken in the cradle, my friend, nothing will happen. #Zk9 https://t.co/cOia9IxRn0	NIL	NIL	No_Hate
1608651908536991746	اس گاڑی سے اتر کر یہ بھوتنی کا کسی پروگرام میں سادگی سے زندگی گزارنے پر کوئی پھدا لیکچر جھاڑنے جا رہا ہوگا 🤣 https://t.co/QFX2kwiPK1	After getting out of this car, this Bhutani is going to give a lecture on living a simple life in some program 🤣 https://t.co/QFX2kwiPK1	NIL	NIL	Hate
1568944729320226817	نوآبادیاتی استحصال، غلامی اور لوٹ مار کی علامت ہیں ملکہ الزبتھ: دیپانکر بھٹاچاریہ https://t.co/gRAa31wev2 https://t.co/Q5xGZrnf5O	Queen Elizabeth is a symbol of colonial exploitation, slavery and looting: Dipankar Bhattacharya https://t.co/gRAa31wev2 https://t.co/Q5xGZrnf5O	NIL	NIL	No_Hate
1576798261381582848	جتنے چکر نیا آرمی چیف لگانے کی اجازت کے لئے امریکہ لگائے جا رہے ہیں پاکستانیوں ڈرو اس وقت سے جب بچہ پیدا کرنے کا NOC اجازت نامہ بھی امریکہ سے لینا پڑے گا اگر حاجی صاحب کو ایکسٹینشن مل گئی تو مردے کو دفنانا ہے یا جلانا ہے اس کی بھی اجازت امریکہ سے لینی ہوگی؟ #فیصلہ_عوام_کرے_گی https://t.co/BGwcpdeDdT	As many rounds are being made by the US for permission to install a new army chief, Pakistanis should be afraid from this time When the NOC permission to give birth will also have to be taken from the US, if Haji Sahib gets an extension, should he bury or cremate the dead, he will also have to take permission from the US? #Faisal_Awam_Kre_Gi https://t.co/BGwcpdeDdT	NIL	NIL	Hate
1560667779828658177	@SaniaaAshiq ہیرامنڈی کی رنڈی https://t.co/MT63CFGE5d	@SaniaaAshiq Hiramandi's Randi https://t.co/MT63CFGE5d	NIL	NIL	Hate
1579732028077273089	بولنگ چلی نہ بیٹنگ، نیوزی لینڈ نے پاکستان کو 9 وکٹوں سے ہرا دیا، سہ ملکی ٹی ٹوئنٹی سیریز کے چوتھے میچ میں نیوزی لینڈ نے پاکستان کو تمام شعبوں میں چت کردیا، 131 رنز کے ہدف کے تعاقب میں نیوزی لینڈ کی پہلی وکٹ 117 رنز پر گری https://t.co/2gIXfhxvn4	Bowling did not work or batting, New Zealand defeated Pakistan by 9 wickets, in the fourth match of the tri-nation T20 series, New Zealand defeated Pakistan in all areas, in pursuit of the target of 131 runs, New Zealand's first wicket was 117 runs. Dropped at https://t.co/2gIXfhxvn4	۲	2	No_Hate
1578643178345082880	یہ ھے وہ حرام زادہ بدنسل اور راشی بیغیرت اس کے ھمنواہ قوال جن کی وجہ سے پاکستان اور اس میں رھنے والے عوام آج اس حال میں ھیں😊 https://t.co/HgPYk4gRBx	This is the haram zada Badnasl and rashi beghirat his fellow Qawwals because of which Pakistan and the people living in it are in this situation today 😊 https://t.co/HgPYk4gRBx	NIL	NIL	Hate
1581306597057343490	بدترین ہے وہ شخص جو دو انسانوں کے درمیان نفرت پیدا کرے https://t.co/bxzPb61xPE	Worst is the person who creates hatred between two people https://t.co/bxzPb61xPE	بدتڑین سے وہ تس جو دو انسانوں کے درمان 771	Those two people who are evil Treatment 771	No_Hate
1563510999986376707	ہمارا مسئلہ ابھی تک آزادی ہے انڈیا ترقی کے لیے کوشاں ہے تصویر: ٹرمپ ٹاور انڈیا https://t.co/sEOgvx6Xmy	Our problem is still independence India is striving for development Photo: Trump Tower India https://t.co/sEOgvx6Xmy	NIL	NIL	No_Hate
1593198389982031872	حقیقی آزادی مارچ اسلام آباد پہنچے تو اتنی دنیا نکلے کہ یہ 100 یا 200 لوگ جنہوں پاکستان کو جہنم بنایا ان کو نشان عبرت بنا دیا جائے۔ #وطن_کا_رکھوالا_عمران_خان https://t.co/gBRxmh2oOq	When the real freedom march reaches Islamabad, so many people come out that these 100 or 200 people who made Pakistan hell should be made a lesson. #Watan_Ka_Rakhwala_Imran_Khan https://t.co/gBRxmh2oOq	جوا ‏ تفق اڈ اگ خریک میں فو گمارے بت ڈ گرا انگ شان چا کے ہرس ژں	Gambling is not a good idea Fallen Shan Cha's horse	Hate
1579561309594845185	تیزاب سے چہرہ مسخ کرنے والوں کس منہ سے انسانیت کی بات کرتے ہیں انسانیت کے دعویدار نوٹ ، یہ لاش گزشتہ چار دن سے تربت کے اسپتال میں پڑی ہوئی ہے پہچان کے لئے اس حالت میں کون پہنچانے کا ۔ قابض ڈر پھیلانے کے لئے اکثر ایسی حرکتیں کرتا ہے مگر بلوچ تماری درندگی سے نہیں ڈرتے https://t.co/7hTRkEfw5a	From what mouth of those who mutilate the face with acid Claimants of humanity talk about humanity Note, this body has been lying in the Turbat hospital for the last four days for identification. Occupiers often do such actions to spread fear, but Baloch are not afraid of your brutality https://t.co/7hTRkEfw5a	NIL	NIL	Hate
1579508359501225986	سوات میں دہ شت گردی اور سکول کے بچوں پر حملہ کے بعد منظور پشتین نے کل سوات میں احتجاجی مظاہرہ کرنے کا اعلان کر دیا__! #PashtunLivesMatter https://t.co/ilzmYtnKeN	After terrorism and attack on school children in Swat, Manzoor Pashteen announced to protest in Swat yesterday! #PashtunLivesMatter https://t.co/ilzmYtnKeN	NIL	NIL	No_Hate
1564214938754760705	@SabirMehmood26 ہنس ایسے رہا ہے جیسے گونگی لن کے دیکھ کے ہنستی ہے 😂😜 https://t.co/ct0jIbabTm	@SabirMehmood26 laughs like dumb lin laughs 😂😜 https://t.co/ct0jIbabTm	NIL	NIL	Hate
1614473777894821888	کیا ڈوب مرنے کا مقام نہیں https://t.co/w9awfHjOL6	Isn't drowning a place to die https://t.co/w9awfHjOL6	NIL	NIL	No_Hate
1573633468776550401	@MianNawaz_MNS اس بگوڑے کو ہم اس پر پھانسی کئ پھندے میں دیکھنا پسند کرتے ہیں ان جیسے بغیرتو سے پاکستان کو صاف کرنے کا وقت ہوا چاہتا ہے یہ سب امریکہ کے پالتو کتے ہیں یہ ہیرا منڈی کے دلال ہیں غدار وطن ہیں یہ سب چوتیا خاندان ہیں اس بار ہم انکو جوتے مارنے ان کو ننگا کرینگے ان کے گانڈ میں مرچ ڈالنگے https://t.co/IaREsFHNTD	@MianNawaz_MNS We like to see this scumbag hanged in a noose. It's time to clean Pakistan from people like them. They are America's pet dogs. They are diamond brokers. They are traitors to the country. They are all Chautiya families. This time we will kick their shoes and strip them naked and put pepper in their ass https://t.co/IaREsFHNTD	1 .,پں .2002 ک کان نے چو ر کو پک کے من ڈکر دی سے	1., p. 2002 Ka Kaan has picked up the thief	Hate
1580906807513735170	قادیانی ملک و ملت کے غدار ہیں اسلام سے خارج اور مرتد ہیں مفکر اسلام مفتی محمود پاکستانی قوم تیرے روشن کردار کو سلام کرتی رھے گی #MuftiMahmood https://t.co/obqnb3QbFQ	The Qadiani are traitors to the country and nation, they are excluded from Islam and apostates Islamic thinker Mufti Mahmood Pakistani nation will continue to salute your bright character #MuftiMahmood https://t.co/obqnb3QbFQ	و	And	No_Hate
1564211140858626048	@DrDanish5 مجھے صرف اتنا کہنا ہے ایک قلم فروش صحافی،ایک جسم فروش طوائف سے زیادہ بدکردار ہوتا ہے جسم فروش طوائف صرف اپنا جسم بیچتی ہے جبکہ قلم فروش صحافی صرف اپنا قلم نہیں،قوم کے اجتماعی شعور کا سوادا کرتا ہے✍️ https://t.co/kuND6zD9eC	@DrDanish5 That's all I have to say A pen-selling journalist, a prostitute is worse than a prostitute A prostitute sells only her body While the pen seller journalist not only his pen, but the collective consciousness of the nation ✍️ https://t.co/kuND6zD9eC	فان کے ایگ اغبل میس عالھی چورو ںکی تسوریں م ہلک ہونوازشریف نے پاککتا نکانام دوش نکردیا تر الیگ اور مرعلہپوراہوا, نوز شریف شکرے ‎۱٥٢٢ ٥0٥17201۲ 5+۵۸۸۱۷6 ۳۴‏ ۱51۲۵۸۷'5ك۶۸۸.	Fawn's Egg Agbul Mess Alhi Thieves Concepts M. Halak Honwaz Sharif did not dosh Pakkata Nikanam Tar Alig and Muralah Purahwa, Nooz Sharif Shukre 1522 505172012 5+588176 34 1512587'5K688.	Hate
1573208010008190977	پہلے وقتوں میں گدھابہت بدنام تھاہرکوئی اس پربات کرتا۔مگر جب سےملحدین نےخود کو بندر کہناشروع کیا ہےتب سے بندر بیچارے کی اتنی بے عزتی ہوئی جتنی غامدی اور مرزا جہنمی کے بھی نہیں ہوئی تھی۔ بندربیچارہ چلاچلا کر کہہ رہاہوتاہےکہ ملحدین ہمار اولاد نہیں خنزیرکےاولادہے😂گدھا اب بہت خوش ہیں https://t.co/tsuwd5KyAi	In the earlier times, the donkey was very infamous, everyone used to talk about it. But since the atheists started calling themselves monkey, the poor monkey has been disrespected as much as Ghamdi and Mirza Jahanni. The poor monkey is shouting that the atheists are not our children, they are the children of pigs. Donkeys are very happy now https://t.co/tsuwd5KyAi	NIL	NIL	Hate
1606579506545844224	اس جذبے کو کوئی طاقت شکست نہیں دے سکتا ؟ چاہے اندورنی ہو یا بیرونی ؟ 💪💪 https://t.co/RBg2j3EpL9	No power can defeat this passion. Whether internal or external? 💪💪 https://t.co/RBg2j3EpL9	NIL	NIL	No_Hate
1565390580200443912	@pmln_org اور پاکستانی کرپٹ سیاستدانوں کے نیب، FIA چوری کیسز میں ریلیف دے کر عوام پر ڈاکا ڈال دیا گیا ہے ۔ https://t.co/bwVFRJtKOK	@pmln_org and Pakistani corrupt politicians have cheated the public by giving relief in NAB, FIA theft cases. https://t.co/bwVFRJtKOK	شیار غریف بت کی عفان کا نے ہن صب سے پرس نا ہوۓے	Shayar Gharif Bat Ki Affan Ka Ne Han Sab Don't worry about it	Hate
1578952119369240576	یہودی ایجنٹ کوئی شک؟ وہ اسے موسی علیہ السلام سے ملا رھے ھیں مگر اللہ نے چاھا تو ان شاءاللہ فرعون کی طرح غرق ھو کر نشان عبرت بنے گا۰ https://t.co/tVsoHvLuhe	Doubtful Jewish agent? They are meeting him with Musa (peace be upon him), but if Allah wills, he will drown like Pharaoh and become a lesson https://t.co/tVsoHvLuhe	و ۸۸۸۸۸۵۶۸۷۶2۶0 یں ا ا س شس 00 بی تا یکتاریخ رقم ہونے جاربی ہے جہہ	And 8888856876260 That's it 00 It seems like a historical sum	Hate
1593609670530244608	@Naeem_bukhari1 صرف ایک پیس ابھی سے عجایب گھر کھڑا کرکے سیکورٹی پر حرچ ھونے والے کروڑوں روپیہ بچ جاییںگے۔ اگر چہ گندے بوٹے پر کتا بھی پیشاب نھیں کرتا ھے https://t.co/zM44GaRa1i	@Naeem_bukhari1 just one piece away from wonderland Those who violate the security by standing up Crores of rupees will be saved. Even if the dog did not urinate on the dirty plant Does https://t.co/zM44GaRa1i	گھڑی جور بکڑا گیا! ددائنے بدٹس من سان آ کے ۰ سے 2+ گ۶ رات عان ے ۵ا ۳ ارم ا اعساب شہزاد ابر ۱ 1 ای ا ‎١‏ ‏7 بر ز نکر یکا تچ سی دابطہکیا۔ گرفاروقی ور ت بجھ سے دی اکر س٠‏ مگ یاچوراپنے می راعتساب ۷ مارتا۸!	The clock is broken! Dadane Badats Man San Aake 0 to 2+ g6 nights 5 A 3 Aram A Asab Shahzad Abar 1 1 ea 1 7. Grabarooqi The letter S0 from the fire Mug or thief own mi raatsab 7 beats 8!	Hate
1568952248683700224	ھم میانوالی سے نوابزادہ آف کالا باغ ملک وحید خان کا پیپلز پارٹی فیملی شامل ھونے پر خوش آمدید کہتے ھیں Welcome in Pakistan Peoples Party Family ❤️🖤💚 @benazeernoor @JavedAfridiPPP @saimahaseebraj2 @AdvMehr @ShababLiaqat @falakkh29679499 @PPP_Org https://t.co/KSu7msPZUN	We welcome Nawabzada of Kala Bagh Malik Waheed Khan from Mianwali to join the PPP family Welcome in Pakistan Peoples Party Family ❤️🖤💚 @benazeernoor @JavedAfridiPPP @saimahaseebraj2 @AdvMehr @ShababLiaqat @falakkh29679499 @PPP_Org https://t.co/KSu7msPZUN	NIL	NIL	No_Hate
1617386150846660610	اسٹیبلشمنٹ ایسے ننگی ہوئی جیسے میا خلیفہ۔ https://t.co/0NrwTDqASU	Establishment exposed like Mia Khalifa. https://t.co/0NrwTDqASU	NIL	NIL	Hate
1581521991861166080	صاحبِ رَجعتِ شمس و شقُ القمر نائبِ دستِ قدرت پہ لاکھوں سلام جس کے زیرِ لِوا آدم و من سِوا اس سزائے سیادت پہ لاکھوں سلام عرش تا فرش ہے جس کے زیرِ نگیں اُس کی قاہر ریاست پہ لاکھوں سلام اصل ہر بُود و بہبود تُخمِ وجود قاسمِ کنزِ نعمت پہ لاکھوں سلام 3) #كاميابی_صرف_حضورکےدین_میں https://t.co/LteW4jptrc	Lord of the return of the sun and the division of the moon Millions of salutations to the vicegerent of power Under which Adam and Man excepted Millions of salutations on this punishment Arsh is up to the floor, under which are naked Millions of salutations to his mighty state The essence of all goodness and well-being is the seed of existence Millions of salutations on Qasim-e-Kanz-e Nimat 3) #K…	کے	K	No_Hate
1594106043629445125	@TabiCh_DxB یہودی ایجنٹ https://t.co/leX4UWFlPd	@TabiCh_DxB Jewish Agent https://t.co/leX4UWFlPd	NIL	NIL	Hate
1606482638457278464	یہ ماں کے لوڑے کہتے تھے ہم سیاستدانوں کا گھر سے نکلنا بند کروا دیں گے آج عوام کے خوف کی وجہ سے مسجد میں چھپ کر نکاح کررہے ہیں https://t.co/svQhZKQlms	These mother's sons used to say that we will stop the politicians from leaving the house, today they are secretly getting married in the mosque due to the fear of the people https://t.co/svQhZKQlms	: ۲۷ں ۴م۲۴٢803۷/۹۹13۷)‏ ٢۸۲۹ا‏ 03۷۲ ۷۰۸۷۰۸ یادوڑ سابق ڈی جی آئی ایس پی آر آصف غفور کے بیٹے کا ۸ ۰ہ نکاح, تصاویر وائرل میڈیا رپیورٹس کے مطابق لیفٹیننٹ جنرل آصف غفور کے بیٹے سعد غفور کا نکاح اسلام آباد کی مقامی مسجد میں دوستوں نے شرکت گکی۔ /١٥٥٥۰٥٥)۱۷۱۲ءہ‏ ام ص۴۴ 0۴841( کے کع -	: 27th 4th 2428037/99137) 2829A 0372 708708 Yadav 8 of the son of former DG ISPR Asif Ghafoor 0h Nikah, pictures viral According to media reports, Lieutenant General Asif Ghafoor K Marriage of son Saad Ghafoor in local mosque of Islamabad Friends attended. /1555055) 1712 AH Um P. 44 04841 ( for -	Hate
1573663399732543488	@Sayrayousuf @GFarooqi شرم انکو آتی ہے جنکو بچپن سے شرم آتی ہو یہ غریدہ فاروقی زبیر عمر کے ساتھ پکڑی گئی اسکو شرم نہیں آئی اب ایک پارٹی نے غریدہ فاروقی کے شلوار کا جھنڈا بناکر پورے پاکستان میں لٹکا دیا اسکو کہتے ہیں شلوار اتار کر گلے میں ڈالنا https://t.co/O7SmOWSKBS	@Sayrayousuf @GFarooqi Shame comes to those who have been ashamed since childhood. This Ghareeda Farooqui was caught with Zubair Umar, she was not ashamed. Putting in https://t.co/O7SmOWSKBS	NIL	NIL	Hate
1568121574653321216	https://t.co/aZNZfTMAZdایشیا ءکپ کا لا حاصل میچ، بھارت نے افغانستان کو 101 رنز سے ہرادیا https://t.co/XWqvDZUx0H	https://t.co/aZNZfTMAZd Asia Cup match, India beat Afghanistan by 101 runs https://t.co/XWqvDZUx0H	NIL	NIL	No_Hate
1592967282158075904	@Voice_OfPAK چوکیدار کو گھر کے معاملات میں مداخلت کی اجازت نہیں دی جا سکتی ، کجا کہ چوکیدار پورے گھر پر قابض ہو کر گھر والوں کو ہی غلام بنا لے #غیر_سیاسی_پوسٹ #وہ_کون_تھا https://t.co/0J4dEpWBxI	@Voice_OfPAK Chowkidar cannot be allowed to interfere in the affairs of the house, unless the Chowkidar occupies the entire house and enslaves the family members. #non_political_post #who_was_that https://t.co/0J4dEpWBxI	NIL	NIL	Hate
1578928549805031425	@CMShehbaz چھپ کر بھکاری بے شرم بے وقوف آدمی عمران خان پاکستان کا شان ہے۔ عمران خان پاکستان کا جان ہے۔ https://t.co/F3LaQtm1FE	@CMShehbaz hide beggar shameless stupid man Imran Khan is the pride of Pakistan. Imran Khan is the soul of Pakistan. https://t.co/F3LaQtm1FE	NIL	NIL	Hate
1606725302012751872	۔ رہ وفا سے ہم اک گام بھی ہٹے تو نہیں لہولہان ضرور ہوۓ مگر ڈرے تو نہیں . #فريق_مجاهدون https://t.co/4nVkHllAxw	. If we do not take even one step away from loyalty There must be bloodshed, but don't be afraid . #فريق_مجاهدون https://t.co/4nVkHllAxw	NIL	NIL	No_Hate
1567802220707717120	ملک و قوم کا خیرخواہ ایک ہی ہے #ImranKhan باقی سب اقتدار پرست مفادات کےپجاری موقع شناس لالچی اور لٹیرےہیں جن کی سیاست کامقصد اپنی لوٹی ہوئی دولت کا تحفظ اور اقتدار کو اپنی نسلوں میں منتقل کرناہے یہی بات ان کو اکٹھا رکھےہوئےہے ورنہ وہ ایک دوسرےکے بدترین مخالف اور نظریاتی دشمن ہیں https://t.co/EsitoaGvnu	The welfare of the country and the nation is the same. #ImranKhan, all the rest are opportunists, greedy and plunderers of authoritarian interests, whose politics aim is to protect their stolen wealth and transfer power to their generations. Opponents and ideological enemies are https://t.co/EsitoaGvnu	NIL	NIL	Hate
1598682831571406848	لیڈی بگ (Ladybug) کسان دوست کیڑا.. https://t.co/v5sYW8w4tR	Ladybug (Ladybug) farmer's friend insect.. https://t.co/v5sYW8w4tR	5 0٤0 ۴17 ۲٥٢ 1 911۱045 ‏یہ‎	5 040 417 252 1 9111045 This	No_Hate
1566400022593380354	میرے محبوب تم میرے پھول ہو اور میں تمہارا چاہنے والا۔ تیری زندگی میری لئے خواب سے بیداری یے۔ تم سپنا نہیں میری حقیقت ہو۔ یقین اللّٰہ دیتا یے۔ انسان کسی کو یقین نہیں دلا سکتا۔ مگر میں اپنے عمل سے محبت کرسکتا ہوں۔ خاموش محبت 🌹nzk🇵🇰🌹 https://t.co/0eHlNsUPTW	My beloved you are my flower and I am your lover. Your life is a wake-up call for me. You are not a dream but my reality. Allah gives faith. Man cannot convince anyone. But I can love my actions. Silent love 🌹nzk🇵🇰🌹 https://t.co/0eHlNsUPTW	NIL	NIL	No_Hate
1578035851661115392	بھارت: ہندوؤں کی مذہبی تقریب میں پتھراؤ ، مسلمان ملزمان کی سرِ عام پٹائی تفصیل پڑھیں: https://t.co/g9tQ3YAbq0 https://t.co/mr1Gs2zmZF	India: Stone pelting at Hindu religious ceremony, public beating of Muslim accused Read details: https://t.co/g9tQ3YAbq0 https://t.co/mr1Gs2zmZF	NIL	NIL	No_Hate
1563838416491618304	کوئٹہ ۔رات کو ڈیم ٹوٹ نے کی افواہ نواں کلی کے ہزاروں افراد گھروں سے نکل گئے چوروں نے دو سو کے قریب گھروں کو لوٹ لیا ہے افسوس کہ ہزاروں مساجد ہمیں کامل مسلمان نہ بناسکیں لاکھوں علما کرام ہمیں راہ راست پر نہ لاسکیں https://t.co/ocMHKEGZCi	Quetta - Thousands of people of Nawan village left their homes after the rumor that the dam broke at night Thieves have looted around two hundred houses It is a pity that thousands of mosques cannot make us perfect Muslims, millions of scholars cannot guide us to the right path https://t.co/ocMHKEGZCi	NIL	NIL	No_Hate
1592964570754449408	بھانڈ،میراثی،دلال حرامخور چور ملک وقوم کے بدترین دشمن گھڑی کے پیچھے باؤلے کتوں کیطرح بھاگ اور بھونک رہے ہیں۔کیا پاکستان اور پاکستانی قوم کا مسئلہ ایک گھڑی ہی رہ گیاہے؟ پاکستان پر قابض بارہ جماعتی اتحادنے ملک کی معیشت تباہ و بربادکرکے صرف اپنے اپنے ذاتی مفادات کو پروان چڑھایا ہے https://t.co/bwmevfZhNe	The worst enemies of the country and the nation are running and barking like barking dogs behind the clock. Is the problem of Pakistan and the Pakistani nation only a clock? The twelve-party coalition occupying Pakistan has only promoted their own personal interests by destroying the country's economy https://t.co/bwmevfZhNe	)) 0 7٦أ‎ وسائل لوٹنے اور قوم کو غلام بنائے کی سازش ہو رہی ہے	)) 0 76 A To loot resources and enslave the nation A conspiracy is being made	Hate
1561295111900000256	#عوام_کامطالبہ_نئےالیکشن #پڑوسی_ملک_کے_آلہ_کار #امپورٹڈ_حکومت_نامنظور #MarchAgainstImportedGovt #غلطی_سدھارو_الیکشن_کراؤ #ہمارا_مطالبہ_فوری_الیکشن #چمچےصحافی_نامنظور چور چوری سے جائے ہیرا پھیری سے نَہ جائے ! https://t.co/4eJSoPJwZN https://t.co/nKWTLDwM4e	#अवाम_कामटालीबा_यायेक्ष्टी #Neighboring_Country_Ke_Alah_Car #imported_government_disapproved #MarchAgainstImportedGovt #correct_the_mistake_make_the_election #Our_demand_for_instant_election #Chamcheshahafi_unapproved The thief should not go by manipulation! https://t.co/4eJSoPJwZN https://t.co/nKWTLDwM4e	میرا بنا خوشی سے نہیں بلکہ ضے سے مجرہ دکچھ ربا تھا زا اس میں کوگی عمانحعت نھیں. و2 9	Mine was not made out of joy, but out of fear It was riba and there was no mercy in it. And 2 9	Hate
1581955582256648193	@Dr_FirdousPTI دوجاگیرداروں اورسیاسی پیروں کےبچوں کاآپس میں مقابلہ ہؤا،عام لوگوں نےانہیں ووٹ ڈالااوران میں سےایک جیت گیا۔سوال یہ ہےکہ عام گھروں کےلوگوں کواس سےکیاملےگا؟ جب تک عام لوگ ان جاگیرداروں کوووٹ ڈالتےرہیں گےتب تک یہ ذلت کی زندگی گزارتےرہیں گے۔پاکستان تیزی سےمکمل بربادی کی طرف گامزن ہے https://t.co/JARdM8qsMv	@Dr_FirdousPTI two landlords and children of political elites fought each other, the common people voted for them and one of them won. The question is what will the people of common houses get out of it? As long as the common people continue to vote for these landlords, they will continue to live a life of humiliation. Pakistan is fast moving towards total destruction https://t.co/JARdM8qsMv	ان ے157 لن 89 272+) کا ماب تح یک انصا فک مہرانو قرب کوقلست	157 Lin 89 272+) The maab of one justice is close to the Mahrans	Hate
1596167190025326593	کبھی جو چاند کو دیکھو ۔ تو اس کو غور سے دیکھو ۔ پھر اس میں یار کا چہرا ۔ تمھارے سامنے ہوگا ۔ مگر جب آنکھ جھپکو گے ۔ تو منظر ٹوٹ جائے گا ۔ تم اس پر مسکراؤ گے ۔ اور خود بھی مان جاؤگے ۔ بنا لفظوں کے چاھت کا ۔ یہ خود اظہار کرتی ھے ۔ محبت بات کرتی ھے ۔ #اثاثہ_اردو https://t.co/3Uhc45M1do	Ever look at the moon. So look at it carefully. Then the friend's face in it. It will be in front of you. But when you blink. So the scene will be broken. You will smile at it. And you will believe it yourself. Without words. It expresses itself. Love talks. #اثاثة_عردو https://t.co/3Uhc45M1do	NIL	NIL	No_Hate
1574400237728600064	انجلینا جولی نے اس بار نانی کو تھوڑا سا مشکل ٹاسک دیا ہ🤣😛👇 https://t.co/TrQ0c2dalj	Angelina Jolie has given Nani a tough task this time🤣😛👇 https://t.co/TrQ0c2dalj	سے لے ےم جج ود 4 فا	Take from M. Judge Vd 4 fa	Hate
1593165132972298240	بچے فریب کھا کے چٹائی پہ سو گئے اک ماں ابالتی رہی پتھر تمام رات #قومی_زبان https://t.co/0BNSXZOVkA	The children fell asleep on the mat A mother kept boiling stones all night #National_Language https://t.co/0BNSXZOVkA	NIL	NIL	No_Hate
1608979026189877250	کیا سوال ہونا چاہئے کہ جو حساس ادارہ ملک دشمن عناصر کی #پاکستان میں موجودگی،حرکات کی اطلاعات “اب” دے رہا ہے، کیا اُس کا کام یہ نہیں تھا کہ ایسے کوئ بھی عناصر ملک میں داخل نہ ہو پائیں؟ آپ کی کارکردگی صفر کیوں ہے؟ وڈیوز کے کاروبار سے فرصت مل گئی؟ ڈرامے بند اور الیکشن کراؤ #ISPR https://t.co/RsuOA5HRJD	What should be the question? That the sensitive organization which is giving information about the presence and movements of anti-national elements in #Pakistan, was it not its job to prevent any such elements from entering the country? Why is your performance zero? Got a break from the video business? Stop dramas and hold elections #ISPR https://t.co/RsuOA5HRJD	تازہ ترین آج کا اخبار آج کے کالمز __	Latest Today's Newspaper Today's Columns __	Hate
1562256086488473600	امام حرم الشیخ صالح آل طالب کو عدالت نے تمام الزامات سے بری کرکے رہا کرنے کاحکم دیا تھا۔ لیکن اپیل کورٹ نے کل بروز پیرماتحت عدالت کافیصلہ کالعدم قرار دیکر10سال قید کی سنا دی۔انہیں2018ءمیں اپنے تاریخی خطبے میں سعودی عرب میں جاری فحاشی و عریانی کے خلاف بیان دینے پر گرفتار کیا تھا https://t.co/uat9CPgcbB	Imam al-Haram al-Sheikh Saleh Al-Talib was acquitted of all charges by the court and ordered to be released. But yesterday, the appeal court overruled the punishment and sentenced him to 10 years in prison. He was arrested in 2018 for making a statement against obscenity and nudity in Saudi Arabia in his historical sermon https://t.co/uat9CPgcbB	NIL	NIL	No_Hate
1558116797982732289	امیر جماعت اسلامی سراج الحق نے بجلی بل پھاڑ کر پھینک دیا قصہ خوانی بازار پشاور میں بجلی بلز میں ناروا ٹیکسوں کے خلاف احتجاجی جلسہ عام میں سراج الحق نے کہا کہ بجلی بلوں کی صورت میں ڈاکہ کو نہیں مانتا، انھیں جلاتا، پھینکتا اور مسترد کرتا ہوں۔ #حل_صرف_جماعت_اسلامی #ووٹ_صرف_ترازوکا https://t.co/LrhbSkN0yn	Amir Jamaat-e-Islami Siraj-ul-Haq tore up the electricity bill and threw it away In a protest rally against illegal taxes in electricity bills in Qisa Khawani Bazaar, Peshawar, Sirajul Haq said that he does not accept daka in the form of electricity bills, burns them, throws them away and rejects them. #Hal_only_Jamaat_Islami #Vote_Only_Terazuka https://t.co/LrhbSkN0yn	کے 0 ت	K 0 t	No_Hate
1564537432745328641	@OfficialDGISPR چھ لاکھ ریگولر آرمی کے ہوتے ہوئے بھی ملاکنڈ ڈویژن میں آمن کیلئے افغان طالبان سے بھیک مانگتے ہوئے شرم نہیں آئی https://t.co/UQ3y9lHhVo	@OfficialDGISPR not ashamed to beg Afghan Taliban for peace in Malakand Division despite having 6 lakh regular army https://t.co/UQ3y9lHhVo	NIL	NIL	Hate
1564902831613673473	آج سے تقریباً 32 سال قبل 1989 کو سوویت یونین کی فوجیں 9 سال افغانستان پہ قابض رہنے کے بعد دریائے آمو کے پُل سے افغانستان سے شکست کھا کر بھاگنے کے مناظر ہیں۔ https://t.co/aKFOPv6LFc	About 32 years ago today, in 1989, there are scenes of the Soviet Union forces fleeing from Afghanistan after being defeated by the Amu River bridge after occupying Afghanistan for 9 years. https://t.co/aKFOPv6LFc	دوساتی نم 0 شی 1 افعالستان جاویدان	Dosati Nam 0 She 1 Faqeistan Javidan	No_Hate
1606275065993199616	عوام کے مینڈیٹ پر ڈاکا نا ڈالو عوام کا مینڈیٹ عوام کو دو #عمران_خان_ضروری_ہے https://t.co/Vh9ti5CqUb	Don't cheat on the people's mandate Give the mandate of the people to the people #Imran_Khan_is_essential https://t.co/Vh9ti5CqUb	5 ۴ : حھے او 5 8۴ کے ۔-۔ 3+	5 4 : Hey oh 5 84 K - 3+	No_Hate
1564205540561100800	غیرت سے پاک پٹواریوں کو اطلاع دی جاتی ہے کہ عمران خان اب پھر لائیو چھترول کرے گا اسلام آباد نے پیمرا کے نوٹس کی بتی بنا کر واپس کر دی جہاں سے آئی تھی مطلب جاتی امرہ کی رانی کو ویلکم دیر آئے درست آئے https://t.co/Ga7Dq9qnqx	It is reported to the shameless patwaris that Imran Khan will now do Chhatrol live again Islamabad made a note of PEMRA and returned it from where it came from, meaning welcome to the queen of Amra.	غیرت سے اگ پٹاریو ںکواطلاع دی جال ہے کہ عمرائن مان اب پچ لا نیوپھمترو لکرہ ےگا اسل مآ باونے پیر اکے فو سکی ہی نک رواپ کروی چہاں س کٹ ھی مطلب ایام رہ ران 2 دی رآتے ورس ت1آ نے	It is a net to inform the aggressors out of honor That Amrayan Maan will now come back to New Phamtru Asal maa bawne pir ake fo ski hi nik roap Karvi Chahan Sa Kathi Means Ayam Rah Ran 2 The raate verse t1 came	Hate
1614503883228827648	کراچی اور حیدرآباد کہ باشعور عوام آج اپنے گھروں سے نکل کر ووٹ کاسٹ کر کہ یہ ثابت کریں گئے کہ ووٹ بس عمران خان کا ہے اور غدار مافیا کو بد ترین شکست ہو گی #کراچی_کپتان_کا #حیدرآباد_کپتان_کا https://t.co/9urCfFSPJL	The intelligent people of Karachi and Hyderabad went out of their homes today to cast their votes to prove that the vote is only for Imran Khan and the traitorous mafia will suffer the worst defeat. #Karachi_Captain_Ka #Hyderabad_Captain_Ka https://t.co/9urCfFSPJL	NIL	NIL	Hate
1565728063450714116	ن لیگ اور پیپلزپارٹی دہشت گرد جماعتیں ہے #پاکستان_دشمن_پی_ڈی_ایم @TeamiPians https://t.co/2xbATe8qba	PML-N and PPP are terrorist parties #Pakistan_enemy_PDM @TeamiPians https://t.co/2xbATe8qba	NIL	NIL	Hate
[truncated: 7,993 more rows]
