# Supplementary material for: Multimodal hate speech detection: a novel deep learning framework for multilingual text and images
Source: PeerJ Comput Sci. 2025 Apr 16;11:e2801. doi: 10.7717/peerj-cs.2801 (PMC12190340; doi:10.7717/peerj-cs.2801)
Supplement: Supplemental Information 14 [file peerj-cs-11-2801-s014.xlsx]

## Sheet: Sheet1
Tweet_Id	Text	Text(English)	Image_Text	Image_Text(English)	Label
1558019697425219585	@SdqJaan اس مادر چوت کی مسخ شدہ لاش ملنی چائیے بلوچوں کی مسخ شدہ لاشیں پھینکنے سے آسمان نہیں گرتا تو اس دلے کی لاش پھینکنے سے بھی کچھ نہیں ہوگا صدیق جان کی ماں کے یار بے شمار بے شمار https://t.co/3B4QqGw8WE	@SdqJaan The mutilated body of this mother should be found. If the sky does not fall by throwing the mutilated bodies of Baloch people, then throwing the body of this heart will do nothing. Friends of Siddiq Jaan's mother are countless https://t.co/ 3B4QqGw8WE	NIL	NIL	Hate
1578714258766192643	@Jooookeeeerrrr یہ کس گانڈو کی اولاد ہے؟جو 60 سال تک پلے بوائے بنا پھرتا رہا۔۔بعد میں پنکی پیرنی کے ہنستے بستے گھر کو اجاڑ کر اپنا بسایا۔۔۔ہاتھ میں تسبیح پکڑنے سے زنا اور زنا سے پیدا کی ہوئی اولاد چھٹکارا حاصل نہیں ہوتا۔ حضرت عمرانڈو ملویسی کے پیروکارو ۔۔۔اپنے گھر میں جھانک لو https://t.co/7PYLsJSPH7	@Jooookeeeerrrr Whose Gondo's son is this? Who went around as a playboy for 60 years. Later he destroyed Pinky Pirni's laughing house and settled there. Does not get. Followers of Hazrat Imrando Milwesi .. Take a peek inside your home https://t.co/7PYLsJSPH7	8ا 8 8 :۰ 2 9 10:51 358 ۵۱ ۷۸۷۰۱ لھگ ٹیرئین بلکل عمران کی کاربن کاپی ہے, جبکہ بیٹوں ھ٭ کی شکل ذرا بھی عمران سے نہیں ملتی ۲ ' ۱ ا انا 04( ي)ااا ‎۱٢٢‏ ۱٥و8‏ ۹9 ۰5 1۸۳۴ 6:۵۲۱۶ ۱ہ 55 0ص۸ .اا۸ 0۴۷۵۱۷ ۲50۱0۵۵ ۱۷۷۶۸۵۲ تا 02 !ںہ۷ ۲83۸۴ "08 ۰ 7 تٰ 0 الا	8 a 8 8 :0 29 10:51 358 51 78701 approx Terion is basically a carbon copy of Imran, while the sons are The shape of Imran does not match at all 2 ' 1 Anna 04 J) Aaa 122 15 and 8 99 05 1834 6:5216 1h 55 0 p.8 .A8 047517 2501055 1776852 to 02 No. 7 28384 "08 07 0 Ala	Hate
1581521844645285889	@ihsannaseem1 ایسی لوگ ہوتے ہیں بہن فروش ، شکل سے ہی حرام کا تخم لگ رہا ہے ، جو مذبی کارڈ لے کر بیٹھ گیا ہے https://t.co/tjPCcTBf6s	@ihsannaseem1 Such people are sister sellers, the seeds of haram are visible from their appearance. Who sat down with a negative card https://t.co/tjPCcTBf6s	NIL	NIL	Hate
1568946725145960448	@chsandhilaa لعنت بے شمار اس مردود پر ۔۔۔ اس کا پورا ٹارگٹ یہی تھا پاکستان خدانخواستہ ڈیفالٹ کرے ۔۔۔ اور اس کنجر کو اپنی کارکردگی پر اتنا یقین تھا کے سری لنکا بنانے دے گا پاکستان کا ۔۔۔ اب ناکام ہوا تو تڑپ رہا ہے اور خانہ جنگی چاہتا ہے ۔۔۔ لعنت بےشمار۔۔ 🖐🖐🖐🖐 https://t.co/P08dhoUS6K	@chsandhilaa Curse countless on this rejected. His whole target was to make Pakistan default. And this kangar was so confident in his performance that he will let Pakistan make Sri Lanka. Now if he fails, he is desperate and wants a civil war. Countless curses. 🖐🖐🖐🖐 https://t.co/P08dhoUS6K	.. و پاکتا کا قرض ل80 بڑ حا ھ تود تار| کے ت ران گا نے والا ص رف اکر گا	.. and Pakata's loan for 80 years Tod tar | The only one who sings The letter will	Hate
1567084706851688449	یہ آئیں توڑیں یا جنرنلوں ججوں کو گالیاں دیں یا غداری کے کفر کے فتوے بانٹیں یا یہ پارلیمنٹ پر ایٹم بم گرانے کی باتیں کریں یا یہ ملک کو 3 حصوں میں تقسیم کرنے کی بات کریں ان کو کوئی کچھ نہیں کہےگابلکہ ان کو عدالتیں سیلوٹ پیش کر کے باعزت ہرجرم سےپاک کرتی رہیں گی #ریاست_کا_دشمن https://t.co/NSDTBedlqq	Let them break it or abuse the judges generals or distribute fatwas of disbelief of treason or talk about dropping atomic bombs on the parliament or talk about dividing the country into 3 parts, no one will say anything to them but the courts will salute them. She will continue to cleanse herself of all crimes #enemy_of_the_state https://t.co/NSDTBedlqq	عمران خان کے فیصل آباد جلسے میں پاک فوج کی سینئر قیادت سے متعلق بتک آمیز بیان کے معاملے پر آئی ایس پی آر تے کہا ہے کہ پاکستان آرمی میں چیئرمین پی ٹی آئی کے بیان پر شدید غم و غصہ ہے۔ 7 مہ فواد چوہدری کیخلاف توہینِ عدالت کی درخواست ناقابل سماعت قرار دیکر خارج	Pakistan Army in Imran Khan's Faisalabad rally of derogatory statements about the senior leadership of ISPR has said on the matter that Chairman PTI in Pakistan Army There is great outrage over the statement. 7 months Request for contempt of court against Fawad Chaudhry Dismissed as inadmissible	Hate
1573173393167458306	اٹھو انارکلی عمران نیازی اب بھی نااہل نہیں ہوا 🙃 @MaizaHameedMNA #مائزہ_خنزیرنی #بروکر_ڈاکو_زرداری #بھگوڑا_نوازشریف https://t.co/5IQ5AT6Whe	Get up Anarkali Imran Niazi is still not disqualified 🙃 @MaizaHameedMNA #Broker_Dako_Zardari #Bhagoda_NawazSharif https://t.co/5IQ5AT6Whe	NIL	NIL	Hate
1566235960219734016	باجی (ہرا hira )کے ممے کیسے لگے آپ کو DM بنتا ہے https://t.co/n1h5OUh2HK	How did Baji (Hira hira)'s moms feel, DM you https://t.co/n1h5OUh2HK	0 سو ری ا	0 so re a	Hate
1581321638884167685	@NazirLeghari دغاری لاغاری۔ زمین پے بھاری۔ شکل سے بھکاریی۔ بہت سی ہیں بیماری۔موت تھک گئی بیچاریی۔تمہیں آتی نہیں لاغاری۔ تکلیف کیا ہے تمہاری۔شکل پے پھٹکار ہےتمھاری۔ بیوی ملی نہیں کنواری۔پھر بیوی چھوڑ گئ تمھاری۔ مان بھی مر گئ تمھاری۔ خواہش سبکی ہے ہماری۔ تم کب مروگے بیماری لاغاری بھکاری 🐗🐖🦀 https://t.co/xwNc4zpDHy	@NazirLeghari Heavy on the ground. Beggar from form. There are many diseases. Death is tired and poor. You don't get tired. What is your problem? Your face is cracked. The wife did not find a virgin. Then the wife left you. Maan also died. The desire is ours. When will you die of sickness and beggars 🐗🐖🦀 https://t.co/xwNc4zpDHy	NIL	NIL	Hate
1573084976458899458	پاکستانی میاں بیوی نے تو ایک امریکی جج کو ٹوپی پہنائی، امریکی سفارت کاروں نے پاکستانی میر جعفر کے ساتھ مل کر بائیس کروڑ عوام کو ٹوپی پہنادی https://t.co/w2bLzP3zQb	Pakistani husband and wife put a cap on an American judge, American diplomats together with Pakistani Mir Jafar put a cap on twenty two million people https://t.co/w2bLzP3zQb	NIL	NIL	Hate
1599014100205719557	ہماری عدالتیں اتنی حساس ہیں کہ ایک سینئر وکیل اگر کمرہ عدالت کے اندر اپنا گاؤن جونئیر وکیل کو دے تو ان کی توہین ہو جاتی ہے اور یہ سزا سنا دیتی ہیں اور بے حس اتنی کہ حراستی تشدد پر ان کے کان پر جوں تک نہیں رینگتی۔ https://t.co/NUucWKSJYy	Our courts are so sensitive that if a senior lawyer gives his gown to a junior lawyer inside the courtroom, they are insulted and sentenced and so callous that they do not even listen to custodial violence. https://t.co/NUucWKSJYy	NIL	NIL	Hate
1578783723835002881	@summandar01 کھوتوں اور پٹواریوں کا دماغ خراب کرنے کا آخری حل۔۔۔کھوتا بریانی اور کھوتا قیمہ نان۔۔اس کے بعد۔۔میاں دے نعرے بجنے دے۔۔ 😂😂 https://t.co/QjeYinbcHJ	@summandar01 last solution to spoil the mind of khotas and patwaris.Khota biryani and khota qeemah naan.After that.Let Mian de slogans ring. 😂😂 https://t.co/QjeYinbcHJ	NIL	NIL	Hate
1613953838360465409	شہریوں کی حفاظت اور بہبود بنیادی اہمیت کے حامل ہیں۔ عبداللہ ہارون روڈ کے قریب مختلف مقامات پر کھلے مین ہولز پر مین ہول کے ڈھکن لگائے جا رہے ہیں۔ 📍District South,Karachi #MeraKarachi https://t.co/FUXZdrsmyw	Safety and welfare of citizens are of primary importance. Manhole covers are being installed on open manholes at various places near Abdullah Haroon Road. 📍District South, Karachi #MeraKarachi https://t.co/FUXZdrsmyw	NIL	NIL	No_Hate
1593612835736674305	@RehamKhan1 نواز شریف سے شادی کر لے یہ گیرا جن کی طرح قطری شہزادے کی رکھیل بن جا تحفے وصول کرنا https://t.co/FNodAhFpFS	@RehamKhan1 Marry Nawaz Sharif Yeh Gera Jinn Become a Qatari prince's raheel and receive gifts https://t.co/FNodAhFpFS	0و وو+‪۸۶ مریم نواز قطری شہزادے کے دیئے ہوئے ان تحقوں' کا حساب ے 886	0 and 86 Given by Maryam Nawaz Qatari Shahzada 886 calculation of fees	Hate
1617837701704871936	یہ دونوں بھگوڑے پاک فوج سے صرف اور صرف اپنی ان حرکتوں سے نکالے گئے تھے اور اب بھی ان کی حرکتوں میں کوئی تبدیلی نہیں آئی اب بھی یہ لوگ پاکستان کے خلاف ناکام پروپیگنڈا چلارہے ہیں۔ https://t.co/9A2nswtDpI	These two fugitives were expelled from Pakistan Army only because of their actions and still there is no change in their actions, still these people are running unsuccessful propaganda against Pakistan. https://t.co/9A2nswtDpI	20 7 دار فورج سے جوتیت راف مر ےرکب لے نے سم تش ۸ے والے دو پ73 شل میڈیاپہ اپ آ آپ پکوپاکستا نکا ا ھیرار کن ہیں	20 7 Dar From the forge, jotit raf mer rikb le ne sam tash 8e The two 73-page shill mediapa aap aap pukupaksta nikka ahirkan ahirkan	No_Hate
1564947770313785347	@WaseemA99531003 @Sn_Ashoo @geonews_urdu پاکستانی گشتی دے بچے نیازی عدالت بین پیش کرا آیا. تو وی نیازی تے باجی پیش کر. دلے تیری امی وینا دلی تو دلی دا بچہ https://t.co/U9yo5Nug7R	@WaseemA99531003 @Sn_Ashoo @geonews_urdu Pakistani patrol kids Niazi appeared before the court. So he presented Niazi and Baji. The hearts Teri ami veena dili to dili da bacha https://t.co/U9yo5Nug7R	NIL	NIL	Hate
1563502441781272576	امریکی عدالت کا بڑا فیصلہ افغان منجمد اثاثے نائن الیون متاثرین کو دینا کسی صورت درست نہیں،امریکہ سات ارب ڈالر کے منجمد اثاثے افغان مرکزی بینک کو واپس ادا کرے، افغانستان میں قائم طالبان حکومت کو تسلیم کرنا یا نہ کرنا امریکی صدر کا کام ہے,اس کا عدالت سےکوئی سروکار نہیں https://t.co/vsRLs8pkvW	Major decision of the US court It is not right to give frozen Afghan assets to 9/11 victims. The United States should return seven billion dollars of frozen assets to the Afghan central bank. It is the job of the American president to recognize the Taliban government in Afghanistan or not, it has nothing to do with the court. No https://t.co/vsRLs8pkvW	8م 108۷ ۱۷۷۷۷۷۷۰۵۱۵۲٣۷٥	8th 1087 177777705152375	No_Hate
1567085231772950529	لاپتہ افراد کے فیملیوں کو آج 47 دن پورے ہو گئے ہیں کہ وہ کوئٹہ گورنر ہاوس کے سامنے ریڈزوں میں سراپاِ احتجاج ہیں۔مسلسل بھیٹنے سے روز اُن کی تبیعت بگڑ رہی ہیں لیکن ابھی تک اُس بے حس حکمران کی کان پر جون تک نہیں رینگتی۔ #RedZoneSitInProtest #Balochistan @UN #EnforcedDisappearance https://t.co/fyYVNjSXkc	It has been 47 days today for the families of the missing persons that they have been protesting in front of the Quetta Governor House in reds. Their condition is getting worse day by day due to continuous visits, but it still doesn't come to the ears of the insensitive ruler. #RedZoneSitInProtest #Balochistan @UN #EnforcedDisappearance https://t.co/fyYVNjSXkc	NIL	NIL	No_Hate
1567544285360230400	@RajaBil71188712 @SunyMQMpk @SAMAATV کھوتے دا پُتر امپورٹیڈ فتنہ نیازی نامنظور https://t.co/OCEUqDN4lG	@RajaBil71188712 @SunyMQMpk @SAMAATV Lost Son Imported Fitna Niazi Disapproved https://t.co/OCEUqDN4lG	NIL	NIL	Hate
1580579098992136192	@Atifrauf79 بھنگی گینگ اف یوتھیے #بے_شرم_یوتھیے https://t.co/DwwN6ZHf2b	@Atifrauf79 Bhangi Gang of Uthiye #बे_शरम_युथीये https://t.co/DwwN6ZHf2b	NIL	NIL	Hate
1618185736645406722	اجے دیوگن پٹھان کی ایڈوانس بکنگ پرخوش - https://t.co/z8oj82CywO https://t.co/Z4QVDk5SCb	Happy with Ajay Devgan Pathan's advance booking - https://t.co/z8oj82CywO https://t.co/Z4QVDk5SCb	NIL	NIL	No_Hate
1566632812228354048	@ShoaibChouhdry @AmjadMajeed335 @TheRealPCB 🤣🤣🤣 پٹواری کہیں تو بھڑاس نکالیں گے https://t.co/mJ9Yp1A0ww	@ShoaibChouhdry @AmjadMajeed335 @TheRealPCB 🤣🤣🤣🤣🤣🤣🤣🤣🤣🤣🤣🤣🤣🤣🤣🤣	NIL	NIL	Hate
1614356692312915972	سلامتی کونسل کے ارکان ممالک کا اجلاس،طالبان سے خواتین کے خلاف عائد تمام پابندیاں ختم کرنے کا مطالبہ. اقوام متحدہ،14 جنوری:۔ افغانستان میں طالبان حکومت کی جانب سے خواتین کی تعلیمی اور عوامی سرگرمیوں پر عائد پابندی کے سلسلے میں اقوام متحدہ کی سلامتی ک https://t.co/JiouifOZev https://t.co/oZEUTrJ2k5	Meeting of the member countries of the Security Council, demand from the Taliban to end all restrictions imposed against women. United Nations, January 14: In relation to the ban imposed on women's educational and public activities by the Taliban government in Afghanistan, the UN Security Council https://t.co/JiouifOZev https://t.co/oZEUTrJ2k5	NIL	NIL	No_Hate
1614970343659274240	الیکشن کے دوران سیکیورٹی کو مؤثر بنانے کے لیے "اسنیپ چیکنگ"، "سرچ آپریشن"، "فلیگ مارچ" و دیگر سیکیورٹی اقدامات کیے گیے۔ سندھ رینجرز کے جوانوں کو قوم کا سلام #SindhRangers #LocalBodyElection #PakArmyInService https://t.co/dLxwnO0qP1	"Snap checking", "search operation", "flag march" and other security measures will be taken to make security effective during the election. Nation's greetings to the soldiers of Sindh Rangers #SindhRangers #LocalBodyElection #PakArmyInService https://t.co/dLxwnO0qP1	ڈی جی رینجرز سندھ, کا کراجی میں پولنگ اسٹیشنز کا دورہ	Karji of DG Rangers Sindh I visit the polling stations	No_Hate
1578047815078629376	بچپن سے یہی بات سنتے آئے ہیں کہ جھوٹا انسان بات بات پر قسمیں کھاتا ہے #ImranKhan #TeamMBokhari https://t.co/NCgQA8sSHK	We have been hearing this since childhood that a liar swears by something #ImranKhan #TeamMBokhari https://t.co/NCgQA8sSHK	بزیلتگ ور ۔ 7 0 0 کہ گراۓ ات ڈراڑنے ے ۵ وت اتمم خہبازٹ ریف ۱ ٰ سسسمت ای دن عمران خیازی ثی دی پ خودار ہو ےاو رکہاا سی توڑر پاہوںءوز شف حم	Beziltag var. 7 0 0 5 Wat Atmam Khabazat Ref 1 On this day, Imran Khayazi got up and kept his legs clean.	Hate
1572963494051385344	@KorangiSector90 @ISPROfficial2 @AltafHussain_90 @AsadAToor او نیچ او دلّتوں کی اولادوں اپنی اوقات میں رہو ۔ عمران احمد خان نیازی شاخ شیرماندخیل نے پٹھان ہوکر ہمیں یہ تربیت دی ۔ کہ کوئی پٹھان مہاجر پنجابی سندھی بلوچی کشمیری نہیں صرف پاکستانی۔ پاکستان کے دشمنوں سے لڑنا ہے چاہے طالب ہو الطاف کالیا یا ولی خان و اچکزئی ہو،یا شریف و زرداری، https://t.co/R44DwbyYMH	@KorangiSector90 @ISPROfficial2 @AltafHussain_90 @AsadAToor O children of the lowly and Dalits live in your times. Imran Ahmed Khan Niazi branch of Shermandkhel became a Pathan and gave us this training. That there is no Pathan Mihajr, Punjabi, Sindhi, Balochi, Kashmiri, only Pakistani. Pakistan's enemies have to be fought whether it is Talib Altaf Kalia or Wali Khan and Achakzai, or Sharif and Z…	جس پیی سے مس رنہ ہو ھک یہت اس ٹیک ری کے پ رم ردوز نکوچلادو	From which Pi Miss Runa Ho Hak Yeht This tech is completely different	Hate
1617785903979843584	@ShahidKhaqanA ضمنی انتخابات اور اسمبلیاں تحلیل ہونے سے پہلے بھی یہ اسہی قسم کی گیدڑ بھپکیاں لگاتے تھے پھر عمران خان نے پنجاب کے ضمنی انتخابات میں ان کا حشر نشر کر کے ان کو گھسیٹتا ہوا اس انتخابات تک لیکر اگیا جس سے یہ گیدڑ دوڑتے پھر رہے تھے ابھی تو ان کی پبلک کے ہاتھوں بھی چھترول ہونی ہے۔ https://t.co/HPvqXpQeGP	@ShahidKhaqanA They used to do the same bullshit even before the by-elections and assemblies were dissolved. Then Imran Khan by-elections of Punjab I broadcast their fate They were dragged to the election from which these jackals were running Now they have to be protected by the public. https://t.co/HPvqXpQeGP	NIL	NIL	Hate
1579563945131905024	ہم ان بے نسل لوگوں کے زیر قبضہ ہیں دوستوں نہ مزہب نہ تہزیب نہ اخلاق نہ انسانیت ہے ان میں کمبر بلوچ #پنجابی_فوج_اور_اس_کے_آلہ_کار https://t.co/hXzHXv0BQy	We are under the control of these raceless people, friends There is no religion, no morality, no humanity in them Kimber Baloch #Punjabi_Army_and_its_equipment https://t.co/hXzHXv0BQy	NIL	NIL	Hate
1573801019166842881	باجوہ اس فوج کا COAS ہے جسکی میرٹ پر ہم بہت نازاں تھے اور کرپٹ سیاستدانوں پر کیچڑ اچھالتے تھے مگر 70 سال بعد اب اس حقیقت کا اشکار ہوا کہ پاکستان کی فوج میں بھی میرٹ نام کی کوئی چیز نہیں اور اس کا جیتا جاگتا ثبوت باجوہ ہے جس نیں چور اور ڈاکوں کو مسلط کیا😛 #چور_چوکیدار_چن_رہا_ہے https://t.co/2EvpcxWvX1 https://t.co/MDt2He9nKQ	Bajwa is the COAS of this army, whose merit we were very suspicious of and used to throw mud on corrupt politicians, but after 70 years, now the fact has come to light that there is no such thing as merit in Pakistan's army and Bajwa is living proof of this. Who imposed thieves and dacoits #चॉर_चोधिदार_चन_रहा_हे https://t.co/2EvpcxWvX1 https://t.co/MDt2He9nKQ	NIL	NIL	Hate
1581542995090100226	@jawadahmadone پیارے مسلمان بھائیو اس ملک دشمن قادیانی کتے کو اپنا قیمتی ووٹ دے کر اپنی آخرت اور ووٹ خراب مت کریں شکریہ🤔🤔 https://t.co/bHmPy12Dos	@jawadahmadone Dear Muslim brothers Don't spoil your future and your vote by giving your precious vote to this anti-national Qadiani dog Thank you 🤔🤔 https://t.co/bHmPy12Dos	NIL	NIL	Hate
1596196294061596680	عمران خان کی حفاظت کے لئے آیت الکرسی پڑھتے رہیں #ActualWarInPakistan https://t.co/nOAtzvo7Jc	Keep reading Ayatul Kursi to protect Imran Khan #ActualWarInPakistan https://t.co/nOAtzvo7Jc	NIL	NIL	No_Hate
1593851849442209793	عمران خان ایک سچا ایماندار نڈر اور محب وطن لیڈر ہے ہم پٹھان مرتے دم تک خان کے ساتھ کھڑے رہیں گے انشاءاللہ ۔اور ہر موڑ پر بھگوڑوں ڈاکووں غداروں اور ملک سے بھاگے ہوئے بے غیرتوں کا بھر پور مقابلہ کریں گے انشاءاللہ ۔ https://t.co/8e2h1MJ6cM	Imran Khan is a true, honest, fearless and patriotic leader. We Pathans will stand with Khan till death, God willing. And at every turn, we will fully fight the fugitives, robbers, traitors and the dishonest people who have fled the country, God willing. https://t.co/8e2h1MJ6cM	NIL	NIL	Hate
1608463408307011584	پاکستان تحریک انصاف کے سینیٹرز کا چئیرمین عمران خان کی زیر صدارت اجلاس روز بروزبگڑتی ہوئی صورتحال اور ملک میں جاری انسانی حقوق کی خلاف ورزیوں پر اظہار افسوس۔ سینیٹر اعظم سواتی جیسے معزز شہریوں کی جس طرح تذلیل کی جا رہی ہے ایسا کسی مہذب معاشرے میں ایسا سوچا بھی نہیں جا سکتا۔ https://t.co/6qPL2m6Jj2	Pakistan Tehreek-e-Insaf senators meeting chaired by Chairman Imran Khan Expressing regret over the daily worsening situation and the ongoing human rights violations in the country. The way respectable citizens like Senator Azam Swati are being humiliated is unthinkable in any civilized society. https://t.co/6qPL2m6Jj2	NIL	NIL	No_Hate
1618147130161655808	مرشد پٹھان زیادہ کیوٹ ہوتے ہیں یا پنجابی ۔۔۔؟؟🙈 https://t.co/G1fuTEUb9X	Murshid Pathan is more cute or Punjabi..??🙈 https://t.co/G1fuTEUb9X	NIL	NIL	No_Hate
1614449607991255048	وفاقی حکومت ذیادتی پر ذیادتی کر رہی ہے۔ شکریہ کے پی سی ایم مخمود خان. @IMMahmoodKhan #MergedAreasRights https://t.co/Mw1qOyzzXo	The federal government is doing more and more. Thank you PCM Makhmood Khan. @IMMahmoodKhan #MergedAreasRights https://t.co/Mw1qOyzzXo	وفاقی حکومت کی نوٹیفائی کردہ سٹیئرنگ کمیٹی وزیر اعلی خیبر پختونخوا کا رد عمل 0پ 200-0 تھ انی فنڈزر ہے ہی ںگرا بکک صرف پا ارب روبے عاربی کئے گئ ہیں صو بائی علومت شم ا ضلاع کے س ریاری لاز ی۲ نکیا تخواہیں اور صحح تکار ڈ کے یی اپنے پیٹ سے اد اکر ‎٤‏ ‏ریے۔ 0و ع 0۷ وزٍای کورعان	Steering Committee notified by Federal Govt Khyber Pakhtunkhwa Chief Minister's reaction 0p 200-0 This funder is only 5 billion rubles Arabic has been made by the provincial science schools of the districts Do not ask for anything and do what is right from your stomach. Ray 0 and A 07 Minister of the Qur'an	No_Hate
1565992718630780928	@CHGHULAMHUSAlN جیسے کہ اس بڈھے خبیث نے ٹٹے چوسنے میں پی ایچ ڈی کی ہوئی ہے لیکن کیونکہ یہ صرف نشئی کے ٹٹے ہی چوستا ہے لہذا بنی گالا سے آیا اس کے لیے ایوارڈ https://t.co/XeHcE7M30o	@CHGHULAMHUSAlN Like this big bastard has a PhD in sucking dicks but because he only sucks dicks, he got an award from Bani Gala https://t.co/XeHcE7M30o	NIL	NIL	Hate
1566561211075944450	ہیرامنڈی کا دلال https://t.co/QXiKsDh6QD	Hiramundi Pimp https://t.co/QXiKsDh6QD	[١١ 0۲٢٥٥٢٢٢۵٠ ٢	[11 0225522250 2	Hate
1579501100885241856	سارے ڈاکو مل کر اس قوم کو تباہی کی جانب لے کرجا رے ہیں، یہ چاہتے ہیں قوم انہیں تسلیم کر لے، مگر قوم فیصلہ کرچکی وہ کسی صورت انہیں قبول نہیں کرے گی۔ چیئرمین عمران خان @FatimaG72955570 #یہ_بازی_کپتان_ہی_جیتےگا https://t.co/fbwQbwIMZu	All the bandits are leading this nation towards destruction, they want the nation to accept them, but the nation has decided that it will not accept them under any circumstances. Chairman Imran Khan @FatimaG72955570 #Yeh_Bazi_Captain_Hi_Will_Win https://t.co/fbwQbwIMZu	جنوں ےہر شق ‌ ٰ عشق..., آزادی!	Jinn Yehar Shaq Love..., freedom!	Hate
1577996228440236034	@OfficialDGISPR سنا ہے لندن میں بیٹھاہوا دہشت گردکراچی کے لیے پھرلانچ کیاجا رہاہےالطاف حسین لایا گیاتو کراچی والے اینٹ سے اینٹ بجا دے گے اس ڈیشت گرد نے کتنے ماجروں کو اپنی گندی اور خونی سیاست کے لیے قربان کیا کوشش بھی مت کرنا اس دہشتگرد کولاکر کراچی حیدرآباد کا امن خرابُکرنےکےلیے https://t.co/o8gTHfoPNz	@OfficialDGISPR I have heard that the terrorist sitting in London is being launched again for Karachi. How many people this terrorist has sacrificed for his dirty and bloody politics, don't even try to bring this terrorist to destroy the peace of Karachi Hyderabad https://t.co/o8gTHfoPNz	NIL	NIL	Hate
1614869152367316993	@NawazshrifMNS کیسے لوگ ہیں کل تک ایک دوسرے کے خلاف منجن بیچتے تھے آج ایک دوسرے کو مبارکباد دے رہے ہیں واہ رے واہ سیاست https://t.co/LnY0sHTKQk	@NawazshrifMNS how are people till yesterday they used to fight against each other today they are congratulating each other wow wow politics https://t.co/LnY0sHTKQk	NIL	NIL	No_Hate
1597974782754304002	ہائ ماشاءاللہ❤ ایک بار پھر یوتھیوں کو جلانا چاہتا ہو😂 زرد پگڑی والا قائد ہے میرا❤ https://t.co/aCiFkdRkWV	Hi mashallah ❤ You want to burn the youths once again😂 The leader with the yellow turban is mine ❤ https://t.co/aCiFkdRkWV	NIL	NIL	Hate
1574320122889650178	چچا بھوسڑی والے منافق 🤔🤔 @TariqJamilOFCL ⬇️⬇️ تمہاری ماں کی فدی میں ڈانس کروں یہ ہے تمہاری کل اوقات کہ کرتارپور سکھوں کی مڑھی کو بھی ماتھا ٹیکنے چل پڑے 🤔🖐🏻 https://t.co/esVHPpnXXl	Uncle is a hypocrite with stubble 🤔🤔 @TariqJamilOFCL ⬇️⬇️ Let me dance for your mother's redemption. This is your total time to bow down to the Mardhi of Kartarpur Sikhs 🤔🖐🏻 https://t.co/esVHPpnXXl	NIL	NIL	Hate
1566403591442669568	اللہ ان لوگوں کی حفاظت فرمائے آمین اور یا اللہ ہمیں #PakistanVatican سے نجات دلا آمین https://t.co/DSFl15pP1u	May Allah protect these people And may Allah deliver us from #PakistanVatican Amen https://t.co/DSFl15pP1u	جب بھی یہ گاڑی دیکھو دعائیں دیا کرو کیونکہ یہ وہ لوگ ہیں جو اپنا آج تمھارے کل پہ قربان کر دیتے بیق . ینم 2 ۱ : 1ط از	Whenever you see this car, pray for it They are the people who would sacrifice their today for your tomorrow Beg. Psalm 21:1	No_Hate
1593173912669818882	گھڑی چور بہروپیا مکہ ننگے پاؤں جانے کا ڈھونگ عوام کی ریاست مدینہ کے خواب خود خانہ کعبہ کی تصویر سے مزين گھڑی 30 کروڑ روپے میں بیچ دی #گھڑی_چوری_اور_سینہ_زوری @Atifrauf79 https://t.co/PsI2vx2Zez	Watch thief Bahrupia Pretending to go to Makkah barefoot Dreams of the People's State of Madinah A watch decorated with the image of the Holy Kaaba was sold for Rs 30 crore #Watch_stealing_and_chest_force @Atifrauf79 https://t.co/PsI2vx2Zez	تھچ ہے 72 7 تو امم کوریاست م یہ ے نو اب ےھ ۳ییی‌یییٰٰ ۴ 0 کروڑ روپ میں بیج دی ۴	Thatch is 72 7 So Umm Kuriyastm is now nine now 3 Yayyyy 4 0 crore seed given 4	Hate
1566725497643474946	اسلام آباد میں اسلام آباد پولیس نے تحریک لبیک پاکستان کی جانب سے سیلاب متاثرین کے لیے امداد لے جانے والے ٹرکوں کو روک کر ان کا چلان کیا گیا ہے۔ افسوس ہم کیسے مسلمان ہیں نہ تو خود کسی کی مدد کرتے ہیں اور نہ ہی کسی اور کو کرتے ہوئے دیکھ سکتے ہیں https://t.co/cct2NntOdm	In Islamabad, the Islamabad Police have stopped the trucks carrying aid for the flood victims on behalf of Tehreek-e-Labaik Pakistan. Alas, how can we Muslims neither help anyone nor see anyone else doing it https://t.co/cct2NntOdm	NIL	NIL	No_Hate
1563059725285015552	سنا ہے جواد احمدی بھی نکل لئے ہیں خاموشی ہیں https://t.co/gMCvS5Qshf	I have heard that Jawad Ahmadi also came out There are silence https://t.co/gMCvS5Qshf	NIL	NIL	No_Hate
1567899788389105667	#AmendTransgenderAct آئیے ہماری آواز میں آواز ملائیے اور مسلمانوں اور دین ِ اسلام کے خلاف دشمنوں کی سازش کو ناکام بنانے میں اپنا کردار ادا کریں https://t.co/BIzRoacN32	#AmendTransgenderAct Let's join our voices and play our part in defeating the plot of the enemies against Muslims and the religion of Islam https://t.co/BIzRoacN32	بہعادرے پاس صرف التب رکا ایک ہییرے ھہ۔۔ ۱ مل می تی فی کر ےک اس لیے اس موی علاءہا کلذ اسلائی ‎١‏ ْ موراتسوشل مٹیا ایٹیوسٹ بھ پور عم اٹھائیں عو ائی پر یر ال" ْ ل کہ مقبو ط ام بی لالی ا خلاف اسلام خلاف دحتور ملک دفارغ اور می ری تر میم کے خلاف ڈٹ سے ۱	Bahadre has only one diamond in the middle. 1 millimeter per car, so it is moi alaaha kuluz islai 1 "More and more social media activists have raised their voices." ْ For that Maqbu Tambi Lali a against Islam, against Dahtor Malik Dfarg and 1	No_Hate
1566343185609199618	بعض شیر چڑیا گھر میں آئے ہیں تاکہ پنجرے میں بند انسانوں کو دیکھ سکیں. یہ شیر ہم انسانوں کو اتنا وحشی اور خطرناک درندہ کیوں سمجھتے ہیں؟ بقول جارج بش جونیئر ‘Why? We are good people.’ https://t.co/zkpewRezGs	Some tigers have come to zoos to see humans in cages. Why do we humans consider this lion to be such a wild and dangerous animal? According to George Bush Jr 'Why? We are good people.' https://t.co/zkpewRezGs	NIL	NIL	No_Hate
1613196034272014336	افغان دارالحکومت میں رواں سال کے دوسرے بڑے حملے میں کابل میں وزارت خارجہ کے باہر ایک مشتبہ خودکش بمبار کے خود کو دھماکے سے اڑا لینے کے بعد کم از کم 20 افراد ہلاک ہو گئے ہیں۔ https://t.co/0ivMRZEVcy	At least 20 people have been killed after a suspected suicide bomber blew himself up outside the foreign ministry in Kabul in the second major attack this year in the Afghan capital. https://t.co/0ivMRZEVcy	NIL	NIL	No_Hate
1593164980316418048	شیخ رشید کو دھمکی آمیز کال پر نامعلوم شخص کیخلاف مقدمہ درج #Sheikhrasheed https://t.co/CPiyflrqa9 https://t.co/Jt9qAIzh4i	Case filed against unknown person for threatening call to Sheikh Rasheed #Sheikhrasheed https://t.co/CPiyflrqa9 https://t.co/Jt9qAIzh4i	NIL	NIL	No_Hate
1581315499476287488	@SK1_PTI اس حلوے کا کھانا حرام ہے کیونکہ اس میں کشمش ڈالی گئی ہے کیونکہ انگور کا پانی آگ پر گرم کرنے سے شراب بن جاتا ہے اور کشمش درحقیقت انگور ہی ہے مگر ملا فضلو کو بہت پسند ہے کشمش والا حلوہ ہو سکتا ہے فقہ عمر خطاب کے مطابق شیخ ابو حنیفہ (رح )نے اسے حلال کر رکھا ہو https://t.co/eanPO1t6tv	@SK1_PTI It is haram to eat this halwa because raisins have been added to it because grape juice becomes alcohol by heating it on fire and raisins are actually grapes. But Mulla Fazlu likes raisin halwa very much. According to Fiqh Umar Khattab, Sheikh Abu Hanifah (RA) has made it halal https://t.co/eanPO1t6tv	NIL	NIL	Hate
1564558774056230912	اگر یہی حالت ہونی ہے تو پھر غرور کس بات کا اللّٰہ تعالیٰ ہمارا خاتمہ ایمان پر فرمائے آمین.😢... https://t.co/H6cWYjjYST	If this is the situation, then what is the point of pride? May Allah make our end on faith Amen. 😢... https://t.co/H6cWYjjYST	NIL	NIL	No_Hate
1587727090496970753	@A68790 @RashidNasrulah @MaryamNSharif ہیرا منڈیاں ٹھنڈی ہو جائیں تو ماؤں بہنوں کے بے روزگار دلال یوں ہی تیری طرح دہائیاں دیتے نظر آتے ہیں کوئی ایک آنہ کشکول میں پھینک جاتا ہے کوئی دو آنے۔ لنڈن کا سب سے بڑا کاروبار بھی یہی ہے۔ ہمارے اسلامی جمہوریہ پاکستان میں بہرحال اس غیر اسلامی قبیح کاروبار کی کوئی گنجائش ہی نہیں۔ https://t.co/7PVScMLEAA	@A68790 @RashidNasrulah @MaryamNSharif If the diamond markets cool down, unemployed pimps of mothers and sisters are seen giving decades just like you. This is also the largest business in London. In our Islamic Republic of Pakistan, however, there is no room for this un-Islamic ugly business. https://t.co/7PVScMLEAA	NIL	NIL	Hate
1593642422797467665	بریکنگ نیوز لندن میں سید جی ایم شاہ کی قائد میاں نواز شریف سے اہم ملاقات پاکستان مسلم لیگ ن ضلع نواب شاہ کے #صدر_سید_جی_ایم_شاہ کی #قائد_میاں_محمد_نواز_شریف سے لندن میں اہم ملاقات اس موقع پر سید جی ایم شاہ نے سندھ کی ثقافت سندھی اجرک کا تحفہ پیش کیا https://t.co/qE2hatDyQQ	Breaking news Important meeting of Syed GM Shah with Quaid Mian Nawaz Sharif in London Important meeting of Pakistan Muslim League-N District Nawab Shah #President_Syed_GM_Shah with #Quaid_Mian_Muhammad_Nawaz_Sharif in London. On this occasion, Syed GM Shah presented the gift of Sindhi culture of Sindh.	NIL	NIL	No_Hate
1568948856754212865	اس موقع پر کالونی پاکستان کی قومی پرچم سرنگوں ہوگی ۔ مولانا فضل الرحمن امیر سعد رضوی فاتحہ خوانی پڑھے گی ۔ امپورٹڈ سوگ https://t.co/JwO4CMW7qd	On this occasion, the colony will fly the national flag of Pakistan. Maulana Fazlur Rahman Ameer Saad Rizvi will read Fatiha Khawani. Imported mourning https://t.co/JwO4CMW7qd	ملکه الزبتھ دوم کی وفات پر ,یب7	On the death of Queen Elizabeth II 7	Hate
1578765886500270080	کہاں چھپ گیا ہے یہ کتا۔ جب باپوں سے گارنٹی ملے تب ٹی وی پر اپنے سور جیسے گندے منہ سے بھونکے گا اور لفافے ناچ ناچ کر گھنگرو توڑیں گے۔ https://t.co/xYiKljjrTX	Where is this dog hiding? When he gets a guarantee from his father, he will bark at the TV with his dirty mouth like a pig and the envelopes will dance and break the curls. https://t.co/xYiKljjrTX	865 4 ؟ 4200 :- 22 > ھت :ا اس سس *۸0-- 8101 ل :	865 4? 4200 :- 22 > Here: A this sister *80-- For 8101:	Hate
1596196349011456000	عمران خان کل ہیلی کاپٹر سے پنڈی پہنچ کر چوک مارچ کی قیادت کریں گے۔ https://t.co/mmk2ifz2OI	Imran Khan will reach Pindi by helicopter tomorrow and lead the chowk march. https://t.co/mmk2ifz2OI	و رھ ھ و ےہ تے__ ‎١‏ 07ي]) چا ِ کی کن 6 و 01 جعادیالاول: 7	And so __ 1 07]) Cha Who are you? 6 and 01 Jadia Awal: 7	No_Hate
1593627345063133186	مولانا طارق جمیل اسد خٹک اور وینا ملک میں صلح کرائیں گے ؟ #VeenaMalik #MolanaTariqJameel #asadkhattak کراچی: اداکارہ وینا ملک کے سابق شوہر اسد بشیر خٹک نے مولانا طارق جمیل سے درخواست کی ہے کہ وہ ان دونوں کے تنازعات حل کروانے میں کردار ادا کریں۔ https://t.co/F5ZAkVUIhY https://t.co/VeQ2ezK5ta	Maulana Tariq Jameel will make peace between Asad Khattak and Veena Malik? #VeenaMalik #MolanaTariqJameel #asadkhattak Karachi: Actress Veena Malik's ex-husband Asad Bashir Khattak has requested Maulana Tariq Jameel to play a role in resolving their disputes. https://t.co/F5ZAkVUIhY https://t.co/VeQ2ezK5ta	NIL	NIL	No_Hate
1566701055609638912	ڈی پی او میانوالی محمد نوید کی جانب سےاوپن ڈور پالیسی کے تحت روزانہ کی بنیاد پر کھلی کچہری کا سلسلہ جاری۔ ڈی پی او میانوالی نے شہریوں کے مسائل سنے اور درخواستیں متعلقہ افسران کو مارک کرتےہوئے بذریعہ فون شہریوں کی دادرسی یقینی بنانے کی ہدایت جاری کیں۔ https://t.co/tnHr7LRAx5	On behalf of DPO Mianwali Mohammad Naveed, open court is being conducted on a daily basis under the open door policy. DPO Mianwali listened to the problems of the citizens and issued instructions to ensure the justice of the citizens by marking the requests to the concerned officers. https://t.co/tnHr7LRAx5	NIL	NIL	No_Hate
1578348438462210048	ڈڈّو چارجر کو پھر لوز موشن لگ گئے!!!😃🤣 بیچاری ٹی وی پر تڑپ رہی ہے! میانوالی کی تقریر ان ن لیکی چوروں کے پچھواڑے میں گھس گئی!!!👍💪🏻 https://t.co/SaIVHZXiGx	Daddo Charger got loose motion again!!!😃🤣 The poor thing is on TV! Mianwali's speech went into the back of these leaky thieves!!!👍💪🏻 https://t.co/SaIVHZXiGx	NIL	NIL	Hate
1578764357772906497	نثار تیری چہل پہل پر ہزاروں عیدیں ربیع الاول سواۓ ابلیس کے جہاں میں سبھی تو خوشیاں منا رہے ہیں #امد_رسولﷺ_مرحبا #آمدنبی_الملحمه_مرحبا https://t.co/L9hR2Ybkbh	Thousands of Eid Rabi-ul-Awwal on your walk Everyone is celebrating except Iblees #Amd_Rasul ﷺ_Merbah #امدنبي_الملحمه_مرحبا https://t.co/L9hR2Ybkbh	کت راو ھا سو سشتتو ری کی ا کے مم ۔ 7 ای نب لام ا ار بعر ا کا سا کے او قش کی 1لم پیک 9ٹ .حم 0ے را اب ےہ ا ے ا مر لن وب 1ے س ٭٥٠))‏ و0 اد:۴۰ ۱6۲۸۸۸۸۷۸ ق 13۱ء016۰ د۰(١۸۸۰‏ ۱۱۸۶۱۱۲۱ ھا	Kat rao ha so sishttu ri Of A Mmm. 7 E-Nab Lam A Ar baar a ka sa k Oh, of Qash 1 Lum Pack 9T .Ham 0 Now Eh Amer Lin Web 1 (*50)) (1880) (11861121)	No_Hate
1573238545036222464	نکاح کرو اور زنا سے بچو تا کہ لفافہ صحافی اور پی ڈی ایم جیسے لوگ اور لیڈر پیدا نہ ہو😊 https://t.co/mt2gZhrURR	Get married and avoid adultery so that people and leaders like envelope journalists and PDM are not born 😊 https://t.co/mt2gZhrURR	بھادٹی سائی چائل ضریر ہیں جن اپ 0" کے ادا لہ پکنتای عائی جائل تھی ہیں اور فدار کی	Bhadti Sai Chail is the zareer Jin up 0" pay Lah Pakkantai Ai Jail Thi Hain and Fidar Ki	Hate
1614476207873224705	# اقوام متحدہ کی معاون کا کہنا ہے کہ #طالبان کی طرف سے خواتین کے حقوق کی خلاف ورزیوں کے خلاف سلامتی کونسل میں اتحاد ضروری ہے۔ https://t.co/RRdq332S4K @MilapNN #Afghanistan #Taliban #AfghanWomen #UNSC https://t.co/vHhx86DKnE	#UN aide says Security Council unity is essential against #Taliban violations of women's rights. https://t.co/RRdq332S4K @MilapNN #Afghanistan #Taliban #AfghanWomen #UNSC https://t.co/vHhx86DKnE	NIL	NIL	No_Hate
1614307786459947011	ہر خاندان میں ایسی ایک عورت ضرور موجود ہوتی ہے۔جس کی لینے کے چکّر میں ہر بڑا اور چھوٹا لگا رہتا ہے۔یا پھر کم عمر لڑکے انکے نام کی مُٹھ لگا رہے ہوتے ہیں ۔میرے خاندان میں میری بڑی باجی ہیں اور آپ کے خاندان میں ایسا کون ہے ؟ https://t.co/JeREMmzdat	In every family, there must be such a woman. Every young and old is trying to get her. Or young boys are making fists of her name. In my family, I have my elder sister and your family. Who am I? https://t.co/JeREMmzdat	NIL	NIL	Hate
1558896104225345543	#14_اگست_2022_یوم_آزادی_پاکستان ہزاروں پھول سے چہرے جھلس کے خاک ہوئے بھری بہار میں اس طرح اپنا باغ جلا ملی نہیں ہے ہمیں ارض پاک تحفے میں جو لاکھوں دیپ بجھے ہیں تو یہ چراغ جلا https://t.co/LsijaAIzb7	#14_August_2022_Pakistan_Independence_Day Faces were covered with thousands of flowers Burn your garden like this in full spring We have not received the land as a gift If millions of lamps are extinguished, this lamp will be lit https://t.co/LsijaAIzb7	NIL	NIL	No_Hate
1558446301028679681	جب تک منــزل نہ ملـــے تب تک ہمّت مت ہارو کیونکہ پہاڑ ســے نکلنے والــی ندیوں نـے آج تک راستــے میں ڪسی ســے نہیــں پوچھا سَمندر کتنی دور ہـــے۔ #پاکستان_توآبادرہے https://t.co/ij4CyspBmb	Don't give up until you find your destination, because the rivers coming out of the mountain have not asked anyone on the way how far the sea is. #Pakistan_toabadrahe https://t.co/ij4CyspBmb	الات / ا2ا 8 نا6 ن12 ارد	Alaat / A2a 8 Na6 N12 Ard	No_Hate
1567445394702876672	عربی کہاوت ہے کہ اگر تم مرنا چاہتے ہو تو خود کو سمندر میں پھینک دو، تو تم دیکھو گے کہ تم خود کو بچانے کی کوشش کر رہے ہو, تب تم جانو گے کہ تم خود کو نہیں مارنا چاہتے بلکے تمہارے اندر کوئی "شے" ہےجسے تم مارنا چاہتے ہو https://t.co/6KoPac0JvK	There is an Arabic saying If you want to die, throw yourself into the sea, then you will see that you are trying to save yourself, then you will know that you do not want to kill yourself, but there is something inside you that you want to kill. Want https://t.co/6KoPac0JvK	NIL	NIL	No_Hate
1564901484042633217	@hinaparvezbutt قوم کی بیٹی جہاں جاتی ہے فراڈیا ، فراڈ کرکے واپس آتی ہے ، #نانی_420 https://t.co/oTit5OuImi	@hinaparvezbutt Where the daughter of the nation goes, Fradia returns fraudulently. #Nani_420 https://t.co/oTit5OuImi	NIL	NIL	Hate
1606413509436252160	عمران خان نیں کہا 23 دسمبر کو پنجاب اور KPK اسیمبلیز تحلیل کرونگا تو بھڑوے حاجی اور حافظ نیں PDM کے بھڑوں سے پنجاب چیف منسٹر کو معطل کروا کر بھڑوے قاضی کو معطل چیف منسٹر کو بحال کرنے کا حکم دیدیا😂 یہ ہیں ماں کے لوڑے پاکستانی مسلمان جن کا سامنا مومن عمران خان کرنے پر مجبور ہے😡 https://t.co/2PJdHegqJq https://t.co/xD22oQLryd	Imran Khan did not say that he will dissolve the Punjab and KPK Assemblies on December 23, then Bharwe Haji and Hafiz suspended the Punjab Chief Minister from the PDM cadres and ordered Bharwe Qazi to reinstate the suspended Chief Minister. These are the motherless Pakistani Muslims whom Momin Imran Khan is forced to face😡 https://t.co/2PJdHegqJq https://t.co/xD22oQLryd	مومن جس کے خلاف پاکستانی مسلمان فوجی, سیاستدانء ججز اور صحافی اکھٹے ہوگے ہیں یہ جانتے ہوئے بھی کہ اللہ مومن کا ساتھہ دیتا ہے 6	Believers against which Pakistanis Muslim soldiers, politicians Judges and journalists will be together knowing that Allah Supports the believer 6	Hate
1614254817098215424	گرینڈ شمولیتی پروگرام وڈیرہ حیر دین بگٹی نصیر آباد: پاکستان پیپلزپارٹی بلوچستان کے رہنما سردارزادہ بابا غلام رسول عمرانی کی سربراہی میں گوٹھ وڈیرہ حیر دین بگٹی ربی شاخ میں شمولیتی تقریب کا انعقاد ۔ @BabaUmranii @BBhuttoZardari https://t.co/5DKlHv1x9S	Grand Inclusion Program Vadira Heer Deen Bugti Naseerabad: Under the leadership of Sardarzada Baba Ghulam Rasool Imrani, the leader of Pakistan People's Party Balochistan, a joining ceremony was held in Goth Wadira Heer Din Bugti Rabi branch. @BabaUmranii @BBhuttoZardari https://t.co/5DKlHv1x9S	NIL	NIL	No_Hate
1566877904205762562	ہزارہ برادری سے تعلق رکھنے والی بلوچستان کی بیٹی جالیلا حیدر نے چند دنوں میں وہ کر دکھایا جو ہم سب نے کرنا تھا ۔ نہ تشہیر ، نہ القابات ، نہ کسی کی نمود و نمائش ۔ بے لوث صبح شام ہر بے سہارا کو سہارا دینے پہنچ گئے ۔ ہمارے لیے ان سے سیکھنے کے لیے بہت کچھ ہے سیلاب متاثرین کی https://t.co/xXsw7P7qHX	Jalila Haider, a daughter of Balochistan belonging to the Hazara community, did what we all had to do in a few days. No publicity, no titles, no exposure of anyone. Selflessly, morning and evening, they reached to support every helpless person. We have a lot to learn from the flood victims https://t.co/xXsw7P7qHX	NIL	NIL	No_Hate
1574391795869536256	@ProudPunjabi10 @iihtishamm انکی سرغنہ یہودن مرتد ہے اسکے گھر کا گھیراو روزانہ کیا جایے https://t.co/SnUtn45mKS	@ProudPunjabi10 @iihtishamm their leader is a Jewish apostate, his house should be surrounded daily https://t.co/SnUtn45mKS	NIL	NIL	Hate
1587475084284919808	وہابیت کی سعودی پشت پناہی کے حوالے سے تہلکہ خیز انکشاف! سرد جنگ کے دور میں مغرب کی جانب سے سعودی عرب کو درخواست کی گئی کہ وہ روس کا مقابلہ کرنے کے لیے دنیا بھر میں موجود مدارس کو فنڈنگ کرے تا کہ وہابی ازم کو فروغ دیا جا سکے۔ محمد بن سلمان کا اعتراف #SaudiArabia https://t.co/aZkszCQLDC	Dangerous disclosure regarding the Saudi support of Wahhabism! During the Cold War, Saudi Arabia was requested by the West to counter Russia by funding madrasas around the world to promote Wahhabism. Confession of Mohammed bin Salman #SaudiArabia https://t.co/aZkszCQLDC	NIL	NIL	No_Hate
1558467508356669440	میاں محمّد شہباز شریف آج رات نو بجے قوم سے خطاب کرے گے انشاءلله آج پھر پٹرول اور ڈیزل سستا ہو گا @CMShehbaz https://t.co/ETm7OduJbN	Mian Muhammad Shahbaz Sharif will address the nation tonight at 9 o'clock, God willing, petrol and diesel will be cheap again today. @CMShehbaz https://t.co/ETm7OduJbN	NIL	NIL	No_Hate
1606669815044767746	تبارک حسین سمیت دیگر افراد کے خلاف درج ہونے والی ایف آئی آر کی سخت الفاظ میں مذمت کرتے ہیں. ناجائز قابض پاکستانی سیکیورٹی فورسز گلگت بلتستان میں زمینوں پر ناجائز قبضے کر رہے ہیں، اس کے خلاف احتجاج کرنے والے مظاہرین پر ایف آئی آر درج ہو رہے ہیں. @a_siab @HamidMirPAK @UsamaKhilji https://t.co/VCpuykNoFu https://t.co/ubvmbMyMSe	We strongly condemn the FIR registered against Tabarak Hussain and others. Pakistani security forces are illegally occupying lands in Gilgit-Baltistan, and FIRs are being registered against the protestors who are protesting against it. @a_siab @HamidMirPAK @UsamaKhilji https://t.co/VCpuykNoFu https://t.co/ubvmbMyMSe	NIL	NIL	Hate
1581382154809794560	امیر شہر کی فقط مجھ سے اتنی لڑائی ہے میں وہ سر بناتا ہوں جنہیں جھکتا نہیں آتا #بلے_پہ_ٹھپہ https://t.co/XTM2Fku499	Amir Shahr only has so much fight with me I make heads that cannot be bowed #বল্য_প়া_তাপ্ত https://t.co/XTM2Fku499	NIL	NIL	No_Hate
1616922345385476096	@HaroonNatmam یہ بے غیرت بے شرم بے حیا کوکینی واشل بونڈا منافق کون ہے https://t.co/hauEL9LzKI	@HaroonNatmam Who is this shameless cowardly cowardly vassal bonda hypocrite https://t.co/hauEL9LzKI	NIL	NIL	Hate
1614361819048550400	غلاظت کا ڈھیر https://t.co/9GQMV6WhRi	Pile of filth https://t.co/9GQMV6WhRi	NIL	NIL	Hate
1559798380913741824	محرم میں شیعہ کے عورتوں کی حرکتیں دیکھیں #آستغفراللہ https://t.co/D72YO6BiAz	See the actions of Shia women in Muharram #استغفر الله https://t.co/D72YO6BiAz	NIL	NIL	Hate
1566740903347343362	امریکی کانگریس کے وفد کی سیلاب کی تباہ کاریوں پر تشویش، مشکل وقت میں پاکستان کے ساتھ مکمل تعاون کااعادہ https://t.co/Squ4RRpaTs https://t.co/AUe89dm8Ua	The American Congress delegation is concerned about the flood disasters, reiterating full cooperation with Pakistan in difficult times https://t.co/Squ4RRpaTs https://t.co/AUe89dm8Ua	NIL	NIL	No_Hate
1563938806335787014	ہر پرندہ اپنے جھنڈ میں اچھا لگتا ہے۔ شاہین شاہین کے ساتھ اور کوا کوے کے ساتھ اچھا لگتا ہے۔ قسط نمبر 12 https://t.co/QHHmdTHO1T	Every bird looks good in its flock. Shaheen goes well with Shaheen and Crow with Crow. Episode #12 https://t.co/QHHmdTHO1T	NIL	NIL	No_Hate
1578796984948822017	پشاوری چپل ، جینز کوٹ اور چائے مے بسکٹ ڈبو کر کھانا۔۔❤ https://t.co/NCUyzQsLbR	Peshawari chappal, jeans coat and chai mee biscuit dipping food.❤ https://t.co/NCUyzQsLbR	صسحطظ صمندہ	Sashataz Samanda	No_Hate
1594184809454002177	عمران خان نے سینیٹر اعظم سواتی کے حوالے سے کہا کہ منہ بند کرنے کے لیے میاں بیوی کی ویڈیو گھر بھیجی گئی اور سینیٹر کو برہنہ کرکے تشدد کیا گیا اور اسے کہا گیا کہ عمران خان کا ساتھ چھوڑ دو۔ #حقیقی_آزادی_فائنل_کال https://t.co/0wcjCZ43gY	Imran Khan said with reference to Senator Azam Swati that the video of the husband and wife was sent home to silence him and the senator was stripped naked and tortured and told to leave Imran Khan's side. #Haqqiqi_Freedom_Final_Call https://t.co/0wcjCZ43gY	اق پان یا نے کے لے کے جے اتی خوددارییکیمنزل کے پا وم ٭نکلو_حقیقی_آزادی_کیلئے وع 1 چا راولےنڈی 4ہ ‎٢‏ ا جی ‎٠‏ * رق ا ا و	Aq pan ya ne k le k j The feet of that self-righteous manzil Get out for real freedom And 1 Cha Rawlandi 4h 2 aj 0 * Raqqa	No_Hate
1613815677651148805	دشمن قوتیں عوام پاکستان اور افواج پاکستان کے درمیان فاصلے پیدا کرنے کے حوالے سے اپنے تمام تر مذموم عزائم میں ناکام رہیں ہیں #پاک_فوج_عوام_کی_فوج https://t.co/P0sb4ztUKK	The enemy forces have failed in all their nefarious intentions to create distance between the people of Pakistan and the Pakistan Army #Pak_Forge_Awam_Ki_Forge https://t.co/P0sb4ztUKK	جنوری 2022 میں 7۴-7 میں بر تال ی طو نان رے ستاڑہ دی 00/7 نے وع نے اچنا تی -	74-7 in January 2022 Satara gave 00/7 achna ti -	No_Hate
1561427834790219776	@RehamKhan1 عمران خان اس فاحشہ کو بنی گالہ کے گیٹ تک لایا اور پھر چوتڑ پہ ایسی لات ماری کے سیدھی حنیف عباسی کو گود میں گری جب سے ہی یہ گود گود بھٹکتی پھر رہی ہے فارغ ہونے والوں کا وکٹری نشان باقی ویٹنگ میں ہیں👇 https://t.co/RgJrshciI5	@RehamKhan1 Imran Khan brought this prostitute to the gate of Bani Gala and then after kicking her in such a way she fell straight into Hanif Abbasi's lap since then she has been wandering around. The victory sign of the graduates is still waiting 👇 https://t.co/RgJrshciI5	NIL	NIL	Hate
1563513325572730881	معروف کتاب پبلشر، بلوچی شاعر اور صحافت کے طالب علم لالہ فہیم بلوچ کو گزشتہ روز ان کی بک شاپ سے اغوا کر لیا گیا تھا۔ ہم غیر قانونی حراست کی مذمت کرتے ہیں اور ان کی بحفاظت بازیابی کا مطالبہ کرتے ہیں۔ #ReleaseLalaFaheemBaloch #SaveLalaFaheem #EndEnforcedDisappearances https://t.co/b6ykSuUR3b	Well-known book publisher, Balochi poet and journalism student Lala Faheem Baloch was abducted from his bookshop yesterday. We condemn the illegal detention and demand their safe recovery. #ReleaseLalaFaheemBaloch #SaveLalaFaheem #EndEnforcedDisappearances https://t.co/b6ykSuUR3b	ہ-- ا 0000 ۳۷۱۱۷ یں رر رٹ 1 7 ج0س7 ا ۹ ۱ ۲ ۲ ا۳۶۱ 71 1043 0( ا 0۳ ۲	H-- A 0000 37117 RR 1 7 j0s7 a 9 1 2 2 A 361 71 1043 0( A 03 2	Hate
1607501309585854467	“جماعت احمدیہ کے لیے یہ بہت فکر کا مقام ہے کیونکہ ایک طرف تو لاکھوں آدمی انہیں کافر کافر کہتے ہیں دوسری طرف اگر یہ بھی خدا تعالی کی نظر میں مومن نہ بنے تو دوہرا گھاٹا ہے۔” - حیات طیبہ ص ۳۵۲- https://t.co/f5Q1rAGsWy	"This is a point of great concern for the Ahmadiyya Jamaat because on the one hand, millions of people call them unbelievers, on the other hand, if they do not become believers in the eyes of God Almighty, then it is a double loss." - Hayat Tayyaba p. 352- https://t.co/f5Q1rAGsWy	NIL	NIL	No_Hate
1613547348386545664	ایف سی بلوچستان (نارتھ) کی جانب سے ڈیرہ بگٹی میں جرگہ منعقد ہوا جس میں قبائلی علاقے والوں نے علاقے میں قیام امن اور بھتہ خوری کےخلاف موثر اقدامات کرنے پر ایف سی کی کاوشوں کو سراہا۔ جس میں علاقے والوں نے تعلیم، صحت اور صاف پانی کی فراہمی کے مسائل کے حل کیلئے ایف سی کو https://t.co/PZOVokGGiK	FC Balochistan (North) held a jirga in Dera Bugti in which the people of the tribal area appreciated the efforts of FC for maintaining peace in the area and taking effective measures against extortion. In which the people of the area asked FC to solve the problems of education, health and clean water supply https://t.co/PZOVokGGiK	NIL	NIL	No_Hate
1593859316095778816	سرٹیفائڈ چور خاندان #گھڑی_چور_شرم_کرو https://t.co/gHR0YIljTw	Certified thief family #shame_the_watch_thief https://t.co/gHR0YIljTw	۱ -07۰م ۲ 18-8 (6۲3۱۷) ۷۷/۸۷۱۰۱ ہ0 ویر کٰا6ا11ںح ٤ہ‏ ہوم ‎٦‏ ۷( 006 8 کان مس لیکن سو شل میڈیا ٹیم ود ی عرب	1-070M 2 18-8 (62317) 77/87101 H0 Home 6 7 (006 8 Kan Miss Lakin Su Shil Media Team with Arab	Hate
1617300837683941376	@hinaparvezbutt @MohsinNaqvvi مبارک باد کو چھوڑ اب اس حرامی کے ساتھ راتین گزار کیونکہ تم کو ن لیگ نے رکھا ھی اسی لیے ھے کھسرے https://t.co/6AkE6oEDSX	@hinaparvezbutt @MohsinNaqvvi Leave Mubarak and now spend the night with this bastard because you are hired by PML that is why Khasre https://t.co/6AkE6oEDSX	NIL	NIL	Hate
1617831207366184960	میڈم نور جہاں کا یہ لعنتی پتر ہمیں 12 ارب روپے میں پڑا ہے 🙄🙄🙄🙄اب دیکھیں موجودہ کتنے میں پڑے گا ☹️👇👇 https://t.co/n7MN4zhqNA	This cursed letter of Madam Noor Jahan has cost us 12 billion rupees 🙄🙄🙄🙄 Now see how much it will cost now ☹️👇👇 https://t.co/n7MN4zhqNA	NIL	NIL	Hate
1608146527465385986	@ashirazeemgill اگر تیری رن ٹرک چلا کر گھر آگئی ہو تو بتا دے ہر یوتھیا! تجھ چوتیے! کے گھر جا کر اس کے ہاتھ سے کھائے گا بلکل اس طرح 👇🏽👇🏽👇🏽👇🏽👇🏽 https://t.co/sRoxYLwLr2	@ashirazeemgill If your run came home by driving a truck, tell me every Yuthia! Fuck you! He will go to his house and eat from his hand exactly like this 👇🏽👇🏽👇🏽👇🏽👇🏽 https://t.co/sRoxYLwLr2	NIL	NIL	Hate
1567061827745456128	مغرب کا سارا حسن زائل ہو جاتا ہے،،، ☺ جب اک مسلمہ کے چہرے پر حجاب اور مسلم کے چہرے پر سنت رسولﷺ سجتی ہے...😇❣️ #سعدساڈا_شیراے https://t.co/3XrobcCncG	All the beauty of the West disappears,,, ☺ When the hijab is placed on the face of a Muslim woman and the Sunnah of the Prophet (PBUH) is placed on the face of a Muslim...😇❣️ #سادسادا_شيراي https://t.co/3XrobcCncG	NIL	NIL	No_Hate
1581398986900271104	پتا نہیں لوگ کیسے بتا دیتے ہیں ایک دوسرے کو کہ میں نے یہ کیا وہ کیا 😂🙄 میں نے ابھی برگر کھایا کسی کو بتایا 🙄🙂😎 https://t.co/S4pHEtlnT9	I don't know how people tell each other that I did this and that I just ate a burger and told someone 🙄🙂😎 https://t.co/S4pHEtlnT9	NIL	NIL	No_Hate
1572644710459777024	پشین تحصیل کاریزات ۔جمیعت علماء اسلام کے ضلعی امیر مولانا عزیز اللہ حنفی صاحب ممبر صوبائی اسمبلی حاجی عبدالواحد صدیقی صاحب جمعیت طلباء اسلام تحصیل کاریزات کے زیراہتمام منعقدہ انقلاب مصطفی صلی اللہ علیہ وسلم کانفرنس کے شرکا سے خطاب کررہے ہیں https://t.co/5nWkOAWNj4	Pusheen Tehsil Karizat, District Amir of Jamiat Ulema-e-Islam, Maulana Azizullah Hanafi, Member of the Provincial Assembly, Haji Abdul Wahid Siddiqui. Organized under the auspices of Jamiat Al-Islam Tehsil Karizat The Revolution Mustafa (peace be upon him) addressing the participants of the conference https://t.co/5nWkOAWNj4	NIL	NIL	No_Hate
1580169659814277120	let`s come with me تاکہ منافقت مکاری اور ظلم جبر کے راز فاش کرنے کے ہنر کی حاصلات تک پہنچ سکیں https://t.co/llRQ2Gtxc4	Let's come with me So that they can reach the achievement of the skill of revealing the secrets of hypocrisy, deceit and oppression https://t.co/llRQ2Gtxc4	NIL	NIL	No_Hate
1578791004215599104	الحمد للہ اہل سنت کی مشترکہ کانفرنس میں تمام احباب نے ٹرانسجینڈر ایکٹ کے خلاف احتجاج میں ساتھ دینے کا اعلان کیا اور لبرل سیکولر پارٹیرز کا ہمیشہ کے لئے ساتھ چھوڑنے کا اعلان کر دیا @moavia_official @hishamelahi https://t.co/9LFZbJE8jg	Alhamdulillah, in the joint conference of Ahl-e-Sunnah, all the friends announced to support the protest against the Transgender Act and announced to leave the liberal secular parties forever. @moavia_official @hishamelahi https://t.co/9LFZbJE8jg	NIL	NIL	No_Hate
1562960233315856384	🌹🌾🌹🌾🌹🌾🌹🌾🌹🌾🌹🌾 ✨🪷✨🪷✨🪷✨🪷✨🪷✨🪷 🌸اسلام وعلیکم ورحمتہ اللہ وبرکاتہ🌸صبح بخیر 🍁 💐جمعہ مبارک💐 🌹نبی کریمﷺ کی محبت میں اگر جان بھی چلی جائے تو یہ گھاٹے کا سودہ نہیں دین کے راستے میں اگر مشکلات آ جائیں تو حضرت بلال حبشی جیسی ہستیوں کی زندگی پر نگاہ ڈالنی۔🌺 https://t.co/DRK96EXPux	🌹🌾🌹🌾🌹🌾🌹🌾🌹🌾🌹🌾 ✨🪷✨🪷✨🪷✨🪷✨🪷✨🪷 Islam wa alaikum wa rahmatullah wa barakatah good morning 🍁 Happy Friday Love of Prophet Even if I die, I will lose it If the deal is not in the way of religion If difficulties come, Hazrat Bilal Habshi A glimpse into the lives of such personalities.🌺 https://t.co/DRK96EXPux	NIL	NIL	No_Hate
1577580519449051136	@SocialDigitally #جاتی_امراء_کی_بھگوڑی نائکہ جو طوائفوں کے ذریعے اہم شخصیات کی گندی ویڈیوز بنوا کر اُن کے ذریعے اُنھیں بلیک میل کرکے اپنی کرپشن کے کیسسز بند کرواتی ہے #این_آر_او_ٹو_نامنظور #جاتی_امراء_کی_بھگوڑی https://t.co/Zuchy4Z9LA	@SocialDigitally #Jati_Amraa_Ki_Bhaguri Nayaka who important through prostitutes By making dirty videos of celebrities By blackmailing them through them It closes its corruption cases #nr_o_to_disapproved #Jati_Amraa_Ki_Bhagoori https://t.co/Zuchy4Z9LA	۰ئ“ لے کر بھاگ گیا تھا اس کا جواب بھی آپ کو دینا ہو گا قمر جاوید باجوہ صاحب ار ج	0 He ran away You will also have to answer this Mr. Qamar Javed Bajwa Ar C	Hate
1564314495081922560	سالے بہن چود ان مادر چودو کی شکلیں دیکھو یوتھیوں اب آنکھیں نہیں اپنی گانڈ کھولو کیونکہ عقل اور شرم تم کو آنی نہیں #پاکستان_کےغدار_بے_نقاب https://t.co/gwRuLMVBob	Fourteen year old sister Look at the shapes of these mother fours You have no eyes now, open your asses Because wisdom and shame will not come to you #Pakistan_Keghadar_Bay_Naqab https://t.co/gwRuLMVBob	NIL	NIL	Hate
1573613643513602050	تمہاری راہ نہ دیکھوں تو پھر کبھی شاید مجھے خیال یہ آئے کہ چل تو سکتا ہوں میں اک دیا ہوں بہت منتظر ہواؤں کا بجھایا جاؤں نہ جب تک میں جل تو سکتا ہوں مجھے پہاڑ کے دامن میں رکھ دیا تو نے میں چشمہ بن کہ کبھی پر ابل تو سکتا ہوں https://t.co/d8eZUcQL9u	If I don't see your way, maybe never again I thought that I could go I am one of the days waiting for the winds Do not be extinguished while I can burn You placed me at the foot of the mountain I am a fountain that I can boil at once https://t.co/d8eZUcQL9u	NIL	NIL	No_Hate
1574424847723028481	میاں نواز شریف کا ببر شیر ایم۔پی اے بیرسٹر ملک صہیب احمد بھرتھ صاحب سابق وائس چئیرمین بلدیہ بھیرہ کے ہمراہ حلقے کے دورے کے دوران میاں نواز شریف کے چاہنے والوں سے ملاقات کی انکے مسائل سنے اپ نے کہا ن لیگ ملک کی معیشت کی بہتری کے لیے دن رات محنت کر رہی ہے اس کے ثمرات جلد عوام کو https://t.co/EvUxCF6s6S	Mian Nawaz Sharif's Babbar Sher M.P.A. Barrister Malik Soheb Ahmed Bharat Sahib along with former Vice Chairman Baldia Bhaira met the fans of Mian Nawaz Sharif during his visit to the constituency. She is working day and night for the fruits of which will be shared with the public soon https://t.co/EvUxCF6s6S	NIL	NIL	No_Hate
1560872336462602240	@geonews_urdu عمران نیازی یہودی قادیانی زندیق کا ماضی زنا کاریوں ،نشه خوری ،کرپشن سے بھرا پڑا ہے اور یہودیوں کا داماد ہونے کے ساتھ ساتھ اس مرتد مرزائی کے ننھیال مرزے کانے دجّال کی اولاد سے ہے اس کتے سے گستاخوں کی حمایت کے علاوہ کیا توقع کی جا سکتی ہے https://t.co/YIgpsPPwSN	@geonews_urdu Imran Niazi Jewish Qadiani Zandiq's past is full of adultery, drunkenness, corruption and besides being the son-in-law of Jews, this apostate Mirzai's son-in-law is the son of the Dajjal. Can be done at https://t.co/YIgpsPPwSN	NIL	NIL	Hate
1566722634108309506	آپ کے ہوتے ہوئے تو کچھ نہیں ہوسکتا بڑے ابو 🍂🍂 https://t.co/iRB0NDJRht	Nothing can happen without you Big daddy 🍂🍂 https://t.co/iRB0NDJRht	افواجع سے متعلق بیان+عمران خان اپنے لیے مشکلات پد اکر کنا ‎٤‏ اسلام آباد ائیلورٹ	Statement on the forces + Imran Khan for himself 4. Islamabad Ilorat	Hate
1578767568583565313	علم کی سزا ٫قلم و کتاب کی سزا٫ بلوچ ہونے کی سزا💔😪 #NoFeesOnReserveSeatsInIUB #TokenHungerStrikeInIUB @ChiefSecretary https://t.co/JJMKUDON9f	Punishment of knowledge, punishment of pen and book, punishment of being Baloch #NoFeesOnReserveSeatsInIUB #TokenHungerStrikeInIUB @ChiefSecretary https://t.co/JJMKUDON9f	NIL	NIL	Hate
1594140556170768385	کبھی مایوس نہ ہونا انشاءاللّٰہ فتح حق کی ہوگی جئے مہاجر جئے الطاف #AltafNeedsJustice https://t.co/DBlU1bI6sS	Never be disappointed God willing Victory will be right Jai Mahajir Jai Altaf #AltafNeedsJustice https://t.co/DBlU1bI6sS	بھی و یر یں جزیوں گی آندعیاں ول شں ہعارا عبر جھ ٹوٹا نو قامت ہوگی 7	There will also be other parts 7	No_Hate
1596195892087861248	وفاقی شری عدالت میں خواجہ سراؤں کے قانون کے متعلق درخواست کی سماعت ہوئی۔ یہ سماعت چیف جسٹس شریعت کورٹ اسلام آباد سید...👇 https://t.co/3nZ2qRcjmJ #NationalNews #25thnov2022 #FederalShariaCourt #TransgenderBill #transgenderfolks #TVN #TVNUrdu #TVNNational #TheViewsNetwork https://t.co/SJnowhDViR	A hearing was held in the federal court regarding the transgender law. This hearing Chief Justice Shariat Court Islamabad Syed...👇 https://t.co/3nZ2qRcjmJ #NationalNews #25thnov2022 #FederalShariaCourt #TransgenderBill #transgenderfolks #TVN #TVNUrdu #TVNNational #TheViewsNetwork https://t.co/SJnowhDViR	NIL	NIL	No_Hate
1592970151103991808	ڈھیٹ کنجر خان نازی۔۔ https://t.co/bPcXd6qEe3	Dhet Kanjar Khan Nazi. https://t.co/bPcXd6qEe3	جو بھی چاہیں مجھکو الزام دیجیۓ	Blame me whoever you want	Hate
1587463091452891136	اختلاف آپ کا حق ہےضرور کریں اختلاف کے نام پر تنقیداور طنز آپ نہیں کر سکتے ہیلووین آپ منائیں جس طرح مرضی منائیں ننگے ہو یا شیطان کا روپ دھار لیں بشری بی بی کےحجاب پردے کو طنزیہ استعمال کرنا جائز نہیں اور ناں ہی اس حرکت کو سراہا جا سکتا ہےاورنہی اس کسی قسم کی جسٹیفیکیشن قابل قبول https://t.co/mt65d5RSQm	Disagreement is your right. Make sure you don't criticize and ridicule in the name of disagreement. You can celebrate Halloween as you like, be naked or dress up as a devil. It is not permissible to use Bushra Bibi's hijab as a mockery, nor should this act be appreciated. Any kind of justification is acceptable https://t.co/mt65d5RSQm	یر ۵ ۹83 م۱۷۸۲ [: 8۵	Yer 5 983 AD 1782 [: 85	No_Hate
1564997149443690496	سابقہ صدر عوامی مسلم لیگ ھزارہ سردار بلال خان چند روز میں صوبائی صدر اور صوبائی جنرل سکرٹری پاکستان تحریک انصاف( کے پی کے)کے ہمراہ چئرمین پاکستان تحریک انصاف عمران خان سے ملاقات کے بعد پاکستان تحریک انصاف میں با قائدہ شمولیت کا اعلان کریں گے منجانب:ٹیم بستی سردار گلزمان خان https://t.co/8aKCBbJZ6d	Former President Awami Muslim League Hazara Sardar Bilal Khan will announce his joining Pakistan Tehreek-e-Insaf in a few days after meeting Chairman Pakistan Tehreek-e-Insaf Imran Khan along with Provincial President and Provincial General Secretary of Pakistan Tehreek-e-Insaf (KPK). By: Team Basti Sardar Gulzaman Khan https://t.co/8aKCBbJZ6d	NIL	NIL	No_Hate
1580168174989107200	امپورٹڈ حکومت کا خوف عمران خان سے۔ https://t.co/qumKfpx6W5	Imported government's fear of Imran Khan. https://t.co/qumKfpx6W5	یہ کراچی یا گوادر کی بندر گاہ نہیں بلکہ تجربہ کار حکومت نے 5 دن کے اندر اسلام آباد میں نئی بندر گاہ بنا لی.. 3ع اب بس سمندر کو لانا باقی ہے جو کپتان لائے گا.. انشاءالله. ۴9	This port of Karachi or Gwadar No, but experienced government New in Islamabad within 5 days Built a harbor.. 3 A.D Now all that remains is to bring the sea The captain will bring.. God willing. 49	Hate
1594153379541839873	فَقیرِ عِشق ہُو ں اِک دَر سے لَگا بیٹھا ہُوں. بِھکاری ہوتا تو دَر دَر پے پَڑا مِلتا میں . #صبح_بخیر https://t.co/4uUmXoFfAh	I am poor in love, I am sitting by a door. If there was a beggar, he would be lying in the dirt. #goodmorning https://t.co/4uUmXoFfAh	NIL	NIL	No_Hate
1617814488945917953	ردعمل دینے میں بھی خان کی نقل کپتان تمہارے اعصاب پہ سوار ہوگیا ھے وہ کمینہ جو دوائی لینے گیا تھا آجکل قمیض پر اٹوگرف دیتا پھر رہا ھے https://t.co/TThgFJqeUX https://t.co/EmtALYVMfW	Imitation of Khan in giving a response The captain has got on your nerves The bastard who went to get medicine is now giving thumbs up on his shirt https://t.co/TThgFJqeUX https://t.co/EmtALYVMfW	NIL	NIL	Hate
1577954084111278082	تصویر پر جائیں!!! امریکی طیاروں نے آج شام دیر الزور کے علاقے میں بمباری کی، جامع مسجد بھی وحشیانہ بمباری میں شہید ہوئی۔ اور قرآن پاک کے اوراق کو ٹکڑے ٹکڑے کر دیا۔ لیکن اللہ کی شان دیکھو قرآن پاک کا شہید صفحہ، آج بھی مسلمانوں کو جہاد کی دعوت دے رہا ہے ☝️ https://t.co/nUyn4hea5h	Go to the picture!!! American planes bombed the area of ​​Deir ez-Zor this evening. The Jama Masjid was also martyred in the brutal bombardment. And tore the pages of the Holy Quran into pieces. But look at the glory of Allah, the martyr page of the Holy Quran, is still inviting Muslims to Jihad ☝️ https://t.co/nUyn4hea5h	NIL	NIL	No_Hate
1564215201972555778	ننگا کھڑا جھاڑے میں،کوئی آہے کپڑے اتار لے۔ کپتان نے انھیں ننگ منگا کر دیا ہے۔ حرام دولت وبال اے جان ہے۔ ایسی زلت سے تو موت اچھی۔ https://t.co/IaKpDXoOQH	Standing naked in the bush, someone wants to take off his clothes. The captain has unmasked him. Forbidden wealth is evil. Death is better than such evil. https://t.co/IaKpDXoOQH	NIL	NIL	Hate
1595816078491680773	وزیراعظم پاکستان کے تاریخی زبردست فیصلے پوری قوم خوشی سے نِہال ایسا انتخاب جن کا کوئی ثانی نہیں جو اپنی مثال آپ ھیں آرمی چیف جرنل پاکستان عاصم منیر صاحب جرنل ساحر شمشاد مرزا صاحب چیرمین جوائنٹ سٹاف چیف اللہ کے کرم سے ملک صیح پٹری پر چڑھ گیا سب کرپٹ اپنی خیر منالیں کڑا احِتساب https://t.co/dsC8Si2yGA	Historic great decisions of the Prime Minister of Pakistan The whole nation rejoiced A choice that has no second, which is your example Army Chief Journal Pakistan Asim Munir Sahib Journal Sahir Shamshad Mirza Sahib Chairman Joint Staff Chief By the grace of Allah, the country got on the right track All the corrupt take responsibility https://t.co/dsC8Si2yGA	NIL	NIL	No_Hate
1561647284986724352	@hinaparvezbutt پاکستان کا سب سے بڑا مداری اور نوسر باز بندہ پاکستانی سیاست کا سیاہ ترین اور گھٹیا ترین ایک باب شریف چور https://t.co/DUq2tvmm3w	@hinaparvezbutt Pakistan's biggest orbiter And Noser Bazbanda One of the darkest and worst chapters of Pakistani politics Sharif Chor https://t.co/DUq2tvmm3w	NIL	NIL	Hate
1578378458996133888	میراثی کنجر حرامی کا پتر بےشرم بغیرت کتی کا بچہ ہیرا منڈی کی اولاد کتے https://t.co/ivUQEuBLsI https://t.co/EAdrJX8gVt	The son of the heiress Kanjar Harami, the child of the shameless bitch, Heera Mandi Dogs https://t.co/ivUQEuBLsI https://t.co/EAdrJX8gVt	NIL	NIL	Hate
1564223179492556803	اب اسکو کیا بولا جائے آپ خود بتائیں #AsiaCup2022 #سیلاب_زدگان_مددکےمنتظر #منحوس_حکومت #عمران_خان_ٹیلی_تھون_مہم #ghareedafarooqi https://t.co/H76yXQ9Dcf	Now tell him what to say #AsiaCup2022 #سلاب_زدغان_مددكمنتزر #Abominable_Government #Imran_Khan_Telethon_Campaign #ghareedafarooqi https://t.co/H76yXQ9Dcf	NIL	NIL	No_Hate
1566048366227628032	شبانہ اعظٰمی نے بلقیس بانو گینگ ریپ مجرموں کی رہائی کو شرمناک قرار دیا تھا مزید پڑھئے: https://t.co/YGjZ5QUEik #ExpressNews https://t.co/ltwXtfHCSV	Shabana Azami had described the release of Bilqis Banu gang-rape criminals as shameful Read more: https://t.co/YGjZ5QUEik #ExpressNews https://t.co/ltwXtfHCSV	شانہ اششھی اور تح الرین شاو گکڑے گگڑرے دنک کاحصہ ہیں٥‏ پی بج پیا	Shana Ashashi and Teh Al-Rin Shao Gakde Gagdre is part of the sting	No_Hate
1593799619825340417	کسی کو کیا خبر تھی کہ بدنما شکل والا خنزیر ملک کا دیوالیہ نکال دیگا۔ https://t.co/3yF4mTAiKv	Who knew that a pig with a hideous appearance would bankrupt the country? https://t.co/3yF4mTAiKv	NIL	NIL	Hate
1581514934252232705	@Amanullah6064 @Real_SHR9263 نجد کے ناجائز بچے یہ تیرا باپ خود مان گیا کہ تیرا ابا غلامی کرکے جو اوپر سے ملتا ویسے کرتا چابی والے طعنہ بھی وہ دے رہے جنکی بہنیں ڈی چوک پر مجرے کرتی رہی ہیں https://t.co/MjklnrHrU2	@Amanullah6064 @Real_SHR9263 illegitimate children of Najd This is your father who himself admitted that your father would have done what he got from above by being a slave The key people are also taunting those whose sisters have been performing at D Chowk https://t.co/MjklnrHrU2	۷۳ لت ۱ ى جج [--[ھ (۱7۲۰: وہ۱ 5 ساڑ سے ے سال میس 7 ھی پاو بھی خی شی. ران اق بی ا نع زا ڈے داری می ریہ مرا یکسی او ری تی٠‏ عمران	73 Lat 1 Judge [---H (1720: He 1 From 5th to 7th year, the 7th month of May is also good. thigh Aqb ana Za day dari mi riya mara yaksi o ri ti0 Imran	Hate
1564053869264617472	آتے جاتے خوبصورت آوارہ سڑکوں پر کبھی کبھی اتفاق سے کتنے انجان لوگ مِل جاتے ہیں۔۔ https://t.co/ReJ4pWABn2	On beautiful winding roads Sometimes by chance How many unknown people do you meet? https://t.co/ReJ4pWABn2	NIL	NIL	No_Hate
1593191986927894529	@afnanullahkh خنزیر کو خنزیر کہنا گالی نہیں ہے 😉 https://t.co/Wp0EgIj0qV	@afnanullahkh Calling pigs pigs is not abusive 😉 https://t.co/Wp0EgIj0qV	اکتاٹی ڈاکٹ رکا کارنا مہ انمان میں خ رھ کا دل را بر	Aktati docket raka karna mah Believe in Inman The heart of	Hate
1579840913391878144	دنیا میں بہت کم شخصیات ایسی ہوتی ہیں جو کامل طرز حیات رکھتی ہیں۔ جن کا رہن سہن ملنا جلنا اٹھنا بیٹھنا بات چیت لب و لہجہ اخلاق الغرض شخصیت کا ہر پہلو کامل اور بے مثال ہوتا ہے۔انہی خوبیوں اور اعلی اوصاف کے مالک ,محسن گلگت بلتستان جنرل احسان محمود خان صاحب سے ملاقات https://t.co/jJjqlem82d	There are very few personalities in the world who lead a perfect lifestyle. Whose way of life, meeting, walking, sitting, talking, lips and tone, morals, and every aspect of the personality is perfect and unparalleled. The owner of the same qualities and high qualities, Mohsen Gilgit-Baltistan General Ehsan Mehmood Khan met with Sahib https://t. co/jJjqlem82d	NIL	NIL	No_Hate
1564844992421662721	جناب @MoonisElahi6 صاحب آپکی کوٹھی سے 2 چوک چھوڑ کر یہ حالت ہے اندرون گلی محلوں کی، محلہ بخشوپورہ گجرات کہ مکین سخت تکلیف میں ہیں کمیٹی دفتر کہ ساتھ گلی محلوں کی یہ حالت ہے گزارش ہے کہ اپنے ماتحت لوگوں کو ہدایت کریں کہ بارش کہ علاوہ لوگوں کو ایسی پریشانی کا سامنا نہ کرنا پڑے https://t.co/dRrb4mYik7	Mr. @MoonisElahi6 Sir, this is the condition of inner street neighborhoods, 2 blocks away from your house, Bakhshpura Gujarat, residents are suffering. This is the condition of the street neighborhoods next to the committee office Please instruct your subordinates that other than rain, people should not face such problems https://t.co/dRrb4mYik7	NIL	NIL	No_Hate
1593834006033727488	اج جیو نیوز یہ خبر چلانے والے ہیں کہ شوباز نے تھپڑ کھا کر غیرت کے نام پر خودکشی کر لی اور ڈیزل اس کا جنازہ کرے گا #مجھے_تھپڑ_کیوں_مارا @Qursum12 https://t.co/l09Km8mEsu	Aaj Geo News is going to run this news Shobaaz commits suicide by slapping himself in the name of honor and Diesel will perform his funeral #Why did you slap me? @Qursum12 https://t.co/l09Km8mEsu	NIL	NIL	Hate
1561930186760888321	اگلی باری ایسے فتنے کی ھے جو نہ مرد ھے نہ عورت ھے یہ سوات کا خسرا ھے https://t.co/mXdRKpihCY	The next turn is such a temptation Who is neither male nor female This is Swat Measles https://t.co/mXdRKpihCY	NIL	NIL	Hate
1573968731193196545	یہ منافق فتنہ شخص ریاست مدینہ کی بات کرتا ہے بڑے بڑے دعوے کرتا بے شرم کپتان https://t.co/Wf6LgctCDW	This hypocrite person talks about the state of Madinah, makes big claims, shameless captain https://t.co/Wf6LgctCDW	NIL	NIL	Hate
1578005906968948736	شہباز شریف نے کہا ہے کہ عمران خان نے پاکستان سے غداری کی ہے جبکہ علامہ سعد حسین رضوی نے شہباز شریف کی فرانس کے گستاخ صدر سے ملاقات کرنے پر کافر قرار دیا ہوا ہے.. #گستاخوں_کےحمایتی_کنفرم_لعنتی https://t.co/x5XHChwHtm https://t.co/GnHkh73byB	Shahbaz Sharif has said that Imran Khan has betrayed Pakistan while Allama Saad Hussain Rizvi has declared Shahbaz Sharif as an infidel for meeting the insolent President of France. #जस्ताखुन_केहमायती_कृफ्रम_लानती https://t.co/x5XHChwHtm https://t.co/GnHkh73byB	3 606 2022۔و23-0 علامحافظ 727 ص2 سغعں سی نیٹ جا یہ ہمارا ےکی ے اور جو مسلمان نھیں وہ پاکنتا نکاوزی اع عم نہیں رہ سنا شہہاز ریف فور ”فی درے 24	3 606 2022. And 23-0 Allamahafiz 727 p.2 Sagan Sea Net It belongs to us and those who are not Muslims He did not listen to Pakanta Nikawazi Aam Shahhaz ref four” per 24 overs	Hate
1563516028579377152	پی پی 102: بھائی اختر بلوچ اور بھائی امتیاز بلوچ نمبر دار کے ہمراہ چک نمبر 454 علی پور بلوچاں میں آمد فوت شدگان کی فاتحہ خوانی اور لواحقین سے اظہار تعزیت کی۔۔ ۔۔ https://t.co/egYZKs1Goz	PP 102: Bhai Akhtar Baloch and Bhai Imtiaz Baloch along with Numdar came to Chak No. 454 Alipur Balochan and read Fatiha of the deceased and expressed condolences to the families. . https://t.co/egYZKs1Goz	NIL	NIL	No_Hate
1558521558922149889	@shujahkhan20 @Rajpoot_PML_N @pinky_wali @mananashai222 ان رنڈیوں کے کو سوں میں کرنا ماں کے بے سورے لنڈ https://t.co/48DhMc6ieQ	@shujahkhan20 @Rajpoot_PML_N @pinky_wali @mananashai222 making these rascals suck mother's bare cock https://t.co/48DhMc6ieQ	NIL	NIL	Hate
1568125640976523264	یہ ھے افغانستان کے کپتان محمد نبی کا بیٹا حسن عیسی جو اکتوبرمیں "پاکستان جونیئر لیگ" کا حصہ ھو گا... https://t.co/zUoUCfkAvk	This is Hasan Isa, the son of Afghanistan's captain Muhammad Nabi, who was born in October "Pakistan Junior League" will be part of... https://t.co/zUoUCfkAvk	NIL	NIL	No_Hate
1614483921244389377	پاکستان مسلم لیگ کے تمام ورکرز سپورٹرز اور ووٹرز کو قائد میاں نواز شریف کی جانب سے الیکشن کی بھر پور تیاری کا حکم سوشل میڈیا پر مسلم لیگ نکا بیانیہ بھرپور انداز میں پھیلایاجائےگا مسلم لیگ ن پنجاب میں سنگل لارجسٹ پارٹی بن کرآئیندہ پنجاب میں حکومت بنائے گی-انشاللہ @MaryamNSharif https://t.co/sTbery7A2D	Quaid Mian Nawaz Sharif ordered all the workers, supporters and voters of Pakistan Muslim League to fully prepare for the election. The narrative of the Muslim League will be widely spread on social media Muslim League-N will become the single largest party in Punjab and form the government in Punjab in the future - Inshallah @MaryamNSharif https://t.co/sTbery7A2D	NIL	NIL	No_Hate
1578838044639010816	اگر اپنا ایمان پاک رکھنا ہے تو ان مادرچود ملاوں، حافظ اور علما سے خود کو قریب نہ رکھیں جن مادرچودوں کے جسم پر دس انسانوں کے لباس جتنا کپڑا پڑا رہتا ہے اور یہ مادرچود شراب، زنا اور حرام کے چلتے پھرتے نمونے ہیں اور یہ مادرچود وہ کچھہ کرتے ہیں جو ایک عام مسلمان سوچ کر گھبراتا ہے😡 https://t.co/wpDJaESH7r https://t.co/KkAxUGmIMP	If you want to keep your faith pure, then don't keep yourself close to these motherless Mullahs, Hafiz and scholars, whose bodies are covered with cloth as much as the clothes of ten people, and these motherless women are walking examples of alcoholism, fornication and haram. They do things that a normal Muslim would be afraid to think about😡 https://t.co/wpDJaESH7r https://t.co/KkAxUGmIMP	جب سے مریم کو گلے لگا رکھا ہے 0 ۲۲“	Ever since Maryam has been embraced 0 22"	Hate
1587679154379657216	#پاکستان_بچاؤ_مارچ ستر سالوں اس ملک قابض مافیائی نمائندو سن لو...!!! اب تمہاری جنگ ٹکر کے ان لوگوں سے ہے, جنکے ماتھے پر فتح کے شکن نمایاں ہیں #جعفریات @ghazanlayyah #حقیقی_آزادی_لانگ_مارچ @FaizanMalikPTI @Shamrozkhanly @fawadchaudhry @ImranKhanPTI @Cricketracker https://t.co/N1rnBJF7Ab	#Pakistan_Bachao_March Listen to the representative of the mafia occupying this country for seventy years...!!! Now your battle is with those people of Takkar, on whose foreheads the wrinkles of victory are visible #Jaafriyat @ghazanlayyah #Real_Freedom_Long_March @FaizanMalikPTI @Shamrozkhanly @fawadchaudhry @ImranKhanPTI @Cricketracker https://t.co/N1rnBJF7Ab	NIL	NIL	Hate
1567922450154881026	اگر کل نسیم شاہ نیوٹرل ہو جاتا اور کہتا میرا کام تو باولنگ کرنا ہے بیٹنگ نہیں میں بیٹنگ میں کیوں مداخلت کروں تو ہار جاتے مگر وہ ملک کی عزت کی خاطر نیوٹرل😜 ہونےکے بجائے ایسا لڑا کہ تاریخ رقم کردی✌️ https://t.co/2ZiZagtqDi	If Naseem Shah had become neutral yesterday and said my job is bowling not batting why should I interfere in batting then he would have lost. But instead of being neutral for the honor of the country, he fought in such a way that history was made ✌️ https://t.co/2ZiZagtqDi	کم "0۸٢۲ ‏-ھ*"‎	less "0822 -H*"	No_Hate
1596168013811703808	پیپلز پارٹی ایم این اے قادر مندوخیل کی سربراہی میں قومی اسمبلی کی قائمہ کمیٹی کے حکم کے نتیجے میں حکومت نے 350 میپکو ملازمین کی بحالی کا حکم جاری کردیا۔دس سال معاشی زیادتی کا نشانہ بنایا گیا جنہیں #پیپلزپارٹی نے بحال کردیا۔ ملازمین کے پیپلز پارٹی، بلاول بھٹو کے حق میں نعرے https://t.co/1yjGiHdou3	As a result of the order of the Standing Committee of the National Assembly under the leadership of People's Party MNA Qadir Mandukhel, the government issued an order for the rehabilitation of 350 Mapco employees. They were subjected to economic abuse for ten years and were restored by the #People's Party. Employees' slogans in favor of PPP, Bilawal Bhutto https://t.co/1yjGiHdou3	NIL	NIL	No_Hate
1566740554968449024	بی ایل ایف نے ضلع پنجگورکی وادی گچک میںIEDدھماکے میں2نہتے معصوم شہریوں کونشانہ بنایا۔زخمی شہری بچائےگئےآرمی ڈاکٹروں کے ذریعہ علاج کیاجارہاہےBLFنے بے شرمی کے ساتھ شہریوں کوفورس کےخلاف عدم تعاون کی وجہ سے نشانہ بنایاایسے وقت میں جب بلوچ عوام پہلے ہی سیلاب کی تباہ کاریوں سے متاثرہیں https://t.co/Gakl0zDSPJ	BLF targets 2 innocent civilians in IED blast in Gachak valley of Panjgur district. Injured civilians are being treated by rescued army doctors. https://t.co/Gakl0zDSPJ	۱ یح ٭ کک 1 1 ِ کک ترک ۰ کی ہ۔۔	1 Yah * Cook 1 1 Cook Turk 0 Who is	No_Hate
1581251809502367744	سلام لیاقت علی خان ❤️ “بابائے مُہاجِر قوم و بانی متروکہ سِندھ لیاقت علی خان کی قُربانیاں اور اس کا حاصل؟” https://t.co/pgWBfXr84i https://t.co/ZJFyr5WY60	Hello Liaquat Ali Khan ❤️ "Father of Muhajir nation and founder of abandoned Sindh Liaquat Ali Khan Sacrifices and its reward?” https://t.co/pgWBfXr84i https://t.co/ZJFyr5WY60	اہ ا پا گے را روم و بای مرک ندم لیا ف کی غان ےج 7+ تر الام ائز_ [90۲66 ہہ ط۸ ۰۷ا ‎۸٥٣١٥٥‏ حاجاتہا5 فنصم انا موس سس جس سے 200 ,ء9 : 0 5۸0٢ ٦ 110831 0810180 11821 2 5ب روز ہفنددات ۱۸ 11:50( پاکستان وقت کے مطااق)	Ah apage ra rom wa bai merck nadam liya f ki ghan Aj 7+ Tar Alam Iz_ [90266] 853155 Sis from which 200, 9 : 0 5802 6 110831 0810180 11821 2 5th day of Hafandadat 18 11:50 (Pakistan time)	No_Hate
1581531057085521921	یہ وہ دلے ہیں جو یوتھیوں کے لندن میں میاں نواز شریف کے گھر کے باہر احتجاج پر اخلاقیات جمہوریت کا درست دیتے ہیں میاں نواز شریف کے گھر کے باہر احتجاج کرنے والوں کو گھٹیا لکھتے ہیں لیکن جیالوں کے اعتزاز احسن کے گھر کا گھیراؤ کرنے پر بہترین کہتے ہیں اپرشیٹ کرتے ہیں. https://t.co/dt6As47RPl	These are the hearts that justify the morality of democracy on the protests of youths outside Mian Nawaz Sharif's house in London. They say they do appetizers. https://t.co/dt6As47RPl	‎٥5‏ 9۵۸01۷2 صحرانورد عمران خان کی مسلسل حمایت, پیپلز پارٹی پنجاب کا اعتزاز احسن کے گھر کا گھیراؤ کرنے کا اعلان ‏جر ا نت ول کا و ‏حبف ‏. ‏۷ ‏عمران خان کی مسلسل حمایت, پیپلز پارٹی پنجاب کا اعتزاز احسن کے گھر کا گھیراؤ کرنے کا اعلان ‎٤‏ وو ین 6 کڑ	55 9580172 Deserter Continuous support of Imran Khan, People's Party Punjab The announcement to surround the house of Aitzaz Ahsan Jara Natwil's W Habaf . 7 Continuous support of Imran Khan, People's Party Punjab The announcement to surround the house of Aitzaz Ahsan 4 Wu Yin 6 Kd	Hate
1563806417471037440	جو کہتے تھے کہ مولوی انسانیت میں تقسیم پیدا کرتے ہیں، آج میدانِ عمل میں اتر کر مولویں نے ان کے منہ پہ ایک زوردار چپیڑ ماری مولانا ربنواز حنفی صاحب پاکستان رائے حق پارٹی کے سربراہ https://t.co/cJ5QEyaMKx	who used to say that clerics create division in humanity, Today, after coming to the field of action, Maulwa slapped him hard on the face Maulana Rabnawaz Hanafi Sahib Pakistan Rai Haq Party Head https://t.co/cJ5QEyaMKx	NIL	NIL	No_Hate
1615905468450316289	داستانِ غم تم ایک لڑکی کا دکھ سمجھو گے؟ جو صبغتہ اللّٰہ کھو بیٹھی ہے حرام کی لذت میں سکون کیلیے جو اپنے آپ کو کھو بیٹھی ہے ایک ایسی لڑکی جو اچانک بہک گئی ہے سفید چمکتے دل کو کالا کر بیٹھی ہے جو چمکتے سراب کے پیچھے چلتے صحراٶں میں بسیرا کر بیٹھی ہے https://t.co/Pfw8JhmiRH	A tale of sorrow You will understand the pain of a girl? Who has lost the character of Allah For peace in the pleasure of the forbidden Who has lost herself A girl who is suddenly seduced The white shining heart is blackened Who followed the shining mirage She is sitting in the desert https://t.co/Pfw8JhmiRH	NIL	NIL	No_Hate
1568112838706610177	ٹھگوں کا کپتان۔ ٹھگ آف پاکستان۔ عمرانڈو خان۔ https://t.co/nzrUCHVg9p	Captain of thugs. Thugs of Pakistan. Imrandu Khan https://t.co/nzrUCHVg9p	NIL	NIL	Hate
1608057345086570498	¢ان دہشت گردوں کا سب سے خطرناک کھیل 2022 میں شروع ہوا جب انہوں نے خودکش حملے کرنا شروع کر دیے۔ #PakArmyNationsHope https://t.co/lqhd0reSeB	The most dangerous game of these terrorists started in 2022 when they started carrying out suicide attacks. #PakArmyNationsHope https://t.co/lqhd0reSeB	6 703۴۸۸۲۱۷۱۱۷۷۵۲۱ ‎٠‏ ۵ 7 نو ںآ پریشن پک فو نکی بمادری اور عزم کامن بوت شھوت ہے کیک م سکسی وہشنگرو مرو پکوفیال نیں ہونے دیں گے	6 7034882171177521 0 5 7 The new operation focused on motherhood and determination Common bot shoot hai kek m sexy whishngru Will not let die pikofial	No_Hate
1573233020684967936	یہ ہوتا ہے سچا احساس 👇🏻، سیکھو کچھ مریم صفدر اعوان 🖐🏻 @MaryamNSharif #روئیں_چیخیں_پیٹیں https://t.co/RIi3SqsW0a	This is true feeling 👇🏻, learn something Maryam Safdar Awan 🖐🏻 @MaryamNSharif #cry_scream_your_belly https://t.co/RIi3SqsW0a	NIL	NIL	No_Hate
1593501510595448832	@zartajgulwazir شاہ زیب خانزادہ پکا جہنمی ہے۔ اس نے ایک زخمی مریض کو ننگا کیا ہے۔ https://t.co/cnVKz9wGBo	@zartajgulwazir Shahzeb Khanzada is a hell of a person. He has uncovered an injured patient. https://t.co/cnVKz9wGBo	شاہزیب کے پروگرام کے بعد یوتیوں کی تازہ ترین صورتحال	After Shahzeb's programme, the latest of the Yuttis The situation	Hate
1563555121820184577	1چرسی نے دوستوں کی دعوت کا پروگرام بنایا اور اپنے ہی گھر سے رات کو بکرا چوری کیا اور خوب دعوت کی صبح گھر پہنچا تو بکرا گھر پر بندھا تھا بیوی سے پوچھنے لگا بکرا کہاں سے آیا؟ بیوی بکرے کو چھوڑو رات سے ہمارا🐕 غائب ہے دُنیا آج اس چرسی کو رانا ثناء کے نام سے جانتی ہے @PresPMLNPunjab https://t.co/CP7GAtBMAP	1 Chersi made a program to invite friends and stole a goat from his own house at night and gave a good feast When he reached home in the morning, the goat was tied at home. He asked his wife where the goat came from. The wife Leave the goat, our 🐕 is missing since night The world today knows this Charsi as Rana Sana @PresPMLNPunjab https://t.co/CP7GAtBMAP	NIL	NIL	Hate
1564895031504375808	@indyurdu آج سے تقریباً 3 دہایاں قبل 1989 کو سوویت یونین کی فوجیں 9 سال افغانستان پہ قابض رہنے کے بعد دریائے آمو کے پُل سے افغانستان سے شکست کھا کر بھاگنے کے مناظر ہیں۔ پُل کے دوسری طرف روسی عورتیں جوتوں کے ہار لیکر کھڑی تھیں https://t.co/abCM8iOf1E	@indyurdu About 3 decades ago today in 1989, there are scenes of the Soviet Union forces fleeing from Afghanistan after being defeated by the Amu River bridge after occupying Afghanistan for 9 years. On the other side of the bridge, Russian women were standing with shoelaces https://t.co/abCM8iOf1E	NIL	NIL	No_Hate
1598997973513347073	خواتین کو 14 سیکنڈ سے زائد گھورنا جرم قرار، ٹھرکی خضرات 13 سیکنڈ دیکھنے کے بعد 1 سیکنڈ کا وقفہ کرکے دوبارہ 13 سیکنڈ سے دیکھنا شروع کرے🔥، میں اپکو منع کرسکتا تھا لیکن اپ لوگوں نے ماننا نہیں، اسلئے صرف حل بتارہا ہوں 🤣😜🙈 @TabiCh_DxB @ShahzadGill202 https://t.co/pwuvixoeLQ	It is a crime to stare at women for more than 14 seconds, Tharki Khizrat should take a break of 1 second after watching 13 seconds and start watching again from 13 seconds. 🙈 @TabiCh_DxB @ShahzadGill202 https://t.co/pwuvixoeLQ	ام نو 4 سن سےزائرگھورن جر قرار	4 years ago	No_Hate
1568324784253206528	@QasimKhanSuri عمران خان نے انکی ماں چود کر بدلے میں قیمت بھی چوری کی گاڑی دے دی https://t.co/m19Ru7n9bs	@QasimKhanSuri Imran Khan raped his mother and gave her a stolen car in return https://t.co/m19Ru7n9bs	NIL	NIL	Hate
1593629337638633477	@ImranKhanPTI جسکو مودی، اسرائیل، امریکہ حتٰی کہ سارے اسلام اور پاکستان دشمن سب سے بڑی رکاوٹ سمجھے تو جان لو وہی ھماری آخری اُمید ہے اور اُن پر کیچڑ اچھالنے والے ہی اصل غدار ہیں چاہے وہ فضلو زرداری شریف ہوں یا کوئی اور۔۔ #صحافتی_گدھ #کہاتھا_بھاگنےنہیں_دینگے #امپورٹڈ_حکومت_نامنظور https://t.co/DCwzDYjo59	@ImranKhanPTI whom Modi, Israel, America and even the whole of Islam and Pakistan consider as the biggest obstacle. So know He is our last hope and those who throw mud on him are the real traitors whether they are Fazlu Zardari Sharif or anyone else. #Sahafti_Gadh #Kahatha_Bhaganehneh_Denge #imported_government_disapproved https://t.co/DCwzDYjo59	NIL	NIL	Hate
1593624905479643137	واللہ آپ سا تو کوئی بھی نئ❤️😓 #Urs_E_BabaJan شیخ الحدیث والتفسیر، امیر المجاھدین حضرت علامہ مولانا حافظ خادم حسین رضوی رحمہ اللّٰہ علیہ https://t.co/4VL7MzvEqr	By Allah, there is no one like you ❤️😓 #Urs_E_BabaJan Sheikh Hadith and Tafseer, Ameer Al-Mujahideen Hazrat Allama Maulana Hafiz Khadim Hussain Rizvi may Allah have mercy on him https://t.co/4VL7MzvEqr	NIL	NIL	No_Hate
1578766214436114433	سوائے ابلیس کے جہاں میں سبھی تو خوشیاں منا رہے ہیں 😅 حضور علیہ السلام کی پیدائش پر شیطان رویا تھا جبکہ اسکے چیلے میلاد مصطفی منانے پر پیٹتے ہیں 🥴😁 #آمدنبی_الملحمه_مرحبا #سرمایہ_زیست https://t.co/WjF3IrJ7IJ	Everyone is celebrating except Iblees Satan cried at the birth of Holy Prophet (peace be upon him). While his disciples beat him for celebrating Milad Mustafa 🥴😁 #امدنبي_الملحمه_مرحبا #capital_life https://t.co/WjF3IrJ7IJ	سوائے ابلیس کے جھاں میں سبعی توخوشیاں منارھے ھیں	Except Iblis in the house of Sabai You are celebrating	Hate
1558455665479131138	@GFarooqi گورنر سندھ کہ پاس اختیارات تھے سب کچھ ٹھیک 👌 سے اٹھانے کا مگر معزز جج کہ پاس نہیں ہے اور کون سے انٹیلی جنس نے رپورٹ دیا ہے کہ ARY کا NOC کینسل کیا گیا ہے یہ کسی حکومت ہے جو کسی کو خوش کرنے کے لیے سچ کا سامنا نہیں کرتی اور میڈم آپ کی ٹانگیں کس کسں نے اٹھائے پلیز عوام کو بتا دے https://t.co/4McuGNjTEi	@GFarooqi Governor of Sindh that he had powers to take everything right But the honorable judge does not have a pass And what intelligence reports that ARY's NOC has been canceled is a government that doesn't face the truth to please anyone. And madam, who lifted your legs please tell the public https://t.co/4McuGNjTEi	NIL	NIL	Hate
1574370560343437318	ہم دوستی بھی جانتے ہیں،،سیاست بھی ،،نفرت بھی بغض بھی حسد بھی کینہ بھی اور ہر لہجے میں ہم جواب دینا بھی جانتے ہیں مریم اورنگزیب کے ساتھ جو ہوا بہت زبردست ہوا،،👎👎 یہ ایک عورت کی گاڑی ہے یاسمین راشد کی غیر مسلم لیگ ن نے ان پر تشدد کیا تھا https://t.co/MY0tnor6J7	We also know friendship, politics, hatred, malice, envy, malice, and we also know how to respond in every tone. What happened to Maryam Aurangzeb was very great. This is a woman's car Yasmeen Rashid was tortured by non-Muslims https://t.co/MY0tnor6J7	NIL	NIL	Hate
1593096529308717057	مسلح افراد کا گاؤں پر حملہ ،12 افراد ہلاک https://t.co/wooRKPlztv https://t.co/erkrKT9vpA	Armed men attack village, 12 people killed https://t.co/wooRKPlztv https://t.co/erkrKT9vpA	NIL	NIL	No_Hate
1567442366931550209	@Khadija_Bibi69 عمران خان 75 سال سے قائم کئے گئے اس کرپٹ سسٹم کیلئے سب سے بڑا نہیں بلکہ واحد خطرہ ہے اسلئے سب اس کے خلاف متحد ہیں لیکن عوام کی طاقت اگر کھڑی رہی تو سب کو عبرت ناک شکست ہوگی۔ https://t.co/hmey4RoVf2	@Khadija_Bibi69 Imran Khan is not the biggest but the only threat to this corrupt system that has been established for 75 years, so everyone is united against him, but if the power of the people remains, then everyone will be defeated. https://t.co/hmey4RoVf2	NIL	NIL	Hate
1564262971940937729	@SanaBajwa11 شہباز گل نے تو ایک ادارے کے خلاف بات کی تھی شوکت ترین نے تو پورے پاکستان کو دیوالیہ کر دینے کی بات کی ہے یہ لوگ ذہنی مریض عمران کی خاطر پاکستان سے نفرت اور پاکستان کے دشمن بن گئے ہیں ان کو سخت سزا دی جائے پاکستان دشمنوں شوکت ترین سمیت سب کو گرفتار کیا جائے https://t.co/U1TNBeVAow	@SanaBajwa11 Shehbaz Gul spoke against an institution Shaukat Tareen has talked about bankrupting the whole of Pakistan, these people have become enemies of Pakistan and hate Pakistan for the sake of mentally ill Imran. /t.co/U1TNBeVAow	NIL	NIL	Hate
1559877455548227584	لیکن حبشی مردوں کی رفاقت کا لطف اور مزہ پاکستانی شادی شدہ پختہ عمر اور تندرست اور صحت مند عورتیں ہی اٹھا سکتی ہیں، کیونکہ شادی شدہ خواتین کی سیکس کی پیاس اور آگ عمر کے ساتھ ساتھ بڑھتی چلی جاتی ہے اور ایک خاص اسٹیج پر پہنچ کر انکی شرمگاہ کی آگ کئی گنا بڑھ جاتی ہے 4/4 https://t.co/NycjqH3ZJq	But the pleasure and enjoyment of the companionship of Abyssinian men can only be enjoyed by Pakistani married women of mature age and fit and healthy, because the sex thirst and fire of married women increases with age and reaches a certain stage. The fire of their private parts increases many times 4/4 https://t.co/NycjqH3ZJq	NIL	NIL	Hate
1560149854478913536	جس نظام مٻں حق بات کہنا اور اپنے حقوق کى بات کرنا غدارى ہو، جہا پہ تعلٻم ٻافتہ اور اٻماندار جٻلوں مٻں اور بے اٻمان اور لٹٻرے اقتدار مٻں ہو، اٻسے نظام کو نٻست و نابود کرنا نوجوانوں کا فرٻضہ بن جاتا ہے.#شہباز_گل_کو_رہا_کرو https://t.co/Ew1mJ1aEn8	The system against which it is treason to speak the truth and to speak about one's rights, against which there are educated and disrespectful tribes and dishonorable and corrupt authorities, it becomes the duty of the youth to destroy this system. //t.co/Ew1mJ1aEn8	شہباز گل کا جرم یہ ہے کہ وہ پاکستانی ہے! بھارتی جاسوس - پاکستانی شہری بھارتی پائلٹ	Shahbaz Gul's crime is that he is Pakistani! Indian spy - Pakistani citizen Indian pilot	Hate
1565378856151908355	ایک حبشی جس کی ناک موٹی، آنکھیں چھوٹی ، رنگت سیاہ، چلتا تو لنگڑاہٹ نمایاں نظر آتی تھی بولتا تو زبان میں لکنت ، غلام ابن غلام باغ کے جھاڑ جھنکار سے کھجوریں چننے میں مصروف تھا، یہ کھجوریں نرم نہ تھیں اور ذائقہ میں بھی باقی کھجوروں سے مختلف جبکہ رنگ گہرا اور دانہ بہت چھوٹا سا۔ https://t.co/9dXbw2Sf4w	An Abyssinian, who had a thick nose, small eyes, dark complexion, a noticeable limp when he walked and a slur when he spoke, Ghulam Ibn Ghulam was busy picking dates from the bushes of the garden, these dates were not soft and had no taste. Differs from dates in that the color is darker and the grain is much smaller. https://t.co/9dXbw2Sf4w	NIL	NIL	No_Hate
1566721665995866112	جناح صاحب کے بعد قوم نے رنگ نسل،عمر اور مالی حالت کی تفریق کے بغیر اسی لیول اور نوع کے لیڈر عمران خان کو قبول کیا ہے۔75 سالوں میں اس بانجھ قوم کے ہاں صرف چار لیڈر پیدا ہوئے۔دو بہترین درجے کے(جناح اور عمران)اور دو بہتر درجے کے (بھٹو،مجیب )ان تینوں مواقع پر ملا۔ملحد متحد تھے https://t.co/IwMLD9EwKF	After Jinnah Sahib, the nation has accepted Imran Khan of the same level and type of leader without discrimination of color, race, age and financial status. In 75 years, only four leaders were born in this barren nation. Two of the best level (Jinnah). and Imran) and two better ones (Bhutto, Mujib) met on all three occasions. The atheists were united https://t.co/IwMLD9EwKF	NIL	NIL	Hate
1563396830003470338	پاکستانیوں وقت ہے ابھی جلدی سے #زنا_سود_لواطت_پرستی اور یتیموں پہ ظلم سے توبہ کرو ورنہ آفات اترتی رہینگی #استغفرالله #HelpWithFGRF https://t.co/EijXmGvy7v	Pakistanis, it's time to hurry up #Zana_Sud_Lawat_Pasti And repent of cruelty to orphans Otherwise, disasters will continue # Astaghfirullah #HelpWithFGRF https://t.co/EijXmGvy7v	صوبہ بلوچستان سیلاب زدگان کے لئے ٰ۱ امدادی سامان	Balochistan Province For the flood victims 1. Support equipment	No_Hate
1573899112927309824	ملک کو تباہ و برباد کرنے والا چوکیدار ہی چوروں کا سرغنہ ہے۔ #رجیم_چینج_کی_تباہ_کاریاں https://t.co/Lc2wLyVFcG	The watchman who destroys the country is the leader of the thieves. #Regime_Change_Ki_Tabah_Kariyan https://t.co/Lc2wLyVFcG	NIL	NIL	Hate
1562023085540352001	@OfficialDGISPR سنا ہے کسی الو کے پٹھے نے IK پر دہشت گرد کی FIR کٹوانی ہے بھلا اس کے پیچھے کون ہو سکتا ہے وہی مقدس گائیں دوسرے لفظوں میں نیوٹرال! اگر ان کے بس میں ہو IK کے بغض میں یہ جو 80000 پاکستانی شہید ہوے اور فوجیوں کی شہادتیں ہوئیں ان سب کا ذمہ دار IK کو ٹھہرا دیں🤬 https://t.co/IV9j5TlEYU	@OfficialDGISPR I have heard that an owl muscle has cut the FIR of a terrorist on IK, but who can be behind it, the same sacred cows, in other words, neutral! If they can, make IK responsible for the 80,000 Pakistani martyrs and the martyrdom of soldiers in the malice of IK. https://t.co/IV9j5TlEYU	NIL	NIL	Hate
1565584532304175110	عورت چاہے جس عمر کی بھی ہو اس کا سینہ اسکی شخصیت کو نکھارتا ہے اور معاشرے میں اس کی تصویر کو نمایاں کرتا ہے. 🔥🖤 #بدکار https://t.co/P3OTlr8L14	No matter what age a woman is, her chest Improves his personality and society I highlight his picture. 🔥🖤 #Wicked https://t.co/P3OTlr8L14	NIL	NIL	No_Hate
1578347905072566272	لن ایک ایسا بہترین آلہ ہے جسے عورتیں اور لڑکیاں اور خاص کر آنٹیاں شوق سے پکڑتی ہیں لن کا ٹوپا ٹٹے چوپا ہر چیز بہترین محسوس ہوتی ہے مرد سے زیادہ عورت کو لوڑا پکڑنے سے لیکر چوسنے تک زیادہ مزا دیتا ہے۔ مرد کو عورت کی زبان کا لمس سب سے زیادہ نشہ دیتا ہے۔ #شھوت_زادہ https://t.co/tItqYt7RUF	Lin is a great tool that is loved by women and girls and especially aunties. Lin's topa tete chopa feels great and gives more pleasure to a woman than a man, from holding the ball to sucking. A man is most intoxicated by the touch of a woman's tongue. #شهوت_زاده https://t.co/tItqYt7RUF	NIL	NIL	Hate
1578786334382387201	#عالمی_میلاد_کانفرنس @PATofficiaSM @PAT_officialNP فلک کے ستارو زمین کی بہارو خوشیاں مناؤ حضور آگئے ہیں مرکزی سوشل میڈیا ہیڈ پاکستان عوامی تحریک محترم آصف گجر صاحب کا سوشل میڈیا کیمپ کا وزٹ @ChAsifGujjarpat @PAT_officialNP https://t.co/d6DDKVCXa1	#World_Milad_Conference @PATofficiaSM @PAT_officialNP The stars of the sky are the springs of the earth They have come to celebrate Central Social Media Head Pakistan Awami Tehreek Hon'ble Asif Gujjar visit to social media camp @ChAsifGujjarpat @PAT_officialNP https://t.co/d6DDKVCXa1	NIL	NIL	No_Hate
1617291933554200576	امپورٹڈ حکومت اور نیوٹرلز کو چاہیے کہ 19ویں ترمیم کا بل پیش کرکے اس آئین پاکستان کو تبدیل کرکے توہین پاکستان رکھ دیا جائے۔ آپ کا ہر عمل مکمل تباہیئے پاکستان کی نمائندگی کرتا ہے۔ #محسن_نقوی_نامنظور https://t.co/iR71wPt1Wr	Imported government and neutrals should introduce the 19th amendment bill and change this constitution of Pakistan to insult Pakistan. Your every action represents complete destruction of Pakistan. #Mohsen_Naqvi_Namanzoor https://t.co/iR71wPt1Wr	پیڈیی امم کے نا مزہگران وز یراع کی دجشہرت لا انرک گا ری اش کا جھمکردار لا رن ےزاکداخانوں کےانار ۷ سٗسے نیو زینل چلانا لآ خ مت مم نمی لا فیک نوز کے ذر یع بلیک میلن ک کا دعندہ لا یپ ٹاپ/ریش یڑل لا عارث یل زی فر ا وکییس میں م رکز یکرداد لا آخادہانگک یڑل لا زرداربی کے کا نے وہندوںکافرنٹ ٹن ۱ لا ینزو ںکنالی ہے نا می دی اونشکی ز من	The popularity of the pedi umma's disaffected viziers Jhumkardar of La Enrique Ga reash La Run Ezaka Khanon Ka Anar 7 Sase New Zainal Posted by Blake Mellon via Fake Nose Centralized focus in a laptop/restrial virtual reality case La Akhadhangak Yeral La Zardari ke kane vhindonka front ton 1 la yanzo kanali hai na mi di onishki zmin	Hate
1608498599523934210	ٹھکرا دو اگر دے کوئی ذلت سے سمندر عزت سے جو ملے وہ قطرہ بھی بہت ھے	Reject if someone gives you shame The drop of respect that is received is too much	0+7 ۱۱۷۰ 3۰۱۰٤7 2 07 ار روے کوئی کے 77-7 عمزت سے جو لے وہ قطرہ بھی بہت سے	0+7 1170 301047 2 07 Ar Rowe Koi K 77-7 The drop that you take from Amzat is also many	No_Hate
1568118962432393219	سکاٹ لینڈ میں ہونے والے ریفرنڈم کا حوالہ دیتے ہوئے گرپت ونت سنگھ پنوں نے کہا کہ خالصتان موومنٹ کا مقصد پنجاب کو بھارت کے قبضے سے آزاد کرانا اور لوگوں خصوصاً سکھ برادری کو ان کا حق دلانا ہے #sikhsforjustice #khalistan https://t.co/Uja3vv5DqL https://t.co/GSoRS3wxLo	Referring to the referendum held in Scotland, Gurpatwant Singh Pannu said that the aim of the Khalistan Movement is to free Punjab from Indian occupation and to give people, especially the Sikh community, their right. #sikhsforjustice #khalistan https://t.co/Uja3vv5DqL https://t.co/GSoRS3wxLo	NIL	NIL	No_Hate
1568106533384339456	یہ جو عورتیں جھوٹی محبت کا دعویٰ کر کے ماؤں کے شہزادے اور بہنوں کے بھائی کھا جاتی ہیں کاش کوئی اُنکو بھی کسی چوک میں لٹکا کے انکے چیتھڑے اُڑا دے ۔۔۔🥀🖤 https://t.co/TMfPujBsZY	These women who claim false love and eat their mothers' princes and sisters' brothers, I wish someone would hang them in a square and blow their rags 🥀🖤 https://t.co/TMfPujBsZY	NIL	NIL	Hate
1567886698272399361	PTI❤💚 کی جیپ پر اب گن لگادی گی مقابلہ#امپورٹڈ_حکومت_نامنظور https://t.co/6dMao9VaRv	PTI❤💚 She will now put a gun on her jeep.	NIL	NIL	Hate
1566420763804041217	فرانس کی امداد منہ پھیر کر لیں گناہ کم ملے گا جس نے سیدھے منہ سے لی وہ پکا جہنمی ہے، دجال کا دوسرا روپ سعد فتنا چابی والہ باندر🐖 #TLP_کنجروں_کا_ٹولہ #FloodReliefFund2022 https://t.co/2jKL5k7aJ0	Turn away the aid of France, the sin will be less, whoever took it straight from the mouth is a hell-bound person, another form of Dajjal, Saad, Fitna, the monkey with the key 🐖 #TLP_gang_of_kangaroos #FloodReliefFund2022 https://t.co/2jKL5k7aJ0	NIL	NIL	Hate
1613565691948597249	کراچی والوں 15 جنوری کو ووٹ ڈالو اس باری نو چوری نو ڈاکا۔۔۔ #KARACHI_TLP_KA https://t.co/VAnGDRSAzR	People of Karachi, vote on January 15, this time, no theft, no robbery. #KARACHI_TLP_KA https://t.co/VAnGDRSAzR	۴ پچ فراخیوالوں 0	4 pitch Volunteers 0	No_Hate
1580848685612929030	@MaryamNawazStan شکر ہے کہ پٹھان ہے اگر پنجابی ہوتا تو کب سے میدان چھوڑ کر بھاگ جاتا۔ https://t.co/PY1SVh2EcZ	@MaryamNawazStan thankfully he is a pathan if he was a punjabi then he would have left the field and ran away. https://t.co/PY1SVh2EcZ	NIL	NIL	Hate
1564343386705993728	پٹواریو اپنے چوتڑ پیٹو عمران خان فارن فڈنگ کیس میں رنگے ھاتوں پکڑا گیا۔ دیکھو ظالم کو کروڑو کا فنڈ لوگ بھیج رہیں ہیں پٹواریو تمھارا منہ بندر کے پچھواڑے جیسا ھو گیا ھے https://t.co/CF88KBxDN2	Patwari was caught red-handed in the Imran Khan foreign feeding case. Look, people are sending crores of funds to the tyrant Pitwario your mouth is like a monkey's butt https://t.co/CF88KBxDN2	NIL	NIL	Hate
1580116771188592640	@abdullaamiraly1 @SHABAZGIL اور یوتھیئے گانڈو، حرامزادے، بہنوں کو نچوانے والے، بیوی اور ماں کے بھڑوے ہوتے ہیں ۔۔۔۔ یقین نہ آئے تو اپنے جیسے ان بیغیرت یوتیوں سے رابطہ کریں ۔ شکریہ https://t.co/4oTKYTGtZF	@abdullaamiraly1 @SHABAZGIL and Yuthiye Gando are bastards, squeezers of sisters, wife and mother's brats. If you don't believe, contact these unscrupulous people like you. Thanks https://t.co/4oTKYTGtZF	NIL	NIL	Hate
1580157231034945537	حقیقی آزادی کی اس جنگ میں پوری قوم اپنے لیڈر کے ساتھ ڈٹ کر کھڑی ہے #کپتان_عوام_کی_جان https://t.co/dOGxv70I50	In this war of true freedom, the whole nation is standing with its leader #Kaptan_Awam_Ki_Jaan https://t.co/dOGxv70I50	NIL	NIL	No_Hate
1604878445472874496	پنجاب کا سب سے بڑا ڈاکو پنجاب کا سب سے بڑا ڈاکا مارنے کے لئے تیار دکھائی دیتا ہے #BaniGalaHouseOfThieves https://t.co/fG92yRkAwq	The biggest dacoit of Punjab The biggest robbery of Punjab Looks ready #BaniGalaHouseOfThieves https://t.co/fG92yRkAwq	NIL	NIL	Hate
1568532177226276869	انہوں نے دعویٰ کیا کہ پاکستان پیپلز پارٹی (پی پی پی) اور پاکستان مسلم لیگ (ن) کے مقامی رہنما پاکستان تحریک انصاف کی حکومت کو گرانے پانچ سالہ مدت کی تکمیل سے قبل ہی اسمبلی تحلیل کرنے کی سازش کا حصہ تھے۔ https://t.co/3lFB1XqA1F https://t.co/ViqB7tElaq	He claimed that local leaders of the Pakistan People's Party (PPP) and the Pakistan Muslim League (N) were part of a conspiracy to topple the Pakistan Tehreek-e-Insaf government before the completion of its five-year term. https://t.co/3lFB1XqA1F https://t.co/ViqB7tElaq	اہم ترین وزیر کا دعویٰ	The claim of the most important minister	No_Hate
1573664150173224973	چور چوری سے جاتا ہے لیکن ہیرا پھیری سے نہیں مریم نواز نے ایک بار پھر سے چند اہم سرکاری عہدے داروں کو تحفے تحائف بھیج کر کیا پیغام دینے کی کوشش کی ہے #TransRightsAreHumanRights #DGISPR #ImranKhan #maryamnawaz #امپورٹڈ_حکومت_نامنظور https://t.co/9umbhtjs6Q	A thief goes by theft but not by manipulation. Maryam Nawaz has once again tried to convey a message by sending gifts to some important government officials. #TransRightsAreHumanRights #DGISPR #ImranKhan #maryamnawaz #imported_government_disapproved https://t.co/9umbhtjs6Q	NIL	NIL	Hate
1573778220259966977	@sattari_11 @iqrarulhassan اس کُتے کے بچے وڈھے “مجاھد” کی صرف شکل ملاحظہ فرمائیں، کسی آوارہ طوائف کا لبیکی بچہ https://t.co/MR051pqeOO	@sattari_11 @iqrarulhassan Just look at the look of this puppy "Mujahid", the son of a stray prostitute https://t.co/MR051pqeOO	NIL	NIL	Hate
1614950543868428289	پی ٹی آئی کے 10سال کے دور میں پختونخواہ کو تباہ و برباد کر دیا گیا ہے۔ اکونمی کے علاوہ سیکیورٹی کا بھی جنازہ نکل گیا ہے۔لطیف آفریدی کا قتل انتہائی افسوسناک ہے۔ آئے دن کوئی سیکیورٹی کا مسئلہ ہو رہا ہے۔ جب ساری کیبنٹ لاہور میں بیٹھی ہو گی تو صوبہ کون چلائے گا؟ https://t.co/z6DPM0tG4W	Pakhtunkhwa has been destroyed during the 10-year tenure of PTI. Apart from the economy, the security has also gone out. The killing of Latif Afridi is very sad. Every day there is a security problem. When the entire cabinet is sitting in Lahore, who will run the province? https://t.co/z6DPM0tG4W	NIL	NIL	Hate
1558888346318999558	عشق حسین ع کی ایک شمع جلا لو دل میں بعد مرنے کے لحد میں بھی اجالا ہوگا ❤ https://t.co/dtIRciKron	Light a candle of Ishq Hussain's love in your heart and it will shine even after death ❤ https://t.co/dtIRciKron	NIL	NIL	No_Hate
1614856355285712896	افواج پاکستان نے کھبی اپنی عوام سے ہمدردی اور ایثار کا ناتا ناطہ نہیں توڑا جب بھی کبھی اپنے ملک کو اپنے عوام کو مصیبت میں پایا ہر لمحہ اپنے عوام کے ساتھ رہے اور کسی بھی قربانی دینے سے دریغ نہیں کیا #پاکستان_ہماری_ریڈلاہن #PakistanZindabad #PakArmyZindabad https://t.co/gGhUiRbEbH	Pakistan Army has never broken the bond of compassion and sacrifice with its people, whenever it found its country in trouble, it stood by its people every moment and did not hesitate to make any sacrifice. #Pakistan_our_red_lahan #PakistanZindabad #PakArmyZindabad https://t.co/gGhUiRbEbH	NIL	NIL	No_Hate
1561747074902659072	قرآن پاک میں جتنی بھی قوموں کی تباہی کا زکر ملتا ہے کسی قوم کو نماز زکوۃ یاحج نا کرنے پر تباہ نہیں کیا ، بلکہ کم تولنے ،رشوت ستانی، عدل وانصاف نا کرنا ،ناجائز حق کھانا اورغریب اور کمزور لوگوں پر ظلم کرنے کی وجہ سے عذاب دیا گیا #بےحس_حکمران_ڈوبتی_عوام https://t.co/VW5FNijcUz	As many nations are mentioned in the Holy Qur'an, no nation was destroyed for not offering Zakat or Hajj. Rather, they were punished for weighing less, accepting bribes, not doing justice and fairness, taking illegitimate rights and oppressing the poor and weak. #भेश्स_हकमरान_दूबती_वामाई https://t.co/VW5FNijcUz	1چ ۔جرجائیں گے ,مھ ری حمایت تی ے 77 پ26 ۸۲۱۲5۲ 8۵۸۷۸۸۰۲۷ ۲۸۴۱2 5۸۸0 ۲۱۷۸۶۸۱۱۱ 1	1 Ch , I support you 77 P26 821252 858788027 28412 5880 217868111 1	No_Hate
1574385047876026368	یہ بھوسڑی کا پروفیسر کے روپ میں اصل میں ایک یوتھیا ہے م چ @zaidia https://t.co/Uy55GEVSKI	This Bhosari is actually a Yuthiya in the guise of a professor M. Ch @zaidia https://t.co/Uy55GEVSKI	NIL	NIL	Hate
1563991263090728962	شکریہ خواجہ صاحب پچھلے دور میں نئی کوچز کا منصوبہ فائنل کیا مگر عمران حکومت نے 3 سال اس میں تاخیر کی، ہم نے دوبارہ آتے ہنگامی بنیادوں پر اس پر کام شروع کیا۔ انشاءاللہ بہت جلد پہنچ رہی ہیں ڈوثرن صدر سبی منیر بگٹی https://t.co/3KTMn38B5X	Thank you Mr. Khawaja, the project of new coaches was finalized in the previous period, but the Imran government delayed it for 3 years, we started working on it again on an emergency basis. Inshallah Dothran President Sabi Munir Bugti is arriving very soon https://t.co/3KTMn38B5X	NIL	NIL	No_Hate
1558396844262281216	@MarianaBaabar @OfficialDGISPR @NawazSharifMNS یہ غدار جرنیل ایسے تھوڑی بھونکے گا اسکے مالک جب تک نہیں کہتے بات کرنے کو https://t.co/coUHvnqaL2	@MarianaBaabar @OfficialDGISPR @NawazSharifMNS This traitor general will bark like this until his master tells him to talk https://t.co/coUHvnqaL2	٦ٹ‎ ٦ م تفر فدار پاکتان ۱ ي	6t 6 M. Tafar Fidar Pakatan 1 Y	Hate
1587464967053365249	صرف تصور کریں' اگر درمیان میں ایک آنھ ہو تو کوں سا شیطان 😈 بنتا ہے *"کمینٹ کریں"* #چابی_والےکھلونے https://t.co/6qbju0IeBT	just imagine' If there is an eye in the middle, which one? Satan becomes 😈 *"Comment"* #चाबी_वालेखलेखोने https://t.co/6qbju0IeBT	NIL	NIL	Hate
1565734490210766849	کس نے ملک سے غداری کی ؟ جس کے نتیجے میں بھارتی دہشت گرد کلبھوشن کا کیس عالمی عدالت میں پہنچا، کوٸی اور نہی لندن والا بھگوڑا جو دواٸی لینے گیا تھا @TeamiPians #پاکستان_دشمن_پی_ڈی_ایم https://t.co/G0Zz46Z17z	Who betrayed the country? As a result of which the case of Indian terrorist Kulbhushan reached the International Court of Justice, none other than the fugitive from London who went to get medicine. @TeamiPians #Pakistan_Enemy_PDM https://t.co/G0Zz46Z17z	NIL	NIL	Hate
1567398377037627393	اسلام آباد تھانہ کرپا کی حدود میں درینہ دشمنی پر ایک شخص قتل جاوید نامی شخص نماز فجر کے بعد گھر کی چھت پر چہل قدمی کررہا تھاچہل قدمی کے دوران نامعلوم افراد نے فائرنگ کرکے قتل کردیا۔ @ICT_Police @BlueTV22415729 @HMSABKAISLAMBAD https://t.co/F1UygIeJuH	A person was killed due to enmity with Darina in the limits of Karpa police station, Islamabad. A person named Javed was walking on the roof of the house after Fajr prayer. While walking, unknown persons shot and killed him. @ICT_Police @BlueTV22415729 @HMSABKAISLAMBAD https://t.co/F1UygIeJuH	NIL	NIL	No_Hate
1595805454739075074	ھم عاصم منیر صاحب کو چیف کمانڈر تعینات ہونے پر دِل کی گہرائیوں سے مبارکباد پیش کرتے ہیں، اور اُمید کرتے ہیں حق سچ کی آواز بلند ہو گی۔ کرپٹ لوگوں کا احتساب ھو گا، عوام اور فوج میں محبت دوبارہ پھلے پھولے گی۔ انشاء اللہ https://t.co/F7Z9C4sS31	We heartily congratulate Asim Munir Sahib on being appointed as the Chief Commander, and hope that the voice of Haq Sach will be raised. Corrupt people will be held accountable, love will flourish again among the people and the army. God willing https://t.co/F7Z9C4sS31	NIL	NIL	No_Hate
1606907276534874115	#یوم قائد اعظم@ 25 دسمبر یوم پیدائش بانی پاکستان قائد اعظم محمد علی جناح رحمتہ اللہ علیہ ۔اللہ پاک بانی پاکستان کی قبر پر کروڑوں رحمتیں نازل فرمائے اور درجات میں بلندیاں عطاء فرمائے آمین ثم آمین یارب العالمین https://t.co/YfwBDFybYY	#Quaid-e-Azam Day@ December 25, the birth anniversary of the founder of Pakistan, Quaid-e-Azam Muhammad Ali Jinnah, may Allah shower millions of blessings on the grave of the founder of Pakistan and grant him elevation in ranks.	|6 ۸7۸۸۸10۸۷-]5- ۸0٢ا‏ نو | ععطتثہ0 285 مم	|6 878881087-]5- 802a nine | 0 285 mm	No_Hate
1593632664547885061	@SanaBajwa11 توشہ خانہ سے 2016 میں قطری شہزادے کی طرف سے مریم نواز کو دیئے گئے انمول تحائف بھی غائب ہیں جن کو 2017 میں چوری کیا گیا پٹواریو........ حساب دو حساب 🤣 🤣 🤣 🤣 🤣 #الیکشن_کمیشن_نامنظور #امپورٹڈ_حکومت_نامنظور https://t.co/wli4Qk0nUV	@SanaBajwa11 Priceless gifts given to Maryam Nawaz by the Qatari Prince in 2016 are also missing from Tosha Khana. Which were stolen in 2017 Patwario........ Account Two Accounts 🤣 🤣 🤣 🤣 🤣 #Election_Commission_Disapproved #imported_government_disapproved https://t.co/wli4Qk0nUV	NIL	NIL	Hate
1606512275975999488	وزیراعظم شہباشریف نے کہاہے کہ دہشتگردوں کے مذموم مقاصد پاکستان کی قوم کے حوصلے پست نہیں کرسکتے @CMShehbaz @PakPMO @MoIB_Official @ICT_Police https://t.co/AMyjqifdxv https://t.co/YInZHepabR	Prime Minister Shahbaz Sharif has said that the nefarious intentions of terrorists cannot demoralize the nation of Pakistan @CMShehbaz @PakPMO @MoIB_Official @ICT_Police https://t.co/AMyjqifdxv https://t.co/YInZHepabR	NIL	NIL	No_Hate
1617821113446453248	1/1 خبردار رہنا!اس جرم کی سزا دینا میں ملے گی کچھ چیزے ایسی ہوتی ہیں جو ادھار ہوتی ہیں کچھ ایسی ہوتی ہیں جو نقد ہوتی ہے ان میں ادھار نہیں ہوتا۔ وہ کہتے ہیں نہ ہم جی ادھار کا کاروبار نہیں کرتے ہم کیش میں کام کرتے ہیں اک ہاتھ دے دوسرے ہاتھ لے ہمارا یہ سلسلہ ہے ہم بلکل https://t.co/ADVz95tMqm	1/1 Be careful! This crime will be punished There are some things that are borrowed and some that are cash, they are not borrowed. They say no, we do not do loan business, we work in cash.	NIL	NIL	No_Hate
1617805991466389510	ان بھڑوں چوروں کونقل کرنے کا بہت شوق ہے تو اٹھائیں آوازاس اسرائیل امریکہ بھارت کےخلاف کریں ان سب کوننگاپوری دنیاکےسامنے اورنقل کریں ان ترقی یافتہ ممالک کی جواپنے ملکوں کوکیسے ترقی کی راہ پرگامزن رکھے ہوئے ہیں اوررتی بھرکرپشن نہ کرتے اورنہ کرنےدیتےہیں لعنت ایسے چورغدارلیڈروں پر https://t.co/uDW2nI23Po	They are very fond of imitating these big thieves, so raise your voice, expose them all in front of the whole world and imitate these developed countries who are keeping their countries on the path of development and do not commit corruption and do not allow it to be done. Curse such thieves leaders https: //t.co/uDW2nI23Po	NIL	NIL	Hate
1608337003191623681	پٹواریوں تیار ہو جاؤ اکیلا ڈائری لیکر نکلنے والا شخص اب ڈنڈا بھی ساتھ لیکر أئے گا انشاءاللہ https://t.co/MJFzctNW7v	Patwaris, get ready, a person who goes out alone with a diary will now come with a stick too Inshallah https://t.co/MJFzctNW7v	0٤۶ ‏ا‎ ۸۸٦۱۷۰٠۶“ 1٥٢۸١ ))۸	046 A 88617006 15281))8	Hate
1581307257010413569	@AmmarBu51715553 @Real_SHR9263 سالا یہ دکھ کاہے ختم نہیں ہوتا ہے 🤣🤣🤣🤣🤣🤣🤣🤣 بیچارہ (چ)یوتھیا https://t.co/zc8k5wUH79	@AmmarBu51715553 @Real_SHR9263 this year never ends. 🤣🤣🤣🤣🤣🤣🤣🤣 Poor (ch)yuthia https://t.co/zc8k5wUH79	یوتھیوں کے موجودہ حا لات	Present of the Uthians The situation	Hate
1578749866599419904	بلوچ کارکن راشد 4 سال سے ٹارچر سیل میں ہے ہماری جدوجہد اس وقت تک جاری رہے گی جب تک اس کی دیگر بلوچ لاپتہ افراد کے ساتھ محفوظ رہائی نہیں ہو جاتی ہم انسانی حقوق کی تنظیموں سے مطالبہ کرتے ہیں کہ راشد حسین کی حفاظت کے لیے اپنا کردار ادا کریں۔ #SaveRashidHussain #endenforceddisappea https://t.co/gEhuyQT1CM	Baloch activist Rashid has been in torture cell for 4 years and our struggle will continue till his safe release along with other Baloch missing persons. We call on human rights organizations to play their role in protecting Rashid Hussain. #SaveRashidHussain #endenforceddisappea https://t.co/gEhuyQT1CM	NIL	NIL	Hate
1559848590016536576	@OfficialDGISPR اللہ عزتوں کو جلا بخشے آمین https://t.co/TcCJE4iRVB	@OfficialDGISPR May Allah burn the honors Amen https://t.co/TcCJE4iRVB	NIL	NIL	No_Hate
1580267321813524480	@ChotiSheikhni میاں صاب ان پڑھ جاھل گنوار بےعقلے اور جنگلی ہیں 👇 https://t.co/LwuAwc3YkZ	@ChotiSheikhni Mian Saab is uneducated ignorant gunwar senseless and wild 👇 https://t.co/LwuAwc3YkZ	NIL	NIL	Hate
1564207862297100288	💔زندہ جسم میں مردہ دل لے کر گھومنا بھی بہت بڑا عذاب ہے😔 #اردو_زبان 🥀 https://t.co/jBcf6hsvcw	With a dead heart in a living body Wandering is also a great punishment #Urdu_Language 🥀 https://t.co/jBcf6hsvcw	NIL	NIL	No_Hate
1564243257168650248	#عمران_خان_ٹیلی_تھون_مہم۔ اج نانی چورنی نے لفافوں پر پیسے برباد کیے یہی سیلاب زدگان کو دیتی تو شاید کچھ گناہ دھل جاتے ضائع کر رہی ہے فیک آڈیو ویڈیو پر چورنی 420 https://t.co/X3UgGaHohC	#Imran_Khan_Telethon_Campaign. Aj Nani Chorni wasted money on envelopes, if she would have given it to the flood victims, maybe she is wasting some sins. Fake audio video on Chorni 420 https://t.co/X3UgGaHohC	NIL	NIL	Hate
1558014948596490241	@Haroon_Natamaam بار بار پوچھا جاتا ہے کہ حنا پرویز کے بیٹے کی شکل تم سے کیوں ملتی ہے؟ شہباز گِل کا جج کے رو برو بیان 😎 https://t.co/2fCWvWcGBI	@Haroon_Natamaam is repeatedly asked why Hina Parvez's son looks like you? Shahbaz Gill's statement in front of the judge 😎 https://t.co/2fCWvWcGBI	NIL	NIL	Hate
1563868635504201729	اللہ نہ کرے یہ دن برگر کلاس پر آئے۔ ایک دن بھی زندھ نہیں رہ پائیں گے۔ خدا نے ان غریبوں کو سخت جان بنایا ہے جو ہر مصیبت سے لڑنے کی ہمت رکھتے ہیں۔ لیکن اب حالات ایسے ہیں کہ اگر فوری امدادی کارروایاں اور طبی ٹیمیں روانہ نہیں کئ گئیں تو بچوں اور خواتین اموات ہو سکتی ہیں۔ #Sindhflood https://t.co/if8LJkcDLF	God forbid this day come to burger class. They will not be able to survive even a day. God has made those poor people hardy who have the courage to fight against every adversity. But now the situation is such that if immediate relief operations and medical teams are not dispatched, children and women may die. #Sindhflood https://t.co/if8LJkcDLF	NIL	NIL	No_Hate
1565588180811890688	@MaleehaHashmey @Saif16Rahil پیارے لوگ اپنا چہرا نہیں دیکھاتے۔۔۔۔ https://t.co/oNcnUIhREJ	@MaleehaHashmey @Saif16Rahil dear people don't see their face. https://t.co/oNcnUIhREJ	NIL	NIL	No_Hate
1573943190016647171	#سپریم_لیڈر_عمران_خان بغلول نے ایک کتا پالا مودی کے اشارے پر نام ھے سعد مگر ھے پکا حرامی وہ سمجھتا ھے کہ پی ٹی آئی کا توڑ ھے https://t.co/ZdJh1kQvha	#Supreme_Leader_Imran_Khan Baghlul raised a dog on the instructions of Modi, its name is Saad, but it is a pakka harami He thinks PTI is broken https://t.co/ZdJh1kQvha	NIL	NIL	Hate
1614199161674506241	عامرلیاقت نازیبا ویڈیو کیس؛ دانیہ شاہ کی درخواست ضمانت پر فیصلہ محفوظ https://t.co/usRuNZlLXM https://t.co/FRjm8hOyjN	Aamir Liaquat Naziba Video Case; Decision reserved on Daniya Shah's bail plea https://t.co/usRuNZlLXM https://t.co/FRjm8hOyjN	NIL	NIL	No_Hate
1586429974466084864	تاریخ گواہ رہے گی کہ ایک انتہائی بے غیرت شخص نے اپنی قوم کی نسل کشی کرنے والوں کو خراج تحسین پیش کیا تھا۔ #ShameOnYou https://t.co/YfP8fyvodD	History will bear witness that a most disrespectful person paid tribute to the genocidals of his nation. #ShameOnYou https://t.co/YfP8fyvodD	کہ 58 ۸280 ۷ااد03٥‏ 176۰9 ا دہشتگردوں کے خاتمے سی ٹی ڈی کی کارکردگی قابل تعریف	That 58 8280 7 Aad 035 17609 a CTD's performance against terrorists is commendable	Hate
1577427046644346881	ہندہ کے چہرے کا کرب و تناؤ بتا رہا ہے کہ اب کی بار صرف پاؤں دم پر ہی نہیں رکھا بلکہ دم ہی کچل کر الگ کردی ہے عمران نے ۔ بقول اس جاہل عورت کے آئندہ تلنگے وزیراعظم آفس میں نہ بٹھائے جائیں ۔ Ok اب آوارہ لفنگیوں کو بھی ٹرائی کیا جائے ۔ مگر خیال رہے ملک چلانا ہے، کوٹھا نہیں ! 🤣😜 https://t.co/7X8tzeaogF	The tension on Hinda's face is telling that this time Imran has not only put his foot on the tail but has crushed the tail and separated it. According to this ignorant woman, Telangi should not be placed in the prime minister's office in the future. Okay Now the strays should also be tried. But remember to run the country, not the house! 🤣😜 https://t.co/7X8tzeaogF	ہے !ا ہہ کل ا	is Huh yesterday	Hate
1617838868094676993	یوسی 157 گنج بازار میں ایکسل اسکول کی برانچ کی افتتاحی تقریب کے موقع ایم این اے علی پرویز ملک ایم پی اے خواجہ عمران نذیر پولیٹکل سیکرٹری مریم نواز ذیشان ملک توصیف شاہ سابق لارڈ میئر لاہور مبشر جاوید سعدیہ تیمور نفیس آمین وحید خان کی شرکت @Kh_ImranNazir @AliPervaiz450 https://t.co/DFQ6hKqudy	MNA Ali Pervez Malik MPA Khawaja Imran Nazir Political Secretary Maryam Nawaz Zeeshan Malik Taseef Shah Ex-Lord Mayor Lahore Mubasher Javed Sadia Taimur Nafees Amin Waheed Khan participated in the opening ceremony of Excel School branch at UC 157 Ganj Bazar. @Kh_ImranNazir @AliPervaiz450 https://t.co/DFQ6hKqudy	NIL	NIL	No_Hate
1614974597430136833	سپر وائیزر محمد وقاص کا پرانی سبزی منڈی ڈیرہ اسماعیل خان میں مقرر کردہ سرکاری آٹا ڈیلر احسان اللہ کی دکان پر چھاپہ۔ سرکاری 20 کلو کے 20 گٹو گودام میں زائد منافع حاصل کرنے کے لئے چھپائے ہوئے تھے۔ سرکاری تھیلوں کو قبضہ میں لے لیا گیا. 3/3 @foodkpgovt @PMRUKP https://t.co/w1TiKgbENr	Supervizier Muhammad Waqas raided the shop of appointed government flour dealer Ehsanullah in old vegetable market, Dera Ismail Khan. 20 guts of 20 kg were hidden in the government godown to earn extra profit. Official bags were seized. 3/3 @foodkpgovt @PMRUKP https://t.co/w1TiKgbENr	NIL	NIL	No_Hate
1572881275248996352	آل انڈیا علما ومشائخ بورڈ کے قومی صدر، ورلڈ صوفی فورم و غوث العالم میموریل ایجوکیشنل سوسائٹی کے چیئرمین حضرت سید محمد اشرف کچھوچھوی نے سر ہند شریف پنجاب میں امام ربانی محبوب سبحانی غوث صمدانی مجدد الف ثانی شیخ احمد فاروقی سر ہندی حنفی رحمۃ اللہ علیہ کے مزار شریف پر حاضری پیش کی https://t.co/30uEU7wehj	Hazrat Syed Muhammad Ashraf Kuchchuvi, National President of All India Ulama and Mashayikh Board, World Sufi Forum and Chairman of Ghous Alam Memorial Educational Society, Imam Rabbani Mahboob Subhani Ghous Samdani Mujadadi Alf Thani Sheikh Ahmad Farooqi Sir Hindi Hanafi, may Allah bless him and grant him peace. Attended Mazar-i-Sharif https://t.co/30uEU7wehj	NIL	NIL	No_Hate
1563508013444796421	خنجر نہ ملا تو اس نے بیدمؔ آنڪھیں دڪھلا ڪے مار ڈالا 💕💗💕 #اپنی_زبان_اردو https://t.co/VDdKVstAR4	If he did not find the dagger, he died He killed by opening his eyes 💕💗💕 #Apni_Zaban_Urdu https://t.co/VDdKVstAR4	NIL	NIL	No_Hate
1568703461914542083	معصومہؑ فرماتی ہیں: باباحسینؑ وہ جو عیسائی تھےوہ میری دادی بتولؑ کو دیکھ کرسر نیچے کردیتےتھے، اور یہ مسلمان مجھے پتھراور تماچے کیوں مارتےہیں؟ 💔 https://t.co/XJ1GsOrIrX	Masooma (A.S) says: Baba Hussain (A.S), he who was a Christian used to lower his head when he saw my grandmother Batul (A.S), and why do these Muslims hit me with stones and slaps? 💔 https://t.co/XJ1GsOrIrX	معصومةفرماتی ‌ہیں:باباحسینوەجو عیسائی‌تھ وە٭میری دادی‌بتول کودیکھکرسَر نیچ کردیۃ تھ ۔۔ اوریمسلمانمجھ پتھراور تماج کیوں‌مارتے ہیں !!! ۲۸66۵1۸1:۴۵۸۲۱۱1۸۸۲۸۱۱؟9)۱۱۱	Masoomah says: Father, let us hear you Visit Christian and my Grandmother You were humiliated. And Muslims among stones Why kill Tamaj!!! 28665181:4582111882811?9)111	No_Hate
1578063397039624193	کراچی: پاکستان پیپلزپارٹی کے چیئرمین اور وزیر خارجہ بلاول بھٹو زرداری سے برطانوی پارلیمنٹ میں نائب قائد حزب اختلاف انجیلا رائنرکی ملاقات کراچی: چیئرمین بلاول بھٹو زرداری کے ہمراہ بی بی @AseefaBZنے بھی برطانوی لیبر پارٹی کی ڈپٹی لیڈر انجیلا رائنر سے ملاقات کی @BBhuttoZardari https://t.co/A1MnOScDYn	Karachi: Deputy Leader of the Opposition Angela Rainer met with Pakistan People's Party Chairman and Foreign Minister Bilawal Bhutto Zardari in the British Parliament. Karachi: Along with Chairman Bilawal Bhutto Zardari, BB @AseefaBZ also met Deputy Leader of British Labor Party Angela Rainer. @BBhuttoZardari https://t.co/A1MnOScDYn	NIL	NIL	No_Hate
1578035875769831425	@AzharSiddique 3 گھنٹے پہلے یہ بیان دیا ہے ۔ سازشوں اور افواہوں کا بازار گرم ہے ۔ اس کا ایک ہی مطلب ہے ، کوئی بہت بڑی کہانی پڑنے والی ہے اگلے ۲-۳ روز میں https://t.co/sM9ET9U9cN	@AzharSiddique made this statement 3 hours ago. The market of conspiracies and rumors is hot. It only means one big story is going to happen in next 2-3 days https://t.co/sM9ET9U9cN	‎۲0٥13۷ 6866 ۸۳۲‏ ۱۴ مزشتہ روز تی نل نے میرے بیان پر خلط پرابوگنڈا کیا-لانگ مار کے جوانے سے اریاں عاری ہیں نجاب وی سکی یہ ذہ داری بی وہ انگ مارچ میں شریک ریلیوںہقافلوں اور کارکنو ںکو سورٹی فا مکری ںکیسمیں عمران خان کے ساق ھکھڑا ہومیرے استظے کے ‏جوالے ےکوئی صداقت نس ‎90۱٥۹۰۸۱٥8088۲‏ ‏کے ے-_ : ‏4,559 ‏تی 0 0( 8ك 8 نف	205137 6866 832 14 Mazushta Roz Ti Nal did Khlat Praboganda on my statement - Long Mar Aryans are devoid of youth He escorted the caravans and workers participating in the march Imran Khan's legs are broken in the case of Fa Makri Jwale Ekoi Sadaqat Nas 90159081580882 K-_ : 4,559 Ti 0 0 ( 8K 8 Nf	No_Hate
1613302500916101129	فتنہ خان نیازی اخلاقی اور مالی طور پر ایک انتہائی کرپٹ شخص ہے ۔ عمران نازی کی چوری پہلے فارن فنڈنگ پکڑی گئی اور اب اس نے گھڑی چوری کا اپنے منہ سے اعتراف کر لیا ہے۔ #ملک_دشمن_گھڑی_چورر @pmln_org @Pmln_SMToffical @CMShehbaz @RanaSanaullahPK https://t.co/DAYNh56msw	Fitna Khan Niazi is a very corrupt person morally and financially. The theft of Imran Nazi was first caught by foreign funding and now he has confessed to the theft of the watch. #ملك_دشمن_غدي_خورر @pmln_org @Pmln_SMToffical @CMShehbaz @RanaSanaullahPK https://t.co/DAYNh56msw	ریاست مدینه اورنئے پاکستان کا کوں کے انل جس کے اپ ےکرفوت ایس میں 1۰-., *کھٹریاں رانا ٭ ادارول پرالزامات لگانا اللہ سے چے 2 )سس رخ ‎٠‏ لوگو ںکوفماداوراخفتقار راکسمانا صتت	State of Medina and New Pakistan Why? of which 10-. *Khatriya Rana * Allah to impose requirements on institutions Se Che 2 ) Sis Rukh 0. People are able to respect material and respect	Hate
1563035179999842304	@SaeedAChanna جس کے پالتو کتے ہو انھوں نے تیرے جیسے کئیوں کو استعمال کر کے کھڈے لائن لگا دیا۔۔ بیغرت صحافت سے بہتر ہے ہیرامنڈی کی دلالی کر لو۔ https://t.co/lRyV9Ucq7u	@SaeedAChanna who has pet dogs has drawn a line using many like you. It is better to mediate haramandy than bad journalism. https://t.co/lRyV9Ucq7u	NIL	NIL	Hate
1581292207675363328	#عوامی_لیڈر_عمران_خان اداروں سے کہتا ہوں غلط فہمی میں نہ رہیں تشدد کر کے عزت کروالیں گے،	#Awami_Leader_Imran_Khan I say to the institutions, don't be in a misunderstanding, they will be respected by violence.	لمےٗےےنں۔ے ‏ د 5لا ‎(٥٥‏ وو 33 ۸۸۸۱۶۳۱۸۸۷5ع7,ھ ض ۵۸۲ 4000 59300۷	Lmeyennene d 5 la (55 Wow 33 88816318875 AD 7, h Z 582 4000 593007	Hate
1614916781566726144	"ہمیں نہ صرف خوشحالی میں رسول اللہﷺ کی سُنت پر عمل کرنا چاہیے؛ بلکہ مصیبت میں بھی اُسے نہیں چھوڑنا چاہیے!" امام أحمد بن حنبل رحمه الله (حلية الأولِياء : 180/1) #TehreekLabbaikPakistan #افضل_البشر_بعدالرسل #ٹھپہ_کرین_پر https://t.co/IPqfGO4ZJz	"We must not only follow the Sunnah of the Messenger of Allah, peace and blessings be upon him, in prosperity; but we must not abandon him even in adversity!" Imam Ahmed bin Hanbal may God have mercy on him (Haliyyah al-Awliyyah: 180/1) #TehreekLabbaikPakistan #Afzal_Al-Bashir_Bad-ul-Rasal #stop_at_the_crane https://t.co/IPqfGO4ZJz	NIL	NIL	No_Hate
1605936110214995971	تحریک عدم اعتماد کی کارروائی، ایک دن باقی ، اسمبلیاں تحلیل ہونے کا خطرہ ٹَل گیا؟ رانا ثنا ءاللہ کی وارننگ، گورنرراج کا خطرہ برقرار، سیاسی تناؤ کم کیا جائے، صدرمملکت کا مشورہ دیکھئے پروگرام سوال نامہ آج رات 10 بجکر 03 منٹ پر صرف سنو ٹی وی پر https://t.co/LY4eYtGpWg	No-confidence motion, one day left, threat of dissolution of assemblies averted? Rana Sanaullah's warning, the threat of Governor Raj remains, political tension should be reduced, the President advises. Watch the program quiz tonight at 10:03 PM only on Suno TV https://t.co/LY4eYtGpWg	ہے عاص ر فیا بن رتجزیہ تار" مگ ہر خانع ۔دہکل ترک ضف غریدہ فاروقی ۔ می رتچزی کار رفا یٹ رج یکل گور خان ایا فید ضن ‏ ے کا ۰۳ 22 اخاد کاردوائی ...ایک دن بات اسہلیاںحلیل ہو ےکاجطردن لگید_۔_؟ ۰۳۸71۸0" ۰ رانا شا وایڈ کیا وارننگ ےو ر دا عکا خطرہ پر قرار۔-_ ۃ‌۵111/( ۵/ مہ 7 سای تناک مکیاجائے۔_ صد رمملل کا مٹورہ ‎٦‏ پیر سٹراعفظام امرالین کے زا	Hai As-e-Rafiya Ibn Ratjaziyyah Tar" Mag Har Khana. Rafaat Rijkal Gur Khan Ayyafid Zan 03 22 Akhad Kardawai ... one day talk Eshalian halil hoe kajtardan lagid_._? 0387180" 0 Rana Shaw issued a warning and statement on the danger.-_ 5111/( 5/ Mah 7 sai tanak should be made Pir Straifzam Amaralin K Zaa	No_Hate
1565259059586015232	@FarukhB63610508 @ItsFSW @jawadahmadone شرم نہیں وہ منافق اعظم کہا ہے ہیں کہا تم ہندو کے گھر پیدا ہوئے ہو تمہیں نیازی کا تو خیال ہے ناموس رسالت کا نہیں؟ https://t.co/4BA0A6ymBq	@FarukhB63610508 @ItsFSW @jawadahmadone no shame he said hypocrite He said, "You were born in a Hindu house, so you care about Niazi, not about the honorable prophet?" https://t.co/4BA0A6ymBq	NIL	NIL	Hate
1598938189426995200	@SeharShinwari یہ ملا فضلانڈو بھی تو ایک چکلے پر بیٹھا ہوا بھڑوا ہی تو ہے۔ کیا آپکو شک ہے؟؟؟ چکلا صرف رنڈیوں کا نہیں ہوتا 🤔 https://t.co/UbxwA14RTS	@SeharShinwari This Mullah Fazlando is also a rascal sitting on a stool. Do you have doubts? Chikla is not only for randis 🤔 https://t.co/UbxwA14RTS	NIL	NIL	Hate
1568906110639259649	گھر کی پالے دیسی مرغے کا بھی اپنا ہی صواد ہے یہ بھی بڑا شور کیا کرتا تھا اور مرغیوں کو تنگ کرتا تھا #ککڑی https://t.co/7tHPxOM4gb	Home grown native chicken also has its own taste It also made a lot of noise and disturbed the chickens #cucumber https://t.co/7tHPxOM4gb	NIL	NIL	No_Hate
1558402025657929728	@betterpakistan بنتے تم ارسطو ہو نکلے حنا پرویز بٹ زیرو آئی کیو والے ٹٹی دماغ پٹواری، ہر جگہ پر پاکستان کا پرچم اوپر لہرا رہا اور ساتھ نیچے پارٹی پرچم۔ تو اور تیری جھوٹی پارٹی پر اللّہ کی لعنت https://t.co/O6nh0pmD2v	@betterpakistan bante tum aristo ho nakele Hina Pervez but zero-IQ minded patwari, Pakistan flag flying above and party flag below. God's curse on you and your false party https://t.co/O6nh0pmD2v	NIL	NIL	Hate
1595846911281725440	@_ImranRiazKhan جس کے ہاتھ میں چادر نور الدین زنگی کی ہے۔ سر پر دستار امیر المجاھدین کی ہے نگا تاتا صاحب ذح اللّٰہ کی ہے چہرا حسن والا ہے سینہ اسلام سے منور ہے دل میں درد امت مسلمہ کا ہے سعد بن خادم حسین رضوی #TLP https://t.co/QvKyh0R716	@_ImranRiazKhan holding the chador of Nuruddin Zangi. The dastar on the head belongs to Amir al-Mujahideen, while the veil belongs to the great-grandfather The face is beautiful The chest is illuminated by Islam The pain in the heart belongs to the Muslim Ummah Saad bin Khadim Hussain Rizvi #TLP https://t.co/QvKyh0R716	NIL	NIL	No_Hate
1568885555449970691	منجانب! حمزہ ککڑی https://t.co/kktllhKfqt	From! Hamza Cucumber https://t.co/kktllhKfqt	NIL	NIL	Hate
1573970001740038147	عمران خان شاید واحد سیاستدان ہیں جو مقدمات کے بعد بھی بیمار نہیں ہوئے ورنہ یہاں تو کوئی ویل چیئر پر کوئی سٹریچر پر اور کوئی ملک سے ہی باہر بھاگ گیا #عمران_خان_بچائےگا_پاکستان https://t.co/cJKhv0L5WX	Imran Khan is probably the only politician who did not get sick even after the cases, otherwise here Some were in wheelchairs, some were on stretchers, and some ran out of the country #Umran_Khan_will_save_Pakistan https://t.co/cJKhv0L5WX	NIL	NIL	No_Hate
1579505291896717313	سوات میں بچوں کی سکول وین پہ حملہ میڈیا مکمل خاموش کیونکہ ملک مظبوط ہاتھوں میں ہے اس لیے بکاؤ میڈیا سچ نہیں بولے گا یہ کیسے محفوظ ہاتھ ہیں کہ کوئی بچہ بھی محفوظ نہیں... @gohar_ghr @GohareNayab555 @Aashi_2 @sanaKha63017607 @imrana_anwar https://t.co/g5gOS5yKnk	Attack on children's school van in Swat, media is completely silent because the country is in strong hands, so the media will not tell the truth. How are these safe hands that no child is safe... @gohar_ghr @GohareNayab555 @Aashi_2 @sanaKha63017607 @imrana_anwar https://t.co/g5gOS5yKnk	NIL	NIL	Hate
1614356436640751620	جوشی مٹھ سانحہ : سرکاری اداروں پرڈیٹا جاری کرنے پر پابندی عائد. نئی دہلی ،14جنوری:۔ اترا کھنڈ کے جوشی میٹھ میں زمین دھنسنے سے آرہی مکانوں میں دراڑیں وقت گزرنے کے ساتھ مزید گہری ہوتی جا رہی ہیں۔حکومت کی جانب سے راحت رسانی کا کام جاری ہے ،متاثرین کو م https://t.co/t0Z8iNiV1p https://t.co/dm1QdlnwMV	Joshi Math Tragedy: Ban on release of data from government agencies. New Delhi, January 14: The cracks in the houses due to land subsidence in Joshi Meth of Uttarakhand are getting deeper with the passage of time. The relief work is going on by the government, the affected people are https://t.co/t0Z8iNiV1p https://t.co/t0Z8iNiV1p https:/ /t.co/dm1QdlnwMV	NIL	NIL	No_Hate
1573671435729518592	تمام دوستوں سے گزارش ہے جلدی سے اس ٹیویٹ کو ری ٹیویٹ کرو شاباش جلدی کرو Just retweet #تھوک_والا_وزیراعظم #وزیراعظم_نہیں_لعنتی_اعظم #سازش_نہیں_تھا_خارش_تھا_خارش #عمران_خان_سچا_عاشق_رسول #امپورٹڈ_حکومت_نامنظور. #ٹرانسجینڈر_بل_نامنظور https://t.co/Z6GEpcTaCT	All friends are requested to quickly retweet this tweet Just retweet #Wholesale_Prime Minister #Prime Minister_not_Damn_Azam #The plot did not itch #Imran_Khan_Sacha_Ashaq_Rasul #imported_government_disapproved. #transgender_bill_disapproved https://t.co/Z6GEpcTaCT	گستاخبھیحرامی بی ہے ابیاترائی ٦ ‏۱ع‎ ۸ ۶۶٤ ۱۸ 8 ‏۱۴۰۲۳۸۴۱ھ8۸‎ ۰۰۸۷	Insolent B is Abiatrai 6 1 A 8 664 18 8 14023841 H88 0087	Hate
1578660058203795457	گمشدہ کی تلاش، سنی دیول کے خلاف پوسٹر لگ گئے۔۔بھارتی اداکار سنی دیول بی جے پی کا رکن اسمبلی بھی ہے۔ رکن اسمبلی بننے کے بعد وہ ایک دفعہ بھی گورداسپور نہیں گیا۔ پٹھان کوٹ کے شہریوں نے لاپتہ رکن اسمبلی کے پوسٹر لگانے شروع کر دیے۔ https://t.co/0mjXKpMe4J	Search for the missing, posters against Sunny Deol. Indian actor Sunny Deol is also a member of the BJP assembly. After becoming Member of Assembly, he did not go to Gurdaspur even once. The citizens of Pathankot started putting up posters of the missing MLA. https://t.co/0mjXKpMe4J	NIL	NIL	No_Hate
1578752139014574081	رانا باندری کی سو دھمکیوں کے جواب میں صرف ایک وارنٹ سالا ایک وارنٹ نے رانے کو ہیجڑا بنادیا https://t.co/msvTC0SrG7	Just one warrant in response to Rana Bandri's hundred threats Sala a warrant made Rane a eunuch https://t.co/msvTC0SrG7	تح مآ و سی ؛جیم پک رنہ بیٹھ جانا اسلا مآ باد یہ چڑعا ‏ ےتا بر بھی تر کم سے وعردے رانافنالل آلتڈ اپنے ق کے مطابق بای نکیاکریل٠‏ 71 ا باہم بھی ہو سا سے نواد چومدری اڑا فرساہ	Tah maa and c ; Jem Pak rana to sit down God bless you Even less Ranafnalal Altd According to his q 71 a Be with each other Nawad Chaumdri Uda Farsah	Hate
1560608120551968768	پھٹکار!! جیسا کھسرا بن جاتا ہے انجام کو پہنچ گیا ،پہلے لوگ جب گناہ کرتے کھسرا بندر بن جاتے تھے https://t.co/bEO0KgXHQr https://t.co/6LyAp4Fnti	Explosive!! As the measles becomes the end, the first people when they sinned became the measles monkeys https://t.co/bEO0KgXHQr https://t.co/6LyAp4Fnti	NIL	NIL	Hate
1565752784976232449	@PmlnKhokharani یوتھیوں، چند ججوں جرنیلوں نے یہ کہاوت سنی پڑھی مگر انہیں نیازی کتا نہیں نیازی اسمتھ نظر آیا، پھر وہ نیازی اسمتھ اور اپنے یہودی مالک کے سامنے دم ہلانے لگے۔پاکستان میں اب وطن فروش ہیرو اور محب وطن چور،غدار قرار دیے جاتے ہیں۔ پاکستان انہی اللہ سے نا ڈرنے والوں کا گڑھ بن چکا ہے https://t.co/UnMiGCWHgW	@PmlnKhokharani Jews, a few judges and generals heard this saying, but they saw Niazi's dog, not Niazi Smith, then they started shaking their tails in front of Niazi Smith and his Jewish master. go Pakistan has become the stronghold of those who do not fear Allah https://t.co/UnMiGCWHgW	‎۷٢٣۷/۶ 81 ٥5۷۲۱۷۵۶ 8٢6 6‏ ج2 ج2 ج2 62 ج2 62 ج2 626 2۵ ‎)5١٥۰‏	7237/6 81 55721756 826 6 C2 C2 C2 62 C2 62 C2 626 25 (5150)	Hate
1558024165059354626	@iihtishamm جنہوں نے ملک کی بیڈ بجائی ہے نا اب ان کی گانڈ پھٹی پڑی ہے🤣🤣🤣🤣 https://t.co/uuToH2tiVs	@iihtishamm who played the country's bed, now his ass is cracked 🤣🤣🤣🤣 https://t.co/uuToH2tiVs	NIL	NIL	Hate
1617787203241017346	اوّل تو ، میـســـــر ہی نہیں ھوتــے کسی کو خوش بختی سے مِل جائیں تو وَافر نہیں ھوتے ھم پاؤں بھی پھیلائیں تو محتاط بہتـــــ ھیں چَادر سے ، یا اوقاتـــــــ سے باہر نہیں ھوتے #اردو_شاعری #اردو_ادب https://t.co/tUfjlZztUz	First of all, it is not available to anyone If they meet with happiness, they are not abundant We are very careful if we spread our feet They don't come out of the bed, or out of time #Urdu_Poetry #Urdu_Adab https://t.co/tUfjlZztUz	NIL	NIL	No_Hate
1566623840494567424	ہماری سٹی کشمور سے تعلق رکھنے والے اس راہول رامانی ہندو نے جمعہ کے دن تاریخ 2 ۔9۔2022 کو ڈھرکی درگاہ عالیہ بھرچونڈی شریف میں اسلام قبول کیا اب اس بندے کا نام راحیل احمد ہے ماشاء اللہ اس بھائی کے لئے ہم تمام مسلمان دعائیں کریں https://t.co/MOR9s0Sz93	Belonging to our city Kashmore This Rahul Ramani Hindu accepted Islam on Friday 9/2/2022 at Dharki Dargah Aliya Bharchondi Sharif. Now this man's name is Raheel Ahmed. Masha Allah, let us all Muslims pray for this brother https://t.co/MOR9s0Sz93	5 0 6662(7	5 0 6662(7	No_Hate
1581312562209394694	ڈی پی او ایبٹ آباد جتنی مرضی تیاری کرلو ابو آرہے ہیں۔ یہاں یوٹرن والی آپشن نہیں ہے کل بروز اتوار صبح 10 بجے انشاءاللّٰہ امیر محترم حافظ سعد حسین رضوی حویلیاں میں میلاد النبیﷺ جلوس کی قیادت ضرور کریں گے۔بھرپور تیاریاں اور والہانہ استقبال ہوگا https://t.co/6yTZRWZVGQ	DPO Abbottabad, prepare as much as you like, Abu is coming. There is no uterine option Tomorrow, Sunday at 10 am, God willing, Amir Hafiz Saad Hussain Rizvi will definitely lead the Milad-ul-Nabi procession at Haveliyan. There will be a lot of preparations and a warm welcome https://t.co/6yTZRWZVGQ	NIL	NIL	No_Hate
1588200950094712833	بونیر؛ مین چوک سواڑی بازار میں عمران خان پر فائرنگ کرنے کے خلاف زبردست احتجاج ۔ خان صاحب ھم سب اپ کے ساتھ ھیں.اپ ھی ھمارے آخری امید ںو۔ اللہ اپ کو جلد صحتیاب کریں۔ Now wait for the Tsunami buzdilloo. @PTIofficial @ImranKhanPTI #ImranKhan #firing #عمران_خان_ہماری_ریڈ_لاین_ہے https://t.co/TeYe2cQjHS	Bonaire; Huge protest against firing on Imran Khan in Main Chowk Swadi Bazar. Khan Sahib, we are all with you. You are our last hope. May Allah heal you soon. Now wait for the Tsunami buzdilloo. @PTIofficial @ImranKhanPTI #ImranKhan #firing #Umran_Khan_is_our_red_line https://t.co/TeYe2cQjHS	NIL	NIL	No_Hate
1573326554901676032	برگیڈ میں #مشترکہ_امن_جرگہ کا انعقاد ہوا قباٸلی ضلع کرم کے صدرِ مقام پاراچنار شہر میں موجود مسلح افواج کے 73 برگیڈ میں غیر یقینی صورتحال کے پیشِ نظر اپر ،لوئر اینڈ سنٹرل کرم کے معزز مشران کیساتھ مشترکہ امن جرگہ منعقد ھوا۔ #PakArmySavingNation #Pakistan https://t.co/a2wJmjnGC6	#Joint_Aman_Jirga was held in Brigade In view of the uncertain situation in the 73 brigade of the armed forces in Parachinar city, the headquarter of the tribal district of Karam, a joint peace jirga was held with the respected leaders of Upper, Lower and Central Karam. #PakArmySavingNation #Pakistan https://t.co/a2wJmjnGC6	NIL	NIL	No_Hate
1566056503378939906	پنجابی قوم پرستی کا آغاز کب ' کیوں ' کیسے شروع ھوا تھا؟ پاکستان میں سب سے بڑی آبادی پنجابیوں کی ھے۔ پنجابی مسلمان کمیونٹی امتِ مسلمہ میں تیسری سب سے بڑی کمیونٹی ھے۔ پنجابی قوم جنوبی ایشیا کی تیسری سب سے بڑی قوم ھے۔ پنجابی قوم دنیا کی نوویں سب سے بڑی قوم https://t.co/4nfQ6o2R0F https://t.co/6tZqz7LkhV	When did Punjabi nationalism start? Why? How did it start? Punjabis are the largest population in Pakistan. The Punjabi Muslim community is the third largest community in the Muslim Ummah. Punjabi nation is the third largest nation in South Asia. Punjabi nation is the ninth largest nation in the world https://t.co/4nfQ6o2R0F https://t.co/6tZqz7LkhV	NIL	NIL	No_Hate
1593201280843145217	#وطن_کا_رکھوالا_عمران_خان یہ سارا مافیا ایک طرف اور عوامِ پاکستان ایک طرف اور جیت انشااللّہ عوام کی ہوگی https://t.co/y3pv4echIh	#وطن_كا_رخوالا_IMRAN_KHAN All this mafia on one side and the people of Pakistan on the other side and victory will be for the people inshallah https://t.co/y3pv4echIh	ً ۱ ۲ ا اض >۴ .- ۳ کے کرٹ فام کے "یں کو ما کا ے	1 2 and >4.-3 "Kurt Pham's"	Hate
1577915482933452801	#ایران کی مشـرقی #عراق کے علاقے #سلیمانیہ پر پھر #بمباری https://t.co/5XwfajcnaD https://t.co/WlO87WBukR	#Bombing again on #Sulaymaniyah, eastern #Iraq region of #Iran https://t.co/5XwfajcnaD https://t.co/WlO87WBukR	اردو 00 شے ڈ ق3 یران کی مشرقی عراق کے علاقے سلیمانیہ پر پھر بمباری :	Urdu 00 Item Q3 Iran's Sulaymaniyah region of eastern Iraq But then the bombardment:	No_Hate
1573972860087025665	مانا کھوتا اب یہاں پیش ہوکر یہ کہنے کیلئے تیار ہے۔۔۔ کہ میں نے عدالت میں "لد" نہیں کی۔۔۔ بلکہ میری نکل گٸی تھی۔۔۔ میں اپنی لد اٹھانے کو تیار ہوں۔ 🤣🤣🤣🤣🤣🤣 https://t.co/7ub32Elzcw	Mana Khota is now ready to appear here and say this. That I did not "lay" in the court. Rather, I had left. I am ready to take my load. 🤣🤣🤣🤣🤣 https://t.co/7ub32Elzcw	NIL	NIL	Hate
1568310508654313473	پیر طریقت ، رہبر شریعت ، بقیۃ السلفیہ ، فصیح السان ،لذیذالبیان؛ حضرت مولانا ایمل ولی خان دیوبندی دامت برکاتہم العالیہ ، مہتمم جامعہ انگازیہ سلسلہ باچاخانیہ النشنلیہ الدولکیہ الماکان چارسدیہ شریفیہ ۔ (نوٹ صرف ضمنی الیکشنیہ) @AimalWali Lalteen tabha dy https://t.co/uum4pzTXvV	Peer Tariqat, Leader of Shariat, Baqiyyah Salafiyyah, Fasih al-Saan, Ludhizul Bayan; Hazrat Maulana Amil Wali Khan Deobandi Damat Barkatham al-Alia, Mahtamim Jamia Angazia Silla Bachakhaniyyah Al-Nashniyyah Al-Dawlakiya Al-Makan Charsadiya Sharifiya. (Note only by-elections) @AimalWali Lalteen tabha dy https://t.co/uum4pzTXvV	NIL	NIL	No_Hate
1587451587307323392	بے ہوش ہوگئی اپ کا جواب سن کر ڈرامے باز عورت 😜 https://t.co/MBQxOChSoP https://t.co/qO8d7AIjoo	I fainted after hearing your answer, the dramatist woman 😜 https://t.co/MBQxOChSoP https://t.co/qO8d7AIjoo	NIL	NIL	Hate
1565261932520783872	نریندر مودی سمیت اہم بھارتی شخصیات کیخلاف امریکی عدالت میں مقدمہ درج مزید تفصیلات: https://t.co/CSVkCXQm7z https://t.co/Plo3Xujmz9	A case has been registered in the American court against important Indian personalities including Narendra Modi More details: https://t.co/CSVkCXQm7z https://t.co/Plo3Xujmz9	NIL	NIL	No_Hate
1587751713825603585	پی ٹی آئی اور پی ڈی ایم بری طرح ناکام ہوئے #حل_صرف_جماعت_اسلامی #لڑائی_ساری_فیڈرکی https://t.co/IvgbvcboIM	PTI and PDM failed miserably #Hal_only_Jamaat_Islami #Fight_All_Federkey https://t.co/IvgbvcboIM	NIL	NIL	No_Hate
1614466019501694977	سعودی عرب کے سرد علاقوں میں ٹھنڈ سے بچاؤ کے لیے الفروۃ (فرکوٹ) کا رواج بڑھنے لگا ہے۔ یہ بھیڑ کی اون سے تیار کیے جاتے ہیں۔ #UrduNews #SaudiArabia تفصیلات: https://t.co/hgv0V9zV8N https://t.co/BdpSAfWD5t	In the cold regions of Saudi Arabia, the practice of al-farwat (farkot) is increasing to protect against the cold. They are made from sheep wool. #UrduNews #SaudiArabia Details: https://t.co/hgv0V9zV8N https://t.co/BdpSAfWD5t	شح شخصیات نے بھی اشعار - ‎٥۶۸۷٦٦۷۷۰۰.‏ ہہ ۴+۔	Shah personalities also wrote poems - 5687667700. Huh 4+.	No_Hate
1580131510585217024	شیطان خان کوئ لیڈر نہیں یہ پلیت پاکستان میں قوم لوط کا نمایئندہ ہے شیطان خان کی اپنی سابقہ بیوی ریحام خان کے اپنے ہاتھوں سے لھکی کتاب کے صفہ نمبر 272سے اقتباس https://t.co/KlKGeWwUkE	Shaitan Khan is not a leader. He is a representative of the nation of Lut in Pakistan. Quote from page number 272 of Shaitan Khan's book written by his ex-wife Reham Khan's own hands https://t.co/KlKGeWwUkE	NIL	NIL	Hate
1563810603994677248	گزشتہ 8 دن سے گردوارہ سنگت سبی اور اقلیتی ھندو برادری سبی بلوچستان کی طرف سے سیلاب متاثرین کے لیے 500 کے قریب کھانا اور چھوٹے بچوں کے لیے بسکٹ فیکٹری دوسھ کے پارسل تیار کیے جارہے ہیں #Balochistan #FloodsInPakistan #MinoritiesInPakistan #SavePakistan https://t.co/g2G5GiDeYo	For the past 8 days, Gurdwara Sangat Sabi and minority Hindu community Sabi Balochistan have been preparing around 500 food parcels for flood victims and Biscuit Factory Dosh for small children. #Balochistan #FloodsInPakistan #MinoritiesInPakistan #SavePakistan https://t.co/g2G5GiDeYo	NIL	NIL	No_Hate
1581314415957200898	قومِ لوط منافق پٹواری قادیانی https://t.co/WOSG4Y1DKw https://t.co/MXn2L124yc	The hypocritical nation of Lot, Patwari Qadiani https://t.co/WOSG4Y1DKw https://t.co/MXn2L124yc	NIL	NIL	Hate
1606641216241733633	کروڈپتی اسوری پکڑا گیا 😭 استور کو آپریٹو بنک فراڈ کیس میں مطلوب مرکزی ملزم رفاقت کو گلگت بلتستان پولیس کے سپیشل انویسٹیگشن ٹیم نے سندھ سے گرفتار کر دیا ۔ https://t.co/trw2QoCsOJ	Crorepati Asuri was caught 😭 The main accused in the Astor Operative Bank Fraud Case, Raffakat, was arrested by the Special Investigation Team of Gilgit-Baltistan Police from Sindh. https://t.co/trw2QoCsOJ	NIL	NIL	No_Hate
1562995925454180352	@Rajpoot_PML_N یوتھیوں کو مولوی ڈیزل تب ہی یاد آتا ہے جب انہوں نے اپنی ٹنکی فل کروانی ہوتی ہے۔ 🤣🤣🤣 https://t.co/dUHvoOpmqL	@Rajpoot_PML_N youths remember Maulvi Diesel only when they have their tinky fill. 🤣🤣🤣 https://t.co/dUHvoOpmqL	NIL	NIL	Hate
1598999571874447360	بیغرت انسان ملک تباہ کرکے گمنام ہوگیا ! غدار ڈاکو https://t.co/ddMM7fMxv4	A cowardly person became anonymous by destroying the country! Treacherous Bandits https://t.co/ddMM7fMxv4	NIL	NIL	Hate
1580118551595130880	@realikramnasim عالم زمین پراللہ تعالی کی دلیل ہوتاہے۔ جوعالم شریعت سے رتی برابربھی ہٹاوہ عالم نہیں ظالم ہے۔اورظالم کوعالم کہنے والااس سے بڑاظالم ہے۔ تم مولوی کے روپ میں شیطان ہوتم ہی وہ مولوی ہو۔جنہوں نے ہم جنس پرستی کے بل کی حمایت کی۔خان صاحب کے خلاف بولتے ہو۔پہلے اپنے گریبان میں جھانکوں https://t.co/eK8H5LJJb5	@realikramnasim Allah's argument is on the world. A scholar who is even remotely removed from Shari'ah is not a scholar who is a tyrant is more cruel than You are the devil in the guise of a cleric. You are the cleric who supported the bill of homosexuality. You speak against Khan Sahib. Look into your neck first https://t.co/eK8H5LJJb5	علماء سے ہی سنتے آ رہے ہیں کہ ایک لڑکی کو اپنے شوہر کے بھائی سے بھی پردہ کرنا چاہبے پلیز کوئی سمجھا دیں یا تو یہ صاحب غلط ہے یا پھر وہ سارے علماء غلط بول رہے إحػۃ	We have been hearing from scholars that a girl should marry her husband If you want to hide from your brother, please explain This man is wrong or all those scholars are speaking wrongly	Hate
1568099654738345984	ہمارے شہزادے کی اس تصویر کو اتنا ریٹویٹ کرو جیالے اور عمرانڈو سڑ سڑ کے کولا ہو جائیں ✌️✌️ #AllamaKhadimHussainRizvi #TLP_Promotion https://t.co/EqVVzDCz0C	Retweet this picture of our prince so much Jayale and Imrando will rot. ✌️✌️ #AllamaKhadimHussainRizvi #TLP_Promotion https://t.co/EqVVzDCz0C	NIL	NIL	Hate
1587664602921304064	نکالا مجھ کو جنت سے , فریبِ زندگی دے کر دیا پھر شوق جنت کا , یہ حیرانی نہیں جاتی https://t.co/1TIubbFwGF	Expelled me from paradise, giving me the illusion of life Given then the love of heaven, this is not surprising https://t.co/1TIubbFwGF	NIL	NIL	No_Hate
1565187830435004416	@hinaparvezbutt ویسے بھی تیری شرم تو گھاس کھانے گئی ہے ۔ بے شرم نسلی رک۔۔۔۔۔ل۔۔ https://t.co/XcvwrtVxVF	@hinaparvezbutt anyway your shame has gone to grass. Shameless racist. https://t.co/XcvwrtVxVF	NIL	NIL	Hate
1608550654695333890	پاکستان کی بربادی کا معمار یہ الُو کا پٹھہ ہے https://t.co/lSL1A8itf4	The architect of Pakistan's destruction is this owl's leg https://t.co/lSL1A8itf4	NIL	NIL	Hate
1596188895032623105	السلام و علیکم ورحمتہ اللہْ جی آج جمعۃ المبارک کو فیصل آباد ماڈل بازار جھنگ روڈ حکومت پنجاب کی طرف سے سستا آٹا دینے کا اعلان کیا تھا فیصل آباد میں مافیا یہ آٹا بلیک کر کے رکشوں اور ویگنوں میں برابر کے لے کے جا رہے ہیں ان لوگوں کو کوئی پوچھنے والا نہیں ہے https://t.co/oXQ7TYWR32	Assalamualaikum and Rahmatullah ji, on Friday, Faisalabad Model Bazaar, Jhang Road, Punjab government had announced to give cheap flour. There's no asking https://t.co/oXQ7TYWR32	NIL	NIL	No_Hate
1592923008024580096	کچھ فیصلے خود کشی کی ماند ہوتے ہیں ۔مشکل ،سفاک ،مایوس کن ،دل شکن لیکن کرنے پڑتے ہیں ۔ روشنی یونہی نہیں ملتی کچھ نا کچھ جلانا ضرور پڑتا ہے ۔ ❤ https://t.co/GPzbykcfzD	Some decisions are suicidal. Difficult, brutal, frustrating, heartbreaking, but they have to be made. Light is not always available, something has to be burned. ❤ https://t.co/GPzbykcfzD	NIL	NIL	No_Hate
1617703717113057280	مقبوضہ کشمیر میں بھارتی خفیہ ایجنسی را کا گھناؤنا کھیل راجوری ضلع میں مسلمانوں کو محکوم بنانے کے لیے ہندوؤں (آر ایس ایس) کے مذہب کی تربیت دی جا رہی ہے، 30 ہزار بندوقیں تقسیم کی جا چکی ہیں۔ یہ ہے بھارتی سیکولرازم کا مکروہ چہرہ #ReleaseHurriyatLeadership @BKYMofficial https://t.co/JABEXiteIi	The dirty game of Indian secret agency RAW in Occupied Kashmir In Rajouri district, the religion of Hindus (RSS) is being trained to subjugate Muslims. 30 thousand guns have been distributed. This is the ugly face of Indian secularism #ReleaseHurriyatLeadership @BKYMofficial https://t.co/JABEXiteIi	NIL	NIL	No_Hate
1595651075251572736	@YasirBaig111 @MAB_Sultan جی آپ نے درست کہا یاسر بھائی الحمدللہ عزوجل اس ایک مبلغ دعوت اسلامی کے ہاتھوں پر 3500 کفار مسلمان ہو چکے اور یہ سب وہاں پر مساجد اور دین اسلام کی دعوت دینے سے ہوا اور کفار کی چیخیں آسمان کو چھو رہیں ابھی تو اور دیکھیے دعوت اسلامی کیا کیا کرتی #Dawateislami https://t.co/njJlcGxa1l	@YasirBaig111 @MAB_Sultan Yes you are right yasir bhai Alhamdulillah, 3500 infidels have become Muslims at the hands of this one preacher of Dawat-e-Islami, and all this happened because of inviting mosques and Islam. And the cries of the infidels may touch the sky Now look at what Dawat-e-Islami did #Dawateislami https://t.co/njJlcGxa1l	غیر مسلم نے اسلام قبول کیا.۔! مولانزاعثان عطار ی ال گے وہ تفمی ہیں جن کے بات پر اب کک تق ]500 3غی رمسلم اسلام قو لیے ہیں۔	Non-Muslim accepted Islam..! Molanza'atan Attar y Algae are the tafmi on whose words Now, about 500,000 non-Muslims have embraced Islam.	No_Hate
1566741061778767872	چیرمین پی ٹی آئی @ImranKhanPTI کی سندھ کے سینئر رہنماؤں سے ملاقات ۔ سندھ میں سیلاب سے ہونے والی تباہ کاری اور ریلیف پروگرام کے حوالے سے مشاورت #InsafReliefProgram https://t.co/5KWRhldzNY	Chairman PTI @ImranKhanPTI meeting with senior leaders of Sindh. Consultancy regarding flood disaster and relief program in Sindh #InsafReliefProgram https://t.co/5KWRhldzNY	NIL	NIL	No_Hate
1613164568565649409	رضا کے نام کا نعرہ لگے گا خانقاہوں میں شعارِ اہلسنت ہے کوئی تحقیر تھوڑی ہے رضا سے جلنے والے رافضی کتوں سے کہہ دیجیے در خواجہ تمہارے باپ کی جاگیر تھوڑی ہے۔ #Boycott_Rafzi_Mujawar @92Ashfaque https://t.co/aaaUSINXBN	Raza's name will be chanted in monasteries The motto of Ahl-e-Sunnah is no contempt Say it to the greedy dogs who burn with pleasure Your father's estate is small. #Boycott_Rafzi_Mujawar @92Ashfaque https://t.co/aaaUSINXBN	کے چ	K Ch	Hate
1616976777137487872	@AtifRehman0007 @CMShehbaz یہ منی لانڈر کرائم منسٹر شہباز شریف ہیی https://t.co/66mOZYL2ah	@AtifRehman0007 @CMShehbaz This Money Launderer Crime Minister Shehbaz Sharif https://t.co/66mOZYL2ah	گور ےھوباز 52668 ‎٤‏ ً60 ٤	Gor Yehobaz 52668 4 60 4	Hate
1578962170125381633	@Moazzam__Rana @sardarsaabNA15 آہو.. ہیگے نے اے سالے 🙈🙈🙈🤣🤣🤣 https://t.co/A7eYxth0uq	@Moazzam__Rana @sardarsaabNA15 Aha.. Hege Ne O Sale 🙈🙈🙈🤣🤣🤣 https://t.co/A7eYxth0uq	NIL	NIL	No_Hate
1607880059234271232	چرسی کڑاہی 😌 https://t.co/QxUSYxHLYR	Charsi Kadhahi 😌 https://t.co/QxUSYxHLYR	NIL	NIL	No_Hate
1617084197276983296	پیپلز پارٹی پر نوازشات کیوں کی جارہی ہے ٹوپی والوں کی کیا کمزوری ان کے ہاتھ لگ گئی ہے کراچی عوام نے ووٹ نہیں دیا لوگ پینے کے پانی کیلئے ترس گئے ٹوٹی سڑکیں سٹریٹ کرائم بہت ذیادہ پر بھی ٹوپی والوں نے جتایا کیاحافظ کو رپورٹ نہیں دی جاتی مکمل اندھیرے میں رکھا جاتا ہے #StopDirtyGames https://t.co/luPKNolOlH	Why is the people's party being showered with blessings, what is the weakness of the hat people? People of Karachi did not vote People were thirsty for drinking water Broken roads and street crime are rampant But the hatters also won No report is given to the custodian It is kept in complete darkness #StopDirtyGames https://t.co/luPKNolOlH	NIL	NIL	Hate
1580882994944159746	@hinaparvezbutt تیری پھدی میں اسکا گردن https://t.co/d088VBzEsk	@hinaparvezbutt her neck in your throat https://t.co/d088VBzEsk	NIL	NIL	Hate
1593162872602796032	آج آپ لوگوں کو میں انٹرنیشنل چور سے ملواتا ہوں یہ ہے ہمارا پیارا کرائم منسٹر آس سے بڑ کر آسکا دوسرا بھائی چور ہے جسکا نام یے نواز شریف سنو سنو آسکو ڈیگی والا وزیراعظم بھی کہتے ہیں #شریف_امداد_خور https://t.co/eJ0R7MjShL	Today I introduce you guys to International Thief This is the second brother of our beloved crime minister, Nawaz Sharif Sano Sano Asko is also called Degi Wala Prime Minister #Sharif_Amdad_Khor https://t.co/eJ0R7MjShL	0 َ کے 101201011010۷ (00	0 of 1012010110107 (00	Hate
1581376002059485184	@hinaparvezbutt یہ مچذوب اس قسم کی واہیات، لغو اور بیہودہ قسم کی پوسٹس کرکے انصافینز کو غصہ دلا کر گالیاں کھاتی ہے۔ بیسیوں پوسٹس کیبعد رات کو اپنا نام سب سے زیادہ پوسٹس کی لسٹ میں اپنا نام لا گر پھر اپنی مالکن کو ٹویٹ کرتی ہے کہ “باجی دیکھیں میں آپکے لۓ کس کس کے ہاتھوں ذلیل ہوتی ہوں”- https://t.co/KgZTjGVJhd	@hinaparvezbutt This Machzoob makes insults by angering the Insafins by posting this kind of absurd, absurd and absurd type of posts. After twenty posts, Nata gets her name in the list of most posts and then tweets to her mistress that "Baji see I am humiliated by whom are you?"- https://t.co/KgZTjGVJhd	شاب شی ضا ایر پاش جاری رھ بہت 7	7	Hate
1568739476154863617	@Atifrauf79 ابے او چوتڑ نواز شریف چور ہے پوری قوم کوپتہ ہے بےکار اناپ شناپ نا لکھا کرو اب کیا سب کو پٹواری سمجھا ہوا ہے 🤦‍♂️ https://t.co/8Jlt3hqqiv	@Atifrauf79 Abey O Chautar, Nawaz Sharif is a thief, the whole nation is a loser, don't write, don't write, now everyone is considered a patwari 🤦‍♂️ https://t.co/8Jlt3hqqiv	70 شاباش میرے 207 74ھ] کون گبرت رھ 00-0 7	70 Well done my 207 74 AH] Who is the greatest? 00-0 7	Hate
1568129830839025664	میں عمران خان کے ساتھ ہوں کیونکہ وہ واحد لیڈر ہے جس نے ہمیشہ اداروں کا احترم کیا ہے اور آج وہ ہماری آنے والی نسلوں کی بقا کی جنگ لڑ رہے ہیں ۔۔۔ #IStandWithImranKhan https://t.co/TpoXO4QRKX	I am with Imran Khan because he is the only leader who has always respected institutions and today he is fighting for the survival of our future generations. #IStandWithImranKhan https://t.co/TpoXO4QRKX	تمہارےساتھہوں! ‏ 287 تھے لگ ے۔-۔- 1س _- ۳ك	With you! , There were 287 Look .-.- 1S _- 3K	No_Hate
1559915874911506435	جج زیبا چوہدری ہمارے نظام انصاف کا ایک اور مکروہ کردار ہے جسے معلوم ہے کہ یہ جسمانی ریمانڈ کیوں لیا جا رہا ہے۔۔مکروہ فیصلے کرنے والے سیاہ کردار منصفوں کو موت یاد نہیں. دباؤ نہیں برداشت کر سکتے تو کرسی کیساتھ کیوں چمٹے ہو #PakistanUnderFascism https://t.co/fHLbQTFwj4	Judge Zeba Chaudhry is another disgraced character of our justice system who knows why this physical remand is being taken. The black characters who make disgraceful decisions do not remember death. If you can't bear the pressure, why are you clinging to the chair? #PakistanUnderFascism https://t.co/fHLbQTFwj4	NIL	NIL	Hate
1606885447665606658	فرقہ پرستی شخصیت پرستی اور خاندانی جاگیرداری سے بغاوت کرنے والے علماء کرام وتمام پولٹیکل ورکرز کو جماعت اسلامی میں شمولیت پر خوش آمدید کہتے ہیں مردان جمیعت علماء اسلام سے مولانا قاری ابوبکر صاحب کا جماعت اسلامی میں باقاعدہ شمولیت کا اعلان ہمارا نصب العین عملاً اقامت دین ❤️ https://t.co/0YlLNQ5xSu	Communalism Personalism and Family Feudalism Rebels from Scholars and all political workers are welcome to join Jamaat-e-Islami Maulana Qari Abu Bakr from Mardan Jamiat Ulema-e-Islam The announcement of formal joining of Jamaat-e-Islami Our motto Actually Iqamah Deen ❤️ https://t.co/0YlLNQ5xSu	NIL	NIL	No_Hate
1606742097977122817	اج ایسے شخص کی برسی ہے جس کے کردار، اخلاق اور صحبت کے اس کے مخالف بھی گرویدہ تھے اور اج بھی... اتنے سالوں بعد بھی... جہاں لوگ اپنے پیاروں کو بھول جاتے ہیں نہیں بھولتے تو اسکو جس کو کراچی کی سڑک پر بے گناہ بے یار و مددگار گھر کی دہلیز پر ماں کی گود میں بچوں کے سامنے قتل کردیا گیا https://t.co/gN8OFOeKWA	Today is the anniversary of such a person Whose character, manners and company His opponents were also convinced And today too... Even after so many years... Where people forget their loved ones Don't forget it To whom On the road to Karachi innocent Helpless On the threshold of the house In mother's lap In front of children Murdered https://t.co/gN8OFOeKWA	NIL	NIL	No_Hate
1578741214484254721	ماشاءاللہ اپنے قائد جناب وزیراعظم پاکستان عمران آحمد خان نیازی کہ ساتھ سرکٹ ہاوس فخر چہکان ناظم ملک ریحان ساہی نوید احمد بادوزئی ناظم عصمت اللہ گومل کونسلر ملک جمشید بچہ شاھد بلوچ۔ ❤️❤️❤️ https://t.co/0S1HzlFcD3	Mashallah Your leader Mr. Prime Minister of Pakistan Imran Ahmed Khan Niazi Ke Saath Circuit House Fakhr Chehkan Moderator Malik Rehan Sahi Naveed Ahmed Baduzai Moderator Ismatullah Gomal Councilor Malik Jamshed Bacha Shahid Baloch. ❤️❤️❤️ https://t.co/0S1HzlFcD3	4۸ , 09 1208۲ء6 0318 ۱۸6٥ 9 ٭ ند8 ‎۴٣۵۸‏ ے ۱٢ ‏جانا‎ ×٭ اہ ‎8۷۱۱٥٥1‏ اعت جم( 171 006 لے ٥+انا‏ ۲۰-	48, 09 12082-6 0318 1865 9 * Nad8 4358 12 Go 8711551 Gym (171 006 take 5+ana) 20-	No_Hate
1593618449053384704	@Rab1122330 عطا ٹر ٹر @TararAttaullah کے بریف کیس والے منافق دادے کو کل 74 تحائف ملے اور وہ موصوف سب کے سب اپنے گھر لے گئے یعنی مبلغ 1900 روپے فی تحفہ۔ اس سے تو لگتا ہے کہ موصوف کو صرف تسبیح اور ٹوپی کا ہی تحفہ ملتا تھا 🤨🤨 https://t.co/dI6OdPKzUb	@Rab1122330 @TararAttaullah's hypocrite grandpa with briefcase got 74 gifts in total and he took them all to his house i.e. preacher 1900 rupees per gift. From this, it seems that the said person used to receive only tasbih and cap 🤨🤨 https://t.co/dI6OdPKzUb	سال صددد تق جار یئل 74 تائف لے نکی مالبت 1 الاکددپگی کج ہس کے راک	Year 74 Taif Niki Malabat 1 Al-Akddpagi crooked Hiss Rock	Hate
1564599392782393346	لکھانی میں درد دل رکھنے والہ محمد آصف خان لکھانی چند دن پہلے لکھانی میں ایک بچہ رودکوہی کے پانی میں ڈوب کر وفات پا چکا ہے اس کے والد کا نام محمد اقبال ہے کل صبح 10 بجے جناب محمد آصف خان لکھانی نے اس بچے کے والد صاحب کو AC تونسہ سے 8 لاکھ کا چیک لے دیا.. https://t.co/Ny8naFNMA0	Painful in writing Muhammad Asif Khan Lakhani A few days ago, a child has drowned in the water of the river in Lakhani, his father's name is Muhammad Iqbal. Yesterday at 10 am, Mr. Muhammad Asif Khan Lakhani took a check of 8 lakhs from AC Taunsa to the father of this child.. https://t.co/Ny8naFNMA0	NIL	NIL	No_Hate
1579400480358531073	@james2bond007 @Hammad_Azhar مادرچود رنڈی کا پلا نسل https://t.co/Jomr1K81dU	@james2bond007 @Hammad_Azhar Madraschod Rundi's full generation https://t.co/Jomr1K81dU	مجھے اقتدار میں لانے والے یہی	This is what brought me to power	Hate
1578769439410921472	پی پی پی کے پی پرائمری اساتذہ کے تمام مطالبات کی مکمل حمایت کا اعلان اور معماران قوم پر تشدد اور لاٹھی چارج کی شدید الفاظ میں مذمت کرتی ہیں۔ مطالبات:(اصلاحات کے نام پر ماہانہ پنش میں کٹوتی نامنظور) (پرائمری اساتذہ کا بنیادی سکیل 15 اور ہیڈ ماسٹر کیلے سکیل 16 اور17) https://t.co/IVJ21IPyDA	PPP KP declares its full support for all the demands of primary teachers and strongly condemns the violence and lathi charge against the majamar nation. Demands: (rejection of monthly penalty in the name of reforms) (Basic Scale 15 for Primary Teachers and Scale 16 and 17 for Headmasters) https://t.co/IVJ21IPyDA	NIL	NIL	No_Hate
1595322058912702466	آل پاکستان ڈویژنل مسابقہ کامل حافظ القران الکریم مع التجوید( ہزارہ ڈویژن ) وفاق المدارس العربیہ ایبٹ آباد میں حضرت مولانا مفتی کفایت اللہ صاحب کی خصوصی شرکت @TheMuftiKifayat https://t.co/ildDOc3oYl	Special participation of Hazrat Maulana Mufti Kifayatullah Sahib in All Pakistan Divisional Competition Kamil Hafiz Al-Qur’an Al-Kareem with Al-Tajweed (Hazara Division). @TheMuftiKifayat https://t.co/ildDOc3oYl	NIL	NIL	No_Hate
1568122734126718978	تحریک انصاف کے ٹکٹ کی وجہ سے اِس بندے نے لیاری ، کراچی میں بلاول ذرداری کو ہرایا۔۔ جو پیپلز پارٹی کا سب سے مضبوط علاقہ ہے۔ این اے 246 لیاری کا ہیرا ۔😒 #IStandWithImranKhan https://t.co/uNtwTbTX6n	Due to Tehreek-e-Insaaf ticket, this man defeated Bilawal Zardari in Lyari, Karachi. Which is the strongest area of ​​the People's Party. NA 246 Diamond of Lyari.😒 #IStandWithImranKhan https://t.co/uNtwTbTX6n	NIL	NIL	No_Hate
1593049213117796352	میں سوچتا ہوں سعد حسین رضوی کبھی اسلامی جمہوریہ پاکستان کا وزیر اعظم بن پائے گا جن کا کل اثاثہ 3مرلے ہے پھر دل کہتا ہے وہ رب جو بلال کو امیہ بن خلف سے آزاد کروا کر سیدنا بلال حبشی کو کعبے کی چھت پہ چڑھا سکتا ہے وہ سعد حسین رضوی کو ایک عظیم سلطنت کا بادشاہ بھی بنا سکتا ہے https://t.co/Mk1aTwJ7X4	I think Saad Hussain Rizvi will ever become Prime Minister of Islamic Republic of Pakistan whose total assets are 3 Marla. Then the heart says that the Lord who can free Bilal from Umayya bin Khalaf and raise Sayedna Bilal Habshi to the roof of the Kaaba can also make Saad Hussain Rizvi the king of a great empire https://t.co/Mk1aTwJ7X4	NIL	NIL	No_Hate
1559091060118355968	سیکیورٹی فورسزکے نڈربہادرجوانوں نے تمپ میں دہشتگردوں کے خلاف کامیاب کارروائی،دوران کاروئی دہشتگردBLAکےایک سہولت کارکو گرفتارکرکے مزید تحقیقات شروع کردیاہے دہشتگرداپنے مذموم مقاصد کو حاصل کرنے کی کوشش میں سیکیورٹی فورسزکے جوانوں کے ہاتھوں نشانہ عبرت بن گئے #دہشتگردبلوچستان_کےدشمن https://t.co/0IWg8N2IYn	The intrepid soldiers of the security forces arrested a facilitator of terrorist BLA during the successful operation against the terrorists in Tamp and started further investigation. #DehashtGardBalochistan_KedEsman https://t.co/0IWg8N2IYn	NIL	NIL	No_Hate
1578858461819187201	برگر پیسٹری کلاس کو کچل دیا جائے گا #رانا_جی_تن_کے_رکھو https://t.co/73J3rQJ4lz	The burger pastry class will be crushed #Rana_ji_tan_ke_kho https://t.co/73J3rQJ4lz	NIL	NIL	Hate
1559284356153327617	لعنت تجھہ پر اور لعنت تیرے میاں صاحب پر اور لعنت مداری کے مداری پن پر اور لعنت ان چوتیوں پر جو تیرا چتیاپا خرید رہے ہیں😡 بہنچود کرپٹ لوہار خاندان 😡 https://t.co/9nCvPc4BuN https://t.co/ppIAo8GD4B	Curse you and curse your husband and curse the wickedness of Madari and curse those who are buying your chattyapa. Brother and sister corrupt Lohar family 😡 https://t.co/9nCvPc4BuN https://t.co/ppIAo8GD4B	NIL	NIL	Hate
1594196302438490112	@KhSaad_Rafique شریفو کے کارنامے ووٹ چوری آئین شکنی جعلسازی میڈیا خرید جج خرید لفافے دے الیکشن کمشنر خرید صحافیو کو قتل لندن فلیٹس نیب قوانین ختم کھربوں کی منی لانڈرنگ کرپشن سیلاب فنڈ چوری توشہ خانہ چوری اورنج ٹرین کرپشن آشیانہ ہاوسنگ پاکستان سے لیکر لندن تک جگہ جگہ کرپشن کا گند بکھرا ھواہے https://t.co/8Gbb0TQ9dP	@KhSaad_Rafique Sharifo's exploits Vote theft Violation of the constitution Forgery Media buying Judge Buy Give envelopes Election Commissioner Buy Killing journalists London Flats NAB rules are over Trillions in money laundering Corruption Flood fund theft Stolen box Orange Train Corruption Ashiana Housing From Pakistan to London, the smell of corruption has spread everywhere https://t.co/8Gbb0T…	NIL	NIL	Hate
1596195516567937024	گورنر ہاؤس پشاور : قائد جمعیت مولانا فضل الرحمٰن مدظلہ نماز جمعہ کا خطبہ دے رہے ہیں۔ https://t.co/4HvVIYEYRr	Governor House Peshawar: Leader of the Jamiat Maulana Fazlur Rehman Mudzilla is delivering the Friday prayer sermon. https://t.co/4HvVIYEYRr	NIL	NIL	No_Hate
1568929285473456128	@Shahzad_IQBALpk کنجر اور سور کی اولاد ہو اور مریم نواز فالو نہ کرتی ہو ایسا ہو نہیں سکتا۔ https://t.co/FQG2osL99z	@Shahzad_IQBALpk Can't be the offspring of a conger and a pig and Maryam Nawaz doesn't follow. https://t.co/FQG2osL99z	:۸۸ھ ۱۷۸۷۲۴۹2 30114 513۲۱۶ ۱۱۵۷۸۸2 ۱۷۸۵۲۱۷۲۱ چ ‎٥۷‏ اا۱) ا5اہ ھ - ‏چجلوناک‎ ٤1 [و٥ا‎ 1 0553 23١1_۱٥۱6۸۲]۴ مم بغیرت نہیں جو گانڈ کو وڑاویں اور ٹوش گانڑو مراد سیر کا اتقبال لی , بن )ا 18.۹ 6:37 ۳۱۸۰10/09/2022 ۰٢۷۱٣٤٥۴ ٥۴ ۸٥9	: 88H 17872492 30114 513216 1157882 178521721 57 A1) A5ah H - Chajlonak 41 [W5a 1 0553 2311_151682]4 It is not without reason that the ass should be kicked and the tosh should be kicked Welcome to the tour, Bin)a 18.9 6:37 3180 10/09/2022 02713454 54 859	Hate
1567918302898307073	السلام علیکم ورحمۃ اللہ ٹرانس جیڈر ایکٹ گھناؤنا اور خطرناک قانون ہے جس سے نہ صرف اسلام کے نام پر بنے ملک میں ہم جنس پرستی کو فروغ مل رہا ہے بلکہ یہ خلاف قدرت بھی ہے جس کی آڑ میں مرد خود کو عورت اور عورت خود کو مرد بناکر معاشرے میں بگاڑ کا سبب بن رہے ہیں https://t.co/Q7afFhonWk	Peace be upon you and may Allah have mercy on you The Transgender Act is a hideous and dangerous law that not only promotes homosexuality in a country built in the name of Islam, but is also against nature, under the guise of which men transform themselves into women and women transform themselves into men. Causing https://t.co/Q7afFhonWk	کوجماعت اسلا می کے اوت سینمیٹرمتاق امرخان صاصب نے اس ائیکٹ می تر می مکابل	Kujamaat-e-Islami K Oot Cmtr Taq Amrkhan Sasab did not fight this act	No_Hate
1567916563205955586	@OfficialDGISPR اگر کل نسیم شاہ نیوٹرل ہو جاتا اور کہتا میرا کام تو باولنگ کرنا ہے بیٹنگ نہیں میں کیوں مداخلت کروں ںبیٹنگ میں لیکن وہ ملک کی عزت کی خاطر نیوٹرل نہیں ہوا لڑا ایسا لڑا کہ تاریخ رقم کر دی ❣️✌️👎👎👌👌👌اس کچھ شرم کرو نیوٹرل صاحب https://t.co/L2wtVHnSlT	@OfficialDGISPR If yesterday Naseem Shah had become neutral and said my job is bowling not batting why should I interfere in batting? But he did not become neutral for the honor of the country, he fought in such a way that he made history.	NIL	NIL	Hate
1593613428509253633	کوشش کرو کہ کسی انسانی جان کو تم سے آرام پہنچے یا جو دست شکستہ ہے اس کو تمہارے ذریعہ روٹی ملے ـ قیامت کے بازار میں کسی سودے کی اتنی قیمت اور چلن نہ ہو گا جتنا دل کا خیال رکھنے اور دل خوش کرنے کا____ https://t.co/4eR6SZFFLv	Try that a human soul may find comfort from you or that a broken hand may find bread through you - no bargain in the market of the Day of Judgment will be worth as much as taking care of the heart and making the heart happy ____ https:/ /t.co/4eR6SZFFLv	NIL	NIL	No_Hate
1578057592697507841	کراچی /ملاقات لاشاری قبیلے کے اہم شخصیت سردار غلام مصطفیٰ خان لاشاری انکے فرزند سردارذادہ ذیشان خان لاشاری سے انکی رہائش گاہ پر جمعیت علماء اسلام جھل مگسی کے سینئر رہنماؤں مولانا عبدالحئی عارفی مولانا مہراللہ لاشاری مولانا ابو عکراش عبید کی ملاقات باہمی دلچسپی کے امور پر گفتگو https://t.co/vbkj2qvD3z	Karachi / meeting The important figure of Lashari clan, Sardar Ghulam Mustafa Khan Lashari, met with his son Sardarzada Zeeshan Khan Lashari at his residence. /t.co/vbkj2qvD3z	NIL	NIL	No_Hate
1579506614113275905	@Shihzadijui بندوق کی نالی کے سامنے کھڑا کر دو تب بھی چوروں کی وکالت نہیں چھوڑوں گا نا مہنگاٸ کے خلاف بولوں گا بس چھوٹی سی تمنا ہے چھوٹی سی آشا بس پارلیمنٹ پہنچا دو یہ ڈھاٸ من کا لاشہ لعنت اولسن https://t.co/OIjI22uzFY	@Shihzadijui I will not stop advocating for thieves even if put in front of a gun barrel I will speak against the pricelessness Just a little wish, a little hope Just deliver this dead body to the parliament Damn Olson https://t.co/OIjI22uzFY	NIL	NIL	Hate
1581324091700969472	@MashwaniAzhar پتا نہیں کیسے اتنی بکواس کر لیتے ہو شرم تو تم لوگوں کو چھو کر بھی نہیں گزری https://t.co/iLvqhKm1bU	@MashwaniAzhar I don't know how you come up with such nonsense Shame you people haven't even touched https://t.co/iLvqhKm1bU	3 ںلنا ۸۶ہ٥۷۸ا‏ ہ١۸۸‏ تہ 5نا ۱٥ا6‏ ٥إ‏ آشا“د”مہ' ڈمی وزیر اعظم تھاء اختیارات کسی اور کے پاس تھے , شروع میں اسٹیبلشمنٹ نے مدد کی آخری 3 ماہ ساتھ نہیں تھی: عمران خان کے انکشافات -۳۴/14. ‎٥٥٥٠٢۷۷٥١٠۴۹‏ ‏...0۰202213 ۲۲3٥5۱1816 ۷۲۴ 19:10 5+۰14 0) 22 ۰۴7	3 Nalana 86h578a h188 teh 5 Na 15 A 6 5 Asha "D" Mah' Dummy Prime Minister Tha Powers Someone Else had, initially by the establishment Last 3 months of help was not with: Imran Khan's revelations -34/14. 555027751049 ...00202213 2235511816 724 19:10 5+014 0) 22 047	Hate
1594122063857733632	#گھڑی_چور_شرم_کرو بھارت اور اسرائیل سے فنڈنگ ہوئی تھی تو کیا بھارت چاہے گا کہ پاکستان میں نئی یونیورسٹیاں تعمیر ہوں ؟ اسرائیل نے رقم دی کہ پاکستان میں دفاعی نظام مضبوط کرنا ؟ اپنے دشمن کو پہچان کر جئیں ، یہ غدار آج بھی پنجاب اور کے پی کے میں حکومت کر رہا ہے https://t.co/GTHEDw1O1y	#shame_on_the_watch_thief Funding came from India and Israel So does India want new universities to be built in Pakistan? Israel gave money to strengthen the defense system in Pakistan? Know your enemy, this traitor is still ruling in Punjab and KPK https://t.co/GTHEDw1O1y	"اگ کل گھڑک چوری کر شر جحہم گڑرے چر ک ‎٢‏ عرنل ہاں	"Steal the clock tomorrow Evil hell Gudre Chark 2 Arnal Yes	Hate
1587409813797044225	فوجی شدید جنگی دبائو کے باعث افغانستان سے واپسی پر خودکشی‘ پاگل پن اور بسا اوقات عام افراد پر فائرنگ کے مرتکب ہوئے ہیں #پاک_فوج_امن_کی_ضامن https://t.co/ilbq9KcEbI	Soldiers have committed suicide, insanity and sometimes firing on civilians after returning from Afghanistan due to severe war stress #Pak_Forge_Aman_Ki_Jaman https://t.co/ilbq9KcEbI	اگ فوع امن نکی ضامن ی1س 0 ماک کے قر یی تعلقات پاگ افو اج ہی کے صرہون 66 منت ہیں ۔	The guarantor of peace Y1s 0 Maq's relationship with the family has been destroyed 66 There are vows.	No_Hate
1592899699962679298	خوار و بیمار و خطا وار و گُنہ گار ہُوں مَیں رافع و نافع و شافع لقب آقا تیرا کس کا مُنہ تکیے کہاں جائیے کس سے کہیے تیرے ہی قدموں پہ مِٹ جائے یہ پالا تیرا صَلی اللَّہُ عَلیہ وآلہِ وَسلم امام احمد رضا خان بریلویؒ https://t.co/NJRXbcnS1X	I am poor, sick, guilty and sinful Rafi, Nafi, and Shafi, the title of your master Whose face should you go to whom? May it perish at your own feet Peace and blessings of God be upon him Imam Ahmad Raza Khan Barelvi https://t.co/NJRXbcnS1X	NIL	NIL	No_Hate
1593630629769486338	"جـس دن تمہیں خوبصـورت عـورت ســـے فرق پڑنا بند ہو جائـــے اُس دن سمجھ لینا تم محبت کے بارے گفتگو کرنـــے کــے قابل ہو گئـــے ہو.. https://t.co/dsp7bYOQzI	"The day you Stop discriminating against a beautiful woman, realize that day you will be able to talk about love.. https://t.co/dsp7bYOQzI	NIL	NIL	No_Hate
1573228385442189313	بہت جلد یہ عمرانڈو Nawaz Sharif سے بھی معافی مانگے گا ان شاءللّٰہ https://t.co/2oFXopit3v	Very soon this Imrando Nawaz Sharif I will also apologize Inshallah https://t.co/2oFXopit3v	NIL	NIL	Hate
1587741676990234625	ہمارا سب سے بڑا مسئلہ یہ ہے کہ انصاف نہیں ہے، چھوٹا چور چوری کر کے جیل میں اور بڑا ڈاکو جوتے پولیش کرتے کرتے آج پرائم منسٹر بن گیا ہے، عمران خان Link:https://t.co/fVcw4hTNOD #PublicNewsLive #PublicNews @PTIofficial #ImranKhan #حقیقی_آزادی_لانگ_مارچ https://t.co/oM36KbS4lq	Our biggest problem is that there is no justice, a small thief is in jail for stealing and a big robber has become the Prime Minister today while polishing his shoes, Imran Khan said. Link: https://t.co/fVcw4hTNOD #PublicNews #PublicNews @PTIofficial #ImranKhan #true_freedom_long_march https://t.co/oM36KbS4lq	NIL	NIL	Hate
1595035002567270402	#جامعہ_کشمیر ❣️ ایم ایس او جامعہ کشمیر میں آج سیشن 2022 تا 2023 کی تنظیم سازی مکمل کی گئی ہے۔۔ الحمدللہ برادرم حمید اللہ حنفی ناظم جامعہ کشمیر منتخب ہوے ہیں۔ تمام نومنتخب ذمہ داروں کومرکز کی طرف سے مبارکباد اور دعائیں اللّٰہ پاک استقامت نصیب فرماے۔آمین #MSOpak https://t.co/HGjQBgkZUk	#University_of_Kashmir ❣️ The organization of session 2022-2023 has been completed today in MSO Jamia Kashmir. Alhamdulillah My brother Hameedullah Hanafi has been elected as the Nazim of Jamia Kashmir. Congratulations to all the newly elected officials from the center and may Allah bless them with steadfastness. Amen #MSOpak https://t.co/HGjQBgkZUk	NIL	NIL	No_Hate
1598961052405727232	@ashirazeemgill بگوڑہ گنجا شریف https://t.co/yJNX2wB1fr	@ashirazeemgill Bagora Ganja Sharif https://t.co/yJNX2wB1fr	NIL	NIL	Hate
1563243354543992834	علامہ رب نواز حنفی صاحب کی نیوکراچی ٹاؤن کے زیر اہتمام مرکز اہلسنت کراچی کے باہر ریلیف کیمپ میں تشریف آوری ۔ https://t.co/HlbXJaNhK8	Allama Rab Nawaz Hanafi visited the relief camp organized by New Karachi Town outside the center of Ahlesunnat Karachi. https://t.co/HlbXJaNhK8	17 ۱ فک (ہ ا ‎٦‏ ‏٭) ‏رر ‏حث ‏: ِ 3+ کے زب راتا ا و ار 1 ےکک	17 1 Fick (H A 6 *) rrr Urge : 3+ K zab rata And 1 cup	No_Hate
1609034565154398208	عمران خان کا اتنا خوف ہے کہ ہرجگہ الیکشن سے بھاگ رہے ہیں اور الیکشن کروانا اسلئیے نہیں چاہتے کہ اگر دوبارہ اقتدار میں آیا تو ان سب 🦮🦮 کو الٹا لٹکا کے ہی چھوڑے گا https://t.co/NcajOLTXfQ	Imran Khan is so afraid that they are running away from elections everywhere and do not want to hold elections because if he comes back to power, he will leave all of them hanging upside down https://t.co/NcajOLTXfQ	NIL	NIL	Hate
1605250156580204544	بنوں میں تمام شدت پسند اور دو فوجی ہلاک، یرغمالی رہا کروا لیے گئے: خواجہ آصف #KPK #PakArmy #Pakistan https://t.co/AyP8MsH2to https://t.co/PHTBLRmGnI	All militants and two soldiers killed in Bannu, hostages released: Khawaja Asif #KPK #PakArmy #Pakistan https://t.co/AyP8MsH2to https://t.co/PHTBLRmGnI	NIL	NIL	No_Hate
1561454766512697344	@hajra7246 @waqas_amjaad وہ تمھارا کنجر ھبگوڑا لیڈر نہیں جو گرفتاری کے ڈر سے ہر کسی کی میت ڈبے میں پارسل ہوتا ہے تو منہ بند کر بندریا 🙉 https://t.co/YzSpjeKcpy	@hajra7246 @waqas_amjaad he is not your kangar habguda leader who is parceled in everyone's dead body for fear of arrest So shut up monkey 🙉 https://t.co/YzSpjeKcpy	0و ں۸ 22 0816 , ۸۱۷۸ ‎٥1:02‏ 8)۷ ٤ 4 ‏یں‎	0 and 8 22 0816, 8178 51:02 8) 7 4 4th	Hate
1564571300974166016	خود کو سوات کا محسن کہنے والے مراد ٹنل سپیڈ سوات کے سیلاب زدگان کی بدحالی اور بدتر حالات پر کیوں خاموش ہے اور کیوں سوات سے بھاگ کر کہی چھپ گیا ہے؟ طالبان کو بھتہ دیکر سوات کا سودا کرنے والے ان میر جعفر اور میر صادق گروپ اور انکی خاندان والوں پر پر اللہ تعالٰی اپنا قہر نازل فرماۓ۔ https://t.co/C3VIbD4x6x	Why is Murad Tunnel Speed, who calls himself the benefactor of Swat, silent on the plight and worse conditions of the flood victims of Swat and why has he run away from Swat and is hiding somewhere? May Allah Almighty send His wrath on these Mir Jafar and Mir Sadiq groups and their families who made the deal of Swat by paying ransom to the Taliban. https://t.co/C3VIbD4x6x	NIL	NIL	Hate
1593637713458171906	عمران خان کو گولی نہیں غم لگا ہے، عمران خان کا لانگ مارچ ورک فرام ہوم میں بدل گیا ہے، ان کی سیاست کی لنکا ڈوب چکی ہے، مریم اورنگزیب #APPUrdu https://t.co/eootieWsu1 https://t.co/0zEumufOJK	Imran Khan has not been hit by a bullet, Imran Khan's long march has turned into work from home, his politics has sunk, Maryam Aurangzeb #APPUrdu https://t.co/eootieWsu1 https://t.co/0zEumufOJK	NIL	NIL	No_Hate
1580905364975128576	ایک پاکیزہ محبت کے ساتھ😘 تیرا ساتھ چاہتا ہوں جنت تک ❤ #انپڑھ 🙂 https://t.co/dppCU9nnvB	With pure love I want to be with you till heaven #अनपद़ 🙂 https://t.co/dppCU9nnvB	NIL	NIL	No_Hate
1568537830690889728	ہمارے ملک کی پاک فوج کے خلاف سازش ہو رہی ہے۔ جنرل باجوا ملک کے اصل ہیرو ہیں۔ اب وقت ہے اپنے پاک فوج کے ساتھ شانہ بشانہ کھڑا ہونے کا۔ ہم جنرل باجوہ کے ساتھ ہی رہیں گے] #WeSaluteCOASBajwa https://t.co/lGYqPSmYtt	There is a conspiracy against the Pakistan Army of our country. General Bajwa is the real hero of the country. Now is the time to stand side by side with our Pakistan Army. We will remain with General Bajwa] #WeSaluteCOASBajwa https://t.co/lGYqPSmYtt	ہم ۱ ر ین ےق م کا باچے :وا ہے یس یل کے ےار موک ا سے اورنہ بی دعمکایادبےے چا سی ہے ہ افواج پاکستان وشن کسی بھی جرکم تکافوری جواب دی ےکوتیارہیں ۔ 0۵ 0):ا|1۷۸۷۱058	We 1 The father of Ryn Eqm is: Wa From the opportunity of Yassel And there is no need to forget the support of the Pakistan Army We are ready to answer any questions immediately. 05 0): A|17871058	No_Hate
1581641995478450176	صوبائی وزیر صحت تیمور جھگڑا اور نوشیروان برکی کی میڈیکل کالجز کے طلباء کے ساتھ تعلیمی معیار اور درپیش مسائل پر بات چیت مستقبل کے ڈاکٹروں کو ساز گار ماحول اور بین الاقوامی معیار کی میڈیکل تعلیم مہیاء کرنے کا عزم #KPHealth #KP360Updates https://t.co/XZjD7t1gPV	Provincial Health Minister Taimur Jhagra and Naushirwan Barki discussed with the students of the medical colleges on the quality of education and the problems faced by them. Committed to providing a conducive environment and international quality medical education to the future doctors #KPHealth #KP360Updates https://t.co/XZjD7t1gPV	ایل آر ایچ کے بورڈ آف گورنرز کے چئیرمین پروفیسر نوشیروان خان برکی کا ایل ار ایچ کا دورہ ں صحت کارڈ پر مفت علاج اور داخل مریضوں کو دوائیوں کی آسان ترسیل کے لیے بدایات جاری ٭ صوبائی وزیر صحت تیمور جھگڑا اور نوشیروان 0 برکی کی میڈیکل کالجز ُی کے طلباء کے ساتھ تعلیمی معیار اور درپیش مسائل پر بات چیت مستقبل کے ڈاکٹروں کو ساز گار ماحول اور بین الاقوامی معیارکی ۴ میڈیکل تعلیم مہیاء کرنے تادنع 6×9 ۲٢۰۵	LRH Board of Governors Chairman Prof Naushirwan Khan Barki's visit to LRH Free treatment and inpatients on health card Initiatives for easy delivery of medicines to Continued Provincial Health Minister Taimur Jhagra and Naushirwan 0 Birki Medical Colleges Educational with students of Standards and issues faced Discussion on Doctors of the future Friendly environment and International standard 4 T…	No_Hate
1606906126104428544	نوڈیرو میں گونج لہو کی سن لو اپنے کانوں سے خون ناحق چھپ نہیں سکتا مذہب کے دستانوں سے #DaughterOfTheEast https://t.co/B150xYtimz	Hear the echo in Nodero with your ears Blood cannot be unjustly hidden by the gloves of religion #DaughterOfTheEast https://t.co/B150xYtimz	NIL	NIL	No_Hate
1564208985707790344	یار آپ جو بھی ہو! جہاں سے بھی ہو۔ جو آپ کر رہے، اس نے زندگی کے زندگی ہونے پر ، انسان کے انسان ہونے پر یقین کو ایک نئی روح پھونک دی ہے! آپ کے ہاتھوں پر بوسہ! آپ کے ماتھے پر بوسہ! آپ کے سر پر بوسہ! آپ کے جذبوں پر بوسہ! 😊❣️💕💋💕❣️😊 https://t.co/4iEWQWBk3V	Dude whatever you are! From wherever. What you are doing has breathed a new life into the belief that life is life, that man is man! Kiss on your hands! Kiss on your forehead! Kiss on your head! Kiss on your passions! 😊❣️💕💋💕❣️😊 https://t.co/4iEWQWBk3V	NIL	NIL	No_Hate
1580108335776690180	جڑانوالہ میں منگنی ختم ہونے پر نوجوان نے منگیتر کو فائرنگ کرکے موت کی نیند سلا دیا اور پھر خود کو بھی گولی مار کر خودکشی کرلی۔ جڑانوالہ میں لاہور روڈ پر نوجوان منگنی ختم ہونے کا صدمہ برداشت نہ کرسکا اور انتہائی قدم اٹھاتے ہوئےاپنی منگیتر اور میٹرک کی طالبہ آمنہ کوقتل کردیااورپھر https://t.co/vw1cWiy4Lq	After the engagement ended in Jaranwala, the young man shot his fiancee to death and then committed suicide by shooting himself. On Lahore Road in Jaranwala, the young man could not bear the shock of the end of the engagement and took extreme steps to kill his fiancee and matriculation student Amina and then https://t.co/vw1cWiy4Lq	NIL	NIL	No_Hate
1587463568940736512	علی وزیر کے حلقے کے لوگ دو سالوں سے نمائندگی سے محروم ہیں جو سراسر ظلم ہے۔ عمران خان جس کی پختونخوا میں حکومت ہے اور لاہور میں حقیقی آزادی کیلئے مارچ کررہے ہیں نہ عمران اور اس کی پارٹی اس پر بولنے کو تیار ہے اور نہ وفاقی حکومت دلچسپی لے رہے ہیں #ReleaseAliWazir @Manzoor https://t.co/ewmmqAcim9	The people of Ali Wazir's constituency have been deprived of representation for two years, which is a complete injustice. Imran Khan who has the government in Pakhtunkhwa and is marching for real freedom in Lahore, neither Imran nor his party is ready to speak on it and neither the federal government is interested. #ReleaseAliWazir @Manzoor https://t.co/ewmmqAcim9	NIL	NIL	No_Hate
1565262054876913667	#میں تو سمجھا دو چار ہی ھونگے___!! ✌ #KHAN تیرے شہر کا تو ہر شخص منافق نکلا !! 🔥 https://t.co/3M9zyw9iBX	#I thought it would be two or four. ✌ #KHAN Everyone in your city turned out to be a hypocrite!! 🔥 https://t.co/3M9zyw9iBX	NIL	NIL	No_Hate
1579394011001155586	میاں صاحب کے ساتھ ہونے والے ظلم اور ذیادتی کی داستان سن کر آبدیدہ ہو گئی۔ سلیوٹ ہے میاں صاحب اور ان کی بہادر بیٹی مریم نواز کو جن کے حوصلے اتنے ظلم سہنے کے بعد بھی پست نہ ہوئے۔۔۔ حنا پرویز بٹ #HinaPervaiz #NawazSharif #MaryamNawazSharif https://t.co/ysnPDS35AC	After hearing the story of cruelty and abuse of Mian Sahib, he was shocked. Salute to Mian Sahib and his brave daughter Maryam Nawaz, whose morale did not drop even after suffering so much cruelty. Hina Parvez Butt #HinaPervaiz #NawazSharif #MaryamNawazSharif https://t.co/ysnPDS35AC	7 ہاں صاحب کے سا اھ ہو ے والے تلم اود ذیادل کی داتان گی رآہزیرہ ہو 7 ہلوٹ ے مال صاحب اور ان کی بہادر می ری وا زکو جن کے حوصلے امن شلم نے کے بعد بھی بت نہ ہوۓے	7 Yes sir, those who are like that are talam and ziyadal Ki dataan ge rahazira ho 7 hilot e mal sahib and His brave mi re wa zaku whose morale is peace Do not become idols even after Shalam	No_Hate
1578389036158304256	ایسی پھٹی ہے کہ رکنے کا نام ہی نہیں لے رہی۔ #پانچتومیںخریدرہا_ہوں @PTIofficial @ImranKhanPTI #ٹیریان_کا_حرامی_باپ https://t.co/0GJzFiau9A	It is such a rage that it is not taking the name of stopping. #I am buying five of you @PTIofficial @ImranKhanPTI #Terian_Ka_Harami_Baap https://t.co/0GJzFiau9A	اہ تر سے ج کے شا پک میرے سے بڑاسامتقدا نک یں مم رےعلادہکو یآ بیشن یں ا سک منوء فنڑنکبھ یڑ یکئی تدش خانرٹش چو رگ ا سک پلڑ کی ا سک پیر گے اتھوںپکڑیکئی اس کی ایک ایک مخافقت کھل کرسامنے آرشی شے	From Ah Ter to J. K. Shapak Don't be afraid of someone bigger than me Ask manoo finankabh yad yakii tadash khanritsh cho rag ask plar ki I will go there and catch it Each and every one of its contradictions is revealed in front of us	Hate
1561733638479290368	امیر جماعت اسلامی سراج الحق کا ڈیرہ غازی خان کا دورہ، سیلاب سے متاثرہ علاقوں میں امدادی سرگرمیوں کا جائزہ لیا، میڈیا سے گفتگو میں پی ٹی آئی اور پی ڈی ایم سے کچھ دنوں کےلیے سیاسی لڑائی روک کر تمام تر توجہ سیلاب زدہ علاقوں پر مرکوز کرنے کی اپیل کی #سراج_الحق_سیلاب_زدگان_کےساتھ https://t.co/gD0X5ssUxi	Amir Jamaat-e-Islami Sirajul Haq visited Dera Ghazi Khan, reviewed the relief activities in the flood affected areas, stopped the political fight with PTI and PDM for a few days while talking to the media and focused all attention on the flood affected areas. Appealed to do #Siraj_ul-Haq_Selab_Zadagan_with_https://t.co/gD0X5ssUxi	NIL	NIL	No_Hate
1591126350789648386	ایران کے شاہد 136 ڈرون کی رینج میں پورا اسرائیل ہے، صیہونی انٹیلی جنس https://t.co/waypq7ClD9 #Isreal #Iran #جمهوري_اسلامي https://t.co/8fhG1u8n9i	All of Israel is in range of Iran's Shahid 136 drones, Zionist intelligence https://t.co/waypq7ClD9 #Isreal #Iran #Islamic Republic https://t.co/8fhG1u8n9i	NIL	NIL	No_Hate
1593761350622191618	ایسٹیبلسمنٹ کو احساس ہوا اور آغاز تھپڑ سے، وہ بھی پی ایم ۃاؑس میں۔۔۔۔اچھا ہوا اب اسکے پچھواڑے کک لگا کر حکومت سے باہر پھینک دیں، قوم پر بڑا احسان ہو گا۔۔! https://t.co/FhfNNpL5ZM	The establishment realized and started slapping, that too in the PM. Now kick his ass and throw him out of government. There will be a great favor to the nation..! https://t.co/FhfNNpL5ZM	NIL	NIL	Hate
1566415658732195842	جیو نیوز کو نیا بھائی مبارک ہو 🖐 مبارک ہو ARY بھی نیوٹرل ہوگیا فل بوٹ چاٹنے میں مگن ہے ARY بہت جلد جیو اور سماء کی طرح اس قوم کے ہاتھوں روز ذلیل ہوگا @ARYNEWSOFFICIAL #boycottARY #امپوٹڈ_حکومت_نامنظور https://t.co/zXhXKDHGyJ	Congratulations to the new brother of Geo News 🖐 Congratulations ARY has also become neutral Full boot licking ARY is busy Live very soon and will be humiliated by this nation like Sama @ARYNEWSOFFICIAL #boycottARY #imputed_government_disapproved https://t.co/zXhXKDHGyJ	ھی گران عَان اور لواز ثریی سے بیگ ڈور رالیطو ںا سلہلے جار یءذر ال 213 : تیم اشرفیٹد ۔اہ لہ لچپاظ ۱ں عَان اور وازش ربق لفیف سے میک لے 0 تھے	Hey Gran Aan and Lawaz Suree From bag door rails Salhle jar Yazir al 213 : Team Ashrafitad. Ah Lah Lachpaz 1 was Aan and Wazash Rabq Lafif to Mak Lay 0	Hate
1609042263635628032	خوف عارضی ہے۔ ندامت ہمیشہ کے لیے ہے۔ https://t.co/n6WAYfKIbJ	Fear is temporary. Regret is forever. https://t.co/n6WAYfKIbJ	NIL	NIL	No_Hate
1578761606842187776	@Atifrauf79 "نیازی کو بھاگنے نہیں دینگے" کہنے والے سارے لندن نس گئے جے۔۔ اور کھوتے پٹواری آج بھی اسی وہم میں ہیں کے ساڈا کھوتا شیر اے https://t.co/dp875ieyHX	@Atifrauf79 All Londoners who said "we will not let the needy run away" are gone. And Khote Patwari is still under the same illusion, you are the only Khota lion https://t.co/dp875ieyHX	نے ے رانا شحاءالل اسلام آباد سے اب غیاب پلیں ١ 07 24116 ١ہ۰۸۷۸۰۸۰۷.۰7‎ 4۳۲۷۹٢ ۰٠.٣ 24.1۶۸0.۰۰۷۰ ]۴ 24۷۱۰۷۸۲۶٠۷	Rana Shahaullah from Islamabad now Bridges of absence 1 07 24116 1H08780807.07‎ 432792 00.3 24.1680.0070 ]4 24710782607	Hate
1593174272658526208	@PTIofficial چوری اور فراڈ کی رقم سے فلاحی کام ؟ تیرا سجود بھی حجاب تیرا قیام بھی حجاب سڑکوں کی تعمیر و مرمت حکومت کا کام ہے اور حکومت نیازی کی اپنی تھی نیازی کے دور حکومت میں گھڑی اس شخص تک کس طرح پہنچی اور اس سے حاصل ہونے والی رقم کہاں ہے ؟؟ https://t.co/7QSPYwV7V6	@PTIofficial Welfare work with stolen and fraudulent money? Your prostration is also a hijab, your stay is also a hijab Construction and repair of roads is the work of the government and the government was Niazi's own How did the watch reach this person during Niazi's regime and where is the money obtained from it?? https://t.co/7QSPYwV7V6	NIL	NIL	Hate
1580860666495131648	@tariqmateen اس ملک کی 75 سالہ تاریخ کا خلاصہ یہ ہے کہ اس ملک میں لڑائی بس اتنی ہے کہ چوکیدار کہتا ہے ہم کیش کاؤنٹر پر ہی بیٹھیں گے وزیراعظم کہتا ہے بندوق پکڑو اور باہر گیٹ پر پہرہ دو جو کہ انکو گوارا نہیں کیونکہ حکمرانی انکی برسوں کی عادت ھے اور گندی عادتیں کب بدلتی ھے #آخری_حل_فائنل_کال https://t.co/dHb2vi6Gi2	@tariqmateen The summary of the 75-year history of this country is that the fight in this country is only that the watchman says we will sit at the cash counter. It is a habit of years and when do bad habits change? #final_solution_final_call https://t.co/dHb2vi6Gi2	ز وک رج 7۷۷0۸۰۷۰/۷ رر	Zwick Ridge 77708070/7 Rrr	Hate
1578978586471460864	تمام مسلمان اسلام کو دل کی گہرائیوں سے جشن عید میلادالنبی صلی اللّٰہ علیہ وسلم مبارک ہو ۔ https://t.co/EUMgUHJrZm	Happy Eid Milad-ul-Nabi (peace and blessings of Allah be upon him) to all Muslims. https://t.co/EUMgUHJrZm	NIL	NIL	No_Hate
1579511366880473088	یہ حرامی بڑا خطرناک گیم کھیل رہا ھے۔۔یہ اصل میں مذہبی جنونیوں کو بڑھکا رہا ھے تاکہ کوٸی جاھل اٹھے اور عمران خان پہ حملہ کر دے۔۔ #مبشر_لقمان_اوقات_میں_رہو #RanaSanaullah https://t.co/Z0UlsDtqmu	This Harami is playing a very dangerous game. It is actually increasing the religious fanatics so that someone will rise up and attack Imran Khan. #Mobshir_Luqman_Oqat_Mein_Rho #RanaSanaullah https://t.co/Z0UlsDtqmu	ٰ ر۶ عمرالن ان اسسلا ہی ہر مہ پاکستا نکود بین ےدور سو راد ابر بناناچاورہاےء ٌ یں ہونےد 7ے	6 Imralan in assala hi har mah paksta nakud bin They wanted to build a hundred thousand clouds ٌ will be 7	Hate
1606627799308959745	بوڑھے ریٹائرڈ لوگوں کے ہاتھ پاکستان کو دے دیا ہے ۔ جنہوں نے یہ حال 👇 کردیا پاکستان کا۔۔۔۔ برباد کردیا پاکستان کو لہولہان کردیا پاکستان کو https://t.co/ey3VWryxqm	The hands of old retired people have been given to Pakistan. Those who made this situation of Pakistan. Ruined Pakistan Bloodshed Pakistan https://t.co/ey3VWryxqm	NIL	NIL	Hate
1568528751134228481	آج شام تمام پاکستان میں ملک کے سب سے مقبول لیڈر عمران خان کے ساتھ اظہار یکجہتی اور مائنس ون فارمولے کےخلاف اجتماع ہو گے- پاکستانی قوم سے اپیل ہے کہ بھرپور طریقے سے اجتماعات میں شرکت کر کے اس سازش کو ناکام بنائیں #MinusOneNaManzoor https://t.co/nOCpfSf1hJ	This evening, there will be a gathering in all of Pakistan to express solidarity with the most popular leader of the country, Imran Khan, and against the minus one formula. Pakistani people are requested to actively participate in the gatherings and thwart this conspiracy #MinusOneNaManzoor https://t.co/nOCpfSf1hJ	مہارے ہاتھ ہوں 1150311۸۷1:+11111 کنی اشنت 0 - ۸20600-۸۱	I have your hands 1150311871:+11111 Kani Ashant 0 - 820600-81	No_Hate
1574409544263794689	@MianNawaz_MNS آجاؤ جلدی جلدی ابو جی انتظار کر رہے ہیں https://t.co/AqLMg6BSk8	@MianNawaz_MNS come quickly Abuji is waiting https://t.co/AqLMg6BSk8	NIL	NIL	No_Hate
1565723043237969920	کرب و بلا کے دشت سے بازار شام تک https://t.co/4x9nP2viSM	From the Desert of Karb Wa Bala to Bazar Sham https://t.co/4x9nP2viSM	NIL	NIL	No_Hate
1565805497554542593	دو نمبر دھندے کی کمائی سے مکان بنانے والی رنڈیاں بھی عدالت کو قانون سمجھائیں گی 😁 @hinaparvezbutt @SaleemKhanSafi @MaryamNSharif @Marriyum_A https://t.co/Dk4wqxgLBE	The women who build houses by earning double digit money will also explain the law to the court 😁 @hinaparvezbutt @SaleemKhanSafi @MaryamNSharif @Marriyum_A https://t.co/Dk4wqxgLBE	NIL	NIL	Hate
1573598626106023936	@TahirMughalPml2 طاہر مغل نے اپنے ابو شوباز شریف سے ہی تھوک لگانا سیکھا ہی... یہ بھی اسی طرح زبان سے تھوک لگا لگا کر میاں سانپ کے ٹٹے مالش کرتا ہے... https://t.co/wI5EhHBw63	@TahirMughalPml2 Tahir Mughal learned how to spit from his Abu Shubaz Sharif... He also massages the legs of a snake by applying saliva with his tongue... https://t.co/wI5EhHBw63	NIL	NIL	Hate
1593865240135057409	@TahirMughalPml2 جب کہنے کو کچھ نہ ہو تو کیا "بکواس" کر کر کے ذلیل ہونا ضروری ہے۔۔ مگر لفافوں اور چمچوں کڑچھوں کو ان ذلالتوں اور اخلاقی قدروں کی ہلاکتوں سے کوئی فوق نہیں پڑتا https://t.co/OMsfKzYMXo	@TahirMughalPml2 Is it necessary to be humiliated by talking "nonsense" when you have nothing to say. But envelopes and spoons and spoons are not worth the humiliation and death of moral values ​​https://t.co/OMsfKzYMXo	NIL	NIL	Hate
1587432462703263745	@aliafzalsayal یہ شیطان خان پالتوں غلام اسکے کنٹینر پر کھڑے ہوکر موج مستی کرتے ہوئے دانت دیکھا رہا تھا آج تو پہلے کیوں اسکو یاد نہیں آئی ہمدردی ؟ یہ سب ڈرامے باز لوگ ہیں ساست چمکانے جاتے ہیں دنیا کو پتا ھے۔ https://t.co/3O4NS3Ole2	@aliafzalsayal This Shaitan Khan Paltan Ghulam was standing on his container and looking at his teeth today So why didn't he remember compassion first? The world knows that these are all dramatic people. https://t.co/3O4NS3Ole2	نحل زبراء ‎۵٥٣۱۶۳۲۱‏ ‏قربان جاوں اس مسکراہٹ کے ماشااللہ شیر !إ 86۰ك]۱ 568] حقیقی_آزادی_لانگ_مارچج6* ۲۲3051816 ٤۶ 16 * ‏جاممه(0ط عورووگ ی7‎ 3201 9 ۹ 8:37 8٥۰ 01 ١٣١۷ 22 ۰ ۲۷۷٣٤6٥٢ ٤٠٢ ۸۲11١۱٥۹	Nahal Zebra 55316321 Masha Allah lion of this smile! [860] [1 568] real_freedom_long_march6* 223051816 46 16 * Jammeh (3201 9 9). 8:37 850 01 1317 22 0 27734652 402 82111159	Hate
1558468018325389314	@raksh786 سب سے پہلے اس دلے کا والد پٹواری بنا تہا جب کوئٹہ بریف کیس لیکے جج خریدے نورے بگوڑے مفرو قیدی کے لئے 😁😂😂😂😂😂😂😂😂 https://t.co/PoL8dQTdLW	@raksh786 First of all, this heart's father became a patwari when the judge bought a light bag for an escaped prisoner with a briefcase in Quetta 😂😂😂😂😂😂😂😂😂 https://t.co/PoL8dQTdLW	NIL	NIL	Hate
1595644807296131072	یوکرین میں روس کے 70 میزائل حملے، 13 ہلاک - https://t.co/P4kG1EHgQZ https://t.co/5S5qecVvtl	70 Russian missile strikes in Ukraine, 13 killed - https://t.co/P4kG1EHgQZ https://t.co/5S5qecVvtl	NIL	NIL	No_Hate
1593863995798261760	ترک کہاوت ❗ اگر کسی شخص سے تعلق کاٹ چکے ہو تو اس کے متعلق اپنی زبان بھی کاٹ دو 📎 #ثمن_بلوچ ❤️ https://t.co/tQDUyXDt7q	Turkish Proverb ❗ If you have cut off your relationship with a person, cut off your tongue about him too 📎 #Thman_Baloch ❤️ https://t.co/tQDUyXDt7q	NIL	NIL	No_Hate
1567992283307606016	@UmarCheema1 یہ کمینے پاکستان بچائے گے https://t.co/HprdNFF7i0	@UmarCheema1 These bastards will save Pakistan https://t.co/HprdNFF7i0	NIL	NIL	Hate
1573661550853898242	#پختون_کلچر_ڈے کے موقع پر پختون بھائیوں سے اظہارِ یکجہتی۔ #سندھی #بلوچی #ہزارےوال #پنجابی #پٹھان سب بھائی بھائی ایک جان۔۔ https://t.co/lgtFWhPFJ6	Expressing solidarity with Pakhtun brothers on the occasion of #Pakhtun_Culture_Day. #Sindhi #Baluchi #Hazarewal #Punjabi #Pathan All brothers and sisters, one soul. https://t.co/lgtFWhPFJ6	NIL	NIL	No_Hate
1566724736968802305	تم اب اسکی سخت ضرورت ہے @BalochNadir5 جب تک معافی کا ٹویٹ نہیں کرے گا یا ثبوت نہیں دے گا تیری گانڈ کو لال کرتا رہوں گا اب تک بہت صبر کیا حرام زادا یوتھیا ڈی چوک کی پیداور شیعہ رافضی کتا 🖐🖐🖐🖐 https://t.co/sGj3Yn2Pyi https://t.co/ni5mjJWovI	You need it now @BalochNadir5 Until he tweets an apology or gives evidence, I will continue to make your ass red. Until now, I am very patient. Haramzada Yuthia de Chowk's Shia Rafizi dog. 🖐🖐🖐🖐 https://t.co/sGj3Yn2Pyi https://t.co/sGj3Yn2Pyi //t.co/ni5mjJWovI	NIL	NIL	Hate
1571735801477894151	میر صادق تیرا شکریہ (خسرا نیوز) https://t.co/8xlTd6VVeY	Thank you Mir Sadiq (Khusra News) https://t.co/8xlTd6VVeY	69 ھ 02:532 1 ۶3“ ۹۹۲۴ ےكػ- >ے نس رر 601۱۵۸۱۸۸۸۰۰۸ خسرا پرویز بٹ ٹرائس جینڈر بل پاس ھوتے ھی خوشی سے جھوم کر چوبرجی پہنچا اور فری میں دو گھنٹے ٹھمکے لگا لگا کر تھک هار کر چنگ چی والے کے ساتھ محمود بوٹی آ رام کرنے چلا گیا ۔۔۔۔کوئی تکلیف ؟؟ 7٥130۸9۱8٥6٤۴	69 AH 02:532 1 63 9924 Nerve 6011581888008 Khusra Parvez But Trias Gender Bill would have been passed He happily reached Choburji And two hours in Free Mehmood with Ching Chi Wale after giving up Boti went to relax. Any pain?? 7513089185644	Hate
1617575813787926537	میں صرف یہ کھونگا سر کہ فوج کے چند کردار جو ھر دور میں رھے ۔جنہوں نے یہ سارے کام کئے ۔لیکن عدلیہ کا کردار تو حالیہ مہینوں میں انتہائی گھناؤنا رہا ۔جونیازی جیسے فتنےکو تمام تر ثبوتوں کے باوجود چھوٹ دے رھی ھے ۔ https://t.co/gp65LQuC7p	I will only mention that some of the characters of the army who lived in every era, who did all these things, but the role of the judiciary has been very disgusting in recent months. https://t.co/gp65LQuC7p	3- ٦ ۸۷١٠ ۷۸١ہ ‏ں۷+لنا‎ ‎69۱60۱۸۷٥۸۷۶ ‏لا‎ ۴۳ موجودہ صورتحال کی ذمہ دار فوج اور عدلیہ ہیں, دونوں نے آئین اور قانون کے خلاف کام کیے: رانا تنویر ‎٥٥٥٥۲۷۷۰۲۷۴ ۰۵۴/23-(31-2023/13...‏ .۲٥305ا5۲6‎ ۲۸۴ 3 6ھ 23 ۸۸۸۰ 9:55	3-6 8710 781h 7+Lana 691601875876 La 43 Army responsible for the current situation And there is the judiciary, both the constitution and Acted against the law: Rana Tanveer 55552770274 054/23-(31-2023/13...) 25305-526 284 3 6H 23 8880 9:55	Hate
1573532792503386114	پاکستان کے لئے بڑا اعزاز۔۔ اقوام متحدہ میں تھُوک سے صفحہ بدلنے والا دنیا کا پہلا وزیراعظم۔۔🤗 اب یہی انگلی بندہ ان کو لانے والوں کے پچھواڑے میں ہی دے دے #ptiuaesmt #انصاف_ملنگی_فورس https://t.co/we2VRI50kd	A great honor for Pakistan. The first prime minister of the world to change the page with spit in the United Nations Now this finger should be given in the back of those who brought them #ptiuaesmt #Insaf_Malangi_Force https://t.co/we2VRI50kd	NIL	NIL	Hate
1567890774229979139	مریض ھوش میں آنے کے بعد ہاٹ اٹیک سے مر گیا۔ 🥹😂🤔 https://t.co/WTxhsLYUrQ	The patient died of heat attack after regaining consciousness. 🥹😂🤔 https://t.co/WTxhsLYUrQ	NIL	NIL	No_Hate
1563880133613817856	اگر کسی پے اعتبار کیا جا سکتا تو وہ ہے خان ، کیونکہ عمران خان کی ایک بات جو مجھے بے حد پسند ہے۔۔ نا کبھی سندھی کہا نا بلوچی نا پنجابی کہا نہ پختون کہا ، جب بھی کہا ۔۔میرے پاکستانیوں کہا.. 💖 https://t.co/8wOd4hwAYg	If anyone can be trusted, it is Khan. Because one thing of Imran Khan that I like very much. Never said Sindhi, nor Balochi, nor Punjabi, nor Pakhtun, whenever said. My Pakistanis said.	NIL	NIL	No_Hate
1560870035773702145	@mariyaaofficial #ناني_420 المعروف پاکستانی میاں خلیفہ کے قطری باشندوں سے تعلقات ثابت ہونے پر کیپٹن صفدر کو منہ دکھانے جوگا نہیں چھوڑا اب تو خاوند ہوتے ہوئے بھی یہ نہیں کہہ سکتے گا میری بیوی " مریم نواز باعزت قطر سے واپس آئے ہے " 🤗 https://t.co/RaRh17UsNP	@mariyaaofficial #Nani_420, known as Pakistani Mian Khalifa, did not stop to show his face to Captain Safdar when his relationship with Qataris was proved. Now even as a husband Can't say that My wife Maryam Nawaz has returned from Qatar. 🤗 https://t.co/RaRh17UsNP	NIL	NIL	Hate
1587744933703831552	اب تک اقوام متحدہ کے 41 امن مشنوں میں 154,527 پاکستانی فوجی حصہ لے چکے ہیں۔ ./ &lt;&gt; #پاک_فوج_امن_کی_ضامن https://t.co/1kfyL1lXEe	So far, 154,527 Pakistani soldiers have participated in 41 UN peacekeeping missions. ./ &lt;&gt; #Pak_Fuj_Aman_Ki_Jaman https://t.co/1kfyL1lXEe	جزل وٹ سومسیتت فلودد۔	Jazl vit somsitat fludad.	No_Hate
1587373170604081153	عمران نیازی اتنی تیری اقات نہیں جتنا تو بھونک چکا ہے اب بس 👊🏿 کان کھول کر سن لے پھدو نیازی تو چاہے 2000 کا جتھہ لے آ چاہے20000 ہزار کا تیری کوئی بات نہیں سنی جائے گی نہ فیس سیونگ ہو گی کیوں کہ تو ایک شیطانی چرخا ہے اور کچھ نہیں ۔👊🏿 @Atifrauf79 #NoFaceSavingForFitna https://t.co/4DHcSeInjE	Imran Niazi is not your respect as much as you have barked now 👊🏿 Open your ears and listen, Fadu Niazi, even if you bring a batch of 2000, even if you bring 20000 thousand, you will not be heard nor will there be any fee saving because you are a satanic wheel and nothing else.👊🏿 @Atifrauf79 #NoFaceSavingForFitna https://t.co/4DHcSeInjE	NIL	NIL	Hate
1580168990214627329	ذوالفقار علی بھٹو کو کس نے مارا ہے بے نظیر بھٹو کا قتل کا زمیندار کون ہے عمران خان کو کس نے کرسی سے اتارا ہے سوات کا امن کیوں خراب کیا جا رہا ہے پاکستان کے عوام جان چکی ہے پوری قوم حقیقی آزادی کے لیے تیار ہے عمران خان کال دو https://t.co/Xyn3efMxH6	Who has killed Zulfikar Ali Bhutto Who is the mastermind of Benazir Bhutto's murder Who has removed Imran Khan from the chair Why is the peace of Swat being disturbed The people of Pakistan have come to know that the whole nation is ready for real freedom Imran Call Khan https://t.co/Xyn3efMxH6	NIL	NIL	Hate
1561078119456440323	امیرغریب مڈل کلاس جوان بوڑھے ادھیڑ عمر پشتون پنجابی مہاجر شیعہ سنّی غیر مسلم مذہبی سیکولر معتدل لیفٹ رائٹ سینٹر لبرل کنزرویٹو سوشلسٹ ہر قسم کے لوگ عمران خان کے ساتھ ہیں اور خلاف بھی۔ پی ٹی آئی طبقاتی نسلی، لسانی مسلکی فکری نظریاتی یا سیاسی سپیکٹرم میں کوئی لکیر نہی https://t.co/ZQ4bFXi5Ct	Poor middle class Young, old, middle-aged Pashtun Punjabi Migrants Shia Sunni non-Muslim Religious secular moderate Left Right Center Liberal Conservative Socialist All kinds of people are with and against Imran Khan. PTI has no line in class, ethnic, linguistic, religious, ideological or political spectrum https://t.co/ZQ4bFXi5Ct	NIL	NIL	No_Hate
1608614924267433984	یہ بازی خون کی بازی ہے اور یہ خون کی بازی یہ ہیرونچی جیتے گا جس آلو کے پٹھے کو ہیروئین خریدنے کے لیے اپنا خون بیچنا پڑتا ہے 🤣 https://t.co/ffCcnk80vb https://t.co/EDWSn3geXx https://t.co/t2yxIpT0SN	This is a bloodbath and this bloodbath will be won by the heroinchi who has to sell his blood to buy heroin 🤣 https://t.co/ffCcnk80vb https://t.co/EDWSn3geXx https://t.co/t2yxIpT0SN	فی3 ایر لکوہوگا! پیسے واپس کرو	Per 3 years will be written! Return the money	Hate
1573129359447437312	کراچی گڈز کیرئیر ایسوسی ایشن کی تقریب حلف برداری ایڈمنسٹریٹر کراچی @murtazawahab1 کی تقریب میں مہمان خصوصی کے طور پر شرکت نور خان نیازی نے صدر ملک شیر خن نے اجرک اور ٹوپی پہنائی، ٹراسپورٹر بھائیوں کی خدمات کو خراج پیش کرتا ہوں، ملکر ہم اپنے شہر، صوبے اور ملک کی خدمت کرینگے https://t.co/lT24S9RuEN	Karachi Goods Carrier Association swearing in ceremony Administrator Karachi @murtazawahab1 attended the function as Chief Guest Noor Khan Niazi wears a badge and hat by President Malik Sher Khan, I pay tribute to the services of the transporter brothers, we will serve our city, province and country https://t.co/lT24S9RuEN	NIL	NIL	No_Hate
1562866706259013632	افغانستان کے چیف آف آرمی اسٹاف جنرل مبین خان اپنے ملک کے سیلاب سے متاثرین کے لئے اپنے ہاتھوں سے کھانا بناتے ہوئے ، یہ ہے حقیقی اسلامی ریاست اور انشااللّہ ترقی بھی خوب کرے گا۔ اگر ہمارے آرمی چیف کو آئینہ دکھایا جائے تو آپ کو ننگا کرکے پچھواڑے لال کئے جائیں گے ۔ زندہ باد https://t.co/vzOAqbUmo6	Chief of Army Staff of Afghanistan General Mubeen Khan cooking food with his own hands for the flood victims of his country, this is the real Islamic state and inshallah it will also develop well. If our army chief is shown a mirror, you will be exposed and your behind will be red. Long live https://t.co/vzOAqbUmo6	NIL	NIL	Hate
1581530410198392832	عورت جس کو متاثر کرنے کے لیے مہنگے کپڑے پہنتی ہیں اصل میں وہ اسے ننگا دیکھنا چاہتا ہے😻 https://t.co/WHahDqCBpF	A woman Who wears expensive clothes to impress Actually he wants to see her naked😻 https://t.co/WHahDqCBpF	NIL	NIL	Hate
1581940202234265600	زمین وآسمان دو جہانوں اورفرشتوں اور تمام مسلمانوں کی تمام لعنتوں کا صحیح حقدار عمران یھودی ایجنٹ ھے خنزیر کا بچہ #قاتل اعظم عمرانڈو یھودی https://t.co/cljfxwJu0N	Imran is a Jewish agent, a son of a pig, who has the rightful right to all the curses of the two worlds, the heavens and the earth, and the angels and all the Muslims. #Kathleen Azam Imrando Yehudi https://t.co/cljfxwJu0N	نیازی توجباں بھی جایۓگا _ شہذاکا فون فیراپیجشاکریںًٌا لبق نل _ا مم عمران ان	Niazi Tujban will also go. Shahzak's phone is on the page In the name of Imran	Hate
1567923450177622017	لالہ ھے بھئی لالہ ہے اچھا اچھا مال ہے https://t.co/ucSCJm2aPp	Lala hai bhai lala hai good good wealth https://t.co/ucSCJm2aPp	NIL	NIL	Hate
1617748748456824833	پاک فوج کی موثر کاروائیوں کی بدولت ملک سے دہشتگردی کے ناسور کا خاتمہ ممکن ہوا ہے اور امن بحال ہوا ہے #پاک_فوج_ہماری_ریڈ_لائن https://t.co/nxwzCXefIG	Thanks to the effective actions of the Pakistan Army, the scourge of terrorism has been eradicated from the country and peace has been restored #Pak_Forge_Our_Red_Line https://t.co/nxwzCXefIG	NIL	NIL	No_Hate
1593634570624290818	توشہ خانہ کی گھڑی سے صرف اوقات دکھائی گئی ہے۔ اصل کیس تو فارن فنڈنگ ہے #ڈھائی_ارب_کی_گھڑی https://t.co/cuV2eKXqhr	Only times are shown from the Tosha Khana clock. The real case is foreign funding #Dhaai_billion_key_hour https://t.co/cuV2eKXqhr	NIL	NIL	Hate
1608912076499746816	@SenatorMushtaq @KP_Police1 @GovernmentKP ایس ایس ایز ٹیچرز اور اسسٹنٹ ایجوکیشن آفیسرز کا احتجاج https://t.co/qe1oSFlv1d	@SenatorMushtaq @KP_Police1 @GovernmentKP Protest by SSS teachers and Assistant Education Officers https://t.co/qe1oSFlv1d	NIL	NIL	No_Hate
1558685685397209089	خدا کرے کہ میری ارض پاک پہ اترے۔ وہ فصل گل جسے اندیشہ زوال نہ ہو۔ قوم کو پچھترواں یوم آزادی مبارک. اللہ پاک پاکستان کی داخلی اور خارجی دشمنوں سے حفاظت فرمائے، اللہ پاک پاکستان کو ترقی کی راہ پر گامزن کرے اور تاقیامت ملکِ پاکستان کو امن و امان کے ساتھ قائم و دائم رکھے. آمین. https://t.co/TRAKWVwy9h	May God bless my land. The flower that is not afraid of falling. Happy Independence Day to the nation. May Allah protect Pakistan from internal and external enemies, may Allah guide Pakistan on the path of development and keep the country of Pakistan in peace and stability forever. Amen. https://t.co/TRAKWVwy9h	,. و سے یس۔ سید	,. And yes. Syed	No_Hate
1567386460034310145	کیپٹن ولی وزیرستان میں دہشتگردوں کی فائرنگ سے شہید ہوگئیے، کیپٹن ولی جیسے بہادر آفیسر کی وجہ سے ہم آرام سے سوتے ہیں، لویو کیپٹن ولی، قوم ہمیشہ آپ جیسے بہادر سپوتوں کے خون کی مقروض رہے گی، اللہ جی پاکستان کو مکمل امن کا گہوارہ بنادےآمین، https://t.co/syM0NufStQ	Captain Wali was martyred by terrorists firing in Waziristan. We sleep soundly because of such a gallant officer as Captain Wiley. Lowe Captain Wiley, The nation will always be indebted to the blood of brave sons like you. May Allah make Pakistan the cradle of complete peace Amen, https://t.co/syM0NufStQ	NIL	NIL	No_Hate
1565239029683339265	ان میں شرم ہوتی تو کبھی یہ دن نہ آتے خود کرپشن کر رہے ہیں ننگی عوام کو جھنڈا پہنا دیا ہے پیپلز پارٹی میں شرم نہیں https://t.co/WBYYIkXJK5	If they had shame, this day would never have come. They are doing corruption themselves. They have clothed the naked people with the flag. There is no shame in the People's Party https://t.co/WBYIIkXJK5	NIL	NIL	Hate
1609038301964410881	انڈیا میں پاکستان کی بلاک بسٹر فلم 'دی لیجنڈ آف مولا جٹ ' کی نمائش فوری طور پر منسوخ کر دی گئی ہے۔ پاکستان کی یہ ایکشن فلم دلی اور پنجاب میں 30 دسمیر کو ریلیز ہونے والی تھی۔ نمائش کی منسوخی کی کوئی وجہ نہیں بتائی گئی ہے۔ خبر رساں ادارے پی ٹی نے انڈیا کے https://t.co/7FEHgjzQE6 https://t.co/yyl1mAwKBd	The release of Pakistan's blockbuster film 'The Legend of Moolah Jat' in India has been canceled with immediate effect. This action movie of Pakistan was going to be released on 30th December in Delhi and Punjab. No reason has been given for the show's cancellation. PT news agency of India https://t.co/7FEHgjzQE6 https://t.co/yyl1mAwKBd	0۸/	08/	No_Hate
1614481079250948105	ارشادِ سَیِّدُنا خیثمہ رحمۃُ اللہِ تعالٰی علیہ:شیطان اس وقت تک انسان پر غالب نہیں آسکتا جب تک انسان یہ تین کام نہ کرے:(1)غیر کا مال ہتھیا لینا (2)غیر کا حق روک لینا اور (3)مال کو غیر حق میں خرچ کرنا (حلیۃ الاولیاء،ج4،ص126) https://t.co/VPTJj6Cm24	Sayyiduna Khaytma, may God bless him and grant him peace, said: Satan cannot overcome a person until he does these three things: (1) Grabbing the wealth of others, (2) Withholding the rights of others, and (3) Depriving others of their rights. to spend (Haliyah Al-Awaliya, Vol. 4, p. 126) https://t.co/VPTJj6Cm24	NIL	NIL	No_Hate
1567061867880660993	عمران خائن نے نومبر میں ہونے والی تعیناتی کے لئے دو جنرلز کو نامزد کر دیا ان کے علاوہ کسی تیسرے شخص کو عمران یہودی اور تحریک نا انصاف قبول نہیں کرے گی بصورت دیگر گھنگرو توڑ مجروں کے ذریعے ملک گیر احتجاج کیا جائے گا جوان لڑکیوں کے مجرے دیکھنے کے لئے عوام الناس کو دعوت عام ھے https://t.co/kKAS54CIIN	Imran Khain nominated two generals for the appointment in November, apart from them, no third person will be accepted by Imran Yehudi and Tehreek Na Insaaf, otherwise there will be a nationwide protest by young girls. The public is invited to view https://t.co/kKAS54CIIN	NIL	NIL	Hate
1592463733280112641	صوبائی وزیر کھیل و ثقافت عبدالخالق ہزارہ کو سیکرٹری کھیل محمد اسحاق جمالی تیسرا آل پاکستان وزیراعلی بلوچستان فٹبال گولڈ کپ اور دوسرا آل پاکستان وزیراعلی بلوچستان ہاکی گولڈ کپ کے البم پیش کر رہے ہیں ان کے ہمراہ ڈائریکٹر جنرل کھیل دُرا بلوچ بھی موجود ہیں @ij11127 @durradashti https://t.co/BrBZjEoaHA	Provincial Sports and Culture Minister Abdul Khaliq Hazara is presented with the albums of the third All Pakistan Chief Minister Balochistan Football Gold Cup and the second All Pakistan Chief Minister Balochistan Hockey Gold Cup by Secretary Sports Muhammad Ishaq Jamali along with Director General Sports Dura Baloch. @ij11127 @durradashti https://t.co/BrBZjEoaHA	NIL	NIL	No_Hate
1587735817300189184	@MaryamNSharif اللہ رحم فرما۔ اس قوم کی آنکھیں اور شعور کو کھول دے کے یہ فتنہ و فرقہ عمرانیہ کا پہچان سکیں۔ یہ ابھی صرف چلے ہیں اور 4 5 جانیں نگل چکے۔ عوام اس بے حس گھڑی چور درندے کے فسادی ایجنڈے سے دور رہیں۔ جو اپنی کرسی کی حوس میں کئی قیمتی جانوں اور ملک کی سالمیت کو داءو پر لگا رہا ہے۔🤔 https://t.co/Et6yLZA4zG	@MaryamNSharif May Allah have mercy on you. By opening the eyes and consciousness of this nation, they can recognize this sedition and sect. It has just moved and swallowed 4-5 lives. People stay away from the riotous agenda of this mindless clock thief beast. Who is putting many precious lives and the integrity of the country at stake in the lust of his chair.🤔 https://t.co/Et6yLZA4zG	NIL	NIL	Hate
1563371143230558210	@hinaparvezbutt ابھی تو پارٹی شروع ہوئی یے بندریا https://t.co/OxLwm8PnRy	@hinaparvezbutt the party has just started Bandaria https://t.co/OxLwm8PnRy	NIL	NIL	Hate
1564295060652544002	پاکستان آرمی اور ایف سی بلوچستان کوئٹہ، مسلم باغ، چمن، سوئی، مچھ، ڈیرہ بگٹی، سبی، لہڑی، نصیر آباد، بیلہ، اوتھل اور جعفر آباد کے علاقوں میں ریلیف کیمپس قائم کرکے پکا ہوا کھانا، اشیاءخوردونوش ،بستراور دیگر گھریلو اشیاءفراہم کر رہی ہیں۔ #ServingBalochistantogether #PakArmy https://t.co/FLAEKcU3OV	Pakistan Army and FC Balochistan have established relief camps in the areas of Quetta, Muslim Bagh, Chaman, Sui, Machh, Dera Bugti, Sibi, Lahri, Nasirabad, Bela, Othal and Jafarabad and provided cooked food, snacks, bedding and other household items. are doing #ServingBalochistantogether #PakArmy https://t.co/FLAEKcU3OV	NIL	NIL	No_Hate
1578384455718297600	ایک سیکس ورکر اجتماعی زیادتی کی رپورٹ لکھوانے گئی! انسپکٹر صاحب، وہ چار آدمی تھے۔ایک نے میرے سودے پکڑے، ایک نے منہہ میں، ایک نے ع غ کیا اور ایک سر تا پاوں تک چئیرمین نیب بنا رہا۔ انسپکٹر غصہ سے: ب چ، یہ تو ایف آی آر لکھوا رہی ہے یا کھڑا کروا رہی ہے۔ https://t.co/NXwxPmSgpR	A sex worker went to write a report of gang rape! Inspector sir, they were four men. One caught my deals, one was in the mouth, one was abducted and one remained the chairman of NAB from head to toe. Inspector angrily: Bitch, she is writing an FIR or making it stand. https://t.co/NXwxPmSgpR	٠٘5 . پور تی	05. Full	Hate
1593625430879240195	کوشش کرو کہ کسی انسانی جان کو تم سے آرام پہنچےـ یا جو دست شکستہ ہے اس کو تمہارے ذریعہ روٹی ملے ـ قیامت کے بازار میں کسی سودے کی اتنی قیمت اور چلن نہ ہو گا جتنا دل کا خیال رکھنے اور دل خوش کرنے کا !! ~خواجہ نظام الدینؒ اولیاٴ https://t.co/ACcB5QI4xN	Try so that a human soul can get relief from you - or the broken hand can get bread through you - in the market of Qiyaamat, no deal will be worth as much as taking care of the heart and making the heart happy!! ~ Khawaja Nizamuddin Auliya https://t.co/ACcB5QI4xN	NIL	NIL	No_Hate
1578021358004736001	😂😂😂😂 لعنتی شیدا ٹلی علیمہ باجی کے نقش قدم پر 🖐🖐 #رندا_تیار_ہے https://t.co/gcdYDUTYOj	😂😂😂😂 In the footsteps of the damned Sheeda Tilly Alima Baji 🖐🖐 #Rinda_Tiyar_Ha https://t.co/gcdYDUTYOj	NIL	NIL	Hate
1560455565490413569	سورج ہر ایک کو روشنی دیتا ہے وہ نہی دیکھتا کہ کون عیسائی ، کون ہندو اور کون یہودی ۔۔۔ خواجہ اجمیر (رح) فرماتے ہے کہ ولی میں سورج جیسی خاصیت ہوتی ہے_"°❤️ اللہ کا ولی نفرت نہی کرتا, ہر ایک سے محبت سے ملتا ہے.. کوئی, ہندو ہو,,سکھ ہو,, عیسائی ہو,,مسلمان ہو,وہ انسانیت کے لیے پیکر https://t.co/B0NhWZGw2U	The sun gives light to everyone, he does not see who is a Christian, who is a Hindu and who is a Jew. Khawaja Ajmer (RA) says that a saint has the same quality as the sun The guardian of Allah does not hate, he meets everyone with love. Be it Hindu, Sikh, Christian, Muslim, he is a figure for humanity https://t.co/B0NhWZGw2U	NIL	NIL	No_Hate
1559905667720396802	یکم ستمبر سے پیٹرول پر10 اور ڈیزل پر 5 روپے لیوی بڑھانے کا امکان۔۔۔۔۔۔ #BreakingNews #diesel #Petrol #Islamabad #IMF #10rs #inflation #Government #PmShahbazSharif https://t.co/O1yYYBhbDt	There is a possibility of increasing the levy on petrol by 10 rupees and on diesel by 5 rupees from September 1. #BreakingNews #diesel #Petrol #Islamabad #IMF #10rs #inflation #Government #PmShahbazSharif https://t.co/O1yYYBhbDt	NIL	NIL	No_Hate
1592553945083547649	@hinaparvezbutt یہ ڈھول والی مراثن https://t.co/szIxyt8FZQ	@hinaparvezbutt this drumming Marathas https://t.co/szIxyt8FZQ	NIL	NIL	Hate
1593569285267496961	#کہاتھا_بھاگنےنہیں_دینگے جب شیر کراچی آئے گا تو سارے گیدڑ بھاگ جائیں گے https://t.co/KID5TiFYQE	#Kahatha_Bhaganehneh_Denge When the lion comes to Karachi, all the jackals will run away https://t.co/KID5TiFYQE	NIL	NIL	No_Hate
1578053756746358793	Masha Allah بی بی بختاور بھٹو زرداری کو دوسرے بچے کی پیدائش پر بہت بہت مبارک باد۔ https://t.co/5rlepNUfF3	Masha Allah Congratulations to Bibi Bakhtawar Bhutto Zardari on the birth of her second child. https://t.co/5rlepNUfF3	NIL	NIL	No_Hate
1608860052928233472	کل ایک لڑکا ہاتھ دھو کر میرے پیچھے پڑا ہوا تھا🤦‍♀️🤷‍♀️ فر می نے منہ دھویا تب جا کے معاملہ رفع دفع ہوا🙆‍♀️🏃😕 😒🥱🤭🙄 https://t.co/lBDz44eqLU	Yesterday a boy washed his hands and was lying behind me After I washed my face, the matter was dismissed 😒🥱🤭🙄 https://t.co/lBDz44eqLU	NIL	NIL	No_Hate
1567043422476697600	جب اڑنا نہیں آتا تھا تو پنگا کیوں لیا انگلی کی تھی تو چپہ لیتے ہوئے چیخیں کیوں انگریز چلا گیا لیکن ایسٹ انڈیا کمپنی کے سامراجی ادارے اور وفادار کتے چھوڑ گیا #فوج_عدلیہ_انتظامیہ_پولیس_پارلیمان @OfficialDGISPR #بھاڑ_میں_جائے_آپ_کا_غصہ #اب_صرف_عمران_خان #DefenceDay https://t.co/p4ur53edlO	Why did you fly when you couldn't fly? If it was a finger, why are you shouting while hiding? The British left but left behind the imperial institutions and loyal dogs of the East India Company #Force_Judiciary_Administration_Police_Parliament @OfficialDGISPR #Bhar_Mein_Jay_Aap_Ka_Ghasa #Now_Only_Imran_Khan #DefenceDay https://t.co/p4ur53edlO	۵۰د ی۔_وم دفاع باکستان ٹیم پاک ایلفاپاکستان کے گمنام پیروز کو سلام پیش کرتے ہیں	50 d Defense Pakistan Team Pak salutes the anonymous heroes of Elfa Pakistan	Hate
1563490400513323008	' اسرائیل بھی ایک سیکیورٹی ریاست ہے جہاں سے حساس خبریں میڈیا کو ازخود فراہم کی جاتی ہیں' آصف شاہد کی مکمل تحریر پڑھیں https://t.co/RruFEklNIc https://t.co/O3y7zefB0w	"Israel is also a security state from which sensitive news is automatically provided to the media." Read the full article of Asif Shahid https://t.co/RruFEklNIc https://t.co/O3y7zefB0w	اسرائیلی بھاز وہا ںکیاکررہا تھا	What was the Israeli army doing there?	No_Hate
1561262873422217216	■قبائلی اضلاع باجوڑ, مہمند اور خیبر میں گذشتہ دو سالوں میں تیزی سے ترقی ◇ باجوڑ,مہمند,خیبر سے منسلک افغان بارڈر سے دہشت گردوں کوروکنےکیلئے فینسنگ, چھوٹے قلعے,پوسٹیں بھی قائم کی گئ ہیں منظم بارڈر مینیجمنٹ سسٹم کے تحت فینسنگ کی نگرانی بھی کی جا رہی ہے. #DevelopmentProjs_FCKPNorth https://t.co/i08DvieBr0	Rapid development in the tribal districts of Bajaur, Mohmand and Khyber in the last two years ◇ Fencing, small forts and posts have also been set up to deter terrorists from the Afghan border connected to Bajaur, Mehmand, Khyber and fencing is also being monitored under the organized border management system. #DevelopmentProjs_FCKPNorth https://t.co/i08DvieBr0	NIL	NIL	No_Hate
1598595197453193216	اعظم سواتی پر ظلم بند کیا جائے اور اوراس کو فوری طور پہ رہا کیا جائے کفر کا نظام تو چل سکتاہے مگر ظلم کا نظام نہیں چل سکتا https://t.co/lKETqmvy5M	The persecution of Azam Swati should be stopped and he should be released immediately The system of disbelief can work but the system of oppression cannot work https://t.co/lKETqmvy5M	NIL	NIL	No_Hate
1580140014888837121	امریکہ میں شوہر بیوی میں جھگڑا ہوگیا بیوی نے طلاق دی اور غوسے میں شوہر کے شکل پر ایک مجسمہ کیک بنایا اور پارٹی میں اپنی دوستوں کے ساتھ تکڑے تکڑے کیا نو موز خو در لہ وایو چی د خزو سرا چھیڑل مہ کوی ۔ ولاکہ یی ستا اغہ پلار ام پہ ضد اور دوشمنی کے را نہ وگٹی اسے زان مہ ستڑی کوا https://t.co/a91B91X970	In America, a husband and wife quarreled Wife divorced And in anger, she made a cake in the shape of her husband and broke into pieces with her friends at the party Now moz khu dar la vayo che de khazo sara chidral mah koi. But he did not give up on stubbornness and enmity towards his father and mother Check it out https://t.co/a91B91X970	NIL	NIL	No_Hate
1564943247742418951	تین ثکڑے کرنے کے صیہونی پلان میں عمران خان اکیلا نہیں ہے- ایک بڑے جج نے حکومت کو غداروں کے خلاف کاروائی کرنے پر متنبہ کیا- https://t.co/jJAmj9aaFK https://t.co/tSNBI86flS	Imran Khan is not alone in the Zionist plan to make three divisions. Senior judge warns govt to take action against traitors - https://t.co/jJAmj9aaFK https://t.co/tSNBI86flS	NIL	NIL	Hate
1559913468106530819	اس کتے کی ضمانت منظور ہوچکی ہے کس نے کہا کہ پاکستان میں قانون موجود ہے ؟؟ جس طرح بنگلہ دیش کے جج نے ریمارکس دیے تھے کہ یہ پاکستان نہیں ہے جہاں پر ملزم کو سزا نہیں ملے گی افسوس ہے ہمیں اس گندے بے ہودہ عدالتی نظام پر 🖐️🖐️ #faisalabadincident https://t.co/8CNWN9NT77 https://t.co/ZyjSfJxLBj	The bail of this dog has been approved. Who said that there is a law in Pakistan?? Just as the judge of Bangladesh had remarked that it is not Pakistan where the accused will not be punished We feel sorry for this dirty senseless judicial system 🖐️🖐️ #faisalabadincident https://t.co/8CNWN9NT77 https://t.co/ZyjSfJxLBj	NIL	NIL	Hate
1557934796369760258	جس عہد میں لٹ جائے خلقت کا جہاں اس عہد کے سلطان سے غداری ہوئی ہے https://t.co/7vV5CaikAO	In which era the place of creation hangs The sultan of this epoch has been betrayed https://t.co/7vV5CaikAO	NIL	NIL	No_Hate
1563457374303633408	پی ڈی ایم کے بے ضمیرحُکمرانوں کی اخلاقی درندگی سیلاب زدگان سے قرآن پر ہاتھ رکھوا کر ووٹ کا وعدہ لیا جا رہا پھر راشن فراہم کیا جا رہا ہے۔ #بےحس_حکمران_ڈوبتی_عوام @NaeemBukhariPTI @ImranKhanPTI https://t.co/dH38AWddCO	The moral brutality of PDM's unscrupulous rulers is taking the promise of vote from the flood victims by putting their hands on the Quran and then providing them with ration. #Insensitive_rulers_submerge_the_people @NaeemBukhariPTI @ImranKhanPTI https://t.co/dH38AWddCO	NIL	NIL	Hate
1614932691513921536	لطیف لالہ کا بہیمانہ قتل بلوچ و پشتون نسل کشی کا تسلسل ہے۔ قتل و قتال سے قومی حقوق کی موثر و توانا آوازوں کو دبانا مقصود ہے۔ لالہ پشتون قومی حقوق کے لیے ایک نہایت اہم و مؤثر آواز تھے ان کی بہیمانہ قتل کی بھر پور مذمت کرتے ہیں، اللہ تعالٰی ان کی روح کو دائمی سکون عطاء کرے۔ https://t.co/h5r40uPNKf	The brutal killing of Latif Lala is a continuation of Baloch and Pashtun genocide. Killings are intended to suppress the effective and powerful voices of national rights. Lala Pashtun was a very important and effective voice for national rights. We strongly condemn his brutal murder. May Allah grant his soul eternal peace. https://t.co/h5r40uPNKf	0 "۷و فطل : ھ8۲۰۰۵٠۰ ‏ےہ500860‎ ٤٥0:۶	0 "7 and Fatal: 8200500 500860 450:6	Hate
1578030259227664386	چیف الیکشن کمشنر بددیانت اور ناسور ہے،نیوٹرلز کے کہنے پر لگایا، اسمبلیوں میں واپسی ناممکن ،بشریٰ بی بی سے پتا چلا عوام نے میری برطرفی پر احتجاج کیا: عمران خان https://t.co/0HoMWB0jWQ https://t.co/nGnPhIN3e0	The Chief Election Commissioner is corrupt and corrupt, appointed at the behest of neutrals, it is impossible to return to the assemblies, it was found out from Bushra Bibi that the people protested my dismissal: Imran Khan https://t.co/0HoMWB0jWQ https://t. co/nGnPhIN3e0	NIL	NIL	Hate
1580895175143874561	چھوٹے چور جیلوں میں اور بڑے ڈاکو ایوانوں میں بیٹھے ہوں گے تو اس ملک کا کوئی مستقبل نہیں۔ عمران خان #ووٹ_مافیا_کیخلاف https://t.co/JMXy6QxlHK	If small thieves are sitting in jails and big robbers are sitting in houses, then this country has no future. Imran Khan #Vote_Mafia_against https://t.co/JMXy6QxlHK	NIL	NIL	Hate
1573047234291195906	جیو پاکستانی ❤ پشاور کے رہنے والے ایک پٹھان بھائی نے امریکہ کے مشہور جج Frank Caprio کو پشاوری ٹوپی پہنا دی 😍😍 #قومی_زبان https://t.co/6dskC9ShAV	Live Pakistani ❤ A Pathan Bhai resident of Peshawar put a Peshawari cap on the famous American judge Frank Caprio #National_Language https://t.co/6dskC9ShAV	NIL	NIL	No_Hate
1566370944905617413	سندھیو یہ ھے اصلی بھٹو.... جس زرداری کے بیٹے کو آپ بھٹو سمجھ رہے ھو وہ نقلی ھے.. سندھی بھائیو اصلی اور نقلی میں فرق جان کر جیو، ورنہ اسی طرح تم لوگ سیلاب میں سندھ کو اٹلی کا شہر وینس سمجھتے رہو گے https://t.co/COvY6vDL9G	Sindhiv is the real Bhutto.... Zardari's son whom you are considering as Bhutto is fake.. Sindhi brothers, live by knowing the difference between real and fake, otherwise you people will continue to think of Sindh as Venice in Italy https://t.co/COvY6vDL9G	NIL	NIL	Hate
1563270701527601155	@GovtofPakistan چور کو چوکیدار بناؤ پاگل ہو کیا 🙏🙏🙏🤣🤣🤣 https://t.co/VKw5YJp5OZ	@GovtofPakistan make a thief a watchman are you crazy 🙏🙏🙏🤣🤣🤣 https://t.co/VKw5YJp5OZ	1 لل٥٦60‎ 9138۷۵9 ۵٥ ۸11١	1 Lal 5660 9138759 55 8111	Hate
1581890341606547456	سارے اکیلے اکیلے خوار ہو رہے تھے پھر فضل الرحمن نے مشورہ دیا آو مل کر کھجل خوار ہوتے ہیں 🤣🙈😜 https://t.co/mhutSmL5f3	Everyone was getting lonely, then Fazlur Rehman suggested Let's get itchy together 🤣🙈😜 https://t.co/mhutSmL5f3	NIL	NIL	Hate
1581942708813582337	اللہ کرے تو زلیل خوار ہوکے مرے ظالم #خونی_درندہ_عمران_خان https://t.co/D4652AEChM	If Allah wills, he will die as a disgraced tyrant #Blood_Beast_Imran_Khan https://t.co/D4652AEChM	نیازی توجباں بھی جایۓگا _ شہذاکا فون فیراپیجشاکریںًٌا لبق نل _ا مم عمران ان	Niazi Tujban will also go. Shahzak's phone is on the page In the name of Imran	Hate
1560501530352033792	"نگاہ عیب گیری سےجودیکھااہل عالم کو. کوئی کافر، کوئی فاسق، کوئی زندیق اکبر تھا. مگر احتساب نفس پہ جب دل ہوا مائل. تو ہوا ثابت کہ ہر فرزند آدم ہم سے بہتر تھا" اقبال World is all about "be your self " and be "self accountable https://t.co/FwaAtxQ7kT	"He looked at the wise man from fault. Akbar was an unbeliever, a transgressor, a heretic. But when the heart was inclined towards accountability. So it was proved that every son of Adam was better than us." Iqbal World is all about "be your self" and be "self accountable" https://t.co/FwaAtxQ7kT	NIL	NIL	No_Hate
1568397224668807169	آداب عرض تمام ساتھیوں کو ایک بات سمجھ نہی آرہی یہ پنجابی رینجر نے لاکھوں قروڑوں مہاجروں کے قبلہ اول 90 کو اس لئے جلایا ہے کے سب کا دہان ہٹ جائے نصار پنہور بھائی کی گرفتاری سے مجھے یہ لگتا ہے ۔۔ #ReleaseNisarPanhwar #NineZeroBurnedDown @KahkashanHaide3 @AltafHussain_90 https://t.co/Y7pYb79KiC	Etiquette, all colleagues do not understand one thing, this is that the Punjabi Rangers have burnt the first 90 of millions of Mihajirs' Qiblah so that everyone's mouths will be shut off. #ReleaseNisarPanhwar #NineZeroBurnedDown @KahkashanHaide3 @AltafHussain_90 https://t.co/Y7pYb79KiC	NIL	NIL	Hate
1577582001556574209	میں سرجری کروا کر واپس آؤنگی تو پنجاب فتح کرونگی.مریم صفدر نانی کے اس بیان کے بعد سوچ رہا ہُوں کہ چار پانچ سرجریز اور کروا لیتی تو شائد بھارت فتح ہوجاتا اور چھٹی ساتویں کے بعد فلسطین کی آزادی صیہونی نہ روک پاتے. 😂 #نانی_پھر_بھاگ_گئ #فتنہ_عورت_جھوٹ_مت_بولو #TeachersDay2022 https://t.co/Ez11vfFDDo	If I come back after surgery, I will conquer Punjab. Maryam Safdar After Nani's statement, I am thinking that if four or five more surgeries were done, perhaps India would have won and the Zionists would not have been able to stop the freedom of Palestine after the sixth and seventh. 😂 #Nani_then_ran away #fitnah_woman_lie_don't_tell #TeachersDay2022 https://t.co/Ez11vfFDDo	NIL	NIL	Hate
1613145466895581185	بیٹا جتنی تیزی سے تم نے بہن چدوای ہے پاکستان کو تباہ کر دیا بہن چودو نے https://t.co/ZX9sejJVjF	Son, as fast as you have destroyed Pakistan, Sister Chudo https://t.co/ZX9sejJVjF	NIL	NIL	Hate
1565566915338244096	یہاں قاری قرار کر ہے کہ کمرے میں چار لوگ تھے اور وہ اکیلا۔ سنا ہے لہولہان چھوڑ کر چلے گئے تھے 😜😜 https://t.co/bmmhsu1KCn	Here the reader has stated that there were four people in the room and he was alone. Heard they left Laholhan 😜😜 https://t.co/bmmhsu1KCn	قومی کس جار لوگوں نے بن کھرے میں بے ناائل کروانے کا متصوبہ مناما ہے, خمران خان	Who is the national The people of Jar have made a lot of money The plan to do it is Manama, Khumran Khan	Hate
1578055406240387072	@hinaparvezbutt وزیراعظم صاحب پوری دنیا جانتی ہے کہ جھوٹا نواز شریف اور اسکا خاندان فراڈیا ہے۔۔۔کچھ پٹواری کو بھی جلد عقل آ جائے گی۔۔۔ https://t.co/8JMMFEzME6	@hinaparvezbutt, Prime Minister, the whole world knows that Nawaz Sharif and his family are liars. Some patwari will soon come to their senses. https://t.co/8JMMFEzME6	NIL	NIL	Hate
1579665911300386816	اس پر افسوس کے علاوہ کچھ نہیں کہ سکتے بلوچستان یونيورسٹيوں میں اسلام تھذیب اور بلوچی روایات کو روندڈالاگیاہے https://t.co/LtTqg3Q4dU	Can't say anything but sorry about it Islam and Balochi traditions have been trampled in Balochistan universities https://t.co/LtTqg3Q4dU	NIL	NIL	No_Hate
1614499910375571457	تاریخ مذاہب کے مطالعہ سے یہ بات ثابت ہوتی ہے کہ اسلام ہی وہ واحد مذہب ہے جو آزادیٔ نسواں یا حقوقِ نسواں کا حقیقی علمبردار ہے ۔ جس نے عورت کو ایک اعلیٰ و ارفع مقام عطا کیا۔ سلام ہے ان بھائیوں کو کہ اتنی شدید سردی کے تھپیڑے ہنسی خوشی خود برداشت کررہے اور خواتین کو سائبان عطا کیا ۔ https://t.co/yMBodYlDvS	The study of the history of religions proves that Islam is the only religion which is the true bearer of women's freedom or women's rights. Who gave the woman a high and prestigious position. Salutations to these brothers who cheerfully endured the harsh cold and gave shelter to the women. https://t.co/yMBodYlDvS	NIL	NIL	No_Hate
1578439659570372610	اگر یہی چیز کوئی بریلوی عالم کرتا نا یقین مانو چند لوگوں نے تو حد ہی کردینی تھی حق بولنا سیکھو بیشک حق بولنا ہر مومن کا حق ہے https://t.co/zcgiFDqEsM	If a Barelvi scholar would have done the same thing, believe me, few people would have done it Learn to speak the truth. Verily speaking the truth is the right of every believer https://t.co/zcgiFDqEsM	NIL	NIL	No_Hate
1574408084587679744	لانے اور بنانے والے چوتیے سالے 🖐🖐🖐 https://t.co/BitpHkhjFT	Bringing and creating fourth year 🖐🖐🖐 https://t.co/BitpHkhjFT	میں مفرور اشتہاری مجرم اسحاق ڈار وازیر خزانہ بنے گا۔ ایسے معجزے صرف پاکستان 3 میں دیکھنے کو ملتے ہیں۔ ‎٥‏	I am a fugitive advertising criminal Ishaq Dar will be Finance Minister. Such miracles only in Pakistan See you in 3. 5	Hate
1578789701007605760	ڈون اخبار میں کام کرتی رہتی عزت رہتی! 🖐🏾 اب ذلیل ہوتی رہو https://t.co/HfIB6xq8wD https://t.co/O83e29S1Hh	Don worked in the newspaper and continued to be honored! 🖐🏾 keep humiliating now https://t.co/HfIB6xq8wD https://t.co/O83e29S1Hh	ایک شوہ رکا نام ساتھ لانا پپند نمی ںکرکی دوسرا باپ کا نام ساتھ لگانا پیند نی ںک رتا اور ہے جوڑی لک پپاے گل ري ے۔	Bringing the name of a Shoh Raka with the Papand Nami Karki Second, adding the father's name was not recommended And there is Jodi Lak Pappaye Gul Re.	Hate
1615668216453275648	افواج پاکستان ہمارا فخر ہے #PakArmy #PakArmyZindabad #PakistanIsAStrongNation https://t.co/3tW3NRLgv2	Pakistan forces are our pride #PakArmy #PakArmyZindabad #PakistanIsAStrongNation https://t.co/3tW3NRLgv2	٢ص‏ 22 ھ2 رو مھ جا ین گے ا ارشش دن نین زور ہا فاتک۶ ور ےوک	2 p. 22 h2 I will die in a few days Zor ha fatak6 var yok	No_Hate
1573227330071588864	#آپریشن_رجیم_چینج کی وجوہات سامنے آرہی ہیں اسراٸیل کو تسلیم کرنے میں سب سے بڑیرکاوٹ عمران خان تھا جسکو بیرونی سازش کے تحت ہٹایا گیا #وہ_کون_تھا جسے ساٸفر بھیجا گیا اور جس نے سندھ ہاٶس میں منڈیاں لگواٸیں جس کے لٸے زرداری نے کھلے عام کہا سیاست آپ سنبھالیں خان کو ہم سنبھالیں گے https://t.co/xDW5cWNUeQ	#operation_mode_change The reasons are emerging. The biggest obstacle in recognizing Israel was Imran Khan, who was removed as part of a foreign conspiracy. #Who_was_that_ The one who was sent a cipher and who set up markets in Sindh House, for which Zardari openly said that you will handle politics, we will handle Khan https://t.co/xDW5cWNUeQ	NIL	NIL	Hate
1581510605445664770	عمران اپنے ہی ملک پر حملہ آور شرم نام کی کوئی چیز ہے: مریم نواز https://t.co/2VV1wHgkYo #PMLN @MaryamNSharif #PTI #Imrankhan #Pakistan #NewsPaper https://t.co/9Vp0EQ3Zcb	Imran is a shame attacking his own country: Maryam Nawaz https://t.co/2VV1wHgkYo #PMLN @MaryamNSharif #PTI #Imrankhan #Pakistan #NewsPaper https://t.co/9Vp0EQ3Zcb	NIL	NIL	Hate
1616760381652828160	جناب شوکت علی یوسفزئی کمشنر ہزارہ نے مورخہ 2023-01-20 کو ضلع توغر کو دورہ کیا ۔ تورغر آمد پر ڈپٹی کمشنر اور ڈسٹرکٹ پولیس آفیسر نے کمشنر ہزارہ کا پرتپاک استقبال کیا۔ اس موقع پر کمشنر ہزارہ ڈویژن کو تورغر پولیس کے چاق و چوبند دستے نے سلامی پیش کی۔ https://t.co/aYAFBBhdWv	Mr. Shaukat Ali Yousafzai Commissioner Hazara visited Toghar district on 20-01-2023. Deputy Commissioner and District Police Officer gave a warm welcome to Commissioner Hazara on his arrival at Torghar. On this occasion, Torghar police gave a salutation to Commissioner Hazara Division. https://t.co/aYAFBBhdWv	NIL	NIL	No_Hate
1617737755584524290	السلام علیکم ورحمۃ اللہ تعالٰی وبرکاتہ گرم بسترکوچھوڑکر نماز نہیں پڑھ پاتے نماز چھوڑتے وقت یہ سوچنا چاہیے اگر آج مر جائیں تو گرم بستر سے نکال کر ٹھنڈی یخ زمین میں دفنا دئے جائیں گے، باریک چادر (کفن) میں تن تنہا😭🙏 اللہ پاک! ہم سب کو حضرت محمدﷺ کی اطاعت فرمانبرداری نصیب کرے آمین https://t.co/DEcOZVkgos	Peace be upon you and may God bless you Can't pray without leaving a warm bed While leaving the prayer, one should think that if they die today, they will be taken out of the warm bed and buried in the cold ground, alone in a thin shroud (shroud) 😭🙏 God bless! May we all be blessed with obedience to Prophet Muhammad (peace be upon him) Amen https://t.co/DEcOZVkgos	کی خی5010 ار 10 08082727"تبجَ ‎٤‏ ‏تک کٴک ال کی طرف سے اعت کا فرش مترر ۱ ۱ ہد جاے گا اود شحیطان قرب گن ا کے گا	5010 Ar 10 08082727 "Tabj 4." 1. Floor of Ait by Tak Kuk Al 1 Hud will go and martyrs will count	No_Hate
1563825980870909953	پشتون علاقوں میں موبائل کا سروس بحال کیا جائے حکومت نے پشتون علاقے کا سگنل جان بوجھ کر بند کیا گیا ہیں تاکہ لوگوں کو حکومت کے نااہلی کا پتہ نہ چل جائے یہاں پر انسانی جانوں کا بہت زیادہ خطرہ ہیں حکومت وقت سے اپیل ہیں کہ سگنل جلد از جلد بحال کیا جائے۔ #dukinewz https://t.co/3Z60Jotcv7	Mobile service should be restored in Pashtun areas The government has deliberately shut down the signal of the Pashtun area so that people do not know the incompetence of the government. There is a high risk of human lives here. #dukinewz https://t.co/3Z60Jotcv7	NIL	NIL	Hate
1566433079039754241	@TararAttaullah ماں صدقے اس تہذیب والے پہ جو ایوان میں کھڑے ہو کے باعزت اشارے بنا رہا تھا۔ لعنت تمھاری منافقت پہ۔ کسی کتی ماں کی اولاد۔ اس والی تہذیب کا کیا کرنا ہے؟ لعنتی۔ سور https://t.co/t75F5b5kED	@TararAttaullah Mother charity for the cultured person who was standing in the House and making respectful gestures. Curse your hypocrisy. Offspring of a mother dog. What to do with this culture? cursed Pig https://t.co/t75F5b5kED	NIL	NIL	Hate
1567058014040899584	کرم پولیس کا امن وامان کی صورتحال کو برقرار رکھنے کے لئے ٹل سکاوٹس 152 ونگ کے ساتھ مشترکہ سرچ آپریشن سماج دشمن عناصرکے خلاف کیا گیا. سرچ اینڈ سٹرائیک آپریشن کا مقصد معاشرے میں امن و امان قائم رکھنا اور جرائم پیشہ افراد اور ملک دشمن عناصر کا خاتمہ کرنا ہے. https://t.co/bOp53ot535	In order to maintain law and order situation, a joint search operation with Tal Scouts 152 Wing was conducted against the anti-social elements. The purpose of the search and strike operation is to maintain peace and order in the society and eliminate criminals and anti-national elements. https://t.co/bOp53ot535	NIL	NIL	No_Hate
1562349080315052032	@update_im باؤلا کتا تو لندن میں بیٹھا فوج پر بھونک رہا ہے https://t.co/2eJObGHYfr	@update_im Bowla the dog is sitting in London barking at the army https://t.co/2eJObGHYfr	NIL	NIL	Hate
1614488709621075969	حقیقی آزادی آج صرف #بلے_پہ_ٹھپہ https://t.co/p24j9TeXRE	True freedom today only #बले_पहा_थपै https://t.co/p24j9TeXRE	کراچی کی واحد بڑی جماعت .- پاکستان تحریک انصاف ۔_ے 7 کب ںہ شر ران خالن کے نا ھزدکردہ امیدوارا نکرایتیقکی خشت کے لے تیار-	The only major party in Karachi Pakistan Tehreek-e-Insaf 7 When is evil? Ran Khalan's undisputed candidate is ready for the wrath of Nakritiq.	No_Hate
1566454587233652737	یہ جگہ خالی ہے کیا یہاں ہم اپنا مجرا کر سکتے ہیں حنا 🐐 غرہدہ بارودی اسپانسر ثناء بچھڑا https://t.co/pclhzny6aS	This place is empty Hina 🐐 Gharhida Barodi Sponsor Sana Bachcha https://t.co/pclhzny6aS	NIL	NIL	Hate
1571110529535713284	سردار حافظ منیب احمد رفیق ڈوگر ایڈوکیٹ ٹکٹ ہولڈر تحریک لبیک پاکستان pp177قصور گاؤں ٹھٹھی عثمان کا وزٹ کیا دوستوں اور بزرگوں سے ملاقات کی https://t.co/Bbj4OsDZRM	Sardar Hafiz Muneeb Ahmed Rafiq Dogar Advocate Ticket Holder Tehreek-e-Labaik Pakistan pp177 Kasur Visited village Thatthi Osman, met friends and elders https://t.co/Bbj4OsDZRM	NIL	NIL	No_Hate
1558109321988153344	@dasti014 @Rakiti313 @MoulanaOfficial ڈیزل مریم نواز کو سیلوٹ کرتے ھوئے. جمعیت ڈیزل. اسلام پسند ھے غیرشرعی کام نہی کرتی https://t.co/AbajwbiaUr	@dasti014 @Rakiti313 @MoulanaOfficial Diesel saluting Maryam Nawaz. Cumulative diesel. Islamic does not do illegal things https://t.co/AbajwbiaUr	NIL	NIL	Hate
1560152269013880833	@AftabIqbal_9 بالکل۔۔امریکی کتا ہے۔۔نیازی شیطان سمیت https://t.co/Bj60hiEoQ8	@AftabIqbal_9 of course..is an American dog..including Neazi Satan https://t.co/Bj60hiEoQ8	NIL	NIL	Hate
1593092940351811586	نائیجیریا:مسلح افراد کا گاؤں پر حملہ، 12افراد ہلاک مزیدتفصیلات: https://t.co/itYl3JuofS https://t.co/c4HMMzckgh	Nigeria: Gunmen attack village, 12 people killed More details: https://t.co/itYl3JuofS https://t.co/c4HMMzckgh	NIL	NIL	No_Hate
1568126577157750785	عمران خان کی کامیابی کی رپورٹ پر حکومت نے ضمنی الیکشن ملتوی کر دیئے۔ پاکستان کپتان کا #گنجےشیطان_کوتھپڑ_پڑا https://t.co/N8zgj3F0IM	On the report of Imran Khan's success, the government postponed the by-elections. Pakistan captain's #BaldShaitan_falls_down https://t.co/N8zgj3F0IM	NIL	NIL	No_Hate
1596183558007451648	کوہلی کو لاہور یا کراچی میں کون نہیں دیکھنا چاہتا؟ شاہین , بابر کو کولکتہ، ممبئی یا دہلی میں کون نہیں دیکھنا چاہتا؟ پاکستان کو بھارت کی میزبانی کرنے یا وہاں جانے سے کوئی مسئلہ نہیں ہو گا، امن قائم ہو اور کرکٹ ہو! آخر میں، سچے فینز کو ہمیشہ تکلیف ہوتی ہے۔ بس یہ یاد رکھیں 😔 https://t.co/PKem8nrgJp	Who doesn't want to see Kohli in Lahore or Karachi? Who doesn't want to see Shaheen, Babar in Kolkata, Mumbai or Delhi? Pakistan will have no problem hosting India or going there, peace and cricket! In the end, true fans always suffer. Just remember this 😔 https://t.co/PKem8nrgJp	NIL	NIL	No_Hate
1567067122362195968	آج ہمارے دھرنے کو اڑتالیس دن پورے ہوگئے ہیں اور کیمپ میں موجود ہم سب بیماری کی حالت میں احتجاج پر بیٹھے ہیں ۔ حکمران اپوزیشن اس وقت ہماری نظروں میں ایک جیسے ہی ہیں عملا ہمارے ساتھ کوئی نہیں ہے ہمارے پیارے ازیت گاہوں میں ہیں انھیں بازیاب کریں @CMShehbaz #ReleaseAbdulHameedZehri https://t.co/Aar1sqNFJd	Today forty-eight days of our sit-in have been completed and all of us in the camp are sitting on protest in a state of illness. The ruling opposition is the same in our eyes at the moment, the cadres are not with us, our loved ones are in Azit Gahs, bring them back @CMShehbaz #ReleaseAbdulHameedZehri https://t.co/Aar1sqNFJd	NIL	NIL	Hate
1581320746940485634	جوبائیڈن کی شمالی کیرولینا کے رالے میں فائرنگ واقعے کی مذمت جوبائیڈن نے ایک بیان میں کہا کہ بہت ہو گیا ۔ ہم بہت سارے خاندانوں کے غم میں شریک ہوئے ہیں جنہیں اس بڑے پیمانے پر فائرنگ واقعے کا بوجھ اٹھانا پڑا ہے۔ https://t.co/B2L3m6H10g	Joe Biden Condemns Raleigh, North Carolina Shooting Joe Biden said in a statement that enough is enough. We share the grief of the many families who have had to bear the burden of this mass shooting. https://t.co/B2L3m6H10g	٤ ٛ ١ ۸)3 08	٤ ٛ ١ 8)3 08	No_Hate
1593645830602625024	بلوچستان میں سکیورٹی فورسز کا آپریشن، دو دہشتگرد جہنم واصل #Ispr #Pakistan #Balochistan #army https://t.co/ISlHxiHnKB https://t.co/yk5Gpr0MYV	Security forces operation in Balochistan, two terrorists killed #Ispr #Pakistan #Balochistan #army https://t.co/ISlHxiHnKB https://t.co/yk5Gpr0MYV	NIL	NIL	No_Hate
1563833028119613440	ہاٸی لیول الرٹ🚨🚨🚨 دریاٸے کابل میں پانی کی سطح 337000کیوسک سے تجاوز,پانی کی سطح مزید بڑھنے کا خدشہ پشتون گڑھی,نوشہرہ کلاں پیر سباق,امانگڑھ اوردریاٸے کابل سے دیگر ملحقہ علاقہ جات کے لوگ گھر خالی کراٸیں۔ #FloodsInPakistan #PakistanFloods #NowsheraFlood 🫤 https://t.co/ii6eJvFJFz	High level alert 🚨🚨🚨 The water level in the Kabul river has exceeded 337000 cusecs, the water level is expected to rise further, the people of Pashtun Garhi, Nowshera Kalan Peer Saak, Amangarh and other areas adjacent to the Kabul river have evacuated their homes. #FloodsInPakistan #PakistanFloods #NowsheraFlood 🫤 https://t.co/ii6eJvFJFz	NIL	NIL	No_Hate
1573219555673264128	مجھ کو اس سے کیا مطلب ہے عاشق سچے ہوں یا جھوٹے میرے پھول تو بک جاتے ہیں۔۔🙂 https://t.co/KqWQXpkLzV	What do I mean by that? Whether the lover is true or false, my flowers are sold.. 🙂 https://t.co/KqWQXpkLzV	NIL	NIL	No_Hate
1564204799574560769	تیمور جھگڑا کے خط میں اعتراض والی بات کیا ہے۔اسد عمر https://t.co/DbDgLAZLqu https://t.co/V0u2e7HzXl	What is objectionable in the letter of Taimur Jhagra. Asad Umar https://t.co/DbDgLAZLqu https://t.co/V0u2e7HzXl	NIL	NIL	No_Hate
1578765412082528256	دریائے چناب کے کنارے ۔ بٹیروں کے شکار سے تواضع ۔ انتہائی لذیز ڈش ۔ خصوصی شکریہ برادرم خاور خان بلوچ @khawar129 https://t.co/7sZpIl7ZXY	On the banks of river Chenab. Humility from hunting quails. Very tasty dish. Special thanks to my brother Khawar Khan Baloch @khawar129 https://t.co/7sZpIl7ZXY	NIL	NIL	No_Hate
1596894367247405058	اگر کوئی پوچھے زندگی کیا ہے ہاتھ پہ رکھ کے اک شمع جلا دینا @Ziddigirl76 https://t.co/6kMj19O5vx	If someone asks what is life? Keep a candle on your hand and light it @Ziddigirl76 https://t.co/6kMj19O5vx	NIL	NIL	No_Hate
1578731580360519680	@HassanAyub82 ٹیوٹرل ام حریم صاحب یہ واپس ا رہا ہے اپ اپنی خیر مناۓ جو کچھ لوٹا ہے اور اشتہاری بھگوڑے اور کی جعلساز گھٹیا بیٹی کی طرح لوٹو تو پھوٹو ورنہ لٹکاۓ جاؤ گے غداری پر اور ایک وزیر آعظم کی حکومت سازش سے گرانے پر وسے حرام خور اور حرام کھانے والے لفافوں پر آللہ کی لعنت اخ تھو https://t.co/4PDiVMFykH	@HassanAyub82 tutorial Umm Hareem sir, it is coming back, you should celebrate what you have stolen and return like an advertising fugitive and a forger's lousy daughter. God's curse on those who eat haram and those who eat haram https://t.co/4PDiVMFykH	NIL	NIL	Hate
1565737191808155649	خان کی دماغی صحت کے لیئے انکی گانڈ کی فیزیوتھراپی حکومتی خرچے پر کرائی جائے ۔ پنکی چورنی اور پی ٹی آئی کا مطالبہ https://t.co/Pj0UUxFq2M https://t.co/LGgD1MJXqY	For Khan's mental health, the physiotherapy of his donkey should be done at the government's expense. Pinky Chorni and PTI demand https://t.co/Pj0UUxFq2M https://t.co/LGgD1MJXqY	آئی ایم ایف سے قرض منظور کروا کر سازشی فتنے کی "گاف" میں ثنڈا تن دیا یوتھلیے پکچر دیکھ کر ڈلیٹ کر دیں آتَ	Conspiracy by sanctioning loan from IMF In the "gaaf" of Fitna, Thanda Tan Daya Please delete the picture after seeing it	Hate
1566662854060789762	@SdqJaan کیا 25 مئ کو پرامن احتجاج کرنے والے معصوم بچے غدار اور دہشت گرد تھے، جنہیں پاکستانی فورسز نے ایسے درندگی اور بربریت کا نشانہ بنایا جیسے مقبوضہ کشمیر میں بھارتی فوج ظلم کرتی ہے، میرے بچے سوال کرتے ہیں کہ ایسا کیوں ہوا ہمارے ساتھ کیا ہم غدار ہیں، دہشتگرد ہیں؟ کون دے گا جواب؟ 😢😢 https://t.co/4hoP4DS7DG	@SdqJaan Were the innocent children who protested peacefully on May 25 traitors and terrorists, who were subjected to brutality and brutality by the Pakistani forces like the Indian army in Occupied Kashmir, my children question why this happened to us. Are we traitors, terrorists? Who will answer? 😢😢 https://t.co/4hoP4DS7DG	‎-٦‏ و وت	- 6 and Wat	Hate
1563233417491144704	@aisha_bibi1 یہ مّلا فضلُو کتا سور ابوجہل کی نسل سے حرامی دین فروش، ماں فروش اور اسکے پٹھو سور کے بچے منکر مشرک۔ اخخخخ تھووو https://t.co/9uwxYb8lx7	@aisha_bibi1 This Mulla Fazloo dog is a blasphemer from the generation of Abu Jahl, a peddler of religion, a mother peddler and her meat pig child is a disbeliever polytheist. Ahhhhhh thoooo https://t.co/9uwxYb8lx7	NIL	NIL	Hate
1563153313935241217	افسوس سد افسوس کرچی میں ایک اور بچی اپنے جاھل مذھبی انتہا پسند درندے باپ کی درندگی کی بھینٹ چڑھ گی نام نہاد غیرت کے نام پر قتل جب تک مذھبی انتہا پسند ملونڈوں کو نیوٹرلز اپنے مذموم مقاصد کے لئے استعمال کرتے رھیں گے تب تک یہ درندگی بڑھتی رھے گی https://t.co/v3oLaBC2ih	Alas, Alas, another girl in Karachi will be subjected to the brutality of her ignorant religious extremist beast father. The so-called honor killing. As long as the religious extremists continue to use the neutrals for their nefarious purposes, this brutality will increase. Will live https://t.co/v3oLaBC2ih	NIL	NIL	Hate
1563482047905427457	حالیہ بارشوں سے ملک کے مختلف حصوں میں صورتحال نازک۔ حکمرانوں پر سوائے افسوس کے کچھ نہیں کہا جا سکتا ۔ یا اللہ لوگوں کی حفاظت کر 🤲🤲 انسانیت کے ناطے لوگوں کی بھرپور مدد کریں۔ سیلاب روٹین کی چیز ہے خیبرپختونخوا حکومت کا بیان انتہائی شرمناک ہے #JK_PG #PakistanFloods https://t.co/WUoeYVeJpz	Due to the recent rains, the situation in different parts of the country is critical. Nothing but pity can be said about the rulers. May Allah protect the people 🤲🤲 Help people as a human being. The flood is a routine thing, the statement of Khyber Pakhtunkhwa government is very shameful #JK_PG #PakistanFloods https://t.co/WUoeYVeJpz	NIL	NIL	No_Hate
1587733426655973377	@AbidSherAli تیرے گھر کوئ مولوی آندا اے اج کل یا اس لندن والے 18 سال دے منڈے نے بند کر دتی اے https://t.co/HvDBMw88Q8	@AbidSherAli did any cleric come to your house yesterday or this 18-year-old Londoner would have been closed on Monday https://t.co/HvDBMw88Q8	NIL	NIL	Hate
1573949606617964544	دیوبندی اللہ کے ولیوں کے مزارات پر جانے پر شرک مشرک کے فتوے لگاتے ہیں اب کیا ان دیوبندیوں سے امید کی جاسکتی ہے کہ یہ طارق جمیل پر دیوبندی مشرک کا فتوہ لگائیں گے یا پھر منافقت سے کام لیں گے #فائنل_کال_ہاہاہا https://t.co/oNPX7iImH4	Deobandis impose fatwas of polytheism on visiting the shrines of Allah's saints. Now, can these Deobandis be expected to issue a fatwa of Deobandi polytheism on Tariq Jameel or else they will act hypocritically. #final_call_haha https://t.co/oNPX7iImH4	NIL	NIL	No_Hate
1571466789657387010	شرپسند عناصر داتا صاحب کو مانتے ہیں لیکن داتا صاحب کی تعلیماتِ محبت و امن کو نہیں مانتے… ہم مسجد اور دربار شریف کا تقدس پامال کرنے والوں کی شدید مذمت کرتے ہیں… ریاست ایسے انتہاپسند عناصر کے خلاف سخت قانونی کارروائی کرے۔.... پیر سید علی رضا شاہ کاظمی https://t.co/PJKJmjg4rn	Evil elements believe in Data Sahib but do not believe in Data Sahib's teachings of love and peace... We strongly condemn those who violate the sanctity of Masjid and Darbar Sharif... State should take strict legal action against such extremist elements.... Pir Syed Ali Raza Shah Kazmi https://t.co/PJKJmjg4rn	NIL	NIL	No_Hate
1564940327353552897	@ImranRiazKhan میری پیدایش لاھور کی ھے بد قسمتی ھے کہ تعلیم یافتہ ھون-دونو خاندانون مین کوی حلال کا نھی بلاول کے بارے مین آپ جانتے -مریم کے بارے مین آپ جانتے ھین نواز کے کزن میرے ساتھ پڑھتے تھے 4تھی جماعت مین بھی چوری کرتے تھے۔جو ڈوب گیے اللہ مغفرت فرماے ان پر لعنت مگر موٹا مر جاے دیگ دون گا۔ https://t.co/ddMg2LwHzY	@ImranRiazKhan I was born in Lahore, it is unfortunate that I am educated - there is no halal in my family, you know about Bilawal - you know about Maryam, Nawaz's cousin used to study with me and used to steal in 4th standard. Those who drown, may Allah forgive them, curse them, but the fat one will die. https://t.co/ddMg2LwHzY	NIL	NIL	Hate
1564612673169506304	مٹہ چوک, سوات میں خدائ خدمتگار آرگنائزیشن کے زیراہتمام سیلاب زدگان کیلئے منعقدہ کیمپ میں ضلعی اور صوبائ رہنماء سیلاب زدگان کی بحالی کیلئے عطیات جمع کررہے ہیں #FloodsInPakistan #KKO @AimalWali @Khadimhussain4 @ah16905695 @IsrarAh53573203 @GhulamABilour @ismailgigyani @SamarHBilour https://t.co/wMVRvptIAy	District and provincial leaders are collecting donations for the rehabilitation of the flood victims in a camp organized for flood victims under the auspices of Khudai Khittgar Organization in Matta Chowk, Swat. #FloodsInPakistan #KKO @AimalWali @Khadimhussain4 @ah16905695 @IsrarAh53573203 @GhulamABilour @ismailgigyani @SamarHBilour https://t.co/wMVRvptIAy	NIL	NIL	No_Hate
1566081167069024256	جو پاکستان ذندہ باد کا نعرہ لگاتا ہے وہی ریاستی درندگی کا نشانہ بنتا ہے !!! ⁧#پاکستان_کی_ضرورت_عمران_خان⁩ ⁦#PakistanNeedsImranKhan https://t.co/uAAseVQCnT	The one who shouts Pakistan Zinda Bad is the target of state brutality!!! #Pakistan_Ki_Darhut_Imran_Khan #PakistanNeedsImranKhan https://t.co/uAAseVQCnT	NIL	NIL	Hate
1566681563303186433	بس خدا اتنا پیسہ دےدے کہ اپنی ایک کونڈم کی فیکٹری لگا کر مفت بانٹ سکوں تاکہ ایسے👇 لوگوں کی پیدائش رک سکے 😀🔥 شام 😈👑 https://t.co/W5TyHOvQWe	May God give me enough money to set up a condom factory and distribute it for free so that the birth of such people can be stopped 😀🔥 Evening 😈👑 https://t.co/W5TyHOvQWe	NIL	NIL	Hate
1581506875220439040	بھارت کیخلاف میچ میں بابراعظم نے ’’فاسٹ بولرز‘‘ کو اہم ہتھیار قرار دیدیا https://t.co/txo9v8DtRx https://t.co/h20C6Ndvr1	In the match against India, Babar Azam called "fast bowlers" as an important weapon https://t.co/txo9v8DtRx https://t.co/h20C6Ndvr1	بھار ت تنا ے مٹش ار نشم نے 2فاسٹ بوار تہ | کوا جھ تھا رق ر ارد ید یا	Bharata Tana Ne Matish Ar Nasham has done 2 fast wells Kwa jha tha rak r ard yed ya	No_Hate
1587412674257866752	کوئٹہ کے ہزارہ کمیونٹی کےمطالبے کی تکمیل کورکمانڈر بلوچستان لیفٹیننٹ جنرل آصف غفورکا احسن اقدام کورکمانڈرکی خصوصی ہدایت پرہزارہ ٹاؤن میں پولیس سٹیشن قائم کردیا گیاآنے والے دنوں میں ماڈل پولیس سٹیشن قائم کیاجائے گا تاکہ علاقے کے لوگ اس سہولت سے فائدہ اٹھا سکیں. #PakArmyZindabad https://t.co/eCrA7eMQ4c	Fulfilling the demands of the Hazara community of Quetta A police station was established in Hazara town on the special instructions of Balochistan Lieutenant General Asif Ghafoor. In the coming days, a model police station will be established so that the people of the area can benefit from this facility. #PakArmyZindabad https://t.co/eCrA7eMQ4c	NIL	NIL	No_Hate
1614492039718252544	خوف کے بت توڑو اور اپنی آزادی کیلئے بلے پر مہر لگاو کراچی والو #بلے_پہ_ٹھپہ https://t.co/FxD06jpUhz	Break the idols of fear and seal the bat for your freedom, Karachiites #বল্য_প়_ত্তা https://t.co/FxD06jpUhz	بلے پہٹھپہلگاؤ آزادیکوگےۓلگاؤ	Bat Pehatpahalgao Hold on to freedom	No_Hate
1561584859239198721	#پاکستان کے حقوق کمیشن نے #اقلیتی #احمدیہ برادری پر ظلم و ستم کی مذمت کی۔ https://t.co/J6DqkpA6yg @MilapNN #Pakistan #Ahmadiyya https://t.co/Odh0aHAKDH	The Rights Commission of #Pakistan has condemned the persecution of the #minority #Ahmadiyya community. https://t.co/J6DqkpA6yg @MilapNN #Pakistan #Ahmadiyya https://t.co/Odh0aHAKDH	NIL	NIL	No_Hate
1578425083080585220	@ImranRiazKhan سر انکی شکل تو دیکھو ایسا لگتا دونوں نے ایکٹا ھیرامنڈی میں مشترکہ کوئی چکلا چلایا ھوگا https://t.co/X6CGhYp4nm	@ImranRiazKhan sir, look at their looks, it seems that both of them have played a joint trick in Acta Hiramandi https://t.co/X6CGhYp4nm	ال مکارازل ان مرالتؤں کے مر و +وپی جن عرالتوں کا الصاف یں رمیا میں کک ا ان ہے <۰	Al Makarazl was the death of these martyrs + Cure the ailments of the people Rumiya has a cook-in <0	Hate
1596097671474819072	ڈائریکٹر جنرل ڈاکٹر خطیر احمد اور ڈسٹرکٹ ایمرجنسی آفیسر سید شعیب منصور کی ہدایت پر ٹریننگ ونگ انچارج ریسکیو 1122 خیبر ڈاکٹر وکیلِ شاہ نے تحصیل باڑہ میں خیبر ماڈل کے طلباء کو ابتدائی طبی امداد،آگ سے بچاؤ اور ناگہانی صورتحال سے نمٹنے کے حوالے سے ایک روزہ تربیت فراہم کی https://t.co/dvzG1diKSS	On the instructions of Director General Dr. Khateer Ahmed and District Emergency Officer Syed Shoaib Mansoor, training wing in-charge Rescue 1122 Khyber Dr. Wakil Shah conducted a one-day training on first aid, fire protection and emergency response to the students of Khyber Model in Tehsil Bara. Training provided https://t.co/dvzG1diKSS	NIL	NIL	No_Hate
1614986525632069632	جب تک یہ بیغیرت سلیکشن کمیشنز ہے تب تک ملک میں صاف اور شفاف الیکشن نہیں ہو سکتے اسکے ہوتے ہوئے ٹھپہ مافیا ہی جیتے گا https://t.co/ez8615xe3Z	As long as there is no honest selection commissions, there cannot be a clean and transparent election in the country, but the mafia will win https://t.co/ez8615xe3Z	NIL	NIL	Hate
1581320244781494273	شیر دل خاتون تکفیریوں پر اکیلے بھاری ملت تشیع کی پہچان ہماری خواہر سیرت زینب کبریٰ پر گامزن سیدہ گل زہرا رضوی کے خلاف تکفیریوں کے مہم کی مذمت کرتے ہیں @GulZehraRizvi1 آپ کے شانہ بشانہ کھڑے ہیں امان میں رہے ۔ #IstandwithGulZehRarizvi #IstandwithGulZehRarizvi https://t.co/gZ4gfD0LQx	The lioness lady Heavy alone on the Takfiris Identity of the Shia nation Our wish Biography of Zainab walking on Kabra Syeda Gul condemns the campaign of Takfiris against Zahra Rizvi @GulZehraRizvi1 Standing by your side Be safe. #IstandwithGulZehRarizvi #IstandwithGulZehRarizvi https://t.co/gZ4gfD0LQx	۹۳1 ۹ ۲۲۹٢۲٢ ۰7١ا(‎ ۲۹۲۱۱9۹+	931 9 229222 071a ( 2921199+	Hate
1579511189432066049	@PTIofficial @ImranKhanPTI جیو وزیر اعظم مریم لعنت بیہن چود بڈھے گانڈو طوطے لعنت اللہ علی الکاذبین والمشرکین والقادیان و الرافضین https://t.co/KHpTCZ2hZE	@PTIofficial @ImranKhanPTI Long live Prime Minister Maryam Damn you fourteen big parrots God's curse on the liars, the polytheists, the Qadiyans and the rejecters https://t.co/KHpTCZ2hZE	NIL	NIL	Hate
1594140764405174272	عالمی عدالتوں سے سرخرو ہونے والے مہاجروں کے متفقہ قائد جناب الطاف حسین اپنے ہی ملک کی عدالتوں سے انصاف کے لئے منتظر ہیں جئے مہاجر جئے الطاف حسین #AltafNeedsJustice @AltafHussain_90 @OfficialMqm https://t.co/Kf5QkRCaAe	Mr. Altaf Hussain, the unanimous leader of the refugees who have been turned away from the international courts, is waiting for justice from the courts of his own country. Jai Mahajir Jai Altaf Hussain #AltafNeedsJustice @AltafHussain_90 @OfficialMqm https://t.co/Kf5QkRCaAe	7 ۃ0. پر اپنے بی مل کفکی عدالنتوں سے انصاف حاص٥‏ لکمرنے کے لئ بھی میں مخنظ ہیں ‎٠٤‏ ال ‎۲۱۷۲۶٢8٢۶‏ ۸۲۲۸م رر	7 0. But Seek justice from your B-Mil Kafki courts I am sorry for that 04 Al 217262826 8228 M Rar	No_Hate
1573958790256402438	@Arsalan_Hazarvi @AyeshaA06549927 @pti_saeen @LabbaikWly @MA_Rizv @RizwanRavi2 @YousraWaris @rizvia_ayesha98 @ayat_Rizvii @HayaRizvia69 @RizviaMahi @tlp_092 @Usman_Ameen3 جاہل جس کو عقائد اسلام کو نہیں پتا دوسروں کو کافر بول رہا ہے https://t.co/hAFN2lGQ0o	@Arsalan_Hazarvi @AyeshaA06549927 @pti_saeen @LabbaikWly @MA_Rizv @RizwanRavi2 @YousraWaris @rizvia_ayesha98 @ayat_Rizvii @HayaRizvia69 @RizviaMahi @tlp_092 @Usman_Ameen3 Ignorant who does not know the beliefs of Islam is calling others kafir https://t.co/hAFN2lGQ0o	NIL	NIL	No_Hate
1614973270331199489	کابل:- سابق افغان رکن پارلیمنٹ مرسل نبی زادہ کو نامعلوم مسلح افراد نے کابل میں ان کے گھر میں قتل کر دیا۔ Yesterday https://t.co/VaBhAVvqPk	Kabul:- Former Afghan MP Mursal Nabzada was killed by unknown gunmen at his home in Kabul. Yesterday https://t.co/VaBhAVvqPk	NIL	NIL	No_Hate
1579210646415347712	بلکل ٹھیک کہتا تھا؛ جماعت اسلامی کے سابق امیر قاضی حسین احمد کہ یہ آرمی شہید نہیں بلکہ مردار ہے. آج اپنی آنکھوں سے دیکھا. حرامی کے بچے ہی ہے یہ پاکستانی نہیں بلکہ اسرائیلی نسل کے ہیں. #SwatRejectsMilitancy #Swat https://t.co/sdsPcBYXu0	He was right; Former Amir of Jamaat-e-Islami Qazi Hussain Ahmed that this army is not a martyr but a dead man. Saw with my own eyes today. Harami's children are not of Pakistani origin but of Israeli descent. #SwatRejectsMilitancy #Swat https://t.co/sdsPcBYXu0	NIL	NIL	Hate
1592486001070723072	@MemonaMushtaq اس گنجے کی ماں کے منہ پر مٹھ مارنے آ رہے ہیں اسلام آباد کیونکہ سنا ہے یہ دلہ اپنی ماں بہن بیٹی بیوی سب کو لے کر آیا ہے پیسوں کے عوض پیش کرتا ہے یوتھیوں کے نیچے https://t.co/1jsHtdyywo	@MemonaMushtaq are coming to Islamabad to punch this bald mother's face because I heard that this heartthrob has brought his mother, sister, daughter, wife, all of them and offers them for money under the yuthi https://t.co/1jsHtdyywo	‎92۱/۸۵٥۴۱3۱۸ ۷۲۲۵۹‏ 5۷۵۲۱۹۲ یہ اس اکاؤنٹ والے گنجے دلال کی اصل تصویر ہے اور نام آپتی نپاخی گا استعمال کر رہا جس کی دلالی کرتا ہے۔	921/85541318 72259 5752192 This is the origin of the bald broker with this account Use the image and name Apti Nipakhi The one who brokers.	Hate
1565760463891210240	@MoonisElahi6 جلسے پہ جلسہ کرنے والے عمران کو سیلاب سے متاثرہ علاقوں میں جاتے ہوئے موت پڑ جاتی ہے #ملک_دشمن_بیانیہ_نامنظور #گجرات_شجاعت_کا https://t.co/U7mbmF75sj	@MoonisElahi6 Imran, who was holding rally after rally, dies while going to flood affected areas #ملك_دشمن_بيانيه_نامنزور #GUJARAT_SHJAAT_KA https://t.co/U7mbmF75sj	۸۸۷۸۷7۴ ۱ /)]) ۸2 ہہ ہے6 ٢۔٠“‏ وک یا ہااوروز بناد نادیاء تھے ڈاک وکہااورا نہد ادا قو دکو کا 207-76 آں ا وچ و یل ناد با اور ایک ما ہب7 ای لئ بر ہم رپ یےے نپ رسپ رم سے رر ں -ے	8878774 1 /]) 82 It is 6 2.0". Vika or Havaroz were not paid for the post 207-76 of Qu Dakku An ouchville nadba and a mahab7 Ye lie bar hum rip yeye Get rid of the nippers	Hate
1581303084768108544	پشتون وطن کی ایک اپنی روایات کے مطابق جرگے ہوتے ہیں جس میں غلط کو غلط اور ساہی کو ساہی کہتے ہیں یہ مسنوعی اور بناے گٸ سرکاری جرگے پشتنوں کے نہیں ہیں نہ اس کو پشتون وطن کی جرگو کی نام دیا جاے #سوات_سرکاری_جرگہ_مردہ_باد #سوات_امن_مانگ_رہا_ہے https://t.co/crw3LinZ1I	The Pashtun country has its own Jirga according to its own traditions, in which wrong is called wrong and Sahi is called Sahi. #Swat_Sarkari_Jirga_Murda_Bad #Swat_peace_is_being_demanded https://t.co/crw3LinZ1I	NIL	NIL	Hate
1567439765057798144	کون ہرا سکتا ہے اس انسان کو جو تمہاری لڑائی میں شامل ہی نہیں، اسکا رستہ اسکی منزل ہی الگ ہے، یہ احمق لوگ ہواؤں سے لڑ رہے ہیں، اس سے لڑنے کے لیے اس جتنا انچا اٹھ کر تو دیکھاو پہلے کبھی ززمین پر رینگنے والے کیڑے ہواوں میں اڑنے والے شاہینوں سے مقابلہ کر سکتے ہیں https://t.co/nXd2zMm4XX	Who can defeat this person who is not in your fight, His path is different from his destination. These fools are fighting the winds, Rise up as high as you can to fight it, see if ever the insects crawling on the ground can compete with the eagles flying in the air https://t.co/nXd2zMm4XX	NIL	NIL	Hate
1614307453621112832	🥀🍂اپنے والدین کے لئے کچھ کرنا چاہتے ہیں تو صرف اتنا کیجئے کہ" کوئی آپکی وجہ سے انکی تربیت پر انگلی نا اُٹھائے🍂 https://t.co/62nROcjlIP	🥀🍂 If you want to do something for your parents, just do it so that no one raises a finger on their education because of you🍂 https://t.co/62nROcjlIP	NIL	NIL	No_Hate
1564205371715198977	جب کبھی شوہر سے لڑائی ہو جائے تو بلکل بھی بدتمیزی نہیں کریں یا زبان نہ چلائیں بلکہ ایک منٹ کے لیئے cool ہو جائیں اور شوہر کے آفس جانے کے بعد رات کے کھانے کے لیے یہ سب چیزیں بنائیں۔۔۔۔😂😂🤣 کیہڑی کیہڑی کم دی گل دساں توانوں https://t.co/AMp1bmrVhQ	Whenever you have a fight with your husband, don't be rude or use language at all, but be cool for a minute and cook all these things for dinner after your husband goes to office.😂😂🤣 Kehari Kehari Kim Di Gul Dasan Tawanon https://t.co/AMp1bmrVhQ	NIL	NIL	No_Hate
1593048320397938690	مقبوضہ کشمیر میں بہت سارے کشمیری صحافیوں نے بھارتی ایجنسیوں کے کہنے پہ مظالم نہ دکھانے سے انکار کر دیا کشمیر میں ہندوتوا ایجنڈے کو آگے بڑھانے کے لیے مودی حکومت کی لائن پر چلنے کے بجائے کئی انگریزی اخبارات سے استعفیٰ دے دیا۔ #ReleaseHurriyatLeadership @BKYMofficial https://t.co/ry3QZjnU2t	In Occupied Kashmir, many Kashmiri journalists refused to show atrocities at the behest of Indian agencies Instead of toeing the Modi government's line to advance the Hindutva agenda in Kashmir Resigned from several English newspapers. #ReleaseHurriyatLeadership @BKYMofficial https://t.co/ry3QZjnU2t	NIL	NIL	No_Hate
1578088532953923593	گزشتہ روز سیکیورٹی فورسز پر حملے میں ملوث خارجی پشاور حسن خیل میں جہنم واصل۔۔۔ جبکہ ان کے کمانڈر عبد الرحیم کو زخمی حالت میں گرفتار کرلیا گیا ہے ۔۔۔۔۔ https://t.co/ntyfsbDbY6	The foreigner who was involved in the attack on the security forces yesterday died in Peshawar Hasan Khel. While their commander Abdul Rahim has been arrested in an injured state. https://t.co/ntyfsbDbY6	NIL	NIL	No_Hate
1608459413341495297	دسمبر کی بارش سردی آوارہ گردی من چلوں کا موسم😛 #December #rain⛈️🌧❄️🌬☔️☃️ #Lahore https://t.co/mT4tjX6p88	December rain cold Wandering It's the season of fun #December #rain⛈️🌧❄️🌬☔️☃️ #Lahore https://t.co/mT4tjX6p88	ےی سس سھملت 0 0- 008۴ 71 08161111	Yes, sis Inclusion 0 0- 0084 71 08161111	No_Hate
1613586010163617792	اخلاق کا اچھا ہونا اللہ کی محبت کی دلیل ہے بے شک جو اللہ سے محبت رکھتے ہیں وہ اللہ کی مخلوق سے محبت کرنے والے ہوتے ہیں @MirBabarLoond @BBhuttoZardari https://t.co/Nx9ZND6Zkq	Good morals are proof of God's love Verily, those who love Allah They are lovers of Allah's creation @MirBabarLoond @BBhuttoZardari https://t.co/Nx9ZND6Zkq	NIL	NIL	No_Hate
1580264646086299651	فیزیوتھراپی کمیونٹی کےلیے یہ معاشرہ جس قدرگھٹن زدہ بنتا جارہاہے ان زندگی اتنی ہی تحقیر آمیز بنتی جارہی ہے بیروزگاری کی وجہ سے ان کے زندگی کا دائرہ تنگ پڑتا جارہاہےحکومتی نمائندوں کےجھوٹ فیزیوکمیونٹی کے مسائل کودبانا۔حکومت کی بےحسی سی ایم بلوچستان کی نااہلی میں اضافہ کرتاجارہاہے https://t.co/CLSEPe6Fp3	The more this society is becoming suffocated for the physiotherapy community, the more humiliating their lives are becoming. Due to unemployment, their life is getting narrower. The lies of the government representatives are spreading the problems of the physiotherapy community. The indifference of the government is increasing the incompetence of CM Balochistan. ://t.co/CLSEPe6Fp3	NIL	NIL	Hate
1566351947992555523	صیہونی عناصر منامہ (یمن)کے 40 فیصد پرانے علاقوں کو ہتھیا کر وہاں ایک صیہونی علاقہ قائم کرنے کے لئے سرگرم عمل ہو گئے ہیں۔ https://t.co/deueJygvd4	The Zionist elements have taken over 40% of the old areas of Manama (Yemen) and are active in establishing a Zionist territory there. https://t.co/deueJygvd4	NIL	NIL	No_Hate
1573657180628189190	عمران خان صاحب کی اس پیشکش کو کوئی قبول نہیں کرے گا کیوں کے اگر ایسا ہوا تو بہت بڑے بڑے سازش کی بیک پر کام کرنے والے ننگے ہوں گے اس لیے وہ تحقیقات نہیں ہونے دیں گے۔لکھ کے رکھ لیں https://t.co/nLHxuZU3oI	No one will accept this offer of Imran Khan, because if this happens, those behind the big conspiracy will be exposed, so they will not allow the investigation. Write it down https://t. co/nLHxuZU3oI	بریل نوز ارک ساکری ات ۶+۶-ت77“:. ... اہ یج 23 تت ۹ ,"و شپباز شی کی تق یلک کے دلوالیہ دنےکااعلان ہے ؛ ران خان	Braille nose Arak Sakri Ut 6+6-T77“:. ... Oh yeah 23 Tat 9, "W Shipbaaz is the announcement of the day of Taq-e-ilk; Ran Khan	No_Hate
1558914616352284672	پھانسی کے وقت مجرم نے رسی کو چوم لیا ۔ جج نے پوچھا " تم نے ایسا کیوں کیا ؟ مجرم نے جواب دیا " رسی مجھے زمین پر گرنے نہیں دے گی لیکن بہت سے قریبی دوستوں نے مجھے ہمیشہ گرانے کی کوشش کی۔ ہمیشہ اچھے دوست تلاش کریں۔ کم دوست بنائیں لیکن اچھے اور مخلص دوست بنائیں https://t.co/iqwesrX3KT	At the time of execution, the criminal kissed the rope. The judge asked, "Why did you do this?" The culprit replied " The rope would not let me fall to the ground but many close friends always tried to pull me down. Always find good friends. Make less friends but make good and sincere ones https://t.co/iqwesrX3KT	مدحعکعمہمصچمجہ ى'	Madhaakumhamschamjah y'	No_Hate
1598618790094409728	گندی نالی کے کیڑے، گوبھر کے کیڑے، ثور کی اولاد وہ تم خود تھے۔ #وہ_تم_خود_تھے https://t.co/SiI5dfcB9u	Filthy sewer worms, dung worms, children of Thor, they were yourselves. #They_were_yourself https://t.co/SiI5dfcB9u	۹ ۱ جح جس نے سوکل میڈیا بب ناشن ره نے کے سے ظالمانہ قانون بڑائے	9 1 Jah Who is the social media bib nation Raised cruel laws	Hate
1558463353403719682	علامہ اقبال خان بھی پتہ تھا ایسا حرامی ائیں گے اس لیے پہلے ہی فرما دیا رانا کے بارے میں https://t.co/xdEJoPnKci	Allama Iqbal Khan also knew that he would bring such a crime, so he already said about Rana https://t.co/xdEJoPnKci	چسیں تھا جہۃ ہم نے احرام میں لپٹے ابلیس دیکھے ہس اہک	Chasin Tha Jaha We saw Iblees wrapped in Ihram Hiss	Hate
1564198599721947138	کون جیتے گا اس لڑائی میں؟ 🤔 https://t.co/8SEQlb3ijM	Who will win in this fight? 🤔 https://t.co/8SEQlb3ijM	NIL	NIL	No_Hate
1585040829529223168	@apple968 لے دیکھ تیری باجیاں مموں کی نمائش کر رہی ہے اور دعوت دی رہی جلسے میں آو اور چودو ہمیں لیکن پٹواریوں کا اتنا لو سٹینڈر نہیں کے یوتھیوں کی باجی کو چودے۔۔۔ہان منہ میں ڈال دے گے انکے کیوں کے بہت شوق ہے تیری باجیوں کو منہ میں لینے کا https://t.co/Y5B6crM7Qt	@apple968 take a look at your bajian showing off and giving invitations come to the gathering and kiss us but the patwaris don't have such a low standard to kiss the yothi's baji. To take your bajis in your mouth https://t.co/Y5B6crM7Qt	NIL	NIL	Hate
1595718881158602752	@TariqJamilOFCL آپ جیسے شخص کا اس کمینے انسان اور ڈرامے باز سے ملنا بنتا ہںے۔ چاپلوس مُلاں حضرت🖐 شریعت کے باغی https://t.co/TDcjEtzcUF	@TariqJamilOFCL Someone like you gets to meet this bastard human being and dramatist. Flattering Mullan Hazrat 🖐 Sharia rebels https://t.co/TDcjEtzcUF	NIL	NIL	Hate
1581198891210317825	جو اس ملک کے آئین وقانون اوراداروں اور کو نہیں مانتا اور اُن کو گالی دیتا ہے وہ نہ صرف مردود ہے بلکہ غداراعظم ہے اور یہ قوم اُس کو معاف نہیں کرے گی۔ #غداراعظم_عمران_نیازی https://t.co/HWsJURa57c	Whoever does not obey the constitution, laws and institutions of this country and abuses them is not only rejected but also a traitor and this nation will not forgive him. #गडाराईजम_अमरान_नियाज https://t.co/HWsJURa57c	لوگوں کے صکھبر خریدنے کے ناقایل روید شوت سام آنے کے بح دکیا عمران کو ۱ ' ٰ۹ھ) 00 اڑل اور ‎١‏ لن	People's tendency to buy Sukhbar Thank you Imran for coming 1' 9h) 00 Udal and 1 lin	Hate
1567548009142943746	#محفل_سخن آج سر میں بہت شدید درد ھے ۔تمنا ہے گلابوں سے میں الجھوں چمیلی کے بھی سائے چاہتا ہوں پڑھ کر محبت کی دو چار غزلیں پھر اس کے بعد چائے چاہتا ہوں @s4566_ @B_7861 @Azk_boyE @mehvish_ijaz https://t.co/hcuaG42RPq	#Mahfil_Sakhon Today I have a very severe headache I wish to be confused with roses I want jasmine shadows too Read two or four poems of love Then I want tea after that @s4566_ @B_7861 @Azk_boyE @mehvish_ijaz https://t.co/hcuaG42RPq	NIL	NIL	No_Hate
1617823963828322304	یہ ہےسیاست کاوہ بادشاہ جس نےدِن میں ہینڈلرز،پی ڈی ایم اوربھگوڑوں کوتارےدکھادۓ۔اُنکی جھوٹی سیاست کو دفن کردیا۔اب مزیدپی ڈی ایم،ہینڈلرز،بند کمروں میں اور لندن کےفیصلوں کو تسلیم نہیں کیا جائگا اب وہ ہوگا جو پاکستان کی عوام اور خان چاہینگے #چوروں_کا_چور_CM_نامنظور #محسن_نقوی_نامنظور https://t.co/lVLaVBDElx	This is the king of politics who killed the handlers, PDM and fugitives during the day. His false politics was buried. Now no more PDM, handlers, in closed rooms and the decisions of London will not be recognized. Now it will be what the people and Khan of Pakistan want. #চর্র্যা_চুর_চর_CM_নানান #Mohsin_Naqvi_unapproved https://t.co/lVLaVBDElx	ز یس رف رید ور ای کیک رک ال اویل پوس	Z ys ruff red wor e kek ruck al oel pos	Hate
1564224095113428992	وہ سیاست کسی کام کی نہیں ہے جو میری عوام کے کام نہ آئے اس وقت تمام جماعتوں کو یہ سوچنا چاہیے اپنی لڑائی جھگڑے اپنی سیاست پیچھے رکھ کر سب کو آگے آنا چاہیے🇵🇰 @SaniaaAshiq @MaryamNSharif https://t.co/QcGkrIkcZP	That politics is of no use if it does not serve my people, at this time all the parties should think that everyone should put their fights and politics behind and come forward. @SaniaaAshiq @MaryamNSharif https://t.co/QcGkrIkcZP	NIL	NIL	No_Hate
1566079258799362049	میرے خان دی للکار: حاجی سہولتکار کو ایک بار پھر وارننگ- اگر عوام کو کال دے دی تو آپ کو پنڈی اسلام آباد میں چھپنے کی جگہ تک نیں ملے گی- سہولتکارو باز آ جاؤ ورنہ عوام پچھواڑے میں ڈانگ واڑنا جانتی ہے 🤣🤪😅 https://t.co/iYlb9rzYHL	Mere Khan Di Lalkar: Warning to Haji Facilitator once again - If you call the public, you will not find even a place to hide in Pindi Islamabad - Facilitators, stop, otherwise people know how to cheat in the backyard 🤣🤪😅 https://t.co/iYlb9rzYHL	NIL	NIL	Hate
1563491766841421824	موضع رشیدہ میں حاجی یونس کی رہائشگاہ پر منعقدہ کارنر میٹنگ میں مخدومزادہ زین حسین قریشی کی شرکت۔ خضر خان بلوچ، رانجو خان بلوچ، ملک الطاف راں اور دیگر شخصیات بھی ہمراہ شریک۔ #NA157 #BallayPeThappa https://t.co/0pTMgWP7SU	The participation of Makhdoomzada Zain Hussain Qureshi in the corner meeting held at the residence of Haji Younis in Mauza Rashida. Khizr Khan Baloch, Ranju Khan Baloch, Malik Altaf Raan and other personalities also participated. #NA157 #BallayPeThappa https://t.co/0pTMgWP7SU	NIL	NIL	No_Hate
1587684274332991489	#مودی حکومت کی ناکامیوں کو بے نقاب کرنے پر ہند، بریگیڈ کی جانب سے سوشل میڈیا پر صحافیوں کو دھمکیاں اور بدسلوکی کی جاتی ہے #بھارت میں صحافیوں کو آر ایس ایس کی حمایت یافتہ بی جے پی حکومت کی تنقیدی کہانیاں چلانے کے لیے ہندو، فورسز کی طرف سے دھمکیوں کا سامنا کرنا پڑ رہا ہے https://t.co/Wt3SS6tWCv	Journalists threatened and abused on social media by brigade for exposing #Modi govt's failings #Hindu, Journalists in India for running stories critical of RSS-backed BJP govt. Facing threats from forces https://t.co/Wt3SS6tWCv	NIL	NIL	No_Hate
1559908934734970882	@AzmaBokhariPMLN رنڈی کو ہوش آ گئی https://t.co/3BWM5xTHIn	@AzmaBokhariPMLN Randy regained consciousness https://t.co/3BWM5xTHIn	د ین یل کی ہار کوکیا گیا ءسا انس 1کھڑئی اور ہش کھوٹٹھیں	As Daniel's necklace was done, Anas 1 stood and fell	Hate
1560156437447319553	دفاعی بجٹ 🧵 ⬇️ مغربی اور مشرقی دونوں محاذوں پر بے مثال چیلنجز/خطرات کے ساتھ ساتھ ہائبرڈ وارفیئر چیلنجز کا سامنا کرنے کے باوجود، پاک فوج نے ملکی معیشت کو سہارا دینے کے لیے اپنے دفاعی بجٹ میں اضافے کا مطالبہ نہیں کیا۔ #ThankyouPakArmy https://t.co/i3ub4FyLBm	Defense Budget 🧵 ⬇️ Despite facing unprecedented challenges/threats on both the western and eastern fronts as well as hybrid warfare challenges, the Pakistan Army has not sought an increase in its defense budget to support the country's economy. #ThankyouPakArmy https://t.co/i3ub4FyLBm	NIL	NIL	No_Hate
1563456127647760384	کیسے فرعونیت اور غرور ہے اس میں ۔۔۔ یااللہ ان ظالم حکمرانوں سے نجات دلا آمین https://t.co/msusPhRJ5U	How is pharaohism and pride in it? May Allah deliver us from these cruel rulers Amen https://t.co/msusPhRJ5U	NIL	NIL	Hate
1565752785915809793	انگریزی تعلیم نے تو عورتوں سے تن کے کپڑے اتروا دیئے. قربان جاؤں دین محمدﷺ پر جس نے عورت کو پردہ دار بنا دیا💞 https://t.co/kvojppbkZE	English education made women take off their clothes. Sacrifice to the religion of Muhammad ﷺ which made women veiled 💞 https://t.co/kvojppbkZE	NIL	NIL	No_Hate
1564230605587505152	'سیلاب سے متاثرہ بچے انتہائی ناقص حالت میں زندگی گزارنے پر مجبور ہیں' اداکارہ نے مداحوں کو اپیل کی کہ اگر ان کے گھر میں پانی کی ایک خالی بوتل بھی اضافی ہے تو وہ بھی عطیہ کریں، کیوں کہ اس سے بھی بہت بڑا فرق پڑنے والا ہے۔ https://t.co/E3YM4bJgXu https://t.co/r6gbN7Fv5g	'Flood-affected children are forced to live in very poor conditions' The actress appealed to fans if they have even an extra empty water bottle at home to donate, as even that will make a big difference. https://t.co/E3YM4bJgXu https://t.co/r6gbN7Fv5g	حنا الطاف | اداکارہ	Hina Altaf | The actress	No_Hate
1595809049748307970	فیض آباد دھرنا ایک عظیم داستان ہے جسے عالم کفر تا قیامت یاد رکھے گا #انتہاپسند_خون_لیگ_حکومت https://t.co/snLzLgTkfO	The Faizabad sit-in is a great story that the world of infidels will remember till the end of the day #தித்திப்பு_க்கு_லி஗்_குவுத்தி https://t.co/snLzLgTkfO	NIL	NIL	Hate
1577539254179201025	#صوماليه ایک مقامی پولیس اہلکار نے اے ایف پی کو بتایا کہ وسطی صومالیہ میں اسلام پسند گروپ الشباب کی طرف سے دو خودکش (استشھاادی) حملوں میں عہدیداروں سمیت درجنوں اہلکار ھلاک اور زخمی ہوئے ہیں۔۔۔ https://t.co/MJd8ZmXfW1	#Somalia A local police official told AFP that dozens of officials, including officials, have been killed and injured in two suicide (suicide) attacks by the Islamist group al-Shabaab in central Somalia. https://t.co/MJd8ZmXfW1	NIL	NIL	No_Hate
1573966927323693057	دینی جماعتوںمیں قرآن و سنت اور شعائر اسلام کے تحفظ کیلئے کوئی اختلاف نہیں، لیاقت بلوچ https://t.co/GuisHchwdr @liaqatbalochji @JIPOfficial @SirajOfficial https://t.co/DDrIl8IsTe	There is no difference between religious parties for the protection of Quran, Sunnah and rituals of Islam, Liaqat Baloch https://t.co/GuisHchwdr @liaqatbalochji @JIPOfficial @SirajOfficial https://t.co/DDrIl8IsTe	پگ تھے 01 جبنہ بدامجاقع ۷۸۷۳۱۷۷۸۲۷۸۷۰	There were pigs 01 Jabna Badamjaqa 7873177827870	No_Hate
1566100906256515077	ایک کویتی کیھلاڑی صیہونی حریف کا سامنا کرنے سے دستبردار ہو گیا https://t.co/QuJr9T17UL https://t.co/AokbkjbKLu	A Kuwaiti athlete withdraws from facing a Zionist opponent https://t.co/QuJr9T17UL https://t.co/AokbkjbKLu	NIL	NIL	No_Hate
1565921843638411264	#JusticeForMariaMohmmand *اس ٹرینڈ میں شامل ھو کر گینگ ریپ کے خلاف اپنی آواز اٹھائیں اور ماریہ مہمند کے لیے انصاف کا مطالبہ کریں ۔۔* https://t.co/p2Ncs5uIuk	#JusticeForMariaMohammand *Join this trend and raise your voice against gang rape and demand justice for Maria Mohmand.* https://t.co/p2Ncs5uIuk	NIL	NIL	No_Hate
1614489458472001536	عوامی سروے اِن دونوں میں کون مائنس کرے گا اور پاکستان کو حقیقی آزادی سے ہمکنار کرے گا فیصلہ عوام کا #اب_عوام_مائنس_کرےگی https://t.co/BuIyFchMis	Public survey Who will do minus in both of them? And will lead Pakistan to real freedom People's decision #now_the_people_minus_will_do https://t.co/BuIyFchMis	NIL	NIL	No_Hate
1564210278820110337	امریکی فوج کی جانب سے شام میں ایرانی حمایت یافتہ جنگجوؤں کے خلاف دوسرا حملہ - فضائی حملوں نے مشرقی شام میں اہداف پر 9 بم گرائے۔ https://t.co/gIp5qfsrvm	Second attack by US military against Iranian-backed fighters in Syria - Airstrikes drop 9 bombs on targets in eastern Syria. https://t.co/gIp5qfsrvm	NIL	NIL	No_Hate
1560121622513983488	@AdvocateAAKurd میاں سانپ قومی چور بڈھے اتنا پسند ہے تو اپنی بیٹی دے دے بیوی بھی دے سکتا ہے اپنے میاں خنزیر کو رشتہ داری بھراؤ جائداد بھی ہے عوام کی میاں کے پاس کوئی اپنی بیوی کا بیاٹی کا فائدہ کرو بڈھے #شیطان_کے_چیلے https://t.co/23sdsFct1L	@AdvocateAAKurd Mian Sanap national thief If you like it so much, give your daughter away A wife can also give her husband pigs Kinship is also a property. Take advantage of your wife's wealth with the wife of the people #शितान_के_चेल https://t.co/23sdsFct1L	NIL	NIL	Hate
1578234391700164608	یہ حرم شریف کے خارجی صحن، باب السلام کی طرف، شروق کے وقت کی مختلف تصویریں ہیں، جن میں معتمرین نظر آرہے ہیں۔ https://t.co/Q2ChzYIxlj	These are various pictures of the outer courtyard of the Haram Sharif, towards Bab al-Salam, at the time of sunset, in which pilgrims are seen. https://t.co/Q2ChzYIxlj	NIL	NIL	No_Hate
1565259024588840961	بے شک انسانیت کوئی مذہب نہیں رکھتی آج ایک بار پھر الخدمت فاؤنڈیشن ٹانک نے متاثرین سیلاب کیلئے کھانا تیار کرہے ہیں اللہ تعالیٰ قبول کریں 🌺 آمین https://t.co/zCHyHvdC2K	Indeed, humanity has no religion Today once again Al Khidmat Foundation Tank The victims are preparing food for the flood May Allah accept 🌺 Amen https://t.co/zCHyHvdC2K	NIL	NIL	No_Hate
1564874216385691650	مٹہ چوک میں خدائی خدمتگار آرگنائزیشن کے طرف سے سیلاب زدگان کیلئے منعقدہ کیمپ دوسرے روز بھی جاری.. #FloodsInPakistan #KKO https://t.co/fEZXegak9f	The camp organized by Khudai Khittgar Organization for the flood victims in Matta Chowk continued for the second day. #FloodsInPakistan #KKO https://t.co/fEZXegak9f	NIL	NIL	No_Hate
1560262387235946510	بھارت میں انصاف کا قتل ہوا ہے :2002 میں گجرات فسادات میں مسلمان لڑکی بلقیس بانو سے اجتماعی زیادتی، اس کی والدہ، بہن اور 7 رشتہ داروں کے قاتلوں کو بھارتی سپریم کورٹ نے رہا کر دیا، انتہاپسند ہندوؤں کی رہائی پر پرتپاک استقبال کیا گیا،دنیا بھر میں اس رہائی کو انصاف کا قتل قرار C https://t.co/zhdmWZ9PFd	Justice has been murdered in India: In the 2002 Gujarat riots, Muslim girl Balqis Bano was gang-raped, the murderers of her mother, sister and 7 relatives were released by the Indian Supreme Court. Worldwide, this release is called a murder of justice C https://t.co/zhdmWZ9PFd	NIL	NIL	No_Hate
1579042416761671680	ملیئے سندھ کے نئے گورنر ایم کیو ایم کے کامران ٹیسوری صاحب سے ۔ موصوف نے ملک کے لیے گراں قدر خدمات سر انجام دیں جن میں سونے کی سمگلنگ ، قبضہ مافیا ، بھتہ خوری شام ہیں ۔ پیپل پارٹی نے انہیں خودکش بمبار کے لقب سے نوازا ۔ امید ہے یہ سندھ کے حالات بہتر کرنے میں اپنا کردار ادا کریں گے۔ https://t.co/QLmTTctZG9	Meet the new governor of Sindh, Kamran Tesuri of MQM. The said person has rendered valuable services for the country, including gold smuggling, occupation mafia, extortion. The People's Party honored him with the title of suicide bomber. It is hoped that they will play their role in improving the conditions of Sindh. https://t.co/QLmTTctZG9	NIL	NIL	Hate
1593601546658291713	بھارت نے ”دہشت گردی کے خلاف آواز اٹھائی اورا س کے خاتمے تک آرام سے نہیں بیٹھے گا“ کا دعویٰ کرتے ہوئے وزیر اعظم نریندر مودی نے کہا کہ کچھ ممالک اپنی ’خارجہ پالیسی کے حصے کے طور پر دہشت گردی کی معاونت‘ کرتے ہیں اور اس کا حساب ان ہی سے لیا جانا چاہیے۔ https://t.co/trwd7tWaXm	Claiming that India has "raised its voice against terrorism and will not rest until it is eradicated", Prime Minister Narendra Modi said some countries "support terrorism as part of their foreign policy" and It should be accounted for by them. https://t.co/trwd7tWaXm	NIL	NIL	Hate
1596166102203400192	دو بھائی ایک دوسرے کیساتھ اس زمین کے ٹکڑے پر لڑ مرے اس پر انکے والد نے ان دونوں کی قبریں اسی زمین پر بنوا کر کہہ دیا کہ لو سنبھالو اپنی اپنی زمین اور ہم سب کے لئے نشان عبرت بنا ڈالا۔ زندگی چار دن کی ہے محبتیں بانٹیں https://t.co/sX6k36ae4Z	Two brothers died fighting over this piece of land, so their father built the graves of both of them on the same land and said, "Take care of your own land and set a lesson for all of us." Life is four days share the love https://t.co/sX6k36ae4Z	NIL	NIL	No_Hate
1581507780930043907	آوارہ کتے نے چند منٹ میں 25 افراد کو کاٹ لیا، ویکسین کم پڑ گئی https://t.co/ta7uYQ8YuF https://t.co/Jqg3UVWmTs	Stray dogs bit 25 people in a few minutes, the vaccine ran low https://t.co/ta7uYQ8YuF https://t.co/Jqg3UVWmTs	آوارہ کچ ے چئرمٹ یس 25 افراووکاٹ	A wandering raw charmer Yes 25 Afrovocat	No_Hate
1573592982770556928	بیٹا پٹواری سے کیا روشنی نکلے گی وہ تو پہلے سے جلا بھُنا ہے آپ اس گورے گدھے کو پکڑ کر نیچے کرتیں ہر طرف اجالا ہی اجالا ہوتا۔ 👇😆😂 https://t.co/oveUpwYXmb https://t.co/qzRbbsgXcr	Son, what kind of light will come out of Patwari, it is already burnt. 👇😆😂 https://t.co/oveUpwYXmb https://t.co/qzRbbsgXcr	NIL	NIL	Hate
1578039875172851712	ہر صورت پر لُٹ جانا توہینِ وفا ہوتی ہے🖤🥀 *ShaNi*❤️🙂 https://t.co/anzPSNMYFr	Looting in any case is an insult to loyalty 🖤🥀 *ShaNi*❤️🙂 https://t.co/anzPSNMYFr	NIL	NIL	No_Hate
1616496533754744832	ٹھٹھی شریف میانوالی کیلئے ایک اور اعزاز میرے بہت پیارے استاد محترم میاں محمد ارشد صاحب کو لیکچرر اردو سیلیکشن پر مبارکباد..آپ اس وقت بطور SS اردو GHSS داؤدخیل خدمات سرانجام دے رہے ہیں #استاد https://t.co/RPnqDFmcZK	Another honor for Thatthi Sharif Mianwali, my dear teacher Congratulations Mian Mohammad Arshad Sahib on Lecturer Urdu Selection..You are currently serving as SS Urdu GHSS Dawoodkhel. #Teacher https://t.co/RPnqDFmcZK	NIL	NIL	No_Hate
1565757833362169857	#پاکستان_دشمن_پی_ڈی_ایم یہ 1B ڈالر کیلئے IMF کے آگے ڈھیر ہوگے، سیکیورٹی رسک بن چکے۔ شہباز⬆️ عوام دشمن IMF ڈیل سے نکلو۔ بلاول⬆️ ہمیں IMF کا غلام بنا دیا۔ احسن اقبال⬆️ ہماری IMF ناک سے لکیریں کھنچوا رہا۔ ⬆️ مریم ۔ منافقت تو PDM پر ختم سمجھو https://t.co/x4onqeaKQU	#Pakistan_enemy_PDM It will pile up before the IMF for $1B, becoming a security risk. Shahbaz Get out of the anti-people IMF deal. Bilawal Made us slaves to the IMF. Ahsan Iqbal Our IMF continues to draw lines through our noses. ⬆️ Maryam . Hypocrisy ends with PDM https://t.co/x4onqeaKQU	عرش دانے می ری نو تیر سلامت راکنا فرش دالوں کے یی کھا ھا ہوں	Arsh Dane Mi Re No Tir Salamat Rockna I have eaten the floor pulses	Hate
1566730587792195588	محب وطن کو پاکستان کا سر براہ ہونا چاییے نہ کہ مراسلہ کے نیچے گھٹنے ٹیک کر غلامی کرنے والے، جیسا کہ نواز،زرداری۔۔PDM اصل چیز،حقیقت تو ایسی بات ہے۔ سچ بات پر تو عدالتیں بھی شاباش دیں ورنہ افغانستان غلیل،اور بندوق پر لڑتے آزاد ہو گیا جو کہ سچ،حق پر تھا؟؟ https://t.co/ib9Xszt4iv	Patriots should be the head of Pakistan and not those who kneel under the post, like Nawaz, Zardari. On the truth, the courts should also be praised, otherwise Afghanistan became free by fighting on guns, which was true, on the right?? https://t.co/ib9Xszt4iv	ن کو پرائم منسٹر کیوں ان اس ملک میں سب سے زیادہ چارااچائے:والا وزیراعظم ہے, عمران خان نے شہباز شریف کو جب روکتے کا کہا وہاں ہی اس کو ڈ سے سیب سے وس سس ۵	Why N Ko Prime Minister? They bring the most fodder in this country: Wala He is the Prime Minister, Imran Khan asked Shahbaz Sharif to stop It is said to him from the apple 5	Hate
1564528072124256256	10 سالہ فلسطینی طالبہ ایزج اسالیا، جس نے غزہ پر تازہ ترین اسرائیلی جارحیت کے دوران ایک اسرائیلی بمباری میں ایک آنکھ کو کھو دیا ، آج اسکول واپس آئ ہے. کیا یہ دہشگرد نہی سدھرنے والے اقوام متحدہ کیوں خاموش لونڈی بنی ہوئ ہے جانتے ہیں کیوں اس لیے کہ مسلمان ہونے کے بحائے سنی شیعہ ہیں https://t.co/nTyDwNMDMH	10-year-old Palestinian student Ezej Asalia, who lost an eye in an Israeli bombardment during the latest Israeli offensive on Gaza, returned to school today. Do you know why the United Nations has become a silent handmaiden because they are Sunnis and Shias for being Muslims https://t.co/nTyDwNMDMH	NIL	NIL	No_Hate
1581053147350728704	@TahirMughalPml2 سب پھٹو بھاگ کر لندن دوڑ گئے https://t.co/e3meqlPgp8	@TahirMughalPml2 all burst and ran to London https://t.co/e3meqlPgp8	گا ا 4> ۳ 11:05	Song 4>3 11:05	Hate
1567072681010372608	چشمِ ساقی نے عجب کھیل رچا رکھا ہے کوئی رِند، کوئی مئے خوار بنا رکھا ہے https://t.co/BQc2BjNyE7	Chasm-e-Saki has created a wonderful game No rind, no booze made https://t.co/BQc2BjNyE7	NIL	NIL	No_Hate
1598640492941434880	@ImranKhanPTI منافق عمران نیازی کی منافقت دیکھو ، جس انداز میں سینیٹرسواتی نے غریب بچوں کو نشانۂ انتقام بنایا تھا وہ نہایت افسوسناک اور قابلِ مذمت تھا مگر اس منافق عمران نیازی نے اس وقت اعظم سواتی کا ساتھ دیا اور IG تبدیل کر دیا، معصوم بچوں کو مارا گیا اور جیل میں رکھا کیونکہ نیازی حکمران تھا https://t.co/6rEbjdOEpU	@ImranKhanPTI Look at the hypocrisy of hypocrite Imran Niazi, the manner in which Senator Swati targeted poor children was very sad and condemnable, but this hypocrite Imran Niazi supported Azam Swati and changed IG, innocent children. Killed and imprisoned because Niazi was the ruler https://t.co/6rEbjdOEpU	پا فارم للقٍْس: 7	Paw Form لقٍْس: 7	Hate
1565740693015994370	Ali Wazir 💪💪✌✌❤ دو نمبر جھوٹا مکار فراڈی سابقہ بوٹ پالش چاپلوس انقلابی عمران ریاض کی ایک دن میں ہوا نکل گئ جو اسکے منحوس چہرے سے لگتا ہے دوسری طرف فخر قبائل فخر پختون فخر افغان علی وزیر خاندان کے 18 جنازے دینے کے بعد بھی چٹان کی طرح کھڑا ہے #ReleaseAliWazir https://t.co/OTQQKPVCA0	Ali Wazir 💪💪✌✌❤ Number two, liar, deceitful, former boot-polish, flattering revolutionary, Imran Riaz, has lost his air in a day, which seems to be from his sinister face. On the other hand, the proud tribes, the proud Pakhtuns, the proud Afghan Ali Wazir family still stands like a rock after 18 funerals. #ReleaseAliWazir https://t.co/OTQQKPVCA0	NIL	NIL	Hate
1561282595341537280	@NabeelRiaz22 @Sh_am_92 جز وقتی مومن ، اور کل وقتی بیغیرت تحریک TLP کے چمونوں ، 🖐️"ام حریم " اور "ابو رجیم" کی ناجائز اولادو , دین و ملت فروش لعنتیو ، قوم تمھاری اوقات جانتی ہے 🖐️🖐️🖐️ https://t.co/azKiOVzusr	@NabeelRiaz22 @Sh_am_92 Part-time believer, and full-time Beghir Tehreek TLP chamoons, 🖐️ "Umm Hareem" and "Abu Rajeem" illegitimate children, you traitors of religion and nation, the nation knows your times 🖐️🖐️🖐️ https://t .co/azKiOVzusr	خصوضصی تر موٹر اتیگ لک ہلگ لگانا 2000 رٹ جلانا -4000 علانا ۔10000 کیلوں گی" ریڑی لوا -1000	More specifically Motor Atig Lak Hulg Lagana 2000 Writ burning -4000 Alana - 10000 Keil gi” Reedi Loa -1000	Hate
1614472694682062849	اس دلے کو پورا ننگا کرو ! اس نے جو کیا ہے یہ ایک عور وار ہے جس کی مافی نہیں ہو سکتی۔ اس دلے کو ہر ایجوکیشنل institution سے بار کیا جاۓ۔ یہ آدمی پیسے کے لیے اپنی ماں بھی بیچ سکتا ہے ! https://t.co/2VINKGUcDs	Uncover this whole heart! What he has done is an unpardonable crime. This should be repeated in every educational institution. This man can sell his mother for money! https://t.co/2VINKGUcDs	اطح ۲:۶۷۱۲۷۷۶ ؟ 'حا553 1ا۸ 081۲۲ ‎٥٥٥+ [‏ 0طا5 ۷۱۲۹۱	Atah 2:6712776? 'Ha 553 1 A8 08122 555+ [‏ 0ta5 71291	Hate
1593170489551499270	کیا فوجی افسران کو ملنے والی توشہ خانہ تحائف کا کوئی ریکارڈ ہے؟ شیریں مزاری #ہار_مان_لو_ڈرٹی_ہیری https://t.co/nkAYbXSmq0	Is there any record of Tosha Khana gifts received by military officers? Shireen Mazari #Harry_Man_Love_Dirty_Harry https://t.co/nkAYbXSmq0	کیا فو گی افسرا ننکو لے والی آوشہ غانہ حان فک اکو ىر پکارڑے؟ "06	Kya fu gi afsara ninku le wali awsha ghana What are you calling me? "06	Hate
1565263870868213760	قطع کیجے نہ، تعلّق ہم سے کچھ نہیں ہے، توعداوت ہی سہی ہم کوئی ترک وفا کرتے ہیں نہ سہی عشق، مصیبت ہی سہی یار سے چھیڑ چلی جاے، اسد گر نہیں وصل تو حسرت ہی سہی​ #نمود_عشق #رمز_زھرا https://t.co/hpNvuCtbC3	Don't cut off, stay with us There is nothing, even hostility We do not give up No love, no trouble Fuck off dude, Asad If it doesn't fall, it's a pity #Namood_Ishq #Ramz_Zhra https://t.co/hpNvuCtbC3	1س ۹ے ۔	1S 9E.	No_Hate
1573664451491921922	سنئیر صحافی وقار ستی کیخلاف جھوٹےمن گھڑت بے بنیاد مقدمے کی سماعت، ایڈیشنل سیشن جج افضل مجوکہ نے ضمانت کنفرم کرنے کی منظوری دیدی۔ تمام دوستوں کو مبارک باد۔ @waqarsatti https://t.co/l8aLi2KS0C	Additional session judge Afzal Majuka approved the confirmation of bail in the false and baseless trial against senior journalist Waqar Sati. Congratulations to all friends. @waqarsatti https://t.co/l8aLi2KS0C	NIL	NIL	No_Hate
1558941622385123328	@betterpakistan تیرے واسطے۔ جھنڈا اک وی نئیں کیونکہ ڈنڈے تیری بنڈ وچ سن۔ جھوٹا کنجر https://t.co/oBzj13F3Dn	@betterpakistan for you. Don't let the flag fly because the poles are not yours. False conjurer https://t.co/oBzj13F3Dn	NIL	NIL	Hate
1607217025100959745	اللہ تعالیٰ نے ان کی رسی کو ڈھیلا چھوڑ رکھا ہے لیکن وہ وقت دور نہیں جب اللہ تعالیٰ ان کی رسی کو کیھنچے گا تو توبہ کا دروازہ اس وقت بند ہو چکا ہو گا https://t.co/NwhxqkwdJl	Allah Ta'ala has left their rope loose, but the time is not far when Allah Ta'ala will pull their rope, then the door of repentance will be closed at that time https://t.co/NwhxqkwdJl	ف۸ جو ‎٦‏ 4 َ“ صرف ‎٥‏ ماەمیں د تما زر مہارلہ زغا7	F8 which 6 4 Only 5 Maamin D Tama Zar Maharla Zagha ​​7	Hate
1578008125382299648	دہشت گردی، کورونا کا قوم نے جس طرح سے مقابلہ کیا وہ قابل تعریف ہے، صدر مملکت #DialogueUrdu #ArifAlvi #Terrorism #Corona https://t.co/vmdB143l7w	The way the nation has fought terrorism, Corona is admirable, President #DialogueUrdu #ArifAlvi #Terrorism #Corona https://t.co/vmdB143l7w	دہشت گردی, کوروٹا کا قوم نے جس طرح سے مقابله کیا وہ قابل تعریف ہے؛ صدر مملکت ۷ ۷۷ ۷۷۰۵۱۸ ۱٥٢ ۷٢ ٣٤۸۴۱۹۲۸۸۰۴۸۱۱۷	Terrorism, which the nation of Kurota The way he coped was admirable is; President of the State 7 77 770518 152 72 348419288048117	No_Hate
1572512370580426752	ولدزنا نسل اولاد فاحشہ https://t.co/1QFGYBhixf	Sons and sons of prostitutes https://t.co/1QFGYBhixf	NIL	NIL	Hate
1595033616135888897	چئیرمین واراکین تنظیم نسل نو ھزارہ مغل بلوچستان یونیورسٹی کی طالبہ نسرین اسحقعلی کو شعبہ نفسیات میں 4th پوزیشن حاصل کرنے پر مبارکباد پیش کرتے ہیں۔ڈھیر ساری دعائیں نسرین اسحق کے لئے کہ وہ زندگی کے تمام شعبوں میں کامیاب و کامران ہو۔افتخار قوم صدقه شَوُم بينى پ. #StopHazaraGenocide https://t.co/b8Dxw4No8L	Chairman Warakin congratulates Nasreen Ishaq Ali, a student of Hazara Mughal University of Balochistan, for securing the 4th position in the Department of Psychology. We pray for Nasreen Ishaq to be successful and efficient in all areas of life. Benny P. #StopHazaraGenocide https://t.co/b8Dxw4No8L	NIL	NIL	No_Hate
1564948122551439360	چلتے ناکے سے جو ظالم نے گرایا تھا مجھے تو ایک بی بی نے گلے آکے لگایا تھا مجھے اپنی آغوش میں کچھ دیر سلایا تھا مجھے ساتھ بابا کے میرے آئ ہے پھر وہ بی بی اب میں سو جاؤں گی #سکینہ_بنت_الحسین https://t.co/zg6hnrtTXH	The cruel one dropped me from the walking path So a BB hugged me He hugged me for a while Saath Baba ke mere ai hai then that bb Now I will sleep #Sakeena_bint_al-Hussain https://t.co/zg6hnrtTXH	NIL	NIL	No_Hate
1617547122064211972	افغان دارالحکومت #کابل شہر میں برفباری کا خوبصورت منظر عشاء کے وقت ہلکی ہلکی برفباری نے شہر کو سفید چادر میں لپیٹ دیا https://t.co/xUVkDps8kh	A beautiful scene of snowfall in the Afghan capital #Kabul city A light snowfall wrapped the city in a white sheet at Isha https://t.co/xUVkDps8kh	NIL	NIL	No_Hate
1573968554885537793	وہ بھی کتنا باکمال وقت ہو گا جب لوگ مجھ پر مٹی پھینکنے کو بھی ثواب سمجھیں گے [ حبشی ] https://t.co/uX3W2Zlskf	What a wonderful time it will be when people will consider even throwing mud at me as a reward [Habshi] https://t.co/uX3W2Zlskf	NIL	NIL	No_Hate
1567765088693526529	امریکی بمبار طیارے کو دوران پرواز 6 سعودی لڑاکا طیاروں نے سکیورٹی فراہم کی https://t.co/BoEp6y4F5c https://t.co/FX4LP3sGMP	6 Saudi fighter jets provide security to US bomber during flight https://t.co/BoEp6y4F5c https://t.co/FX4LP3sGMP	NIL	NIL	No_Hate
1558854453817745408	عمران کنجر بھڑوے دلال کے کل والے مجرے میں اس کی ڈانسر کے پچھواڑے میں تماش بینوں نے کچھ زیادہ ہی تن دیا ہے جس سے بیچاری کے منہ دیکھنے والا ہے https://t.co/1rznqE7TP2	Imran Kanjar Bhadwe Dalal's episode of yesterday's episode of his dancer's backside has given viewers a bit too much to see the poor guy's face https://t.co/1rznqE7TP2	NIL	NIL	Hate
1593690834653814784	یہ ہے قبائل کا نمایندہ پختون پنجابی سندھی بلوچ کا نمایندہ پوری دنیا میں پاکستان کی پہچان عوام کی جان عمران خان، https://t.co/MqCJXU4lig	This is the representative of the tribes Pakhtun Punjabi Sindhi Baloch the representative of Pakistan in the whole world the life of the people Imran Khan, https://t.co/MqCJXU4lig	NIL	NIL	No_Hate
1587095372282961923	بخیل و کنجوس کا جنّت میں جانا مشکل ھو سکتا ھے https://t.co/j81QcfXVzi	It may be difficult for misers and misers to go to heaven https://t.co/j81QcfXVzi	NIL	NIL	No_Hate
1594190188812521472	لنگڑے کو ہی نہیں گیلے تیتر اور صدیق جان کو بھی تھپڑ پڑے ہیں پارٹی چل رہی تھی رات کہ 2 بجے وہاں پہ لنگڑا بلکل صیح تھا کسی نے کہا کہ خان صاحب آپ تو بلکل ٹھیک ہیں پھر لڑائی شروع ہوتی ہے گیلے تیتر اور صدیق جان کو بھی چھیڑیں بجتی ہیں اور فتنہ بلکل درست تھا لنگڑے والا ڈرامہ ہو رہا ہے https://t.co/yjcU3GQdrT	Not only Lamgade, Gale Tetar and Siddique John were also slapped. The party was going on. At 2 o'clock in the night, Lamgade was completely healthy. Someone said, "Khan Sahib, you are completely fine. Then the fight started, Gale Tetar and Siddique John There is also teasing and the temptation was completely correct. The lame drama is happening https://t.co/yjcU3GQdrT	بات صرف گھڑی کی نہیں یع زت دا ویر لا گی عوام کےاعاویس یپاک یکئی ٢ےمےے‏ 227 .ہت ول کو ال بنایاگیا 06 جب	It's not just about the watch Ya zat da veer will bring People's jobs can be divided into two categories 227 .to Hatville Made in 06 Jab	Hate
1558097614897307651	تیرے خون پر واویلا میرے خون پر خاموشی تو مسلمان کشمیر کا میں کافر بلوچستان کا #RedZoneSitInProtest https://t.co/TJv9ksZ5VK	Wawela on your blood Silence on my blood So Muslims of Kashmir I am an infidel of Balochistan #RedZoneSitInProtest https://t.co/TJv9ksZ5VK	0 4021	0 4021	Hate
1578042134149619713	ویرات کوہلی نے سنچری بنائی تو ہندوستان ایشیا کپ میں بھارت کی کارکردگی کو بھول گیا لیکن جب بابراعظم نے سنچری اسکور کی تو پاکستانی میڈیا ان کے اسٹرائیک ریٹ پر تنقید کرنے لگا۔چیئرمین پی سی بی رمیز راجا https://t.co/v8n4bDNzCg	When Virat Kohli scored a century, India forgot about India's performance in the Asia Cup, but when Babar Azam scored a century, Pakistani media started criticizing his strike rate. Chairman PCB Ramiz Raja https://t.co/v8n4bDNzCg	کہ ‎١‏ ٣ے‏ ٣۲۰ ٥(ا‎ !۶ ٤٤۱٢ 7 پاککعتا نکو پور ٹک ناما رے لیے بہت ض رو ری سے ا پٹھی لکیسعمتٹی پتقیدکر سے ہی یکن نام ےک رکھلا ڑیوں پرتتقی شک ی ںکیوکہ رانا ذاٹی متا سے چی رین بای پیا رمیزراجا	that 1 3 320 5 (a !6 4412 7 Pakkuta Niko Purtik Namare very urgently A Pithi Laksimatti Patqidkar is the same name One of the most progressive suspects is Rana Chi Ren Bai Pia Ramezraja from Jati Mata	No_Hate
1573236970104705025	نیویارک: پاکستان کے لئے ایک اور بڑا اعزاز، دنیا کے نوجوان وزرائے خارجہ کی کانفرنس کی سربراہی کے بعد وزیر خارجہ بلاول بھٹو زرداری نے تنظیم تعاون اسلامی کے وزرائے خارجہ کے اجلاس کی صدارت کی @BBhuttoZardari https://t.co/GuY9UJtTBP	New York: Another great honor for Pakistan, Foreign Minister Bilawal Bhutto Zardari presided over the meeting of Foreign Ministers of the Organization of Islamic Cooperation after chairing the conference of young foreign ministers of the world. @BBhuttoZardari https://t.co/GuY9UJtTBP	NIL	NIL	No_Hate
1595712558694113280	آخر کار احمد نورانی ایک بار جھوٹا ثابت ہوا مگر افسوس وہ آج بھی صحافی کہلایا اور پکارا جائے گا۔ انھی لوگوں کی وجہ سے صحافت کا شعبہ طوائف کے کوٹھے کی مانند ہوگیا ہے جہاں پیسہ اچھالا جاتا ہے تو قلم چلتے ہیں۔ #Noorani_Exposed #Noorani_Liar #Noorani_Absconder https://t.co/aePhmNx7mG	Finally, Ahmed Noorani was proved to be a liar, but alas, he is still called a journalist and will be called. Because of these people, the field of journalism has become like a brothel of prostitutes, where money is thrown and pens move. #Noorani_Exposed #Noorani_Liar #Noorani_Absconder https://t.co/aePhmNx7mG	NIL	NIL	Hate
1560072241865543680	@MoulanaOfficial ابلیس ڈیزل فضل الرحمان https://t.co/VYmQlCZy2E	@MoulanaOfficial Iblis Diesel Fazlur Rehman https://t.co/VYmQlCZy2E	NIL	NIL	Hate
1587719389264109568	@hinaparvezbutt لنعت تم پہ۔۔۔۔کمینی۔۔۔ https://t.co/LoyXKbR0Z1	@hinaparvezbutt damn you. https://t.co/LoyXKbR0Z1	NIL	NIL	Hate
1608294105842425857	بینظیر کی برسی کے موقع پر بلاول زرداری نے خود کو ننگا کر لیا۔ #چور_کھا_گئے_پاکستان https://t.co/gVLInxlSnz	On the occasion of Benazir's death anniversary, Bilawal Zardari exposed himself. #Chur_Kha_Gay_Pakistan https://t.co/gVLInxlSnz	کرٹ زددارگی کے سای ورپ انف زخدنے 007صص 0) یک قای کے زی ساب پر ورش پانے والامان کے مق کو ںکوونہ لڑوا کا بد ری روایا تکوپلال کر نے پ از لہ من کک خارجہ پا اور گیشت 71 س7 سیک انارپ تخل رے ےکاخوائش منر	Kurt Zadargi's Sai Warp Inf Zakhdne 007 pp. 0) A person who is blessed with the power of God Takupalal cried bitterly about the fight Karne pazla man kuk khare pa and gisht 71 Q7 Sec Anarap Takhil Ray's Khwaish Manar	Hate
1608848474434600961	خان جو کرنے کی ٹھان لیتا ہے وہ کرکے رہتا اور خان صاحب نے پاکستان کے بدبودار غلاظت اور سسٹم سے ٹکر لی ہے خان صاحب کا مقابلہ اب نواز ،زرداری سے نہیں انکو ہرا کر اب خان صاحب ان کے سہولتکار جو سسٹم میں گندے انڈے بیٹھے ہیں انکو تباہ برباد کرنا ہے #خان_ہماری_جان https://t.co/wvCHvWgkH1	Khan keeps doing what he decides to do and Khan Sahib has faced the smelly filth and system of Pakistan. Khan Sahib is now not fighting Nawaz, Zardari by defeating them, now Khan Sahib is their facilitator who is sitting dirty eggs in the system. They have to be destroyed #Khan_Humari_Jaan https://t.co/wvCHvWgkH1	NIL	NIL	Hate
1587502133426937857	منھوس قاتل کرائم منسٹر https://t.co/jISFjjKdcE	Monstrous killer crime minister https://t.co/jISFjjKdcE	کوئی رہ تو نہیں گیا جو منی لانڈرنگ کا گواہ هو اور زندہ بچ گیا هو _	No one left Be a witness to money laundering and survived	Hate
1615993838291800065	چاچا شکور نے ووٹ ڈالنے کے لیے اپنا شناختی کارڈ آگے بڑھایا اور پوچھا کہ کیا میری بیگم ووٹ ڈال گئی ھے ؟۔ ایجنٹ نے لسٹ چیک کرکے بتایا کہ ھاں جی وہ ووٹ کاسٹ کر گئی ھیں۔ چاچا شکورے نے ایک آہ بھری اور کہا کہ کاش چند منٹ پہلے آجاتا تو ملاقات ھو جاتی ۔ 😁🤣🤣😂 https://t.co/9srOj4uET3	Chacha Shakur forwarded his ID card to vote and asked whether my Begum has voted. The agent checked the list and said that yes, the vote has been cast. Uncle Shakure sighed and said that if he had come a few minutes earlier, the meeting would have been arranged. 😁🤣🤣😂 https://t.co/9srOj4uET3	NIL	NIL	No_Hate
1568805289456975872	پشین کلی ملکیار میں جے یو آئی تحصیل پشین زیر اہتمام شمولیتی پروگرام کے شرکاء سے جمیعت علماء اسلام بلوچستان امیر و وفاقی وزیر ہاؤسنگ مولناء عبدالواسع صوبائی نائب امیر و ایم این اے مولوی کمال الدین ضلعی امیر مولانا عزیزاللہ حنفی ممبر صوبائی اسمبلی حاجی اصغر خان ترین خطاب کررہے ہیں https://t.co/rKSHhOrrc8	Jamiat Ulema Islam Balochistan Amir and Federal Minister of Housing Maulana Abdul Wasi Provincial Deputy Amir and MNA Maulvi Kamaluddin District Amir Maulana Azizullah Hanafi Member of Provincial Assembly Haji Asghar Khan addressed the participants of the inclusion program organized by JUI Tehsil Pashin in Pashin village. Doing https://t.co/rKSHhOrrc8	NIL	NIL	No_Hate
1573222425336205314	شریف خاندان اور اس کی آنے والی سات گندی نسلوں کی نیندیں حرام کرنے والا مرد مجاہد......!!!!! https://t.co/Pr5lcUcLXt	The male Mujahid who has forbidden the sleep of the Sharif family and its coming seven filthy generations......!!!!! https://t.co/Pr5lcUcLXt	NIL	NIL	Hate
1606602056373964800	پرویز الہی کی بحالی کا فیصلہ مسترد، حکم امتناعی پر مکمل اختیار دینا ظلم، سپریم کورٹ سے ازخودنوٹس لے، وفاقی حکومت https://t.co/4tUSpRbpr8 https://t.co/JcHaCtMg2x	The decision to restore Parvez Elahi was rejected, it was cruel to give complete authority to the injunction, take notice from the Supreme Court, the federal government. https://t.co/4tUSpRbpr8 https://t.co/JcHaCtMg2x	۹ے ےہ ٭”!.طا ہ ‎۱٣+٠١‏ ب١1‏ 6 24329096 : ڈنا ‎۴۱٢٠٢٢٢۵۷۷‏ پروی الہ یکی بھال یکا فیصلیمست رد مم ا قناعی پرگل اختیار دناشلم ہپربیمکورٹ سے ازخووفوٹش نے ءوفاتی عکوصت	9 ٭”! Parvi ilaha yika bhal yika faisalimast rd mamma qaskani pargal akhtar Ezkhuvofotish from Dinashlam Hyperbeamcourt obituary	No_Hate
1578324452051296257	@Taimur_Ali_Syed @ShayanA2307 میں نے سنا ہے کہ بھنگ پینے والے کو بھی بھنگی ہی کہتے ہیں https://t.co/ArEHbDcuRY	@Taimur_Ali_Syed @ShayanA2307 I heard that Cannabis smoker is also called Bhangi https://t.co/ArEHbDcuRY	NIL	NIL	Hate
1560948270519697408	انسان جانور سے اس لحاظ سے مختلف ہے کہ وہ بغیر بھوک لگے کھاتا، بغیر پیاس کے پانی پیتا اور تمام موسموں میں جنسی عمل کرتا ہے۔ بیو مارکس https://t.co/nmUFOkFPdz	Man differs from animals in that he eats without hunger, drinks water without thirst and has sex in all seasons. Beau Marks https://t.co/nmUFOkFPdz	NIL	NIL	No_Hate
1580163963379396608	#ASP کینٹ علینہ راجپر کا ڈی آئی جی حیدرآباد پیر محمد شاہ کی ٹیم کے ہمراہ ٹنڈو محمد خان کے مشہور منشیات فروش اکبر لغاری کے اڈے پر کامیاب کروائی بڑی تعداد میں منشیات برآمد الحمدالله اے ایس پی کینٹ خیریت سے ہیں انکے خلاف یرغمال بنانے کی خبریں جھوٹی من گھڑت ہیں @AleenaRajper https://t.co/jDydfXaBvP	#ASP Cantt Alina Rajpar along with the team of DIG Hyderabad Pir Muhammad Shah successfully recovered a large quantity of drugs from the base of famous drug dealer Akbar Laghari of Tando Muhammad Khan. Alhamdulillah ASP Kent is doing well The news of taking hostages against them is a false fabrication @AleenaRajper https://t.co/jDydfXaBvP	26607 ت785 ۰۰ 8:42 811۱ 5 ۷۵ , ہل ٣م‏ 11:53 ,08/08/2021	26607 T785 00 8:42 8111 5 75 , Hull 3rd 11:53, 08/08/2021	No_Hate
1565255496176746501	@MaryamNSharif انجلینا جولی کے بعد پیش خدمت ہے پرنسز kat.😬 ایک ہوتا ہے کاپی پیسٹ۔ ایک ہوتا ہے کاپی پیسٹ مافیا۔ پھر ہوتا ہے انٹر نیشنل کاپی پیسٹ مافیا۔ https://t.co/KzWoZZ1EGq	@MaryamNSharif After Angelina Jolie, Princes kat.😬 One is copy paste. One is the copy paste mafia. Then there is the international copy paste mafia. https://t.co/KzWoZZ1EGq	NIL	NIL	Hate
1565749422180409345	پاک فوج سے کزارش ہے اس کو کسی میزائیل کی ساتھ باندھ کر بھارت کی طرف چھوڑ دیا جائے۔ https://t.co/O1MiSITRKD	Pakistan Army is concerned that it should be tied to a missile and released towards India. https://t.co/O1MiSITRKD	پر روڑ زیادہ خط راک 0 جا رہا بھولء عمران غان	On the road more letter Rock 0 Forget Imran Ghan	Hate
1594145998569349125	میرے پیارے قائد الطاف حسین تیرا ہے ساتھ تو سب منزلیں ہماری ہیں۔۔!! جئے مہاجر جئے الطاف حسین #AltafNeedsJustice @AltafHussain_90 @OfficialMqm https://t.co/dl9nJZQ2uR	My dear Quaid Altaf Hussain You are with me So all destinations are ours!! Jai Mahajir Jai Altaf Hussain #AltafNeedsJustice @AltafHussain_90 @OfficialMqm https://t.co/dl9nJZQ2uR	ج بعسساسسسسئ بج جےے۔‌_-_-	বাসাসাসাস্বে বেজ জায়্য.	No_Hate
1617592569655099392	قرآن پاک کی بے حرمتی انتہائی گھناؤنا اور ناقابل برداشت عمل ہے، حافظ سعد رضوی عالمی برادری ، او آئی سی گھناؤنے عمل کے حوالے سے عالمی سطح پر بھر پور آواز بلند کرے،حافظ سعد رضوی امت مسلمہ کو اسلاموفوبیا کے خاتمے کیلئے اجتماعی کاوشوں کی ضرورت ہے، #Infidel_stopGlobalTerrorism https://t.co/6T8vBCbW3w	Desecration of the Holy Qur'an is a very heinous and intolerable act, Hafiz Saad Rizvi The international community, the OIC should raise its voice at the global level regarding the heinous act, Hafiz Saad Rizvi. The Muslim Ummah needs collective efforts to eradicate Islamophobia. #Infidel_stopGlobalTerrorism https://t.co/6T8vBCbW3w	NIL	NIL	No_Hate
1568114966368079872	درود شریف ایک ایسی عبادت ہے⁦ جو زمین میں گمنام رہنے والوں کو آسمان میں معروف بنا دیتی ہے✨ اللهم صل علی سيدنا و مولانا محمد و علی آله و صحبه و بارک وسلم ⁦♥️⁩ #JummahMubarak #Gosha_e_Darood #MinhajulQuran https://t.co/GSYOvHLXc8	Durood Sharif is one such worship Who makes the anonymous on earth famous in heaven O Allah, peace and blessings be upon Ali Sayyiduna and Maulana Muhammad and his family and companions and blessings and peace ♥️ #JummahMubarak #Gosha_e_Darood #MinhajulQuran https://t.co/GSYOvHLXc8	NIL	NIL	No_Hate
1572264591576698881	وزیراعظم شہباز شریف اور فرانسیسی صدر کے درمیان ملاقات یہ بوسڑی کے تحریک لیبیک والے کہاں گٹر برد ہوگئے۔ https://t.co/8pmlALMDu7	Meeting between Prime Minister Shehbaz Sharif and French President Where did the people of Bosari's movement go to the gutter? https://t.co/8pmlALMDu7	NIL	NIL	Hate
1558461317127831552	پاکستان کے بننے میں بھی شیعہ سنی کردار تھا اور پاکستان کے تحفظ اور بقا کے لیے بھی شیعہ سنی اتحاد ضروری ہے۔ قائد شہید علامہ عارف حسین الحسینی #پاکستان_عطائے_پنجتنؑ 'Hussainio Ka Pakistan' 'Sadqa e Panjetan' https://t.co/xL8zOquEmQ	Shia-Sunni had a role in the creation of Pakistan and Shia-Sunni unity is also necessary for the protection and survival of Pakistan. Quaid Shaheed Allama Arif Hussain Al Hussaini #Pakistan_Atay_Panjtan 'Hussainio Ka Pakistan' 'Sadqa e Panjetan' https://t.co/xL8zOquEmQ	NIL	NIL	No_Hate
1618627340006838272	مغربی کنارے میں صیہونی فوج کی فائرنگ سے 9 فلسطینی شہید ہوگئے۔ Readmore:https://t.co/zHdZKIo418 #israel #Palestine #muslim https://t.co/Ov0Dl7TABo	9 Palestinians were martyred by the Zionist army's firing in the West Bank. Read more: https://t.co/zHdZKIo418 #israel #Palestine #muslim https://t.co/Ov0Dl7TABo	NIL	NIL	No_Hate
1608512961836089347	@HamadYasir10 @Jooookeeeerrrr @MrHunt65216859 @officialAsifpti @lalamurtaza251 @Lalika79 ٹٹے اٹھانے اور شو پالش کرنے والوں کا عالمی گروہ https://t.co/wyYWMsJHAK	@HamadYasir10 @Jooookeeeerrrr @MrHunt65216859 @officialAsifpti @lalamurtaza251 @Lalika79 Global group of pickers and shoe polishers https://t.co/wyYWMsJHAK	NIL	NIL	Hate
1581169872259514368	رشتے دار: بیٹا لگتا سارا دن موبائل استعمال کرتی ہو 😒 لے پھر ڈھیٹ میں: نہیں ساری رات بھی 😑😬😂 #اردو_زبان #دیارِ_سُخن https://t.co/zUbWOTLtAR	Relative: Son, you seem to be using your mobile phone all day 😒 Take it boldly: No, even the whole night 😑😬😂 #Urdu_Language #Diyaar_Sukhin https://t.co/zUbWOTLtAR	NIL	NIL	No_Hate
1580135294736617474	چاہتی ہـے لاکھ قابو دل پہ پاتی ہی نہیں ہائے رے ظالم جوانی بس میں آتی ہی نہیں https://t.co/ypRglnquad	She wants a million, but she can't control her heart Hey, cruel youth just doesn't come https://t.co/ypRglnquad	NIL	NIL	No_Hate
1592757694670442497	*سعودی عرب مکہ مکرمہ میں قائد کراچی مولانا رب نواز حنفی صاحب اور قائد اہلسنت حضرت علامہ مولانا محمداحمد لدھیانوی صاحب ایک ساتھ موجود* https://t.co/58wvj8U7Od	* Leader of Karachi Maulana Rab Nawaz Hanafi Sahib and Leader of Ahle Sunnah Hazrat Allama Maulana Muhammad Ahmad Ludhianvi Sahib present together in Saudi Arabia Makkah Mukarramah * https://t.co/58wvj8U7Od	NIL	NIL	No_Hate
1573226489717620737	سلور بیری👇 یہ عام طور پر گرم،خشک سے نم ریتیلی اور بجری والی مٹی میں اگتا ہے۔ یہ ہر قسم کی مٹی یا موسمی حالات میں بہت اچھی طرح اگتا.پھل کے طور پر بھی کھایا جاسکتا اور ٹماٹر کے متبادل سالن میں بھی استعمال کیا جاسکتا ہے۔ ذائقہ مسالہ دار اور میٹھا ۔ یہ کھانے میں بہت لذیذ ہے. https://t.co/LyTBJdz3bE	Silverberry It usually grows in warm, dry to moist sandy and gravelly soils. It grows very well in all types of soil or climatic conditions. It can also be eaten as a fruit and used in curries as an alternative to tomatoes. The taste is spicy and sweet. It is very delicious to eat. https://t.co/LyTBJdz3bE	NIL	NIL	No_Hate
1563584901156569088	پاکستان میں فحاشی اور عریانی پھیلانے والی نام نہاد این جی اوز کہاں گئی ؟ #عوام_کاسہارابنو_لبیک_کاساتھ_دو https://t.co/WFS2acMdpG	Where did the so-called NGOs spreading obscenity and nudity in Pakistan go? #Awam_Kasharabno_Labik_Kasath_Do https://t.co/WFS2acMdpG	NIL	NIL	No_Hate
1560137404899622912	@S_iftikharBaloc اگلی دفعہ میں سردار افتخار خان بلوچ صاحبزادہ حافظ سعد کو اس سے بھی اچھی گاڑی پر جلسہ گاہ لاؤں گا ان شاءاللہ ۔ پھر کیا کرو گے بلکہ آج سے اعلان ہے ہر ریلی میں ہر دفعہ نئ اور مہنگی گاڑیاں قیادت کے حوالے کریں گے ۔اب ہضم کرو یوتھیو https://t.co/tEqvXqWv7v	@S_iftikharBaloc Next time I will bring Sardar Iftikhar Baloch Sahibzada Hafiz Saad to the meeting place in a better car, God willing. What will you do then, but it has been announced from today that new and expensive vehicles will be handed over to the leadership in every rally.	NIL	NIL	No_Hate
1567936036788903940	کاش کسی کو اِن ماوں کا درد کا احساس ہو۔ اور اِن ماوں کو انکی خوشیاں لوٹا دے۔ #RedZoneSitInProtest #StopBalochGenocide @ImaanZHazir @hrw @amnesty @amnestysasia @RanaSanaullahPK https://t.co/hy0sjtEGtH	I wish someone could feel the pain of these mothers. And return their happiness to these mothers. #RedZoneSitInProtest #StopBalochGenocide @ImaanZHazir @hrw @amnesty @amnestysasia @RanaSanaullahPK https://t.co/hy0sjtEGtH	NIL	NIL	No_Hate
1566735374763937794	تگران میں دہشت گردوں کا سیکیورٹی فورسز کی چوکی پر حملہ، فورسز کی بھرپور جوابی کاروائی کے بعد بزدل دہشتگرد بھاگ کھڑے ہوئے، اس واقعہ میں کوئی جانی و مالی نقصان نہیں ہوا، فرار دہشتگردوں کی تلاش کے لئے ارد گرد کے علاقوں میں سرچ آپریشن شروع کر دیا گیا ہے https://t.co/qugzNm7vSt	Terrorists attacked the security forces post in Tagran, the cowardly terrorists ran away after a strong response by the forces, there was no loss of life or property in this incident, a search operation was started in the surrounding areas to find the escaped terrorists. Done https://t.co/qugzNm7vSt	ار یں رت" 0 تگران فورسز کی چوکی پر مسلح افراد کا حملہ	"I'm sorry." 0 Armed men attacked the post of Tigran forces	No_Hate
1566873745200914435	دلِ مضطرب 🖤 کوئی اسم ہو جسے پڑھ کے کم ہو ملالِ جاں جسے پھونک کر ذرا کم لگیں یہ خانۂ دل کی اُداسیاں.....🍂 #illusive https://t.co/OUoHVzxzqi	Troubled heart Be a noun Which makes you less bored by reading Blow it a little less This is the sadness of the heart.....🍂 #illusive https://t.co/OUoHVzxzqi	NIL	NIL	No_Hate
1561749098948136960	#سراج_الحق_سیلاب_زدگان_کےساتھ سراج الحق صاحب نے جنوبی پنجاب کے سیلاب سے تباہ ہونے ولے علاقوں کا دورہ کیا ہر موقع کی طرح اس وقت بھی الخدمت امدادی سرگرمیوں میں مصروف ہے https://t.co/C7qhwkNm9L	#Siraj_ul-Haq_with_Selab_Zadagan_ Siraj-ul-Haq Sahib visited the flood-ravaged areas of South Punjab. Al-Khidmat is engaged in relief activities like every other time. https://t.co/C7qhwkNm9L	NIL	NIL	No_Hate
1573884040054247426	مغرب کی جنت سے ایک پانچ فٹ سات انچ کی حور خلاف قانون جنت سے نکل کر ہمارے جہنم میں آئی تھی زبان نہیں سمجھ سکتی درد سمجھ رہی تھی رو بھی رہی تھی، یہ قہر سے ڈوبا دیس کبھی جنت ہوا کرتا تھا اس نے واپس جاکر بتایا!! سب جہنمی بے قصور تھے ان کے خداؤں سے غلط فیصلے ہوئے ہیں ⬇️ https://t.co/sJteX8Du2s	From the Paradise of the West A five feet seven inches tall Out of heaven against the law She came to our hell Can't understand the language She understood the pain was also crying This country was filled with anger There used to be heaven He went back and told!! All the hellish were innocent From their gods Wrong decisions have been made ⬇️ https://t.co/sJteX8Du2s	NIL	NIL	No_Hate
1578830974498263041	نوجوانوں کو جنین مہاجر کیمپ میں نشانہ بنایا گیا https://t.co/awDFsqJpca #SamaaTV #Israel #israeliforces #palestine https://t.co/JGUqghjJNK	The youth were targeted in the Jenin refugee camp https://t.co/awDFsqJpca #SamaaTV #Israel #israeliforces #palestine https://t.co/JGUqghjJNK	مقبوض مغ یمکزار ےی اس رانک فو رسکی فائرنگ سے دفلسلنی شید 11زشی	The firing of this rank force in the occupied Mughal area From Dflslni Shed 11zshi	No_Hate
1581544291352326144	جوش جذبہ جنون لالٹین تباہ دے ایمل ولی بھڑوا دے نیوٹرل ہیجڑا دے #نکلو_مافیا_کے_خلاف https://t.co/8swxbAoWH5	enthusiasm passion Madness Destroy the lantern Emil Willi Bhurada Give neutral eunuch #get_against_the_mafia https://t.co/8swxbAoWH5	NIL	NIL	Hate
1606552800929861632	راہِ تخلیق میں تکمیلِ شُغل ہونے تک خاتونِ اول ہونے سے خاتونِ چوّل ہونے تک https://t.co/wIDeUDS8gg	Until the completion of employment in the path of creation From First Lady to First Lady https://t.co/wIDeUDS8gg	NIL	NIL	Hate
1593126141862506497	ن لیگ بلکہ نااہل نکمی ناکارہ لیگ کے قیمتی اثاثے جو اس پر ہی بھاری پڑ گئے نقل مارنے کے لیئے بھی عقل کی ضرورت ہوتی ہے اور کھاؤ پریوار کے پاس سب کچھ ہے دولت ہے اقتدار ہے بکاؤ دانشور اور ضمیر فروش صحافیوں کی فوج بھی ہے مگر"عقل" نہیں ہے اگر عقل ہوتی یہ کم عقل اتنے زیادہ ذلیل نہ ہوتے https://t.co/9Wa6pWvXv2	The valuable assets of the PML-N, rather the incompetent, incompetent and inefficient league, which fell heavily on him, also require intelligence to copy and eat. Khao Parivar has everything, wealth, power, and there is also an army of intellectuals and conscientious journalists. There is no "intellect" If there was intelligence, these less intelligent people would not be so humiliated	NIL	NIL	Hate
1563190132110675971	چہرے بدلنے سے نظام نہیں بدلے گا، تینوں جماعتیں بڑے بڑے دعوے کر کے اقتدار میں آئیں، مگر کوئی بہتری نہ لا سکیں، حقیقی تبدیلی قرآن و سنت کا نظام لانے سے آئے گی۔ جماعت اسلامی چاہتی ہے کہ چوکیدار بدلنے کی بجائے نظام کو بدلا جائے۔ امیر جماعت اسلامی سراج الحق #امیدکاعنوان_جماعت_اسلامی https://t.co/EXom79LrIr	Changing the face will not change the system, the three parties came to power with big claims, but could not bring any improvement, the real change will come by bringing the system of Quran and Sunnah. Jamaat-e-Islami wants to change the system instead of changing the watchman. Amir Jamaat-e-Islami Siraj-ul-Haq #امیدکاتون_Jamaat_Islami https://t.co/EXom79LrIr	یو چائتیں دڑےۓ پٹ چو ےگ کےا ینا ری نیس یکرک کی یی ن کین یق تد بی ق رن وسنتکانظام لانے ےآ ۓےگی۔ جھماعست اسلائی جا تی کہ چوکیرار بد لل کی بچائے نظام‌کوبدلاجائے۔	U chaitin ddeye pit chog ke ena renais ekrik ki yi nik ken Yaqtd will come to bring the system of running and collecting. Jhamast is asked to save Chowkirar Bad Lal Change the system.	No_Hate
1596886535655153665	بلوچ سیاسی استاد ڈاکٹر کہور خان بلوچ کے ساتھ آخری سیلفی۔۔۔!!! 30 اکتوبر 2021 نیشنل پارٹی چھٹی قومی کانگریس کوئیٹہ https://t.co/CzgCSG16H7	Last selfie with Baloch political teacher Dr. Kahoor Khan Baloch!!! 30 October 2021 National Party Sixth National Congress Quetta https://t.co/CzgCSG16H7	NIL	NIL	No_Hate
1573742860855230464	افسوس ناک خبر لیہ/کوٹ سلطان کے سینئر صحافی سیکرٹری پریس کلب کوٹ سلطان عبداللہ نظامی اور انکی بیوی کا مظفرگڑھ پٹھان ہوٹل کے قریب دن دیہاڑے قتل، اس واقعہ کی جتنی مزمت کی جائے کم ہے اس واقعہ کے مجرمان کو پولیس جلد از جلد ایکشن لیکر گرفتار کرے سب لوگ آواز اٹھائیں https://t.co/3O92mfcDW6	Sad news Leh/Kot Sultan Senior Journalist Secretary Press Club Kot Sultan Abdullah Nizami and his wife were murdered in broad daylight near Muzaffargarh Pathan Hotel. The police should take action and arrest the culprits of this incident as soon as possible Shout out everyone https://t.co/3O92mfcDW6	NIL	NIL	No_Hate
1573236521611689984	سنده کے جدید ہسپتال جہاں پر نواز شریف اور زرداری کے علاج کی سہولت موجود ہے https://t.co/rVZqNgPMeQ	Sindh's modern hospital where Nawaz Sharif and Zardari are treated https://t.co/rVZqNgPMeQ	NIL	NIL	No_Hate
1563487924066594817	فریاد حسین کے قتل پر اہل خانہ سے شاہ کمال آبادی میں تعزیت کی،بیٹی کے سسرال میں روزانہ کی لڑائی سے غریب خاندان پریشان تھا،فریاد حسین بیٹی کو بسائے رکھنے کیلئے بہن کے گھر منت سماجت کیلئے گئے مگر ز دو کوب کا نشانہ بنے موقع پر موت واقع ہو گئی،پریشان خاندان کی مکمل سرپرستی کریں گے https://t.co/Kk3hkyvYpD	Condolences were sent to the family in Shah Kamalabadi for the murder of Faryad Hussain. The poor family was worried about the daily fight in the daughter's in-laws. But the death occurred, will fully support the worried family https://t.co/Kk3hkyvYpD	NIL	NIL	No_Hate
1593485239573270529	جلسوں میں احتساب کی بڑی بڑی باتیں کرنے والا ثاقب ناسور کا صادق و امین نیازی اب ہمت کر کہ خود نیب کو رسیدیں دکھائی اور خود پر لگے الزام کو غلط ثابت کرے #رسیدکڈنیازی https://t.co/ZphI5xRT5Q	Sadiq and Amin Niazi of Saqib Nasor, who talk big about accountability in meetings, now dare to show the receipts to NAB and prove the accusation against him wrong. #رسيدكدنيازي https://t.co/ZphI5xRT5Q	12 مہ +ہ ۰ مھ رز 2 71 سسہ لہ مارؾن 2019 می ں ھڑی ٹروخت ہوں | 27 7 ہیں 7 ۸ ہہ 7۸ +ہ 6 ‎ -01‏ کھھ 0 2 سے ر- رع ”می 20 1 7 ڈا کی 1 اینارج رکرہ مرور ح 7 ٭+٭ 2 32 ٭+٭ یں کک رن رع لا ڑا نے وصول 2	12 Months + 0 Months 2 71 I am very excited for Sassa La Marathon 2019 27 7 are 7 8 H 78 + H 6 -01 x 0 2 to R-Ra” May 20 1 7 Da Ki 1 Enerj Rukra Muror H 7 *+* 2 32 *+* Cook Ran Ra La Ra received 2	Hate
1586865483264958464	فتنہ نازی پاگل یے۔ اس سے بھلے کی امید رکھنا بھی پاگل پن یے۔۔ https://t.co/KJAqDfPrfn	Fitna Nazi crazy. It is crazy to hope for the best. https://t.co/KJAqDfPrfn	NIL	NIL	Hate
1599001104812978176	@iFazliGhafoor موجودہ دور کے فتنہ شیطان کا سر کچلنا اب عوام کی ذمہ داری ہے۔ ڈیزل حرامی اسرائیلی ایجنٹ ہے آور گستاخ رسول کا مرتکب ہے۔ تمام عالم دین اس بات پر متفق ہیں https://t.co/mqvlW4OaaE	@iFazliGhafoor It is now the responsibility of the people to crush the head of the present-day temptation Satan. Diesel Harami is an Israeli agent, the perpetrator of our insolent messenger. All religious scholars agree on this https://t.co/mqvlW4OaaE	NIL	NIL	Hate
1613552493132136449	میرا ووٹ ان کے لیئے نہیں جنہوں نے ملک لوٹا میرا ووٹ ان کے لیئے نہیں جنہوں نے نظام مصطفیﷺ پر ڈاکا ڈالا میرا ووٹ اب صرف اور صرف پاکستان کے لیے عوام کے لئے اور نظام مصطفیﷺ کے لیئے #KARACHI_TLP_KA https://t.co/yME0vp2RED	My vote is not for those who looted the country. My vote is not for those who robbed Nizam Mustafa My vote now is only for Pakistan, for the people and for Nizam Mustafa #KARACHI_TLP_KA https://t.co/yME0vp2RED	NIL	NIL	No_Hate
1578789671932497921	تاخیر سے دیا گیا جواب گفتگو کے لطف کو قتل کر دیتا ہے۔#urdupoetry https://t.co/Tszq2OdVyB	A delayed response kills the fun of a conversation. #urdupoetry https://t.co/Tszq2OdVyB	NIL	NIL	No_Hate
1595247153794134018	چین میں سبزیوں کی برآمدات کے بروکر https://t.co/fPBhHMCcY3 https://t.co/b3U1Eb2KTR	Vegetable Export Brokers in China https://t.co/fPBhHMCcY3 https://t.co/b3U1Eb2KTR	NIL	NIL	No_Hate
1578042563969572864	@Nasirjaral2 مجھے تو لگتا ہے پٹواریوں کو پھر سے آلو بنانے کی کوشش کی جارہی ہے یا پٹواری پیدائشی گدھے ہے https://t.co/ZTbjqGJGLC	@Nasirjaral2 I think patwaris are trying to be made potatoes again or patwaris are born donkeys https://t.co/ZTbjqGJGLC	ےگ : ( ے لف : فظ اتال کر ‎١‏ اس اھ کی ںک رح گر عرار ع غاز ۶ ہے ادس جم ےنلنہے سے وز و	Yeh : (Luff : By pronouncing the word 1. This is the reason why Arar Aghaz 6 is It's freezing From	Hate
1573733094745640960	@RJ295c @Shazibali78 @shafqatmm1 @RoymukhtarRoy @GaziAmirGujar @DurraniViews @AMRzvia @HiDr_111 @QamarSh57186587 @Wicky_1122 @GulbhrQadri @RealFarooqi @jarral95 @Brand__Rao @Bilalrizvi348 @G_Bhai5 یہ والا کھسرا بھی شامل کر لیتے 😂😂😂😂😂😂 https://t.co/HtRBTWIeh0	@RJ295c @Shazibali78 @shafqatmm1 @RoymukhtarRoy @GaziAmirGujar @DurraniViews @AMRzvia @HiDr_111 @QamarSh57186587 @Wicky_1122 @GulbhrQadri @RealFarooqi @jarral95 @Brand__Rao @Bilalrizvi348 @G_Bhai5 would have included this one too. 😂😂😂😂😂😂 https://t.co/HtRBTWIeh0	NIL	NIL	Hate
1563156172529877000	@HinaMehwish6 ہم بھی چٹنی بنانے لگے بریانی تیار ہو ریی ہے https://t.co/i9wXqRmlAC	@HinaMehwish6 we also started making chutney Biryani is ready https://t.co/i9wXqRmlAC	NIL	NIL	No_Hate
1562375112447475712	#حالیہ بارشوں کی وجہ سے شری احمد شاہلانی کی تین مکان کی چھت گیر گیا اور ایک چھت کی گرنے میں ایک بچہ بھی زخمی ہوا اور کافی سامان کی نقصان ہوا ہیں اور ڈی سی صاحب سے اور اے سی صاحب سے اور قدوسبزنجو سے اپیل کرتے ہوئے کہ ٹینٹ اور تمبو وغیرہ دینے کی اپیل کرتے ہیں فون نمبر 03369348517 https://t.co/0gNkXpHGqS	#Due to the recent rains, the roof of three houses of Shri Ahmad Shahlani collapsed and a child was also injured in the collapse of one roof and a lot of property has been damaged and appealing to DC Sahib and AC Sahab and Quddus Bazanjo. That they appeal to give tents and tambu etc Phone number 03369348517 https://t.co/0gNkXpHGqS	NIL	NIL	No_Hate
1606888946021322755	'#بھارت، #قازقستان کی فوج' کی مشترکہ فوجی مشقیں '#KAZIND' دو طرفہ تعلقات کو فروغ دیں گی' @adgpi https://t.co/7e1VrQnIBW @MilapNN #India #Kazakhstan https://t.co/L1e1jDFcQR	'#India, #Kazakhstan' joint military exercise '#KAZIND' will boost bilateral ties' @adgpi https://t.co/7e1VrQnIBW @MilapNN #India #Kazakhstan https://t.co/ L1e1jDFcQR	NIL	NIL	No_Hate
1608847117841498114	آج ڈیرہ بگٹی روڈ میں میرے کزن کے گاڈی کا ایکسیڈنٹ ہوا ہے الحمدللہ کوئی جانی نقصان نہیں ہوا https://t.co/gzGhJubc7X	Today, my cousin's car met with an accident in Dera Bugti Road. Alhamdulillah, there was no casualty https://t.co/gzGhJubc7X	NIL	NIL	No_Hate
1573616142173749248	اسد عمر نے کہا کہ امپورٹڈ حکومت نے نیب کے قانون میں ترمیم کے ساتھ این آراو ٹو لیا، ان کو لگتا ہے کہ ان کے سینکڑوں اربوں کے کیسز ختم ہوجائیں گے، ان کے کرپشن کی قیمت عوام مہنگے پیٹرول ، ڈیزل اور ہوش ربا بجلی کے بل کی شکل میں ادا کررہی ہے۔ https://t.co/jSPIE1lHsb https://t.co/HSczAzJcPZ	Asad Umar said that Imported government took NRAO 2 with the amendment of NAB law, they think that their hundreds of billions of cases will end, the price of their corruption will be paid by the people in the form of expensive petrol, diesel and usurious electricity bills. is doing https://t.co/jSPIE1lHsb https://t.co/HSczAzJcPZ	سابق وفاقی وزیر اسد عمر	Former Federal Minister Asad Umar	Hate
1563517616991322114	عادل تاریخ گواہ ہے کہ جس نے بھی پاک فوج سے بغض رکھا وہ ذلیل ہی ہوا۔ اس لیے عادل راجہ پاک فوج کی دشمنی میں اتنا ہی آگے جاؤ جتنا برداشت کر سکو۔ #AdilGhaddarRaja https://t.co/m4cxvJo5NE	Adil history is a witness that whoever harbored a grudge against Pakistan Army was humiliated. Therefore, Adil Raja, go as far as you can bear in the hostility of Pak Army. #AdilGhaddarRaja https://t.co/m4cxvJo5NE	بکوڑا عادل راجہ ملک سے بھاگگیا اور النیلیڑ مس ہی کر اناج پاکتتان کے خلاف وپی زبان بول رہاے جھ لک دشن حخناصر أاسے ہداب تکمرتے ہیں	Adil Raja of Bakora ran away from the country and Al-Niliyd Miss They are speaking against the Pakatan Harapan Lak Dashan Hakhnasir calls it Hadab	Hate
1607819601336832007	ڈاکٹر : کیا کھایا تھا؟ لڑکی : جی برگر، فرینچ فرائز، پیزہ اور کوکا کولا ڈاکٹر : غصے سے! یہ وٹس ایپ نہیں ہے سچ بتاؤ۔ لڑکی: جی ٹینڈے🙃🤣🤣🤣🤣 https://t.co/lnfLBNZVPg	Doctor: What did you eat? Girl: G Burger, French Fries, Pizza and Coca Cola Doctor: Out of anger! This is not WhatsApp tell the truth Girl: Ji Tende🙃🤣🤣🤣🤣 https://t.co/lnfLBNZVPg	NIL	NIL	No_Hate
1568948988275208193	مجھ سے اکثر پوچھا جاتا ہے کے پاکستان کا طرز حکومت کیا ہوگا ؟ پاکستان کے طرز حکومت کا تعین کرنے والا میں کون ہوں مسلمانوں کا طرزِ حکومت اج سے13 سو سال پہلے قران مجید نے وضاحت کے ساتھ بیان کر دیا الحمدوللہ قران پاک ہماری رہنماہی کے لیے موجود ہے قیامت تک رہے گا #TLP_Promotion https://t.co/zvR6hvPnVr	I am often asked What will be the style of government of Pakistan? Who am I to determine the style of government of Pakistan? The style of government of the Muslims was explained clearly by the Quran 13 hundred years ago. Alhamdulillah, the Holy Qur'an is there for our guidance and will remain until the Day of Judgement #TLP_Promotion https://t.co/zvR6hvPnVr	NIL	NIL	No_Hate
1564836272346103810	بھوک مداری کو لگتی ہے ناچنا بندر کو پڑتا ہے ۔۔ یہی حال میرے وطن کا ہے،،،،مشکل فیصلے ۔۔۔۔۔۔کرتی ہے، بھگتنا غریب کو پڑتا ہے https://t.co/VxGNfyrUb8	A monkey feels hungry, a monkey feels like dancing. This is the situation of my country,,, makes difficult decisions, the poor have to suffer https://t.co/VxGNfyrUb8	NIL	NIL	Hate
1564941173701201921	@hinaparvezbutt یہ وہ خاتون ہے جو ماں کی قبر پر جانے سے پہلے بھی پارٹی میک اپ کرتی تھی اور برینڈڈ سوٹ و جیولری پہننے کے بعد فوٹو گرافر ساتھ لے جانا نہیں بھولتی تھی، بانو آپا نے راجہ گدھ میں لکھا تھا کہ رزق حرام انسانی جینز تک کو تباہ کر دیتا ہے اور ہم دیکھ رہے ہیں کہ بانو آپا نے سچ لکھا تھا !! https://t.co/reRwCngpRg	@hinaparvezbutt This is the woman who used to do party make-up even before going to her mother's grave and after wearing branded suits and jewelery did not forget to take a photographer with her. destroys the And we see that Bano Apa wrote the truth!! https://t.co/reRwCngpRg	NIL	NIL	Hate
1566688392766799873	چونکہ پاکستان سیلاب کی تباہ کاریوں کی زد میں ہے چنانچہ ہمارےلوگوں کو عالمی ماحولیاتی تغیرات کہ جنکےنتیجےمیں خشک سالی سراٹھاتی ہےتوکبھی سیلاب آتےہیں،کےتباہ کن اثرات کو سمجھنا ہوگا۔ لازم ہے کہ ہم جنگلات، ذخائرِآب، بیراجز اور گندے پانی کی صفائی کےمنصوبوں کے ذریعے اپنے ماحول میں https://t.co/anpHtkNLrQ	As Pakistan is under the ravages of floods, our people have to understand the devastating effects of global climate change that results in droughts and floods. It is necessary that we protect our environment through forests, reservoirs, dams and wastewater treatment projects https://t.co/anpHtkNLrQ	NIL	NIL	No_Hate
1573962540773679105	@Karachi__Wali خبردار جو کسی نے ہمیں زبردستی غم وغصہ دلانے کی کوشش کی غصہ ہمیں غیرت دلانے پر آتا ہے ذلیل و رسواء کرنے پر نہیں https://t.co/VXBxBa8QiU	@Karachi__Wali Beware whoever tried to force us to grieve Anger comes to honor us not to humiliate us https://t.co/VXBxBa8QiU	NIL	NIL	Hate
1568108645786828800	کیا انار کا استعمال ذیابیطس سے بچاؤ میں اہم کردار ادا کرتا ہے؟ https://t.co/xdXyNiwNBd #diabetes #suchtv https://t.co/QartWk8v19	Does the consumption of pomegranate play an important role in preventing diabetes? https://t.co/xdXyNiwNBd #diabetes #suchtv https://t.co/QartWk8v19	کا ول یپیٹس سے با میں نمس ام گروار اوا کرت ے؟	Ka wil ipates to ba in nims um Garwar or Karte?	No_Hate
1566721656319578115	دشمنی دوستی اور محبت میں اتنا شدت پسند تو ہونا بنتا ہے کہ جو آپ کا ہو وہ کسی اور کا نہ ہو 🙌🏻🔥 https://t.co/Ohf7FPfuPu	Enmity, friendship and love have to be so extreme that what is yours is not anyone else's 🙌🏻🔥 https://t.co/Ohf7FPfuPu	NIL	NIL	No_Hate
1608922246596419586	تحریک انصاف جہانیاں کیجانب سے #الیکشن_کراؤ_ملک_بچاؤ ریلی کا انعقاد کیا گیا جس میں اہلیان جہانیاں، وکلاء برادری،صحافی برادری،اور خواتین نے بھرپور شرک کی۔ @PTISPOfficial @PTIKWLOfficial #الیکشن_کراٶ_ملک_بچاٶ https://t.co/jBiIoLpYM9	Tehreek-e-Insaf Jahanian on behalf of #Alekshin_Krao_Mulk_Bachao The rally was organized in which the people of the world, the lawyers community, the journalist community, and women participated in full. @PTISPOfficial @PTIKWLOfficial #الیکشن_کراـــــــــــــــــــــــــــــــــــــــــــــــ, https://t.co/jBiIoLpYM9	NIL	NIL	No_Hate
1578386451749904386	@ovaismangalwala تسلی بخش ٹتے چُک حرامی https://t.co/BCbp4XnU8f	@ovaismangalwala Satisfying Tate Chuk Harami https://t.co/BCbp4XnU8f	NIL	NIL	Hate
1566702821344419841	ایسا منحوس ہے جب سے ملک پہ مسلت ہوا ہے کوئی اچھی خبر نہی ملی #ریاست_کا_دشمن_عمران_فتنہ https://t.co/YMf4qc7HjQ	It is unfortunate that there has been no good news since the country was attacked #Riyast_Ka_Dashman_Imran_Fitnah https://t.co/YMf4qc7HjQ	توسو چودجال کے مت سے سے ےفو یر ےکا آ کا مسلمان |7 کے کک سن کن	Don't be a jerk From the beginning to the end Aa's Muslim |7k Listen to the kick	Hate
1613255086091939841	عورت کی آدھی خوبصورتی اسکے چہرے میں ہوتی ہے اور باقی آدھی اسکے مموں میں ہوتی ہے.... https://t.co/uCkvXQUTDR	Half of the beauty of a woman is in her face And the other half is in his mums... https://t.co/uCkvXQUTDR	NIL	NIL	Hate
1592925600284839936	لکی مروت میں پولیس وین پر دہشت گرد حملہ اور اس میں چھ پولیس والوں کی شہادت پختونخوا میں دہشت گرد راج کا واضح ثبوت ہے۔ صوبائی حکومت نے صوبے کے عوام کو دہشت گردوں کے رحم و کرم پر چھوڑ دیا ہے۔ امن و امان کا بحران روز بروز بڑھتا جا رہا ہے۔ کیا پختون نسل کشی کا نیا دور شروع ہوگیا ہے؟ https://t.co/g60YYgGLMG	The terrorist attack on the police van in Lakki Marwat and the martyrdom of six policemen in it is a clear proof of the terror rule in Pakhtunkhwa. The provincial government has left the people of the province at the mercy of terrorists. The law and order crisis is increasing day by day. Has a new era of Pakhtun genocide begun? https://t.co/g60YYgGLMG	NIL	NIL	Hate
1587471645207416832	ضروری نہیں جو نظر آ رہا ہے وہی سچ ہو۔ یہ دکھانے والے کا کمال بھی ہو سکتا ہے کہ وہ آپ کو اپنی مرضی کی تصویر دکھا رہا ہو۔ جھوٹ، دجل اور فریب کا شکار ہو کر کسی فتنے کا حصہ مت بنیں، ہمیشہ اللہ سے صراط مستقیم اور ہدایت کی دعا کریں۔ اللہ ہم سب کو اپنے حفظ و امان میں رکھے۔ آمین https://t.co/d6ZCFfiblr	What is seen is not necessarily the truth. It can also be a miracle of the viewer that they are showing you a picture of their choice. Don't become a part of any temptation by falling prey to lies, Dajjal and deception, always pray to Allah for guidance and guidance. May Allah protect us all. Amen https://t.co/d6ZCFfiblr	NIL	NIL	No_Hate
1567483018973003777	بے شرم بے غیرت کمینے بزدل ذمانے بھر کے چول سالے سسر یہ بھی نہیں جانتے کہ خان کو ان چینلز کی ضرورت نہیں ان چوتیوں چینلز ٹیلی ویژنوں کو خان کی ضرورت ھے۔فرعون کے گھر موسی پیدا ھو گیا ھے کنڈوم چڑھانے جیسے سارے حربے ناکام ھو گئے اب نانی اماں کی سرجری خان ھی کرے گا۔برانڈ ھے برانڈ https://t.co/Q6l4TGI8qu	Shameless, dishonorable bastards, cowards, father-in-laws from all walks of life don't even know that Khan doesn't need these channels, these four channels, televisions need Khan. Musa has been born in Pharaoh's house. Now the grandmother will do the surgery. The brand is the brand https://t.co/Q6l4TGI8qu	NIL	NIL	Hate
1564939478858440708	میرا پیارا شہر ڈیرہ اللہ یار 😭 سیلاب میں ڈوب گیا نالائق بلوچستان گورنمنٹ✌️✌️ https://t.co/VRqCCRG2f6	My dear city Dera Allah yaar 😭 drowned in flood incompetent Balochistan Govt✌️✌️ https://t.co/VRqCCRG2f6	NIL	NIL	Hate
1562349962414931968	ایک خاتون بیج کا نام لینا اور اسے کسی مبینہ خلاف ورزی پر دھمکی دینا بہادری نہیں، یہ بزدلی ہے، یہ بد تمیزی ہے، یہ کوئی اعزاز نہیں، یہ بے عزتی ہے... #باولا_نیازی https://t.co/JEfKJHClsD	Naming a female badge and threatening her for an alleged violation is not bravery, it's cowardice, it's rude, it's not honorable, it's disrespectful... #Baola_Niyazi https://t.co/JEfKJHClsD	NIL	NIL	No_Hate
1578961818437189632	قائد تحریک جناب الطاف حسین بھائی کی ہدایت پر اہلیانِ کراچی مہاجر قوم کا واضح اعلان بائیکاٹ بائیکاٹ غداروں کا بائیکاٹ #NA237 #NA239 @AltafHussain_90 #CallToAction_BoyCottElection https://t.co/Y0j2GOCMEh	The people of Karachi under the direction of Quaid Tehreek Mr. Altaf Hussain Bhai A clear declaration of the migrant nation Boycott Boycott Traitors Boycott #NA237 #NA239 @AltafHussain_90 #CallToAction_BoyCottElection https://t.co/Y0j2GOCMEh	NIL	NIL	Hate
1607661561572909056	یہ وہ انپڑھ غدار ہے جس نے زاتی مفادات کے لئے ملک پر خنزیروں کو مسلط کردیا https://t.co/CABTqTnZTY	This is the illiterate traitor who imposed pigs on the country for caste interests https://t.co/CABTqTnZTY	ارشد بیٹاء وہ میں تھا. تم جام شھادت نوش کرکے ہمیشہ کیلئے زندہ ہو گئے, اور میں تاریخ کے اوراق میں ہمیشہ کیلئے ذلیل ہوگی ۵ے <۵	He was the eldest son. You are always drinking jam Lived for, and I forever in the pages of history Humiliation will be 5 < 5	Hate
1614489946403880965	حقیقی آزادی آج صرف #بلے_پہ_ٹھپہ https://t.co/1M5O1gWZCx	Real freedom today only #สัว_พัว_พิต https://t.co/1M5O1gWZCx	NIL	NIL	No_Hate
1573232557621186561	کیا شہروں میں قدرتی ماحول بنا کر موسمیاتی تبدیلیوں کے نتائج سے بچاؤ ممکن ہے؟ https://t.co/nvnhdhFpA1 https://t.co/3b50fcuThG	Is it possible to avoid the consequences of climate change by creating a natural environment in cities? https://t.co/nvnhdhFpA1 https://t.co/3b50fcuThG	NIL	NIL	No_Hate
1598664177026887680	#تصویری_جھلکیاں ہری پور ہزارہ میں شیخ ممتازعالم صاحب کی رہاٸش گاہ پر قبلہ حضرت صاحب کے اعزاز میں پر تکلف اعشایہ اور اھل محبت کی قبلہ پیر صاحب سے ملاقات اور احباب کی حلقہ ارادت میں شمولیت۔۔.... #jjp_media_cell https://t.co/nUKasmAPr7	#image_flashes At the residence of Sheikh Mumtaz Alam Sahib in Haripur Hazara, the Qibla in the honor of Hazrat Sahib and meeting with the Qibla of Ahl Mohabbate Pir Sahib and joining the circle of friends.... #jjp_media_cell https://t.co/nUKasmAPr7	NIL	NIL	No_Hate
1593812334673272835	وقت بہت کم ھے اور کام بہت زیادہ اپنے حصے کی شمع جلا دیجے ۔۔ اس سے پہلے کے لینے والے آ جائیں اور ہمارا ہوم ورک ہی پورا نا ہو ۔ https://t.co/fOq6Uvg8Cp	Time is very short And Too much work Burn the candle of your part. Let the previous takers come and our homework will not be completed. https://t.co/fOq6Uvg8Cp	NIL	NIL	No_Hate
1578786171144278016	پاکستان تحریک انصاف کے زیر اہتمام جشن عید میلاد النبی صل اللہ علیہ وسلم کی مرکزی تقریب کل اسلام آباد میں 12 ربیع الاول بروز اتوار شام 4 بجے بابرکت محفل میلاد منعقد ہوگی محفل میں ملک بھر سے علماء اور سکالرز شریک ہوں گے آئیے اس پر نور محفل کا حصہ بنیں #جشن_آمد_رسولﷺ #F9Park https://t.co/3DMDKYbzJv	The main event of Eid Milad-un-Nabi (Peace be upon him) organized by Pakistan Tehreek-e-Insaaf tomorrow in Islamabad On 12 Rabi Al-Awwal, Sunday at 4 pm, the blessed Mahfil Milad will be held Scholars and scholars from across the country will participate in the event Let's be a part of Noor Mahfil on this #Celebration_of_the_arrival_of_the_Rasul #F9Park https://t.co/3DMDKYbzJv	NIL	NIL	Hate
1617787990272806913	||•🖤🦋🌼•|| رزق حلال کی خاطر لباس کا گندا ہو جانا... 🌸✨ ضمیر کے گندا ہو جانے سے ہزار گناہ بہتر ہے💯🔥 https://t.co/TAtvx5iSai	||•🖤🦋🌼•|| Getting clothes dirty for the sake of halal sustenance... 🌸✨ A thousand sins are better than a dirty conscience💯🔥 https://t.co/TAtvx5iSai	NIL	NIL	No_Hate
1565705008737394688	ممنوعہ فنڈنگ کیس:سابق سپیکراسد قیصر کے گردگھیرا تنگ https://t.co/fHBboj0RUf https://t.co/t1iH4DTG5e	Prohibited Funding Case: Ex-Speaker Asad Qaiser's Ghira Tung https://t.co/fHBboj0RUf https://t.co/t1iH4DTG5e	عمنو فی ٣ک‏ سں: سای یکر اسدقیص ر کے روک رائنگ	Umno per 3k: Sai Yakar Asadqisr's Rook Raiing	No_Hate
1559070746877599750	دہشتگردوں کی فنڈگ کابڑا حصہ منشیات اورسمگلنگ کی کمائی سے آتا ہے، اس لیے اکثر اوقات یہ دہشتگرد ان غیر قانونی کاموں میں ملوث ہوتے ہیں، لوگوں کومنشیات پہ لگا کر ان سے دہشتگردی کرواتے ہیں بعد ان کو جہادی انقلابی ہیرو بنا کر ان کی لاشوں پر ڈالر وصول کرتےہیں #دہشتگردبلوچستان_کےدشمن https://t.co/cEWANzDI9j	A large part of the funding of terrorists comes from the earnings of drug and smuggling, so often these terrorists are involved in these illegal activities, drugging people and making them commit terrorism and then turning them into jihadi revolutionary heroes and then using them on their bodies. Receive dollars #देश्ष्टगर्डबूष्टान_केदेश्मन https://t.co/cEWANzDI9j	7 ح700 ہ'جطاعل ماف ت 2۸:۹ ا2طاەج کراچی: گارڈٹ بولیس چوکی پر دستی ہم حملے میں ایک اہلکار ھلاک : ذمہ داری قبول کرتے ہیں۔ بی این اے 7 ‏جوا‎ 7٣۳084 رر سر کراچی: گارڈن پولیس چوکی پر دستی ہم حملے میں ایک اہلکار ھلاک , ذمہ داری قبول کرتے۔ کراچی(اسٹاف ربورٹرز سے ) بلوچ نیشنلسٹ آرمی کے ترجمان مرید بلوچ نے اپنے جاری بیان میں کہاہے کہ سرمچاروں نے کل اتوار کی رات تقریبً ساڈھے	7 AH 700 AH Jataal Maaft 28:9 A2 Taj KARACHI: One of the armed attacks on Gardt Boles checkpoint Officials killed: accept responsibility. BNA 7 Gambling 733084 Rrr head Karachi: An officer was killed in an attack on the Garden police post, claimed responsibility. Karachi (from Staff Reporters) Mureed Baloch, spokesperson of Baloch Nationalist Army, made his statement I have said that the Sarmacha…	No_Hate
1568104820225228802	#بھارت اور #EU صاف توانائی اور آب و ہوا کی کارروائی پر تعاون کو تیز کریں گے۔ https://t.co/hY0Hy7LmKJ @MilapNN #India #EuropeanUnion #ClimateAction https://t.co/LAyNk6boK4	#India and #EU to step up cooperation on clean energy and climate action. https://t.co/hY0Hy7LmKJ @MilapNN #India #EuropeanUnion #ClimateAction https://t.co/LAyNk6boK4	NIL	NIL	No_Hate
1559900462698188802	@Mian_JavedLatif صادق امین چور جھوٹا بدکردار شخص ملکی مفادات کا سواد کرکے ملک یہ خسرا پاگل ہو چکا ہے https://t.co/7UFvEG7W4V	@Mian_JavedLatif Sadiq Amin, thief, liar, wicked person, the country has gone crazy after knowing the interests of the country https://t.co/7UFvEG7W4V	دواقیرت زین 0 -, سب کےکھرے میں جٹیٹھاء اہ رکٹ ما اتا لی عوام سے عو وشما م کا لیا / ںكاے 2	Dwaqirat Zain 0 -, Jatitaha in all 2	Hate
1566019130209308672	ساری دنیا کا کفر اور پاکستان کے سارے دونمبر سیاستدان ایجنسیاں جس آدمی کی جوتی بھی نہیں خرید سکیں اس کو میرا قائد کہتے ہیں ببر شیر سعد رضوی #سعدساڈا_شیراے https://t.co/Tenu1FHKae	The disbelief of the whole world and the agencies of all the second-ranked politicians of Pakistan, the man whose shoe could not be bought, is called Babbar Sher Saad Rizvi as my leader. #سادسادا_شيراي https://t.co/Tenu1FHKae	NIL	NIL	Hate
1617840198024589317	پاکستان کا مقدر تبدیل کرنے والا خاندان..!! 2023 میں بلاول بھٹو زرداری وزیراعظم پاکستان ہوں گے. ان شاءاللہ @BBhuttoZardari @AseefaBZ @BakhtawarBZ @AAliZardari https://t.co/eKUbnznToj	The family that changed the fate of Pakistan..!! Bilawal Bhutto Zardari will be the Prime Minister of Pakistan in 2023. God willing @BBhuttoZardari @AseefaBZ @BakhtawarBZ @AAliZardari https://t.co/eKUbnznToj	NIL	NIL	No_Hate
1578414468480270337	ابھی ایک ٹوئٹ میں 12 ربیع الاول کے علم پہ اعتراض دیکھے، عجیب حیرانی ہوئی، جیسے لوگ شائد تاریخ سے ناآشنہ ہیں، پچھلے زمانے میں #علم سپہ سالار کے حوالے کیا جاتا تھا جو ہر فوج کی نشانی ہوتی تھی جو مسلمان عیسائی سب اٹھاتے تھے حضرت علی ؑ لاتعداد جنگوں میں رسول ﷺ خدا کے علمبردار رہے، https://t.co/0eSCEP3cfU	Just saw an objection to the knowledge of 12 Rabi'ul Awwal in a tweet, I was surprised, as if people are probably unfamiliar with history. In the past, #Ilam was handed over to the army commander which was the symbol of every army which was carried by all Muslims and Christians. Hazrat Ali (AS) was the bearer of the Messenger of God (PBUH) in countless wars, https://t.co/0eSCEP3cfU	NIL	NIL	No_Hate
1573016732725555200	آج ۲۶ صفر المظفر بروز جمعرات میرے لیے عید کا دن ہے۔ الحمد الله آج مرکز رحمت اللعالمینﷺ میں امیرِ محترم سے خصوصی ملاقات کا شرف حاصل ہوا۔ امیر محترم کو آپکی سالگرہ کی مبارک بھی دی جس کی خوشی میں آپ نے تحفے میں خوبصورت ٹوپی عنایت کی❤ #SaadHussainRizvi #گستاخوں_کےحمایتی_کنفرم_لعنتی https://t.co/eppYMZ2nmq	Today, 26th Safar al-Muzaffar, Thursday is the day of Eid for me. Alhamdulillah, today I had the privilege of meeting the honorable Amir at the Center of Mercy of the Worlds. Amir also wished you a happy birthday for which you gifted him a beautiful hat #SaadHussainRizvi #जस्ताधुन_केहमायती_कृफ्रम_लानती https://t.co/eppYMZ2nmq	NIL	NIL	No_Hate
1580147057675100165	اس 28سال کے نوجوان کی قیادت میں اتوار والے دن صبح دس بجے شیطان اعظم کی شیطان حکومتKPKکو بتائیں گے کہ تم کون ہوتےہو میلاد منانے سے روکنے والے ہمیں کسیDC,DPOسےاجازت لینے کی ضرورت نہیں ہم جہاں چاہیں گے حضور پاک صلی اللہ علیہ وسلم کی آمدکامیلاد منائیں گے❤💪 #ImamKhadimHussainRizvi https://t.co/5v5Vozph5b	Under the leadership of this 28-year-old youth, at ten o'clock in the morning on Sunday, the satan government of Shaitan Azam will tell the KPK that who are you to prevent the celebration of Milad. We don't need to take permission from any DC, DPO, we will celebrate the arrival of Holy Prophet PBUH wherever we want ❤💪 #ImamKhadimHussainRizvi https://t.co/5v5Vozph5b	7170۶۴(۲2 ه2 ۰۸۰ ۷ا۳۰۰۵0<۵۸۲۶ہ1ا2/۱:۵7:۲۵۵ھ2 داد!۱۹٥:ہ7:2075ت0)‏	717,064	Hate
1614959943806861313	میری وفـا کـو تیـرا برتـاؤ یـاد ہـے سـب اب مسئلہ یہ ہے میرے مستحق نہیں تم 🖤🥀 https://t.co/wrA3ra71o7	Everyone remembers your behavior towards my loyalty Now the problem is you don't deserve me 🖤🥀 https://t.co/wrA3ra71o7	NIL	NIL	No_Hate
1608210375140610048	ہر جگہ بندوق والے "کہاں جارہے ہو؟ کہاں سے آرہے ہو؟ Reality of Gwadar.! #Balochistan #GwadarProtest #GwadarUnderSieged #Gwadar https://t.co/qthHKpH3mZ	Gunmen everywhere "Where are you going? Where are you coming from?" Reality of Gwadar. #Balochistan #GwadarProtest #GwadarUnderSieged #Gwadar https://t.co/qthHKpH3mZ	NIL	NIL	No_Hate
1578066812893364225	بریکنگ نیوز میم مریم نواز شریف لندن پہنچ گئ! بیٹا جنید صفدر بھی ہمراہ https://t.co/dg90WuZkt3	Breaking news Mem Maryam Nawaz Sharif arrived in London! Son Junaid Safdar also accompanied https://t.co/dg90WuZkt3	NIL	NIL	No_Hate
1567878459371683841	آج خان 3 گھنٹے سے زائد وقت عدالت میں موجود رہے اور اپنے conduct سے عدالتی وقار میں اضافہ کیا انہوں نے ہمیشہ قانون کی حکمرانی کو ترجیح دی دوسری طرف ملک کا وزیراعظم اور اس کا بیٹا 8 ماہ سے حیلے بہانوں سےفرد جرم سے بچتے آ رہے ہیں یہی فرق ہے لیڈر اور گیدڑ میں. #IStandWithImranKhan https://t.co/7FDisxvdia	Today, Khan was present in the court for more than 3 hours and increased the prestige of the court by his conduct. He always preferred the rule of law. This is the difference between a leader and a jackal. #IStandWithImranKhan https://t.co/7FDisxvdia	NIL	NIL	Hate
1576951601746436096	#پہلے_پیر_پڑنا_پھر_بھونکنا فتنہ نیازی بہروپیہ دوغلا اور منافق جلسوں میں کچھ روپ اور بند کمروں میں کوئ روپ https://t.co/MBQcDG35XJ	#Fall_toe_first_then_bark Fitna Niazi Bahrupia Dougla and hypocrite some form in meetings and some form in closed rooms https://t.co/MBQcDG35XJ	ولرں ضڈیلوز لک - ۰ م۸ پر ہن دکمروں میں تیور سے اتا ور معافیاں ان ۵ قننہ خا نکی سیاس تکا 2 س٥‏ مق رمنظ روا حت 2 ٰ	Villarn Zadeloz Luck - 0 m8 But the Hindus came from Tevar And apologies to them 5 Qanana Khan Niki Sias Taka 2 S5 Moq Ramnaz Rawat 2	Hate
1580853182678257664	@pmln_org لگ بھی رھے تھے امید سے نارمل یا سیزیرین ؟ کھوتا یا کھوتی ؟ سرجری کا تو پہلے ھی بتادیا تھا میڈم نے ھمیں 😎😎😎 https://t.co/xVXEx9yfrp	@pmln_org was looking normal or caesarean with hope? Lost or lost? Madam had already told me about the surgery 😎😎😎 https://t.co/xVXEx9yfrp	NIL	NIL	Hate
1572988906051702785	ڈپٹی کمشنرو ایڈمنسٹریٹر ضلع وسطی طحہ سلیم کی ہدایت پر بلدیہ وسطی کے اسکولوں میں ڈینگی وائرس سے بچاؤ کے لئے جراثیم کُش اسپرے کیا جارہا ہے #Press_release https://t.co/DwhqZGG0hh	On the instructions of Deputy Commissioner and Administrator District Central Taha Saleem, disinfectant spraying is being done in the schools of Central Municipality to prevent dengue virus. #Press_release https://t.co/DwhqZGG0hh	یک شن وٹ یشرع عوسی کی ہتپ بل یھی کے امو می ہی دائیں سے ہا وکے لے جراوکش اسہرےکیا جا اسے۔	Yek Shin Wit Yesharia Usi's Hatap Bil Yehi Ke Amo Mi Hei Ha Vke Le Jarauksh Asahre Kiya Jaa to him.	No_Hate
1558117551359623168	قانون سب کے لیے برابر ہے ۔یہ دنیا کا سب سے بڑا جھوٹ ہے۔قانون مکڑی کا وہ جالا ہے جس میں کیڑے مکوڑے تو پھنس جاتے ہیں مگر بڑے جانور اس کو پھاڑ کر نکل جاتے ہیں "افلاطون" #ReleaseBabyGirl https://t.co/alwaNzg0BW	Law is equal for all. This is the biggest lie in the world. Law is a spider's web in which insects are trapped but big animals tear it out. "Plato" #ReleaseBabyGirl https://t.co/alwaNzg0BW	NIL	NIL	No_Hate
1564581681264316416	@imziishan @MashwaniAzhar مادر چود چند پیسے دے کر ایک غریب عورت سے اپنی مرضی کے لائین کہلوانے سے مریم نواز کو توبجوئ فرق نہیں پڑا لیکن تم جیسے بھڑوے کی اصلت باہر آ گئ مریم نواز کے جانے کے بعد امدادی سامان تقسیم ہوا اور اس عورت کو بھی ملا #مانیکازادے https://t.co/BPvnynBWlx	@imziishan @MashwaniAzhar mother Maryam Nawaz did not make any difference to a poor woman by paying a few bucks to call her a lion of her choice, but the true nature of a pimp like you came out. After Maryam Nawaz's departure, relief materials were distributed and this woman also received #Manikazadeh https://t.co/BPvnynBWlx	NIL	NIL	Hate
1592879696714551296	@imsyedhamid @Haqeeqat_TV تحائف کی بات نکل ہی آئی ہے تو پٹواریو اب قطری شہزادے کیطرف سے ملنے والے تحفوں کا حساب بھی دینا پڑے گا بہن کہ لوڑوں مادر چودوں https://t.co/y1AuvwYI22	@imsyedhamid @Haqeeqat_TV Now that the talk of gifts has come out, now Patwari will have to account for the gifts received by the Qatari prince, sister, that the children of Mother Chodu https://t.co/y1AuvwYI22	NIL	NIL	Hate
1614977914533203969	کالے انگور کا درخت https://t.co/n7LGIN8abF	Black Grape Tree https://t.co/n7LGIN8abF	NIL	NIL	No_Hate
1596191652896440321	کہتے ہیں دو بھائی ایک دوسرے کیساتھ زمین کے ٹکڑے پر لڑ مرے اس پر انکے والد نے ان دونوں کی قبریں اسی زمین پر بنوا کر کہہ دیا کہ سنبھالو اپنی زمین سب کے لئے نشان عبرت بنا ڈالا زندگی چار دن کی محبتیں بانٹیں ساتھ کچھ نہیں لے کر نہ جائیں گے تو بس ہمارے اچھے اعمال ساتھ جائیں گے؟ https://t.co/u8ELYBUdZy	It is said that two brothers died fighting over a piece of land, so their father built the graves of both of them on the same land and told them to take care of their land. Share the love of four days of life, we will not take anything with us, so only our good deeds will go with us? https://t.co/u8ELYBUdZy	NIL	NIL	No_Hate
1608556454067470337	´تلاش ورثہ` یہ بچہ تھانہ اسٹیل ٹاؤن ضلع ملیر کراچی کو لاوارث ملا ھے جو اپنا نام نھیں بتا پارھا جسکی عمر تقریبن 07 سالا ھے اور بچہ اس وقت اسٹیل ٹاؤن تھانے میں موجود ھے جس کا بھی ھے وہ اسٹیل ٹاؤن تھانہ کے ذیوٹی افسر ASI سائینداد جلبانی سے فون نمبر 03072919746 پر رابطہ کرے،جزاک اللہ https://t.co/qByWzjXfG8	"Search for Heritage". This child was found abandoned by Steel Town Police Station, District Malir, Karachi, who has not given his name. Contact number 03072919746, Jazakullah https://t.co/qByWzjXfG8	NIL	NIL	No_Hate
1617396597029052417	ہمیں فطرت کے سامنے ایسے ہی سچا اور کھڑا ہونا چاہیے، جیسا کہ وہ ہمارے سامنے ننگی اور برہنہ کھڑی ہے۔ ~دانیال https://t.co/nXjWA38sRS	We must stand before nature as true and upright as she stands bare and naked before us. ~Daniel https://t.co/nXjWA38sRS	NIL	NIL	No_Hate
1567084206836023296	پہلے تم سے اندھی محبت کرتے تھے آپ کے ہر اچھے برے کام کا دفاع کرتے تھے 9 اپریل کو محبت کا رشتہ ٹوٹا کہانی ختم نہیں ہوئی اپنی غلطی کو سہی ثابت کرنے کیلئے آپ نے اپنے خلاف نفرت پیدا کی اب جو کچھ کر رہے ہو اب تو گن آتی ہے تم سے خود سے بھی کہ ہم کئی دہائیوں تک تمہارا دفاع کرتے تے https://t.co/O921kcIBWt	Earlier I used to love you blindly used to defend your every good and bad deed On April 9, the love affair broke up The story is not over You created hatred against yourself to prove yourself wrong What are you doing now? Now it comes to you Even from ourselves that we would have defended you for decades https://t.co/O921kcIBWt	NIL	NIL	Hate
1570990912616173569	#دمشق #شام دمشق کے بین الاقوامی ہوائی اڈے اور دمشق کے جنوب میں الدماس اور قدسیہ مقامات پر اسرائیل نے 94 ویں بریگیڈ کو میزائل بمباری کا نشانہ بنایا۔۔ جس کے نتیجے میں اسدی ایرانی ملشیا کے 5 ارکان کی ہلاکت اور مادی نقصانات ہوئے۔۔۔ #سوريا https://t.co/6byLz0PZTv	#Damascus #Syria Israel bombarded the 94th Brigade with missiles at Damascus International Airport and Al-Damas and Qudsiya areas south of Damascus. As a result, 5 members of the Asadi Iranian militia were killed and material losses were caused. #Syria https://t.co/6byLz0PZTv	NIL	NIL	No_Hate
1580093969223995392	صبر اور حسنِ خاتمہ کی دعا الاعراف 126 رَبَّنَاۤ اَفْرِغْ عَلَیْنَا صَبْرًا وَّ تَوَفَّنَا مُسْلِمِیْنَ۠ اے رب، ہم پر صبر کا فیضان کر اور ہمیں دنیا سے اٹھا تو اِس حال میں کہ ہم تیرے فرماں بردار ہوں https://t.co/1zJDyywHfN	Prayer for patience and good ending Al-A'raf 126 May God grant us patience and may we die as Muslims. O Lord, bestow upon us patience and lift us up from the world so that we may bear Your command https://t.co/1zJDyywHfN	NIL	NIL	No_Hate
1608038654131474432	پارلیمان نے سلیکٹڈ وزیراعظم کو گھر بھیجا ( بلاول بھٹو) https://t.co/uTjfFsIAQL #faizeawam #dailynews #PakistanNews #dailyfaizeawam #newspaper #Headlines #BilawalBhutto https://t.co/JnN2JcB8DZ	Parliament sent the selected Prime Minister home (Bilawal Bhutto). https://t.co/uTjfFsIAQL #faizeawam #dailynews #PakistanNews #dailyfaizeawam #newspaper #Headlines #BilawalBhutto https://t.co/JnN2JcB8DZ	پارلیمان نے لیڈ زیر ش(ٹ مکوک رکیل( بل ول بھٹو) 06 ۷۷۰۷۷۰۰۸۸۱۱۷٣۹۱٥ ٥3۷۷۵۳۲ ۰۰۳"	The Parliament appointed Bill Bhutto as the leader. 06 7707700881173915 5377532 003"	No_Hate
1608409937100836868	@QasimKhanSuri اس حرام خور کا وجود حرام کھاکھاکر سُور جیسا ہوگیا ہے مر جائے گا کسی دن پھٹ کر کیسا ملک ہے پاکستان بھی گندے گھٹیا لوگوں کی گھٹیااولادیں اس ملک میں صحافی کہلاتی ہیں https://t.co/wKgoFlP14W	@QasimKhanSuri The existence of this haram eater has become like a pig after eating haram, it will die one day by bursting. What kind of country is Pakistan? The bastard children of dirty bastards are called journalists in this country https://t.co/wKgoFlP14W	NIL	NIL	Hate
1593147737192960000	زہرا(س) کی مصیبت کا تمہیں واسطہ علی؏ مشکل کو میری حل کرو مشکل کشا علی؏ https://t.co/EfXLO0uaKL	The trouble of Zahra (S) is related to you by Ali Solve the problem for me	NIL	NIL	No_Hate
1563245449724973057	مستونگ میں آپریشن کے لیے ریاستی مشینری استعمال ہوتی ہے بلوچ اور پشتون کا نسل کشی کے لیے ریاستی مشینری استعمال ہوتی ہیں لیکن کوہستان سیلاب میں پھنسے پانچ بھائی چار گھنٹے زندگی اور موت سے لڑتے رہے ریاست ان کو نہ بچا سکی۔ https://t.co/06Ru6CQ1kn	State machinery is used for operations in Mastung, state machinery is used for genocide of Baloch and Pashtun, but the five brothers trapped in Kohistan flood fought for life and death for four hours, the state could not save them. https://t.co/06Ru6CQ1kn	اقم ہیں	There are nations	Hate
1588191414621462531	ضلع باجوڑ! چیئرمین تحریک انصاف عمران خان پر قاتلانہ حملے کے خلاف ضلع باجوڑ کے غیور عوام اور پارٹی کارکنان سڑکوں پر نکل آئے خار بازار 3 گھنٹے سے زبردست احتجاجی مظاہرہ جاری۔ #عمران_خان_ہماری_ریڈ_لائن_ہے https://t.co/5K1xEupzSI	Bajaur District! Against the murderous attack on Chairman Tehreek-e-Insaf Imran Khan, the enthusiastic people and party workers of district Bajaur came out on the streets of Khar Bazar, and a strong protest has been going on for 3 hours. #Imran_Khan_is_our_red_line https://t.co/5K1xEupzSI	NIL	NIL	No_Hate
1577591917516292096	قومی سلامتی کے ساتھ کھیل کھیلنے والا نیازی فتنے باز آئین شکن اسلام آباد کرنے کیا آ رہاہے؟ قومی مفادات کے ساتھ یہ گھناؤنا اور سنگین کھیل کب تک کھیلتے رہیں گےسیلاب متاثرین کی مدد کرنےکے بجائے لانگ مارچ کی تیاری؟ عوام فتنہ باز کو پہچان گی ہے @Atifrauf79 #قومی_سلامتی_کھیل_نہیں https://t.co/3Hk9rUzpRs	What is the anti-constitutional Islamabad being done by the Nazis who are playing games with national security? How long will they continue to play this hideous and serious game with the national interests, instead of helping the flood victims, preparing for a long march? People will recognize the miscreant @Atifrauf79 #National_Safety_Kheel_Not https://t.co/3Hk9rUzpRs	کٹ نیکیشن سے پیا سے نثابت وکیا ےکلہ ران خان چو ر اور تچھوماالسان ے	Drunk from a cut nication What is the relationship between Ran Khan Chur and Tchuma Ulsan	Hate
1567923943037616128	@Khankamoo دیکھ دوٹکے کا کون ہے بہن کے لوڑے گانڈو ماں کے گانڈو یوتھیے @Khankamoo پہچان اپنے بھکاری باپ کو کسے جھنڈے کا ڈنڈا پکڑا ہوا ہے https://t.co/tWK3gcj6gj	@Khankamoo see who's daughter's son sister's son's son mother's son @Khankamoo know which flag stick his beggar father is holding https://t.co/tWK3gcj6gj	NIL	NIL	Hate
1592831697585700865	پھول تو پھول ہیں آنکھوں سے گھرے رہتے ہیں کانٹے بیکار حفاظت میں لگے رہتے ہیں وسیم بریلوی #FeelingMyself🥀 https://t.co/mg4aEMd8uJ	Flowers are flowers, they are surrounded by eyes The forks remain in idle safety Waseem Barelvi #FeelingMyself🥀 https://t.co/mg4aEMd8uJ	NIL	NIL	No_Hate
1564179886830403586	@Saeedbunere2 جب اولاد حرامی ھو تو اپنی ماں کو گشتی ھی بولے گی جیسے تو دلے کی اولاد ھے تو تو مراد وارشل سے بھی بڑی وارشل ھے تو دھرنے کی پیداوار ھے گشتی ماں کے بچے https://t.co/vh1Sh9PFl3	@Saeedbunere2 when children are bastards So I looked for my mother She will speak like you He is the son of Dale So, it also refers to Varshal If there is a big battle, then sit down The product is the patrol mother's child https://t.co/vh1Sh9PFl3	جار کے گی ایک قوم تھی جھ ہر آ نے والی ایی 2+ جانے دالی اپقی ائی کو تی کے ہیں	There was a nation of Jar Ke Gee The upcoming AI 2+ They are known for their loyalty	Hate
1563514817230434307	کہاں ہے یہ سندھ کو 15 سال سےلوٹنے والا ڈاکو سندھ کے حقوق پر ڈاکا ڈالنے والا https://t.co/rqasJnY0Iy	Where is this bandit who has been robbing Sindh for 15 years, robbing the rights of Sindh https://t.co/rqasJnY0Iy	ایم این ایز کو 56 کروڑ میں خرید سکتا ہوں لیکن غریب کو 10 روپے نہیں دے سکتا ہوں کیونکہ ان کی اوقات بس یہی ہے۔!لإ	Can buy MNEs for 56 crores but Can't give 10 rupees to a poor person Because that's all their hours are	Hate
1592826389593747456	تمام اثاثے شو کر دیے #صحافت_نہیں_غلاظت_ہے #صحافت_کا_چکلہ_جاتی_عمرہ https://t.co/AL0lHO6DBv https://t.co/sFlX5hp6Uf	All assets are shown #Journalism is not dirty #صحافت_كا_کھلہ_Jati_Umrah https://t.co/AL0lHO6DBv https://t.co/sFlX5hp6Uf	NIL	NIL	Hate
1566426869553037313	ایشیا کپ سپر فور مرحلہ: پاکستان کا بھارت کیخلاف ٹاس جیت کر فیلڈنگ کا فیصلہ: دبئی انٹرنیشنل کرکٹ اسٹیڈیم میں کھیلے جارہے میچ میں پاکستان کے کپتان بابراعظم نے ٹاس جیت کر بھارت کو پہلے بیٹنگ کی دعوت دے دی: https://t.co/f5puNY0WR9	Asia Cup Super Four Stage: Pakistan's fielding decision after winning the toss against India: In the match being played at the Dubai International Cricket Stadium, Pakistan captain Babar Azam won the toss and invited India to bat first: https://t.co/f5puNY0WR9	NIL	NIL	No_Hate
1573969346526793728	سارا قتل کیس : عثمان مختار نے سسٹم پر سوال اٹھا دئیے - https://t.co/TOiDu8HbNU https://t.co/DENor1fJaF	Sara murder case: Usman Mukhtar raised questions on the system - https://t.co/TOiDu8HbNU https://t.co/DENor1fJaF	NIL	NIL	No_Hate
1567902999313367040	پاکستانی عوام کو پہنائی گئی ٹوپی کا سائز ! 🤣😜 https://t.co/S0Z8URpQQe	The size of the hat worn by the Pakistani people! 🤣😜 https://t.co/S0Z8URpQQe	NIL	NIL	Hate
1562092236904583168	اب یہ تاریخ سے ثابت ہو چکا ہے کہ جھوٹا، مکار، جاہل، کرپٹ، چور، لالچی اور منافق۔ یہ 7 الفاظ عمران خان آپ کی ذات اور سیاست سے منسلک نہیں ہیں کیا؟؟ #عمران_جواب_دو https://t.co/duWSfmfN5r	Now it has been proved by history that liar, deceitful, ignorant, corrupt, thief, greedy and hypocrite. These 7 words Imran Khan are not related to your caste and politics?? #امران_جواب_دو https://t.co/duWSfmfN5r	NIL	NIL	Hate
1568899267691008000	اب تو ہم پاکستانی قوم کو یقین ہو گیا ہے کہ امریکہ کی سازش میں چند بڑے جرنیلوں اور سپریم کورٹ کے ججوں نے مل کر ملک و قوم کے ساتھ بہت بڑا غداری کی ہے ہمیشہ سے چند جرنیل اور ججوں نے مل کر ملک و قوم کو ترقی نہیں کرنے دی پاکستان زندہ باد پاک فوج زندہ باد امپورٹڈ_حکومت_نامنظور# https://t.co/NGPteh58dq	Now we, the Pakistani nation, have come to believe that a few big generals and judges of the Supreme Court have committed a great betrayal of the country and the nation in the conspiracy of the United States. A few generals and judges have always not allowed the country and the nation to develop together Long live Pakistan Long live Pak Army Imported_government_disapproved# https://t.co/NGPteh58dq	NIL	NIL	Hate
1578562188293599232	خود کو صحافی سمجھتے ہو اور اس باعزت پیشے کو چند حرام کے سکوں کی نظر کر دینے والو حرام کو قبلہ اول بنانا ہی تھا تو کوٹھا سجا لیتے جہاں نہ صرف ڈھیر سارا پیسہ کما لیتے بلکہ مومن صفت عمران خان پر تہمت لگا کر اپنی دنیا اور آخرت بھی بچا لیتے😡 #لعنتی_لفافہ_صحافی https://t.co/z9Mga5Km3n https://t.co/2xQ0AoE8Ha	Those who consider themselves to be journalists and who have given this honorable profession to the sight of a few haram coins would have made the first Qibla of the haram, then they would have decorated the room where they would not only have earned a lot of money, but they would have defamed the faithful Imran Khan and their world and He would have saved the hereafter too #الانتی_لفافه_شافی htt…	‎۱٢٢ 07‏ ۲8۲۱ھ 8 ۱۲ی) ۱ ا۸ ۹۶۷۱۱۷۷٠۹٠٤)۲٥ا5‏ ۸0۸۷۸۷۱۸۸ ‎۲٦ ۲ ۲1۲۸۸ 16 7‏ ‏کرک یں ہے اسعتا ۷اا ۳۳۵ گضاناحد ۳	122 07 2821 AH 8 12i) 1 A8 96711770904) 25 A5 808787188 26 2 21288 16 7 Kirk hai Asata 7 aa 335 Ghazanahd 3	Hate
1617750104425005056	پاک فوج کی موثر کاروائیوں کی بدولت ملک سے دہشتگردی کے ناسور کا خاتمہ ممکن ہوا ہے اور امن بحال ہوا ہے #پاک_فوج_ہماری_ریڈ_لائن https://t.co/K3dNY95iZt	Thanks to the effective actions of the Pakistan Army, the scourge of terrorism has been eradicated from the country and peace has been restored #Pak_Forge_Our_Red_Line https://t.co/K3dNY95iZt	NIL	NIL	No_Hate
1564943095648735235	علیمہ خاں نے بھی تین عرب اکٹھے کر لیے😂😂😂 https://t.co/714YIP4JB0	Alimah Khan also collected three Arabs 😂😂😂 https://t.co/714YIP4JB0	١ص‏ ۷۳۷ات نٹ چھ ےی 67 42+ سست ے4	1 p. 737 Nat Six 67 42+ slow 4	Hate
1593848826498007046	@TahirMughalPml2 باقاعدہ دو ٹٹے اور للی جیسا ہے رے تو https://t.co/ZaORUfMvBG	@TahirMughalPml2 is like a regular two horses and a lily https://t.co/ZaORUfMvBG	NIL	NIL	Hate
1595729716903821315	عمران خان کے حکم کی کوئی آئینی اور قانونی حیثیت نہیں ہے ۔ بنی گالا کوٹھے والا دراصل فیس سیونگ چاہتا ہے اور کچھ نہیں ۔ https://t.co/TNsNd6vH0N	Imran Khan's order has no constitutional and legal status. Bani Gala Kothewala actually wants face saving and nothing else. https://t.co/TNsNd6vH0N	‎۲۱۹۹٥٥١٥٠ ۲۷ 9 6911116131 ۳‏ عمران خان کو چاہیے حافظ قرآن جنرل عاصم منیر کی تعیناتی پر صدر کو دستخط کرنے کا حکم دیں. ‏عمران خان خود کہہ چکے کوئی بھی آئے فرق نہیں پڑتا. ملک کو آگے لے جانا ہے جو پیچھے نقصان ہو چکا 7 مہینوں میں اسکو ٹھیک کرنا. ‏پوری قوم کو ہیجانی کیفیت سے نکالنا ہوگا. الله مددگار ہوگا سبکا	219955150 27 9 6911116131 3 Imran Khan needs Hafiz Quran General Asim Munir Order the President to sign the appointment. Imran Khan himself has said that whoever comes does not matter. The country has to take forward what has been lost behind 7 Fix it in months. The entire nation has to be taken out of the state of agitation. Allah is the helper It will be alright	Hate
1593546216251564032	ایسا ہے تو ڈائن إِنْ شَاءَ ٱللَّٰهُ تمہارے ساتھ اور تمہارے پورے خاندان کے ساتھ ٱللَّٰهُ پاک اُس سے کئی زیادہ دردناک تکلیف دہ اور پوری دنیا براہ راست دیکھے اور اُس کے بعد زندہ لاشوں کی طرح چھوڑ دیں نہ زندوں میں ہو نہ مردہ میں ہو آمین ثم آمین. #ارشد_تیرے_خون_سے_انقلاب_آۓ_گا https://t.co/2i5xeS8gGc	If this is the case, then, God willing, may God be with you and your entire family, may God be with you and your entire family, and may the whole world see it directly and leave it like living corpses, neither among the living nor among the dead, Amen. Amen. #Arshad_Tere_Khon_Se_Inqlab_Aay_Ga https://t.co/2i5xeS8gGc	و سد ذدائ کا دماکی ےہ ارسشد صشریف گی ساٹ میں ویڈو ہدان پراو راس ستفاصسل ے ؛ یہ ضر لئ مفضل تد	And Arshad Sasharif is the master of Sad Zada Vedu Hadan Prav Ras in Gay Sat Details; This is a good thing	Hate
1568959312084475907	لیفٹینینٹ جنرل محمد عامر ایک دیانتدار اور پروفیشنل محب الوطن فوجی اور باجوہ صاحب کے بعد آرمی چیف کے سب سے مضبوط امیدوار ہیں اللہ پاک ہر فیصلہ ملک و قوم کے حق میں ہو آمین 🌹 @OfficialDGISPR #ispr #فتنہ_عمرانیہ_قادیانیہ https://t.co/6H3XZ2UJCZ	Lieutenant General Muhammad Aamir is an honest and professional patriotic soldier and the strongest candidate for Army Chief after Bajwa Sahib. May Allah Almighty make every decision in favor of the country and the nation, Amen 🌹 @OfficialDGISPR #ispr #فتنه_عمرانيه_Qadianiyyah https://t.co/6H3XZ2UJCZ	NIL	NIL	No_Hate
1566662578604068864	ایک طرف ہے پاکستان کو کھانے والے ایک طرف ہے پاکستان کو بچانے والا یہ لڑائی آخری لڑائی ہے یا تو پاکستان بچے گا یا مافیا پاکستان بچانے کے لیے ہمیں کپتان کا ساتھ دینا ہوگا اگر آپ کپتان کے لیے ٹویٹر پر لڑنا چاہتے ہو تو ہماری ٹیم جوائن کرنے کےلیے کمنٹس میں YES لکھیں @TeamiPians https://t.co/CMc5e7yN6y	On one side are those who eat Pakistan On one side is the savior of Pakistan This fight is the last fight Either Pakistan will survive or mafia We have to support the captain to save Pakistan If you want to fight for the captaincy on Twitter, write YES in the comments to join our team @TeamiPians https://t.co/CMc5e7yN6y	ر3۴ گا 5 زا٥0‏ دا۱٥ء‏ ۷عع٥٥٥۱‏ <٦ 8 ال٥ ‏ف9 کے‎ 4 4٤ 0 2	R34 Ga 5 Za50 Da15 7 Aa 5551 <6 8 Al 5 F9 K 4 44 0 2	Hate
1578054753808175104	اسلام آباد ! 19ویں سالانہ ، تاریخ ساز "شہداۓ اسلام و استحکام پاکستان کانفرنس" سے ایم پی اے جھنگ ، جگرگوشہ مولانا محمد اعظم طارق شہیدؒ مولانا محمد معاویہ اعظم طارق صاحب خطاب کررہے ہے ۔۔ https://t.co/0kp0pq3QOg	Islamabad! Maulana Muhammad Azam Tariq Shaheed, MPA Jhang, Jigargosha Maulana Muhammad Azam Tariq Sahib is addressing the 19th annual, history-making "Martyrs of Islam and Stability of Pakistan Conference". https://t.co/0kp0pq3QOg	NIL	NIL	No_Hate
1592408022378483714	سی ای او ایل ڈبلیو ایم سی علی عنان قمر کی ہدایات پر لاہور ویسٹ مینجمنٹ کمپنی کے ورکرز شہر کے داخلی اور خارجی راستوں کو صاف ستھرا رکھنے میں مگن ہیں. #LWMC #lahore #Pakistan #Punjab #cleanandgreen #cleanlahore #environment #smog #dengue #operation #news https://t.co/sH1O5aMQde	On the instructions of CEO WMC Ali Anan Qamar, the workers of Lahore Waste Management Company are engrossed in keeping the entrances and exits of the city clean. #LWMC #lahore #Pakistan #Punjab #cleanandgreen #cleanlahore #environment #smog #dengue #operation #news https://t.co/sH1O5aMQde	NIL	NIL	No_Hate
1567924939251908614	کیا آپ جانتے ہیں؟ افغانیوں والی منافقت افغانیوں والی نمک حرامی افغانیوں والی ساری خصلتیں صرف عمران خان نیازی میں کیوں ہیں ؟ کیونکہ شوکت خانم ایک افغانن رقاصہ تھی اور یہ مانی رامدہ اس رقاصہ کا پلا تھا- 🖐🖐 #ChishtianSherKa https://t.co/126hapxx5t	do you know The hypocrisy of Afghans, the salt prohibition of Afghans, all the traits of Afghans Why is only Imran Khan in Niazi? Because Shaukat Khanum was an Afghan dancer and Mani Ramda was the daughter of this dancer. 🖐🖐 #ChishtianSherKa https://t.co/126hapxx5t	NIL	NIL	Hate
1605509929992798209	پہلے زرداری ڈاکو کے بڑوے باجوہ اور اب نواز شریف کا بڑوا عاصم منیر۔ان مادر چودوں کوکب غیرت آئےگی۔ فکر نہ کرو ہم بھی انکو روز ننگا کریں گے۔ @OfficialDGISPR @SHaiderRMehdi #امپورٹڈ_حکومت_نامنظور #BiloRaniChor #ZardariDakoo #ZardariMafia #imrankhanPTI #BajwaTraitor #ReleaseAzamSwati https://t.co/luwuRV1NgE https://t.co/hNBZopC5ON	First Zardari Dako's nephew Bajwa and now Nawaz Sharif's nephew Asim Munir. When will honor come to these mothers. Don't worry we will also expose them daily. @OfficialDGISPR @SHaiderRMehdi #imported_government_unapproved #BiloRaniChor #ZardariDakoo #ZardariMafia #imrankhanPTI #BajwaTraitor #ReleaseAzamSwati https://t.co/luwuRV1NgE https://t.co/hNBZopC5ON	NIL	NIL	Hate
1614367091947180036	@Official_QAS یہ بندہ پاگل ہو گیا ہے ۔۔۔ یہ تو اس ملک کاحل ہ😈😡😡دنیا میں اللہ نے جزا سزا کے قانون بنائے.. دھریہ ممالک کے بھی قوانین ھیں... تاکہ دنیا انسان نما درندوں کی آماجگاہ نہ بن جائے.. اسکی نِکی کو میں چودوں اور کہوں... کہ میں تو قیامت کو حساب دونگا... دنیا کے قوانین لاگو نہ کرو https://t.co/SEIlMfvKxD	@Official_QAS This guy is crazy. This is the solution of this country 😈😡😡Allah has made the laws of punishment in the world. I will kiss his goodness and say... that I will give an account on the Day of Judgment... Don't apply the laws of the world https://t.co/SEIlMfvKxD	NIL	NIL	Hate
1563001492679692288	اس کی ماں نے اسے آزاد جنا تھا۔ اور اس کے ذہن میں بٹھا دیا تھا کہ ملک کی زمین تو کیا ڈھیلی بھی مت دینا کسی غیر کو۔ خان قیقنس بنتا جا رہا ہے۔ اسے جتنا جلا رہے ہیں یہ اتنا ہی اس راکھ سے نکل رہا ہے۔ آگے کا پتہ نہیں فی الوقت اور فی الحال مخلوق کے قلب اس کے لیئے مسخر کر دئیے گئے ہیں۔ https://t.co/mdpOzXtRQF	His mother had born him free. And it was planted in his mind that the land of the country should not be given to anyone else. Khan is becoming a coward. The more it is burned, the more it comes out of the ashes. The future is unknown at present and the hearts of the creatures have been subjugated for this. https://t.co/mdpOzXtRQF	NIL	NIL	No_Hate
1562349116079742976	جب اللہ کسی سے ناراض ہوتا ہے تو سب سے پہلے اس کے چہرے سے رونق چھین لیتا ہے ۔اور یوں وہ شخص بے رونق ہوجاتا ہے ۔ https://t.co/zC8F6d5kuU	When Allah is angry with someone, first of all, He takes away the splendor from his face, and thus that person becomes devoid of splendor. https://t.co/zC8F6d5kuU	NIL	NIL	No_Hate
1560150656123535360	@LtAmjadShoaib عدالت کے باہر لگا ترازو اگر بول سکتا تو کہتا یا تو شہباز گل کی ماں بہن کو بھی روڈوں پہ ذلیل کرو سات آٹھ سال اس خبیث کو لاپتہ کرو پھر اس دلے کی مسخ شدہ لاش پھینک دو یا پھر سب بلوچوں کو رہا کرو https://t.co/r5P0ptJuqR	@LtAmjadShoaib The scales outside the court, if he could speak, he would have said either humiliate Shehbaz Gul's mother and sister on the roads, make this evil person disappear for seven or eight years, then throw away the mutilated body of this heart, or release all the Baloch people. ://t.co/r5P0ptJuqR	NIL	NIL	Hate
1578970588239998976	@MianNawaz_MNS چہرے والی بیمار نانی اور اس کا باپ کھاؤ جی کھوتا بھگوڑا لندن والا بیمار https://t.co/cf8W3CVsjD	Sick grandma with @MianNawaz_MNS face And his father Khao Ji Khota runaway London sick https://t.co/cf8W3CVsjD	NIL	NIL	Hate
1579910339281702912	عنوان:- "مطمئن بیغیرت" 🖐💩💩🖐 ہمارے ساتھ ذیادتی ہوئی بقول:- میاؤں بیمار شریر سانپ 🖐🤣🤣🖐 او حرامی النسل یزیدی بھکاری بےضمیر ظالم مافیائی سیاہی دان, کھوتے"ذیادتی صرف لڑکیوں/عورت کے ساتھ ہو سکتی ہے, لڑکے/مَرد کے ساتھ تو ناخوشگوار واقعہ پیش آتا ہے" 👇 https://t.co/A4bGjJI0BL	Title:- "Satisfied Begherty" 🖐💩💩🖐 We had an excess By saying:- Meow sick wicked snake 🖐🤣🤣🖐 O Harami Al-Ansal Yazidi Beggars Unscrupulous Cruel Mafia Blacksmiths, Khote "Atrocity can only happen with girls/women, with boys/men unpleasant things happen" 👇 https://t.co/A4bGjJI0BL	لے 7 دنا کاووات ریز بن انسان جو اگ رکےکھرے میں جیٹھاء 1 ارکھٹ پاکتای عوام سےکی دشا مکالیاں ناب ۔۔	Take 7 Dana kawat Riz bin Insan who is the first-born in Ag Rakekhere 1 Arkhat Paktai is a disha Makalian Naab from the people.	Hate
1593852276992614403	جب کتے آپس میں دوڑتے ہیں تو اوّل آنے والا بھی ایک کتا ہی ہوتا ہے۔ کیا اس سے کوئ فرق پڑتا ہے کہ کون آرمی چیف بنتا ہے؟ میرے خیال سے تو نہیں 😹🐕‍🦺 #Armycheif #PakArmy #Pakistani #PakistanUnderFascism https://t.co/YkE5h93xcL	When dogs race, only one dog comes first. Does it matter who becomes the army chief? I don't think so 😹🐕 🦺 #Armycheif #PakArmy #Pakistani #PakistanUnderFascism https://t.co/YkE5h93xcL	NIL	NIL	Hate
1614809737110999048	ہم نے کہے تو دیا ہمیں کیا چاہیے ہمیں مکار چورو کا ٹولہ نہیں ۔ الطاف چاہیے آج بھی پوری مہاجر قوم @AltafHussain_90 بھائی کو ہی اپنا سپہ سالار مانتی ہے ۔اور قوم نے یہ آج ثابت کر کے بھی دکھا دیا ۔۔لوو یو بھائی 🌹🌹 #الطاف_کا_بائیکاٹ_جیت_گیا https://t.co/JcdMme1c63	We gave what we needed We are not a group of cunning thieves. Altaf is needed Even today the entire migrant nation @AltafHussain_90 She considers her brother as her army chief. And the nation proved it today. Love you brother 🌹🌹 #Al-Lataf's Boycott won https://t.co/JcdMme1c63	NIL	NIL	Hate
1593112372507709441	اے میرے مستقل کی مصیبت کہاں ہوں تم چلی آؤ محبت کا تقاضا ہے 🙄 #اثاثہ_اردو https://t.co/RDGSdHNTfm	Oh, where is my permanent trouble, you go away, love is required #اثاثة_عردو https://t.co/RDGSdHNTfm	NIL	NIL	No_Hate
1560162281001992193	اس بد نسلی سنڈی بیغیرت کا پاکستان کو برباد کرنے میں بہت اھم کردار ھے لانت اس پر https://t.co/dnCmsIytsa	This evil Sindhi Beghirt has a very important role in ruining Pakistan. Damn him https://t.co/dnCmsIytsa	NIL	NIL	Hate
1593194499978977280	محمد عارف خان شکرگڑھ امیدوار (PP 48) حاجی پور کوٹھے : حاجی عبدالرحمن صاحب کی وفات پر اظہار تعزیت اور دعائے مغفرت کرتے ہوئے .اللہ تعالی مرحوم کو جنت الفردوس میں اعلی مقام عطا فرمائے اورلواحقین کو صبر وجمیل عطا فرمائے (آمین) https://t.co/wzvT04jaz9	Muhammad Arif Khan Shakargarh Candidate (PP 48) Hajipur Kothe: Expressing condolences and prayers for forgiveness on the death of Haji Abdul Rehman Sahib. May Allah grant the deceased a high place in Jannat al-Firdus and grant patience and patience to the bereaved (Amen) https://t.co/wzvT04jaz9	NIL	NIL	No_Hate
1606870799562014723	شہباز رذیل https://t.co/5WhsHbjsDz	Shahbaz Razeel https://t.co/5WhsHbjsDz	ایک ہزار قابِل إِنسان مرجانے سے إقنا نقصان نہیں ہوتا, ہوجانے سے ہوتا ہے۔ مولانا جلال الدین رُومی رحمته اللہ عليه	1000 able-bodied people are convinced to die no harm done, It happens by being. Maulana Jalaluddin Rumi may Allah bless him and grant him peace	Hate
1579408005929766912	وہ ہر جج اور ہر عدالت پیش ہوا مگر بھکاری تو جب جج کے پاس پیش ہوتا تو کہتا نظر کمزرو ہے کینسر ہے دل کا مریض ہوں شوگر ہے بڑا بھای بھاگا ہوا ہے ابھی چند ماہ پہلے کی بات ہے کچھ شرم کر قوم کو الو نہ سمجھ اپنی طرح https://t.co/SlYg8zwQZB	He appeared in every judge and in every court, but the beggar, when he appeared before the judge, he used to say that he has poor eyesight, cancer, heart disease, diabetes, elder brother has run away, it was only a few months ago. Like yourself https://t.co/SlYg8zwQZB	ریاست مدیئنہ کی مثالیں دینے والے جج اور عدالت کے سامنے پیش ہوکر جواب دینے کو تیار نہیں ہیں- وزیراعظم شہباز شریف کا لاہور میں سیرت النبی بَلكٌ کانفرنس سے خطاب, عمران خان پر تنقید 886 ریاست مدینہ کی مثالیں دینے والے جج کے سامنے پیش ہونے کو تیار نہیںءوزیراعظم	Before the judge and the court giving the examples of Madinah state Not ready to appear and answer - Prime Minister Shehbaz Sharif's speech at the Sirat-ul-Nabi-Balk conference in Lahore. Criticism of Imran Khan 886 To appear before the judge giving examples of the State of Madinah Not ready Prime Minister	Hate
1563478370989805570	مٙیں نے دیکھا ہے احرام میں لپٹا ہُوّا ابلیس https://t.co/mkITDcGbC6 https://t.co/HBFJlGiaM5	I have seen Iblees wrapped in Ihram https://t.co/mkITDcGbC6 https://t.co/HBFJlGiaM5	NIL	NIL	Hate
1557924837632479232	پچے ہم شرمندہ ہے۔ ہمارے ملک میں ہمارے محفاظ بھی چورں کے ساتھ ہے۔ بلکہ ہمارے محفاظ ہی ہمارے چور ہے #ReleaseBabyGirl #PakistanUnderFascism #امپورٹڈ_حکومت_نامنظور #شہباز_گل_کو_رہا_کرو https://t.co/UbkqjUYlob	We are ashamed of ourselves. In our country, our guards are also with thieves. Rather, our protectors are our thieves #ReleaseBabyGirl #PakistanUnderFascism #Imported_Government_Disapproved #Shahbaz_Gul_Ko_Raha_Kro https://t.co/UbkqjUYlob	۱ ہى م8 1 1	1 He is M8 1 1	Hate
1608475721109835776	اسٹیبلشمنٹ کا چمچہ پھٹ پڑا آخر کار اولاد کو برا لگتا ہی ہے جب اسکے باپ کو کوئی بیچ چوراہے ننگا کردے یہ سویلین بالادستی کا چورن بیچنے والا منافق کامران شاہد https://t.co/ELzGlmlcaM	The spoon of the establishment exploded After all, the son feels bad when his father is exposed at the crossroads This is the hypocrite Kamran Shahid who sells the loot of civilian supremacy https://t.co/ELzGlmlcaM	NIL	NIL	Hate
1593864795710693376	وزیر خارجہ بلاول بھٹو زرداری کی سیکرٹری خارجہ جوہر سلیم کے ہمراہ میڈیا سے گفتگو دفتر سنبھالنے کے بعد بہت مشکل چیلنجز کا سامنا کیا,ایک اصول رکھا کہ ہرملک سے باعزت اور عاجز طریقے سے رابطہ رکھا, جس طریقے سے پاکستان کی خارجہ پالیسی کو لے کر بڑھ رہے ہیں اس کا مثبت اثر ہوا ہے https://t.co/8PxPk2sPXL	Foreign Minister Bilawal Bhutto Zardari along with Foreign Secretary Johar Saleem talks to the media After assuming the office, he faced very difficult challenges, he kept a principle that he kept in touch with every country in a respectful and humble manner, the way in which he is developing Pakistan's foreign policy has had a positive effect https://t. co/8PxPk2sPXL	NIL	NIL	No_Hate
1606538524190298112	تم نے تنکے سمجھ کے پھونک دیا۔۔۔!! میری دنیا تھی —– آشیانے میں۔۔۔!! ✰✰ 𝓡𝓸𝓼𝓱𝓪𝓪𝓷 ✪ ｡.｡:∞♡*روشان https://t.co/7mR71yUklp	You blew straws!! My world was in the nest!! ✰✰ ✪𝓡 ｡.｡:∞♡*Roshan https://t.co/7mR71yUklp	72۳0 تم نے تنکے سمجھ کے پھونگ دیاذاا میری دنیا تمی --۔- آشیائے ھیں. 271 اھھ کح ھ ع شس	7230 You blew straws You are my world. 271 Ah What? A.S	No_Hate
1614884670562525184	فرقہ یوتھڑ کی ہر غلیظ حرکت پاک فوج روکےگے۔ #نیافرقہ_یوتھڑ https://t.co/FT7qqmyLLn	Pakistan Army will stop every dirty move of the sect. #NewFarqa_Youth https://t.co/FT7qqmyLLn	دجال کے نے ۲ راہ جوا رگکرنے والا	Dajjal's 2-way gambler	Hate
1573561284364304385	موٹر وے پر خاتون کا ریپ اس لیے جسٹیفائیڈ تھا کہ وہ رات میں اکیلی سفر کر رہی تھی، نور مقدم کا بہیمانہ قتل اس لیے کہ (صرف) وہ 'ناجائز تعلق' میں رہ رہی تھی، اب دیکھیں کہ 'جائز تعلق' میں قتل ہونے کی کیا توجیہہ دی جاتی ہے۔ شاید قتل نہ ہو شہید ہو گئی ہو۔ #sarahcase #JusticeForSarah https://t.co/WZeDNUvxeM	A woman's rape on the motorway was justified because she was traveling alone at night, Noor Muqaddam's gruesome killing because (only) she was living in an 'illegitimate relationship', now see the murder in a 'legitimate relationship'. What is the explanation for being? Maybe not killed but martyred. #sarahcase #JusticeForSarah https://t.co/WZeDNUvxeM	مار تس ری کی شیا ء شک تھا سکائسی سے ایت ے: عمزم شماہنوا کال 0.0	Mar Tasri's Shia Shak Tha Skysi Se Ait E: Umzam Shamahnawa call 0.0	No_Hate
1564724032431333376	#سوات “انقلابی امدادی و احتجاجی کمپئین کمیٹی کے ساتھی بشمول اولسی پاڅون، آر ایس ایف اور پی ٹی یو ڈی سی کے برتھانہ سوات مٹہ میں 56 متاثرین میں نقد رقوم اور اشیاء خوردونوش پر مبنی امدادی سرگرمی کے دوران۔ #kpkflood #FloodinPakistan #FloodRelief #RFRPC https://t.co/4xiaTnCPxj	#Swat "Partners of the Revolutionary Relief and Protest Campaign Committee including Olsi Poojan, RSF and PTUDC during a cash and food aid activity among 56 victims in Swat Matta." #kpkflood #FloodinPakistan #FloodRelief #RFRPC https://t.co/4xiaTnCPxj	NIL	NIL	No_Hate
1559889165763969026	جس نے ایک میڈیکل سٹوڈنٹ لڑکی کے بال کتے، جوتے چٹوآئے، مرا پیٹا اور ریپ کیا اسکی ضمانت منظور ہو گئی. کیوں کے وہ رانا ثنا کا پالتو ہے. اور شہباز گل کو مزید ٹارچر کے لئے 48 گھنٹوں کے لئے پھر ظالم پولیس کو دے دیا گیا. واہ کیا انصاف ہے، لعنت ہے ان بکاؤ ججوں پر. #شہباز_گل_کو_رہا_کرو https://t.co/hjJfRtwVeT	The bail of a medical student girl who pulled her hair, cut her shoes, beat her and raped her has been granted. Why is he Rana Sana's pet? And Shahbaz Gul was again handed over to the cruel police for 48 hours for further torture. Wow, what is justice, curse on these Bakao judges. #Shahbaz_Gul_Ku_Raha_Kro https://t.co/hjJfRtwVeT	NIL	NIL	Hate
1615585965908844547	کراچی والوں نے خان کی مقبولیت پر پان کی پچکاری مار دی 😂😂😂 #جعلی_مقبولیت https://t.co/5K5fghLofA	The people of Karachi killed Pan Ki Pachkari on Khan's popularity 😂😂😂 #fake_popularity https://t.co/5K5fghLofA	ری تا ےرس ںاو مان تن ئک یا ای یی ص2 اک راف ہیں موشل مییڈیاپ نو انہوں نے کھدتا نکو 0 میں جقادی 2 ؟؟	Believe me again Tanik or Eyi P2 is a Raf Moshal Mediyap no they dug 0 in Jakadi 2 ??	Hate
1587437549768753153	#پنجابی چوتیاپن نہ کرتے تو آج پنجابی طالبان نہ بنتے جو پورے ملک کے امن کے لیے خطرہ بنچکے جنکو وزیراعلیٰ پنجاب @CMShehbaz تک کہا کرتا تہا سواء پنجاب کے پورے ملک میں تباھی لائو کوئی روک ٹوک نہیں https://t.co/jTX3Rher7g https://t.co/ZeSGUkzUFc	If #Punjabi didn't do Chautiapan today, Punjabi Taliban would not have become a threat to the peace of the entire country. Even CM Punjab @CMShehbaz would have said that there is no stopping the entire country except Punjab. https://t.co/jTX3Rher7g https://t.co/ZeSGUkzUFc	NIL	NIL	Hate
1567029206063714304	جس پر کتا کھڑا ہو کر پیشاب کرنا اپنا توہین سمجتا ہو وہی فواد چوہدری جیسا غلیظ پالیت آج تمام اداروں کو انگلی پر نچا رہا ہے اور ریڈ زون میں باقاعدہ ایک مسلح گروپ نیازی کی دفاع کے لیے فوج سے لڑ نے کے لیے بیٹھا رکھا ہے شہباز شریف اگر خود ان سے ڈر رہا ہو ہمیں پاک فوج کے ساتھ بیج دیں؟ https://t.co/lf94oa6gj8	On whom a dog urinates while standing up considers it an insult, the same dirty filth like Fawad Chaudhry is making all institutions dance on his finger and a regular armed group is sitting in the red zone to fight with the army to defend Niazi, Shahbaz. Sharif, if he himself is afraid of them, give us badges with Pak Army? https://t.co/lf94oa6gj8	NIL	NIL	Hate
1562584717467451392	جب سے شیخ اپنی جاگیر مریم شیخ طلال بن حبشی کو اکیلے ملنے آئے پٹواری پھولے نہیں سما رہے🤣🤣 کاٹن کے سوٹ میں پھر رہے ہیں سمجھ رہے ہو نا 😂😂 https://t.co/CNlWnjagBi	Since the Sheikh owns his estate, Maryam Sheikh Talal Bin Habshi Patwari who came to meet alone is not sleeping 🤣🤣 They are walking around in cotton suits don't you understand 😂😂 https://t.co/CNlWnjagBi	NIL	NIL	Hate
1567451870418948097	7ستمبریوم الفتح اس دن دشمنان مصطفی کو مفکر اسلام حضرت مولانا مفتی محمود (رح) کے ہاتھوں شکست کھا گئے اللہ رب العزت حضرت مفتی صاحب (رح) کے قبر مبارک کو اپنے نور سے منور فرمائے تاجدارختم نبوت زندہ باد👍💞 #یوم_نجات_قادیانیت https://t.co/FhSYz70KDj	7 September Al-Fatah On that day, the enemies of Mustafa were defeated by the thinker of Islam Hazrat Maulana Mufti Mahmood (RA). May Allah Almighty enlighten the blessed grave of Hazrat Mufti Sahib (RA) with His light Long live the Prophethood #Yom_Najat_Qadianiyat https://t.co/FhSYz70KDj	NIL	NIL	No_Hate
1592838449798975491	@ovaismangalwala یہ پکچر اس وقت کی ہے جب تبدیلی کا کیڑا اندر سے باہر نکل گیا تھا مگر اب پھر تبدیلی والا کیڑا دوبارہ اندر وڑ گیا جے جہاں دلائیل کام نہ دیں وہاں دلے کام آتے ہیں 💯💯💯💯💯💯💯👇👇👇👇👇👇👇👇👇👇👇🐕🐕🐕🐕🐕🐕🐕🐕🐕 #عمرانڈوووووزززز #چوتھیا #عمرانی_واشل⭕ 💯🐕🐕🐕💯👇💯🐕⭕🐕💯 https://t.co/EW4LsjzKSM	@ovaismangalwala This picture is from when the worm of change was hatched But now again the change worm flew in J Where reason does not work, heart works 💯💯💯💯💯💯💯👇👇👇👇👇👇👇👇👇👇👇👇🐕🐕🐕🐕🐕🐕🐕🐕🐕🐕 #Umrandoooooooooooooooooooooooooooooooooooooooooooooooooooooooooooooooooooooooooooooooooooooooooooooooooooooooooood #Fourth #عمراني_واشل⭕ 💯🐕🐕🐕💯👇💯🐕⭕🐕💯 https://t.co/EW4LsjzKSM	۳ 0 سج	30 Sun	Hate
1593498742904102912	@insafpolitics1 @GhaznaviHammad عابدہ گردیزی بنی گالا کی پرانی رنڈی ہے اس کو کچھ نا کہو ے طوائفوں کی خالہ ہے https://t.co/D0n2dhyEJV	@insafpolitics1 @GhaznaviHammad Abida Gardizi is the old randi of Bani Gala, don't say anything to her, she is the aunt of prostitutes https://t.co/D0n2dhyEJV	|۸۷6۴ -ے- >> ۲۷۷۵۵۲ ۷۱۷۲ ۲٥۲۱۷	|8764 -e- >> 277552 7172 25217	Hate
1566057014689763330	عمران نیازی نے دو گھینٹوں میں 5 ارب اکٹھے کیے تو پھر 24 گھینٹوں میں 60 ارب اور ایک سال میں پورا انڈیا ھی خرید سکتے ھیں لیکن بابا جی کہتے ھیں یہ پہن چود ایسا نہیں کر سکتے کیونکہ دن میں خواب صرف مادر چود نشئی ھی دیکھ سکتے ھیں۔ #نشئی_کی_گنتی_خراب_ہے https://t.co/7ZkFRj2Qot	If Imran Niazi collects 5 billion in two rounds, then he can buy 60 billion in 24 rounds and the whole of India in one year. But Baba ji says that these can't be done because only Mother Chud Nishi can see dreams during the day. #आश्षी_की_गंती_खराब_हे https://t.co/7ZkFRj2Qot	NIL	NIL	Hate
1557962387503910913	@RehamKhan1 تیرے ھتھ کی بیدردے آیا ۔ لوگوں دے ٹٹے چک کے ۔۔ https://t.co/MlbgCedh3g	@RehamKhan1 Your hand hurt. The people gave it to them. https://t.co/MlbgCedh3g	NIL	NIL	Hate
1568911308690526208	امریکه سے آیی امداد سندھی بھاییوں کو سندھ کی هر چور دکان پر دستیاب هوگا۔۔۔۔ اصل میں یه سب چور ھی هیں۔ اور مجھے یقین هے که یه لوگ اپنی ماں کے برا سے بھی پیسے نکال لیتے هونگے سب چور۔ واقعی پاکستان کو الله کی ذات ھی چلا رهی هے۔ ورنه یه چور پاکستان بیچ چکےهوتے #لوٹنا_بندکردو_بیغرتو https://t.co/wx5tlEFR0q	Aid from America will be available to the Sindhi brothers at every shop in Sindh. Actually, they are all thieves. And I am sure that these people will take money out of their mother's evil, all thieves. Pakistan is really being run by God. Otherwise the thief would have sold Pakistan #Lotna_Bandkardo_Begharto https://t.co/wx5tlEFR0q	NIL	NIL	Hate
1587479286499483649	لا کر برہمنوں کو سياست کے پيچ ميں زناريوں کو دير کہن سے نکال دو وہ فاقہ کش کہ موت سے ڈرتا نہيں ذرا روح محمد اس کے بدن سے نکال دو فکر عرب کو دے کے فرنگي تخيلات اسلام کو حجاز و يمن سے نکال دو افغانيوں کي غيرت ديں کا ہے يہ علاج ملا کو ان کے کوہ و دمن سے نکال دو #ويكند_الرعب https://t.co/TjJIX6el9V	Bringing Brahmins into the fold of politics Get the Zanari out of Deer Kahn He is a starving man who is not afraid of death Remove the spirit of Muhammad from his body Farangi imaginations by giving the concern to the Arabs Remove Islam from Hijaz and Yemen This treatment is to give honor to Afghans Remove the mullahs from their mountains and valleys #WEEKEND_الرعب https://t.co/TjJIX6el9V	NIL	NIL	No_Hate
1596153641215344641	برہنہ ہیں سر بازار تو کیا بھلا اندھوں سے کیوں پردہ کریں ہم https://t.co/a2nPq6tFM5	Are they naked in the market? Why should we cover the blind https://t.co/a2nPq6tFM5	NIL	NIL	No_Hate
1564604179980718082	میں تیرے زہر سے واقف ہوں محبت میرا بہت نازوں سے پالا ہوا سانپ ہے تو https://t.co/LiW8L3dovm	I know your poison, love I have a very cute pet snake https://t.co/LiW8L3dovm	NIL	NIL	No_Hate
1564291140135727104	نیازی کے مذموم مقاصد کو پورا کرنے والے شوکت صدیقی کو گرفتار کرو #شوکت_ترین_کو_گرفتار_کرو https://t.co/tOMMJA9pDa	Those who serve the nefarious purposes of Niazi Arrest Shaukat Siddiqui #Shaukat_Terin_Ku_Arrested https://t.co/tOMMJA9pDa	شوکلت ترین نے اعتزا فکیا تھا کہ ام پاکتتان کے بعد سر پرسوں میں جقنا قرضہ لیاگیاہ اس کا 76 فصد بی ٹی آئی علومت نے لیا مر موصوف اب آکی ایم ایف سے علوم تکی ڈی لکو قنازع بنانے میں یش یش ہیں	Shuklat Tareen had boasted that after Umm Pakttan, the day before yesterday 76% of the loan was taken by BTI Now they are busy making science from MF	Hate
1607310596977852419	بھارت میں اقلیتیں خطرے میں، اتراکھنڈ میں ہندوتوا غنڈوں کا عیسائی پادریوں پر حملہ: https://t.co/HitOIdo9On https://t.co/rzE2lEEG9j	Minorities in India under threat, Hindutva thugs attack Christian priests in Uttarakhand: https://t.co/HitOIdo9On https://t.co/rzE2lEEG9j	ہوارت میں انیقی خنطرے میں ات اکن 07 ) بادد لال پرتھلہ	It is akin in Aneqi Khantre in Hawarat 07) Badd Lal Prathala	No_Hate
1606907044979953664	#گورنر_پنجاب_کوعہدےسےہٹاؤ #عمران_خان_ضروری_ہے #سازشیں_مکاؤ_الیکشن_کراؤ #وہ_غدار_باجوہ_تھا #امپورٹڈ_حکومت_نامنظور 75 سال سے پاکستان کو امریکہ کے پالتو کتوں(سکندر مرزا,ایوب خان, یحییٰ, مشرف اور باجوہ جیسے)سمگلر, ڈاکو, قبضہ مافیا, وطن فروش اور دہشت گرد جرنیلوں نے یرغمال بنا رکھا ھے https://t.co/0kCpugTZRZ https://t.co/SiSWAS1Lhj	#Governor_Punjab_remove from office #Imran_Khan_is_necessary #Conspiracy_Macau_Election_Krao #He_was_the_traitor_of_Bajoh #imported_government_disapproved For 75 years, Pakistan has been held hostage by America's pet dogs (like Sikandar Mirza, Ayub Khan, Yahya, Musharraf and Bajwa) smugglers, robbers, occupation mafia, patriots and terrorist generals https://t.co/0kCpugTZRZ https://t.co/SiSWAS1Lhj	ے نافع ےک وک و کے ال ۵ہ . 0007م مارک یکر نے گی ۶اا صس ‎٥٢‏ ‏کا ھن لگا دہاگیا۔ ۱ ۰ ٤:۱۲ )۷۰۷۸۷ /۵8	It is useful for a week Al 5h. 0007 AD Mark Yeker scored 6.52 He put it on. 1 0 4:12) 70787 /58	Hate
1616463508715061248	ہریپور ہزارہ صوبائی حکومت جاری کردہ فنڈ سے چنگی بانڈی کی سات جامع مساجد پر سولر کی تنصیب کا کام جاری۔اس سولر پیکج پر 49لاکھ روپے کی لاگت آے گی جو محکمہ پبلک ہیلتھ کی زیرے نگرانی مکمل کی جائیں گی۔ https://t.co/yEiRWiZ5Fs	The work of installing solar on seven mosques of Changi Bandi with the fund issued by the Haripur Hazara provincial government is going on. This solar package will cost 49 lakh rupees which will be completed under the supervision of the Public Health Department. https://t.co/yEiRWiZ5Fs	NIL	NIL	No_Hate
1565761769062146053	جب میں کال دوں آپ سب نے نکلنا ہے، عمران خان کا گجرات جلسہ میں اہم اعلان یعنی اسلام آباد بند کرنے کا پلان موجود ہے، کب اعلان ہوتا ہے یہ دیکھنا باقی ہے #سندھ_بھی_پکارے_عمران_خان https://t.co/FGUtkMx926 #سندھ_بھی_پکارے_عمران_خان	When I call, you all have to leave, Imran Khan's important announcement in Gujarat Jalsa In other words, there is a plan to close Islamabad, it remains to be seen when it will be announced #Sindh_Bhi_Pakare_Imran_Khan https://t.co/FGUtkMx926 #Sindh_also_called_Imran_Khan	NIL	NIL	No_Hate
1594790274089230352	اب کپڑے اُترنے باقی ورنہ جُھوٹے مہاتما کی وضاحت ہو چُکی کہ کہ سرکاری توشہ خانہ سے ایک نہیں دو نہیں شاید ساٹھ ستر کے قریب تحائف گھر لے گئے اور بازار میں بکتے رہے جیسے زلزلہ زدگان کا امدادی مال دکانوں پہ بکتا رہا باقی مال کی مسروقیت پتہ کرو راجہ یار کمینگی کی بھی کوئی حد ہوتی ہے https://t.co/WWOr0M4rsr https://t.co/3OZIJ4HLOo	Now the clothes have to be taken off, otherwise the false Mahatma has been explained that not one, not two, maybe sixty or seventy gifts were taken home from the official Toshakhana and sold in the market like the relief goods of the earthquake victims were sold in the shops. Find out the rest of the property Raja Yar Scarcity has its limits https://t.co/WWOr0M4rsr https://t.co/3OZIJ4HLOo	NIL	NIL	Hate
1566415516608217089	قسمیں ڈھیٹ بن کے بھی زندگی گزارنے کا ایک الگ ہی مزہ ھے 😎😜🤭🤭 https://t.co/VcAaUruUl7	It's a different kind of fun to live life even if you swear 😎😜🤭🤭 https://t.co/VcAaUruUl7	NIL	NIL	No_Hate
1571460579235368960	ہمارے تحصیل سرویکئ کےعلاقے زیارت ژی میں پاکستانی فوج کی جنگی جہاز سے بمباری،5بچے اور4خواتین مکمل چھوٹے چھوٹے ٹُکڑے ہوگئےجبکہ یہ ایک بچی زکیہ تھوڑی زخمی حالت میں ہسپتال میں ہے ظلم کےخلاف مزاحمت ہرحال میں کرینگے https://t.co/cClDxP8Qh4	In the area of ​​our tehsil Sarvikai in Ziarat Jhi, bombed by Pakistani army warship, 5 children and 4 women were completely cut into small pieces, while this one girl, Zakia, is in the hospital with minor injuries. Will resist oppression in any case https://t.co/cClDxP8Qh4	NIL	NIL	Hate
1573969578933293056	جمعیت علماء اسلام کے رکن صوبائی اسمبلی الحاج سید عزیزاللہ آغا صاحب کی دعوت پر صوبائی وزیر زراعت اسد بلوچ صاحب کا پشین ہیکلزئی چوکی کے مقام پر نئے سبزی و فروٹ مارکیٹ کا افتتاح کر رہے ہیں https://t.co/WJUDYbBzCM	On the invitation of Jamiat Ulema-e-Islam Member Provincial Assembly Alhaji Syed Azizullah Agha Sahib, Provincial Agriculture Minister Asad Baloch Sahib is inaugurating a new vegetable and fruit market at Hikalzai Chowki https://t.co/WJUDYbBzCM	NIL	NIL	No_Hate
1593568842537525248	فلسطین: غزہ کے جبالیہ پناہ گزین کیمپ میں آگ بھڑکنے سے ۷؍بچوں سمیت ۲۱؍افراد جاں بحق جبکہ متعدد زخمی ہو گئے ہیں۔فلسطینی صدر محمود عباس نے حادثے کو قومی سانحہ قرار دیتے ہوئے سوگ منانے کا اعلان کیا ہے۔ #TheInquilabNews #News #NewsUpdate #Palestine #Gaza #Jabalia #UrduNews https://t.co/WLZy66MUiy	Palestine: 21 people, including 7 children, were killed in a fire in the Jabalia refugee camp in Gaza, while many others were injured. Palestinian President Mahmoud Abbas declared the accident a national tragedy and announced mourning. #TheInquilabNews #News #NewsUpdate #Palestine #Gaza #Jabalia #UrduNews https://t.co/WLZy66MUiy	وم زین رپس میں7 تر رر ےہ کن تعددڑی ‎۲٥۵۹۱ 10 108 0 ٥ ۶۴‏ ہ_'	There are 7 different frequencies in Wm Zine Rips 25591 10 108 0 5 64	No_Hate
1564586895396552705	دو چار ہی تو ہیں دنیا میں خوشنما چہرے اک سخی کا,اک مخلص کا,اک تیرا ,اک میرا 🔥 https://t.co/fAjpvM7MbC	There are only two or four pleasant faces in the world One generous, one sincere, one yours, one mine 🔥 https://t.co/fAjpvM7MbC	NIL	NIL	No_Hate
1579233009789964288	@MansurQr مردار منہوس مردود منصور کھڈڑے کب سے پوچھ رہا ہوں۔ مردود ناسور منصور کھسرے یار یہ بتا مونچھ کے بال پلکوں پے کیسے لگائے 🙏۔ پلیز۔ https://t.co/hv41wgG34v	@MansurQr Mardar Munhos Mardud Mansur Khadde since when am I asking. Mardud Nasur Mansoor Khasre Yaar, tell me how to put mustache hair on the eyelids. please https://t.co/hv41wgG34v	NIL	NIL	Hate
1598989138648129537	خواتین کو 14سیکنڈ سے زیادہ گھورنا جرم لیکن حضرت اس قانون سے بری ہے #فحاشی_کی_دلالی_نامنظور https://t.co/sJIVSb5ABu	Staring at women for more than 14 seconds is a crime, but Hazrat is exempt from this law #फ़ाशी_की_दलाली_नाजणोर https://t.co/sJIVSb5ABu	شاو 4 سینٹھ سے زائدکھودنا جر قرار	Do not dig more than 4 cm	Hate
1614957177424465921	کیا یہ سچ ہین خان کی حکومت دوبارہ انے سے ملک تباہ ھوجاۓ گا۔ فضل کو پتہ اگر خان حکومت دوبارہ اۓ نہ مہنگائی کا بحانہ ملے نہ سازش کا موقع ملے نہ ذرداری اور نواز بچانے کا موقع ملے نہ پھر وزارت کا سچوں گا نہ لانگ مارچ کا موقع ملے گا۔ لائیک کمنٹ ریٹویٹ کریں https://t.co/RLOBmGX8ZR	Is it true that the country will be destroyed by the re-establishment of Han Khan's government? Fazl knows that if the Khan government comes again, there will be no excuse for inflation, no chance for conspiracy, no chance to save Zardari and Nawaz, neither will the ministry be truthful nor will there be a chance for a long march. Like Comment Retweet https://t.co/RLOBmGX8ZR	عحران خالن دوبارہ اقر ار سآیا تو یہ ملک تا ہو جا ےگا مولا ا شضخل ال رحمان	If Ahran Khalan came again, then this country would be destroyed It will happen Maula Ashakhal Al Rehman	No_Hate
1573533368163115010	صوابی *:-تھانہ ٹوپی پولیس کی کامیاب کاروائی، دیہہ کوٹھا میں قمار بازی کی محفل اُلٹ دی گئی۔05 جواءباز رنگے ہاتھوں گرفتار* *داو پر لگی رقم اور آلات قمار بازی برآمد، مقدمہ درج،تفتیش شروع* تفصیلات کے مطابق دوران گشت دیہہ کوٹھا قماربازی کے متعلق خفیہ انفارمیشن ملنے پر کاروائی کی ۔ https://t.co/skd7wTspJB	Swabi *:- Successful operation of police station Topi, gambling party was canceled in Kotha village. 05 gamblers arrested red-handed. * Gambling money and equipment recovered, case registered, investigation started* According to the details, action was taken on receiving secret information regarding gambling in village Kotha during the patrol. https://t.co/skd7wTspJB	NIL	NIL	No_Hate
1577701625354928128	کروڑ ہا لعنت اس نظام عدل پر کروڑ ہا لعنت اس نظام حکومت پر کروڑ ہا لعنت ہو اس مملکت کے قانون پر اور کروڑ ہا لعنت ہو ان بےغیرت اور بدنسل لوگوں پر جنہوں نے ایسے ناسوروں کو میری دھرتی پر مسلط کیا خدا غارت کرے ہر اس ہاتھ اور سوچ کو جنہوں نے میری ارض پاک کے ساتھ یہ کھلواڑ کیا https://t.co/ysj0nz5rCS	Damn this justice system Damn this system of government Curse the law of this country And millions of curses be upon those unscrupulous and despicable people who imposed such evils on my land. May God destroy every hand and thought that played with my holy land https://t.co/ysj0nz5rCS	NIL	NIL	Hate
1574360703477202944	گولیوں کی گن گرج ہو توپوں جہازوں کے بمبار ہو سخت دشمن سے سامنا ہو سخت تاریک رات ہو اور شہادت کی موت کی تڑپ ہو اور بدن کے پرخچے اڑجائے کوئی جنازہ بھی نہ پڑے نہ قبر بنائی جائے اللہ تعالی ھمیں شہادت کی موت اور سعادت کی زندگی عطا فرمائے آمین اخت عثمان https://t.co/f3Srqqel8m	Gunshots roar Gunships are bombers Face a tough enemy It's a dark night And longing for the death of martyrdom And the body parts flew away There should be no funeral No grave should be built May Allah grant us the death of martyrdom and the life of happiness, Ameen Akht Usman https://t.co/f3Srqqel8m	NIL	NIL	No_Hate
1577935580188508160	@RanaSanaullahPK #جاتی_امراء_کی_بھگوڑی نائکہ جو طوائفوں کے ذریعے اہم شخصیات کی گندی ویڈیوز بنوا کر اُن کے ذریعے اُنھیں بلیک میل کرکے اپنی کرپشن کے کیسسز بند کرواتی ہے #این_آر_او_ٹو_نامنظور #جاتی_امراء_کی_بھگوڑی https://t.co/wnD2afN11B	@RanaSanaullahPK #Jati_Amraa_Ki_Bhaguri Nayaka who important through prostitutes By making dirty videos of celebrities By blackmailing them through them It closes its corruption cases #nr_o_to_disapproved #Jati_Amraa_Ki_Bhagoori https://t.co/wnD2afN11B	NIL	NIL	Hate
1593616169294090241	گھڑی چور لعنتی عمران نیازی فڑادیا 🐕 زکوٰۃ اور خیرات پر پلنے والا 🐕 https://t.co/h5OVRHTWdV	Clock thief cursed Imran Niazi broke 🐕 who lives on Zakat and charity 🐕 https://t.co/h5OVRHTWdV	NIL	NIL	Hate
1581347005363691520	یوتھیوں کی باجی نے اپنے لیڈر کی مقبولیت کو برقرار رکھنے کے لیے بیہودہ فوٹوز شئیر کرنا شروع کر دی https://t.co/SZrrT9LlfS	Baji of youths started sharing raunchy photos to maintain their leader's popularity https://t.co/SZrrT9LlfS	, اک ×× 5:۰۹ ‎۱۸١‏ ‎٥ 60.1 ۸‏ ت, 0٭ 289ر( دااد: ‎٥19+۸۵1‏ ۸/6۲ ن>- >ے شک رر کہ ہر رر یں ۴ ند یں ‎٢ 2| 91٤0۷۳۲152493492‏ کبھی کبھی ہم تھک جاتے ہیں !!! یہ ثابت کرتے کرتے کہ بیشک ہمارا طریقہ غلط تھا پر ارادہ نہیں ٭ 0۰ 0 ئ۶ ۲۲13091816 ۸۷۲۴ ‎۷١۵٢٢ ۲٥۵۱۷ )6[‏ ۷۵۵۲ء	, a ×× 5:09 ‎181 5 60.1 8 T, 0 * 289 R (Daad: 519+851) 8/62 Doubt that everyone 4 2 2 9140732152493492 Sometimes we get tired!!! Proving that Of course, our method was wrong Not intended * 00 0 6 2213091816 8724 71522 25517 (6) 7552 AD	Hate
1560936124100517888	فوج کے خلاف پروپیگنڈا کرنے والے شاید یہ بھول گئے ہیں کہ یہ فوج ہی ہے جو ہماری محافظ ہے #NoArmyNoPakistan #BehindYouBajwa https://t.co/EAGYPRIgIH	The anti-army propagandists may have forgotten that it is the army that protects us #NoArmyNoPakistan #BehindYouBajwa https://t.co/EAGYPRIgIH	اثوان پاکتان 0-7 ایت ص0 ت7 را میں مفوبط شینے ہیں	Aswan Pakatan 0-7 vs P0 T7 Ra I am concerned	No_Hate
1566687345088372737	@AnsarAAbbasi اسلام آباد ہائیکورٹ کا آرمی چیف کی تعیناتی سے بھلا کیا تعلق؟؟ جب عمران ریاض شہباز گل جمیل فاروقی ایاز امیر اور حلیم شیخ کو اغوا کرکے ننگا کرکے تشدد کیا گیا اس وقت ان ججوں کی غیرت نہ جاگی اس وقت عوام بھی تم جیسے لفافوں اور ججوں پر بہت برہم ہے عوام کے صبر کا اور امتحان نہ لیں https://t.co/mH31a4iCG5	@AnsarAAbbasi What is the connection of the Islamabad High Court with the appointment of the Army Chief?? When Imran Riaz Shahbaz Gul Jameel Farooqui Ayaz Ameer and Haleem Sheikh were kidnapped and exposed and tortured, the honor of these judges did not wake up. At this time, the people are also very angry with envelopes and judges like you, don't test the patience of the people anymore https://t…	میں بارش کر دوں پیسے کی جو تو هو جائے میری و ل ا ‎٠۰‏ ‏آزادعر لہ زندہباد	I will rain money as much as possible Mary and 00 for Long live freedom	Hate
1568540135003770880	@jui_f_ لعنت تیری شکل پر بےغیرت امپورٹڈ امریکی کتو، غدارو، امریکی سہولت کارو۔ ڈیزل حرامی ملک کی تباہی اور بربادی کا نام https://t.co/1M9mc6iWMz	@jui_f_ Damn you shameless imported American dog, traitor, American enabler. Name the destruction and ruin of the Diesel Harami country https://t.co/1M9mc6iWMz	نام: مولاٹا قفل ا/عان پشہ: دبکن فروشی وج شہرت: مزانقت مخظل:ضراد نی 27 پندیدہکھانا: پر رکا تام مال پٹریرہ ٹریپ: ڈیدل شب ان :رات :ان دگّزکی	Name: Mulata Flock A/Aan Pashah: Scavenger hunt Waj Shahrat: Mzanaqat Mukhzal: Zarad Ni 27 Pandidakhana: Par raka tam mal Patira Trap: Daedal Shab-in: Raat: In Daggaziki	Hate
1559862722594050050	آئی سی سی نے 2023ء سے 2027ء کے لیے اپنے فیوچر ٹؤرز پروگرام کا اعلان کر دیا ہے۔ توقعات کے عین مطابق 'بِگ تھری' یعنی بھارت، انگلینڈ اور آسٹریلیا کی پانچویں انگلیاں گھی میں ہیں، جبکہ پاکستان کے لیے یہ ملا جلا سودا ہے۔ مکمل تفصیلات یہاں لنک: https://t.co/MRIBCYlh1N #CricketTwitter https://t.co/ZJo1MUWLR2	ICC has announced its Future Tours program for 2023 to 2027. As expected, the 'Big Three' ie India, England and Australia have their fifth fingers in ghee, while it is a mixed bag for Pakistan. Full details here Link: https://t.co/MRIBCYlh1N #CricketTwitter https://t.co/ZJo1MUWLR2	NIL	NIL	No_Hate
1565137169223716874	ہے کوئی۔😏 جو ایک کل پر شہر کو ہلانے کے طاقت رکھتا ہوں۔ 👑🎭🔥 جئے مہاجر-🎭👑🔥 https://t.co/m3lAdO3jf2	There is someone. 😏 Who has the power to shake the city on a day. 👑🎭🔥 Jai Mahajir-🎭👑🔥 https://t.co/m3lAdO3jf2	NIL	NIL	No_Hate
1566726421283840006	ہے کوئی ایسا لیڈر پاکستان میں جو اپنی عوام کو اتنی عزت دے؟؟؟ نیازی جیسا کوئی نہیں 🔥 https://t.co/3TVZHM3efd	Is there any leader in Pakistan who gives so much respect to his people??? There is no one like Niazi 🔥 https://t.co/3TVZHM3efd	NIL	NIL	No_Hate
1573962460020690944	میں انقلاب پسندوں کی اک قبیل سے ہوں جو حق پہ ڈٹ گیا اس لشکرِ قلیل سے ہوں میں یونہی دست و گریباں نہیں زمانے سے میں جس جگہ پہ کھڑا ہوں کسی دلیل سے ہوں وسیم بریلوی https://t.co/IZ60OjuiQM	I belong to a tribe of revolutionaries I am from this small army who stood firm on the truth I haven't been this busy since time immemorial I am where I stand for a reason Waseem Barelvi https://t.co/IZ60OjuiQM	NIL	NIL	No_Hate
1580059926902099968	@siddibbi123 @HamidMirPAK زانی باپ بیٹی https://t.co/cob2mmSiGy	@siddibbi123 @HamidMirPAK adulterous father daughter https://t.co/cob2mmSiGy	نیا زگ کی می اولاداور یی علومت دوٹوں ناحائ یں	My descendants of Naya Zag and their science Two sides	Hate
1581541656649641984	بندہ ویسے ہی منحوس ہے یا اے آر وائی کی لائٹیں نہ پڑنے سے لگ رہا؟ 👇😜🏃🏻‍♂️ #جپسی https://t.co/IZGcrlVspd	Is the person just as evil or is it because the ARY lights are not on? 👇😜🏃🏻‍♂️ #Gypsy https://t.co/IZGcrlVspd	NIL	NIL	Hate
1617827475438071809	ریاست مدینہ بنانے والے دعویداروں کا اصل گھناؤنا کردار ایسا تھا. یہ شخص سب سے بڑا منافق ہے https://t.co/sA3kzbc0nf	Such was the real heinous character of the claimants who made the state of Madinah. This person is the biggest hypocrite https://t.co/sA3kzbc0nf	NIL	NIL	Hate
1579074111367962626	ان کا لیڈر بھی اس طرح کے چوول مارتا ہے ۔روز روز نئے جھوٹ بولے جاتے ہیں۔ https://t.co/W0sVP18bho	Their leader also makes such lies. Every day new lies are told. https://t.co/W0sVP18bho	7 اع	7 A.D	No_Hate
1614488099861499905	یا تو شیر نشے میں ہے یا پھر زیبرے کے پاس شیر کی نازیبا ویڈیوز ہیں 🫢🫢🫢🤣🤣🤣 https://t.co/ZIhbtGSXYh	Either the lion is drunk or the zebra has lewd videos of the lion 🫢🫢🫢🤣🤣🤣 https://t.co/ZIhbtGSXYh	NIL	NIL	Hate
1563485897877663749	جب PTI کے ایک عام کارکن کو قانون نافذ کرنے والے ادارے اٹھاتے ہیں تو سارا پاکستان جاگ اٹھتا ہے لیکن جب اعلیٰ تعلیم یافتہ بلوچ نوجوانوں کو اٹھایا جاتا ہے تو انکو سانپ سونگھ جاتا ہے۔ یہی بنیادی مسئلہ ہے جو بلوچ کو پاکستان سے دور رکھ رہا #ReleaseLalaFaheem #ReleaseLalaFaheemBaloch https://t.co/azIDp2KmGb	When an ordinary PTI worker is picked up by the law enforcement agencies, the whole of Pakistan wakes up, but when highly educated Baloch youths are picked up, they get sniffy. This is the main problem that is keeping Baloch away from Pakistan #ReleaseLalaFaheem #ReleaseLalaFaheemBaloch https://t.co/azIDp2KmGb	NIL	NIL	Hate
1596183791491489792	قائد جمعیۃ مولانا فضل الرحمٰن کل مانسہرہ میں عظیم الشان عظمت اسلام و استحکام پاکستان کانفرنس سے خطاب کرینگے ۔ ان شاءاللہ https://t.co/4blhSBRxCJ	Quaid Jamiat Maulana Fazlur Rehman will address the Greatness of Islam and Stability of Pakistan Conference in Mansehra tomorrow. Inshallah https://t.co/4blhSBRxCJ	اط ه6 اد1ء۴ہ2۱ماںز وو“ استگیا عظمت ٭پ 6 : نت ےہر : وم ٌ2 مانسشرہ چعارروڈ ‎21.0٥. ٤‏ مآ [:۷۷۷۷۳۰۷۸ ا	At H6 Ad 1 A 4 AH 21 Manz Wu" Istagya Greatness 6 : Net Ehr: Wm ٌ2 Mansehra Chaar Road 21.05. 4 MA [:77773078 A	No_Hate
1617784125611724803	گستاخ مگر کاٹ کھانے والی آنکھیں اور سیکسی بدن https://t.co/4wkEDlPWkb	Cheeky but biting eyes and sexy body https://t.co/4wkEDlPWkb	NIL	NIL	No_Hate
1579856062181969920	@ImranRiazKhan جب اچانک کسی پٹواری کا بڑا لوڑا نظر آجائے تو یو تھن کی شکل ایسے ہو جاتی ہے😜😜😜 https://t.co/WK05xwaSTo	@ImranRiazKhan When a big lump of Patwari suddenly appears, U Than looks like this 😜😜😜 https://t.co/WK05xwaSTo	NIL	NIL	Hate
1580098990670249984	سہ فریقی سیریز: بنگلہ دیش کو شکست، کیویز نے فائنل کا ٹکٹ کٹوالیا #NZTriseries #NZvBAN #Cricket https://t.co/EyMpPsnomF https://t.co/kjjBHT87hu	Tri-series: Kiwis beat Bangladesh, clinch ticket to final #NZTriseries #NZvBAN #Cricket https://t.co/EyMpPsnomF https://t.co/kjjBHT87hu	NIL	NIL	No_Hate
1608492933140865024	مجھے ایک بات کی سمجھ نہیں آتی، جو لڑکیاں نیم برہنہ واحیات قسم کی تصاویر لگا کر بیہودہ سوال پوچھتی ہیں لوگ کیوں ایسے گند کو لائق اور شئیر کرتے ہیں؟؟ خدارا معاشرے کو بہتر بنائیے اپنی ذمہ داری نبھائیے، سوشل میڈیا ہم نہیں چھوڑ سکتے آج کے دور میں لیکن گندگی کی حوصلہ شکنی کر سکتے ہیں۔ https://t.co/1pbzM738vz	I don't understand one thing, the girls who post semi-nude pictures and ask stupid questions, why do people deserve and share such rubbish?? God please take your responsibility to improve the society, we can't leave social media in today's age but we can discourage filth. https://t.co/1pbzM738vz	NIL	NIL	No_Hate
1608023199371137024	ٹی ٹی پی بھی پاک فوج کے نقل کرنے کی کوشش کر رہی ہے لیکن انہیں ایک بات واضح ہونی چاہیے کہ فوج ایک ریاستی ادراہ ہے اور ٹی ٹی پی خوارج ہے۔ ٹی ٹی پی ایک دہشت گرد تنظیم ہے، جو کبھی بھی ریاستی اداروں کی طرح عوام کی فلاح و بہبود کے لیے کام نہیں کر سکتی۔ #ttp_on_the_run https://t.co/TqO7p8TNBf	TTP is also trying to imitate Pakistan Army but they should be clear about one thing that Army is a state institution and TTP is Khawarij. TTP is a terrorist organization, which can never work for the welfare of the people like state institutions. #ttp_on_the_run https://t.co/TqO7p8TNBf	"س۶ت بھی سی ات ادا یم 7 2 2	"Sixt I'm paying for it too 7 2 2	No_Hate
1565220198319357952	@ItsFSW @WaqarAs98674067 بھائی جان یہ دکھائیں ان ذلیلوں کو کہ سعد رضوی کو عدالت نے تو رہا کر دیا تھا لیکن ان کے ڈرپھوک اور بزدل لیڈر نے رہا نہیں کرنے دیا۔ ان کا ذلیل لیڈر ان کو بس جھوٹ کے لولی پاپ دے سکتا ہے اور کچھ نہیں، کیوں کہ میں بھی 8 سال اسی جہالت میں رہا ہوں۔ اللہ پاک معاف فرمائے۔ آمین۔۔ 🤲🤲 https://t.co/5juzhwXTVv	@ItsFSW @WaqarAs98674067 Brother show these disgraced people that Saad Rizvi was released by the court but his cowardly and cowardly leader didn't let him. Their disgraced leader can only give them lollipops of lies and nothing else, because I too have been in the same ignorance for 8 years. May Allah forgive you. Amen 🤲🤲 https://t.co/5juzhwXTVv	کے ا ا	K.A	Hate
1578056965963583490	زرداری نے بولا بیٹی کو خالی پیٹ نہیں رکھنا لڑکے نے سیرئیس لے لیا بات کو۔ سپیڈ چیک کرو بختاور بھٹو زرداری اور محمود چوہدری کی شادی 31 جنوری 2021 کو ہوئی تھی، ان کے ہاں پہلے بیٹے کی پیدائش اکتوبر 2021 میں ہوئی تھی۔ https://t.co/mkHPsPD79F	Zardari said that the daughter should not be kept on an empty stomach The boy took it seriously. Check the speed Bakhtawar Bhutto Zardari and Mahmood Chaudhry got married on 31 January 2021, and their first son was born in October 2021. https://t.co/mkHPsPD79F	NIL	NIL	No_Hate
1568122991988408321	وکلا کا اپنے دلائل میں مزید کہنا تھا کہ استغاثہ کے گواہوں کے شواہد میں واضح تضاد ہے، لاش کا پوسٹ مارٹم بھی نہیں کرایا گیا جب کہ جائے وقوعہ کا میمو نہ ہونے کی وجہ سے جرم کا مقام بھی متنازع ہے۔ https://t.co/z34anX1ASq https://t.co/O8yF0XXa65	The lawyers further said in their arguments that there is a clear contradiction in the evidence of the prosecution witnesses, the post-mortem of the body was not even conducted, while the location of the crime is also disputed due to the absence of a crime scene memo. https://t.co/z34anX1ASq https://t.co/O8yF0XXa65	سندھ ہائی کورٹ 1.	Sindh High Court 1.	No_Hate
1593790882851225600	پاک فوج کے سربراہ نے پاکستان ملٹری اکیڈمی کاکول اور بلوچ رجمنٹ سینٹرایبٹ آباد کا الوداعی دورہ کیا ۔ https://t.co/ElHn2e2Bbk	The Chief of Army Staff paid a farewell visit to Pakistan Military Academy Kakul and Baloch Regiment Center Abbottabad. https://t.co/ElHn2e2Bbk	9 جنرل باجوەی خدمات جزل باج ہ کی ہدایت پر پاک فوع نے ‎0٥00‏ اور وزارت 7 0 بت (۔۰۰ شر مر ا ٭ ‎ -‏ ص203 لپ سالال: ترنل۔باجوہ ا ھ	9. General administrative services On the instructions of Jazal Bajah, Pak Faw 0500 and the ministry 70 Idols Death - p. 203 Lip Salal: Tarnal. Bajwa A H	No_Hate
1565038270211301381	@hinaparvezbutt بد ذات لنگور بیکار کی بکواس بند کر اور گھوڑی بن کے چوتڑ اونچے کر کے موریم کو 21 پد مار کر سلامی پیش کر۔ https://t.co/VEe5oVJKUo	@hinaparvezbutt stop the nonsense of the bad-caste langur and raise your mare's hooves and give a 21-pad salute to Mauryam. https://t.co/VEe5oVJKUo	NIL	NIL	Hate
1567453359874969607	یہ وہی منہوس ہے جس نے عوام سے جھوٹے وعدے کی #پاکستان_دشمن_ہوا_مسترد https://t.co/rHPQwiwUuv	This is the Manhos who made false promises to the people #Pakistan_enemy_was_rejected https://t.co/rHPQwiwUuv	یہ ہے وہ بندہ ج٘ سکو نوازشریف بتارسی ٹن ککہہ 3 ء2 7 2 1 1	This is the person who knows Nawaz Sharif from Sarsi Ton Kakkaha 3 2 7 2 1 1	Hate
1578742860475961346	@CHGHULAMHUSAlN پی ٹی آئی کے ساتھ لونگ مارچ میں تم بھی آنا تمھارے پچھواڑے کا یہ حال کرکے بھیجیں گے ثابت شدہ منافق اسلام دشمن پاکستان دشمن غدار یہودی ایجنٹ عمران اور تم جیسے غداروں پر لعنت بیشمار https://t.co/Vx0kTUXnm1	@CHGHULAMHUSAlN You will also come to the Long March with PTI and send your ass like this. A proven hypocrite, an enemy of Islam, an enemy of Pakistan, a traitor, a Jewish agent, cursed on traitors like Imran and you https://t.co/Vx0kTUXnm1	NIL	NIL	Hate
1564952056212897803	آرمی چیف کا کہنا تھا کہ سیلاب کے شدید نقصانات کی اسسمنٹ ابھی ہونی ہے، سیلاب سے بڑے پیمانے پر ہونے والے نقصانات کی اسسمنٹ کے لیے سروے ضلعی انتظامیہ، صوبائی حکومتیں اور فوج مل کر کریں گے۔ #COASAppeal #PakArmyRelFund https://t.co/QTrkcbnZso	The army chief said that the assessment of severe flood damage is yet to be done, the survey will be done by the district administration, provincial governments and the army together to assess the large-scale damage caused by the flood. #COASAAppeal #PakArmyRelFund https://t.co/QTrkcbnZso	سے ہیں ا٥‏ 06م۲60۸9۸ پاک آرمی سیلاب زدگان کو امدادی سامان پہنچا ربی ہے اور ریسکیو کر ‎۷۰۷٦٥٦‏ کو میں فوج عواح کے ساتھ نے	From A5 06 M260898 Pak Army helps flood victims The goods are delivered and rescued On 707656 With the army	No_Hate
1566611640053039104	اے غیرتِ مریم ۴ تیرا بازار میں جانا نہ بھول سکے گا اِسے تاحشر زمانہ #اسیرانِ_کربلا تلوار کے بغیر لڑوں گی میں ایسی جنگ ، خطبے پڑھوں گی ایسے کہ دشمن بھی ہونگے دٙنگ ، دیکھو حسینؑ تم بھی ہمارے جہاد کو، زینبؑ ہے آج بن کے علمدار آگئی ۔ سلام یا ثانی زھراؑ.. 🙌🏴 https://t.co/KkkeDbe7vE	O honor of Maryam 4 your going to the market He will not be able to forget it forever #Captives of Karbala I will fight such a battle without a sword, I will read the sermons in such a way that even the enemies will be stunned. Hussain, look at our Jihad too. Zainab (A) has come today. Salaam Ya Sani Zahra.. 🙌🏴 https://t.co/KkkeDbe7vE	بای کے انپت ہت سج کم کچ ٹر پٹ ری جس تھے سی کا	Anpat of Bai Hat Saj Less than 100% of the return was from c	No_Hate
1567931479333765121	@ImranRiazKhan ایک بیوہ بہن کی آپ سب سے اپیل یتیم بچوں کیلئے گھر میں راشن نہیں یہ خود بھی بیمار رہتی ہیں مخیر حضرات سے تعاون کی اپیل آگے بڑھیں یتیم بچوں کے سر پر ہاتھ رکھیں نبیﷺ نے فرمایا: "صدقہ کرنے سے مال میں کمی نہیں آتی (مسند احمد : 9190) ایزی پیسہ اکاؤنٹ 03115008363 https://t.co/g0VWOJxGso	@ImranRiazKhan appeal to all of you from a widowed sister, there is no ration at home for orphans, she herself is sick. Call for support from philanthropists, go ahead and put your hands on the heads of orphans The Prophet said: "Charity does not diminish wealth (Musnad Ahmad: 9190) Easy Money Account 03115008363 https://t.co/g0VWOJxGso	NIL	NIL	No_Hate
1578975043605782530	امپورٹڈ حکومت کو سمجھ نہیں آرھا اب کیا کرنا ہے سندھ کو تباھ پی پی پی نے کیا ہم سندھ کا ہے سندھ میں سرکاری کوئی چیز کا نام نہیں #لعنتی_لفافہ_صحافی https://t.co/3URSQwgNew	Imported government does not understand what to do now Sindh has been destroyed by PPP, we belong to Sindh, there is no official name in Sindh.	NIL	NIL	Hate
1580678511919915009	یہ کہتی ہے کہ چھٹی والے دن گھر میں بیٹھا ہوا خاوند بھی چھوٹی موٹی ساس ہوتا ہے 🤣 https://t.co/locIiAXozX	It says that a husband who is sitting at home on a holiday is also a small mother-in-law 🤣 https://t.co/locIiAXozX	NIL	NIL	No_Hate
1596119157233561600	#ضلعی__دفتر__پشین #امیر جمعیت علماء اسلام ضلع پشین مولانا عزیز اللّٰہ حنفی صاحب کی زیر صدارت ضلعی مجلس عاملہ کا اجلاس جاری ہے اجلاس میں جماعت کی فعالیت اور دیگر امور پر غور وخوض ہوگا۔ https://t.co/7QoL80gr9d	#District__Office__Pushin #Ameer Jamiat Ulema-e-Islam, district Pashin, under the chairmanship of Maulana Azizullah Hanafi, the meeting of the district council is going on. https://t.co/7QoL80gr9d	NIL	NIL	No_Hate
1578390056741605377	ڈاکو رانی اور کینیڈا یونیورسٹی سرٹیفائیڈ چور ایک فریم میں @IftikharDurani @SHABAZGIL https://t.co/gYDgpYwURX	Dako Rani and Canada University Certified Thief in one frame @IftikharDurani @SHABAZGIL https://t.co/gYDgpYwURX	NIL	NIL	Hate
1587757763542802433	ایک دن اور ایک رات سرحد پر پہرہ دینا، ایک ماہ کے روزوں اور قیام سے بہتر ہے. اور اگر وہ (پہرہ دینے والا) فوت ہوگیا تو اس کا وہ عمل جو وہ کر رہا تھا، جاری رہے گا. اور اس کے لئے اس کا رزق جاری کیا جائے گا، اور وہ ( قبر میں) امتحان لینے والے سے محفوظ رہے گا. مسلم 4938 (ترمذی 1665) https://t.co/tAG7xzPFW2	Guarding the border for one day and one night is better than fasting and staying for a month. And if he (the watchman) dies, then the action he was doing will continue. And his sustenance will be issued for him, and he will be safe (in the grave) from the examiner. Muslim 4938 (Tirmidhi 1665) https://t.co/tAG7xzPFW2	٦	6	No_Hate
1593626191222788101	آرمی چیف جنرل قمر جاوید باجوہ کی قیادت میں پاک آرمی نے دہشت گردی کے خلاف کئی آپریشن کیے اور کامیابی حاصل کی۔ #باجوہ_ہمارا_فخر https://t.co/3kbH2Hbh86	Under the leadership of Army Chief General Qamar Javed Bajwa, Pakistan Army conducted several operations against terrorism and achieved success. #Bajoh_our_pride https://t.co/3kbH2Hbh86	سس و لت بت ےور2رواھ 0 سد اداکری سے اور ان مقیرت ہیں شک رکی ے ے	Sis wa Lat idol Aur 2 Rawah 0 Sad Doubts are due to acting and these are muqirat	No_Hate
1593474493800157189	@soldierspeaks اس سرزمین پر منافقین اور غدار بھرے پڑے ہیں۔ جو ٹکے ٹکے کے فائدہ کیلئے اپنے کمانڈر ۔اپنے لیڈر۔۔اپنے وزیراعظم کی پیٹھ میں چھرا گھونپتے ہیں۔۔ تاریخ ان جیسے کرداروں سے بھری پڑی ہے۔۔ https://t.co/ZLxegcs6Qs	@soldierspeaks this land is full of hypocrites and traitors. Those who stab their commander, their leader, their prime minister in the back for the benefit of tikke tikke. History is full of characters like him. https://t.co/ZLxegcs6Qs	لڑ رہا تھا اور میرا سالار بک گیا۔۔ ٦	I was fighting and my salar was sold. 6	Hate
1564203202093916160	مجھے سمجھ نہیں آتی کہ اللہ نے ان میں کیا خاص رکھاکہ ان کے علاوہ ملک چلانے کی کسی میں اہلیت نہیں ۔باقی سارے پاکستان کے بچے الو ہیں کیا یا معذور ہیں؟؟ https://t.co/k36MshTzgI	I don't understand what Allah has made special in them that no one has the ability to run the country except them. Are all the children of Pakistan orphans or are they disabled?? https://t.co/k36MshTzgI	۶ ۹۹ سٍس ‎ )‏ ‏۱ 7۸ اوررےُل کت ا کرای کے لئے ون لس میں؟ 3	6 99 sis 1 78 Orrel A cat One for rent In ten? 3	Hate
1573950555348680705	ملک پر ڈاکو راج قائم کرنے کا شکریہ. #امپورٹڈ_حکومت_نامنظور https://t.co/W0gKHLypvB	Thanks for establishing bandit rule over the country. #imported_government_disapproved https://t.co/W0gKHLypvB	NIL	NIL	Hate
1566740735826837505	میں چپ تھا کہ برباد نہ ہو جاۓ گلشن کا سکون۔۔! نادان سمجھ بیٹھے مجھ میں قوتٍ للکار نہیں ۔۔! اللہٗ اکبر #اب_صرف_عمران_خان https://t.co/h94weSWDCw	I was silent so that Gulshan's peace would not be ruined! I don't have the power to challenge the ignorant! Allah is great #ab_only_imran_khan https://t.co/h94weSWDCw	NIL	NIL	No_Hate
1558129978914623496	فیض آباد میں جب پولیس والوں نے نواز زلیل کی ایما پر ظلم کے پہاڑ توڑ دیے لیکن ہمارے پیارے بابا جان نے کہا تھا کہ یہ اپنے بچے ہے آپ نے انکو کچھ نہیں کہنا جب کہ عمران نیازی نے کہا تھا کہ جو پولیس والا میرے بندوں کو مارے گا میں خود اسے پھانسی دوں گا۔ #Labbaik_Faizabad https://t.co/VDcLT1ECjY	In Faizabad, when the police brutalized Nawaz Zalil's mother, but our dear Baba Jan said that this is his child, he did not say anything to them, while Imran Niazi said that the policeman told my servants. I will kill him myself. #Labbaik_Faizabad https://t.co/VDcLT1ECjY	NIL	NIL	No_Hate
1565760119362691074	@Sumaira_Pti2 پی ٹی آئی کی عمران خان کی وفادار چیتی شہزادی حسین ،خوبصورت،دلنشیں،دلربا و دلفریب سمیرا شہزادی https://t.co/q7O9mzUXQf	@Sumaira_Pti2 PTI's Imran Khan's Loyal Cheetah Princess Hussain, beautiful, charming, charming and charming Samira Princess https://t.co/q7O9mzUXQf	NIL	NIL	No_Hate
1564154197490237440	السلام علیکم ! آپ پاکستان کا اثاثہ ہیں میں آپکو دعوت دیتی ہوں کہ ٹوئٹر کو اپنا ہتھیار بنا کر وار فئیر میں پاکستان 🇵🇰 کی حفاظت کریں ٹریڈ ٹیم @TeamiPians میں شامل ہو کر اسلام، پاکستان، عمران خان کی ہر سطح پر سپورٹ کریں۔ ٹیم میں شامل ہونے کیلئے کمنٹ میں YES لکھیں۔ https://t.co/F7Kih6ru1n	Peace be upon you! You are an asset of Pakistan, I invite you to use Twitter as your weapon to protect Pakistan 🇵🇰 in war. Trade Team @TeamiPians Join us and support Islam, Pakistan, Imran Khan at every level. Write YES in the comments to join the team. https://t.co/F7Kih6ru1n	NIL	NIL	No_Hate
1567079547991982081	یہاں پر ہر چیز ختم ہوتی ہے ، پیسہ ، وقار ،عزت ،اکڑ ،غرور، نفر ت اور منصب اور صرف عمل باقی رہتا ہے .. اللّٰہ ہمارا خاتمہ ایمان پر نصیب فرمائے 🤲 آمین https://t.co/fHF6DNa3zJ	Everything ends here, money, dignity, honor, arrogance, pride, hatred and position and only action remains.. May Allah grant us our end on faith 🤲 Ameen https://t.co/fHF6DNa3zJ	NIL	NIL	No_Hate
1587397400121016323	اے این پی نے طالبان کے ساتھ مذاکرات کی حمایت کردی https://t.co/VfzGWwVPrB https://t.co/Tmor7Chtv5	ANP supports talks with Taliban https://t.co/VfzGWwVPrB https://t.co/Tmor7Chtv5	NIL	NIL	No_Hate
1558014794380214274	پولیس بار بار مجھ سے پوچھتی رہی کہ حنا پرویز بٹ کے بیٹے کی شکل تم سے کیوں ملتی ہے؟ شہباز گل کا جج کے رو برو بیان😂😂😂 https://t.co/RCaHK3Ahue	The police kept asking me again and again why Hina Parvez Butt's son looks like you? Shahbaz Gill's statement in front of the judge😂😂😂 https://t.co/RCaHK3Ahue	NIL	NIL	Hate
1560903744912605185	بیان میں بتایا گیا کہ مارے گئے دہشت گرد سیکیورٹی فورسز کے خلاف دہشت گردی کی کارروائیوں، دیسی ساختہ بم (آئی ای ڈیز) کی تیاری کےعلاوہ کمانڈر خبیب اگست 2022 میں میر علی میں سیکیورٹی فورسز کے قافلے پر خودکش حملے میں بھی ملوث تھا۔ https://t.co/y1PfM6VHVf https://t.co/U8iGrZrwrB	The statement said that the slain terrorists were involved in terrorist activities against the security forces, apart from preparing improvised explosive devices (IEDs). Commander Khabib was also involved in a suicide attack on a convoy of security forces in Mir Ali in August 2022. https://t.co/y1PfM6VHVf https://t.co/U8iGrZrwrB	سیکیورٹی فورسز اور دہشت گردوں کے درمیان فائرنگ موم شہریوں کے قتل میں 7 رہنے والے حافظ گل بہادر گروپ کے دہشت گرد کمانڈر خبیب عرف بلال سمیت 2 دہشت گرد مارے گئے	Firefight between security forces and terrorists 7 living in wax civilian killings The terrorist commander of Hafiz Gul Bahadur group 2 terrorists including Khabib alias Bilal were killed	No_Hate
1578960956863881217	بلوچوں کی ثقافت تہذیب و تمدن کو غیر بلوچوں کے نام پر بد نام کیا جارہا ہے لسبیلہ یونیورسٹی آف ایگریکلچر میں لڑکے اور لڑکیوں کے ایک ساتھ ڈانس پارٹی کی جتنی مذمت کی جاۓ کم ہے یونیورسٹی انتظامیہ کے خلاف بھی سخت کاروائی ہونی چاہیے کہاں ہیں ہمارے عزت اور ناموس کی باتیں کرنے والے https://t.co/T8ORWjc7Qt	The culture and civilization of Baloch are being given a bad name in the name of non-Baloch. The dance party of boys and girls together in Lasbela University of Agriculture is less to be condemned. Strict action should be taken against the university administration. Where is our honor? And honor talkers https://t.co/T8ORWjc7Qt	سی نت 3ے ۵۶۵ ۷۷م یلق ایی کک لف کا	C Net 3 565 of the 77th century	No_Hate
1558941819412443136	لہروں سے لڑتے ہیں ہم دریا میں اتر کر🔥 ساحل پہ کھڑے ہو کر سازش نہیں کرتے✌ #ik https://t.co/KYjimbpkKk	We fight the waves and get down in the river They do not plot by standing on the beach #ik https://t.co/KYjimbpkKk	NIL	NIL	No_Hate
1578737503057559552	ماشاللہ ولی باغ کی پانچویں نسل اتل ولی خان بھی میدان میں آگۓ فخر افغان باچا خان رہبر تحریک خان عبدالولی خان ملی مشر اسفندیار ولی خان ایمل ولی خان اتل ولی خان زمرک ولی خان زندہ باد عوامی نیشنل پارٹی زندہ باد https://t.co/WWBcfxwuk9	Mashallah the fifth generation of Wali Bagh Atul Wali Khan also entered the field, Fakhr Afghan Bacha Khan, Leader of Tehreek Khan, Abdul Wali Khan, Milli Mishra, Asfandyar Wali Khan, Amil Wali Khan, Atul Wali Khan, Zamrak Wali Khan, Long live the Awami National Party, Long live the Awami National Party https://t.co/WWBcfxwuk9	NIL	NIL	No_Hate
1566394380008693761	@PTVNewsOfficial @Marriyum_A یہ پی ٹی وی نیوز ہے یا ہیرامنڈی سے وزیراطلاعات بننے والی رنڈی معیم اورنگزیب کی ذاتی جاگیر؟ https://t.co/CVnUmCnV3P	@PTVNewsOfficial @Marriyum_A Is this PTV News or the personal estate of Randi Moeem Aurangzeb who became Information Minister from Hiramundi? https://t.co/CVnUmCnV3P	NIL	NIL	Hate
1580194589322772481	@akeelbaloch786 @ramzeeraja @OryaMaqboolJan اپنی باجی کی چوتڑ دیکھ دلے ۔ ویسے تیرا لنگڑا بھی بہت گالیاں دیتا تھا۔ ایک نمبر کا حرامی تھا۔ https://t.co/hli4eleNSC	@akeelbaloch786 @ramzeeraja @OryaMaqboolJan let me see your sister's butt. By the way, your lame person used to abuse a lot. He was a number one thief. https://t.co/hli4eleNSC	NIL	NIL	Hate
1560896914853400577	عمران نیازی نے بتایا کہ جیل میں شہباز گِل کے ساتھ جنسی زیادتی کی گئی "تو ساتھ کھڑے مراد سعید کی آنکھیں باہر آ گئیں" 🙄🙈🤔🙄😂🙈🤔🙄😂🙈🤔🙄😂🙈🤔🙄 https://t.co/Rn6gWhRgz4	Imran Niazi said that Shahbaz Gill was sexually assaulted in the jail "so Murad Saeed's eyes came out". 🙄🙈🤔🙄😂🙈🤔🙄😂🙈🤔🙄😂🙈🤔🙄 https://t.co/Rn6gWhRgz4	NIL	NIL	Hate
1616013905242750978	@arifhameed15 دال میں کچھ کالا ہے https://t.co/V1wM8CMmtc	@arifhameed15 There's something black in the lentils https://t.co/V1wM8CMmtc	NIL	NIL	No_Hate
1559878931095879680	تمام دوست توجہ کریں لمپی سکن ایک خطر ناک بیماری ہے۔ پہاڑ پور اور پورے ضلع لیہ اور بھکر میں یہ وبا کافی پھیل چکی ہے مہربانی کریں احتیاط اپنائیں بڑا گوشت اور دودھ کا استعمال نہ کریں ۔ اپنے آپ کو صاف ستھرا رکھنے کی کوشش کریں ۔ اللہ پاک ہم سب کی حفاظت فرمائے آمین https://t.co/5DicvknuvG	Attention all friends Lumpy skin is a dangerous disease. This epidemic has spread in Paharpur and the entire district of Leh and Bhakkar. Try to keep yourself clean. May Allah protect us all Amen https://t.co/5DicvknuvG	NIL	NIL	No_Hate
1616018192346013696	پنجاب کیٹل مارکیٹ مینجمنٹ اینڈ ڈویلپمنٹ کمپنی کے زیرانتظام مویشی منڈیوں میں چارہ سیل پوائنٹس قائم ہیں جہاں پر کنٹرول ریٹس پر چارہ فروخت کیا جاتا ہے۔گوجرانوالہ ڈویژن کی مویشی منڈی،منڈی بہاوالدین میں جانور تازہ چارہ کھارہے ہیں۔انتظامیہ پی سی ایم ایم ڈی سی https://t.co/2VjFLqyN2p	Fodder sale points are established in cattle markets under the management of Punjab Cattle Market Management and Development Company where fodder is sold at controlled rates. Animals are eating fresh fodder in Mandi Bahauddin, cattle market of Gujranwala division. Management PCM MDC https://t.co/2VjFLqyN2p	NIL	NIL	No_Hate
1592527530296500226	عزیزم دیسی لبرل/سیکولر: سلام مسنون'امید ھے آپ بخیروعافیت ہوں گے۔ آپ کو اطلاع دینی مقصود تھی کہ الحمدللہ پاکستان کی 22 کروڑ عوام فلم "جواے لینڈ" ریجیکٹ کر دی ھے۔ انشاء اللہ آپ اپنے مذموم مقاصد میں کبھی کامیاب نہیں ہو سکتے۔ بھابی کو سلام'بچوں کو پیار وسلام #Softwareupdate https://t.co/5UJVRXedvu	Dear Desi Liberal/Secular: Hello Masnoon, I hope you are doing well. It was intended to inform you that Alhamdulillah 22 crore people of Pakistan rejected the movie "Joyland". God willing, you can never succeed in your nefarious purposes. Greetings to the sister-in-law, love to the children Greetings #Softwareupdate https://t.co/5UJVRXedvu	۱ پاکتان می دیال رلک تد گکاگل _] 7 ذہبے دورل 1 گی سے 0۰ یھ	1 Pakatan Me Dayal Rlak Tad Gkagal _] 7 Dahbe Dooral 1 Gay to 00 This	Hate
1593516933458300929	وہ انتظار کر رہا ہے کہ تم جیسے تمام نیچ اور جھوٹے سیاست دان اپنی اپنی الزام تراشی کر لیں تو سب کو ایک ہی بار نبٹنے کے لئے عدالت جائے گا۔ ویسے بھی تم لوگوں کو دوڑا دوڑا کر ہی مارے گا۔ https://t.co/p0E2y4IbT2	He is waiting for all the vile and lying politicians like you to finish their accusations, then he will go to court to deal with them all at once. Anyway, you will kill people by running around. https://t.co/p0E2y4IbT2	ھی ری کت بے پمراات جا کااعلا نکیا تھء او ٰ مشاورت 2ھیی.' ' رر ۲ ِسٔ مقلزمہ دائ کریں گے۔اعلا نکوایک دن ۴ ۱ گزد چا ہے ۔آج لانگ مارق ےخطاب ---- ٹس اتظار تھاکہ عدالت جات ےکی تا کا ‎٣‏ ۲ ۱ اعاا نگمرمیں گے جو میں ہوا ۱ 58۷۰۰٣۹۰ ‏"ال ٭×ضزور انا‎ ‏رین 0000067-7 ا ک‎ پاکستانق	Hey Rikat Bay Pamraat Did you go to the consultation? 2 Hi.' 'Rrr 2 They will give this muqalizma. Ala Niko one day 4 1 What is the policeman? It was expected that the courts would be 3 2 1 I will tell you what happened 1 58700390 "Al-Duzur Ana". Ren 0000067-7 ak Pakistan	Hate
1606696159510237185	لالچی انسان کسی حال میں بھی خوش نہیں رہ سکتا لالچی کو کبھی سکون میسر نہیں #PTI_PDM_GreedyForPower https://t.co/G5AvX5e7tn	A greedy person cannot be happy in any situation The greedy never finds peace #PTI_PDM_GreedyForPower https://t.co/G5AvX5e7tn	NIL	NIL	No_Hate
1558076567523319808	کافر کافر کے فتوے بانٹنے والو، مبارک ہو آپ کی دعا رنگ لے آئی اور اک اور بیگناہ شخص اس مذہبی شدت پسندی کی نظر ہو گیا۔ اللہ جانتا کون کیا ہے اور کس کا کیا مزہب و مسلک ہے۔ خدارہ اسلام کے نام پے لوگوں کی جانیں لینا بند کرو۔ اسلام امن کا دین ہے اور امن کا درس دیتا ہے۔ https://t.co/RLbauaazkI	Those who distribute the fatwas of infidel infidels, congratulations, your prayers have come true and another innocent person has become the victim of this religious extremism. Allah knows who is what and who has what religion. God, stop taking people's lives in the name of Islam. Islam is a religion of peace and teaches peace. https://t.co/RLbauaazkI	NIL	NIL	No_Hate
1598924357489004544	. 🔥🌹*میری محبّت کو تم کیا آزماؤ گے * 💖🥰 😍💖 *جان سے زیادہ اور کیا مانگ پاؤ گے *💖🥀 💕💕 . 🥳❤*میری محبّت ستاروں جسی ہے*💖👑 . 🥰💖 *کیا تم ان ستاروں کو گن پاؤ گے *💖🌹 #اثاثہ_اردو https://t.co/Yg923LvgLL	. 🔥🌹 * What will you test my love * 💖🥰 😍💖 *What more can you ask for than life *💖🥀 💕💕 . 🥳❤ *My love is like the stars*💖👑 . Can you count these stars? #اثاثة_عردو https://t.co/Yg923LvgLL	NIL	NIL	No_Hate
1567924552197349377	کیا راہل گاندھی کا تمل ناڈو سے کشمیر تک پیدل مارچ پارٹی کی قسمت بدل سکے گا؟ تفصیل پڑھیں: https://t.co/qrhgn0T4Hl https://t.co/0a2I86WkBJ	Will Rahul Gandhi's foot march from Tamil Nadu to Kashmir change the fortunes of the party? Read details: https://t.co/qrhgn0T4Hl https://t.co/0a2I86WkBJ	NIL	NIL	No_Hate
1563805486276902912	جناب @ImranRiazKhan سوال کرتے ہیں جواب مانگتے ہیں تو جسمانی، جنسی ، ذہنی تشدد کرتے ہیں ۔ لیکن کیا کریں غیرت گوارا نہیں جو کرتی کس طرح منہ پر پر ٹیپ لگا کر خود کو بے ضمیر بنا لیں۔ اب کدھر جائیں ۔ چپ رہتے ہیں تو ضمیر ملامت کرتا ہے ، جواب مانگتے ہیں تو جان سے جاتے ہیں 😭 https://t.co/WurWFX1Fpg	Mr. @ImranRiazKhan asks a question, asks for an answer, then does physical, sexual, mental violence. But what to do if you don't have honor, how can you make yourself unconscious by putting a tape on your mouth. where to go now If you keep silent, conscience blames you, if you ask for answers, you go with your soul 😭 https://t.co/WurWFX1Fpg	3 مارچ کی پریڈ کے دوران ہمیں ہر قسم کا ہیلی کاپٹر دکھایا جاتا ہے۔ اب ریسکیو آپریشن کے لیے نہیں تو یہ ہمارے کیس کام کے(	During the March 3rd parade we saw all kinds of helicopters is shown. Now if not for the rescue operation then this is ours of case work (	Hate
1598948527022886912	جانتے ہو سب سے بڑی اذیت کیا ہے اپنی آنکھوں کے سامنے اپنی ہی اہمیت کو کم ہوتے ہوئے دیکھنا اور چپ کی چادر اوڑھ کر زندگی کے سفر پر رواں دواں ۔۔! #اپنی_زبان_اردو https://t.co/CdJ3P6Mp9B	Do you know what is the biggest torture? Seeing your own importance diminishing in front of your eyes and walking on the journey of life wearing a cloak of silence. #Apni_Zaban_Urdu https://t.co/CdJ3P6Mp9B	NIL	NIL	No_Hate
1578993734112358400	@hinaparvezbutt گشتی کنیز مادرچود طوائف ماں کی ناجائز اولاد لعنت تم پر 🖐🏿🥾🖐🖐🏿🖕🖐🏿🐕‍🦺🖐🏿🐕‍🦺🖐🏿🥾🖐🥾🖐🖐🏿🐕‍🦺🖐🏿🐕‍🦺🖐🏿🖐🖕🖐🖕🖐🏿🖕🖐🏿🐕‍🦺🖐🏿🐕‍🦺🖐🏿🖐🥾🖐🏿🐕‍🦺 https://t.co/nyjc2Tzhg9	@hinaparvezbutt illegitimate child of a prostitute mother curse you 🖐🏿🥾🖐🖐🏿🖕🖐🏿🐕 🦺🖐🏿🐕 🦺🖐🏿🥾🖐🥾🖐🖐🏿🐕 🦺🖐🏿🖐🥾🖐🏿🐕 🦺 https://t.co/nyjc2Tzhg9	NIL	NIL	Hate
1566530181078163456	اب عمران نیازی ر*** کے بچے کو بولو بھوسڑی کے بھڑوے بڑھکیں نہ مار دیکھ چور کو ڈاکو ملک دشمن کون دلے تو کہہ رہا ہے نا اب میں بہت خطرناک ہونگا اور ہو گیا ہوں ستر ہزار اسنائیپرز تجھے گھیرے ہوئے ہیں صرف ایک اشارے کی دیر ہے تیرا مغز کتے کھا رہے ہوں گے بہت جلد ایسا ہونے جارہا ہے https://t.co/ucbgdV1AEs https://t.co/f9PbVw7e7Z	Now tell Imran Niazi's son, don't kill the old man, don't look at the thief, the robber, the enemy of the country. It's too late, the dogs will be eating your brains, it's going to happen very soon https://t.co/ucbgdV1AEs https://t.co/f9PbVw7e7Z	ول ران نان وزی اعم کب اور پاکتا	Will Ran Nan Wazi aam kab and pakata	Hate
1563648402390392833	@hinaparvezbutt بھنگے کھسرے تمہیں بس یے چاہیئے شریفوں کا کھوٹا جاتی عمرہ آخری سانسوں پر ھے https://t.co/D6HiG5X0rn	@hinaparvezbutt Bhange Khasre, you just need it. Sharif's lost Umrah is on its last breath.	NIL	NIL	Hate
1615590011822559232	وہ اپنے ہونٹوں سے اتری ہوئی چائے دے کر مجھ پر احسانوں کے پہاڑ گرا دیتی ہے🥰 https://t.co/JBFqW0wIF2	He gave the tea that fell from his lips Drops mountains of favors on me. https://t.co/JBFqW0wIF2	NIL	NIL	No_Hate
1578777813007872001	@AftabIqbalFan یہ تو مکافات عمل ہے پی ٹی آئی حکومت نے ان معصوم غلاماں مصطفی صلی اللّٰہ علیہ وآلہ وسلّم پر ظلم کیا تھا ۔۔ اس کا حساب تو آپ نے دینا ہے ابھی تو آغاز ہے آگے دیکھیے ہوتا ہے کیا ۔ انشاء اللہ اللّٰہ تعالیٰ آپ کو ذلیل و رسواء کرے گا ۔ساری دنیا کے لیے آپ نشانے عبرت ہوں گے https://t.co/BtuMcGiaPH	@AftabIqbalFan This is a disgraceful act. The PTI government had wronged these innocent slaves of Prophet Muhammad (PBUH). You have to account for it, it is just the beginning, let's see what happens. Inshallah, Allah Ta'ala will humiliate you. You will be a lesson for the whole world https://t.co/BtuMcGiaPH	NIL	NIL	Hate
1578004555425538052	کتنا مشکل ہے جلانا کسی رستے میں چراغ کتنا آساں ہے ہواؤں کو اشارہ کرنا؀ https://t.co/ZY1UVHb8xy	How difficult is it to light a lamp on a path? How easy it is to signal the winds https://t.co/ZY1UVHb8xy	رے	Ray	No_Hate
1567928488052531202	مسلم لیگ ن کے قائد تاحیات نے چشتیاں کے لوگوں سے بھی اپیل کی کہ وہ ان کی پارٹی کو ووٹ دیں اور ایک منتخب وزیر اعظم کو گرانے والے سازشیوں کو مسترد کریں۔ میرے لیے، مجھے اتنی بڑی تعداد میں ووٹ دیں کہ نااہلی کا یہ فیصلہ بوجھ تلے دب جائے۔ #ChishtianPMLNKa https://t.co/V3BRYTM70q	The PML-N leader also appealed to the people of Chishtiyan to vote for his party and reject the conspirators who wanted to topple an elected prime minister. For me, vote me in such a large number that this decision of disqualification is overburdened. #ChishtianPMLNKa https://t.co/V3BRYTM70q	NIL	NIL	No_Hate
1593627478433697794	@naddiyyaathar یہ تیرا باپ معلوم ہوتا ھے جھوٹا پروپیگینڈا کرنے والا بیضمیر لعنتی کوشرم نہیں آتی جھوٹ بولتے ہوئے https://t.co/HKDYKXkqNF	@naddiyyaathar This appears to be your father, a lying propagandist, an unscrupulous bastard who has no shame in lying https://t.co/HKDYKXkqNF	NIL	NIL	Hate
1573233745175379968	ملک بھر میں آج موسم خشک اور گرم رہیگا:محکمہ موسمیات https://t.co/92DQT6KUZC #Pakistan #Hot #Dry #WeatherForecast @WeatherWupk @Pak_Weather @pmdgov https://t.co/uDSXN0DB7Q	The weather will be dry and hot across the country today: Meteorological Department https://t.co/92DQT6KUZC #Pakistan #Hot #Dry #WeatherForecast @WeatherWupk @Pak_Weather @pmdgov https://t.co/uDSXN0DB7Q	NIL	NIL	No_Hate
1578054886008266755	مرکزی صدر جے ٹی آئی ہدایت اللہ پیرزادہ ،مرکزی سیکریٹری جنرل جے ٹی آئی آصف اللہ مروت مفتی محمود کانفرنس کنونشن سینٹر اسلام آباد 15 اکتوبر 2022 کا دعوت نامہ مرکزی سیکریٹری جنرل سنیٹر مولانا عبدالغفور حیدری صاحب کو پیش کر رہے ہیں ۔اس موقع پر مرکزی ترجمان اسلم غوری بھی موجود تھے ۔ https://t.co/sWxlPuNj00	Central President JTI Hidayatullah Pirzada, Central Secretary General JTI Asifullah Marwat Mufti Mehmood Conference Convention Center Islamabad 15 October 2022 The Central Secretary General is presenting the invitation to Maulana Abdul Ghafoor Hydari Sahib. Central Spokesperson Aslam Ghori was also present on this occasion. https://t.co/sWxlPuNj00	NIL	NIL	No_Hate
1566426884375715840	ایشیاء کپ،پاکستان کاٹاس جیت کر پہلےفیلڈنگ کا فیصلہ https://t.co/Ikv8lnUrc1 https://t.co/Mf2bFTzBCK	After winning the Asia Cup, Pakistan decided to field first https://t.co/Ikv8lnUrc1 https://t.co/Mf2bFTzBCK	NIL	NIL	No_Hate
1566861457551233028	بلوچ روایات میں عورت کی اوپر ہاتھ اٹھانا بزدلی ہے اور قتل کا کوئی سوچ نہیں سکتا ۔ شاہینہ شاہین کی قاتل دراصل بلوچ کھلانے کی لائق نہیں ہے ۔ #JusticeForShahinaShahin @masooma_shaheen @Advjalila @Aneesabaloch6 https://t.co/0mq6wr7GOh	In Baloch traditions, raising a hand on a woman is cowardice and no one can think of murder. The killer of Shahina Shaheen is actually not worthy to feed Baloch. #JusticeForShahinaShahin @masooma_shaheen @Advjalila @Aneesabaloch6 https://t.co/0mq6wr7GOh	NIL	NIL	No_Hate
1587515010057523201	ارشد شریف کو پولیس نے سر میں گولی مار کر ہلاک کیا، کینیا میڈیا https://t.co/ukecFKHZAE #dailypakistan #arshadsharif https://t.co/oKRD04uK0n	Arshad Sharif was shot in the head by police, Kenyan media https://t.co/ukecFKHZAE #dailypakistan #arshadsharif https://t.co/oKRD04uK0n	شش ریف کو لیس نے می کو کی ۰ء" 1 اتتتان ۴ .1311۷68۴1530 530.0۴ 53ا31 (ل از 3۸۰۲۸ دم ا031 ا گی یی بت ٭۔	Shush ref to Les did to me 0" 1 Attattan 4.131176841530 530.04 53A31 *	No_Hate
1560156149755908096	پاکستانی سفارت خانہ واشنگٹن میں لسبیلہ ہیلی کاپٹر حادثے میں شہید ہونے والے پاک فوج کے افسران اور جوانوں کی یاد میں تعزیتی ریفرنس کا انعقاد۔ @Masood__Khan @PakinUSA https://t.co/Ui2ITfTeyK https://t.co/vhXdCaGTNe	A condolence reference was held at the Pakistan Embassy in Washington in memory of the officers and soldiers of the Pakistan Army who were martyred in the Lasbela helicopter crash. @Masood__Khan @PakinUSA https://t.co/Ui2ITfTeyK https://t.co/vhXdCaGTNe	NIL	NIL	No_Hate
1614460416608075776	تاریخ میں عربی زبان کے مشہور شاعروں میں سے ایک ابو نواس نامی شخص تھا۔ اپنی ادبی صلاحیتوں کے علاوہ، وہ خاص طور پر اپنی تحریروں کے گستاخانہ مواد کے لیے جانے جاتے تھے۔ وہ نشے میں دھت ہونے کی خوشیوں کی تعریف کرتا ۔عورتوں کے عشق میں نظمیں لکھتا اور انسانی خواہشات کو کھل کر بیان کرتا https://t.co/XP3zXJxR5d	One of the famous poets of the Arabic language in history was a man named Abu Nawas. In addition to his literary talents, he was particularly known for the profane content of his writings. He praised the joys of drunkenness, wrote love poems for women and openly described human desires https://t.co/XP3zXJxR5d	NIL	NIL	No_Hate
[truncated: 1,386 more rows]
