# Supplementary material for: Multimodal hate speech detection: a novel deep learning framework for multilingual text and images
Source: PeerJ Comput Sci. 2025 Apr 16;11:e2801. doi: 10.7717/peerj-cs.2801 (PMC12190340; doi:10.7717/peerj-cs.2801)
Supplement: Supplemental Information 16 [file peerj-cs-11-2801-s016.xlsx]

## Sheet: Sheet1
S#	Keyword(Urdu)
1	بازارو
2	بمبو
3	بنڈ
4	بھڑو
5	بوسڑی
6	پچکاری
7	پچھواڑے
8	پنجابی
9	پھاڑ
10	پیشاب
11	ٹٹے
12	جج
13	جرنیل
14	جلا
15	چکلا
16	چوت
17	چوتیا
18	چود
19	چور
20	حرامی
21	خارجی
22	خبیث
23	خسرا
24	دہشتگرد
25	ڈیزل
26	رنڈی
27	ریپ
28	سازش
29	شلوار
30	شیعہ
31	طوائف
32	غداری
33	فاحشہ
34	فوج
35	کافر
36	کتا
37	گانڈ
38	لنڈ
39	مار
40	موٹی
41	ابلیس
42	احمدی
43	انڈیا
44	بدنسل
45	بریلوی
46	بلوچ
47	پاکستان
48	پٹھان
49	ٹھرکی
50	جہنمی
51	جھوٹ
52	چوتڑ
53	حبشی
54	حنفی
55	خنزیر
56	دلا
57	دیوبندی
58	ذلیل
59	زنا
60	سندھی
61	اسرائیل
62	امریکہ
63	ایجنٹ
64	برگیڈ
65	بےغیرت
66	پھدی
67	چوکیدار
68	ڈاکو
69	زندیق
70	سور
71	سیکس
72	شرمناک
73	صیہونی
74	عیسائی
75	فتنہ
76	فحاشی
77	فساد
78	قادیانی
79	قتل
80	کالا
81	کریلا
82	کُکڑی
83	کنجر
84	کنڈم
85	کونڈم
86	کوٹھا
87	کھسرا
88	کھوتا
89	گشتی
90	لبرل
91	مذمت
92	مرتد
93	مردود
94	مسلمان
95	مشرک
96	ملحد
97	مہاجر
98	نامرد
99	نانی
100	نفرت
101	نیازی
102	نیوٹرل
103	وارشل
104	وہابی
105	وھابی
106	ہندو
107	ہیجڑا
108	ہیرامنڈی
109	یوتھیا
110	یہودی
111	بکواس
112	بمبار
113	بھکاری
114	پارسی
115	پٹواری
116	پروپیگنڈا
117	پھٹو
118	تشدد
119	جانور
120	چت
121	ابو
122	افغان
123	امپورٹڈ
124	انتہاپسند
125	بدعتی
126	بندوق
127	بھوسڑی
128	پٹوارن
129	پشتون
130	پیرنی
131	طوخم
132	تھن
133	ٹوپا
134	جہاد
135	چبل
136	چپیڑ
137	چرسی
138	چوپا
139	چوول
140	خوارج
141	خودکش
142	ڈبو
143	ڈڈو
144	ڈنڈا
145	ڈھیٹ
146	زنخا
147	سالے
148	سلیکٹڈ
149	سنی
150	شوباز
151	گنوار
152	گھٹیا
153	گئوماتا
154	لڑائی
155	لعنت
156	لن
157	لوڑا
158	لونڈےباز
159	مادرچود
160	مجرا
161	مراثی
162	مردار
163	مسلا
164	ملعون
165	ممے
166	منحوس
167	ناجائز
168	ننگا
169	ہتھیار
170	ہندوتوا
171	بچی
172	بدتر
173	برگر
174	بندریا
175	بھتنی
176	بھنگی
177	پلید
178	تباہ
179	جسم
180	چوتیے
181	آوارہ
182	احمدیہ
183	احمق
184	اعتراض
185	الو
186	اھمدی
187	ایجینڈا
188	بدزبان
189	برباد
190	بغض
191	بونڈ
192	بھوتنی
193	بھینس
194	بیہودہ
195	پٹھو
196	پھدکی
197	تباہی
198	جاھل
199	چٹنی
200	چکنی
201	چولیں
202	چھترول
203	حملہ
204	درندہ
205	دشمن
206	دونمبر
207	ڈھیلا
208	رذیل
209	سالا
210	سالی
211	انپڑھ
212	بچہ
213	بزدلی
214	بلوچی
215	بھڑاس
216	بھونک
217	بےعزت
218	پاگل
219	پھٹ
220	پیرپرست
221	پینڈو
222	تخم
223	تذلیل
224	ٹٹی
225	جھگڑا
226	چالاک
227	چتیاپا
228	چماٹے
229	چوپو
230	چودو
231	چومیاں
232	چھرے
233	خاتمہ
234	خلاف
235	خوار
236	درندگی
237	دنگا
238	ڈفر
239	ڈھکن
240	ذلت
241	احتجاج
242	انگلی
243	بگٹی
244	بھڑوے
245	پھدا
246	پھونک
247	تحقیر
248	تناؤ
249	ٹٹہ
250	ججوں
251	جرنیلوں
252	چکلہ
253	چوتیوں
254	چول
255	چھپکلی
256	حلالہ
257	دلے
258	ڈاکا
259	ڈنگر
260	ذیادتی
261	رکیک
262	زانی
263	زہر
264	سکینڈل
265	شرابی
266	شرک
267	شیطان
268	طالبان
269	عریانی
270	غلاظت
271	آزادی
272	باڈر
273	بندر
274	بے اخلاق
275	پھدو
276	جھنڈ
277	جھوٹی
278	چودوں
279	حرام
280	خسرے
281	خوف
282	دفع
283	دلی
284	دنگے
285	ڈرامے
286	ڈوب
287	رنڈیاں
288	زانیہ
289	سفید فام
290	شدت پسند
291	شدید
292	شکست
293	ظالم
294	ظلم
295	عرب
296	عربی
297	غلیظ
298	فائرنگ
299	فتنے
300	فحش
301	فراڈ
302	فرقہ
303	فریب
304	فوجی
305	قابض
306	قبر
307	قبیح
308	کالی
309	کالے
310	کتی
311	کتیا
312	کتے
313	کجھلی
314	کرائم
315	کرپٹ
316	کڑوا
317	کفار
318	کفر
319	کمینگی
320	کمینی
321	کنجری
322	کنجوس
323	کوٹھے
324	کھسرے
325	کھسی
326	کھوتی
327	کیڑا
328	کیڑے
329	گالی
330	لٹیرے
331	یوتھئے
332	ہیجڑہ
333	ہلاک
334	ہاٹ
335	ہزارہ
336	واشل
337	نیوٹرلز
338	ننگی
339	نکا
340	نکی
341	نشانہ
342	نسلی
343	نسل کشی
344	نامعلوم
345	ناکام
346	ناکارہ
347	نازیبا
348	نازی
349	ناپسند
350	مسئلہ
351	مھاجر
352	مودی
353	موچی
354	موٹا
355	منجن
356	منڈی
357	منافقت
358	منافق
359	مموں
360	مکار
361	مقلد
362	مکار
363	مغلظات
364	مصیبت
365	مسلم
366	مرزائ
367	مرچی
368	مرچیں
369	مذموم
370	مذہب
371	مراثن
372	مداخلت
373	مال
374	مٹھ
375	مارچ
376	مافیا
377	لوڑوں
378	لوڑے
379	لومڑی
380	لونڈا
381	لونڈیا
382	لہولہان
383	لوٹا
384	لعنتیوں
385	للی
386	لالچی
387	گیدڑ
388	گن
389	گنجا
390	گندا
391	لعنتی
392	گندی
393	گستاخ
394	گدھا
395	گدھے
396	کمینہ
397	ذلیلوں
398	دہشت
399	چھرا
400	چودا
401	چکلے
402	جھوٹے
403	چادر
404	جھوٹا
405	ٹوپی
406	پناہ گزین
407	بےغیرتی
408	بھڑوی
409	بھڑوا
410	بمباری
411	بازار
412	بچاو
413	بھنگیوں
414	پھدیاں
415	جلانا
416	چورنی
417	طوائفوں
418	غدار
419	فک
420	کمینے
421	ناسور
422	جرم
423	بدکار
424	ٹھٹھے
425	ڈائن
426	توہین
427	بھگوڑے
428	مجرمہ
429	لفافہ
430	بروکر
431	بھارت
432	بہروپیہ
433	رکھیل
434	زرداری
435	عبرت
436	فنڈنگ
437	کپتان
438	لوٹوں
439	عورت
440	عمران
441	مریم
442	بلاول
443	چمار
444	نواز
445	مولانا
446	عمرانڈو
447	نیچ
448	گھناؤنا
449	گرم
450	اسلام
